# Supplementary material for: Gene Expression Pattern and Regulatory Network of α-Toxin Treatment in Bombyx mori
Source: Hindawi journal article supplement (doi:10.1155/2019/7859121), 2019-03-05

BGIBMGA000329

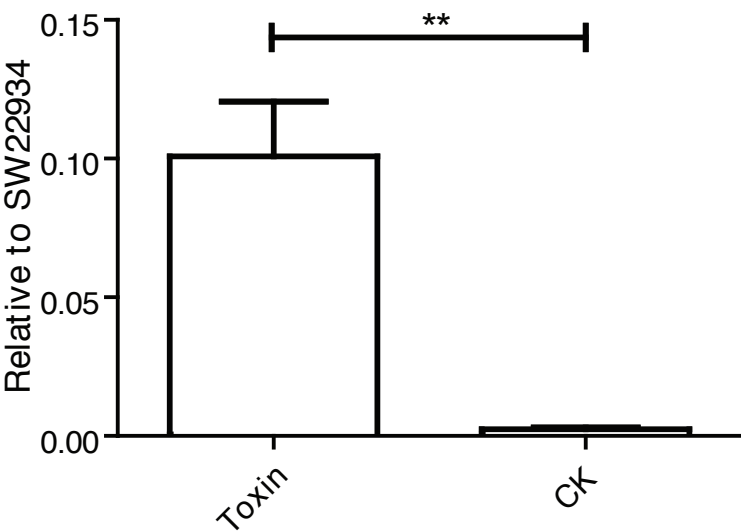

BGIBMGA014370

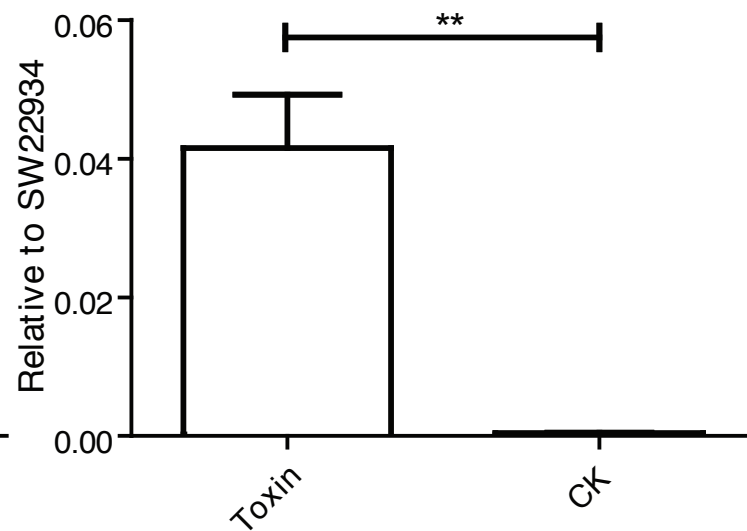

BGIBMGA013864

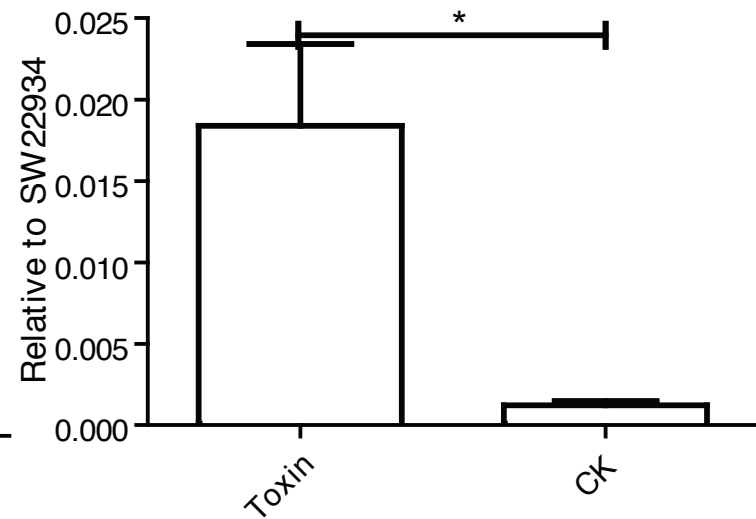

BGIBMGA013803

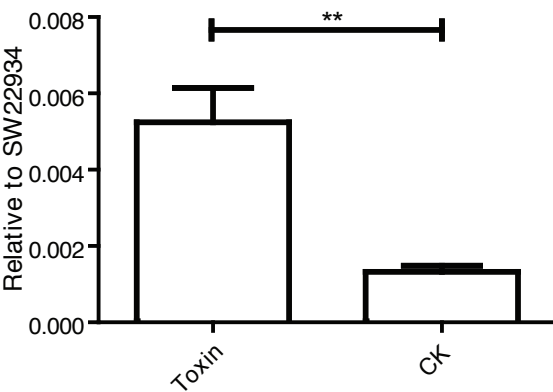

BGIBMGA010439

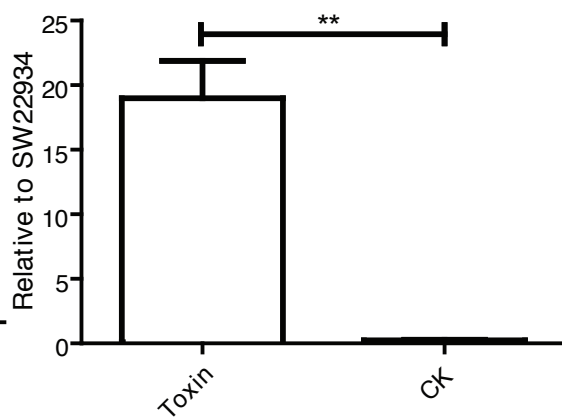

BGIBMGA003199

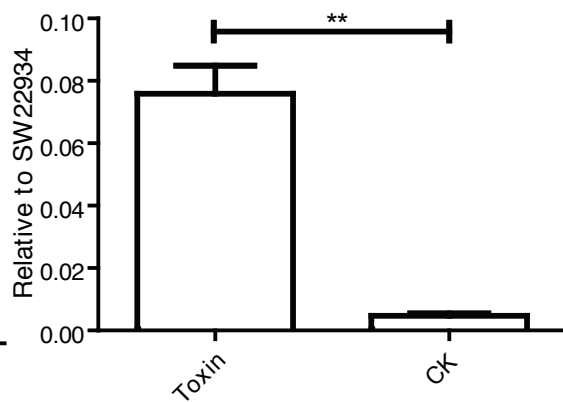

BGIBMGA002664

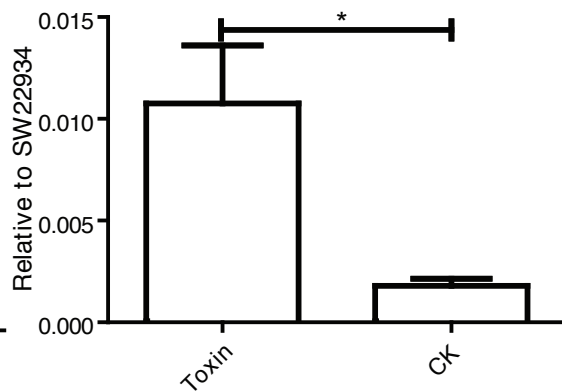

Supplement: f5 [file 7859121.f5.pdf]
