# Supplementary material for: Gene Expression Pattern and Regulatory Network of α-Toxin Treatment in Bombyx mori
Source: Hindawi journal article supplement (doi:10.1155/2019/7859121), 2019-03-05

bmlnct\_0261

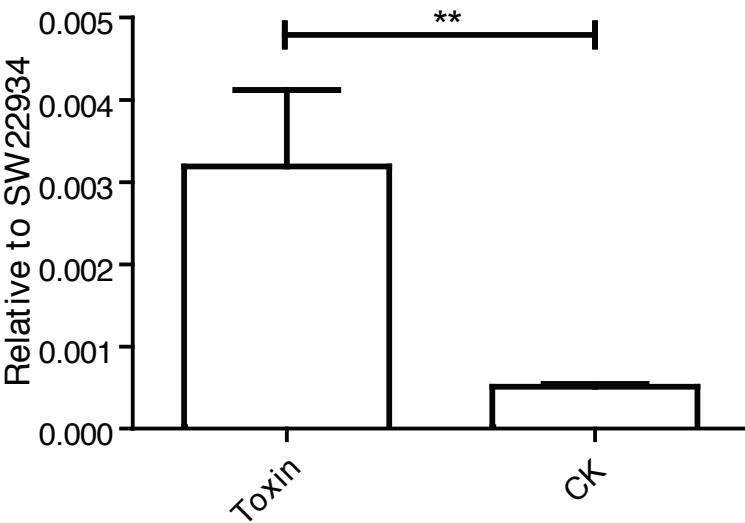

BP120347

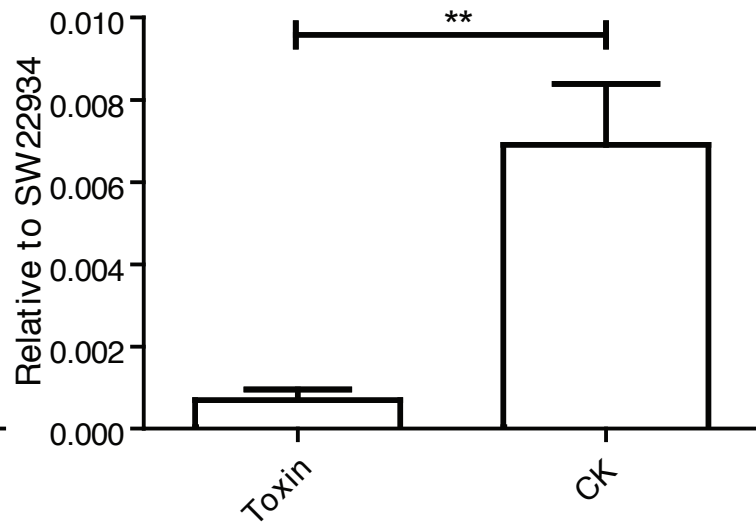

bmlnct\_4427

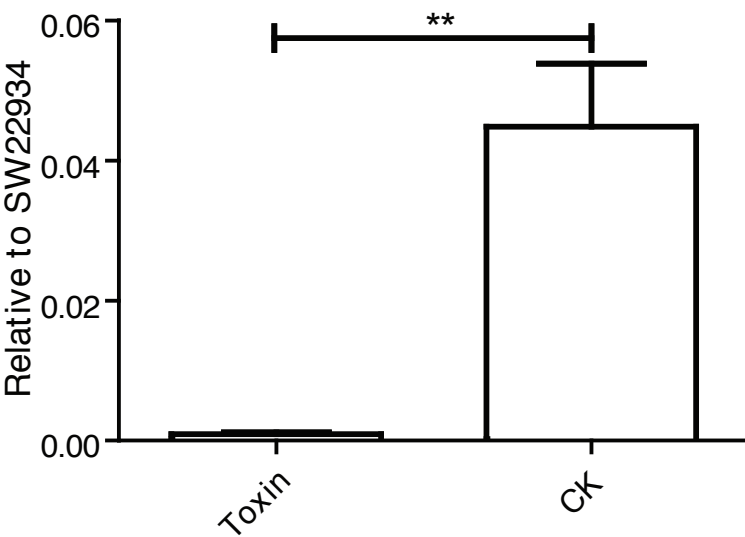

bmlnct\_3581

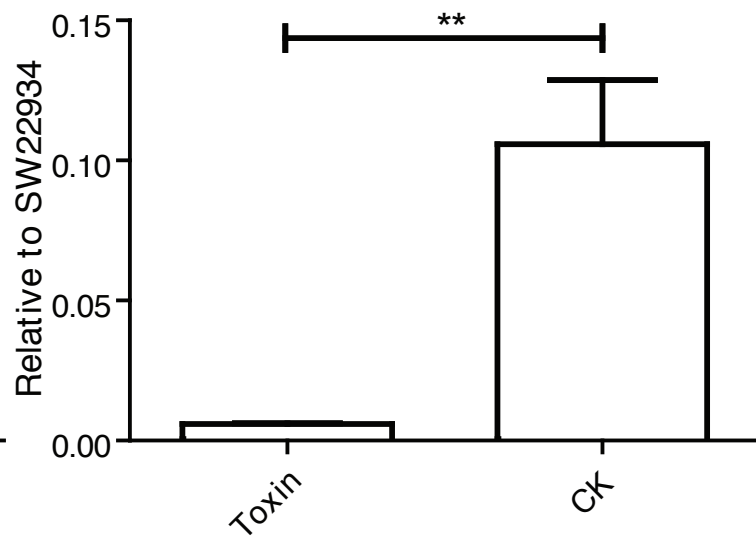

Supplement: f8 [file 7859121.f8.pdf]
