# Supplementary material for: Gene Expression Pattern and Regulatory Network of α-Toxin Treatment in Bombyx mori
Source: Int J Genomics. 2019 Mar 5;2019:7859121. doi: 10.1155/2019/7859121 (PMC6425383; doi:10.1155/2019/7859121)
Supplement: Supplementary 1 — Table 1: primers used for qRT-PCR for the validation of the selected differentially expressed genes. [file 7859121.f1.xls]

## Sheet: sheet1
gene ID	description	sense primer	anti-sense primer
BGIBMGA000329	larval cuticle protein	GCCTGCCTACTGCTTAATACTCTCA	AGGTCATCCACAATGCGTTTCCA
BGIBMGA002664	cuticle protein 3	CTTATGTTGGCGAGGCTACAGTTCA	TCGTCGTAGTTATGCTTCTGCTTGA
BGIBMGA003199	dopa-decarboxylase	GCATCTGTAGTGAGATCGCTAACCA	GCATCCAGGCTATCCGTTCATACA
BGIBMGA010439	lysozyme	TGAATCTGGTTACTCACAGTTCCTC	TTGTCCTCTGCGTTGGTTCTGA
BGIBMGA012864	peptidoglycan recognition protein B	CTCTCACAGTCTGCTCGAACTAAG	CCACCAACAATGACATCACCACTC
BGIBMGA013803	gloverin-like protein 3	GTAATGGTACGCAGCAGCATAGGT	GCCCGATTTACTATTGGACCCTCAA
BGIBMGA013864	antibacterial peptide	ATTAGCGACAAACAGTGCGAAATCC	CCACGATGATCCTGAATACCGACAT
BGIBMGA013865	antibacterial peptide	TTCACGAACGAACCTCACCATGTAG	TCCACCCTCAGCAATACCCAACTAT
BGIBMGA014370	Toll	TTGCCTGAGGAGATGTTGAAGACTG	ATGATAGTTGCCAGCGAGATAGGTC
BGIBMGA014429	serine protease	TTCCATCTGCGGAGCTTCCTTACT	CGTCGTTGTTGAGGTTGTTCATGTT
