# Supplementary material for: Gene Expression Pattern and Regulatory Network of α-Toxin Treatment in Bombyx mori
Source: Int J Genomics. 2019 Mar 5;2019:7859121. doi: 10.1155/2019/7859121 (PMC6425383; doi:10.1155/2019/7859121)
Supplement: Supplementary 2 — Table 2: primers used for qRT-PCR for the validation of the selected differentially expressed lncRNAs. [file 7859121.f2.xls]

## Sheet: sheet1
Accession number	Sense Primer	Anti-sense Primer	Template
bmlnct_3581	TGTCAAGAAGGAGGCGTAGG	GTGGTCACTTGTCATCGTTAGAT	fatbody
bmlnct_4322	TACTCGCTATCGTTCTCCTGAA	CCAGACCTCACCACTACACC	fatbody
bmlnct_4427	CAACTCAACTTTCAGCACGAAT	TAGCCTACGCCTCCTTCTTG	fatbody
BP120347	GACAATTCAATGAGGCGGATG	CGGTAACTACAATATACTAGGAACG	fatbody
AK382643	ATACGACCGCAACTACAATAGC	TTAGTTACAGCGTCAGAGCAATC	fatbody, midgut
AK386966	AAGTGCTGCGATATGAGGTT	CAATGCTAGTTGCCAGAGTGA	midgut
bmlnct_0261	TTGAGGAGCGGTGAGTAGTT	GGCAGAAGTAACGATAAGAGAAGT	midgut
bmlnct_0288	CCAGTGCGTAGGTTCATTCG	AGTGGTATGGTGTGGAGAGTG	midgut
SilkDB_TCONS_00178135	CGTGTTCCGAATATAGCTTGATC	GACCGATAATGCGACCGTATT	midgut
