# Supplementary material for: Gene Expression Pattern and Regulatory Network of α-Toxin Treatment in Bombyx mori
Source: Int J Genomics. 2019 Mar 5;2019:7859121. doi: 10.1155/2019/7859121 (PMC6425383; doi:10.1155/2019/7859121)
Supplement: Supplementary 3 — Table 3: statistics of the mapped reads for each sequencing library. [file 7859121.f3.xls]

## Sheet: 工作表1
Sample	# reads	% mapped reads	% reads aligned concordantly 1 time	% reads aligned concordantly >1 times
CK_hemocyte_1	23694331	91.93	69.54	19.53
CK_hemocyte_2	24197037	91.89	74.88	14.65
CK_hemocyte_3	24682941	91.49	74.54	14.61
CK_cell_1	26213321	78.04	55.22	18.4
CK_cell_2	26144182	78.4	55.63	18.16
CK_cell_3	25640642	78.26	55.63	17.99
CK_fatbody_1	29139141	93.07	72.17	17.65
CK_fatbody_2	30527115	93.67	75.49	15.66
CK_fatbody_3	30001509	93.56	74.05	16.89
CK_midgut_1	24276491	91.76	72.81	15.05
CK_midgut_2	29923465	92.16	71.35	17.88
CK_midgut_3	31365404	91.54	71.42	17.69
Toxin_hemocyte_1	24550265	89.35	71.14	16.01
Toxin_hemocyte_2	24583555	88.54	69.45	17.08
Toxin_hemocyte_3	24355127	89.34	70.55	16.62
Toxin_cell_1	23787498	77.08	54.46	17.56
Toxin_cell_2	25622412	77.71	53.61	19.41
Toxin_cell_3	28477949	77.12	55.02	17.47
Toxin_fatbody_1	31160193	92.63	69.4	20.46
Toxin_fatbody_2	28849794	92.24	67.93	21.64
Toxin_fatbody_3	27668786	88.54	61.4	23.03
Toxin_midgut_1	28961976	84.49	57.04	23.76
Toxin_midgut_2	29204649	90.55	68.85	19.24
Toxin_midgut_3	28569525	90.13	68.51	18.7
