# Supplementary material for: Gene Expression Pattern and Regulatory Network of α-Toxin Treatment in Bombyx mori
Source: Int J Genomics. 2019 Mar 5;2019:7859121. doi: 10.1155/2019/7859121 (PMC6425383; doi:10.1155/2019/7859121)
Supplement: Supplementary 4 — Table 4: differential expression analysis and cluster analysis results of genes. [file 7859121.f4.xls]

## Sheet: table 1
			annotation			fatbody				midgut				cell				hemocyte				TMM value
gene	color of subcluster	over expressed sample	function	e-value	identity	logFC	logCPM	PValue	FDR	logFC	logCPM	PValue	FDR	logFC	logCPM	PValue	FDR	logFC	logCPM	PValue	FDR	CK_blood-1	CK_blood-2	CK_blood-3	CK_cell-1	CK_cell-2	CK_cell-3	CK_fatbody-1	CK_fatbody-2	CK_fatbody-3	CK_midgut-1	CK_midgut-2	CK_midgut-3	Toxin_blood-1	Toxin_blood-2	Toxin_blood-3	Toxin_cell-1	Toxin_cell-2	Toxin_cell-3	Toxin_fatbody-1	Toxin_fatbody-2	Toxin_fatbody-3	Toxin_midgut-1	Toxin_midgut-2	Toxin_midgut-3
BGIBMGA002971	blue	CK_hemocyte,Toxin_cell	gi|512926077|ref|XP_004930995.1| PREDICTED: histidine-rich membrane protein KE4 homolog 2-like [Bombyx mori]	0	100	NA	NA	NA	NA	NA	NA	NA	NA	8.02391	4.21133	7.03507e-06	0.00338426	-7.34302	3.93697	8.69072e-05	0.00191754	70.772	0	0	0	0	0	0	0	224.728	0	0	165.828	0	0	0	74.898	0	0	216.696	218.617	220.85	0	151.448	0
BGIBMGA000018	black	Toxin_fatbody	gi|153791246|ref|NP_001093310.1| antibacterial peptide enbocin 3 precursor [Bombyx mori]	1e-30	100	3.78721	2.34612	0.000520361	0.0058636	NA	NA	NA	NA	NA	NA	NA	NA	NA	NA	NA	NA	0	0	0.621	0	0	0	0	0	1.255	0	0	0	0	0	0	0	0	0	7.95	9.684	4.2	0	0	0
BGIBMGA000020	turquoise	Toxin_fatbody	gi|512906182|ref|XP_004926132.1| PREDICTED: cecropin-A-like [Bombyx mori]	5e-34	100	5.60555	2.34812	1.53269e-05	0.000288619	NA	NA	NA	NA	NA	NA	NA	NA	NA	NA	NA	NA	0	0	0	0	0	0	0	0.425	0	0	0	0	1.456	1.398	1.199	0	0	0	7.62	9.246	6.998	0	0	0
BGIBMGA000021	brown	Toxin_hemocyte,Toxin_fatbody	gi|112984238|ref|NP_001037460.1| cecropin-B precursor [Bombyx mori] gi|156523056|ref|NP_001096031.1| cecropin B precursor [Bombyx mori] gi|512906063|ref|XP_004926103.1| PREDICTED: cecropin-B-like [Bombyx mori] gi|512906067|ref|XP_004926104.1| PREDICTED: cecropin-B-like [Bombyx mori] gi|512906075|ref|XP_004926106.1| PREDICTED: cecropin-B-like [Bombyx mori] gi|512906079|ref|XP_004926107.1| PREDICTE…	2e-35	100	8.2719	8.28761	1.92592e-175	2.87705e-172	NA	NA	NA	NA	NA	NA	NA	NA	1.98245	4.06716	2.07124e-06	6.59918e-05	2.262	5.837	3.985	0	0	0.106	1.491	2.253	3.609	0	0.868	0.416	18.018	17.852	20.253	0	0.328	0.396	803.155	735.367	713.681	5.572	2.877	0
BGIBMGA012389	blue	CK_hemocyte,Toxin_midgut	gi|108871558|gb|EAT35783.1| AAEL012076-PA [Aedes aegypti]	6e-23	35.22	NA	NA	NA	NA	6.64246	2.86817	0.000460726	0.00931995	NA	NA	NA	NA	-6.88201	3.81175	0.000268783	0.00520656	0	49.846	0	0	49.436	0	0	0	0	0	0	0	0	0	0	0	55.746	54.229	0	0	0	0	0	51.736
BGIBMGA000023	green	Toxin_fatbody	gi|112984238|ref|NP_001037460.1| cecropin-B precursor [Bombyx mori] gi|156523056|ref|NP_001096031.1| cecropin B precursor [Bombyx mori] gi|512906063|ref|XP_004926103.1| PREDICTED: cecropin-B-like [Bombyx mori] gi|512906067|ref|XP_004926104.1| PREDICTED: cecropin-B-like [Bombyx mori] gi|512906075|ref|XP_004926106.1| PREDICTED: cecropin-B-like [Bombyx mori] gi|512906079|ref|XP_004926107.1| PREDICTE…	2e-35	100	7.9527	8.67493	7.12881e-200	2.48486e-196	NA	NA	NA	NA	NA	NA	NA	NA	NA	NA	NA	NA	0.926	2.319	1.284	0.444	0	0	5.895	1.721	3.258	0.895	0.207	0	8.779	3.31	7.056	0	0	0	1008.46	961.106	959.979	0.798	1.556	0.781
BGIBMGA000024	purple	Toxin_hemocyte,Toxin_fatbody	gi|112984238|ref|NP_001037460.1| cecropin-B precursor [Bombyx mori] gi|156523056|ref|NP_001096031.1| cecropin B precursor [Bombyx mori] gi|512906063|ref|XP_004926103.1| PREDICTED: cecropin-B-like [Bombyx mori] gi|512906067|ref|XP_004926104.1| PREDICTED: cecropin-B-like [Bombyx mori] gi|512906075|ref|XP_004926106.1| PREDICTED: cecropin-B-like [Bombyx mori] gi|512906079|ref|XP_004926107.1| PREDICTE…	2e-35	100	8.42807	8.65906	5.53142e-201	2.8921e-197	NA	NA	NA	NA	NA	NA	NA	NA	2.57547	4.00638	4.80103e-08	2.11861e-06	4.248	1.556	3.195	0.41	0.079	0	2.574	2.159	3.489	0.661	0.04	0	21.478	16.444	18.828	0	0.491	0	965.768	993.701	941.189	3.169	0.538	0
BGIBMGA000026	green	CK_hemocyte	no hints			NA	NA	NA	NA	NA	NA	NA	NA	NA	NA	NA	NA	-1.56672	4.52817	3.36891e-06	0.000104121	23.352	25.341	24.146	0.534	0.182	0	0.085	0.49	0	0	0	0	7.405	9.04	8.328	0.007	0.235	0.167	0.519	0.13	0.285	0	0.04	0
BGIBMGA000032	turquoise	Toxin_fatbody	gi|607304313|gb|EZA45560.1| Endonuclease/Exonuclease/phosphatase family protein [Microplitis demolitor]	2e-128	54.24	2.05474	3.21092	7.09619e-05	0.00108965	NA	NA	NA	NA	NA	NA	NA	NA	NA	NA	NA	NA	28.657	31.973	27.775	1.984	1.664	2.001	3.166	2.565	4.371	2.775	3.158	2.988	31.493	39.311	33.137	1.633	2.558	1.997	13.561	14.89	15.098	4.688	5.572	4.12
BGIBMGA000036	yellow	Toxin_hemocyte,Toxin_fatbody	gi|112984238|ref|NP_001037460.1| cecropin-B precursor [Bombyx mori] gi|156523056|ref|NP_001096031.1| cecropin B precursor [Bombyx mori] gi|512906063|ref|XP_004926103.1| PREDICTED: cecropin-B-like [Bombyx mori] gi|512906067|ref|XP_004926104.1| PREDICTED: cecropin-B-like [Bombyx mori] gi|512906075|ref|XP_004926106.1| PREDICTED: cecropin-B-like [Bombyx mori] gi|512906079|ref|XP_004926107.1| PREDICTE…	2e-35	100	7.218	8.18711	6.24655e-159	5.93819e-156	NA	NA	NA	NA	NA	NA	NA	NA	3.01834	3.56238	6.11912e-07	2.22445e-05	2.474	1.518	1.026	0	0	0.05	3.205	4.278	5.181	1.414	0.171	0.078	15.58	12.963	11.784	0.044	0.265	0.075	700.603	750.407	644.507	1.391	0.732	0
BGIBMGA008810	blue	CK_hemocyte,Toxin_fatbody	gi|512910098|ref|XP_004927084.1| PREDICTED: uncharacterized protein LOC101741012 isoform X1 [Bombyx mori] gi|512910102|ref|XP_004927085.1| PREDICTED: uncharacterized protein LOC101741012 isoform X2 [Bombyx mori] gi|512910106|ref|XP_004927086.1| PREDICTED: uncharacterized protein LOC101741012 isoform X3 [Bombyx mori]	9e-79	100	6.3865	2.84636	7.54341e-09	2.95337e-07	NA	NA	NA	NA	NA	NA	NA	NA	-6.11741	3.12812	3.30118e-05	0.000828004	17.908	12.796	0	0	0	0	0	0	0	0.421	0.736	0.207	0	0	0	0	0	0	14.449	13.501	13.192	0.48	0	1.064
BGIBMGA000038	turquoise	Toxin_hemocyte,Toxin_fatbody	gi|112984238|ref|NP_001037460.1| cecropin-B precursor [Bombyx mori] gi|156523056|ref|NP_001096031.1| cecropin B precursor [Bombyx mori] gi|512906063|ref|XP_004926103.1| PREDICTED: cecropin-B-like [Bombyx mori] gi|512906067|ref|XP_004926104.1| PREDICTED: cecropin-B-like [Bombyx mori] gi|512906075|ref|XP_004926106.1| PREDICTED: cecropin-B-like [Bombyx mori] gi|512906079|ref|XP_004926107.1| PREDICTE…	2e-35	100	7.80432	8.02392	1.48355e-165	1.72372e-162	NA	NA	NA	NA	NA	NA	NA	NA	3.09997	3.61846	1.88528e-07	7.62614e-06	1.844	2.287	1.443	0	0.1	0	4.122	1.96	1.057	0	0.364	0.702	15.157	14.889	13.41	0	0.076	0.141	635.949	643.299	603.252	0	0.558	0
BGIBMGA000039	purple	Toxin_fatbody	gi|148298851|ref|NP_001091844.1| antibacterial peptide enbocin 2 precursor [Bombyx mori]	6e-31	100	2.80745	2.29125	0.000979086	0.00999834	NA	NA	NA	NA	NA	NA	NA	NA	NA	NA	NA	NA	0	1.202	0.22	0	0	0	1.11	0	1.595	0	1.54	0.751	0	0.198	0	0	0	0	6.263	7.299	5.971	0.815	0	0
BGIBMGA000053	cyan	Toxin_hemocyte	gi|262034569|gb|ACY06909.1| putative cuticle protein CPG30 [Bombyx mori]	0	100	NA	NA	NA	NA	NA	NA	NA	NA	NA	NA	NA	NA	3.20949	2.5606	0.00342374	0.0449168	0.625	0.355	0.631	0	0	0.091	0.217	0.15	0.265	0	0	0.134	6.375	4.715	3.708	0	0.112	0	0.782	1.067	1.615	0	0	0
BGIBMGA000065	brown	CK_midgut	gi|512939991|ref|XP_004934367.1| PREDICTED: cystathionine beta-synthase-like isoform X2 [Bombyx mori]	0	90.72	NA	NA	NA	NA	-1.327	6.29094	4.39916e-13	6.83457e-11	NA	NA	NA	NA	NA	NA	NA	NA	1.561	1.262	0.679	0	0.216	0.116	7.499	9.157	5.518	169.218	168.515	160.929	0.707	2.076	1.478	0	0	0	12.03	13.157	13.599	65.876	61.365	68.604
BGIBMGA000074	turquoise	CK_midgut	gi|512893346|ref|XP_004923158.1| PREDICTED: rRNA 2'-O-methyltransferase fibrillarin-like [Bombyx mori]	0	100	NA	NA	NA	NA	-1.45028	6.96707	2.65087e-19	8.10396e-17	NA	NA	NA	NA	NA	NA	NA	NA	93.196	91.059	97.867	133.224	129.357	139.657	311.986	332.209	311.237	285.71	273.958	265.329	150.948	145.767	145.828	160.215	152.65	162.752	168.593	165.881	169.651	102.466	93.85	101.646
BGIBMGA006944	blue	CK_hemocyte,Toxin_midgut	gi|512893605|ref|XP_004923223.1| PREDICTED: protein Asterix-like isoform X1 [Bombyx mori] gi|512893609|ref|XP_004923224.1| PREDICTED: protein Asterix-like isoform X2 [Bombyx mori]	3e-43	100	NA	NA	NA	NA	5.50648	4.81289	1.70597e-07	1.00563e-05	NA	NA	NA	NA	-5.7481	5.16488	3.59304e-08	1.6114e-06	0.248	72.923	72.553	0.603	0.533	0.759	2.499	5.391	2.174	3.377	1.665	0.941	0.81	0.797	0.326	1.654	1.767	0.657	1.942	1.066	1.386	137.968	1.066	124.606
BGIBMGA000116	magenta	Toxin_hemocyte	no hints			NA	NA	NA	NA	NA	NA	NA	NA	NA	NA	NA	NA	1.52926	4.25845	5.95227e-05	0.00138752	7.947	8.827	2.764	0	0	0	35.383	35.984	34.129	20.074	16.896	30.284	21.211	19.049	20.222	0	0	0	68.97	53.53	43.471	45.876	31.936	32.803
BGIBMGA000183	red	CK_fatbody	gi|512912172|ref|XP_004927591.1| PREDICTED: cysteine dioxygenase type 1-like [Bombyx mori]	2e-50	100	-1.90917	2.82667	0.00663128	0.0494956	NA	NA	NA	NA	NA	NA	NA	NA	NA	NA	NA	NA	0	0	0	0	0	0.594	7.238	9.126	7.083	0	0	0	0	0	0	0.345	0	0	2.118	2.807	0.722	0	0	0
BGIBMGA000184	turquoise	Toxin_fatbody	gi|512912172|ref|XP_004927591.1| PREDICTED: cysteine dioxygenase type 1-like [Bombyx mori]	2e-101	94.7	3.16955	4.77748	8.23658e-26	1.11857e-23	NA	NA	NA	NA	NA	NA	NA	NA	NA	NA	NA	NA	0	0	0	0.428	0.221	0.096	8.23	5.766	4.924	0	0	0	0	0	0	0.155	0.421	0.041	58.246	65.072	54.346	0	0	0
BGIBMGA000207	purple	Toxin_hemocyte	gi|512937156|ref|XP_004933698.1| PREDICTED: fibrillin-1-like [Bombyx mori]	0	94.88	NA	NA	NA	NA	NA	NA	NA	NA	NA	NA	NA	NA	1.29582	7.77124	1.12051e-15	1.54107e-13	112.154	101.876	90.127	0.335	0.271	0.325	171.893	131.581	180.657	18.276	21.607	21.312	250.213	271.103	234.993	0.343	8.72	0.08	223.181	214.387	200.105	24.958	24.36	20.806
BGIBMGA005553	blue	CK_hemocyte	gi|443429395|gb|AGC92680.1| sorting nexin-8-like protein [Heliconius erato]	1e-78	80.58	NA	NA	NA	NA	NA	NA	NA	NA	NA	NA	NA	NA	-5.39588	4.08392	8.22408e-13	8.07918e-11	23.701	30.915	11.132	0.632	1.539	9.593	1.491	9.955	7.669	2.111	3.15	6.16	0.469	1.238	0	2.167	0.449	0.621	3.097	2.846	1.456	13.004	5.737	0.537
BGIBMGA006188	greenyellow	CK_hemocyte	gi|512918883|ref|XP_004929241.1| PREDICTED: long-chain fatty acid transport protein 4-like [Bombyx mori]	3e-27	100	NA	NA	NA	NA	NA	NA	NA	NA	NA	NA	NA	NA	-5.02811	2.50089	0.00172628	0.02576	4.774	8.42	0	0	0	0	0	0	0	0	0	0	0	0	0	0	0	0	0	4.408	0	0	0	0
BGIBMGA000274	green	Toxin_cell	gi|290560913|ref|NP_001166672.1| cuticular protein RR-2 motif 90 precursor [Bombyx mori] gi|223671282|tpd|FAA00593.1| TPA: putative cuticle protein [Bombyx mori]	0	100	NA	NA	NA	NA	NA	NA	NA	NA	5.73931	4.61581	3.78869e-05	0.0136693	NA	NA	NA	NA	0.313	0.619	0.503	0	0.781	0.559	1.309	1.85	0.19	2.652	0.223	0.912	0	0.206	0.505	0.541	96.161	0.719	0.586	1.819	1.696	1.247	0.653	0.52
BGIBMGA000295	red	Toxin_hemocyte	gi|112983326|ref|NP_001037620.1| ras-related GTP-binding protein Rab3 [Bombyx mori] gi|102993253|gb|ABF71469.1| ras-related GTP-binding protein Rab3 [Bombyx mori]	4e-161	100	NA	NA	NA	NA	NA	NA	NA	NA	NA	NA	NA	NA	1.06094	7.37444	1.03468e-10	7.76201e-09	74.179	89.176	92.134	16.643	17.837	17.334	2.209	2.286	2.174	4.143	2.354	4.663	179.961	182.873	182.037	20.984	17.349	17.754	1.775	4.555	1.825	3.18	3.517	1.43
BGIBMGA000300	brown	CK_fatbody	gi|112983294|ref|NP_001037654.1| eIF2B-gamma protein [Bombyx mori] gi|110174985|gb|ABG54285.1| eIF2B-gamma protein [Bombyx mori]	0	93.66	-1.00163	5.93667	5.77866e-06	0.000121097	NA	NA	NA	NA	NA	NA	NA	NA	NA	NA	NA	NA	50.494	59.643	65.486	125.913	135.492	138.454	80.941	95.721	81.872	90.75	84.333	93.178	51.686	58.011	61.237	130.927	130.795	129.055	44.497	44.759	43.482	45.787	57.149	56.853
BGIBMGA014339	pink	CK_hemocyte,Toxin_midgut	gi|158292535|ref|XP_558472.3| AGAP005082-PA [Anopheles gambiae str. PEST] gi|157017037|gb|EAL40459.3| AGAP005082-PA [Anopheles gambiae str. PEST]	2e-25	75	NA	NA	NA	NA	2.85311	3.87211	0.00225615	0.0330518	NA	NA	NA	NA	-4.3298	6.91437	0.000279308	0.00534767	9.654	6.349	505.985	16.886	1.007	1.108	4.506	3.998	2.07	5.433	4.176	4.975	8.91	8.004	8.796	0.719	14.777	19.179	6.461	7.766	10.888	4.159	4.871	97.652
BGIBMGA000329	red	Toxin_fatbody	gi|223671184|tpd|FAA00544.1| TPA: putative cuticle protein [Bombyx mori]	1e-167	100	3.08023	6.11286	4.17454e-41	9.48981e-39	NA	NA	NA	NA	NA	NA	NA	NA	NA	NA	NA	NA	1.267	2.626	2.383	0.404	0.58	0.36	17.704	16.659	17.685	1.386	0.764	0.788	2.693	2.8	2.186	0.732	0.691	0.343	148.043	148.14	159.456	2.12	2.868	2.779
BGIBMGA000330	brown	Toxin_fatbody	gi|224177574|ref|NP_001128676.2| cuticular protein glycine-rich 21 precursor [Bombyx mori] gi|224038239|gb|ACH78251.2| epidermal protein [Bombyx mori]	0	100	2.15966	2.4975	0.00443669	0.0353616	NA	NA	NA	NA	NA	NA	NA	NA	NA	NA	NA	NA	0	0	0	0	0	0	0.811	1.434	2.597	0	0.314	0.301	0	0	0	0	0	0	9.873	4.637	7.152	0.365	0.35	0.367
BGIBMGA006971	blue	CK_hemocyte	gi|512932611|ref|XP_004932588.1| PREDICTED: LOW QUALITY PROTEIN: estrogen sulfotransferase-like [Bombyx mori]	0	85.28	NA	NA	NA	NA	NA	NA	NA	NA	NA	NA	NA	NA	-3.09495	3.91266	2.38675e-09	1.33078e-07	14.207	19.389	17.401	0.167	0.066	0.135	3.874	1.802	2.536	25.985	22.762	21.236	2.413	1.722	2.461	0.285	0.171	0.206	5.368	6.055	4.49	19.237	22.683	21.679
BGIBMGA000333	brown	Toxin_fatbody	gi|112984038|ref|NP_001036828.1| larval cuticle protein LCP-22 precursor [Bombyx mori] gi|3913392|sp|O02388.1|CU22_BOMMO RecName: Full=Larval cuticle protein LCP-22; Flags: Precursor gi|223671178|tpd|FAA00541.1| TPA: putative cuticle protein [Bombyx mori]	4e-119	100	3.50671	6.94536	1.2167e-60	4.38726e-58	NA	NA	NA	NA	NA	NA	NA	NA	NA	NA	NA	NA	0	0.303	0	0.95	1.869	1.463	19.946	21.211	29.921	2.298	0.061	1.252	0	0	0	2.155	2.503	2.78	274.946	298.086	255.158	3.482	4.176	4.212
BGIBMGA013924	pink	CK_hemocyte,CK_midgut	gi|512936495|ref|XP_004933533.1| PREDICTED: vanin-like protein 3-like [Bombyx mori]	0	100	NA	NA	NA	NA	-2.45867	8.619	2.10634e-66	4.99045e-63	NA	NA	NA	NA	-2.08901	3.58738	0.000117161	0.00249178	11.861	12.302	11.254	4.892	4.988	3.119	463.318	446.774	457.736	1008.87	1022.24	1012.52	2.436	2.999	2.722	4.808	4.642	5.17	350.876	351.71	338.878	195.216	173.566	178.88
BGIBMGA000338	black	CK_midgut	gi|290563462|ref|NP_001166719.1| cuticular protein RR-1 motif 32 precursor [Bombyx mori] gi|223671166|tpd|FAA00535.1| TPA: putative cuticle protein [Bombyx mori]	1e-103	100	NA	NA	NA	NA	-1.89478	3.38742	5.28559e-05	0.0014864	NA	NA	NA	NA	NA	NA	NA	NA	0	0	0	0	0	0	22.313	21.634	24.782	20.47	19.197	20.255	0	0	0	0	0	0	18.673	26.417	24.503	5.451	3.902	5.469
BGIBMGA000381	yellow	CK_fatbody	gi|114052643|ref|NP_001040262.1| nuclear migration protein nudC [Bombyx mori] gi|87248553|gb|ABD36329.1| nuclear migration protein nudC [Bombyx mori]	1e-99	84.92	-1.02174	6.38963	1.43765e-07	4.28306e-06	NA	NA	NA	NA	NA	NA	NA	NA	NA	NA	NA	NA	134.959	160.144	167.571	522.791	570.618	582.345	119.199	128.006	112.909	110.405	108.201	100.235	168.426	177.381	182.029	616.415	615.106	618.209	62.785	61.319	59.377	94.809	100.818	84.992
BGIBMGA000382	magenta	CK_fatbody	gi|114052643|ref|NP_001040262.1| nuclear migration protein nudC [Bombyx mori] gi|87248553|gb|ABD36329.1| nuclear migration protein nudC [Bombyx mori]	1e-100	98.66	-1.04118	5.92565	7.65983e-05	0.0011575	NA	NA	NA	NA	NA	NA	NA	NA	NA	NA	NA	NA	77.13	96.23	106.27	308.465	485.446	483.003	60.511	106.211	91.596	73.832	60.239	77.912	166.47	153.687	181.792	368.03	323.903	552.575	39.479	58.407	31.506	75.531	52.441	73.097
BGIBMGA000385	brown	CK_fatbody	gi|512930252|ref|XP_004932020.1| PREDICTED: transmembrane protease serine 9-like [Bombyx mori]	0	99.65	-1.81253	3.48239	0.000540605	0.00603964	NA	NA	NA	NA	NA	NA	NA	NA	NA	NA	NA	NA	1.885	2.219	1.368	0.962	0.748	0.679	11.92	12.534	18.122	8.648	8.844	12.596	1.128	1.524	1.644	0.188	0.681	0.316	3.01	5.057	6.094	13.918	9.083	5.714
BGIBMGA005182	blue	CK_hemocyte	gi|512908989|ref|XP_004926812.1| PREDICTED: alpha,alpha-trehalose-phosphate synthase [UDP-forming] A-like [Bombyx mori]	0	99.86	NA	NA	NA	NA	NA	NA	NA	NA	NA	NA	NA	NA	-1.95216	5.12235	4.87244e-12	4.32337e-10	42.396	39.007	41.353	27.222	21.512	23.77	101.836	93.189	101.731	1.09	0.898	0.935	10.293	9.522	11.62	24.402	24.306	21.289	131.931	134.642	134.478	0.958	0.653	1.502
BGIBMGA000397	yellow	Toxin_hemocyte	gi|114052432|ref|NP_001040127.1| RGS-GAIP interacting protein GIPC [Bombyx mori] gi|87248137|gb|ABD36121.1| RGS-GAIP interacting protein GIPC [Bombyx mori]	2e-160	99.56	NA	NA	NA	NA	NA	NA	NA	NA	NA	NA	NA	NA	1.31209	8.21581	2.61305e-17	4.22801e-15	117.297	141.33	149.522	49.32	50.371	49.565	25.051	27.59	26.401	141.464	143.051	136.343	322.028	361.73	353.101	46.14	49.977	50.059	29.585	32.824	33.439	176.872	191.071	189.954
BGIBMGA000404	turquoise	CK_fatbody	gi|512929869|ref|XP_004931929.1| PREDICTED: uncharacterized protein LOC101738500 isoform X1 [Bombyx mori] gi|512929873|ref|XP_004931930.1| PREDICTED: uncharacterized protein LOC101738500 isoform X2 [Bombyx mori]	8e-176	100	-1.11074	5.29095	1.11896e-06	2.79927e-05	NA	NA	NA	NA	NA	NA	NA	NA	NA	NA	NA	NA	58.634	55.614	66.798	134.709	149.891	141.406	49.753	60.01	54.61	68.468	66.478	65.791	57.997	56.432	50.995	145.124	141.425	144.34	24.48	26.856	24.987	46.944	41.527	45.757
BGIBMGA000411	turquoise	Toxin_fatbody	gi|512938360|ref|XP_004933987.1| PREDICTED: pancreatic triacylglycerol lipase-like, partial [Bombyx mori]	2e-54	74.81	2.36819	4.75893	2.42236e-17	2.34543e-15	NA	NA	NA	NA	NA	NA	NA	NA	NA	NA	NA	NA	10.572	10.99	11.292	1.913	2.585	1.893	8.933	9.705	10.82	0.284	0.323	0.468	17.809	17.875	21.376	2.068	2.503	1.925	56.407	55.292	47.45	0.745	0.199	0.392
BGIBMGA007228	blue	CK_hemocyte	gi|195963341|ref|NP_001124343.1| putative amino acid transporter [Bombyx mori] gi|189179669|dbj|BAG39453.1| putative amino acid transporter [Bombyx mori]	0	99.84	NA	NA	NA	NA	NA	NA	NA	NA	NA	NA	NA	NA	-1.82902	3.69534	0.000273875	0.00525586	10.783	12.941	13.903	0.048	0.081	0.181	1.18	0.92	1.115	1127.56	1164.09	1163.18	3.208	3.101	3.143	0.033	0.126	0.122	2.847	3.952	4.163	1598.36	1654.69	1619.39
BGIBMGA000425	magenta	CK_fatbody,CK_midgut	gi|512929977|ref|XP_004931956.1| PREDICTED: 1-acyl-sn-glycerol-3-phosphate acyltransferase gamma-like isoform X1 [Bombyx mori]	0	100	-1.6265	9.29653	4.0379e-36	8.12006e-34	-1.19854	8.8302	3.22993e-21	1.27542e-18	NA	NA	NA	NA	NA	NA	NA	NA	100.074	111.507	104.11	213.258	228.165	227.94	1056.36	1064.7	1056.27	965.604	980.883	970.716	80.941	73.649	80.389	209.106	216.345	213.6	355.093	352.637	355.299	407.94	422.177	420.671
BGIBMGA011266	pink	CK_hemocyte,Toxin_fatbody	gi|134925|sp|P09179.1|SSP1_BOMMO RecName: Full=Sex-specific storage-protein 1; Short=SP 1; AltName: Full=Methionine-rich storage protein; Flags: Precursor	0	99.87	1.73749	8.92313	2.72348e-36	5.69589e-34	NA	NA	NA	NA	NA	NA	NA	NA	-1.68189	4.87963	2.46642e-08	1.13072e-06	33.257	32.513	32.536	0.13	0	0	275.612	235.462	256.854	0.346	0.823	0.345	9.095	10.205	10.546	0	0.328	0.148	865.689	899.762	882.08	0.72	0.358	0.129
BGIBMGA000474	purple	CK_fatbody,CK_midgut	gi|512930181|ref|XP_004932003.1| PREDICTED: guanine nucleotide-binding protein-like 3 homolog [Bombyx mori]	0	100	-1.13566	6.20708	2.34928e-08	8.10772e-07	-1.17233	5.38244	1.10543e-08	7.99704e-07	NA	NA	NA	NA	NA	NA	NA	NA	60.288	58.855	58.431	370.871	378.171	362.751	107.105	109.353	107.824	80.76	89.222	80.707	74.231	81.021	82.598	420.468	395.288	393.756	52.829	53.185	44.653	36.87	34.154	38.025
BGIBMGA000481	turquoise	Toxin_fatbody	gi|512921696|ref|XP_004929937.1| PREDICTED: sulfhydryl oxidase 1-like [Bombyx mori]	0	99.12	9.37738	5.29433	9.41369e-07	2.3783e-05	NA	NA	NA	NA	NA	NA	NA	NA	NA	NA	NA	NA	0	0	0	0	0	0	0	0	0	0	0	0	0	0	0	0	0	0	0	0	329.762	0	0	0
BGIBMGA000496	yellow	CK_fatbody	gi|512921949|ref|XP_004929999.1| PREDICTED: peptide transporter family 1-like [Bombyx mori]	0	93.98	-1.01669	8.81248	8.36204e-15	6.57457e-13	NA	NA	NA	NA	NA	NA	NA	NA	NA	NA	NA	NA	26.677	25.963	24.177	0	0.154	0.078	666.107	681.954	665.895	344.572	348.758	355.308	17.825	17.545	21.062	0	1.687	0	340.142	340.99	346.592	356.909	369.215	372.146
BGIBMGA000504	green	Toxin_fatbody	gi|91079538|ref|XP_970846.1| PREDICTED: similar to ZK899.2 [Tribolium castaneum]	2e-108	49.7	1.24737	8.55662	4.32226e-20	4.65957e-18	NA	NA	NA	NA	NA	NA	NA	NA	NA	NA	NA	NA	0	0.402	0.836	0.114	0.328	0.364	243.96	257.315	261.691	220.881	197.422	204.617	0.229	0.232	0.538	0.746	18.029	0.134	619.436	621.477	632.956	165.865	162.862	150.494
BGIBMGA000505	purple	Toxin_fatbody	gi|108872502|gb|EAT36727.1| AAEL011213-PA [Aedes aegypti]	3e-18	55.07	1.23549	7.64531	1.44561e-15	1.20934e-13	NA	NA	NA	NA	NA	NA	NA	NA	NA	NA	NA	NA	0.23	0	0.066	0	0.106	0.207	132.344	141.087	135.571	103.856	103.98	111.414	1.045	0.59	0.325	0.371	11.446	0.058	328.208	352.031	313.582	99.534	85.923	93.227
BGIBMGA000529	green	CK_hemocyte	gi|112983290|ref|NP_001036959.1| neutral endopeptidase 24.11 [Bombyx mori] gi|13359138|dbj|BAB33300.1| neutral endopeptidase 24.11 [Bombyx mori]	0	99.21	NA	NA	NA	NA	NA	NA	NA	NA	NA	NA	NA	NA	-1.05533	5.18076	4.6595e-05	0.00113758	36.816	35.92	36.959	1.033	1.143	1.139	107.394	98.672	100.437	4.82	4.737	5.078	17.823	17.661	17.407	0.801	1.4	1.011	106.102	105.739	122.613	5.205	4.66	3.655
BGIBMGA000542	tan	CK_fatbody	gi|512921365|ref|XP_004929859.1| PREDICTED: ATPase family AAA domain-containing protein 3-like [Bombyx mori]	0	100	-1.19946	6.98342	5.12094e-12	3.24543e-10	NA	NA	NA	NA	NA	NA	NA	NA	NA	NA	NA	NA	55.72	50.453	52.699	193.77	207.359	207.391	183.63	199.617	189.136	216.994	196.056	187.987	57.502	58.109	60.942	221.861	208.246	206.544	86.846	84.184	86.581	102.064	101.495	100.479
BGIBMGA000551	green	CK_hemocyte	gi|512921311|ref|XP_004929846.1| PREDICTED: failed axon connections-like isoform X1 [Bombyx mori]	1e-63	98.08	NA	NA	NA	NA	NA	NA	NA	NA	NA	NA	NA	NA	-1.40514	5.96882	1.26981e-11	1.06923e-09	58.737	69.889	78.66	0.912	1.352	0.356	27.021	22.229	21.488	2.519	2.428	5.116	28.081	30.399	22.328	0	2.362	1.499	21.712	19.389	21.763	4.468	3.695	5.453
BGIBMGA000552	black	CK_hemocyte	gi|512921311|ref|XP_004929846.1| PREDICTED: failed axon connections-like isoform X1 [Bombyx mori]	0	98.91	NA	NA	NA	NA	NA	NA	NA	NA	NA	NA	NA	NA	-1.04667	6.03437	1.12231e-07	4.67742e-06	60.776	70.567	71.857	2.163	1.786	2.195	28.703	27.986	27.073	2.256	3.195	4.314	30.065	36.047	34.672	1.12	1.493	0.747	16.741	21.25	23.406	4.019	5.072	4.817
BGIBMGA011000	blue	CK_hemocyte	gi|512902901|ref|XP_004925488.1| PREDICTED: aminoacylase-1-like isoform X2 [Bombyx mori]	0	100	NA	NA	NA	NA	NA	NA	NA	NA	NA	NA	NA	NA	-1.57639	9.51811	2.01544e-28	6.92975e-26	791.554	941.858	912.71	0.345	0.208	0.305	2.672	2.563	3.294	0	0.084	0.035	300.101	294.323	308.254	0.069	0.151	0.123	2.266	2.53	2.666	0.226	0.5	0.941
BGIBMGA003854	blue	CK_hemocyte	gi|512900668|ref|XP_004924946.1| PREDICTED: proton-coupled amino acid transporter 4-like [Bombyx mori]	0	99.13	NA	NA	NA	NA	NA	NA	NA	NA	NA	NA	NA	NA	-1.54988	3.74693	0.0012692	0.0199115	10.327	15.673	11.14	0.132	0	0	4.901	3.913	4.485	9.554	7.603	10.003	4.467	3.343	4.459	0	0.434	0	9.064	9.677	7.644	13.978	12.463	10.738
BGIBMGA000583	black	Toxin_midgut	gi|512921165|ref|XP_004929813.1| PREDICTED: peptidoglycan-recognition protein 2-like [Bombyx mori]	0	100	NA	NA	NA	NA	1.33707	7.73389	5.77766e-21	2.02796e-18	NA	NA	NA	NA	NA	NA	NA	NA	5.068	6.548	5.317	0	0	0.11	7.662	6.53	7.44	184.493	187.475	189.798	6.141	5.956	5.426	0	0	0	5.176	6.107	4.836	482.657	474.816	441.561
BGIBMGA000589	green	Toxin_fatbody	gi|22474518|dbj|BAC10622.1| syntaxin-like protein [Bombyx mori]	1e-67	100	5.56829	2.29614	0.000284797	0.00352858	NA	NA	NA	NA	NA	NA	NA	NA	NA	NA	NA	NA	0	0	0	0	0	0	0	0	0	0	0	19.233	0	0	17.252	0	0	0	0	9.875	14.007	28.515	0	20.986
BGIBMGA000590	brown	Toxin_hemocyte	gi|169234710|ref|NP_001108476.1| pleiotrophin-like protein precursor [Bombyx mori] gi|18700463|dbj|BAB85199.1| Pleiotrophin-like protein [Bombyx mori] gi|22474517|dbj|BAC10621.1| Pleiotrophin-like protein [Bombyx mori]	6e-75	100	NA	NA	NA	NA	NA	NA	NA	NA	NA	NA	NA	NA	1.2415	4.14692	0.00224884	0.0316069	7.715	8.264	5.694	1.287	0.472	0.522	8.313	4.855	7.882	8.263	7.474	6.346	17.95	18.893	15.718	2.2	0.478	0.989	8.055	8.52	7.214	11.255	8.798	3.063
BGIBMGA000596	green	CK_fatbody	gi|114052663|ref|NP_001040488.1| vacuolar ATP synthase subunit H [Bombyx mori] gi|95103102|gb|ABF51492.1| vacuolar ATP synthase subunit H [Bombyx mori]	0	98.48	-7.34476	3.92034	2.8994e-07	8.23888e-06	NA	NA	NA	NA	NA	NA	NA	NA	NA	NA	NA	NA	0	0	0	0	0	0	35.283	41.014	0	485.06	546.075	0	0	0	0	0	0	0	0	0	0	0	568.144	0
BGIBMGA000612	turquoise	Toxin_fatbody	gi|531996938|gb|AGT62469.1| paramyosin, partial [Bicyclus anynana]	0	91.56	2.59012	7.99529	6.19995e-59	1.96463e-56	NA	NA	NA	NA	NA	NA	NA	NA	NA	NA	NA	NA	0.583	0.487	0.538	0.039	0	0	84.947	77.597	89.937	1637.22	1714.86	1765.44	0.416	0.787	0.528	0	0	0	518.458	535.128	518.606	2538.96	2371.37	2313.27
BGIBMGA000613	green	Toxin_fatbody	gi|221327579|gb|ACM17460.1| miniparamyosin [Bombyx mori]	0	100	2.60854	6.89423	4.17534e-44	1.01538e-41	NA	NA	NA	NA	NA	NA	NA	NA	NA	NA	NA	NA	0.135	0.332	0.205	0	0.072	0	39.315	41.979	36.146	750.969	800.652	781.536	0.228	0.3	0.118	0	0	0	248.501	244.837	249.301	1120.69	1036	1064.01
BGIBMGA000619	tan	CK_fatbody	gi|169234934|ref|NP_001108408.1| FK506-binding protein precursor [Bombyx mori]	1e-80	85.14	-1.07649	8.4251	9.73748e-13	6.53713e-11	NA	NA	NA	NA	NA	NA	NA	NA	NA	NA	NA	NA	98.336	105.703	99.297	23.164	59.21	26.459	558.396	462.294	532.053	89.248	80.207	72.414	144.478	132.888	241.517	16.139	21.834	23.34	273.172	247.381	240.42	67.505	41.303	33.597
BGIBMGA000622	green	Toxin_fatbody	gi|168823429|ref|NP_001108348.1| kettin protein [Bombyx mori]	0	99.52	1.18051	6.10722	2.2122e-09	9.71975e-08	NA	NA	NA	NA	NA	NA	NA	NA	NA	NA	NA	NA	0.631	0.589	0.583	296.133	298.011	296.573	47.015	49.382	47.927	932.398	972.93	948.785	0.788	0.67	0.475	315.958	322.51	315.11	114.959	111.791	110.788	1244.63	1260.92	1295.11
BGIBMGA000623	black	Toxin_fatbody	gi|18700459|dbj|BAB85197.1| Titin-like protein [Bombyx mori]	0	94.07	1.83947	3.57552	2.28273e-05	0.000406653	NA	NA	NA	NA	NA	NA	NA	NA	NA	NA	NA	NA	0	0.071	0	18.339	18.597	18.087	4.094	5.374	5.245	179.97	167.748	161.771	0.075	0.103	0.082	25.236	24.797	24.651	19.988	19.493	18.575	209.737	197.824	227.483
BGIBMGA011408	pink	CK_hemocyte	gi|512925226|ref|XP_004930787.1| PREDICTED: scavenger receptor class B member 1-like [Bombyx mori]	0	98.87	NA	NA	NA	NA	NA	NA	NA	NA	NA	NA	NA	NA	-1.52481	5.99214	7.96184e-14	8.42322e-12	68.561	78.634	70.212	0.267	0.129	0.581	19.831	22.855	18.269	1.024	0.236	2.104	27.81	25.551	23.178	0.049	0	0.121	10.793	15.318	11.843	0.484	0	0
BGIBMGA000657	turquoise	Toxin_midgut	gi|169234671|ref|NP_001108457.1| juvenile hormone resistence protein II [Bombyx mori] gi|165969953|gb|ABY76059.1| juvenile hormone resistence protein II [Bombyx mori]	0	100	NA	NA	NA	NA	1.02946	4.22192	0.000333699	0.00705907	NA	NA	NA	NA	NA	NA	NA	NA	20.552	21.649	22.555	0.813	0.753	0.877	17.933	17.503	14.487	16.677	18.544	17.747	22.074	22.277	22.04	1.037	0.719	0.759	22.074	22.745	21.683	34.494	36.051	33.66
BGIBMGA000681	brown	Toxin_fatbody	gi|290563372|ref|NP_001166628.1| cuticular protein tweedle motif 1 precursor [Bombyx mori] gi|223671400|tpd|FAA00652.1| TPA: putative cuticle protein [Bombyx mori]	0	100	2.51419	3.83283	1.22758e-09	5.6162e-08	NA	NA	NA	NA	NA	NA	NA	NA	NA	NA	NA	NA	1.503	1.057	2.129	0.1	0.098	0	4.645	5.267	3.195	3.084	3.248	2.459	2.652	1.946	1.287	0	0	0	31.112	26.343	21.515	3.292	1.692	2.467
BGIBMGA000688	magenta	Toxin_midgut	gi|512921405|ref|XP_004929869.1| PREDICTED: sodium/potassium/calcium exchanger 4-like [Bombyx mori]	0	92.46	NA	NA	NA	NA	1.08611	7.61754	2.484e-14	4.35942e-12	NA	NA	NA	NA	NA	NA	NA	NA	0	0.08	0	0.07	0.265	0.005	0.175	0	0.086	192.007	191.459	198.996	0	0	0	0	0.045	0.372	0.414	1.041	0.933	410.325	422.097	389.252
BGIBMGA000691	tan	CK_fatbody	gi|607353724|gb|EZA48439.1| Glutamine-rich protein [Cerapachys biroi]	3e-42	50.62	-1.14582	9.43967	1.654e-18	1.66307e-16	NA	NA	NA	NA	NA	NA	NA	NA	NA	NA	NA	NA	0.171	0.279	0.673	0.865	0.757	1.16	1032.42	1098.87	1080.52	2.152	1.59	1.558	0.22	0.248	0.062	0.617	0.836	0.685	497.233	475.757	528.82	0.341	1.128	1.493
BGIBMGA000701	red	CK_fatbody	gi|157674493|gb|ABV60342.1| putative catalase [Lutzomyia longipalpis]	0	72.82	-1.23447	4.24508	0.000323098	0.0039378	NA	NA	NA	NA	NA	NA	NA	NA	NA	NA	NA	NA	5.783	4.859	1.577	0.669	2.962	0.698	23.603	27.77	23.63	0.114	0	5.827	5.084	3.663	4.253	1.442	0	1.583	11.845	8.908	12.452	4.768	6.014	7.679
BGIBMGA003918	blue	CK_hemocyte	gi|379046472|gb|AFC87797.1| yellow-15 [Bombyx mori]	5e-171	99.2	NA	NA	NA	NA	NA	NA	NA	NA	NA	NA	NA	NA	-1.33181	7.22197	5.91772e-14	6.34196e-12	148.217	174.5	182.023	0	0.136	0.039	0.588	0.559	0.61	0.626	0.402	0.252	66.046	65.327	73.443	0	0.129	0.064	1.076	0.853	1.318	0.195	0	0.313
BGIBMGA000736	tan	Toxin_fatbody	gi|389609045|dbj|BAM18134.1| unknown unsecreted protein [Papilio xuthus]	5e-39	78.72	1.55812	5.35128	3.74932e-12	2.43519e-10	NA	NA	NA	NA	NA	NA	NA	NA	NA	NA	NA	NA	0	0	0	0	0	0	27.525	17.092	25.518	301.752	329.864	339.504	2.188	1.681	1.736	0.238	0	0	79.888	74.33	56.331	448.933	384.566	324.742
BGIBMGA000737	green	Toxin_fatbody	gi|389609045|dbj|BAM18134.1| unknown unsecreted protein [Papilio xuthus]	3e-18	83.02	1.53296	5.24829	4.25033e-12	2.74356e-10	NA	NA	NA	NA	NA	NA	NA	NA	NA	NA	NA	NA	0.91	0.849	0.882	0	0.409	0	19.727	22.913	23.356	346.174	321.165	296.426	0.59	1.875	3.252	0	0	0.3	60.053	72.411	66.778	384.238	386.666	396.004
BGIBMGA010216	blue	CK_hemocyte	gi|112983872|ref|NP_001036857.1| serine protease inhibitor 12 [Bombyx mori] gi|13359088|dbj|BAB33293.1| Serpin-like protein (SEP-LP) [Bombyx mori]	0	97.67	NA	NA	NA	NA	NA	NA	NA	NA	NA	NA	NA	NA	-1.29855	6.50363	2.86262e-07	1.10903e-05	66.221	105.71	125.925	0.338	0.194	0.282	165.223	192.71	122.688	3.403	1.761	2.409	53.936	36.336	33.654	0.112	0.108	0.273	234.648	228.455	208.739	1.793	2.156	5.173
BGIBMGA006518	blue	CK_hemocyte,Toxin_fatbody	gi|512924512|ref|XP_004930613.1| PREDICTED: peroxidase-like isoform X1 [Bombyx mori]	0	98.94	1.56528	7.10028	1.65547e-20	1.82224e-18	NA	NA	NA	NA	NA	NA	NA	NA	-1.28594	6.85032	1.33314e-12	1.29424e-10	129.545	128.913	127.032	563.741	594.212	598.288	79.766	75.831	82.68	42.591	43.998	46.185	55.073	52.445	52.915	616.793	639.26	629.227	239.221	256.774	233.705	48.071	45.709	49.102
BGIBMGA000794	green	CK_fatbody,Toxin_midgut	gi|512903812|ref|XP_004925709.1| PREDICTED: RNA-binding protein Nova-2-like [Bombyx mori]	5e-32	98.39	-1.09763	5.1447	1.67923e-05	0.00031245	1.62803	4.87277	0.00123436	0.0204511	NA	NA	NA	NA	NA	NA	NA	NA	67.913	69.177	59.924	20.305	6.302	15.58	45.615	58.677	42.98	15.743	23.39	23.124	46.565	48.835	47.456	12.452	11.779	14.026	14.289	30.509	28.273	9.598	85.217	93.719
BGIBMGA000829	red	CK_midgut	gi|512936911|ref|XP_004933635.1| PREDICTED: splicing factor 3B subunit 3-like isoform X1 [Bombyx mori]	0	100	NA	NA	NA	NA	-1.85927	7.76471	2.37854e-36	2.5046e-33	NA	NA	NA	NA	NA	NA	NA	NA	224.886	239.121	245.939	467.754	480.003	487.494	844.282	893.09	794.198	528.794	522.25	497.14	243.963	241.936	238.423	502.233	494.535	488.363	507.141	493.985	509.938	140.467	136.896	142.722
BGIBMGA000855	brown	Toxin_fatbody	gi|512914323|ref|XP_004928113.1| PREDICTED: microtubule-associated protein futsch-like [Bombyx mori]	0	99.38	1.13381	3.86242	0.00187908	0.0172963	NA	NA	NA	NA	NA	NA	NA	NA	NA	NA	NA	NA	23.84	16.04	18.597	4.425	3.762	3.421	8.245	9.739	9.722	10.202	10.624	9.515	17.707	20.165	19.489	5.01	6.05	4.656	21.264	20.747	20.724	17.371	17.821	17.926
BGIBMGA012425	blue	CK_hemocyte	gi|512903467|ref|XP_004925627.1| PREDICTED: serine protease snake-like [Bombyx mori]	2e-165	100	NA	NA	NA	NA	NA	NA	NA	NA	NA	NA	NA	NA	-1.26498	7.95801	8.43822e-10	5.2355e-08	224.084	242.814	369.08	0.366	0	0	0.603	1.772	0.532	1.439	0.36	0.336	118.437	121.063	116.104	0	0.644	0	2.51	0.779	2.473	1.047	0	0.58
BGIBMGA000896	purple	CK_fatbody	gi|512913554|ref|XP_004927925.1| PREDICTED: zinc transporter 8-like [Bombyx mori]	0	89.69	-1.6342	3.22148	0.00395382	0.0320256	NA	NA	NA	NA	NA	NA	NA	NA	NA	NA	NA	NA	0	0	0	0	0	0.005	10.313	13.101	10.778	162.789	155.783	181.879	0	0	0	0	0.211	0.107	4.066	3.436	4.108	216.006	225.655	221.365
BGIBMGA000901	turquoise	Toxin_hemocyte	gi|512913530|ref|XP_004927919.1| PREDICTED: neurogenic protein mastermind-like [Bombyx mori]	5e-39	76.67	NA	NA	NA	NA	NA	NA	NA	NA	NA	NA	NA	NA	1.69309	3.56089	0.00166796	0.0251168	2.912	5.307	2.543	2.712	2.429	1.668	4.266	3.579	7.275	8.608	8.63	8.328	12.357	10.087	12.276	2.313	1.08	2.103	4.486	3.997	3.567	4.978	6.994	5.878
BGIBMGA000929	magenta	Toxin_fatbody,Toxin_midgut	gi|512914123|ref|XP_004928063.1| PREDICTED: putative mediator of RNA polymerase II transcription subunit 26-like [Bombyx mori]	5e-76	100	2.05486	2.95168	0.000326986	0.0039713	1.14864	4.72394	0.00107529	0.0183282	NA	NA	NA	NA	NA	NA	NA	NA	10.969	8.878	0.507	0.024	0.087	0	0.96	0	6.255	22.741	28.97	19.832	3.901	0.419	24.024	0.276	2.441	0	10.664	10.246	12.968	27.657	43.622	84.538
BGIBMGA000977	salmon	CK_fatbody,CK_midgut	gi|114051211|ref|NP_001040384.1| mitochondrial single-stranded DNA-binding protein [Bombyx mori] gi|95104533|gb|ABF51293.1| mitochondrial single-stranded DNA-binding protein [Bombyx mori]	9e-77	98.25	-7.40525	3.97131	0.000117828	0.00168561	-6.89523	3.28483	0.000390724	0.00808491	NA	NA	NA	NA	NA	NA	NA	NA	0	0	0	0	436.279	417.677	0	79.929	0	0	0	62.482	0	0	0	445.824	0	414.068	0	0	0	0	0	0
BGIBMGA008214	pink	CK_hemocyte	gi|512909069|ref|XP_004926832.1| PREDICTED: LOW QUALITY PROTEIN: fumarate hydratase, mitochondrial-like [Bombyx mori]	0	86.3	NA	NA	NA	NA	NA	NA	NA	NA	NA	NA	NA	NA	-1.26489	10.8107	9.99117e-25	2.2902e-22	1971.8	2143.33	2018.58	43.947	43.589	42.059	112.177	95.936	105.281	118.075	132.362	142.867	871.891	894.563	829.578	35.844	40.869	39.537	117.783	118.912	114.617	157.818	148.309	135.369
BGIBMGA001008	black	Toxin_fatbody	gi|512913049|ref|XP_004927805.1| PREDICTED: monocarboxylate transporter 9-like [Bombyx mori]	0	100	1.02827	6.87361	4.07352e-09	1.69708e-07	NA	NA	NA	NA	NA	NA	NA	NA	NA	NA	NA	NA	0.164	0	0.23	0	0	0.024	90.926	90.332	81.91	771.104	730.848	706.558	0	0	0.326	0	0	0	203.877	170.581	180.507	514.079	531.471	564.377
BGIBMGA001012	green	CK_hemocyte	gi|512913968|ref|XP_004928024.1| PREDICTED: serine/threonine-protein kinase MST4-like [Bombyx mori]	0	94.39	NA	NA	NA	NA	NA	NA	NA	NA	NA	NA	NA	NA	-2.42723	3.64213	8.46203e-06	0.000240788	11.485	12.465	14.268	0.243	0.124	0.401	0.586	0.559	0.829	0.62	0.597	0.42	2.502	2.018	2.239	0.257	0.185	0.268	0.549	0.466	1.383	0.524	0.834	1.15
BGIBMGA001013	black	CK_hemocyte	gi|512913012|ref|XP_004927796.1| PREDICTED: testis-specific serine/threonine-protein kinase 1-like [Bombyx mori]	0	100	NA	NA	NA	NA	NA	NA	NA	NA	NA	NA	NA	NA	-2.66907	5.34353	2.07203e-21	4.17034e-19	47.287	56.191	53.619	0	0.789	0.245	1.006	0.792	1.151	0.955	0.68	1.021	8.951	7.274	7.95	0	0.205	0.496	1.563	1.317	0.651	0.343	1.152	0.537
BGIBMGA009951	pink	CK_hemocyte	gi|169234690|ref|NP_001108466.1| glutathione S-transferase epsilon 3 [Bombyx mori] gi|154000790|gb|ABS56976.1| glutathione S-transferase 10 [Bombyx mori]	5e-144	100	NA	NA	NA	NA	NA	NA	NA	NA	NA	NA	NA	NA	-1.25346	3.8473	0.00382712	0.0495006	16.233	11.441	12.993	0	0.373	0.251	0	0.027	0	1.504	2.2	1.595	6.354	5.413	5.006	0.338	0.814	0	1.547	0	0.289	1.229	0	2.463
BGIBMGA006251	pink	CK_hemocyte	gi|512903757|ref|XP_004925696.1| PREDICTED: SCO-spondin-like [Bombyx mori]	7e-32	98.44	NA	NA	NA	NA	NA	NA	NA	NA	NA	NA	NA	NA	-1.20591	4.04585	0.00225217	0.0316069	19.14	14.852	13.774	0	0	0	1.181	1.62	0	0	0	1.193	7.591	4.942	8.74	0	0.841	0	1.355	0	3.599	0	0	0
BGIBMGA001056	yellow	Toxin_hemocyte,Toxin_fatbody	gi|289177022|ref|NP_001165929.1| adipose triglyceride lipase brummer [Bombyx mori] gi|285028547|gb|ADC34595.1| adipose triglyceride lipase brummer [Bombyx mori]	0	100	1.82632	6.70412	4.90571e-21	5.63725e-19	NA	NA	NA	NA	NA	NA	NA	NA	2.30298	8.47883	4.28856e-36	2.35928e-33	97.3	92.319	100.147	21.201	28.845	32.844	49.229	52.254	57.966	356.067	417.34	391.846	584.963	421.916	446.084	31.551	35.109	27.849	177.405	222.581	183.967	336.346	345.424	383.057
BGIBMGA001057	brown	Toxin_hemocyte,Toxin_fatbody	gi|338858968|gb|AEJ33048.1| adipose triglyceride lipase [Manduca sexta]	7e-24	87.04	1.93539	5.0353	8.4129e-12	5.20554e-10	NA	NA	NA	NA	NA	NA	NA	NA	2.30235	7.12165	2.90011e-23	6.46804e-21	28.734	44.427	37.887	9.831	9.386	11.724	24.142	6.952	15.105	97.245	136.472	129.232	159.129	240.052	163.139	12.648	18.084	11.553	47.745	60.844	77.912	116.531	93.385	103.966
BGIBMGA011391	pink	CK_hemocyte	gi|512925478|ref|XP_004930849.1| PREDICTED: P protein-like [Bombyx mori]	0	84.21	NA	NA	NA	NA	NA	NA	NA	NA	NA	NA	NA	NA	-1.18756	4.60283	0.000191493	0.00380771	28.507	21.908	23.481	4.421	4.277	4.893	6.738	5.468	6.128	3.467	4.222	3.601	10.682	11.276	10.255	3.684	4.915	4.761	7.393	5.403	4.887	7.141	5.959	4.544
BGIBMGA001094	red	Toxin_midgut	gi|357621565|gb|EHJ73357.1| alpha amylase [Danaus plexippus]	7e-21	75	NA	NA	NA	NA	1.38754	5.13994	1.13422e-10	1.23552e-08	NA	NA	NA	NA	NA	NA	NA	NA	0	0	0	2.931	1.994	1.432	0	0.286	0.219	36.632	29.245	23.262	0	0	0	0.939	2.656	1.424	0	0.701	0	68.567	78.112	78.628
BGIBMGA008285	pink	CK_hemocyte	gi|512905553|ref|XP_004925973.1| PREDICTED: uncharacterized protein LOC101740406, partial [Bombyx mori]	1e-103	100	NA	NA	NA	NA	NA	NA	NA	NA	NA	NA	NA	NA	-1.18093	4.34066	0.000926058	0.014984	19.396	22.196	17.875	0.188	0.251	0.371	12.963	17.423	15.11	4.064	5.811	5.357	10.741	10.589	4.369	0.577	1.085	0.556	14.684	11.749	11.562	6.654	2.584	4.361
BGIBMGA001146	green	Toxin_fatbody	gi|512913057|ref|XP_004927807.1| PREDICTED: monocarboxylate transporter 7-like [Bombyx mori]	0	99.43	3.31668	3.60516	2.12141e-11	1.21888e-09	NA	NA	NA	NA	NA	NA	NA	NA	NA	NA	NA	NA	0.458	0	0	0.282	0.351	0.093	2.866	1.865	1.535	26.163	22.759	17.205	0	0.138	0	0.588	0.372	0.188	24.71	24.969	22.025	27.625	26.851	24.67
BGIBMGA001147	red	CK_midgut	gi|512913984|ref|XP_004928028.1| PREDICTED: facilitated trehalose transporter Tret1-like [Bombyx mori]	0	100	NA	NA	NA	NA	-1.08125	6.89722	1.21297e-11	1.51254e-09	NA	NA	NA	NA	NA	NA	NA	NA	0	0	0.148	0	0.422	0	220.353	243.046	218.843	238.444	246.72	245.18	0	0	0	0	0.585	0	231.421	234.794	237.984	109.469	117.353	113.831
BGIBMGA001150	magenta	Toxin_fatbody	gi|512913070|ref|XP_004927808.1| PREDICTED: proton-coupled amino acid transporter 1-like [Bombyx mori]	3e-177	100	3.8847	2.40102	1.53269e-05	0.000288619	NA	NA	NA	NA	NA	NA	NA	NA	NA	NA	NA	NA	0	0.348	0	0	0.15	0	0.477	0.67	0.286	4.337	3.245	3.18	0.348	0	0	0	0	0	7.1	6.424	10.262	3.033	3.69	3.216
BGIBMGA001151	black	Toxin_fatbody	gi|512913074|ref|XP_004927809.1| PREDICTED: proton-coupled amino acid transporter 4-like [Bombyx mori]	0	100	3.77917	4.83394	1.43879e-32	2.50756e-30	NA	NA	NA	NA	NA	NA	NA	NA	NA	NA	NA	NA	0	0	0	0	0	0	4.93	3.228	5.448	7.706	10.733	12.381	0	0	0	0	0	0	63.482	64.781	64.145	7.007	7.54	10.23
BGIBMGA007628	blue	CK_hemocyte	gi|512916635|ref|XP_004928687.1| PREDICTED: uncharacterized protein LOC101736984 isoform X3 [Bombyx mori]	5e-66	100	NA	NA	NA	NA	NA	NA	NA	NA	NA	NA	NA	NA	-1.1717	9.35925	2.91406e-15	3.87852e-13	673.436	794.273	723.19	0.881	0	0.477	34.197	29.18	40.582	10.879	7.562	13.776	359.146	294.237	336.018	0.555	0.493	0.454	25.238	10.142	17.904	5.772	4.986	4.393
BGIBMGA001201	green	Toxin_fatbody	gi|114052470|ref|NP_001040476.1| muscular protein 20 [Bombyx mori] gi|95103052|gb|ABF51467.1| muscular protein 20 [Bombyx mori]	3e-131	100	2.79634	6.61444	2.37422e-43	5.51715e-41	NA	NA	NA	NA	NA	NA	NA	NA	NA	NA	NA	NA	1.555	1.002	1.386	0	0.378	0.144	28.487	28.049	29.52	1512.08	1701.32	1687.21	3.243	1.376	1.119	0	0.377	0.155	199.027	219.222	207.238	1648.19	1680.12	1651.73
BGIBMGA001202	brown	Toxin_fatbody	gi|160333386|ref|NP_001103762.1| muscle LIM protein isoform 1 [Bombyx mori] gi|87248175|gb|ABD36140.1| muscle LIM protein [Bombyx mori]	0	95.36	1.40822	6.74438	1.41096e-15	1.18987e-13	NA	NA	NA	NA	NA	NA	NA	NA	NA	NA	NA	NA	1.298	1.075	1.429	10.01	9.502	8.303	69.035	62.515	71.064	969.424	1008.8	1038.07	0.809	0.635	0.565	9.298	7.342	9.225	191.265	187.565	175.261	1444.33	1546.69	1379.52
BGIBMGA001235	turquoise	Toxin_hemocyte	gi|223890164|ref|NP_001138797.1| GTP cyclohydrolase I isoform B [Bombyx mori] gi|220983695|dbj|BAH11150.1| GTP cyclohydrolase I isoform B [Bombyx mori]	1e-150	100	NA	NA	NA	NA	NA	NA	NA	NA	NA	NA	NA	NA	4.14587	4.91025	8.87203e-26	2.28788e-23	2.5	2.286	2.574	0.959	1.287	1.873	708.981	623.879	654.584	1.997	3.053	1.987	43.149	43.707	41.731	1.593	1.796	0.734	377.953	348.596	365.185	2.126	1.785	3.14
BGIBMGA001237	turquoise	Toxin_fatbody	gi|512913498|ref|XP_004927911.1| PREDICTED: branched-chain-amino-acid aminotransferase, cytosolic-like [Bombyx mori]	0	100	1.19105	6.62839	2.18184e-11	1.24675e-09	NA	NA	NA	NA	NA	NA	NA	NA	NA	NA	NA	NA	11.125	9.039	9.96	11.01	13.984	13.212	69.186	68.192	68.1	96.182	101.78	115.841	14.096	13.656	14.227	11.55	10.373	12.898	154.519	167.196	165.455	91.354	110.555	87.62
BGIBMGA001254	black	Toxin_hemocyte	gi|512914201|ref|XP_004928083.1| PREDICTED: LOW QUALITY PROTEIN: adenylate cyclase type 9-like [Bombyx mori]	0	90.71	NA	NA	NA	NA	NA	NA	NA	NA	NA	NA	NA	NA	1.10091	8.03134	3.92097e-14	4.55716e-12	140.879	129.356	130.5	43.686	44.58	44.96	118.109	128.123	120.657	35.697	37.854	36.849	288.094	297.96	285.41	44.132	46.172	43.87	126.648	118.382	128.914	60.45	60.147	57.216
BGIBMGA001272	black	Toxin_hemocyte	gi|512914285|ref|XP_004928104.1| PREDICTED: venom dipeptidyl peptidase 4-like [Bombyx mori]	0	99.18	NA	NA	NA	NA	NA	NA	NA	NA	NA	NA	NA	NA	2.07893	6.74131	4.76198e-26	1.30986e-23	32.337	34.286	29.928	0.131	0.263	0.469	186.148	182.576	190.801	966.182	1012.25	1051.49	141.892	136.442	138.665	0.224	0.527	0.277	191.856	189.551	180.511	1467.4	1438.25	1446.71
BGIBMGA001276	black	CK_hemocyte	gi|512913741|ref|XP_004927968.1| PREDICTED: cytochrome P450 CYP12A2-like isoform X1 [Bombyx mori] gi|433339062|dbj|BAM73885.1| cytochrome P450 [Bombyx mori] gi|433339071|dbj|BAM73888.1| cytochrome P450 [Bombyx mori]	0	100	NA	NA	NA	NA	NA	NA	NA	NA	NA	NA	NA	NA	-1.23572	3.91611	0.00320871	0.0427758	15.943	13.291	12.828	0.105	0.108	0	18.773	25.067	21.177	144.765	163.681	156.799	6.512	5.229	6.344	0.122	0.118	0	31.418	32.876	32.917	224.514	235.199	227.832
BGIBMGA001277	turquoise	CK_hemocyte	gi|512914289|ref|XP_004928105.1| PREDICTED: cytochrome P450 CYP12A2-like [Bombyx mori]	0	87.65	NA	NA	NA	NA	NA	NA	NA	NA	NA	NA	NA	NA	-1.00781	4.78446	0.000837066	0.0139545	25.683	26.551	26.769	0.023	0	0.141	33.631	40.107	38.121	124.38	122.393	113.413	12.769	14.664	12.889	0.039	0	0	36.602	33.158	35.201	128.957	121.626	137.213
BGIBMGA010876	blue	CK_hemocyte	gi|525342911|ref|NP_001266303.1| low molecular mass 30 kDa lipoprotein 19G1-like [Bombyx mori] gi|379046498|gb|AFC87810.1| 30K protein 12 [Bombyx mori]	0	100	NA	NA	NA	NA	NA	NA	NA	NA	NA	NA	NA	NA	-1.14455	5.66786	3.41454e-07	1.31055e-05	53.551	58.813	47.15	0.828	0.662	0	0	0	0	0	0	0.619	33.397	21.328	17.997	0.903	0	0.825	0	0	0	0	0	0.752
BGIBMGA003494	blue	CK_hemocyte	gi|512922620|ref|XP_004930160.1| PREDICTED: mediator of RNA polymerase II transcription subunit 26-like [Bombyx mori]	0	100	NA	NA	NA	NA	NA	NA	NA	NA	NA	NA	NA	NA	-1.13756	4.42062	0.00093232	0.0150264	16.305	19.444	25.51	0	0.913	1.523	5.927	1.497	1.286	6.61	11.652	3.118	9.008	14.042	5.276	2.866	2.19	2.685	3.313	4.6	3.301	9.104	7.014	11.975
BGIBMGA001337	cyan	CK_midgut	gi|379699038|ref|NP_001243993.1| UDP-glycosyltransferase UGT41A1 precursor [Bombyx mori] gi|363896182|gb|AEW43175.1| UDP-glycosyltransferase UGT41A1 [Bombyx mori]	3e-83	82.93	NA	NA	NA	NA	-1.58172	6.08066	5.98843e-15	1.18234e-12	NA	NA	NA	NA	NA	NA	NA	NA	2.444	3.165	2.634	0.344	0	0	86.726	68.474	79.651	129.605	155.578	158.901	4.21	3.556	2.807	0.139	0.136	0	83.512	80.421	74.886	50.947	47.291	48.98
BGIBMGA001338	green	CK_midgut	gi|379699038|ref|NP_001243993.1| UDP-glycosyltransferase UGT41A1 precursor [Bombyx mori] gi|363896182|gb|AEW43175.1| UDP-glycosyltransferase UGT41A1 [Bombyx mori]	0	100	NA	NA	NA	NA	-1.7637	6.99123	2.37858e-26	1.61013e-23	NA	NA	NA	NA	NA	NA	NA	NA	3.395	5.075	3.741	0.712	0.302	1.493	149.948	135.747	146.039	287.812	301.129	294.084	5.898	5.273	7.001	0.104	0.62	0.201	143.414	127.953	130.477	84.092	93.179	78.939
BGIBMGA001347	turquoise	Toxin_fatbody	gi|13383195|dbj|BAB39500.1| fibroin P25 [Bombyx mandarina]	7e-160	98.18	2.19794	9.161	1.33037e-56	3.97475e-54	NA	NA	NA	NA	NA	NA	NA	NA	NA	NA	NA	NA	0.216	0.089	0.248	0.251	0.432	1.21	223.85	242.638	236.46	9.397	0.281	0.181	1.253	0.117	1.529	1.017	42.798	0.066	1106.37	1145.28	1082.36	0.618	1.241	0.299
BGIBMGA005992	greenyellow	CK_hemocyte	gi|512918771|ref|XP_004929213.1| PREDICTED: transmembrane protein 18-like [Bombyx mori]	5e-69	84	NA	NA	NA	NA	NA	NA	NA	NA	NA	NA	NA	NA	-1.08862	5.96139	2.27564e-08	1.05497e-06	62.612	68.866	63.612	26.312	28.364	27.941	21.517	26.397	19.031	31.046	26.742	32.491	32.833	29.677	30.174	30.105	26.724	29.63	24.516	25.844	23.371	25.736	28.256	24.234
BGIBMGA007524	pink	CK_hemocyte	gi|158288521|ref|XP_310395.6| AGAP003834-PA [Anopheles gambiae str. PEST] gi|157019122|gb|EAA05949.4| AGAP003834-PA [Anopheles gambiae str. PEST]	1e-26	30.58	NA	NA	NA	NA	NA	NA	NA	NA	NA	NA	NA	NA	-1.0805	5.39064	5.35224e-06	0.000158873	46.284	39.501	43.755	22.828	50.851	28.516	0.463	1.354	1.307	2.538	2.343	1.339	19.024	21.544	21.657	23.797	24.253	23.787	0.856	1.409	3.647	1.761	1.486	1.164
BGIBMGA001461	black	CK_hemocyte	gi|512920465|ref|XP_004929639.1| PREDICTED: alpha-tocopherol transfer protein-like [Bombyx mori]	3e-177	97.66	NA	NA	NA	NA	NA	NA	NA	NA	NA	NA	NA	NA	-1.06306	5.27032	2.01312e-05	0.000532444	36.859	39.741	40.225	39.637	41.81	46.204	53.688	45.704	49.262	115.896	123.201	109.992	19.549	19.188	18.102	43.278	42.536	42.915	38.455	35.124	36.156	120.186	108.076	119.685
BGIBMGA001490	red	CK_fatbody,CK_midgut	gi|112983564|ref|NP_001037356.1| 45 kDa immunophilin FKBP45 [Bombyx mori] gi|68160236|gb|AAY86706.1| 45 kDa immunophilin FKBP45 [Bombyx mori]	0	100	-1.57106	9.54934	1.80911e-35	3.56941e-33	-1.14975	8.53719	2.84999e-17	7.10773e-15	NA	NA	NA	NA	NA	NA	NA	NA	287.625	387.251	373.457	1494.99	1537.39	1543.57	1245.52	1252.83	1261.86	841.541	786.176	727.818	488.775	590.089	517.34	1598.42	1519.95	1499.8	447.717	433.206	426.684	337.599	349.917	355.953
BGIBMGA001376	blue	CK_hemocyte	gi|512908901|ref|XP_004926791.1| PREDICTED: protein quiver-like [Bombyx mori]	1e-78	96.61	NA	NA	NA	NA	NA	NA	NA	NA	NA	NA	NA	NA	-1.05535	5.18133	4.6595e-05	0.00113758	38.003	34.394	37.258	1.602	1.661	1.946	3.406	2.159	4.043	3.071	2.83	2.118	17.921	19.319	16.732	2.374	1.608	2.634	5.302	3.272	4.319	4.288	1.128	2.086
BGIBMGA001498	yellow	Toxin_fatbody	gi|512920408|ref|XP_004929625.1| PREDICTED: synaptic vesicle glycoprotein 2B-like isoform X1 [Bombyx mori] gi|512920412|ref|XP_004929626.1| PREDICTED: synaptic vesicle glycoprotein 2B-like isoform X2 [Bombyx mori]	0	100	1.65158	9.17515	3.63564e-36	7.45448e-34	NA	NA	NA	NA	NA	NA	NA	NA	NA	NA	NA	NA	0	0.123	0	0.086	0.034	0	329.041	301.542	324.829	54.007	57.635	52.73	0	0.13	0	0	0.225	0.079	1057.73	1001.21	1043.9	45.315	43.843	35.567
BGIBMGA001504	turquoise	CK_fatbody	gi|512920899|ref|XP_004929748.1| PREDICTED: chondroitin proteoglycan 2-like, partial [Bombyx mori]	0	100	-1.382	3.66329	0.00220926	0.0198103	NA	NA	NA	NA	NA	NA	NA	NA	NA	NA	NA	NA	0	0	0.194	0	0	0	18.849	14.542	15.669	11473	12072.1	11891.8	0	0	0	0.109	0.092	0.067	5.421	7.702	5.665	9403.66	9641.08	9274.35
BGIBMGA003915	blue	CK_hemocyte	gi|512901258|ref|XP_004925091.1| PREDICTED: monocarboxylate transporter 14-like, partial [Bombyx mori]	0	48.16	NA	NA	NA	NA	NA	NA	NA	NA	NA	NA	NA	NA	-1.05037	6.72154	1.44853e-08	6.99021e-07	109.116	113.052	113.042	10.625	10.605	11.596	21.569	24.809	21.592	25.105	25.43	23.965	54.578	57.37	51.793	10.794	10.191	11.514	45.115	42.295	41.554	37.038	34.334	33.015
BGIBMGA014026	pink	CK_hemocyte	gi|512908391|ref|XP_004926670.1| PREDICTED: LOW QUALITY PROTEIN: major royal jelly protein 1, partial [Bombyx mori]	2e-63	97.17	NA	NA	NA	NA	NA	NA	NA	NA	NA	NA	NA	NA	-1.05024	5.41912	1.86811e-05	0.000500508	37.824	40.314	51.557	0	0.301	0	0.777	0.314	0.14	0.302	0	0	25.785	17.051	21.205	0	0.169	0	0	0.07	0.519	0	0.563	0
BGIBMGA003631	blue	CK_hemocyte	gi|512922131|ref|XP_004930045.1| PREDICTED: trans-1,2-dihydrobenzene-1,2-diol dehydrogenase-like isoform X1 [Bombyx mori] gi|512922135|ref|XP_004930046.1| PREDICTED: trans-1,2-dihydrobenzene-1,2-diol dehydrogenase-like isoform X2 [Bombyx mori]	0	90.75	NA	NA	NA	NA	NA	NA	NA	NA	NA	NA	NA	NA	-1.04503	4.84303	0.000515754	0.00905532	23.559	27.848	32.063	40.017	40.604	37.456	6.567	6.473	7.305	170.841	174.415	163.275	11.352	16.682	12.877	39.463	41.289	35.979	15.094	12.336	14.121	187.168	194.382	185.477
BGIBMGA006921	blue	CK_hemocyte	gi|307196977|gb|EFN78352.1| PIH1 domain-containing protein 1 [Harpegnathos saltator]	5e-123	33.67	NA	NA	NA	NA	NA	NA	NA	NA	NA	NA	NA	NA	-1.03005	6.07286	6.61653e-08	2.87367e-06	70.171	66.032	73.225	75.461	75.452	75.308	40.85	51.507	43.959	81.134	79.332	73.986	32.093	35.7	36.285	80.571	76.352	76.237	31.904	34.273	34.143	84.952	83.685	89.893
BGIBMGA001587	brown	Toxin_fatbody	gi|114052020|ref|NP_001040445.1| tropomyosin-1 [Bombyx mori] gi|121958906|sp|Q1HPU0.1|TPM1_BOMMO RecName: Full=Tropomyosin-1 gi|95102920|gb|ABF51401.1| tropomyosin 1 [Bombyx mori]	0	100	3.02352	6.48542	1.86347e-43	4.42869e-41	NA	NA	NA	NA	NA	NA	NA	NA	NA	NA	NA	NA	0.145	0	0.161	0	0	0	16.061	24.338	29.265	453.139	492.546	516.509	0.263	0.309	0.538	0	0	0	201.792	195.13	185.775	660.572	738.829	684.654
BGIBMGA001600	turquoise	CK_fatbody	gi|512920828|ref|XP_004929730.1| PREDICTED: organic cation transporter protein-like [Bombyx mori]	0	99.11	-1.43884	6.59787	8.21938e-14	6.05282e-12	NA	NA	NA	NA	NA	NA	NA	NA	NA	NA	NA	NA	5.506	5.359	5.057	0.49	0.435	0.253	141.856	159.358	151.599	7.041	6.601	6.376	3.329	3.21	2.862	0.572	0.315	0.307	59.321	57.555	53.457	4.275	3.806	5.009
BGIBMGA001605	purple	CK_midgut	no hints			NA	NA	NA	NA	-6.37382	2.87613	0.00101969	0.0176344	NA	NA	NA	NA	NA	NA	NA	NA	65.779	51.146	0	0	0	0	46.883	0	0	0	0	43.18	54.777	0	0	0	0	0	27.691	32.867	0	0	0	0
BGIBMGA001630	brown	CK_midgut	gi|512885950|ref|XP_004921681.1| PREDICTED: juvenile hormone esterase-like [Bombyx mori]	5e-157	49.89	NA	NA	NA	NA	-1.87933	4.61197	1.01719e-11	1.30269e-09	NA	NA	NA	NA	NA	NA	NA	NA	5.154	3.211	3.204	21.499	17.782	21.613	11.212	7.175	5.765	50.433	56.009	51.137	2.734	2.742	3.201	20.226	22.297	20.898	8.888	7.697	7.946	14.452	13.564	14.05
BGIBMGA012371	blue	Toxin_hemocyte,Toxin_fatbody	gi|512902712|ref|XP_004925441.1| PREDICTED: zinc transporter ZIP3-like [Bombyx mori]	0	100	1.09577	4.70094	3.82964e-05	0.000631307	NA	NA	NA	NA	NA	NA	NA	NA	1.02667	9.41782	4.82706e-14	5.39556e-12	330.455	392.821	361.866	0.758	1.367	0.551	20.151	14.81	18.921	99.054	101.338	99.573	748.952	726.749	777.624	0.408	0.989	1.028	40.577	38.523	41.355	185.446	181.085	185.402
BGIBMGA001707	turquoise	Toxin_fatbody	gi|512888853|ref|XP_004922155.1| PREDICTED: tubulin beta-1 chain-like [Bombyx mori]	0	90.69	1.59817	3.72753	6.63334e-05	0.00102763	NA	NA	NA	NA	NA	NA	NA	NA	NA	NA	NA	NA	0.431	0.543	0	16.705	16.903	14.487	8.229	5.806	6.845	42.901	42.432	47.409	0.188	0.372	0.333	12.926	13.983	13.56	20.406	21.369	21.123	52.449	55.243	46.313
BGIBMGA001732	turquoise	Toxin_fatbody	gi|512888944|ref|XP_004922170.1| PREDICTED: BCL2/adenovirus E1B 19 kDa protein-interacting protein 3-like [Bombyx mori]	9e-112	99.38	1.07235	5.8797	3.63633e-07	1.014e-05	NA	NA	NA	NA	NA	NA	NA	NA	NA	NA	NA	NA	198.383	209.434	202.824	30.512	35.237	29.528	52.714	35.332	41.221	107.987	108.605	117.325	220.526	251.628	223.283	35.01	37.216	30.687	95.708	85.364	98.112	157.738	146.9	145.702
BGIBMGA001735	magenta	CK_fatbody	gi|512888968|ref|XP_004922174.1| PREDICTED: titin-like [Bombyx mori]	0	100	-1.03347	7.18657	3.24579e-10	1.61625e-08	NA	NA	NA	NA	NA	NA	NA	NA	NA	NA	NA	NA	125.233	136.209	133.462	192.638	188.488	191.339	209.825	209.244	221.25	369.103	368.424	365.482	164.818	175.596	175.422	198.401	210.335	195.358	109.606	105.28	107.13	234.619	227.737	238.403
BGIBMGA001738	red	CK_fatbody	gi|512888995|ref|XP_004922179.1| PREDICTED: zinc finger protein Xfin-like isoform X1 [Bombyx mori] gi|512889001|ref|XP_004922180.1| PREDICTED: zinc finger protein Xfin-like isoform X2 [Bombyx mori]	0	100	-1.02357	4.27452	0.00185158	0.0171345	NA	NA	NA	NA	NA	NA	NA	NA	NA	NA	NA	NA	30.936	31.178	30.632	36.325	34.494	34.703	27.865	23.382	23.583	28.88	25.556	21.819	24.973	27.456	26.138	32.06	32.379	34.665	13.003	12.224	12.933	16.513	12.747	15.012
BGIBMGA000416	greenyellow	Toxin_hemocyte	gi|512929913|ref|XP_004931940.1| PREDICTED: protein FAM107B-like [Bombyx mori]	3e-88	100	NA	NA	NA	NA	NA	NA	NA	NA	NA	NA	NA	NA	1.03816	6.9919	3.79713e-09	1.97069e-07	62.819	60.932	72.82	42.813	48.446	47.781	29.501	21.761	22.631	52.613	49.427	51.521	141.951	140.255	132.166	49.749	49.244	54.338	37.099	37.647	41.729	54.945	60.07	58.595
BGIBMGA005300	blue	Toxin_hemocyte,Toxin_midgut	gi|512931130|ref|XP_004932233.1| PREDICTED: gamma-glutamyltranspeptidase 1-like [Bombyx mori]	0	100	NA	NA	NA	NA	1.39238	3.14485	0.00247655	0.0355611	NA	NA	NA	NA	1.08199	4.6989	0.000361623	0.0065585	11.248	12.545	12.813	47.357	53.49	51.948	2.593	2.437	2.511	4.941	7.546	5.653	25.714	25.904	25.636	47.729	51.467	48.979	5.105	3.329	4.34	16.389	16.655	14.773
BGIBMGA001821	red	CK_fatbody	gi|512889407|ref|XP_004922270.1| PREDICTED: mucin-19-like [Bombyx mori]	8e-61	78.52	-3.34049	2.53369	0.00131624	0.0128996	NA	NA	NA	NA	NA	NA	NA	NA	NA	NA	NA	NA	0	0	0	0	0	0	6.604	4.942	7.287	1.147	0	0	0	0	0	0.369	6.337	0	0	0.121	1.439	0	0	0.502
BGIBMGA001827	turquoise	Toxin_fatbody	gi|512889755|ref|XP_004922364.1| PREDICTED: probable RNA-binding protein orb2-like [Bombyx mori]	0	99.09	1.08016	3.78565	0.00519786	0.0405544	NA	NA	NA	NA	NA	NA	NA	NA	NA	NA	NA	NA	40.992	41.201	32.383	0.372	0.129	0.32	9.761	7.138	8.292	31.204	37.393	34.431	20.835	22.2	23.997	0.166	0.865	0.173	17.017	19.797	21.394	34.786	31.648	29.604
BGIBMGA001837	turquoise	CK_fatbody	no hints			-8.53382	4.97248	3.49744e-35	6.77272e-33	NA	NA	NA	NA	NA	NA	NA	NA	NA	NA	NA	NA	30.54	0	25.729	0	0	0	49.95	54.863	71.55	0	0	0	30.808	0	32.201	0	0	0	0	0	0	0	0	0
BGIBMGA009770	blue	Toxin_hemocyte	gi|295424202|ref|NP_001171330.1| ced-6 protein [Bombyx mori] gi|293330270|dbj|BAJ04619.1| ced-6 protein [Bombyx mori]	0	100	NA	NA	NA	NA	NA	NA	NA	NA	NA	NA	NA	NA	1.11975	7.76862	1.56552e-13	1.61483e-11	105.234	113.641	109.43	372.317	370.326	370.909	68.687	64.75	80.056	11.839	9.265	12.13	247.044	237.491	243.106	377.602	388.733	404.815	120.824	116.53	117.277	15.246	11.995	9.866
BGIBMGA001865	green	CK_midgut	gi|512936333|ref|XP_004933493.1| PREDICTED: UDP-glucose 4-epimerase-like [Bombyx mori]	6e-173	100	NA	NA	NA	NA	-1.34238	6.99857	1.41194e-16	3.34525e-14	NA	NA	NA	NA	NA	NA	NA	NA	0.916	1.164	0.299	86.744	87.099	89.733	46.381	50.66	50.191	261.035	295.244	269.929	3.246	1.144	1.436	84.614	91.019	83.784	30.047	36.187	37.204	100.912	109.946	110.547
BGIBMGA001874	brown	Toxin_hemocyte	gi|153792203|ref|NP_001093281.1| vesicle amine transport protein [Bombyx mori] gi|95103100|gb|ABF51491.1| vesicle amine transport protein [Bombyx mori]	0	100	NA	NA	NA	NA	NA	NA	NA	NA	NA	NA	NA	NA	1.28892	6.36794	9.95311e-12	8.55553e-10	36.308	37.845	37.593	0.791	0.945	1.573	377.554	292.061	380.561	150.736	149.64	163.614	88.229	96.235	95.692	1.424	1.119	0.547	388.73	365.406	384.246	173.026	174.59	151.348
BGIBMGA001876	black	Toxin_midgut	gi|512936070|ref|XP_004933429.1| PREDICTED: alpha-amylase 4N-like [Bombyx mori]	0	100	NA	NA	NA	NA	1.31855	5.38792	1.68709e-11	2.02387e-09	NA	NA	NA	NA	NA	NA	NA	NA	82.996	99.836	93.146	60.563	69.668	68.486	27.605	26.476	26.741	35.17	35.539	37.728	85.463	87.732	86.557	62.476	62.346	61.974	32.84	32.249	29.555	90.415	90.613	87.914
BGIBMGA002803	pink	Toxin_hemocyte,Toxin_fatbody	gi|189241164|ref|XP_974773.2| PREDICTED: similar to guanine nucleotide exchange factor [Tribolium castaneum]	7e-55	52.13	1.26153	3.88232	0.000528859	0.00594015	NA	NA	NA	NA	NA	NA	NA	NA	1.13065	6.43936	9.01134e-09	4.45279e-07	52.508	41.316	35.685	11.489	9.244	9.986	9.144	8.582	8.787	5.732	6.684	7.472	100.237	90.525	93.613	9.945	10.355	7.308	20.279	24.554	20.652	7.758	8.154	6.418
BGIBMGA001903	green	CK_cell	gi|512935940|ref|XP_004933398.1| PREDICTED: ras-related protein Rab-43-like [Bombyx mori]	8e-132	100	NA	NA	NA	NA	NA	NA	NA	NA	-1.55242	5.11627	0.000143885	0.0377546	NA	NA	NA	NA	53.363	17.217	55.566	11.882	43.48	44.616	10.375	11.528	10.079	9.765	6.961	5.961	54.448	14.184	12.694	12.054	12.708	10.614	11.307	42.252	18.181	5.59	5.371	25.787
BGIBMGA001910	turquoise	Toxin_fatbody	gi|512936257|ref|XP_004933474.1| PREDICTED: diuretic hormone receptor-like [Bombyx mori]	8e-106	100	1.19572	4.24557	0.000191806	0.00253247	NA	NA	NA	NA	NA	NA	NA	NA	NA	NA	NA	NA	0	0	0	0.149	0	0	10.972	14.089	11.117	9.018	15.736	9.895	0	0	0	0	0	0.063	26.552	25.033	36.219	14.836	13.966	13.155
BGIBMGA013398	blue	Toxin_hemocyte	gi|512895160|ref|XP_004923606.1| PREDICTED: mucin-2-like [Bombyx mori]	0	100	NA	NA	NA	NA	NA	NA	NA	NA	NA	NA	NA	NA	1.1419	4.47523	0.000890534	0.0145807	16.645	5.463	9.112	1.765	1.986	0.817	44.566	38.274	40.796	19.673	16.656	15.117	26.231	20.705	19.599	0.785	1.72	0.864	55.428	53.844	48.873	19.553	17.086	16.003
BGIBMGA007257	pink	Toxin_hemocyte,Toxin_fatbody	gi|512905221|ref|XP_004925890.1| PREDICTED: uncharacterized protein LOC101737344 isoform X2 [Bombyx mori] gi|512905225|ref|XP_004925891.1| PREDICTED: uncharacterized protein LOC101737344 isoform X3 [Bombyx mori]	2e-119	100	1.09124	6.8709	2.23965e-10	1.14804e-08	NA	NA	NA	NA	NA	NA	NA	NA	1.14543	6.10915	2.24276e-09	1.26762e-07	31.574	32.379	36.391	16.723	14.948	17.567	82.372	89.081	84.075	28.893	35.948	33.632	75.536	69.568	79.699	15.418	18.566	14.044	183.482	178.182	203.067	26.827	32.187	31.815
BGIBMGA002009	turquoise	Toxin_hemocyte	gi|512933627|ref|XP_004932838.1| PREDICTED: protein phosphatase 1 regulatory subunit 12C-like [Bombyx mori]	1e-59	96.46	NA	NA	NA	NA	NA	NA	NA	NA	NA	NA	NA	NA	1.29143	4.78858	1.35633e-05	0.00037401	11.319	13.375	10.942	24.067	24.966	29.816	19.933	10.602	11.104	36.898	39.123	40.525	26.045	30.509	30.089	31.446	26.155	23.949	10.814	9.446	13.375	33.27	36.5	34.43
BGIBMGA002021	yellow	Toxin_hemocyte	gi|512933513|ref|XP_004932809.1| PREDICTED: CUB and sushi domain-containing protein 3-like [Bombyx mori]	0	100	NA	NA	NA	NA	NA	NA	NA	NA	NA	NA	NA	NA	1.5351	7.37964	3.61329e-20	7.09925e-18	70.272	70.173	64.033	6.441	6.178	6.37	5.865	4.751	5.931	2.771	3.36	3.699	206.413	202.461	192.146	5.268	7.2	5.741	7.307	6.648	7.129	2.895	3.594	3.061
BGIBMGA002152	brown	CK_fatbody	gi|512933857|ref|XP_004932895.1| PREDICTED: nuclear pore complex protein Nup153-like [Bombyx mori]	0	100	-1.25295	6.34926	3.42611e-10	1.69795e-08	NA	NA	NA	NA	NA	NA	NA	NA	NA	NA	NA	NA	139	123.854	133.665	269.193	272.269	275.766	120.501	128.976	117.796	155.606	153.508	154.109	147.029	127.526	133.535	279.149	282.679	289.954	52.92	50.104	54.891	92.436	92.651	96.139
BGIBMGA002165	black	CK_hemocyte	gi|557783787|ref|XP_005191500.1| PREDICTED: uncharacterized protein LOC101888854 isoform X1 [Musca domestica] gi|557783789|ref|XP_005191501.1| PREDICTED: uncharacterized protein LOC101888854 isoform X2 [Musca domestica]	3e-11	55.17	NA	NA	NA	NA	NA	NA	NA	NA	NA	NA	NA	NA	-7.97148	4.73948	1.67763e-05	0.000455389	0	106.132	0	0	0	0.199	0	0	0	0	0	0	0	0	0	0	0	0	0	0	0	0	0	0
BGIBMGA002175	brown	Toxin_fatbody	gi|223671006|tpd|FAA00454.1| TPA: putative cuticle protein [Bombyx mori]	2e-136	100	1.77635	8.01221	0.00246704	0.0218255	NA	NA	NA	NA	NA	NA	NA	NA	NA	NA	NA	NA	0.41	1.101	0.313	0	0	0	117.301	140.138	136.111	0.106	3.471	0.224	0.352	0.369	0	0	0	0	1108.88	148.212	140.26	1.147	0.802	1.215
BGIBMGA002215	yellow	CK_fatbody,CK_midgut	gi|158635981|ref|NP_001091841.1| mitochondrial import inner membrane translocase [Bombyx mori] gi|119866052|gb|ABM05495.1| mitochondrial import inner membrane translocase [Bombyx mori]	2e-98	85.8	-1.04927	7.54364	1.60358e-11	9.5276e-10	-1.17415	6.64618	5.85137e-10	5.49044e-08	NA	NA	NA	NA	NA	NA	NA	NA	61.89	61.88	65.788	220.698	223.214	215.856	284.076	276.344	267.178	194.468	199.208	228.324	66.46	61.633	66.127	223.096	214.434	202.934	134.222	136.467	144.847	85.681	74.5	111.547
BGIBMGA002222	red	Toxin_fatbody	gi|112983444|ref|NP_001036974.1| glutathione S-transferase delta 2 [Bombyx mori] gi|407943671|pdb|3VK9|A Chain A, Crystal Structure Of Delta-Class Glutathione Transferase From Silkmoth gi|407943672|pdb|3VK9|B Chain B, Crystal Structure Of Delta-Class Glutathione Transferase From Silkmoth gi|407943673|pdb|3VK9|C Chain C, Crystal Structure Of Delta-Class Glutathione Transferase From Silkmoth gi|407…	2e-155	100	3.35845	8.74408	1.93826e-95	8.81232e-93	NA	NA	NA	NA	NA	NA	NA	NA	NA	NA	NA	NA	697.487	794.662	762.382	27.596	30.527	30.98	86.076	95.367	82.125	143.457	142.185	129.837	580.452	579.518	535.152	29.197	34.174	30.857	935.102	952.782	905.903	226.753	220.093	224.037
BGIBMGA002231	brown	Toxin_fatbody	gi|512888568|ref|XP_004922107.1| PREDICTED: F-box/LRR-repeat protein 2-like isoform X1 [Bombyx mori]	0	100	1.89725	2.7217	0.00663128	0.0494956	NA	NA	NA	NA	NA	NA	NA	NA	NA	NA	NA	NA	0	0.146	0	5.607	4.805	5.218	2.681	2.541	2.131	34.244	32.379	34.501	0.09	0.168	0	4.663	5.457	4.757	8.859	7.373	10.396	36.764	40.961	38.402
BGIBMGA002259	purple	Toxin_fatbody	gi|148298826|ref|NP_001091813.1| myosin regulatory light chain 2 [Bombyx mori] gi|122119463|sp|Q1HPS0.1|MLR_BOMMO RecName: Full=Myosin regulatory light chain 2; Short=MLC-2 gi|95102960|gb|ABF51421.1| myosin light chain 2 [Bombyx mori] gi|163963296|gb|ABY50568.1| myosin light chain 2 [Bombyx mandarina] gi|194371731|gb|ACF59735.1| myosin light chain 2 [Bombyx mori] gi|206114239|gb|ACI05250.1| myosi…	5e-105	100	2.56909	6.32722	3.99573e-35	7.59697e-33	NA	NA	NA	NA	NA	NA	NA	NA	NA	NA	NA	NA	0.284	0.714	1.796	0	0.317	0.515	25.21	29.606	26.205	331.424	364.761	356.088	0.724	0.666	0.775	0	0.238	0	172.098	162.687	165.637	480.71	467.88	449.971
BGIBMGA013864	greenyellow	Toxin_hemocyte,Toxin_fatbody,Toxin_midgut	gi|112982699|ref|NP_001037684.1| gloverin 4 precursor [Bombyx mori] gi|82949292|dbj|BAE53373.1| antibacterial peptide [Bombyx mori]	2e-70	98.15	4.94397	6.95525	2.25485e-94	9.82459e-92	5.29482	1.95503	0.000122433	0.00296752	NA	NA	NA	NA	1.1726	6.39534	4.56874e-10	2.99216e-08	37.828	43.837	40.001	0	0.094	0.055	10.739	8.957	8.06	0.089	0.326	0.43	103.124	88.429	87.242	0.165	0.516	0.068	291.293	299.337	296.61	6.685	6.105	7.334
BGIBMGA002317	tan	Toxin_midgut	gi|512888685|ref|XP_004922126.1| PREDICTED: N-acetyl-D-glucosamine kinase-like [Bombyx mori]	9e-78	100	NA	NA	NA	NA	1.49575	3.35866	0.000359505	0.00755438	NA	NA	NA	NA	NA	NA	NA	NA	24.177	52.509	45.199	22.239	17.499	19.981	9.013	8.597	10.643	6.067	7.043	7.501	49.355	51.341	53.966	18.927	13.103	15.174	10.974	7.425	12.708	23.739	22.116	13.053
BGIBMGA002349	turquoise	CK_hemocyte,Toxin_fatbody	gi|164459610|gb|ABY57912.1| hydroxypyruvate isomerase [Bombyx mori]	0	100	1.56675	7.54435	3.43517e-23	4.12891e-21	NA	NA	NA	NA	NA	NA	NA	NA	-1.32468	12.584	4.43154e-26	1.261e-23	6560.6	7316.45	7370.74	44.876	55.484	55.341	106.726	113.411	104.497	561.879	571.499	565.002	2919.74	2811.97	2893.87	50.823	51.257	53.871	315.481	331.505	350.692	664.357	665.863	676.534
BGIBMGA002360	purple	CK_fatbody	gi|114051355|ref|NP_001040373.1| WD repeat domain 61 [Bombyx mori] gi|95102668|gb|ABF51272.1| WD repeat domain 61 [Bombyx mori]	2e-67	92.04	-1.71441	4.69196	8.26079e-06	0.000166121	NA	NA	NA	NA	NA	NA	NA	NA	NA	NA	NA	NA	36.345	47.36	21.139	45.446	55.275	51.061	33.002	59.258	22.379	57.385	47.35	28.639	17.626	30.692	21.126	105.629	90.578	104.262	15.124	9.816	10.928	23.534	24.367	18.65
BGIBMGA002382	black	CK_hemocyte	gi|512926901|ref|XP_004931201.1| PREDICTED: putative uncharacterized protein DDB_G0282133-like [Bombyx mori]	0	100	NA	NA	NA	NA	NA	NA	NA	NA	NA	NA	NA	NA	-1.05252	9.71022	3.60143e-10	2.37752e-08	1111.18	759.678	864.362	1.247	1.224	1.23	0.843	1.456	0.953	0.939	0.126	0.479	459.792	442.216	436.897	2.042	0.918	0.751	1.797	1.432	2.599	0.207	0.573	0.474
BGIBMGA002384	green	Toxin_fatbody	gi|290560853|ref|NP_001166790.1| cuticular protein glycine-rich 13 precursor [Bombyx mori] gi|223671000|tpd|FAA00451.1| TPA: putative cuticle protein [Bombyx mori]	0	91.58	3.10832	3.62744	6.63338e-11	3.57553e-09	NA	NA	NA	NA	NA	NA	NA	NA	NA	NA	NA	NA	0	0.181	0.204	0	0	0	2.432	1.934	3.124	0.58	0.125	0.472	0	0	0	0	0	0.107	25.102	22.78	23.969	1.383	0.291	0.793
BGIBMGA002396	turquoise	Toxin_hemocyte	no hints			NA	NA	NA	NA	NA	NA	NA	NA	NA	NA	NA	NA	1.8481	7.76558	1.33377e-29	5.00284e-27	68.822	77.332	79.356	0.613	1.268	1.57	22.001	21.687	18.296	7.039	4.672	7.32	266.554	299.225	264.855	0.509	1.058	0.608	18.261	11.205	15.944	5.705	5.273	6.692
BGIBMGA000209	blue	Toxin_hemocyte	gi|512937156|ref|XP_004933698.1| PREDICTED: fibrillin-1-like [Bombyx mori]	0	99.19	NA	NA	NA	NA	NA	NA	NA	NA	NA	NA	NA	NA	1.20424	7.87019	4.36381e-14	5.00141e-12	127.962	112.732	100.496	0.31	0.468	0.412	171.289	128.934	169.569	16.938	22.432	19.641	254.034	281.98	259.204	0.464	7.741	0.098	216.387	216.66	202.208	23.058	23.11	20.245
BGIBMGA002399	brown	Toxin_hemocyte	gi|512926842|ref|XP_004931186.1| PREDICTED: calcium-activated potassium channel slowpoke-like [Bombyx mori]	2e-66	96.43	NA	NA	NA	NA	NA	NA	NA	NA	NA	NA	NA	NA	5.85597	2.96194	9.59751e-07	3.35588e-05	0	0	0	0	0	0	96.915	88.26	0	0	0	0	8.584	7.796	8.233	0	0	0.386	78.335	92.773	0	0	0	7.68
BGIBMGA002404	brown	Toxin_fatbody	gi|512927097|ref|XP_004931249.1| PREDICTED: cytosolic carboxypeptidase-like protein 5-like [Bombyx mori]	0	86.84	1.05027	5.3375	4.8803e-07	1.31529e-05	NA	NA	NA	NA	NA	NA	NA	NA	NA	NA	NA	NA	14.288	9.733	11.075	3.267	3.405	2.817	27.86	30.319	29.534	31.554	34.504	35.015	9.653	10.2	10.277	3.165	3.904	2.547	61.598	64.23	62.448	55.649	53.077	53.309
BGIBMGA002432	turquoise	Toxin_fatbody	gi|512926607|ref|XP_004931128.1| PREDICTED: V-type proton ATPase 116 kDa subunit a isoform 1-like isoform X1 [Bombyx mori] gi|512926611|ref|XP_004931129.1| PREDICTED: V-type proton ATPase 116 kDa subunit a isoform 1-like isoform X2 [Bombyx mori]	0	99.64	1.71495	7.0189	1.74744e-23	2.14976e-21	NA	NA	NA	NA	NA	NA	NA	NA	NA	NA	NA	NA	67.571	65.927	63.556	9.014	8.596	8.122	71.25	63.324	75.55	1428.25	1508.74	1478.52	62.722	62.707	67.361	5.945	9.142	7.055	242.492	234.025	235.164	1935.52	1872.91	1712.43
BGIBMGA002457	green	CK_hemocyte	gi|512926556|ref|XP_004931115.1| PREDICTED: retinal dehydrogenase 1-like [Bombyx mori]	0	100	NA	NA	NA	NA	NA	NA	NA	NA	NA	NA	NA	NA	-1.16031	6.45506	2.69379e-09	1.47213e-07	83.678	104.923	93.177	2.77	3.161	2.327	70.145	69.357	67.208	695.324	687.111	690.585	41.752	41.245	44.604	2.052	3.373	2.589	56.041	61.521	54.07	757.756	778.532	771.568
BGIBMGA002461	green	Toxin_cell	gi|512926575|ref|XP_004931120.1| PREDICTED: ribulose-phosphate 3-epimerase-like [Bombyx mori]	5e-139	100	NA	NA	NA	NA	NA	NA	NA	NA	2.06269	8.62849	6.84896e-60	5.93051e-56	NA	NA	NA	NA	255.76	245.626	271.024	100.544	103.052	110.395	334.203	100.723	331.665	36.995	40.67	41.867	255.543	63.408	261.312	467.165	434.801	434.272	337.804	92.011	346.941	24.804	26.139	101.076
BGIBMGA002468	yellow	Toxin_fatbody,Toxin_midgut	gi|387789311|ref|YP_006254376.1| putative acetyltransferase [Solitalea canadensis DSM 3403] gi|504491326|ref|WP_014678428.1| acetyltransferase [Solitalea canadensis] gi|379652144|gb|AFD05200.1| putative acetyltransferase [Solitalea canadensis DSM 3403]	8e-08	39.34	4.11629	3.3173	0.00217206	0.0195973	6.57622	2.64812	0.000380599	0.00792733	NA	NA	NA	NA	NA	NA	NA	NA	0.792	1.186	1.204	0	0	0	2.184	0.366	1.064	0	0.35	0.547	0.423	1.697	12.437	1.549	1.205	0.346	0.217	0.432	67.795	49.438	0.851	0
BGIBMGA002490	brown	Toxin_hemocyte	gi|512926698|ref|XP_004931151.1| PREDICTED: PH and SEC7 domain-containing protein 4-like [Bombyx mori]	9e-22	90.38	NA	NA	NA	NA	NA	NA	NA	NA	NA	NA	NA	NA	6.21326	3.2033	3.04443e-05	0.000775297	0	0	0	0	0	0	0	0	0	0	10.397	0	12.709	18.769	0	0	7.256	0	0	0	0	0	0	0
BGIBMGA000208	greenyellow	Toxin_hemocyte	gi|512937156|ref|XP_004933698.1| PREDICTED: fibrillin-1-like [Bombyx mori]	3e-132	99.05	NA	NA	NA	NA	NA	NA	NA	NA	NA	NA	NA	NA	1.232	7.772	4.27881e-13	4.30594e-11	111.537	112.757	89.239	0.176	0.202	0.171	172.636	106.807	150.023	20.683	13.146	18.391	235.011	280.77	230.627	0.235	15.09	0	198.669	198.638	208.421	19.651	18.639	13.025
BGIBMGA002549	yellow	Toxin_fatbody	gi|290563261|ref|NP_001166743.1| cuticular protein RR-1 motif 5 precursor [Bombyx mori] gi|223671111|tpd|FAA00507.1| TPA: putative cuticle protein [Bombyx mori]	3e-70	100	2.22796	6.28059	1.08981e-26	1.51948e-24	NA	NA	NA	NA	NA	NA	NA	NA	NA	NA	NA	NA	0	0	0	0	0	0	30.2	32.653	33.018	15.037	18.985	23.141	0	0	0.397	0	0	0	140.34	168.531	154.965	11.145	14.844	11.312
BGIBMGA002565	black	CK_midgut	gi|512931904|ref|XP_004932415.1| PREDICTED: uncharacterized protein LOC101746215 isoform X1 [Bombyx mori] gi|512931908|ref|XP_004932416.1| PREDICTED: uncharacterized protein LOC101746215 isoform X2 [Bombyx mori]	2e-178	100	NA	NA	NA	NA	-2.76951	3.59928	3.6647e-09	2.9684e-07	NA	NA	NA	NA	NA	NA	NA	NA	0	0.483	0.254	0	0.066	0.369	49.67	62.613	54.068	24.857	26.046	27.212	0	0.236	0	0.142	0.409	0	44.633	43.844	37.081	4.231	4.156	3.151
BGIBMGA002611	red	CK_midgut	gi|512931656|ref|XP_004932357.1| PREDICTED: lysine-specific demethylase 6A-like [Bombyx mori]	0	97.35	NA	NA	NA	NA	-1.26535	3.53019	0.00188734	0.0289423	NA	NA	NA	NA	NA	NA	NA	NA	14.609	13.774	12.471	3.298	2.678	3.318	5.054	4.117	5.916	20.47	20.401	20.156	17.008	14.086	12.833	3.293	3.311	2.67	8.901	9.466	9.585	9.829	9.072	7.687
BGIBMGA002626	yellow	CK_midgut	gi|164448664|ref|NP_001106744.1| antennal binding protein precursor [Bombyx mori] gi|87248601|gb|ABD36353.1| antennal binding protein [Bombyx mori]	6e-92	100	NA	NA	NA	NA	-4.79793	1.82779	0.001956	0.0295646	NA	NA	NA	NA	NA	NA	NA	NA	0.638	0	0	13.859	10.237	11.531	5.721	1.338	1.889	4.219	4.104	5.747	0	0.58	0	11.802	13.467	12.479	2.148	2.646	2.742	0	0	0
BGIBMGA002650	turquoise	CK_hemocyte	gi|114051864|ref|NP_001040133.1| hydroxymethylglutaryl-CoA lyase [Bombyx mori] gi|87248159|gb|ABD36132.1| hydroxymethylglutaryl-CoA lyase isoform 1 [Bombyx mori]	4e-98	97.96	NA	NA	NA	NA	NA	NA	NA	NA	NA	NA	NA	NA	-2.7453	2.82403	0.00147799	0.0227121	9.485	5.736	3.192	0.631	0	0.517	2.509	2.81	4.407	3.365	6.98	3.186	0	1.047	0.775	0.178	1.957	0.778	1.478	6.465	3.699	7.529	9	7.417
BGIBMGA002654	tan	CK_fatbody	gi|512931491|ref|XP_004932316.1| PREDICTED: probable ATP-dependent RNA helicase Dbp73D-like [Bombyx mori]	0	100	-1.00744	6.04667	2.37312e-06	5.50238e-05	NA	NA	NA	NA	NA	NA	NA	NA	NA	NA	NA	NA	50.583	46.754	45.206	63.202	63.446	65.242	89.173	103.897	88.253	60.307	54.874	53.971	45.322	48.228	47.572	73.205	66.662	63.272	52.114	48.151	45.159	31.95	25.313	37.129
BGIBMGA009812	pink	Toxin_hemocyte	gi|512911292|ref|XP_004927376.1| PREDICTED: differentially expressed in FDCP 6-like [Bombyx mori]	0	91.83	NA	NA	NA	NA	NA	NA	NA	NA	NA	NA	NA	NA	1.24212	6.05737	2.36761e-10	1.61467e-08	22.51	33.052	34.61	7.716	7.103	8.752	12.146	13.538	14.078	4.974	5.037	5.426	70.217	78.548	72.56	8.577	9.678	9.252	9.067	11.652	9.52	5.97	5.074	5.119
BGIBMGA006913	pink	Toxin_hemocyte	gi|512893761|ref|XP_004923259.1| PREDICTED: BMP-binding endothelial regulator protein-like [Bombyx mori]	0	100	NA	NA	NA	NA	NA	NA	NA	NA	NA	NA	NA	NA	1.31443	7.52113	5.22684e-16	7.43653e-14	91.505	80.217	80.364	15.406	17.721	17.684	20.088	16.725	19.451	14.828	16.673	15.903	211.432	214.557	209.951	15.616	16.046	16.296	17.072	16.942	22.119	12.81	12.309	10.855
BGIBMGA002670	grey	CK_fatbody	gi|112983352|ref|NP_001036966.1| lipase-1 [Bombyx mori] gi|21623760|dbj|BAC00960.1| lipase-1 [Bombyx mori]	0	100	-1.31409	5.32071	6.87165e-09	2.71158e-07	NA	NA	NA	NA	NA	NA	NA	NA	NA	NA	NA	NA	0	0	0	44.405	42.726	47.157	62.448	58.857	53.871	37439.7	39574.3	39517.7	0.234	0.238	0.895	36.364	43.175	42.305	22.822	28.226	22.558	68245	72240.3	66805.1
BGIBMGA002672	turquoise	CK_fatbody	gi|512932002|ref|XP_004932438.1| PREDICTED: arf-GAP with SH3 domain, ANK repeat and PH domain-containing protein 2-like [Bombyx mori]	7e-101	100	-5.48386	2.53282	0.00016226	0.00220072	NA	NA	NA	NA	NA	NA	NA	NA	NA	NA	NA	NA	105.47	94.768	2.009	42.885	1.045	2.119	12.223	8.324	0.362	18.668	7.561	0.252	107.4	109.782	3.966	0	1.01	29.464	0.664	0	0.638	20.891	24.195	0
BGIBMGA002677	yellow	CK_midgut	gi|389608893|dbj|BAM18058.1| similar to CG2765 [Papilio xuthus]	2e-94	89.29	NA	NA	NA	NA	-2.23568	3.36532	2.07591e-06	8.98328e-05	NA	NA	NA	NA	NA	NA	NA	NA	5.37	12.813	6.918	4.889	3.339	3.485	12.722	11.67	10.987	22.263	18.813	20.001	7.008	7.988	6.333	2.149	2.699	3.974	9.201	4.637	4.838	4.557	3.622	4.448
BGIBMGA002682	green	Toxin_hemocyte	gi|607368463|gb|EZA62576.1| Putative phosphoenolpyruvate synthase [Cerapachys biroi]	2e-118	34.19	NA	NA	NA	NA	NA	NA	NA	NA	NA	NA	NA	NA	4.43746	8.19541	4.21036e-113	1.7372e-109	19.855	20.223	20.638	0.234	0.187	0.051	4.957	5.436	4.729	188.646	187.329	179.309	444.969	472.744	453.411	0.352	0.123	0.209	3.511	5.083	3.865	154.97	158.563	151.333
BGIBMGA000396	greenyellow	Toxin_hemocyte	gi|114052432|ref|NP_001040127.1| RGS-GAIP interacting protein GIPC [Bombyx mori] gi|87248137|gb|ABD36121.1| RGS-GAIP interacting protein GIPC [Bombyx mori]	5e-51	100	NA	NA	NA	NA	NA	NA	NA	NA	NA	NA	NA	NA	1.32327	8.12601	4.90387e-14	5.39556e-12	115.7	113.2	151.958	52.19	53.356	49.252	41.748	38.717	47.093	190.142	166.082	175.451	277.863	339.83	357.533	49.989	52.475	50.054	43.383	50.088	49.3	187.356	191.978	175.168
BGIBMGA009071	blue	Toxin_hemocyte	gi|512898651|ref|XP_004924449.1| PREDICTED: phosphatidylinositol 3,4,5-trisphosphate 3-phosphatase and dual-specificity protein phosphatase PTEN-like, partial [Bombyx mori]	7e-164	97.84	NA	NA	NA	NA	NA	NA	NA	NA	NA	NA	NA	NA	1.34614	5.83215	2.2986e-10	1.58067e-08	22.783	24.107	26.629	24.388	27.357	27.408	26.53	20.755	25.103	23.881	30.514	27.978	74.947	49.712	66.685	29.511	29.146	23.421	19.972	20.72	14.225	17.921	22.607	15.607
BGIBMGA002694	brown	CK_fatbody	gi|512932038|ref|XP_004932447.1| PREDICTED: nucleoporin NUP188 homolog [Bombyx mori]	0	100	-1.01152	5.22342	1.09135e-05	0.000215261	NA	NA	NA	NA	NA	NA	NA	NA	NA	NA	NA	NA	32.35	27.578	29.186	19.493	18.075	18.389	53.04	51.892	47.499	26.056	28.376	26.853	27.885	28.635	26.461	19.612	19.007	17.123	27.674	24.272	25.964	14.65	12.812	15.415
BGIBMGA002702	purple	CK_hemocyte	gi|379698912|ref|NP_001243927.1| ken and barbie protein [Bombyx mori] gi|333827635|gb|AEG19520.1| ken and barbie protein [Bombyx mori]	0	99.82	NA	NA	NA	NA	NA	NA	NA	NA	NA	NA	NA	NA	-1.11289	6.58084	1.25937e-08	6.11312e-07	92.031	105.698	108.326	10.439	13.031	10.355	18.381	17.934	18.427	12.429	12.593	11.419	48.315	52.204	43.544	11.104	13.568	11.456	16.307	16.192	18.032	4.681	6.815	4.853
BGIBMGA002711	tan	Toxin_hemocyte,Toxin_fatbody	gi|114052040|ref|NP_001040211.1| Rab-related protein [Bombyx mori] gi|87248399|gb|ABD36252.1| Rab-related protein [Bombyx mori]	3e-154	98.17	2.17929	5.76033	3.61997e-24	4.61635e-22	NA	NA	NA	NA	NA	NA	NA	NA	1.5017	8.90592	6.11996e-23	1.29492e-20	171.161	227.496	202.059	87.781	92.673	92.29	22.144	21.929	24.305	110.938	106.862	96.839	593.958	588.852	555.106	77.85	81.371	85.472	107.864	106.554	104.444	143.808	149.169	147.449
BGIBMGA002712	red	Toxin_fatbody	gi|527487133|dbj|BAN66704.1| Bm-brown protein [Bombyx mori]	0	99	3.38004	2.59316	2.10993e-05	0.000382383	NA	NA	NA	NA	NA	NA	NA	NA	NA	NA	NA	NA	0	0	0	0	0.168	0.317	1.042	1.478	0.392	2.213	2.671	1.936	0	0	0	0.132	0	0.191	10.672	8.979	7.965	5.286	2.926	3.262
BGIBMGA009049	greenyellow	Toxin_hemocyte	gi|512898549|ref|XP_004924425.1| PREDICTED: niemann-Pick C1 protein-like isoform X1 [Bombyx mori]	0	96.87	NA	NA	NA	NA	NA	NA	NA	NA	NA	NA	NA	NA	1.40052	8.42441	4.90822e-23	1.06586e-20	156.098	153.115	145.603	144.979	130.936	132.468	67.906	55.249	76.539	60.923	68.656	76.108	409.425	410.674	398.233	134.484	149.447	144.039	117.278	121.119	112.131	84.255	79.721	74.584
BGIBMGA002739	red	Toxin_fatbody	gi|512908751|ref|XP_004926758.1| PREDICTED: attacin-like [Bombyx mori]	7e-151	100	5.82818	8.6948	1.871e-144	1.63042e-141	NA	NA	NA	NA	NA	NA	NA	NA	NA	NA	NA	NA	0.621	0.854	0.681	0	0	0	13.442	20.373	15.564	0.155	0.089	0.68	1.023	0.915	1.31	0	0.019	0	1030.06	1022.9	869.588	1.644	0.195	0.335
BGIBMGA002747	brown	Toxin_fatbody	gi|112983296|ref|NP_001037006.1| attacin precursor [Bombyx mori] gi|2493574|sp|Q26431.1|ATT_BOMMO RecName: Full=Attacin; AltName: Full=Nuecin; Flags: Precursor gi|994849|gb|AAB34519.1| attacin, partial [Bombyx mori]	1e-150	99.53	3.86039	10.0373	1.6763e-138	1.25208e-135	NA	NA	NA	NA	NA	NA	NA	NA	NA	NA	NA	NA	37.03	45.681	41.551	0	0	0	146.556	144.365	171.645	1.693	0.314	0.674	88.525	75.068	83.308	0	0.213	0.148	2272.82	2344.07	2350.97	0.757	3.036	1.351
BGIBMGA003708	pink	Toxin_hemocyte,Toxin_fatbody	gi|512922635|ref|XP_004930164.1| PREDICTED: c-Maf-inducing protein-like [Bombyx mori]	0	89.56	2.0545	4.71573	1.9133e-13	1.36104e-11	NA	NA	NA	NA	NA	NA	NA	NA	1.40762	5.83235	3.06989e-12	2.78381e-10	22.229	23.593	26.046	7.927	7.186	7.016	10.756	11.335	12.083	10.889	11.867	13.537	68.27	60.708	66.166	7.94	8.668	5.69	46.282	49.694	53.271	20.306	14.948	17.458
BGIBMGA002773	brown	Toxin_hemocyte	gi|112983539|ref|NP_001036881.1| annexin B13 [Bombyx mori] gi|17298129|dbj|BAB78533.1| annexin B13a [Bombyx mori]	0	98.96	NA	NA	NA	NA	NA	NA	NA	NA	NA	NA	NA	NA	1.32829	10.2365	1.80094e-26	5.30762e-24	521.313	579.057	559.963	249.188	269.041	259.956	93.211	96.567	91.219	36.751	39.216	34.453	1436.31	1418.36	1388.54	239.788	266.783	267.176	97.685	103.567	92.023	32.311	37.892	34.92
BGIBMGA002802	brown	Toxin_fatbody	no hints			1.1409	3.76609	0.00383544	0.0312398	NA	NA	NA	NA	NA	NA	NA	NA	NA	NA	NA	NA	24.685	21.232	20.088	7.333	24.668	6.932	5.424	16.221	3.701	9.451	3.903	8.806	18.609	20.313	17.26	31.29	7.063	6.639	18.53	18.825	22.622	12.842	10.245	16.07
BGIBMGA002692	blue	Toxin_hemocyte	gi|512932034|ref|XP_004932446.1| PREDICTED: guanine nucleotide exchange factor DBS-like [Bombyx mori]	0	100	NA	NA	NA	NA	NA	NA	NA	NA	NA	NA	NA	NA	1.48241	4.68673	1.9837e-06	6.39433e-05	10.072	9.921	9.426	16.656	17.5	18.433	49.169	51.344	52.523	66.082	66.907	70.772	25.997	29.636	28.391	20.029	20.774	19.348	53.072	53.877	56.489	58.63	58.778	67.045
BGIBMGA002804	black	Toxin_hemocyte	gi|189241164|ref|XP_974773.2| PREDICTED: similar to guanine nucleotide exchange factor [Tribolium castaneum]	3e-93	46.48	NA	NA	NA	NA	NA	NA	NA	NA	NA	NA	NA	NA	1.13551	6.32361	1.1745e-09	7.07443e-08	45.882	38.688	34.425	6.592	4.549	4.124	8.952	5.521	13.355	5.625	5.535	5.514	84.443	88.69	89.066	5.014	5.796	4.805	14.716	18.605	18.102	4.725	6.821	6.63
BGIBMGA003682	pink	Toxin_hemocyte	gi|585087537|gb|AHJ26004.1| YKI3, partial [Bombyx mori]	5e-165	97.49	NA	NA	NA	NA	NA	NA	NA	NA	NA	NA	NA	NA	1.5707	4.53314	2.2168e-06	7.00884e-05	8.362	7.05	9.007	0.482	0.655	0.657	67.454	71.819	76.372	162.743	163.452	175.083	26.097	25.565	24.355	0.875	2.305	1.217	73.158	76.425	76.05	190.706	210.093	187.532
BGIBMGA002808	brown	CK_fatbody	gi|512885493|ref|XP_004921604.1| PREDICTED: cytoplasmic tRNA 2-thiolation protein 1-like [Bombyx mori]	1e-139	100	-1.03693	4.47936	0.000742541	0.00799665	NA	NA	NA	NA	NA	NA	NA	NA	NA	NA	NA	NA	23.435	23.504	24.33	46.308	49.912	51.075	30.691	30.222	26.316	40.038	26.761	33.458	26.069	23.559	23.019	50.419	47.491	43.016	14.138	15.611	14.449	22.718	14.233	21.682
BGIBMGA002816	yellow	Toxin_hemocyte	gi|512885915|ref|XP_004921675.1| PREDICTED: leucine-rich repeat flightless-interacting protein 2-like [Bombyx mori]	3e-155	89.47	NA	NA	NA	NA	NA	NA	NA	NA	NA	NA	NA	NA	1.1355	7.0625	1.04607e-10	7.77674e-09	60.234	64.919	71.625	30.77	27.788	27.117	11.521	8.668	11.022	19.422	24.952	18.626	140.98	159.822	143.173	25.264	27.194	27.171	19.093	17.888	17.041	30.068	29.94	32.904
BGIBMGA002823	turquoise	CK_midgut	gi|512885323|ref|XP_004921576.1| PREDICTED: rab5 GDP/GTP exchange factor-like [Bombyx mori]	0	98.55	NA	NA	NA	NA	-1.61449	4.90319	3.10107e-11	3.62825e-09	NA	NA	NA	NA	NA	NA	NA	NA	18.185	13.1	12.385	5.171	3.942	3.98	8.536	9.703	8.732	56.822	65.37	66.905	14.954	12.086	16.031	3.589	4.685	3.653	10.649	8.084	10.201	24.164	19.8	18.302
BGIBMGA005013	blue	Toxin_hemocyte,Toxin_fatbody	gi|512887433|ref|XP_004921924.1| PREDICTED: uncharacterized protein KIAA1211 homolog [Bombyx mori]	3e-36	59.88	1.53566	4.55866	1.12366e-07	3.4357e-06	NA	NA	NA	NA	NA	NA	NA	NA	1.74376	5.56369	2.75302e-06	8.63801e-05	31.026	8.907	11.976	5.034	3.871	5.058	11.814	10.828	16.412	45.904	35.017	27.395	36.909	82.953	51.295	6.785	87.834	7.328	49.059	35.502	32.8	63.69	49.22	68.026
BGIBMGA002908	tan	Toxin_midgut	gi|591293912|ref|XP_007074220.1| PREDICTED: leukocyte antigen CD37 isoform X3 [Panthera tigris altaica]	8e-14	33.04	NA	NA	NA	NA	1.47056	3.88717	1.00838e-05	0.000360621	NA	NA	NA	NA	NA	NA	NA	NA	2.202	2.083	1.308	0	0	0	0.911	1.35	0.512	10.098	11.757	11.161	3.294	2.589	1.828	0	0	0	2.527	3.538	1.703	31.391	24.329	35.064
BGIBMGA002915	brown	Toxin_fatbody	gi|512885585|ref|XP_004921618.1| PREDICTED: X-box-binding protein 1-like [Bombyx mori]	1e-129	100	1.10594	4.07418	0.000914502	0.0094589	NA	NA	NA	NA	NA	NA	NA	NA	NA	NA	NA	NA	12.993	11.848	14.422	2.33	141.949	3.228	13.023	8.662	10.989	11.026	6.497	13.343	9.422	8.928	7.631	142.041	2.49	5.967	20.479	25.735	28.128	18.433	15.896	13.8
BGIBMGA002920	tan	Toxin_fatbody	gi|512885654|ref|XP_004921630.1| PREDICTED: CD63 antigen-like [Bombyx mori]	0	99.63	1.56488	6.53167	2.22854e-15	1.83495e-13	NA	NA	NA	NA	NA	NA	NA	NA	NA	NA	NA	NA	314.194	510.089	495.961	45.764	42.374	39.183	41.397	53.689	66.443	1986.94	1958.47	3006.61	445.894	297.854	389.126	41.18	44.846	45.388	165.445	168.659	158.175	3590.12	2423.05	4411.72
BGIBMGA002922	salmon	Toxin_fatbody	gi|218775025|dbj|BAH03523.1| ABC transporter [Bombyx mori]	0	100	1.55765	3.1478	0.00395382	0.0320256	NA	NA	NA	NA	NA	NA	NA	NA	NA	NA	NA	NA	0.126	0.101	0.416	0.794	0.571	0.847	3.686	4.418	4.251	2.617	3.603	3.345	0.574	0.119	0.264	0.494	1.583	1.044	13.349	11.025	13.14	3.154	2.874	2.164
BGIBMGA002926	tan	Toxin_midgut	gi|332021331|gb|EGI61705.1| Rho GTPase-activating protein 21 [Acromyrmex echinatior]	2e-54	30.92	NA	NA	NA	NA	1.04037	4.05598	0.00068773	0.0130613	NA	NA	NA	NA	NA	NA	NA	NA	23.525	20.39	21.175	4.901	3.761	4.984	15.994	16.358	18.919	15.727	14.643	15.879	30.315	29.556	29.962	5.721	5.215	4.547	18.776	19.534	19.39	30.212	32.329	31.279
BGIBMGA002936	salmon	Toxin_fatbody	no hints			1.74632	4.41614	1.46583e-08	5.37831e-07	NA	NA	NA	NA	NA	NA	NA	NA	NA	NA	NA	NA	0	0	0	0	0.375	0	12.961	7.818	10.588	1.716	2.053	2.302	0	0.524	0	0	0	0	29.798	48.229	35.544	2.042	2.424	1.201
BGIBMGA002937	purple	Toxin_fatbody	gi|182509194|ref|NP_001116808.1| nitric oxide synthase-like protein [Bombyx mori] gi|317411802|sp|B1B557.1|NOSL_BOMMO RecName: Full=Nitric oxide synthase-like protein gi|169643679|dbj|BAG12563.1| nitric-oxide synthase like protein [Bombyx mori]	0	100	1.29633	4.30104	4.61607e-05	0.000744911	NA	NA	NA	NA	NA	NA	NA	NA	NA	NA	NA	NA	0	0	0.014	0.278	0.163	0.019	12.644	11.098	12.68	2.789	4.671	4.994	0.315	0.245	0.612	0.328	0.155	0.105	33.064	29.615	29.135	2.218	3.065	2.327
BGIBMGA002938	turquoise	Toxin_hemocyte	gi|112983340|ref|NP_001036963.1| nitric oxide synthase [Bombyx mori] gi|74819490|sp|Q8T8C0.1|NOS_BOMMO RecName: Full=Nitric oxide synthase; AltName: Full=Inducible nitric oxide synthase-like protein gi|19223819|dbj|BAB85836.1| nitric oxide synthase [Bombyx mori] gi|224176041|dbj|BAH23563.1| nitric-oxide synthase [Bombyx mori]	0	91.62	NA	NA	NA	NA	NA	NA	NA	NA	NA	NA	NA	NA	2.8961	3.20306	4.95508e-05	0.00119559	0.716	0.575	0.725	0.011	0.122	0.05	15.675	16.172	13.856	139.786	139.387	141.625	9.442	11.034	8.751	0.05	0.462	0.001	16.316	16.53	15.182	169.122	161.664	169.041
BGIBMGA006138	blue	Toxin_hemocyte,Toxin_fatbody	gi|512918674|ref|XP_004929190.1| PREDICTED: tribbles homolog 2-like [Bombyx mori]	2e-97	100	2.13631	3.47982	3.36013e-06	7.55127e-05	NA	NA	NA	NA	NA	NA	NA	NA	1.78703	3.94009	8.27474e-05	0.00183065	4.067	5.931	3.248	71.085	65.309	65.183	4.745	4.203	3.128	8.341	6.193	10.006	15.617	16.832	16.194	59.217	63.646	65.665	24.405	15.808	15.256	16.125	15.373	12.116
BGIBMGA002953	cyan	Toxin_cell	gi|512926172|ref|XP_004931019.1| PREDICTED: probable 26S proteasome non-ATPase regulatory subunit 3-like [Bombyx mori]	0	100	NA	NA	NA	NA	NA	NA	NA	NA	9.86308	6.12187	3.03827e-08	2.92316e-05	NA	NA	NA	NA	0	0	0	0	0	0	0	0	0	0	0	0	0	0	0	0	0	262.881	0	0	0	0	0	0
BGIBMGA002397	pink	Toxin_hemocyte	gi|167736344|ref|NP_001108066.1| spatzle-1 precursor [Bombyx mori]	0	98.86	NA	NA	NA	NA	NA	NA	NA	NA	NA	NA	NA	NA	1.90392	7.77084	7.84685e-26	2.08878e-23	82.939	53.235	84.561	0.972	1.869	0.935	10.512	13.54	10.465	3.875	2.897	1.487	268.883	288.172	283.449	1.616	0.513	1.075	10.693	17.468	14.784	4.198	2.737	4.159
BGIBMGA002979	green	Toxin_midgut	gi|512926045|ref|XP_004930987.1| PREDICTED: carbonyl reductase [NADPH] 1-like [Bombyx mori]	0	100	NA	NA	NA	NA	5.42116	2.01295	0.000404417	0.0083138	NA	NA	NA	NA	NA	NA	NA	NA	0	0	0	47.553	0	0	0	0	0	0	0	0	0	0	0	45.397	0	0	0	0	0	12.176	9.39	0
BGIBMGA003014	brown	Toxin_fatbody,Toxin_midgut	gi|512925839|ref|XP_004930937.1| PREDICTED: cytochrome b5-like [Bombyx mori]	8e-111	100	4.19958	7.57755	2.10604e-99	1.00104e-96	2.21152	4.44441	8.98101e-15	1.66888e-12	NA	NA	NA	NA	NA	NA	NA	NA	5.306	5.084	5.721	13.533	14.394	15.603	23.467	23.537	21.689	9.691	12.575	11.496	8.992	7.68	6.689	14.602	13.425	12.594	443.423	426.361	451.642	54.02	52.693	52.206
BGIBMGA003044	magenta	CK_midgut	gi|512926303|ref|XP_004931052.1| PREDICTED: myosin-VIIa-like [Bombyx mori]	0	99.76	NA	NA	NA	NA	-2.09745	3.52738	2.01379e-06	8.75445e-05	NA	NA	NA	NA	NA	NA	NA	NA	0.529	0.61	0.503	0.258	0.244	0.272	28.12	28.473	25.884	23.776	22.769	22.495	0.887	0.876	0.865	0.176	1.019	0.229	17.641	19.128	17.376	5.75	4.753	5.521
BGIBMGA003056	brown	Toxin_midgut	gi|512925606|ref|XP_004930880.1| PREDICTED: probable maltase H-like [Bombyx mori]	0	100	NA	NA	NA	NA	1.20832	9.50826	1.16851e-22	5.03364e-20	NA	NA	NA	NA	NA	NA	NA	NA	0.084	0.103	0	0.417	0.243	0.376	0.287	0.68	0.21	693.38	688.842	662.674	0	0	0	0.284	0.207	0.243	1.001	0.532	0.749	1513.58	1501.32	1641.55
BGIBMGA006770	blue	Toxin_hemocyte,Toxin_fatbody	gi|512923808|ref|XP_004930442.1| PREDICTED: sterile alpha and TIR motif-containing protein 1-like isoform X2 [Bombyx mori]	0	88.64	1.35489	6.42472	6.25862e-13	4.39238e-11	NA	NA	NA	NA	NA	NA	NA	NA	2.14529	8.94787	1.69821e-51	1.7517e-48	140.512	150.271	148.035	36.94	39.196	41.807	55.455	56.031	54.562	177.275	177.356	168.973	667.482	647.94	661.118	40.594	40.109	39.236	148.079	153.472	136.983	258.962	248.656	251.336
BGIBMGA003128	yellow	CK_fatbody,CK_midgut	gi|512925715|ref|XP_004930906.1| PREDICTED: clavesin-1-like [Bombyx mori]	5e-43	100	-1.10514	4.27256	0.000860985	0.00903947	-2.56946	4.09843	1.33337e-12	2.00577e-10	NA	NA	NA	NA	NA	NA	NA	NA	6.058	2.984	6.886	0.862	1.371	0.592	21.816	29.058	24.45	38.039	34.18	42.05	5.451	7.536	9.176	2.035	2.247	1.828	16.024	11.471	9.798	3.759	7.258	7.093
BGIBMGA003129	turquoise	CK_midgut	gi|512925715|ref|XP_004930906.1| PREDICTED: clavesin-1-like [Bombyx mori]	2e-157	100	NA	NA	NA	NA	-1.02451	6.02187	6.30577e-07	3.16189e-05	NA	NA	NA	NA	NA	NA	NA	NA	6.283	6.21	6.732	2.627	4.181	2.748	44.355	101.551	60.174	149.802	127.812	111.458	8.901	5.052	5.624	3.54	4.085	4.33	68.752	61.936	64.745	56.104	56.92	74.405
BGIBMGA003135	salmon	CK_hemocyte,CK_fatbody	gi|571559491|ref|XP_006566395.1| PREDICTED: uncharacterized protein LOC408351 isoform X4 [Apis mellifera] gi|571559495|ref|XP_006566396.1| PREDICTED: uncharacterized protein LOC408351 isoform X5 [Apis mellifera] gi|571559498|ref|XP_006566397.1| PREDICTED: uncharacterized protein LOC408351 isoform X6 [Apis mellifera] gi|571559502|ref|XP_006566398.1| PREDICTED: uncharacterized protein LOC408351 iso…	2e-102	39.22	-5.75448	2.70655	5.96312e-05	0.000936282	NA	NA	NA	NA	NA	NA	NA	NA	-6.25148	3.23883	2.48053e-05	0.000633726	14.233	0	17.883	0	0	0	12.342	12.696	0	17.434	0	0	0	0	0	0	0	0	0	0	0	12.914	0	0
BGIBMGA000037	blue	Toxin_hemocyte,Toxin_fatbody	gi|112984238|ref|NP_001037460.1| cecropin-B precursor [Bombyx mori] gi|156523056|ref|NP_001096031.1| cecropin B precursor [Bombyx mori] gi|512906063|ref|XP_004926103.1| PREDICTED: cecropin-B-like [Bombyx mori] gi|512906067|ref|XP_004926104.1| PREDICTED: cecropin-B-like [Bombyx mori] gi|512906075|ref|XP_004926106.1| PREDICTED: cecropin-B-like [Bombyx mori] gi|512906079|ref|XP_004926107.1| PREDICTE…	2e-35	100	7.4738	8.44556	1.39341e-178	2.42848e-175	NA	NA	NA	NA	NA	NA	NA	NA	2.29733	3.50273	7.01955e-05	0.00159136	2.026	2.542	1.829	0.134	0	0.597	3.556	4.763	5.022	0.741	0	0.5	14.918	9.973	10.492	0.917	1.135	0.06	782.453	864.144	860.297	2.318	1.11	0.586
BGIBMGA003176	brown	CK_hemocyte	gi|512925988|ref|XP_004930972.1| PREDICTED: homeobox protein Mohawk-like [Bombyx mori]	0	100	NA	NA	NA	NA	NA	NA	NA	NA	NA	NA	NA	NA	-2.51686	4.16284	6.29527e-09	3.18703e-07	22.489	19.694	19.805	2.991	3.325	1.958	0.698	0.166	1.56	1.123	0.727	0.181	2.86	3.495	5.269	2.674	2.65	3.02	0.988	0.861	1.015	0	0	0.91
BGIBMGA003180	cyan	Toxin_midgut	gi|512926004|ref|XP_004930976.1| PREDICTED: zinc transporter ZIP10-like [Bombyx mori]	0	99.19	NA	NA	NA	NA	1.37047	5.32095	1.94018e-10	1.9986e-08	NA	NA	NA	NA	NA	NA	NA	NA	0.252	0.175	0.638	1.737	1.34	1.339	6.585	8.275	6.849	40.285	31.3	31.199	0	0.209	0	1.16	0.913	1.377	6.821	4.524	8.586	73.739	81.176	101.681
BGIBMGA003199	turquoise	Toxin_hemocyte,Toxin_fatbody	gi|38564807|gb|AAR23825.1| dopa-decarboxylase [Antheraea pernyi]	0	99.79	2.7233	3.98457	1.90863e-12	1.25525e-10	NA	NA	NA	NA	NA	NA	NA	NA	2.12426	4.5919	1.2529e-09	7.49196e-08	6.529	6.373	6.517	0.102	0.125	0.19	4.544	4.235	4.661	2.926	3.256	4.369	25.765	30.914	29.473	0	0	0.1	29.79	31.455	30.626	3.78	4.581	3.614
BGIBMGA003276	turquoise	CK_fatbody	gi|389609011|dbj|BAM18117.1| unknown secreted protein [Papilio xuthus]	2e-19	40	-2.67293	2.66602	0.00258471	0.0227511	NA	NA	NA	NA	NA	NA	NA	NA	NA	NA	NA	NA	1.777	2.306	3.061	1.012	1.122	0.652	7.351	4.634	9.525	2.84	0	0	0.037	0.597	0.964	0.226	1.175	0.391	1.355	1.553	0.86	1.313	1.357	1.924
BGIBMGA003322	turquoise	CK_fatbody	no hints			-2.08913	4.25255	2.2688e-08	7.90683e-07	NA	NA	NA	NA	NA	NA	NA	NA	NA	NA	NA	NA	0	0	0	0	0	0	28.261	29.213	27.841	12929.1	13253.8	13380.1	0	0	0	0	0	0	6.098	7.158	7.268	13892.3	14561.7	14207.5
BGIBMGA005834	blue	Toxin_hemocyte,Toxin_fatbody	gi|242014214|ref|XP_002427786.1| NF-kappa-B inhibitor alpha, putative [Pediculus humanus corporis] gi|212512255|gb|EEB15048.1| NF-kappa-B inhibitor alpha, putative [Pediculus humanus corporis]	5e-43	33.43	2.76795	7.54385	1.37161e-53	3.87645e-51	NA	NA	NA	NA	NA	NA	NA	NA	2.53792	7.71686	2.1808e-25	5.45331e-23	44.103	60.76	41.904	45.948	50.631	45.749	53.706	49.589	62.869	110.003	121.698	120.301	391.925	234.38	248.509	40.691	44.632	45.428	384.094	423.179	368.012	162.426	221.749	162.448
BGIBMGA003326	yellow	CK_fatbody	gi|512902786|ref|XP_004925460.1| PREDICTED: uncharacterized protein LOC101738880 isoform X2 [Bombyx mori] gi|512902790|ref|XP_004925461.1| PREDICTED: uncharacterized protein LOC101738880 isoform X3 [Bombyx mori] gi|512902794|ref|XP_004925462.1| PREDICTED: uncharacterized protein LOC101738880 isoform X4 [Bombyx mori] gi|512902798|ref|XP_004925463.1| PREDICTED: uncharacterized protein LOC101738880 …	2e-21	32.3	-1.71302	3.9809	2.98946e-05	0.000514158	NA	NA	NA	NA	NA	NA	NA	NA	NA	NA	NA	NA	0	0.034	0	0	0.095	0.31	22.408	22.238	22.032	19429.3	19998.9	20296.3	0	0.24	0	0	0	0	6.184	7.193	6.624	12418.3	13077.6	12099.3
BGIBMGA003330	red	Toxin_fatbody	gi|512892835|ref|XP_004923030.1| PREDICTED: probable uridine nucleosidase 2-like [Bombyx mori]	0	98.44	1.68573	4.729	3.80132e-10	1.87502e-08	NA	NA	NA	NA	NA	NA	NA	NA	NA	NA	NA	NA	0	0	0	0.034	0.207	0.156	14.607	13.782	12.702	8.356	4.975	4.678	0	0.111	0	0	5.386	0.21	52.711	42.564	42.482	8.912	9.73	9.264
BGIBMGA003338	black	CK_fatbody	gi|153792367|ref|NP_001093268.1| mitochondrial 28S ribosomal protein S14 [Bombyx mori] gi|95102828|gb|ABF51355.1| mitochondrial 28S ribosomal protein S14 [Bombyx mori]	6e-72	96.46	-5.13664	5.34251	1.93742e-07	5.67496e-06	NA	NA	NA	NA	NA	NA	NA	NA	NA	NA	NA	NA	1.657	1.356	49.17	1.077	82.13	76.746	110.681	3.576	115.208	0.201	1.09	0	1.006	0.282	65.555	0.633	0.291	67.643	2.101	1.372	0.965	0	0	0.84
BGIBMGA003356	brown	Toxin_hemocyte,Toxin_fatbody,Toxin_midgut	gi|512892688|ref|XP_004922993.1| PREDICTED: HIG1 domain family member 1A, mitochondrial-like isoform X1 [Bombyx mori] gi|512892692|ref|XP_004922994.1| PREDICTED: HIG1 domain family member 1A, mitochondrial-like isoform X2 [Bombyx mori] gi|512892696|ref|XP_004922995.1| PREDICTED: HIG1 domain family member 1A, mitochondrial-like isoform X3 [Bombyx mori] gi|512892700|ref|XP_004922996.1| PREDICTED: H…	4e-63	100	2.2714	4.01497	1.04715e-09	4.8884e-08	2.29803	3.19888	1.99922e-06	8.73115e-05	NA	NA	NA	NA	1.34779	4.00606	0.00185769	0.0271806	8.335	4.966	5.17	0.422	1.174	0.348	4.719	4.937	7.345	5.032	2.692	5.025	15.768	14.777	17.124	0.521	0	1.137	33.315	27.236	26.768	22.784	18.549	19.645
BGIBMGA003357	turquoise	Toxin_hemocyte	gi|512892712|ref|XP_004922999.1| PREDICTED: beta carbonic anhydrase 1-like [Bombyx mori]	3e-130	100	NA	NA	NA	NA	NA	NA	NA	NA	NA	NA	NA	NA	1.03919	4.89582	0.000232431	0.00456672	15.205	11.887	15.607	5.718	7.873	6.812	20.52	19.168	21.756	35.038	33.792	41.849	28.294	32.079	28.958	7.159	8.259	8.511	23.795	22.452	22.388	37.875	30.158	42.039
BGIBMGA003391	yellow	CK_cell,Toxin_midgut	gi|114052917|ref|NP_001040116.1| DnaJ domain-containing protein [Bombyx mori] gi|87248103|gb|ABD36104.1| DnaJ domain-containing protein [Bombyx mori]	3e-78	100	NA	NA	NA	NA	5.45279	4.5185	3.01535e-08	1.98448e-06	-5.2816	4.29928	0.000131238	0.0366576	NA	NA	NA	NA	1.642	0.455	1.531	69.245	0.259	0	7.497	6.651	6.801	1.208	1.304	0.779	1.092	1.684	1.317	0.293	0.805	0.621	5.712	5.037	5.65	0.564	91.743	99.336
BGIBMGA003396	yellow	CK_fatbody,CK_midgut	gi|512892731|ref|XP_004923004.1| PREDICTED: DNA polymerase alpha catalytic subunit-like [Bombyx mori]	0	98.98	-1.03795	4.17442	0.00364041	0.0300456	-1.07889	3.74345	0.00297585	0.0412888	NA	NA	NA	NA	NA	NA	NA	NA	37.104	39.184	38.975	49.484	51.171	55.58	22.674	22.815	23.889	23.775	23.337	23.609	30.971	32.013	33.29	50.053	50.992	52.087	10.901	11.647	10.209	9.384	11.69	11.279
BGIBMGA003402	magenta	CK_hemocyte,Toxin_fatbody	gi|389609859|dbj|BAM18541.1| similar to CG6353 [Papilio xuthus]	4e-95	83.65	3.00238	3.49408	2.49706e-05	0.000436652	NA	NA	NA	NA	NA	NA	NA	NA	-3.50428	5.16755	8.77027e-07	3.07967e-05	68.822	4.744	76.579	6.231	4.823	5.105	2.871	2.63	1.921	8.32	5.751	5.553	4.186	4.467	3.665	5.887	5.674	5.05	7.868	9.067	51.255	5.71	7.15	6.469
BGIBMGA003458	tan	Toxin_fatbody	gi|108872133|gb|EAT36358.1| AAEL011551-PA [Aedes aegypti]	3e-135	35.65	1.89316	3.11842	0.000511862	0.00578654	NA	NA	NA	NA	NA	NA	NA	NA	NA	NA	NA	NA	1.422	2.261	1.543	3.107	3.267	3.375	3.135	2.764	2.976	1949.89	1921.17	1904.51	2.867	1.31	2.695	3.165	3.95	2.623	13.869	10.972	15.321	2119.88	2133.09	2267.39
BGIBMGA003471	brown	Toxin_fatbody	no hints			2.80741	2.29025	0.00183506	0.0170268	NA	NA	NA	NA	NA	NA	NA	NA	NA	NA	NA	NA	1.366	0.437	1.097	17.379	25.965	18.638	0.172	0.493	2.041	0.361	0	0.833	1.035	0.562	0.997	16.289	17.858	18.756	7.891	6.348	4.491	0.047	0.798	0.121
BGIBMGA003491	salmon	Toxin_hemocyte	gi|512923266|ref|XP_004930312.1| PREDICTED: serine proteinase stubble-like [Bombyx mori]	0	100	NA	NA	NA	NA	NA	NA	NA	NA	NA	NA	NA	NA	3.42572	2.67177	0.000978892	0.0157156	0	0.449	1.301	0.082	0.162	0	0.154	0	0.362	0.227	0	0	6.242	4.839	6.215	0.116	0	0.031	0.34	0.159	0.203	0	0	0.362
BGIBMGA004632	blue	Toxin_hemocyte	gi|345486537|ref|XP_001604444.2| PREDICTED: microphthalmia-associated transcription factor-like [Nasonia vitripennis]	3e-10	47.22	NA	NA	NA	NA	NA	NA	NA	NA	NA	NA	NA	NA	2.55519	5.25247	1.30649e-19	2.45026e-17	9.157	10.289	4.87	4.556	3.618	1.206	5.91	5.086	5.291	58.939	33.362	49.275	49.755	43.765	55.59	1.358	4.346	1.819	8.444	6.469	8.009	34.484	29.454	39.392
BGIBMGA003505	brown	Toxin_hemocyte	gi|357611875|gb|EHJ67690.1| putative pdz domain protein arc [Danaus plexippus]	0	74.07	NA	NA	NA	NA	NA	NA	NA	NA	NA	NA	NA	NA	1.66663	6.8038	9.88171e-19	1.73498e-16	35.601	45.284	44.793	34.305	31.395	34.611	30.908	35.035	32.368	14.253	13.307	15.333	138.222	136.076	136.229	28.112	30.873	30.807	26.814	28.737	23.056	14.498	18.099	14.359
BGIBMGA003506	magenta	Toxin_hemocyte	gi|357611876|gb|EHJ67691.1| putative PDZ domain containing 3 [Danaus plexippus]	0	66.64	NA	NA	NA	NA	NA	NA	NA	NA	NA	NA	NA	NA	1.15407	8.55716	4.00151e-17	6.23028e-15	184.474	183.123	194.634	182.707	190.171	189.777	33.023	34.586	32.688	4.132	4.279	4.804	421.575	421.53	428.331	186.436	186.343	185.446	50.903	53.917	49.41	5.108	4.675	4.927
BGIBMGA003508	black	CK_fatbody	gi|512922539|ref|XP_004930141.1| PREDICTED: proline-rich extensin-like protein EPR1-like [Bombyx mori]	1e-93	100	-1.61423	3.91249	0.000103186	0.00150072	NA	NA	NA	NA	NA	NA	NA	NA	NA	NA	NA	NA	0	0	0	0	0.11	0	22.97	17.759	20.97	1.893	0	0.108	0	0	0	0	0.082	0	8.273	3.262	10.102	0	0	0
BGIBMGA010740	pink	CK_fatbody,Toxin_hemocyte	gi|512934725|ref|XP_004933102.1| PREDICTED: facilitated trehalose transporter Tret1-like [Bombyx mori]	0	94.75	-1.16013	6.18705	2.82714e-08	9.69292e-07	NA	NA	NA	NA	NA	NA	NA	NA	2.84673	6.07831	3.80544e-36	2.24304e-33	11.382	13.778	13.107	18.478	20.537	20.385	104.21	97.815	117.844	182.485	184.889	188.11	91.577	101.326	89.599	20.882	23.34	20.973	43.372	53.427	52.446	173.763	173.722	157.342
BGIBMGA006097	blue	Toxin_hemocyte	gi|332021489|gb|EGI61854.1| Laminin subunit alpha-1 [Acromyrmex echinatior]	4e-108	41.8	NA	NA	NA	NA	NA	NA	NA	NA	NA	NA	NA	NA	3.20949	2.56064	0.00342374	0.0449168	0.355	0.375	0.649	8.31	8.181	7.356	6.264	4.658	5.096	1.707	1.734	2.051	4.33	4.376	4.409	7.541	7.489	7.677	5.545	4.554	5.744	0.707	1.673	1.014
BGIBMGA003552	green	Toxin_hemocyte	gi|512923104|ref|XP_004930271.1| PREDICTED: protein rolling stone-like [Bombyx mori]	0	100	NA	NA	NA	NA	NA	NA	NA	NA	NA	NA	NA	NA	1.34179	5.60743	1.57316e-09	9.14815e-08	24.328	18.16	21.179	0	0	0	8.783	9.617	9.378	163.315	151.828	147.973	59.78	51.087	51.51	0.122	0.049	0	2.472	4.468	2.616	142.618	131.591	142.255
BGIBMGA003564	purple	CK_hemocyte	gi|512922127|ref|XP_004930044.1| PREDICTED: ornithine aminotransferase, mitochondrial-like [Bombyx mori]	0	100	NA	NA	NA	NA	NA	NA	NA	NA	NA	NA	NA	NA	-1.20031	6.38956	3.13924e-10	2.08911e-08	84.841	96.433	90.862	26.615	27.571	30.346	134.162	128.189	129.946	23.97	28.658	26.408	38.188	44.856	36.141	23.439	24.263	25.835	71.909	70.886	73.652	32.138	34.786	37.046
BGIBMGA003574	brown	CK_hemocyte	gi|512923057|ref|XP_004930260.1| PREDICTED: atlastin-like [Bombyx mori]	5e-124	97.81	NA	NA	NA	NA	NA	NA	NA	NA	NA	NA	NA	NA	-1.12882	10.6425	3.77946e-17	5.99771e-15	1611.57	1882.54	1806.93	0.028	0.523	0.172	4.66	3.506	5.24	0.06	0.297	0	873.733	787.405	805.013	0.413	0.417	0	2.824	2.714	3.343	0	0	0
BGIBMGA003575	black	CK_hemocyte	gi|512923057|ref|XP_004930260.1| PREDICTED: atlastin-like [Bombyx mori]	0	100	NA	NA	NA	NA	NA	NA	NA	NA	NA	NA	NA	NA	-1.23893	11.1286	2.85994e-25	6.94125e-23	2443.57	2585.55	2579.84	0.192	0.364	0	6.175	5.492	5.147	0	0.672	0	1112.81	1068.73	1095.26	0.601	0.7	0.832	1.751	3.716	3.261	0	0	0
BGIBMGA003599	turquoise	CK_fatbody	gi|512922971|ref|XP_004930246.1| PREDICTED: atlastin-like, partial [Bombyx mori]	2e-40	100	-7.14036	3.75427	3.25213e-15	2.63624e-13	NA	NA	NA	NA	NA	NA	NA	NA	NA	NA	NA	NA	144.882	168.378	0	0.829	0	0	20.269	26.07	21.229	193.168	228.629	219.748	142.574	163.017	141.612	1.23	0.919	0.831	0	0	0	227.581	0	0
BGIBMGA003610	yellow	CK_fatbody	gi|512922052|ref|XP_004930025.1| PREDICTED: glucose-6-phosphate 1-epimerase-like, partial [Bombyx mori]	7e-162	100	-1.02861	4.83692	0.000196196	0.00258066	NA	NA	NA	NA	NA	NA	NA	NA	NA	NA	NA	NA	20.124	16.67	17.367	38.768	48.26	30.855	49.93	32.795	32.548	39.063	35.687	33.654	12.136	19.479	16.141	31.752	30.439	35.646	15.504	23.456	20.821	23.662	23.831	28.882
BGIBMGA007804	greenyellow	Toxin_hemocyte	gi|172356113|ref|NP_001116499.1| matrix metalloproteinase 1 isoform 1 [Bombyx mori] gi|169730452|gb|ACA64804.1| matrix metalloproteinase variant 1 [Bombyx mori]	0	99.8	NA	NA	NA	NA	NA	NA	NA	NA	NA	NA	NA	NA	3.55816	4.20453	1.48985e-13	1.55624e-11	1.599	1.992	1.646	0.246	0.148	0.302	41.035	35.302	37.737	204.341	202.541	199.127	23.923	25.051	24.18	0.137	0.209	0.087	31.105	34.832	36.033	174.151	167.988	182.099
BGIBMGA003643	turquoise	CK_fatbody	gi|114051562|ref|NP_001040103.1| 6-pyruvoyltetrahydropterin synthase [Bombyx mori] gi|87248071|gb|ABD36088.1| 6-pyruvoyltetrahydropterin synthase [Bombyx mori] gi|528314518|dbj|BAN66732.1| 6-pyrovoyltetrahydropterin synthase [Bombyx mori] gi|528314526|dbj|BAN66736.1| 6-pyrovoyltetrahydropterin synthase [Bombyx mori]	3e-120	100	-1.09669	7.48607	2.11582e-11	1.21888e-09	NA	NA	NA	NA	NA	NA	NA	NA	NA	NA	NA	NA	54.487	61.243	52.981	177.045	189.622	192.625	264.29	278.106	259.83	44.929	44.499	38.009	57.973	48.74	43.243	182.316	170.783	173.834	137.561	112.119	137.531	44.584	47.131	49.431
BGIBMGA003645	grey	CK_hemocyte,CK_midgut	gi|512922219|ref|XP_004930067.1| PREDICTED: lipoyltransferase 1, mitochondrial-like isoform X1 [Bombyx mori] gi|512922223|ref|XP_004930068.1| PREDICTED: lipoyltransferase 1, mitochondrial-like isoform X2 [Bombyx mori] gi|512922227|ref|XP_004930069.1| PREDICTED: lipoyltransferase 1, mitochondrial-like isoform X3 [Bombyx mori]	0	100	NA	NA	NA	NA	-1.0213	5.74707	1.66277e-06	7.39816e-05	NA	NA	NA	NA	-1.41436	5.87301	5.07675e-11	3.98984e-09	68.022	54.479	73.729	40.91	40.465	35.389	319.603	298.009	296.861	108.597	107.484	100.489	19.373	23.822	30.617	44.05	33.331	40.642	233.803	262.904	312.168	56.741	41.401	56.644
BGIBMGA003647	tan	Toxin_fatbody	gi|512922247|ref|XP_004930074.1| PREDICTED: tyrosine-protein kinase shark-like [Bombyx mori]	0	100	1.04283	5.82499	1.30758e-07	3.95183e-06	NA	NA	NA	NA	NA	NA	NA	NA	NA	NA	NA	NA	76.304	79.822	81.117	46.12	47.378	50.876	44.336	39.04	41.186	38.714	42.168	37.23	104.705	111.56	101.592	43.538	45.835	50.601	89.109	88.217	87.964	35.337	40.537	42.674
BGIBMGA003654	turquoise	Toxin_hemocyte,Toxin_fatbody,Toxin_midgut	gi|112983268|ref|NP_001037011.1| insulin receptor precursor [Bombyx mori] gi|6648596|gb|AAF21243.1|AF025542_1 insulin receptor-like protein precursor [Bombyx mori]	0	97.93	1.29163	5.32098	1.16215e-09	5.37724e-08	1.62013	3.50505	5.87497e-05	0.00161852	NA	NA	NA	NA	1.26986	6.08097	3.82428e-11	3.09392e-09	32.676	30.773	29.42	16.91	16.879	15.539	26.904	24.542	26.404	6.743	7.968	6.997	74.051	79.382	74.623	17.369	21.413	19.891	66.444	68.066	63.637	24.356	23.77	21.052
BGIBMGA003668	yellow	Toxin_midgut	gi|512922406|ref|XP_004930112.1| PREDICTED: mitochondrial ribonuclease P protein 1 homolog [Bombyx mori]	2e-175	100	NA	NA	NA	NA	4.73415	4.14337	5.46134e-24	3.23482e-21	NA	NA	NA	NA	NA	NA	NA	NA	38.774	0.967	38.634	1.515	1.205	61.328	2.8	1.602	1.41	1.196	1.203	2.026	27.398	47.904	21.865	3.221	0.823	2.23	1.853	20.424	0	70.466	38.891	44.025
BGIBMGA003672	black	Toxin_fatbody	gi|499006024|ref|XP_004535722.1| PREDICTED: mucin-17-like isoform X4 [Ceratitis capitata]	2e-130	34.62	1.4949	4.675	4.6375e-08	1.55423e-06	NA	NA	NA	NA	NA	NA	NA	NA	NA	NA	NA	NA	30.578	28.325	31.407	18.523	16.021	19.067	13.308	16.189	14.447	23.009	29.276	22.15	57.989	59.728	57.768	20.105	21.795	18.867	46.495	35.663	47.889	37.489	51.058	38.987
BGIBMGA003171	greenyellow	Toxin_hemocyte,Toxin_fatbody	gi|512925960|ref|XP_004930965.1| PREDICTED: annulin-like isoform X2 [Bombyx mori]	0	100	3.68727	4.95908	6.44471e-35	1.20343e-32	NA	NA	NA	NA	NA	NA	NA	NA	3.56979	3.96315	3.92422e-11	3.14395e-09	1.486	1.172	1.598	2.054	1.879	1.592	5.397	5.227	4.291	2.979	2.733	2.741	20.64	20.32	17.375	1.983	1.244	1.722	70.41	69.356	69.486	2.88	3.037	3.025
BGIBMGA003706	purple	Toxin_hemocyte,Toxin_fatbody	gi|512922635|ref|XP_004930164.1| PREDICTED: c-Maf-inducing protein-like [Bombyx mori]	2e-131	100	2.43348	6.17621	2.61262e-30	4.07764e-28	NA	NA	NA	NA	NA	NA	NA	NA	1.18304	6.52877	1.21026e-10	8.91699e-09	45.765	44.944	42.342	10.298	8.14	9.56	26.476	26.927	25.389	21.071	14.554	16.219	103.364	101.682	102.417	13.121	9.367	8.557	153.361	150.022	139.283	23.344	28.645	30.95
BGIBMGA003707	brown	Toxin_hemocyte,Toxin_fatbody	gi|512922635|ref|XP_004930164.1| PREDICTED: c-Maf-inducing protein-like [Bombyx mori]	9e-34	100	2.28351	4.09873	2.37328e-10	1.2106e-08	NA	NA	NA	NA	NA	NA	NA	NA	1.09882	4.82469	0.000152782	0.0031053	11.888	15.298	11.046	3.587	3.828	2.787	6.66	6.757	5.634	6.629	7.477	9.149	29.374	34.009	23.725	6.081	4.348	2.057	35.767	28.515	29.784	12.703	6.478	14.373
BGIBMGA000563	greenyellow	Toxin_hemocyte	gi|223890158|ref|NP_001138794.1| tyrosine hydroxylase [Bombyx mori] gi|220983691|dbj|BAH11148.1| tyrosine hydroxylase [Bombyx mori] gi|256539084|gb|ACU82844.1| tyrosine hydroxylase [Bombyx mori] gi|319428697|gb|ADV56703.1| tyrosine hydroxylase [Bombyx mandarina] gi|319428699|gb|ADV56704.1| tyrosine hydroxylase [Bombyx mandarina] gi|319428703|gb|ADV56706.1| tyrosine hydroxylase [Bombyx mandarina] …	0	100	NA	NA	NA	NA	NA	NA	NA	NA	NA	NA	NA	NA	3.89971	5.69169	1.59584e-43	1.31689e-40	3.617	4.28	6.028	0.099	0.014	0.217	12.227	12.141	10.702	8.425	10.108	7.197	78.251	78.087	72.458	0	0	0.047	13.536	11.753	15.756	8.381	8.392	8.316
BGIBMGA003717	turquoise	CK_fatbody	gi|512922706|ref|XP_004930182.1| PREDICTED: 6-phosphofructokinase-like isoform X2 [Bombyx mori]	0	94.7	-1.42417	6.97144	4.11769e-16	3.64904e-14	NA	NA	NA	NA	NA	NA	NA	NA	NA	NA	NA	NA	101.356	105.243	102.438	22.836	22.487	21.103	196.758	197.055	197.358	199.23	196.716	188.859	86.597	91.374	93.234	22.998	24.621	23.447	77.604	74.871	73.846	136.88	132.579	132.621
BGIBMGA003719	turquoise	CK_fatbody	gi|512922726|ref|XP_004930187.1| PREDICTED: uncharacterized protein LOC101746063 isoform X2 [Bombyx mori]	2e-73	100	-1.26844	8.20092	5.0029e-18	4.88929e-16	NA	NA	NA	NA	NA	NA	NA	NA	NA	NA	NA	NA	0.257	0.792	0	76.415	82.99	73.327	447.279	470.625	459.986	17.277	8.97	14.778	0.877	1.394	0.621	74.956	83.632	76.095	196.395	185.097	210.301	10.261	13.678	13.442
BGIBMGA003739	purple	Toxin_midgut	gi|168823421|ref|NP_001108344.1| facilitated trehalose transporter Tret1 [Bombyx mori] gi|300681184|sp|A9ZSY3.1|TRET1_BOMMO RecName: Full=Facilitated trehalose transporter Tret1; Short=BmTRET1 gi|164454395|dbj|BAF96744.1| trehalose transporter BmTRET1 [Bombyx mori]	0	92.48	NA	NA	NA	NA	2.17901	5.69548	3.96935e-23	1.97987e-20	NA	NA	NA	NA	NA	NA	NA	NA	81.004	89.502	84.3	20.169	21.026	21.971	105.542	163.527	157.835	29.307	29.918	27.559	62.925	64.304	67.461	16.313	16.96	17.124	204.926	211.25	213.232	128.286	126.451	134.413
BGIBMGA002855	pink	CK_fatbody,Toxin_hemocyte	gi|512885187|ref|XP_004921553.1| PREDICTED: protein rhomboid-like [Bombyx mori]	0	100	-1.39837	4.41336	1.5221e-05	0.000287864	NA	NA	NA	NA	NA	NA	NA	NA	3.96453	6.58509	1.52379e-54	2.09572e-51	8.467	9.114	9.159	0	0	0	32.433	26.578	30.038	3.318	3.452	2.114	153.6	149.497	131.774	0	0.142	0	14.29	11.691	6.899	2.543	4.374	3.859
BGIBMGA002683	blue	Toxin_hemocyte	gi|345483297|ref|XP_003424788.1| PREDICTED: putative phosphoenolpyruvate synthase-like [Nasonia vitripennis]	6e-82	45	NA	NA	NA	NA	NA	NA	NA	NA	NA	NA	NA	NA	4.29427	7.98109	9.22415e-104	2.53726e-100	19.595	20.354	17.519	0.153	0.151	0.156	5.412	3.89	5.068	157.651	149.863	157.318	390.647	392.916	391.193	0.245	0.14	0.479	3.676	3.898	2.675	113.805	123.369	106.42
BGIBMGA003835	turquoise	CK_midgut	gi|379698990|ref|NP_001243967.1| UDP-glycosyltransferase UGT41A3 precursor [Bombyx mori] gi|363896186|gb|AEW43177.1| UDP-glycosyltransferase UGT41A3 [Bombyx mori]	0	100	NA	NA	NA	NA	-1.23674	6.33682	6.54671e-11	7.2992e-09	NA	NA	NA	NA	NA	NA	NA	NA	0.105	0.081	0.162	0.155	0.081	0.293	5.286	3.656	4.256	157.545	170.081	176.205	0.183	0	0.195	0.427	0.426	0.054	1.963	2.33	3.372	78.928	77.759	56.163
BGIBMGA006721	greenyellow	Toxin_hemocyte	gi|512923574|ref|XP_004930385.1| PREDICTED: small integral membrane protein 14-like isoform X1 [Bombyx mori] gi|512923578|ref|XP_004930386.1| PREDICTED: small integral membrane protein 14-like isoform X2 [Bombyx mori]	4e-48	100	NA	NA	NA	NA	NA	NA	NA	NA	NA	NA	NA	NA	5.82126	5.97095	2.35896e-05	0.000606421	2.189	0.375	2.011	0	89.026	0	175.962	137.451	0.73	1.044	0.686	1.565	290.455	0.479	1.503	77.245	0	77.947	121.807	0.885	0.895	1.392	0.661	2.443
BGIBMGA003894	salmon	Toxin_fatbody	gi|383858593|ref|XP_003704785.1| PREDICTED: proton-coupled amino acid transporter 1-like [Megachile rotundata]	4e-149	50.9	1.88024	4.20636	2.17159e-08	7.59477e-07	NA	NA	NA	NA	NA	NA	NA	NA	NA	NA	NA	NA	0	0	0	0.19	0.152	0.179	8.553	6.674	9.616	27.369	29.236	24.973	0.109	0	0	0.135	2.611	0	31.509	32.303	32.948	46.98	43.431	39.965
BGIBMGA004149	pink	Toxin_hemocyte,Toxin_fatbody	no hints			5.80945	2.54405	0.00206246	0.0187377	NA	NA	NA	NA	NA	NA	NA	NA	6.10753	3.12744	0.00189342	0.0275079	0	0	0	0	1.505	1.874	0	0	0	6.682	0	0	0	0	29.735	0.848	1.759	1.661	26.883	0	0	0	0	0
BGIBMGA001573	greenyellow	CK_midgut,Toxin_hemocyte	gi|433339067|dbj|BAM73886.1| cytochrome P450 [Bombyx mori]	0	100	NA	NA	NA	NA	-1.23365	3.89921	0.000385167	0.00800488	NA	NA	NA	NA	6.47005	5.69263	3.79354e-60	6.26086e-57	0.106	1.046	0.546	0	0.098	0	0.212	0.146	0.084	28.534	26.078	28.438	81.373	81.784	78.305	0	0.011	0	0.373	0.418	1.061	12.026	13.038	11.125
BGIBMGA007858	greenyellow	Toxin_hemocyte	gi|146148639|gb|ABQ02262.1| glutathione S-transferae zeta 2 [Bombyx mori]	5e-19	100	NA	NA	NA	NA	NA	NA	NA	NA	NA	NA	NA	NA	7.06406	3.84972	3.68125e-15	4.74651e-13	0	0	0	3.896	0	0	43.259	42.232	0	40.742	36.556	0	21.45	17.681	18.845	0	4.359	4.077	0	32.887	0	59.997	0	58.317
BGIBMGA003934	purple	Toxin_fatbody	gi|607354114|gb|EZA48777.1| PPPDE peptidase domain-containing protein [Cerapachys biroi]	8e-57	50	1.88753	4.41767	7.76417e-10	3.72431e-08	NA	NA	NA	NA	NA	NA	NA	NA	NA	NA	NA	NA	1.014	3.932	2.487	3.023	1	0.243	7.362	8.512	13.263	91.325	76.301	87.142	4.861	5.4	4.542	1.164	1.113	1.056	30.502	46.949	37.314	104.259	81.324	45.574
BGIBMGA003935	salmon	Toxin_fatbody	gi|512907324|ref|XP_004926413.1| PREDICTED: sodium-independent sulfate anion transporter-like [Bombyx mori]	0	91.47	2.49685	5.13076	4.55123e-24	5.734e-22	NA	NA	NA	NA	NA	NA	NA	NA	NA	NA	NA	NA	28.621	26.615	23.208	0	0	0	13.601	10.342	12.893	7.007	9.584	7.955	16.186	15.534	15.239	0	0.099	0	67.56	78.39	68.415	7.36	4.871	5.285
BGIBMGA003955	yellow	CK_fatbody	gi|512907356|ref|XP_004926421.1| PREDICTED: monocarboxylate transporter 9-like [Bombyx mori]	0	100	-1.47283	4.57691	1.43356e-06	3.53554e-05	NA	NA	NA	NA	NA	NA	NA	NA	NA	NA	NA	NA	8.603	5.689	5.594	0.769	0.7	0.789	31.22	35.777	35.393	1.783	2.702	3.109	1.978	1.755	2.513	0.84	1.175	0.511	14.433	13.386	10.058	2.198	1.724	1.994
BGIBMGA003959	tan	CK_hemocyte	gi|512907371|ref|XP_004926425.1| PREDICTED: sodium-independent sulfate anion transporter-like [Bombyx mori]	4e-65	100	NA	NA	NA	NA	NA	NA	NA	NA	NA	NA	NA	NA	-1.36337	4.76188	6.0998e-06	0.000177238	33.901	24.122	28.418	0	1.499	0.426	35.974	34.89	37.667	0.64	0	0.508	11.385	10.431	10.908	0	4.322	0.075	29.483	34.197	35.228	0	0	0
BGIBMGA003964	turquoise	Toxin_fatbody	gi|512907340|ref|XP_004926417.1| PREDICTED: sodium-independent sulfate anion transporter-like [Bombyx mori]	0	100	1.72757	3.66382	4.7844e-05	0.000767338	NA	NA	NA	NA	NA	NA	NA	NA	NA	NA	NA	NA	13.312	9.216	10.748	0.064	0	0	7.518	3.269	6.235	66.155	74.269	75.803	7.664	9.714	9.013	0	0.628	0	20.703	22.658	17.159	100.535	98.288	85.504
BGIBMGA004013	brown	Toxin_hemocyte	gi|512889943|ref|XP_004922412.1| PREDICTED: LOW QUALITY PROTEIN: 28S ribosomal protein S17, mitochondrial-like [Bombyx mori]	2e-88	81.07	NA	NA	NA	NA	NA	NA	NA	NA	NA	NA	NA	NA	1.24724	6.62355	1.79774e-09	1.03741e-07	52.565	50.757	35.339	83.35	89.381	62.552	113.609	141.911	106.15	233.243	230.834	81.095	117.921	97.086	117.625	70.488	209.603	81.433	76.713	86.644	90.102	156.905	166.761	175.711
BGIBMGA004036	turquoise	CK_fatbody	gi|112983588|ref|NP_001037347.1| vasa-like [Bombyx mori]	0	100	-1.09551	6.52058	8.46429e-09	3.26609e-07	NA	NA	NA	NA	NA	NA	NA	NA	NA	NA	NA	NA	33.546	40.238	42.318	79.558	79.535	79.416	129.273	140.079	132.445	49.868	43.96	43.327	32.723	33.753	32.65	77.536	82.826	83.434	66.494	65.098	63.043	36.697	40.622	33.842
BGIBMGA012989	blue	Toxin_hemocyte	gi|607352368|gb|EZA47339.1| Copia protein [Cerapachys biroi]	9e-40	30.42	NA	NA	NA	NA	NA	NA	NA	NA	NA	NA	NA	NA	7.45391	4.16857	4.32336e-07	1.61431e-05	0	0	0	0.637	0.892	0.169	18.833	0	0	0	0	0	0	36.454	40.453	0	0.444	0.433	0	0	0	27.892	0	0
BGIBMGA004090	turquoise	CK_fatbody,CK_midgut	gi|512890270|ref|XP_004922489.1| PREDICTED: LOW QUALITY PROTEIN: midasin-like [Bombyx mori]	0	99.13	-1.27257	6.88175	7.61756e-13	5.24058e-11	-1.23274	4.45662	7.27685e-06	0.000273661	NA	NA	NA	NA	NA	NA	NA	NA	39.225	33.12	37.529	70.555	69.57	68.201	176.261	187.787	175.814	43.34	43.652	40.784	41.202	42.659	41.151	74.745	75.059	72.519	78.346	76.591	75.761	17.851	16.86	18.419
BGIBMGA006102	pink	CK_midgut,Toxin_hemocyte	gi|512918530|ref|XP_004929156.1| PREDICTED: ragulator complex protein LAMTOR5 homolog [Bombyx mori]	3e-58	100	NA	NA	NA	NA	-5.96847	2.58033	0.0023688	0.0342735	NA	NA	NA	NA	7.87208	4.54789	2.16142e-05	0.00056265	0	0	0	0	0	0	0	0	0	0	0	32.813	101.914	0	0	0	0	0	0	0	0	0	0	0
BGIBMGA004107	yellow	CK_hemocyte	gi|512890337|ref|XP_004922500.1| PREDICTED: high affinity cAMP-specific and IBMX-insensitive 3',5'-cyclic phosphodiesterase 8B-like [Bombyx mori]	0	93.28	NA	NA	NA	NA	NA	NA	NA	NA	NA	NA	NA	NA	-1.04982	4.47078	0.00171055	0.0255715	23.598	18.552	20.478	0.211	0.14	0.301	5.328	3.781	4.075	48.848	50.287	52.664	11.646	10.365	8.512	0.295	0.98	0.112	4.58	3.618	6.018	43.4	34.815	33.538
BGIBMGA000096	pink	CK_midgut,Toxin_hemocyte,Toxin_fatbody	gi|512893226|ref|XP_004923129.1| PREDICTED: calpain-B isoform X4 [Bombyx mori] gi|512893230|ref|XP_004923130.1| PREDICTED: calpain-B isoform X5 [Bombyx mori]	5e-36	98.46	7.38071	3.45766	0.000122982	0.00174731	-8.51287	4.6674	1.47951e-08	1.06222e-06	NA	NA	NA	NA	8.38128	5.00669	5.56651e-06	0.000164641	0	0	0	0	0	0	0	0	0	0	87.35	107.733	145.169	0	0	0	0	0	0	0	83.939	0	0	0
BGIBMGA000017	blue	Toxin_fatbody	gi|112984010|ref|NP_001036833.1| cecropin-D precursor [Bombyx mori] gi|46395627|sp|O76146.1|CECD_BOMMO RecName: Full=Cecropin-D; Flags: Precursor gi|3298433|dbj|BAA31507.1| cecropin D [Bombyx mori]	2e-32	98.36	6.96834	3.27793	1.30626e-11	7.94161e-10	NA	NA	NA	NA	NA	NA	NA	NA	NA	NA	NA	NA	0.433	1.136	0	0	0	0	0	0	0	0	0	0	0.37	0.438	1.3	0	0	0	12.666	32.416	16.454	0	0	1.381
BGIBMGA000022	blue	Toxin_fatbody	no hints			5.50815	2.29358	3.06378e-05	0.000523611	NA	NA	NA	NA	NA	NA	NA	NA	NA	NA	NA	NA	0	0	0	0	0	0	0	0.024	0	0	0	0	0.282	0.878	0.035	0	0	0	7.218	6.773	10.006	0	0	0
BGIBMGA000301	blue	CK_fatbody	gi|512929849|ref|XP_004931924.1| PREDICTED: pancreatic triacylglycerol lipase-like isoform X2 [Bombyx mori]	0	100	-1.59535	4.2278	1.0085e-05	0.000200873	NA	NA	NA	NA	NA	NA	NA	NA	NA	NA	NA	NA	0	0	0.061	2.798	2.184	1.882	25.454	26.99	26.16	5.154	4.26	5.219	0.281	0.005	0.143	2.687	2.554	2.123	8.913	9.031	8.629	2.583	2.68	3.938
BGIBMGA004181	yellow	Toxin_fatbody	gi|512897776|ref|XP_004924236.1| PREDICTED: peroxisomal leader peptide-processing protease-like [Bombyx mori]	6e-124	100	2.93631	3.5089	2.27125e-06	5.30143e-05	NA	NA	NA	NA	NA	NA	NA	NA	NA	NA	NA	NA	11.019	2.59	9.582	11.76	11.277	10.723	0	5.37	2.529	1.877	4.309	0	9.27	2.358	1.597	9.835	11.7	9.013	32.242	5.38	25.677	4.182	4.519	4.101
BGIBMGA004215	brown	Toxin_fatbody	gi|189238911|ref|XP_968839.2| PREDICTED: similar to CG2991 CG2991-PB [Tribolium castaneum]	3e-61	66.67	1.02449	6.76494	5.34715e-09	2.17569e-07	NA	NA	NA	NA	NA	NA	NA	NA	NA	NA	NA	NA	91.084	92.791	83.934	21.304	26.659	22.022	80.289	76.519	88.123	111.385	108.409	106.541	75.134	83.826	64.866	21.571	19.836	19.929	157.005	179.642	179.227	191.441	188.663	165.98
BGIBMGA004221	cyan	CK_fatbody	gi|148298746|ref|NP_001091761.1| glucose-6-phosphate isomerase [Bombyx mori] gi|87248657|gb|ABD36381.1| glucose-6-phosphate isomerase [Bombyx mori]	0	99.81	-1.20392	7.82262	8.86603e-16	7.59935e-14	NA	NA	NA	NA	NA	NA	NA	NA	NA	NA	NA	NA	705.972	721.481	708.927	76.726	77.72	81.604	350.004	343.108	348.752	155.25	163.483	163.034	465.146	443.527	444.958	73.923	82.045	80.366	160.046	153.154	153.778	182.285	156.811	168.139
BGIBMGA000331	pink	Toxin_fatbody	gi|290558786|ref|NP_001166713.1| cuticular protein RR-1 motif 40 precursor [Bombyx mori] gi|223671182|tpd|FAA00543.1| TPA: putative cuticle protein [Bombyx mori]	4e-149	99.52	2.85041	3.08912	7.7562e-07	1.9977e-05	NA	NA	NA	NA	NA	NA	NA	NA	NA	NA	NA	NA	0	0	0	0	0	0	1.72	1.027	2.092	0.236	0.407	0.727	0	0	0.311	0	0	0	16.642	12.893	13.895	0.291	0	0
BGIBMGA004285	brown	Toxin_midgut	gi|226342894|ref|NP_001139709.1| uncharacterized protein LOC100272181 precursor [Bombyx mori]	2e-81	100	NA	NA	NA	NA	1.972	4.16893	2.75952e-10	2.75284e-08	NA	NA	NA	NA	NA	NA	NA	NA	0	0.493	0	2.576	0.78	0.6	0	0.73	0.373	13.016	11.172	7.479	0	0	0	2.24	0.562	0.466	1.632	1.358	0.577	43.626	35.996	44.281
BGIBMGA004287	tan	Toxin_midgut	gi|237649002|ref|NP_001153678.1| uncharacterized protein LOC100301511 precursor [Bombyx mori] gi|225580687|gb|ACN94451.1| hypothetical midgut protein Bm123 [Bombyx mori]	5e-80	100	NA	NA	NA	NA	2.71614	4.19521	1.63273e-16	3.774e-14	NA	NA	NA	NA	NA	NA	NA	NA	2.215	0.594	1.867	0	0	0	1.586	2.848	1.853	6.19	9.301	5.75	2.163	0	6.962	0	0	0	1.047	4.146	2.376	45.383	47.557	46.864
BGIBMGA004288	brown	Toxin_midgut	gi|218505759|ref|NP_001136225.1| uncharacterized protein LOC100216500 precursor [Bombyx mori]	1e-77	100	NA	NA	NA	NA	3.75849	7.38466	5.9715e-81	2.8296e-77	NA	NA	NA	NA	NA	NA	NA	NA	0	0	0.336	0	0	0.202	6.478	0	2.772	41.991	34.644	32.743	0	0	0	0	0	0	0.446	3.316	0.469	500.461	427.433	521.513
BGIBMGA004289	red	Toxin_midgut	gi|218505759|ref|NP_001136225.1| uncharacterized protein LOC100216500 precursor [Bombyx mori]	1e-76	98.35	NA	NA	NA	NA	3.28322	6.14423	1.67066e-44	1.97911e-41	NA	NA	NA	NA	NA	NA	NA	NA	0	0	0	0	0	0	4.459	0.741	0	16.574	18.117	26.413	0	0	0.243	0	0	0	1.531	3.091	0.429	174.067	196.061	223.319
BGIBMGA004290	red	Toxin_midgut	gi|218505759|ref|NP_001136225.1| uncharacterized protein LOC100216500 precursor [Bombyx mori]	1e-77	100	NA	NA	NA	NA	4.29729	5.16678	3.29463e-48	4.46046e-45	NA	NA	NA	NA	NA	NA	NA	NA	0	0	0	0	0	0	1.163	1.656	0.872	6.946	5.639	4.106	0.476	0	0	0	0	0	0.401	0.54	0.533	98.969	97.54	118.334
BGIBMGA004291	brown	Toxin_midgut	gi|218505759|ref|NP_001136225.1| uncharacterized protein LOC100216500 precursor [Bombyx mori]	3e-42	71.07	NA	NA	NA	NA	5.34782	6.37709	1.02011e-85	9.66757e-82	NA	NA	NA	NA	NA	NA	NA	NA	0.45	1.171	0	0	0	0.345	0	1.671	2.367	7.897	5.531	6.363	0.314	1.359	0.6	0.165	0	0.35	0.598	1.72	0.546	264.267	231.502	265.646
BGIBMGA004292	brown	Toxin_midgut	gi|218505759|ref|NP_001136225.1| uncharacterized protein LOC100216500 precursor [Bombyx mori]	2e-45	74.38	NA	NA	NA	NA	4.9566	5.2338	2.28807e-60	4.33681e-57	NA	NA	NA	NA	NA	NA	NA	NA	0.631	0	0	0	0	0	0.499	0.423	0	4.157	3.657	2.938	1.787	1.152	0.083	0	0	0	0.986	0.655	3.851	114.636	107.127	115.428
BGIBMGA004293	turquoise	Toxin_midgut	gi|218505759|ref|NP_001136225.1| uncharacterized protein LOC100216500 precursor [Bombyx mori]	3e-46	74.38	NA	NA	NA	NA	6.366	5.66938	1.49809e-68	4.73247e-65	NA	NA	NA	NA	NA	NA	NA	NA	0.034	0	0.71	0	0	0	0.667	0.399	0	0.386	2.09	2.249	0.149	1.537	0.344	0.097	0.074	0	0.361	1.617	0.466	156.925	158.965	155.055
BGIBMGA004294	purple	Toxin_midgut	gi|512902241|ref|XP_004925327.1| PREDICTED: probable salivary secreted peptide-like [Bombyx mori]	5e-77	100	NA	NA	NA	NA	4.07389	4.43171	5.52321e-31	5.23435e-28	NA	NA	NA	NA	NA	NA	NA	NA	0	0	0	31.506	0	0.184	1.276	1.839	1.605	2.599	3.771	4.015	0	0.562	0.264	31.833	38.736	0	10.614	0	5.227	62.698	59.755	59.351
BGIBMGA004313	green	CK_fatbody	gi|512902341|ref|XP_004925352.1| PREDICTED: facilitated trehalose transporter Tret1-like [Bombyx mori]	3e-156	99.56	-1.97902	6.6517	4.9079e-10	2.38626e-08	NA	NA	NA	NA	NA	NA	NA	NA	NA	NA	NA	NA	0	0	0	0	0	0.202	183.574	148.833	176.954	0.592	1.45	1.791	0	0	0	0.304	0.222	0.186	24.645	80.52	25.541	0.929	0	0.393
BGIBMGA000336	pink	CK_midgut	gi|290563241|ref|NP_001166717.1| cuticular protein RR-1 motif 34 precursor [Bombyx mori] gi|223671170|tpd|FAA00537.1| TPA: putative cuticle protein [Bombyx mori]	4e-146	100	NA	NA	NA	NA	-1.00231	8.07757	5.91482e-13	9.0411e-11	NA	NA	NA	NA	NA	NA	NA	NA	0	0	0	0.232	0	0.186	504.73	569.051	507.618	545.55	563.653	542.046	0	0	0	0	1.25	0	339.333	348.126	297.537	251.244	288.613	271.437
BGIBMGA004348	black	Toxin_fatbody	gi|512936927|ref|XP_004933639.1| PREDICTED: UPF0183 protein CG7083-like [Bombyx mori]	0	97.31	1.5866	3.42916	0.000540605	0.00603964	NA	NA	NA	NA	NA	NA	NA	NA	NA	NA	NA	NA	28.242	30.427	29.357	24.032	23.883	25.529	4.789	5.045	5.138	5.053	4.109	5.165	29.01	27.843	27.813	22.429	25.881	24.898	15.854	14.646	18.431	10.915	14.289	11.904
BGIBMGA004396	salmon	CK_hemocyte	gi|379046476|gb|AFC87799.1| 30K protein 1 [Bombyx mori]	0	100	NA	NA	NA	NA	NA	NA	NA	NA	NA	NA	NA	NA	-4.18297	3.83673	0.00339069	0.0446964	0	0	49.531	0.255	0	0	0	3.063	0	0	0	0	2.462	0	0	0	0	0	0	2.445	0	0	0.365	0
BGIBMGA004397	red	CK_fatbody	gi|525342977|ref|NP_001266309.1| low molecular mass 30 kDa lipoprotein 19G1-like precursor [Bombyx mori] gi|312597592|gb|ADQ89805.1| 30kDa protein [Bombyx mori] gi|379046478|gb|AFC87800.1| 30K protein 2 [Bombyx mori]	0	100	-9.42536	5.79335	2.14856e-59	7.24758e-57	NA	NA	NA	NA	NA	NA	NA	NA	NA	NA	NA	NA	0	0	0	0	0.272	0.098	108.593	105.584	113.757	0	0.085	0.308	0	0	1.981	0	0.513	0.179	0	0	0	0	0	0
BGIBMGA004398	salmon	Toxin_fatbody	gi|525343846|ref|NP_001266375.1| low molecular 30 kDa lipoprotein PBMHPC-19-like precursor [Bombyx mori] gi|379046522|gb|AFC87822.1| 30K protein 24 [Bombyx mori]	1e-176	100	1.06164	8.38636	1.71455e-13	1.23648e-11	NA	NA	NA	NA	NA	NA	NA	NA	NA	NA	NA	NA	0.728	0	0	0	0	0.408	224.895	261.335	253.489	0	0.289	0	0.318	0	0	0	0.884	0.742	532.823	543.872	521.028	0	0	0
BGIBMGA004400	black	CK_hemocyte	gi|568215172|ref|NP_001274758.1| low molecular mass 30 kDa lipoprotein 19G1-like precursor [Bombyx mori] gi|512890676|ref|XP_004922553.1| PREDICTED: low molecular mass 30 kDa lipoprotein 19G1-like [Bombyx mori] gi|379046480|gb|AFC87801.1| 30K protein 3 [Bombyx mori]	0	100	NA	NA	NA	NA	NA	NA	NA	NA	NA	NA	NA	NA	-3.84947	2.95921	2.10902e-05	0.000550747	6.545	7.293	8.715	0	0	0.235	18.655	16.975	16.379	0.205	0	0	0.401	0.513	0.675	0.127	0.136	0	24.722	21.672	28.977	0	0	0.205
BGIBMGA004442	brown	Toxin_fatbody	gi|512890511|ref|XP_004922527.1| PREDICTED: protein wntless-like [Bombyx mori]	0	100	6.70637	3.0934	0.000335024	0.00405011	NA	NA	NA	NA	NA	NA	NA	NA	NA	NA	NA	NA	0	0	0	0	0	0	0	0	0	0	0	0	0	21.314	0	0	0	0	0	50.774	0	0	0	0
BGIBMGA004457	green	CK_hemocyte	gi|379046496|gb|AFC87809.1| 30K protein 11 [Bombyx mori]	5e-147	100	NA	NA	NA	NA	NA	NA	NA	NA	NA	NA	NA	NA	-3.89424	3.55756	1.041e-08	5.08301e-07	12.024	16.476	11.93	0	0	0	57.705	49.542	59.047	0	0	0.304	0.246	1.288	1.314	0	0.238	0.299	61.152	59.363	56.281	0	0	0.373
BGIBMGA004463	turquoise	Toxin_fatbody	gi|512890719|ref|XP_004922561.1| PREDICTED: microvitellogenin-like [Bombyx mori]	0	100	7.65299	3.86299	4.25646e-05	0.000689862	NA	NA	NA	NA	NA	NA	NA	NA	NA	NA	NA	NA	0	0.23	0	0	0	0	0	0	0	0.376	0.469	0	0	0	0	0	0	0.172	0	97.886	0	0	0.333	0
BGIBMGA004464	green	Toxin_fatbody	gi|379046490|gb|AFC87806.1| 30K protein 8 [Bombyx mori]	0	100	9.74354	5.83698	3.70018e-07	1.02633e-05	NA	NA	NA	NA	NA	NA	NA	NA	NA	NA	NA	NA	0	0	1.053	0	0	0.189	0	0	0	0.378	0.321	0.777	0.289	0	0	0	0.207	0	0	419.281	0	0	0.354	0
BGIBMGA004510	black	Toxin_fatbody	gi|512905942|ref|XP_004926072.1| PREDICTED: facilitated trehalose transporter Tret1-like [Bombyx mori]	0	96.16	1.43641	6.49891	2.30736e-14	1.77412e-12	NA	NA	NA	NA	NA	NA	NA	NA	NA	NA	NA	NA	0	0	0	0	0	0.106	50.357	61.42	56.089	0.019	0	0	0	0	0	0.393	1.509	0.048	151.873	153.632	166.996	0.253	0	0.031
BGIBMGA004525	green	Toxin_fatbody	gi|267844867|ref|NP_001161186.1| sugar transporter protein [Bombyx mori] gi|229458987|gb|ACQ66002.1| sugar transporter protein [Bombyx mori]	0	99.67	1.89316	3.11842	0.000511862	0.00578654	NA	NA	NA	NA	NA	NA	NA	NA	NA	NA	NA	NA	0	0	0	0	0	0	2.926	2.824	3.387	0	0	0.232	0.225	0	0	0.069	0.361	0	13.408	10.458	14.612	0.362	0	0
BGIBMGA004546	tan	Toxin_fatbody	gi|512894841|ref|XP_004923527.1| PREDICTED: LOW QUALITY PROTEIN: twitchin-like [Bombyx mori]	0	75.32	2.20389	4.48403	6.94119e-13	4.83894e-11	NA	NA	NA	NA	NA	NA	NA	NA	NA	NA	NA	NA	0.156	0.031	0.031	0.02	0.013	0.016	9.084	8.678	8.912	227.481	231.119	220.244	0.125	0.072	0.074	0.014	0.046	0.007	43.396	40.94	41.665	261.416	262.333	268.446
BGIBMGA004547	brown	Toxin_fatbody	gi|512894841|ref|XP_004923527.1| PREDICTED: LOW QUALITY PROTEIN: twitchin-like [Bombyx mori]	0	97.76	1.60355	4.98957	4.68393e-11	2.56439e-09	NA	NA	NA	NA	NA	NA	NA	NA	NA	NA	NA	NA	1.798	0.858	0.848	0.76	0.723	0.62	17.394	16.033	18.776	201.035	259.301	258.461	0.891	1.243	1.074	0.694	1.122	0.593	56.781	53.457	54.522	277.144	305.966	283.672
BGIBMGA004567	green	CK_midgut	gi|512894805|ref|XP_004923518.1| PREDICTED: facilitated trehalose transporter Tret1-like [Bombyx mori]	0	100	NA	NA	NA	NA	-1.12211	5.42325	2.40072e-08	1.62512e-06	NA	NA	NA	NA	NA	NA	NA	NA	0.684	0.388	0.629	0.209	0.146	0	2.188	1.304	0.897	79.643	91.267	85.176	0.151	0.157	0.388	0.168	0.216	0.091	0.55	1.126	1.022	39.199	39.664	36.652
BGIBMGA000444	blue	CK_fatbody	gi|512930019|ref|XP_004931965.1| PREDICTED: myb-like protein X-like isoform X1 [Bombyx mori]	0	93.98	-1.26212	6.37194	1.26766e-09	5.73847e-08	NA	NA	NA	NA	NA	NA	NA	NA	NA	NA	NA	NA	95.162	81.108	98.157	679.552	682.799	675.939	114.385	142.611	115.08	101.871	101.096	99.924	86.488	84.856	87.783	758.973	688.889	684.845	49.497	52.727	59.295	64.168	64.811	72.474
BGIBMGA004595	brown	Toxin_midgut	gi|512894745|ref|XP_004923503.1| PREDICTED: putative hexokinase HKDC1-like [Bombyx mori]	0	100	NA	NA	NA	NA	1.25135	4.7296	1.16981e-07	7.10659e-06	NA	NA	NA	NA	NA	NA	NA	NA	0.209	0.443	0.478	0.777	0.696	1.443	57.092	45.466	50.325	21.165	22.812	25.022	1.546	2.425	1.606	0.893	0.643	0.586	95.072	105.605	86.396	55.784	55.502	53.05
BGIBMGA004605	turquoise	Toxin_fatbody,Toxin_midgut	gi|148298693|ref|NP_001091794.1| heat shock protein hsp20.8 [Bombyx mori] gi|11120618|gb|AAG30944.1|AF315317_1 heat shock protein hsp20.8 [Bombyx mori] gi|11120622|gb|AAG30946.1|AF315319_1 heat shock protein hsp20.8A [Bombyx mori] gi|221579595|gb|ACM24338.1| heat shock protein 20.8 [Bombyx mori]	9e-14	100	1.04477	5.44953	6.20323e-07	1.62168e-05	1.54471	4.24838	1.16873e-07	7.10659e-06	NA	NA	NA	NA	NA	NA	NA	NA	1048.06	1337.48	1231.19	422.439	413.55	432.111	30.356	33.631	31.065	13.435	9.61	17.587	709.271	640.349	652.817	358.525	397.535	388.1	75.646	56.348	72.276	35.717	41.335	45.029
BGIBMGA004613	brown	Toxin_fatbody,Toxin_midgut	gi|512909705|ref|XP_004926987.1| PREDICTED: heat shock protein 68-like [Bombyx mori]	0	100	3.38849	4.88149	4.31178e-30	6.44118e-28	1.93012	3.38255	5.47927e-06	0.0002162	NA	NA	NA	NA	-2.64846	8.89137	2.32209e-61	4.79047e-58	601.249	714.717	650.523	355.9	369.101	364.035	6.407	4.396	6.191	7.504	6.394	3.819	111.441	106.222	101.522	320.756	325.525	330.08	65.114	60.723	67.555	22.891	19.384	23.203
BGIBMGA004614	brown	CK_hemocyte,Toxin_fatbody,Toxin_midgut	gi|512909701|ref|XP_004926986.1| PREDICTED: heat shock protein 70 A2-like [Bombyx mori]	0	95.85	4.52055	5.90489	2.27024e-60	7.91331e-58	3.22913	3.72933	1.24086e-14	2.26146e-12	NA	NA	NA	NA	-2.41423	8.2645	6.43677e-52	7.58803e-49	402.098	438.784	398.896	327.297	329.128	328.84	6.466	5.823	5.979	3.562	3.883	4.061	77.121	81.589	77.665	278.754	282.231	282.413	136.635	148.034	142.773	28.062	38.749	32.2
BGIBMGA004615	green	CK_hemocyte	gi|512909670|ref|XP_004926978.1| PREDICTED: facilitated trehalose transporter Tret1-like [Bombyx mori]	0	99.8	NA	NA	NA	NA	NA	NA	NA	NA	NA	NA	NA	NA	-1.14924	8.72756	4.84278e-16	7.01098e-14	434.249	491.093	477.887	177.25	189.807	178.583	34	40.73	38.514	646.85	608.757	604.789	213.396	207.393	222.836	173.317	179.242	189.064	26.317	27.736	28.271	318.924	321.678	324.431
BGIBMGA000561	greenyellow	Toxin_midgut	gi|255652897|ref|NP_001157389.1| cold-related protein precursor [Bombyx mori] gi|240129600|gb|ACS44813.1| cold-related protein [Bombyx mori]	5e-36	100	NA	NA	NA	NA	6.26692	5.64847	4.57426e-09	3.64288e-07	NA	NA	NA	NA	NA	NA	NA	NA	1.12	5.352	2.908	0.675	3.009	4.169	2112.9	2276.29	2232.49	2.258	0.923	1.55	3.427	3.015	3.265	3.565	2.848	0.457	3541.01	3517.19	3461.74	0	152.966	288.244
BGIBMGA004636	black	Toxin_fatbody	no hints			1.60526	3.66499	7.44104e-05	0.00113427	NA	NA	NA	NA	NA	NA	NA	NA	NA	NA	NA	NA	5.273	10.163	9.349	3.053	6.519	2.568	6.853	6.983	5.297	3.303	4.771	1.656	13.386	10.523	9.694	3.39	4.998	5.133	16.916	21.076	21.412	3.705	4.457	4.189
BGIBMGA004645	cyan	Toxin_fatbody	gi|112984342|ref|NP_001037211.1| suppressor of profilin 2 [Bombyx mori]	0	99.2	1.6183	3.86758	2.21256e-05	0.000397538	NA	NA	NA	NA	NA	NA	NA	NA	NA	NA	NA	NA	9.987	10.262	8.583	24.714	24.943	23.422	6.687	6.172	8.532	18.052	16.236	11.106	14.425	14.776	12.723	20.005	21.47	17.262	21.403	24.286	26.426	9.555	10.54	7.124
BGIBMGA000624	blue	Toxin_fatbody	gi|18700461|dbj|BAB85198.1| Titin-like protein [Bombyx mori]	0	98.15	1.66904	4.31944	9.86438e-08	3.07e-06	NA	NA	NA	NA	NA	NA	NA	NA	NA	NA	NA	NA	0.084	0.064	0.052	26.365	26.298	26.342	8.944	11.631	10.062	295.419	301.171	284.46	0.143	0.222	0.037	35.546	31.517	31.274	35.887	32.8	33.649	342.968	347.918	375.22
BGIBMGA004699	black	Toxin_midgut	gi|512907717|ref|XP_004926512.1| PREDICTED: kelch-like ECH-associated protein 1-like [Bombyx mori]	0	93.07	NA	NA	NA	NA	1.18024	3.85403	0.000543797	0.010692	NA	NA	NA	NA	NA	NA	NA	NA	9.044	11.767	11.356	17.597	18.136	18.831	9.868	6.621	7.865	13.02	11.275	11.739	12.744	11.631	12.077	13.099	15.715	13.654	10.87	15.897	12.347	27.988	29.208	25.386
BGIBMGA004700	brown	Toxin_hemocyte	gi|512907769|ref|XP_004926525.1| PREDICTED: LOW QUALITY PROTEIN: dual specificity protein phosphatase Mpk3-like [Bombyx mori]	3e-39	100	NA	NA	NA	NA	NA	NA	NA	NA	NA	NA	NA	NA	1.00974	6.61975	5.93238e-08	2.59016e-06	47.549	49.438	56.858	161.355	173.733	161.475	26.663	27.166	32.658	31.12	35.351	37.642	103.944	108.622	103.03	144.436	147.747	134.63	36.923	38.58	41.643	24.446	20.936	30.878
BGIBMGA004711	red	CK_fatbody	gi|512907753|ref|XP_004926521.1| PREDICTED: ruvB-like helicase 1-like [Bombyx mori]	0	100	-1.37723	5.91538	1.99768e-10	1.02905e-08	NA	NA	NA	NA	NA	NA	NA	NA	NA	NA	NA	NA	41.528	53.308	49.696	143.097	143.905	140.746	89.06	89.565	94.989	56.534	56.877	55.128	46.904	50.344	56.91	143.682	138.996	124.843	36.107	33.824	38.574	27.231	28.58	29.151
BGIBMGA004757	black	CK_hemocyte	gi|347971125|ref|XP_003436694.1| AGAP013096-PA [Anopheles gambiae str. PEST] gi|333466600|gb|EGK96308.1| AGAP013096-PA [Anopheles gambiae str. PEST]	1e-06	62.16	NA	NA	NA	NA	NA	NA	NA	NA	NA	NA	NA	NA	-1.10797	4.6424	0.000372698	0.00670045	23.831	25.37	23.467	4.989	3.945	5.499	5.649	5.676	4.123	9.344	7.819	6.531	9.947	13.715	10.147	4.654	4.512	2.961	12.02	10.104	9.593	9.992	9.611	6.55
BGIBMGA004801	magenta	Toxin_midgut	gi|512894416|ref|XP_004923425.1| PREDICTED: zinc carboxypeptidase-like [Bombyx mori]	0	100	NA	NA	NA	NA	1.02856	4.66615	3.11875e-05	0.000969063	NA	NA	NA	NA	NA	NA	NA	NA	0	0	0	0.071	0.016	0	0.089	0.011	0.055	23.903	24.669	24.724	0	0	0	0	0	0	0.534	0.656	0.805	47.599	51.166	49.168
BGIBMGA004850	green	Toxin_cell	gi|358031576|ref|NP_001239599.1| ubiquitin-conjugating enzyme E2 J1-like [Bombyx mori] gi|355525885|gb|AET05794.1| ubiquitin-conjugating enzyme E2 J1-like protein [Bombyx mori]	0	100	NA	NA	NA	NA	NA	NA	NA	NA	8.86813	4.98942	6.00155e-07	0.000371196	NA	NA	NA	NA	0	0	0	0	0	0	0	0	0	0	0	0	0	0	0	133.849	0	0	0	0	0	0	0	0
BGIBMGA004865	purple	CK_fatbody	gi|112983654|ref|NP_001036872.1| Bombyrin precursor [Bombyx mori]	1e-95	78.61	-1.61339	5.44643	1.80304e-12	1.19331e-10	NA	NA	NA	NA	NA	NA	NA	NA	NA	NA	NA	NA	0.966	0.732	0.683	1.31	1.022	1.096	64.247	70.962	65.111	226.982	253.845	214.825	0.66	0.942	0.465	0.869	2.161	1.021	25.213	21.849	19.835	283.561	262.718	283.936
BGIBMGA004869	brown	Toxin_fatbody	gi|357626919|gb|EHJ76814.1| protease inhibitor-like protein [Danaus plexippus]	1e-29	59.3	8.96628	5.05254	5.39628e-52	1.48497e-49	NA	NA	NA	NA	NA	NA	NA	NA	NA	NA	NA	NA	0	0	0.356	0	0	0.34	0	0	0	0.737	0.191	1.107	2.45	0.538	2.132	0	0.622	0	75.691	89.464	83.667	0.428	0	0.927
BGIBMGA004893	salmon	Toxin_fatbody	gi|390178515|ref|XP_001359095.3| GA19674, isoform F [Drosophila pseudoobscura pseudoobscura] gi|388859475|gb|EAL28238.3| GA19674, isoform F [Drosophila pseudoobscura pseudoobscura]	2e-44	45.25	3.1695	5.05968	4.14095e-31	6.66183e-29	NA	NA	NA	NA	NA	NA	NA	NA	NA	NA	NA	NA	25.415	27.203	20.715	0.306	0.178	0	7.677	6.901	8.732	217.061	231.992	232.545	17.966	17.732	15.963	0.04	0.19	0.09	80.921	70.563	64.54	262.08	287.705	235.161
BGIBMGA004894	black	CK_hemocyte,Toxin_fatbody	gi|389610783|dbj|BAM19002.1| fau protein [Papilio polytes]	1e-112	86.76	2.67675	5.39391	4.65474e-30	6.85558e-28	NA	NA	NA	NA	NA	NA	NA	NA	-1.30096	4.35695	0.000260498	0.00508652	18.447	19.188	22.191	0.17	0.478	0.48	12.118	9.849	17.036	182.13	169.719	185.166	8.34	9.402	7.383	0.274	0.158	0.195	91.101	86.636	85.262	194.6	205.396	188.497
BGIBMGA004925	brown	Toxin_midgut	gi|571529446|ref|XP_006567783.1| PREDICTED: general transcriptional corepressor trfA-like isoform X2 [Apis mellifera] gi|571529450|ref|XP_006567784.1| PREDICTED: general transcriptional corepressor trfA-like isoform X3 [Apis mellifera]	1e-12	37.33	NA	NA	NA	NA	5.42418	2.06344	0.00267668	0.0377483	NA	NA	NA	NA	NA	NA	NA	NA	0.523	0	0	0.128	0	0.137	0.339	0.152	1.572	0	0.398	0	0.434	0	0	0	0	0.207	1.001	1.271	1.208	2.239	19.912	0
BGIBMGA004931	tan	Toxin_midgut	gi|512898989|ref|XP_004924533.1| PREDICTED: dimethyladenosine transferase 2, mitochondrial-like [Bombyx mori]	3e-45	100	NA	NA	NA	NA	2.61212	2.55927	8.85306e-05	0.00225539	NA	NA	NA	NA	NA	NA	NA	NA	2.193	1.425	2.053	2.432	78.739	2.625	1.843	2.787	1.071	1.495	2.529	0.813	0.616	3.841	1.123	2.612	2.87	1.331	3.71	1.032	5.01	9.736	15.528	9.379
BGIBMGA004955	turquoise	CK_midgut	gi|226342886|ref|NP_001139705.1| serine protease inhibitor 13 precursor [Bombyx mori] gi|195972028|gb|ACG61176.1| serpin-13 [Bombyx mori]	0	99.61	NA	NA	NA	NA	-1.29991	8.1279	5.09928e-21	1.85869e-18	NA	NA	NA	NA	NA	NA	NA	NA	26.497	24.826	27.847	23.168	26.981	26.803	289.724	296.763	275.485	603.439	595.346	619.768	29.442	27.576	28.597	23.622	25.768	24.076	227.749	217.174	232.996	243.332	229.639	255.855
BGIBMGA000725	greenyellow	Toxin_fatbody	gi|512921632|ref|XP_004929924.1| PREDICTED: multidrug resistance protein homolog 49-like [Bombyx mori]	0	94.79	2.11068	3.11931	0.000117833	0.00168561	NA	NA	NA	NA	NA	NA	NA	NA	NA	NA	NA	NA	0	0	0	0	0	0.045	2.782	2.741	2.503	14.843	14.134	13.282	0	0.016	0	0.024	0.045	0.022	13.302	13.011	14.656	11.873	10.795	12.582
BGIBMGA004983	black	Toxin_fatbody	gi|512898961|ref|XP_004924526.1| PREDICTED: lipopolysaccharide-induced tumor necrosis factor-alpha factor homolog [Bombyx mori]	9e-117	100	2.05491	2.9534	0.000326986	0.0039713	NA	NA	NA	NA	NA	NA	NA	NA	NA	NA	NA	NA	1.58	2.581	2.338	1.904	4.81	2.648	2.952	3.172	0.866	5.031	4.011	4.087	2.397	2.332	2.244	3.66	3.807	2.746	9.689	7.139	18.508	6.604	3.039	1.773
BGIBMGA004994	brown	CK_fatbody,Toxin_midgut	gi|114051193|ref|NP_001040388.1| DNA-directed RNA polymerase II polypeptide [Bombyx mori] gi|95102714|gb|ABF51298.1| DNA-directed RNA polymerase II polypeptide [Bombyx mori]	0	100	-7.30394	3.88532	0.000156536	0.00213694	6.16606	2.5213	0.00126923	0.0209191	NA	NA	NA	NA	NA	NA	NA	NA	0	0	0	0	0	0	75.481	0	0	0	0	0	0	0	0	0	0	0	0	0	0	0	0	36.689
BGIBMGA005005	brown	CK_midgut,Toxin_hemocyte	gi|512887183|ref|XP_004921880.1| PREDICTED: zinc transporter ZIP1-like [Bombyx mori]	2e-177	100	NA	NA	NA	NA	-1.38485	8.47351	6.20181e-22	2.55541e-19	NA	NA	NA	NA	1.14119	5.05805	1.98538e-05	0.000526795	15.278	14.797	17.189	2.677	2.314	2.282	45.351	38.389	38.977	736.013	782.989	836.285	30.823	36.006	37.261	3.009	1.59	2.346	36.158	38.329	33.292	305.89	309.291	274.5
BGIBMGA005012	green	Toxin_hemocyte,Toxin_fatbody,Toxin_midgut	gi|512887439|ref|XP_004921925.1| PREDICTED: ice-structuring glycoprotein-like [Bombyx mori]	2e-83	55.26	2.58725	6.13409	2.16323e-32	3.70835e-30	1.31054	5.91986	4.51683e-11	5.15735e-09	NA	NA	NA	NA	1.51562	6.41607	7.19555e-15	8.86234e-13	42.195	30.834	32.707	26.649	22.399	22.187	24.132	19.911	25.941	49.628	54.71	54.793	101.686	107.171	92.812	27.059	36.308	28.833	152.642	145.826	138	131.705	138.089	122.108
BGIBMGA000757	blue	CK_fatbody	gi|512903893|ref|XP_004925728.1| PREDICTED: protein RRP5 homolog [Bombyx mori]	0	100	-1.32431	4.96459	4.68553e-07	1.27595e-05	NA	NA	NA	NA	NA	NA	NA	NA	NA	NA	NA	NA	17.974	18.831	19.675	24.429	21.679	18.919	44.653	39.119	50.434	21.038	21.963	23.912	25.918	28.463	26.461	21.359	23.47	21.338	16.803	19.651	18.517	13.675	14.398	13.164
BGIBMGA005015	turquoise	CK_fatbody,CK_midgut	gi|297139710|ref|NP_001171911.1| flavin-dependent monooxygenase FMO1 [Bombyx mori] gi|296427829|gb|ADH16746.1| flavin-dependent monooxygenase FMO1A [Bombyx mori]	0	100	-1.14014	5.25742	1.16167e-06	2.88541e-05	-1.22439	4.72853	8.02082e-07	3.89812e-05	NA	NA	NA	NA	NA	NA	NA	NA	0.381	0.467	0.225	12.646	15.271	12.691	52.25	51.916	56.157	52.003	50.317	53.816	0.527	0.618	0.854	13.395	12.752	15.485	22.628	25.25	29.006	21.007	20.769	23.871
BGIBMGA005024	green	Toxin_fatbody	gi|160425399|gb|ABX39543.1| single domain major allergen protein [Gonepteryx rhamni]	4e-93	64.9	1.67097	3.95712	9.48081e-06	0.000189562	NA	NA	NA	NA	NA	NA	NA	NA	NA	NA	NA	NA	0	0.143	0	0	0.184	0.188	1.066	11.316	11.313	6395.1	10943.5	11557.8	0	0	0.503	0	0.068	0.016	30.276	23.659	21.943	17549.2	18030.9	18466.1
BGIBMGA000788	blue	CK_midgut	gi|114052274|ref|NP_001040467.1| copper transporter [Bombyx mori] gi|95103022|gb|ABF51452.1| copper transporter [Bombyx mori]	8e-127	99.43	NA	NA	NA	NA	-1.00277	12.3928	4.80795e-18	1.30185e-15	NA	NA	NA	NA	NA	NA	NA	NA	766.422	759.626	737.4	0.073	0	0	88.584	99.513	105.322	11019.7	11247.3	11028.5	619.121	604.602	575.803	0.067	1.423	0.336	86.499	79.004	77.998	5500.64	5556.91	5317.99
BGIBMGA005083	brown	Toxin_cell	gi|512886631|ref|XP_004921790.1| PREDICTED: homeobox protein prospero [Bombyx mori]	0	91.62	NA	NA	NA	NA	NA	NA	NA	NA	7.17961	3.68439	7.61399e-05	0.0230879	NA	NA	NA	NA	0	0	0	0	0	0	0	7.702	8.665	0.513	0	0.386	0	0	0	0	0	40.522	7.407	7.017	7.7	0.147	0.429	0.687
BGIBMGA005094	brown	CK_midgut	gi|512887218|ref|XP_004921886.1| PREDICTED: ATP-binding cassette sub-family G member 1-like [Bombyx mori]	0	98.24	NA	NA	NA	NA	-1.61798	5.90079	8.66946e-15	1.64321e-12	NA	NA	NA	NA	NA	NA	NA	NA	63.402	61.385	59.668	0.043	0	0.204	26.753	28.292	28.071	131.687	134.295	129.224	54.006	48.733	49.57	0	0.765	0.062	30.865	31.876	32.37	42.046	42.575	41.813
BGIBMGA005099	yellow	CK_midgut	no hints			NA	NA	NA	NA	-5.74381	2.42592	0.00343532	0.0459097	NA	NA	NA	NA	NA	NA	NA	NA	0	0	0	0	0	0	0	0	0	0	0	27.495	0	0	0	0	0	0	0	0	0	0	0	0
BGIBMGA005133	magenta	CK_hemocyte	gi|568253093|gb|ETN62299.1| putative odorant receptor [Anopheles darlingi]	3e-17	62.5	NA	NA	NA	NA	NA	NA	NA	NA	NA	NA	NA	NA	-1.54371	4.68086	1.00416e-06	3.48165e-05	24.342	23.564	33.24	0	0.893	0.911	0.942	0.426	0.421	0	0.522	0	7.518	8.988	12.168	0	1.067	0.724	0	0.599	0	0	0.573	0.619
BGIBMGA005140	salmon	Toxin_fatbody,Toxin_midgut	gi|512886842|ref|XP_004921826.1| PREDICTED: transcription factor kayak, isoforms D/sro-like isoform X3 [Bombyx mori]	0	100	2.59508	6.20595	2.07561e-34	3.80783e-32	1.08546	6.81109	1.97502e-11	2.33965e-09	NA	NA	NA	NA	NA	NA	NA	NA	132.978	144.532	149.553	30.252	25.883	27.628	24.984	24.577	23.549	104.572	113.175	115.091	228.751	222.375	208.274	25.741	26.511	26.989	155.312	151.99	154.175	249.403	221.989	227.074
BGIBMGA005149	red	CK_hemocyte	gi|91089977|ref|XP_973893.1| PREDICTED: similar to CG12811 CG12811-PA [Tribolium castaneum]	9e-35	41.01	NA	NA	NA	NA	NA	NA	NA	NA	NA	NA	NA	NA	-2.08445	7.67761	9.65411e-36	4.97911e-33	263.886	251.294	274.846	1.437	1.265	2.608	464.594	418.598	388.344	4.472	23.892	2.837	62.01	59.313	66.726	0.583	2.124	1.164	502.027	514.378	522.75	21.118	15.999	4.259
BGIBMGA005150	yellow	CK_hemocyte	gi|512887338|ref|XP_004921907.1| PREDICTED: LOW QUALITY PROTEIN: inversin-A-like [Bombyx mori]	0	99.46	NA	NA	NA	NA	NA	NA	NA	NA	NA	NA	NA	NA	-1.41822	3.67098	0.00290463	0.0393842	13.6	9.881	11.977	0.093	0.173	0.067	2.939	3.218	2.959	0.612	1.039	0.842	4.06	4.298	4.215	0.037	0.073	0	4.321	4.058	4.271	0.96	1.417	1.232
BGIBMGA005181	yellow	CK_hemocyte	gi|512908989|ref|XP_004926812.1| PREDICTED: alpha,alpha-trehalose-phosphate synthase [UDP-forming] A-like [Bombyx mori]	1e-59	100	NA	NA	NA	NA	NA	NA	NA	NA	NA	NA	NA	NA	-2.37569	4.68132	4.29761e-12	3.85477e-10	30.931	26.093	35.814	15.847	11.644	12.114	107.526	104.435	119.742	0.894	0.452	0.73	6.115	4.264	7.349	12.041	15.577	16.554	142.041	173.044	131.505	0	0.735	0
BGIBMGA000861	blue	Toxin_fatbody	no hints			1.34461	3.37437	0.00368171	0.0302908	NA	NA	NA	NA	NA	NA	NA	NA	NA	NA	NA	NA	132.885	150.56	136.726	0.072	0.386	0	5.032	6.449	4.667	1.649	3.632	2.64	138.128	131.486	132.205	0.189	0.752	0.067	14.644	16.368	10.962	5.201	4.156	3.423
BGIBMGA005183	cyan	CK_midgut	gi|512908985|ref|XP_004926811.1| PREDICTED: putative mediator of RNA polymerase II transcription subunit 26-like [Bombyx mori]	0	99.79	NA	NA	NA	NA	-2.64048	2.83093	0.00221827	0.0325931	NA	NA	NA	NA	NA	NA	NA	NA	3.985	0	2.782	0.816	0.986	1.887	0	3.113	3.354	32.155	5.613	5.35	3.699	7.033	10.893	1.786	2.254	3.169	4.906	4.68	4.525	0	3.623	1.852
BGIBMGA005204	turquoise	Toxin_fatbody	gi|512908922|ref|XP_004926796.1| PREDICTED: etoposide-induced protein 2.4 homolog [Bombyx mori]	8e-179	100	1.23085	6.63217	1.16142e-11	7.14412e-10	NA	NA	NA	NA	NA	NA	NA	NA	NA	NA	NA	NA	7.843	18.72	18.532	12.92	21.53	16.746	71.978	66.015	63.871	33.683	41.095	41.641	18.705	19.844	18.522	15.61	11.931	19.11	169.543	170.298	150.516	51.073	47.306	50.461
BGIBMGA005224	turquoise	Toxin_hemocyte	gi|512907994|ref|XP_004926573.1| PREDICTED: synaptic vesicle 2-related protein-like [Bombyx mori]	2e-96	100	NA	NA	NA	NA	NA	NA	NA	NA	NA	NA	NA	NA	1.3432	5.01705	9.67231e-07	3.36776e-05	13.102	13.611	13.418	3.821	3.52	3.434	38.258	38.003	39.676	54.526	56.432	57.518	31.619	39.147	34.596	2.699	4.33	2.776	59.714	66.636	58.415	37.642	47.829	39.706
BGIBMGA005227	turquoise	CK_hemocyte	gi|357625827|gb|EHJ76132.1| putative abc transporter [Danaus plexippus]	3e-29	58.82	NA	NA	NA	NA	NA	NA	NA	NA	NA	NA	NA	NA	-2.31029	3.16246	0.000536047	0.00935192	6.155	5.734	11.238	0.257	0	0.048	28.451	23.307	25.219	9.257	9.633	10.051	2.352	1.419	1.7	0.531	0.776	0.435	34.297	23.229	24.168	12.508	13.345	15.45
BGIBMGA005249	turquoise	CK_midgut	gi|512897336|ref|XP_004924128.1| PREDICTED: GTP-binding protein 128up-like isoform X2 [Bombyx mori]	1e-167	99.16	NA	NA	NA	NA	-1.09357	5.9529	4.36009e-08	2.81092e-06	NA	NA	NA	NA	NA	NA	NA	NA	48.427	53.127	57.769	95.932	99.387	103.274	111.945	116.56	117.709	126.437	125.579	120.987	46.821	45.402	43.702	101.965	96.141	97.08	66.315	77.318	75.11	61.32	54.202	57.169
BGIBMGA005262	red	Toxin_fatbody	gi|512897312|ref|XP_004924122.1| PREDICTED: 4-hydroxyphenylpyruvate dioxygenase-like [Bombyx mori]	0	100	2.88377	2.63806	0.000121732	0.00173462	NA	NA	NA	NA	NA	NA	NA	NA	NA	NA	NA	NA	0	0	0	0.704	1.349	0.778	1.457	1.283	0.912	0.268	0.233	0.783	0.212	0	0	1.283	0.967	1.253	8.234	10.79	9.143	0	0.248	0
BGIBMGA005266	purple	Toxin_hemocyte,Toxin_fatbody	gi|357616868|gb|EHJ70454.1| cytochrome P450 333B11 [Danaus plexippus]	2e-86	54.84	1.28618	5.2786	2.78734e-09	1.20443e-07	NA	NA	NA	NA	NA	NA	NA	NA	1.79657	4.85004	2.36468e-09	1.32744e-07	9.68	10.611	8.227	8.113	10.053	6.904	27.764	25.822	22.156	64.423	57.694	60.975	34.113	32.932	33.141	8.97	9.582	8.692	65.693	62.792	63.444	77.379	73.353	66.184
BGIBMGA000980	blue	Toxin_fatbody	gi|512914024|ref|XP_004928038.1| PREDICTED: TIP41-like protein-like [Bombyx mori]	8e-81	98.35	1.20464	4.28675	0.000231271	0.00297832	NA	NA	NA	NA	NA	NA	NA	NA	NA	NA	NA	NA	17.706	1.579	33.205	2.045	121.033	0.426	19.196	2.473	16.001	27.611	36.908	0.28	1.516	14.768	15.99	85.64	126	120.964	27.506	31.506	28.624	0	40.694	37.168
BGIBMGA001030	blue	Toxin_fatbody	gi|225346693|gb|ACN86369.1| troponin I transcript variant B [Bombyx mandarina]	4e-72	99.16	2.48498	8.06211	8.51875e-50	2.22701e-47	NA	NA	NA	NA	NA	NA	NA	NA	NA	NA	NA	NA	0	0.51	0.523	0	0.011	0	81.16	93.587	105.303	1985.83	1953.07	2085.15	0.592	0.515	0.891	0.425	0.411	0	544.07	570.009	511.673	2718.52	2776.21	2589.97
BGIBMGA005298	black	Toxin_hemocyte	gi|512931130|ref|XP_004932233.1| PREDICTED: gamma-glutamyltranspeptidase 1-like [Bombyx mori]	4e-44	100	NA	NA	NA	NA	NA	NA	NA	NA	NA	NA	NA	NA	1.12486	4.31028	0.00214194	0.0303178	8.877	9.862	5.758	49.029	51.659	48.572	1.877	0.925	1.817	0.816	1.229	0.683	20.699	16.61	20.634	50.168	48.402	46.263	2.883	5.136	5.085	1.032	1.052	1.711
BGIBMGA001031	blue	Toxin_fatbody	gi|225346691|gb|ACN86368.1| troponin I transcript variant A [Bombyx mandarina]	9e-63	92.59	2.38472	6.60883	4.3494e-34	7.84168e-32	NA	NA	NA	NA	NA	NA	NA	NA	NA	NA	NA	NA	0.229	0.305	0.193	0.129	0.224	0.135	35.7	36.83	36.753	970.351	956.31	926.821	0.641	0.325	0.118	0.241	0.31	0.259	195.672	210.16	188.344	1233.8	1205.86	1342.04
BGIBMGA005313	turquoise	CK_hemocyte	gi|108880992|gb|EAT45217.1| AAEL003495-PA, partial [Aedes aegypti]	4e-17	35.19	NA	NA	NA	NA	NA	NA	NA	NA	NA	NA	NA	NA	-2.37735	4.40281	1.04364e-09	6.37157e-08	18.952	25.665	27.909	1.109	9.758	0.265	17.252	2.389	1.143	10.488	0.382	0.368	2.041	2.847	9.548	27.151	1.127	0.784	15.532	0	2.654	0	1.491	8.303
BGIBMGA005318	magenta	Toxin_fatbody	gi|512930978|ref|XP_004932194.1| PREDICTED: ras guanine nucleotide exchange factor L-like [Bombyx mori]	0	100	1.38471	3.84534	0.000291377	0.00360157	NA	NA	NA	NA	NA	NA	NA	NA	NA	NA	NA	NA	0.378	0.156	0.504	7.408	8.236	8.69	8.372	8.102	7.817	1857.09	1808	1791.77	0.351	0.523	0.757	8.224	7.76	8.238	22.549	23.572	19.512	1521.65	1560.81	1553.14
BGIBMGA005333	brown	Toxin_hemocyte	gi|512930862|ref|XP_004932165.1| PREDICTED: LOW QUALITY PROTEIN: G protein-coupled receptor kinase 1-like [Bombyx mori]	0	94.98	NA	NA	NA	NA	NA	NA	NA	NA	NA	NA	NA	NA	1.45641	6.79941	3.164e-15	4.14434e-13	48.774	46.542	45.832	23.027	24.587	20.984	25.294	23.828	28.214	26.37	36.948	37.714	133.916	132.396	126.434	23.834	27.682	24.461	30.216	31.212	30.027	29.394	26.211	27.303
BGIBMGA005341	cyan	Toxin_hemocyte	gi|512930818|ref|XP_004932154.1| PREDICTED: formin-like protein 3-like isoform X2 [Bombyx mori]	9e-129	100	NA	NA	NA	NA	NA	NA	NA	NA	NA	NA	NA	NA	5.00137	3.72709	1.83292e-05	0.000494289	1.751	0	0	0.24	0.578	0.798	1.309	2.243	0	0.595	0.515	0.476	0.446	23.647	27.24	0	0	0.249	0.518	1.096	0.811	1.978	1.45	2.335
BGIBMGA005345	red	Toxin_fatbody	gi|512930762|ref|XP_004932140.1| PREDICTED: calcium-binding protein E63-1-like isoform X1 [Bombyx mori] gi|512930766|ref|XP_004932141.1| PREDICTED: calcium-binding protein E63-1-like isoform X2 [Bombyx mori]	8e-111	77.83	1.02036	4.32484	0.000941528	0.00966198	NA	NA	NA	NA	NA	NA	NA	NA	NA	NA	NA	NA	2.783	4.625	3.976	0.299	0.142	0.436	13.573	15.676	13.405	92.487	83.299	90.917	9.59	7.99	10.697	0.104	1.287	0.291	33.566	26.968	26.366	108.324	96.08	93.099
BGIBMGA005353	green	Toxin_hemocyte,Toxin_fatbody,Toxin_midgut	gi|571560274|ref|XP_006566528.1| PREDICTED: uncharacterized protein LOC725324 isoform X2 [Apis mellifera]	1e-62	43.31	1.16726	6.69434	5.53506e-11	3.01023e-09	1.63611	4.50209	7.37578e-10	6.78643e-08	NA	NA	NA	NA	1.2438	5.84412	4.97357e-10	3.23165e-08	24.146	28.02	25.944	88.135	91.752	90.301	80.954	65.998	70.805	17.359	15.861	16.027	63.44	66.282	61.313	85.199	89.799	92.2	165.828	170.024	172.503	49.099	52.514	49.827
BGIBMGA005354	black	Toxin_hemocyte,Toxin_fatbody	gi|512930727|ref|XP_004932131.1| PREDICTED: transducin beta-like protein 2-like [Bombyx mori]	2e-43	100	1.01277	5.63711	4.49788e-06	9.79172e-05	NA	NA	NA	NA	NA	NA	NA	NA	1.38516	3.87106	0.00262127	0.0360512	4.51	9.019	2.588	32.199	35.782	33.331	25.112	42.878	42.056	5.519	4.263	3.485	15.732	11.88	15.063	30.682	38.331	39.55	67.377	81.938	85.017	3.494	3.656	5.328
BGIBMGA005357	yellow	Toxin_hemocyte	gi|512931340|ref|XP_004932278.1| PREDICTED: protein alan shepard-like [Bombyx mori]	0	99.71	NA	NA	NA	NA	NA	NA	NA	NA	NA	NA	NA	NA	1.35907	7.03424	4.84832e-14	5.39556e-12	60.864	54.705	59.656	35.112	32.187	30.026	57.82	51.435	46.067	82.253	69.326	69.599	161.014	158.198	137.391	32.704	30.434	30.446	46.618	54.029	41.712	70.419	60.754	71.844
BGIBMGA005367	red	Toxin_hemocyte	gi|512930640|ref|XP_004932109.1| PREDICTED: cell cycle checkpoint protein RAD17-like isoform X1 [Bombyx mori]	2e-82	100	NA	NA	NA	NA	NA	NA	NA	NA	NA	NA	NA	NA	5.91901	3.00487	6.65363e-05	0.00151673	0	0.11	0.465	0.735	24.728	0.271	0.143	0	15.054	10.976	0	8.458	11.233	0.329	14.546	27.758	27.356	0.594	11.679	1.342	0	1.157	16.381	0
BGIBMGA001092	blue	Toxin_fatbody,Toxin_midgut	gi|108869666|gb|EAT33891.1| AAEL013840-PA [Aedes aegypti]	7e-07	32.76	2.62023	4.48719	2.10796e-16	1.90026e-14	2.06459	3.79362	8.93522e-09	6.66764e-07	NA	NA	NA	NA	NA	NA	NA	NA	0	0.084	0	0.69	0.249	0.241	5.889	7.301	7.267	7.726	8.099	7.656	0.591	0.921	0.565	0.286	0.221	0.361	44.207	48.961	41.332	27.361	32.345	32.378
BGIBMGA005428	red	CK_fatbody	gi|183979390|dbj|BAG30747.1| similar to CG10712-PA [Papilio xuthus]	1e-28	61.54	-1.09704	4.95021	2.41033e-05	0.000424324	NA	NA	NA	NA	NA	NA	NA	NA	NA	NA	NA	NA	32.757	44.041	42.685	80.452	77.78	75.658	43.677	34.512	49.385	47.994	45.056	45.465	43.488	53.652	45.265	66.551	77.832	78.79	19.924	22.655	19.176	32.222	28.929	32.011
BGIBMGA005436	salmon	Toxin_fatbody	gi|512930633|ref|XP_004932107.1| PREDICTED: protein spinster-like isoform X2 [Bombyx mori]	1e-39	100	1.23019	5.99131	3.15043e-09	1.35572e-07	NA	NA	NA	NA	NA	NA	NA	NA	NA	NA	NA	NA	41.284	43.772	46.146	94.508	100.389	107.625	45.008	41.049	42.249	106.266	99.103	104.782	38.385	45.079	51.349	98.024	92.539	99.612	104.682	97.097	115.014	144.752	146.107	173.516
BGIBMGA005446	cyan	CK_cell,CK_fatbody	gi|512930683|ref|XP_004932120.1| PREDICTED: UPF0454 protein C12orf49 homolog [Bombyx mori]	3e-80	100	-3.93747	3.52421	0.000125614	0.00177746	NA	NA	NA	NA	-4.95599	3.35388	4.62079e-06	0.00250071	NA	NA	NA	NA	25.304	19.24	22.423	16.427	0.604	15.418	29.871	22.984	0	26.094	0.968	0.325	21.495	22.683	17.153	0.17	0.236	0.601	1.457	0.88	0.621	21.044	20.282	24.221
BGIBMGA005447	brown	Toxin_fatbody	gi|379698922|ref|NP_001243932.1| gamma-glutamyl transpeptidase [Bombyx mori] gi|338858984|gb|AEJ33054.1| gamma-glutamyl transpeptidase [Bombyx mori]	0	98.99	2.13974	3.92604	1.39677e-08	5.14298e-07	NA	NA	NA	NA	NA	NA	NA	NA	NA	NA	NA	NA	0.348	0.94	0.27	16.81	17.35	16.856	5.21	5.587	6.729	298.087	319.484	276.483	0.569	0.64	0.884	14.285	17.587	18.248	28.48	27.654	24.913	271.583	284.854	253.636
BGIBMGA005449	brown	CK_fatbody	gi|512931320|ref|XP_004932273.1| PREDICTED: DNA repair protein RAD50-like [Bombyx mori]	0	97.48	-1.07367	6.362	5.84609e-08	1.90927e-06	NA	NA	NA	NA	NA	NA	NA	NA	NA	NA	NA	NA	148.147	135.674	142.734	65.11	67.409	66.94	113.876	127.428	116.887	87.64	81.681	75.136	145.253	153.396	150.4	78.27	72.236	70.825	62.212	59.536	51.52	55.77	57.304	63.095
BGIBMGA005475	yellow	CK_hemocyte	gi|512930870|ref|XP_004932167.1| PREDICTED: uncharacterized protein LOC101741832 isoform X1 [Bombyx mori] gi|512930874|ref|XP_004932168.1| PREDICTED: uncharacterized protein LOC101741832 isoform X2 [Bombyx mori]	0	100	NA	NA	NA	NA	NA	NA	NA	NA	NA	NA	NA	NA	-1.0348	4.68198	0.000686773	0.0117741	23.207	25.033	25.898	121.373	123.274	131.098	320.28	314.962	325.017	71.951	77.019	77.615	11.628	11.149	13.802	116.536	124.265	126.944	427.275	443.944	419.903	98.971	113.476	113.844
BGIBMGA005482	black	CK_fatbody	gi|512930910|ref|XP_004932177.1| PREDICTED: uncharacterized protein LOC101743138 isoform X1 [Bombyx mori] gi|512930914|ref|XP_004932178.1| PREDICTED: uncharacterized protein LOC101743138 isoform X2 [Bombyx mori]	0	100	-2.27354	4.29181	1.25365e-09	5.69975e-08	NA	NA	NA	NA	NA	NA	NA	NA	NA	NA	NA	NA	0.162	0	0	3.179	3.364	3.659	25.981	30.387	33.908	0.899	1.165	1.056	0	0.143	0	3.185	3.346	3.945	6.215	7.012	5.771	0.102	0.425	0.145
BGIBMGA001136	blue	CK_cell	gi|148298671|ref|NP_001091763.1| signal peptidase complex subunit 3 [Bombyx mori] gi|95102772|gb|ABF51327.1| signal peptidase complex subunit 3 [Bombyx mori]	2e-70	100	NA	NA	NA	NA	NA	NA	NA	NA	-5.96378	5.39217	9.82212e-06	0.00404999	NA	NA	NA	NA	3.006	172.895	2.293	1.124	1.708	159.036	6.936	474.407	7.559	314.803	2.543	3.125	6.843	162.137	2.622	1.141	0.663	0.826	406.886	11.046	361.886	258.929	241.277	250.159
BGIBMGA005564	red	CK_fatbody,CK_midgut	gi|512887748|ref|XP_004921974.1| PREDICTED: ribosome biogenesis regulatory protein homolog [Bombyx mori]	0	100	-1.01362	6.58517	9.75018e-08	3.04351e-06	-1.07497	5.94972	6.57623e-08	4.12735e-06	NA	NA	NA	NA	NA	NA	NA	NA	67.941	78.233	75.931	438.767	471.882	468.404	135.295	150.179	128.318	132.003	119.037	120.242	89.923	87.175	93.485	497.302	483.219	473.009	72.037	64.325	76.47	56.637	58.244	59.604
BGIBMGA005574	turquoise	CK_hemocyte	gi|512888119|ref|XP_004922036.1| PREDICTED: zinc finger protein 567-like [Bombyx mori]	3e-51	100	NA	NA	NA	NA	NA	NA	NA	NA	NA	NA	NA	NA	-2.63134	4.37172	1.96982e-10	1.36596e-08	22.794	26.176	25.017	26.493	26.139	28.441	2.054	3.251	3.848	3.843	5.286	6.321	12	0	0.359	25.235	29.702	23.258	4.966	3.108	6.78	0	9.092	7.281
BGIBMGA005582	tan	Toxin_fatbody	gi|379698900|ref|NP_001243921.1| SOCS2-12 protein [Bombyx mori] gi|326632043|gb|ADZ99024.1| SOCS2-12 [Bombyx mori]	0	99.22	1.21755	4.66092	5.06015e-06	0.000107988	NA	NA	NA	NA	NA	NA	NA	NA	NA	NA	NA	NA	4.989	5.977	5.763	15.666	11.129	12.172	17.359	15.902	15.042	19.387	18.36	20.332	9.292	11.74	11.563	12.798	13.56	13.381	35.515	42.937	42.064	39.136	31.24	33.824
BGIBMGA001182	greenyellow	Toxin_fatbody	gi|512913190|ref|XP_004927836.1| PREDICTED: uncharacterized protein LOC101737730 isoform X2 [Bombyx mori]	0	99.85	1.20491	8.00159	1.525e-16	1.39885e-14	NA	NA	NA	NA	NA	NA	NA	NA	NA	NA	NA	NA	255.868	214.623	233.12	184.844	179.054	181.62	173.726	186.528	170.664	34.742	39.39	36.528	385.536	369.907	354.863	199.491	215.77	215.077	430.34	425.928	407.813	51.751	49.809	51.046
BGIBMGA005599	tan	Toxin_fatbody	gi|512887474|ref|XP_004921931.1| PREDICTED: SLIT and NTRK-like protein 6-like [Bombyx mori]	4e-125	100	2.21419	5.89783	1.72904e-24	2.23217e-22	NA	NA	NA	NA	NA	NA	NA	NA	NA	NA	NA	NA	0	0	0	2.692	1.859	1.875	22.952	28.99	20.968	805.642	793.694	809.352	0	0	0.013	0.511	2.27	2.235	123.95	112.895	115.667	832.645	829.367	849.418
BGIBMGA005607	green	CK_fatbody	gi|389612914|dbj|BAM19853.1| unknown unsecreted protein [Papilio xuthus]	1e-06	37.1	-1.13789	5.38831	1.90863e-07	5.60632e-06	NA	NA	NA	NA	NA	NA	NA	NA	NA	NA	NA	NA	204.038	212.303	210.203	0.208	0.791	0.394	63.797	55.05	58.512	4.492	1.634	5.185	228.017	208.709	199.884	0	0.559	0	26.839	26.89	29.641	1.435	2.407	1.634
BGIBMGA005614	green	Toxin_midgut	gi|512888098|ref|XP_004922032.1| PREDICTED: TBC1 domain family member 16-like [Bombyx mori]	0	100	NA	NA	NA	NA	1.62107	4.49222	1.12755e-09	9.71435e-08	NA	NA	NA	NA	NA	NA	NA	NA	4.997	5.923	6.838	0.934	1.249	1.451	2.37	1.502	2.552	17.886	15.996	15.511	7.888	7.732	9.228	1.194	1.19	0.862	4.281	2.937	1.514	47.857	48.611	51.036
BGIBMGA005658	turquoise	Toxin_hemocyte,Toxin_fatbody	gi|112982697|ref|NP_001037683.1| gloverin 2 precursor [Bombyx mori] gi|82949290|dbj|BAE53372.1| antibacterial peptide [Bombyx mori]	1e-123	100	4.94812	11.5034	4.13614e-223	4.32516e-219	NA	NA	NA	NA	NA	NA	NA	NA	1.1621	7.9759	9.06516e-15	1.08414e-12	120.276	123.153	129.137	22.127	24.207	27.989	218.374	186.245	215.711	225.015	229.62	202.238	302.599	269.084	277.027	21.099	25.366	25.067	6569.37	6661.92	6585.3	301.63	318.73	317.687
BGIBMGA005722	purple	Toxin_hemocyte	gi|512909029|ref|XP_004926822.1| PREDICTED: endothelin-converting enzyme 1-like [Bombyx mori]	0	97.31	NA	NA	NA	NA	NA	NA	NA	NA	NA	NA	NA	NA	3.14332	3.00444	0.000121684	0.00255506	0.658	0.909	0.76	7.987	7.698	7.863	14.685	15.128	16.939	72.188	74.74	65.058	7.856	7.293	7.941	7.901	8.248	6.748	21.734	29.456	22.065	96.257	94.883	96.361
BGIBMGA005779	salmon	CK_hemocyte	gi|512896240|ref|XP_004923864.1| PREDICTED: zinc transporter 2-like isoform X1 [Bombyx mori]	0	100	NA	NA	NA	NA	NA	NA	NA	NA	NA	NA	NA	NA	-1.18095	4.34139	0.000926058	0.014984	20.213	21.397	17.085	0	0.055	0	8.105	7.366	10.512	44.196	48.202	54.52	6.032	10.468	9.507	0	0.089	0.138	11.394	13.957	15.827	69.817	73.922	62.897
BGIBMGA005786	brown	Toxin_fatbody	gi|153791757|ref|NP_001093275.1| myo-inositol oxygenase [Bombyx mori] gi|95102966|gb|ABF51424.1| myo-inositol oxygenase [Bombyx mori]	0	100	4.37015	3.65378	4.30568e-16	3.78357e-14	NA	NA	NA	NA	NA	NA	NA	NA	NA	NA	NA	NA	0	0.144	0	0	0	0.132	1.633	0.839	1.54	1164.86	1200.03	1239.52	0.256	0.21	0.38	0	0	0	25.827	26.21	28.54	2343.51	2355.82	2305.52
BGIBMGA005789	red	Toxin_fatbody	gi|512896255|ref|XP_004923868.1| PREDICTED: transmembrane protein 205-like [Bombyx mori]	1e-32	92.06	1.54297	4.77013	3.53405e-09	1.49618e-07	NA	NA	NA	NA	NA	NA	NA	NA	NA	NA	NA	NA	13.129	17.519	18.984	0	0.442	0.739	17.045	14.441	15.47	114.349	117.279	122.37	12.066	16.983	19.891	0.507	0.488	0.397	47.245	45.487	46.465	149.976	168.624	148.594
BGIBMGA001283	blue	CK_fatbody,CK_midgut	gi|512914301|ref|XP_004928108.1| PREDICTED: protein MAK16 homolog [Bombyx mori]	9e-135	100	-1.12287	5.82484	1.2804e-07	3.88092e-06	-1.18002	4.9609	2.41535e-07	1.37068e-05	NA	NA	NA	NA	NA	NA	NA	NA	20.463	25.212	26.948	90.519	82.309	85.552	74.109	84.283	86.279	61.974	69.484	52.359	29.24	47.852	36.106	112.019	91.845	94.426	48.067	35.31	31.932	31.116	21.521	28.499
BGIBMGA001333	blue	Toxin_fatbody	gi|389610911|dbj|BAM19066.1| urate oxidase [Papilio polytes]	0	83.19	1.55691	8.54392	4.34948e-29	6.23048e-27	NA	NA	NA	NA	NA	NA	NA	NA	NA	NA	NA	NA	0	0.198	0	0.227	0.559	0	223.836	214.679	211.161	0.297	0.506	0.887	0	0	0	0.311	0	0.193	638.615	679.668	656.826	0.696	1.583	1.167
BGIBMGA005897	turquoise	CK_hemocyte,CK_fatbody	gi|512899761|ref|XP_004924726.1| PREDICTED: spermidine synthase-like isoform X1 [Bombyx mori] gi|512899765|ref|XP_004924727.1| PREDICTED: spermidine synthase-like isoform X2 [Bombyx mori]	0	100	-1.39572	6.19897	2.01202e-11	1.1754e-09	NA	NA	NA	NA	NA	NA	NA	NA	-1.29753	8.84423	6.42387e-18	1.08201e-15	456.881	551.457	559.806	10.34	9.536	9.505	116.285	113.204	106.26	37.545	36.299	36.59	220.978	213.567	214.614	9.117	11.519	7.841	42.671	41.927	48.436	31.232	27.056	22.946
BGIBMGA005950	red	CK_fatbody	gi|512919431|ref|XP_004929380.1| PREDICTED: putative leucine-rich repeat-containing protein DDB_G0290503-like [Bombyx mori]	0	75.46	-1.18096	4.74799	3.82964e-05	0.000631307	NA	NA	NA	NA	NA	NA	NA	NA	NA	NA	NA	NA	35.868	33.393	34.363	30.504	33.226	32.623	35.142	40.951	34.261	32.831	31.085	28.313	37.745	39.471	38.362	36.033	36.311	34.272	17.277	16.154	17.487	22.345	22.191	23.071
BGIBMGA005959	brown	Toxin_hemocyte	gi|512919425|ref|XP_004929377.1| PREDICTED: triple functional domain protein-like [Bombyx mori]	0	100	NA	NA	NA	NA	NA	NA	NA	NA	NA	NA	NA	NA	1.31215	7.87095	1.10161e-17	1.8181e-15	101.47	107.593	113.186	31.939	38.583	32.573	22.918	26.143	22.217	155.454	147.317	154.662	261.395	269.179	282.731	40.631	45.546	40.227	40.954	33.811	35.14	168.362	167.49	165.051
BGIBMGA005960	black	Toxin_hemocyte	gi|512919425|ref|XP_004929377.1| PREDICTED: triple functional domain protein-like [Bombyx mori]	7e-169	99.58	NA	NA	NA	NA	NA	NA	NA	NA	NA	NA	NA	NA	1.31484	6.77263	1.65186e-12	1.54899e-10	46.106	48.211	53.181	18.921	14.365	16.706	10.123	10.287	10.819	60.081	82.533	69.854	123.793	119.957	132.215	22.414	21.265	21.307	15.016	14.497	16.311	82.578	83.419	96.184
BGIBMGA005970	cyan	Toxin_fatbody	no hints			2.31113	2.34506	0.00419016	0.0336175	NA	NA	NA	NA	NA	NA	NA	NA	NA	NA	NA	NA	0.284	0	0	0.155	0	0	1.419	0.797	1.299	267.699	279.273	247.951	0	0.207	0	0	0	0.144	6.314	6.42	5.515	260.216	270.111	286.253
BGIBMGA005980	magenta	Toxin_hemocyte	gi|512918819|ref|XP_004929225.1| PREDICTED: zinc finger protein Xfin-like [Bombyx mori]	0	100	NA	NA	NA	NA	NA	NA	NA	NA	NA	NA	NA	NA	1.63534	6.68501	6.10136e-17	9.32378e-15	41.884	35.927	40.911	24.407	25.803	25.82	25.369	29.314	26.18	43.536	43.033	41.894	130.766	121.811	121.172	25.722	27.256	28.799	40.725	42.005	40.44	46.441	47.211	50.855
BGIBMGA005981	red	Toxin_midgut	gi|379698936|ref|NP_001243939.1| immune-related protein 2 precursor [Bombyx mori] gi|325660635|gb|ADZ40415.1| immune-related protein 2 [Bombyx mori]	6e-102	100	NA	NA	NA	NA	3.97249	2.26718	4.02559e-05	0.00118247	NA	NA	NA	NA	NA	NA	NA	NA	0	0	0	0.217	0	0.167	0.255	0.72	1.412	0.885	0.237	0	0	0	0	0.122	0.483	0.287	3.178	0.938	0.713	10.631	8.195	8.786
BGIBMGA001363	greenyellow	Toxin_cell,Toxin_midgut	gi|112984360|ref|NP_001037207.1| 40S ribosomal protein S21 [Bombyx mori] gi|74837362|sp|Q6PUF8.1|RS21_BOMMO RecName: Full=40S ribosomal protein S21 gi|74844827|sp|Q962Q8.1|RS21_SPOFR RecName: Full=40S ribosomal protein S21 gi|15213830|gb|AAK92190.1|AF400218_1 ribosomal protein S21 [Spodoptera frugiperda] gi|46397623|gb|AAS91554.1| ribosomal protein S21 [Bombyx mori] gi|54609327|gb|AAV34879.1| rib…	1e-51	100	NA	NA	NA	NA	6.4261	7.82388	3.81634e-06	0.000155894	7.49308	9.43203	2.11347e-08	2.28757e-05	NA	NA	NA	NA	0.846	1.355	2.173	4.316	4.249	6.658	18.499	13.371	12.526	8.223	10.274	5.63	4.944	5.033	3.086	2891.58	7.365	8.231	5.429	10.723	7.176	2192.78	2.563	0.293
BGIBMGA006022	cyan	CK_fatbody,CK_midgut	gi|512918630|ref|XP_004929181.1| PREDICTED: la protein homolog isoform X1 [Bombyx mori] gi|512918634|ref|XP_004929182.1| PREDICTED: la protein homolog isoform X2 [Bombyx mori]	0	98.19	-1.20539	6.60753	1.77953e-10	9.21215e-09	-1.00271	5.98902	6.5525e-07	3.26832e-05	NA	NA	NA	NA	NA	NA	NA	NA	60.741	73.89	83.555	186.461	175.7	188.024	147.005	155.134	136.436	142.437	125.442	110.101	94.452	96.441	98.087	198.332	192.554	195.76	66.798	66.972	60.238	64.122	58.232	62.306
BGIBMGA006032	red	Toxin_fatbody	gi|512918574|ref|XP_004929167.1| PREDICTED: adenylate kinase isoenzyme 1-like isoform X1 [Bombyx mori]	2e-162	100	1.58605	3.84716	3.39141e-05	0.000571999	NA	NA	NA	NA	NA	NA	NA	NA	NA	NA	NA	NA	5.295	3.897	4.666	0.665	0.099	0.109	9.18	7.198	5.424	65.083	57.105	60.448	3.057	3.868	4.982	0.183	0.802	0.464	24.062	22.504	22.103	81.048	79.279	88.792
BGIBMGA006056	green	Toxin_hemocyte	gi|512918514|ref|XP_004929153.1| PREDICTED: probable H/ACA ribonucleoprotein complex subunit 1-like [Bombyx mori]	6e-134	100	NA	NA	NA	NA	NA	NA	NA	NA	NA	NA	NA	NA	6.62145	3.50319	6.07419e-06	0.000177238	0	0	0	0	25.066	23.387	0	0	0	0	0	28.83	21.511	21.202	0	29.17	26.887	28.635	0	0	0	19.122	14.971	0
BGIBMGA006065	salmon	CK_midgut	no hints			NA	NA	NA	NA	-6.88846	3.09417	0.000390724	0.00808491	NA	NA	NA	NA	NA	NA	NA	NA	0	0	0	0	0	0	0	0	0.981	63.723	0	0	0	0	0	0	0	0	0	0	0.831	0	0	0
BGIBMGA006085	turquoise	CK_midgut	gi|512918402|ref|XP_004929125.1| PREDICTED: nucleolar protein 58-like isoform X1 [Bombyx mori]	0	100	NA	NA	NA	NA	-1.20909	6.89229	6.10514e-14	1.05197e-11	NA	NA	NA	NA	NA	NA	NA	NA	93.375	103.052	104.568	291.913	286.201	281.896	439.684	452.712	438.643	252.047	256.523	240.27	141.687	136.658	142.914	295.557	283.374	283.018	236.164	241.839	221.976	101.249	103.686	112.28
BGIBMGA001491	pink	CK_fatbody	gi|512920851|ref|XP_004929736.1| PREDICTED: chondroitin proteoglycan 2-like [Bombyx mori]	3e-132	84.42	-1.31871	3.80404	0.00269592	0.0234731	NA	NA	NA	NA	NA	NA	NA	NA	NA	NA	NA	NA	0.601	0.294	0.154	0	0	0.266	17.833	17.918	18.226	9669.5	11838.4	11414.1	0.523	0.041	0	0	0.123	0	6.643	8.36	7.249	10474.1	11390.9	10893.4
BGIBMGA001507	pink	CK_midgut	gi|512920426|ref|XP_004929629.1| PREDICTED: pancreatic triacylglycerol lipase-like [Bombyx mori]	0	96.49	NA	NA	NA	NA	-1.07788	5.84733	8.08895e-08	4.97786e-06	NA	NA	NA	NA	NA	NA	NA	NA	0	0	0	0	0	0.083	0	0.005	0.235	106.964	121.512	114.531	0	0.18	0.185	0	0	0.067	0	0	0	50.516	55.388	54.987
BGIBMGA006127	red	Toxin_fatbody	gi|512918610|ref|XP_004929176.1| PREDICTED: TBC1 domain family member 24-like isoform X1 [Bombyx mori]	1e-41	94.67	1.37621	3.72688	0.000591369	0.00655046	NA	NA	NA	NA	NA	NA	NA	NA	NA	NA	NA	NA	27.424	41.232	34.22	13.107	12.085	14.823	7.851	5.997	7.159	34.681	27.623	33.479	40.524	33.028	31.923	8.251	12.184	9.705	15.795	25.187	20.617	53.333	48.541	39.934
BGIBMGA006136	turquoise	Toxin_hemocyte,Toxin_fatbody	gi|512918674|ref|XP_004929190.1| PREDICTED: tribbles homolog 2-like [Bombyx mori]	3e-136	99.49	1.8699	5.05362	9.11903e-15	7.11625e-13	NA	NA	NA	NA	NA	NA	NA	NA	1.83033	5.5938	1.48091e-15	2.00336e-13	17.1	14.537	16.693	200.848	211.892	208.466	14.591	16.03	17.13	23.525	25.003	25.32	60.008	56.662	60.021	206.49	223.087	221.023	64.703	61.299	57.166	39.585	32.478	40.999
BGIBMGA001528	greenyellow	Toxin_fatbody	gi|512920948|ref|XP_004929761.1| PREDICTED: flocculation protein FLO11-like [Bombyx mori]	0	100	4.529	4.59639	6.93179e-33	1.22857e-30	NA	NA	NA	NA	NA	NA	NA	NA	NA	NA	NA	NA	5.727	4.874	4.887	2.039	1.48	0.667	2.732	1.955	2.078	8.969	4.871	7.281	9.235	8.234	11.792	3.723	0.303	0.296	58.494	52.84	57.951	6.87	6.285	8.339
BGIBMGA006151	salmon	Toxin_fatbody	gi|512919355|ref|XP_004929355.1| PREDICTED: integrin beta-3-like [Bombyx mori]	0	99.72	1.00274	4.50521	0.000516653	0.00583439	NA	NA	NA	NA	NA	NA	NA	NA	NA	NA	NA	NA	35.504	43.398	44.783	83.615	83.124	92.446	14.872	16.1	17.106	0.32	0.327	0.515	66.918	61.631	63.692	74.922	84.037	85.92	36.629	33.521	29.543	0.709	1.491	1.131
BGIBMGA001580	pink	CK_fatbody	gi|512920777|ref|XP_004929717.1| PREDICTED: nuclear cap-binding protein subunit 1-like [Bombyx mori]	0	99.67	-1.06906	4.40468	0.000784809	0.00833172	NA	NA	NA	NA	NA	NA	NA	NA	NA	NA	NA	NA	24.426	22.815	24.665	14.435	15.483	15.361	26.559	31.354	25.249	21.977	21.108	22.982	27.607	24.182	22.874	15.205	15.268	14.929	14.789	14.006	11.605	12.991	16.077	12.291
BGIBMGA006205	red	CK_midgut	no hints			NA	NA	NA	NA	-5.78386	2.30993	0.00377341	0.0494614	NA	NA	NA	NA	NA	NA	NA	NA	0	0	0	0	0	0	0	0.87	0	29.146	0	0	0	0	0	0	0	0	0	0	0	0	0	0
BGIBMGA006207	magenta	CK_fatbody	gi|512919007|ref|XP_004929270.1| PREDICTED: mitochondrial sodium/hydrogen exchanger 9B2-like isoform X1 [Bombyx mori]	0	100	-1.2955	4.28548	0.000160535	0.00218582	NA	NA	NA	NA	NA	NA	NA	NA	NA	NA	NA	NA	73.428	91.095	80.822	42.233	37.97	42.17	24.907	26.037	28.691	167.96	172.619	167.992	71.611	73.449	73.687	40.05	37.099	40.352	11.705	11.295	11.751	168.224	159.045	150.19
BGIBMGA006213	red	CK_midgut	gi|389608119|dbj|BAM17671.1| chitin deacetylase 1 [Papilio xuthus]	0	95.18	NA	NA	NA	NA	-1.04989	6.48486	1.20701e-09	1.03052e-07	NA	NA	NA	NA	NA	NA	NA	NA	0.165	0.127	0.088	0	0	0	263.001	272.351	264.312	185.406	182.106	174.598	0.209	0.296	0.289	0.052	0.19	0.083	155.823	175.715	167.199	82.686	91.217	82.317
BGIBMGA006214	brown	CK_midgut	gi|160333138|ref|NP_001103795.1| very low-density lipoprotein receptor isoform 1 precursor [Bombyx mori] gi|95102594|gb|ABF51235.1| very low-density lipoprotein receptor precursor isoform 1 [Bombyx mori] gi|308228544|gb|ADO24153.1| chitin deacetylase 1 [Bombyx mori]	0	92.53	NA	NA	NA	NA	-1.10807	6.7815	1.08346e-11	1.36906e-09	NA	NA	NA	NA	NA	NA	NA	NA	0	0	0.13	0	0	0	307.237	341.358	327.555	232.472	223.38	221.53	0.11	0.131	0.187	0	0.095	0	200.11	194.69	192.851	102.197	102.117	104.127
BGIBMGA001679	blue	Toxin_midgut	gi|512889095|ref|XP_004922196.1| PREDICTED: gametocyte-specific factor 1-like [Bombyx mori]	6e-63	96.88	NA	NA	NA	NA	4.68622	3.41729	0.00109404	0.0185811	NA	NA	NA	NA	NA	NA	NA	NA	1.513	0	0.699	0.732	0.318	0.405	1.139	0.426	0.877	0	0.969	1.57	0.24	0.297	15.916	1.209	0.672	0.373	1.319	0.344	1.39	0.457	76.639	0
BGIBMGA001754	blue	Toxin_fatbody	gi|512889118|ref|XP_004922200.1| PREDICTED: gelsolin-like [Bombyx mori]	9e-141	98.06	1.62422	4.29168	2.35447e-07	6.82015e-06	NA	NA	NA	NA	NA	NA	NA	NA	NA	NA	NA	NA	197.227	228.625	219.239	1.547	1.553	1.567	9.908	9.516	10.352	137.414	142.125	151.278	261.663	292.058	289.531	1.185	1.696	1.112	33.908	30.762	34.433	204.699	204.596	198.447
BGIBMGA006246	tan	Toxin_fatbody	gi|512903729|ref|XP_004925689.1| PREDICTED: NADP-dependent malic enzyme-like [Bombyx mori]	0	100	1.20532	5.12646	1.24795e-07	3.79355e-06	NA	NA	NA	NA	NA	NA	NA	NA	NA	NA	NA	NA	78.294	83.693	77.737	8.76	9.197	8.465	24.871	23.407	22.328	200.44	223.778	216.532	133.54	145.81	137.498	5.788	7.965	6.473	52.139	59.025	56.615	169.396	169.835	172.018
BGIBMGA001793	blue	Toxin_cell	no hints			NA	NA	NA	NA	NA	NA	NA	NA	5.80475	6.42583	5.8501e-06	0.00297976	NA	NA	NA	NA	1.812	1.471	0.877	0.325	1.166	4.208	2.154	7.304	5.292	49.374	1.952	1.125	0.786	0.688	3.214	5.436	354.447	1.159	2.843	2.55	82.933	2.997	1.826	2.294
BGIBMGA001862	blue	Toxin_fatbody	gi|290560849|ref|NP_001166787.1| cuticular protein glycine-rich 17 precursor [Bombyx mori] gi|223671008|tpd|FAA00455.1| TPA: putative cuticle protein [Bombyx mori]	5e-51	100	4.77133	2.95747	9.45615e-10	4.47434e-08	NA	NA	NA	NA	NA	NA	NA	NA	NA	NA	NA	NA	0.26	1.24	0	0.371	0.44	0.235	0.234	0.669	0.352	0	0.067	0.784	0	1.342	0.513	0.968	0.689	0.558	10.894	17.922	15.271	0	0.395	0
BGIBMGA006280	red	Toxin_fatbody,Toxin_midgut	gi|112984270|ref|NP_001037462.1| cecropin-A precursor [Bombyx mori] gi|512938251|ref|XP_004933962.1| PREDICTED: cecropin-A-like [Bombyx mori] gi|2493573|sp|Q27239.1|CECA_BOMMO RecName: Full=Cecropin-A; Flags: Precursor gi|765344|gb|AAC60515.1| cecropin A [Bombyx mori] gi|1220101|dbj|BAA04217.1| preprocecropin A [Bombyx mori] gi|2970030|dbj|BAA25178.1| cecropin A [Bombyx mori] gi|2970032|dbj|BAA25…	9e-35	100	8.23708	6.81252	5.53896e-107	2.89604e-104	5.25677	3.82027	3.80499e-23	1.97987e-20	NA	NA	NA	NA	NA	NA	NA	NA	0	0	0.774	0	0.058	0	0.559	0	0.783	0.733	2.057	0	0.862	2.78	4.604	0.195	0	0.339	265.864	288.897	276.407	49	37.417	34.782
BGIBMGA006283	purple	CK_hemocyte	no hints			NA	NA	NA	NA	NA	NA	NA	NA	NA	NA	NA	NA	-1.32492	5.78794	1.53319e-10	1.10016e-08	57.595	64.784	57.749	0.08	0.08	0.054	6.49	8.114	7.009	72.767	69.657	66.723	25.188	21.459	25.45	0.123	0.172	0.049	7.608	8.919	8.025	105.482	108.81	115.114
BGIBMGA006308	green	Toxin_hemocyte	gi|512895038|ref|XP_004923576.1| PREDICTED: chaoptin-like [Bombyx mori]	0	95.54	NA	NA	NA	NA	NA	NA	NA	NA	NA	NA	NA	NA	1.49367	5.55782	5.99905e-11	4.62655e-09	21.654	16.514	18.727	0.575	0.605	0.422	6.738	8.085	7.705	12.973	12.522	11.452	53.659	55.543	52.913	0.472	0.432	0.444	11.607	13.015	12.598	16.578	14.926	15.339
BGIBMGA001887	greenyellow	CK_fatbody	gi|512936023|ref|XP_004933417.1| PREDICTED: mitotic spindle assembly checkpoint protein MAD1-like [Bombyx mori]	0	100	-1.01773	5.17303	1.55162e-05	0.000291298	NA	NA	NA	NA	NA	NA	NA	NA	NA	NA	NA	NA	57.001	58.633	58.259	82.566	85.953	85.236	55.567	44.696	47.484	47.685	45.743	45.933	57.589	58.434	57.807	87.746	78.074	85.455	24.756	26.748	24.345	28.217	28.017	34.176
BGIBMGA006345	brown	Toxin_hemocyte	gi|512924794|ref|XP_004930681.1| PREDICTED: protein PF14_0175-like [Bombyx mori]	3e-167	85.67	NA	NA	NA	NA	NA	NA	NA	NA	NA	NA	NA	NA	2.10213	3.20311	0.00152014	0.023187	2.248	1.158	1.93	0.251	0.172	0.122	0.082	0.239	0.125	0	0	0.035	8.6	8.402	9.871	0.337	0.192	0.339	0.555	0.204	0.068	0	0	0.09
BGIBMGA006366	tan	Toxin_fatbody	gi|389615188|dbj|BAM20581.1| unknown unsecreted protein [Papilio polytes]	2e-14	46.67	3.70824	3.69553	6.55425e-14	4.86084e-12	NA	NA	NA	NA	NA	NA	NA	NA	NA	NA	NA	NA	2.614	2.364	3.429	0	0.237	0.179	0.809	1.937	2.169	40.547	37.548	43.537	2.825	1.179	3.083	0.262	0.258	0	28.909	23.285	28.196	26.566	27.444	32.035
BGIBMGA006373	salmon	Toxin_hemocyte,Toxin_midgut	gi|512924438|ref|XP_004930595.1| PREDICTED: RUN and FYVE domain-containing protein 2-like [Bombyx mori]	3e-25	96.23	NA	NA	NA	NA	5.79401	2.30811	0.00252692	0.0360657	NA	NA	NA	NA	6.21705	3.20351	0.00146565	0.0226067	0	0	0	0	0	32.572	0	0	0	0	0	0	0	0	31.369	31.901	0	0	0	0	0	0	27.953	0
BGIBMGA006377	red	CK_fatbody	gi|512924422|ref|XP_004930591.1| PREDICTED: uncharacterized protein LOC101743133 isoform X2 [Bombyx mori] gi|512924426|ref|XP_004930592.1| PREDICTED: uncharacterized protein LOC101743133 isoform X3 [Bombyx mori]	1e-40	100	-3.19112	3.00175	0.00191747	0.0175424	NA	NA	NA	NA	NA	NA	NA	NA	NA	NA	NA	NA	1.135	2.774	0.625	0.529	1.167	0.346	12.661	0	19.061	0.776	3.276	0	1.03	0.332	0.357	1.782	0	0.797	0.948	0	2.29	2.398	1.033	1.596
BGIBMGA006381	green	Toxin_fatbody	gi|158288343|ref|XP_310217.4| AGAP009480-PA [Anopheles gambiae str. PEST] gi|157019205|gb|EAA05936.4| AGAP009480-PA [Anopheles gambiae str. PEST]	3e-35	72.84	4.55135	2.69142	0.00506297	0.039658	NA	NA	NA	NA	NA	NA	NA	NA	NA	NA	NA	NA	0	0	0	0.587	0.054	0.233	0.704	0	0	0	0	0	0.723	0.226	0	1.197	0	0	0	0	39.33	1.679	4.77	0
BGIBMGA006386	turquoise	Toxin_fatbody	gi|569532284|gb|AHE41131.1| abdominal-A transcript variant E [Bombyx mori]	8e-135	100	6.46846	2.7769	0.000877084	0.00918085	NA	NA	NA	NA	NA	NA	NA	NA	NA	NA	NA	NA	0	0	0	0	0	0	0	0	0	0	0	0	0	0	0	0	0	0	0	0	43.469	0	0	0
BGIBMGA001983	blue	CK_fatbody	gi|14028769|gb|AAK52495.1|AF361483_1 chymotrypsin inhibitor CI-8A [Bombyx mori]	0	99.73	-1.80885	4.13855	2.03042e-06	4.78912e-05	NA	NA	NA	NA	NA	NA	NA	NA	NA	NA	NA	NA	0	0	0.09	0	0	0	25.57	27.027	22.992	0	0	0.087	0	0	0	0	0	0.052	6.623	8.477	6.425	0	0	0.213
BGIBMGA006415	red	Toxin_fatbody,Toxin_midgut	gi|112982938|ref|NP_001037099.1| chorion b-ZIP transcription factor [Bombyx mori] gi|54401523|gb|AAV34566.1| chorion b-ZIP transcription factor [Bombyx mori]	0	100	1.99413	8.26852	1.20317e-38	2.67693e-36	1.0188	8.6106	6.17712e-16	1.27262e-13	NA	NA	NA	NA	NA	NA	NA	NA	279.559	295.966	294.445	393.08	418.082	422.141	125.065	155.089	146.19	399.646	406.622	393.069	402.83	383.538	387.825	401.597	413.58	426.63	580.912	589.907	585.962	803.055	796.759	797.925
BGIBMGA006510	turquoise	Toxin_fatbody	gi|512924481|ref|XP_004930606.1| PREDICTED: myosin light chain alkali-like isoform X1 [Bombyx mori]	4e-119	100	3.19677	9.80268	8.51047e-109	4.68389e-106	NA	NA	NA	NA	NA	NA	NA	NA	NA	NA	NA	NA	0	0.844	0.6	0	0.121	0	206.964	190.059	204.67	3067.28	3333.54	3327.55	0.376	0	0.709	0.133	0	0	1845.04	1990.8	1873.29	4332.02	4739.63	4455.93
BGIBMGA006512	turquoise	Toxin_midgut	gi|512924493|ref|XP_004930609.1| PREDICTED: U1 small nuclear ribonucleoprotein A-like [Bombyx mori]	5e-73	100	NA	NA	NA	NA	5.17575	7.93697	2.12599e-10	2.16645e-08	NA	NA	NA	NA	NA	NA	NA	NA	0.374	0.299	0.718	0	0.127	0	0.568	0	0.948	20.372	23.824	16.253	1.655	2.134	2.04	0	0	0	5.532	3.776	3.489	1026.51	1158.37	38.618
BGIBMGA002002	greenyellow	Toxin_fatbody	gi|512933657|ref|XP_004932845.1| PREDICTED: calcium-binding mitochondrial carrier protein SCaMC-2-like isoform X2 [Bombyx mori]	0	100	1.32572	4.86485	1.46542e-07	4.34106e-06	NA	NA	NA	NA	NA	NA	NA	NA	NA	NA	NA	NA	13.955	20.35	19.061	16.424	15.559	14.222	18.236	17.915	19.921	33.576	33.957	33.043	22.271	23.786	22.316	17.046	19.466	16.344	47.924	51.785	42.538	48.47	42.572	42.879
BGIBMGA006529	magenta	CK_hemocyte	gi|512924528|ref|XP_004930617.1| PREDICTED: facilitated trehalose transporter Tret1-1-like [Bombyx mori]	0	52.88	NA	NA	NA	NA	NA	NA	NA	NA	NA	NA	NA	NA	-1.59044	3.77121	0.000919415	0.0149351	9.378	16.151	12.856	0.4	0.098	0.421	5.199	5.575	4.983	0.566	1.451	5.17	4.534	7.369	1.766	0.615	1.069	0.971	10.736	11.045	14.186	3.502	0.315	0.83
BGIBMGA006543	magenta	CK_hemocyte	no hints			NA	NA	NA	NA	NA	NA	NA	NA	NA	NA	NA	NA	-6.76914	3.48515	0.000377502	0.00675737	47.772	0	0	0	0	0	46.819	48.06	0	0	5.985	0	0	0	0	0	0	0	0	85.521	83.107	7.288	0	0
BGIBMGA006554	magenta	Toxin_midgut	gi|512924154|ref|XP_004930529.1| PREDICTED: LOW QUALITY PROTEIN: Ca(2+)/calmodulin-responsive adenylate cyclase-like [Bombyx mori]	3e-53	100	NA	NA	NA	NA	1.4202	3.85422	3.3086e-05	0.00100822	NA	NA	NA	NA	NA	NA	NA	NA	19.547	17.364	14.737	37.864	32.633	32.999	6.158	11.48	13.362	10.484	7.035	15.095	24.728	0.314	48.171	34.179	15.509	35.537	9.164	0	10.17	27.621	29.09	29.432
BGIBMGA006575	green	CK_fatbody	gi|512923788|ref|XP_004930437.1| PREDICTED: multiple inositol polyphosphate phosphatase 1-like [Bombyx mori]	5e-109	98.72	-1.07546	3.95058	0.00495063	0.0390413	NA	NA	NA	NA	NA	NA	NA	NA	NA	NA	NA	NA	21.926	23.766	24.856	56.027	57.223	60.994	18.572	19.048	20.25	18.8	16.58	21.908	20.552	17.346	20.677	62.502	59.385	54.495	8.027	12.594	7.303	14.133	15.519	18.304
BGIBMGA006620	salmon	CK_cell	gi|512923566|ref|XP_004930383.1| PREDICTED: ankyrin repeat and MYND domain-containing protein 2-like [Bombyx mori]	0	100	NA	NA	NA	NA	NA	NA	NA	NA	-4.62405	5.40728	4.9665e-28	1.07512e-24	NA	NA	NA	NA	1.6	8.528	3.712	74.585	44.134	39.109	8.622	9.691	11.533	4.461	0.608	10.357	1.867	4.424	3.789	3.602	1.246	1.311	3.993	2.198	5.063	0.26	2.293	2.221
BGIBMGA006632	cyan	CK_midgut	gi|512924038|ref|XP_004930500.1| PREDICTED: THO complex subunit 6-like [Bombyx mori]	0	89.83	NA	NA	NA	NA	-1.07899	4.60251	2.51309e-05	0.000799213	NA	NA	NA	NA	NA	NA	NA	NA	31.248	33.136	32.462	125.982	132.883	133.366	82.317	89.485	85.028	51.32	47.731	40.544	23.485	20.182	20.736	134.533	132.101	125.584	45.296	44.358	42.225	23.277	21.365	19.097
BGIBMGA006634	yellow	CK_fatbody,CK_midgut	gi|389609987|dbj|BAM18605.1| unknown unsecreted protein [Papilio xuthus]	2e-65	58.19	-1.37254	6.37674	3.79831e-11	2.10153e-09	-1.14203	5.03379	2.3245e-07	1.32706e-05	NA	NA	NA	NA	NA	NA	NA	NA	24.863	21.495	28.114	34.592	33.885	33.384	114.033	145.761	121.288	63.538	67.201	61.771	24.106	25.569	24.556	34.808	37.226	38.375	51.615	51.763	48.1	25.919	28.964	29.819
BGIBMGA006636	magenta	Toxin_hemocyte	gi|357625592|gb|EHJ75991.1| hect type E3 ubiquitin ligase [Danaus plexippus]	0	68.26	NA	NA	NA	NA	NA	NA	NA	NA	NA	NA	NA	NA	2.8032	6.66141	2.92552e-37	2.01178e-34	23.161	17.39	20.079	9.759	9.47	9.049	5.692	6.16	6.78	3.96	3.212	3.868	146.361	142.001	138.177	10.882	11.865	14.067	7.401	6.262	8.74	6.623	5.217	5.279
BGIBMGA006637	yellow	Toxin_hemocyte	gi|357625594|gb|EHJ75993.1| putative E3 ubiquitin-protein ligase HECW2 [Danaus plexippus]	0	91.29	NA	NA	NA	NA	NA	NA	NA	NA	NA	NA	NA	NA	2.7629	5.2257	1.48401e-21	3.06152e-19	7.468	7.339	6.098	8.668	7.498	9.38	6.807	8.316	6.909	10.097	5.641	5.384	44.225	57.603	47.88	10.073	8.902	9.733	7.761	7.31	7.66	6.513	5.648	5.755
BGIBMGA006642	yellow	Toxin_fatbody	gi|512924018|ref|XP_004930495.1| PREDICTED: solute carrier family 2, facilitated glucose transporter member 5-like [Bombyx mori]	0	86.23	1.09419	8.94772	1.17002e-16	1.0924e-14	NA	NA	NA	NA	NA	NA	NA	NA	NA	NA	NA	NA	26.705	27.551	25.189	12.13	12.516	11.693	379.161	331.526	364.968	26.182	30.689	32.511	29.448	31.358	26.714	12.438	13.11	11.854	789.788	782.65	798.811	20.511	18.56	14.935
BGIBMGA002309	blue	CK_midgut	gi|114052609|ref|NP_001040261.1| nucleoplasmin isoform 2 [Bombyx mori] gi|87248551|gb|ABD36328.1| nucleoplasmin isoform 2 [Bombyx mori]	9e-132	100	NA	NA	NA	NA	-1.06623	9.33829	3.10958e-18	8.93016e-16	NA	NA	NA	NA	NA	NA	NA	NA	682.09	953.183	930.725	2930.42	3125.87	3080.14	1722.07	1831.47	1830.52	1370.35	1325.82	1346.05	1058.77	939.075	1003.6	3022.79	3063.74	3174.41	964.551	947.135	961.678	605.146	649.251	645.414
BGIBMGA006678	turquoise	CK_fatbody	gi|512923373|ref|XP_004930338.1| PREDICTED: LOW QUALITY PROTEIN: protein tiptop-like [Bombyx mori]	0	99.77	-1.90919	2.82609	0.00663128	0.0494956	NA	NA	NA	NA	NA	NA	NA	NA	NA	NA	NA	NA	0.41	0.576	0.888	0.076	0.23	0.094	9.683	5.852	8.346	0.023	0	0.026	1.017	0.973	0.932	0.118	0.581	0.228	6.109	0.056	0	2.685	1.645	0.033
BGIBMGA006689	brown	CK_midgut	gi|512924002|ref|XP_004930491.1| PREDICTED: peroxisomal acyl-coenzyme A oxidase 3-like [Bombyx mori]	0	92.05	NA	NA	NA	NA	-1.58124	6.24421	8.18517e-17	1.989e-14	NA	NA	NA	NA	NA	NA	NA	NA	40.096	40.749	38.254	29.225	27.8	31.387	39.091	34.013	35.757	157.573	171.842	172.351	76.457	72.428	73.752	25.587	29.237	26.908	32.169	33.329	28.93	51.232	55.584	56.145
BGIBMGA006696	magenta	Toxin_hemocyte	no hints			NA	NA	NA	NA	NA	NA	NA	NA	NA	NA	NA	NA	1.38152	4.1663	0.000624748	0.0108307	8.128	6.128	6.343	11.901	11.704	10.816	0.648	1.078	1.535	0.347	0	0.28	19.909	16.808	17.525	10.699	14.157	11.458	1.081	1.17	0.591	0	0.322	0
BGIBMGA002548	blue	Toxin_fatbody	gi|112983982|ref|NP_001036835.1| cuticular protein RR-1 motif 4 precursor [Bombyx mori] gi|5360249|dbj|BAA81902.1| cuticle protein LCP18 [Bombyx mori] gi|223671109|tpd|FAA00506.1| TPA: putative cuticle protein [Bombyx mori]	4e-68	100	1.00011	9.42282	3.47824e-11	1.94502e-09	NA	NA	NA	NA	NA	NA	NA	NA	NA	NA	NA	NA	0	0.532	0	0	0	0	467.491	513.452	577.052	294.336	288.978	315.359	0.077	0.924	0.122	0	0.83	0	1101.67	956.201	1167.35	156.342	219.86	210.128
BGIBMGA002660	pink	Toxin_fatbody	gi|512931571|ref|XP_004932336.1| PREDICTED: myrosinase 1-like [Bombyx mori]	0	100	1.75064	5.42003	5.78608e-16	5.04208e-14	NA	NA	NA	NA	NA	NA	NA	NA	NA	NA	NA	NA	4.775	3.467	3.658	0.251	0	0	24.942	20.75	21.249	177.084	186.073	180.437	5.337	5.664	6.995	0	0.297	0.086	74.507	83.678	75.181	202.045	209.193	201.425
BGIBMGA006772	brown	CK_fatbody,CK_midgut	gi|512923828|ref|XP_004930447.1| PREDICTED: putative ribosomal RNA methyltransferase NOP2-like [Bombyx mori]	0	100	-1.13541	6.46741	3.17386e-09	1.36021e-07	-1.04212	5.71296	6.11128e-07	3.08067e-05	NA	NA	NA	NA	NA	NA	NA	NA	43.257	52.382	49.744	137.694	132.553	130.788	126.7	131.32	132.16	111.491	104.255	96.052	65.411	71.913	68.4	147.745	141.839	139.208	64.112	60.102	59.882	47.897	47.557	52.066
BGIBMGA006779	yellow	CK_fatbody	gi|512923848|ref|XP_004930452.1| PREDICTED: probable protein phosphatase CG10417-like [Bombyx mori]	0	100	-1.25356	6.70875	8.21694e-12	5.11456e-10	NA	NA	NA	NA	NA	NA	NA	NA	NA	NA	NA	NA	58.021	77.226	79.81	208.546	217.385	216.159	154.827	162.672	157.644	128.248	114.975	121.514	76.735	88.477	85.649	225.067	214.566	220.924	67.863	69.119	68.827	69.532	69.361	69.738
BGIBMGA002664	pink	Toxin_fatbody	gi|223671103|tpd|FAA00503.1| TPA: putative cuticle protein [Bombyx mori]	7e-140	100	3.77809	4.71815	3.18623e-30	4.89976e-28	NA	NA	NA	NA	NA	NA	NA	NA	NA	NA	NA	NA	969.091	1208.12	1142.25	0.96	0.697	0.858	4.449	2.701	5.236	3.998	2.457	1.342	1822.49	1659.25	1810.26	0.949	1.139	0	58.563	62.002	56.769	1.739	2.297	1.493
BGIBMGA006785	magenta	CK_midgut	gi|512923906|ref|XP_004930467.1| PREDICTED: cytochrome P450 6j1 [Bombyx mori]	0	100	NA	NA	NA	NA	-2.79715	3.00054	4.30935e-06	0.000175278	NA	NA	NA	NA	NA	NA	NA	NA	6.96	0.13	3.023	0.962	0.684	1.101	1.57	3.612	0.088	13.031	20.728	13.142	0	3.019	2.108	1.757	0.741	1.501	3.946	2.094	1.915	4.39	1.634	1.588
BGIBMGA006795	black	CK_hemocyte	gi|112982657|ref|NP_001037640.1| polymerase delta interacting protein 3 [Bombyx mori] gi|109706825|gb|ABG42999.1| polymerase delta interacting protein 3 [Bombyx mori]	8e-45	100	NA	NA	NA	NA	NA	NA	NA	NA	NA	NA	NA	NA	-3.11316	3.81232	0.00298987	0.040183	48.754	2.127	3.999	2.656	72.333	0.812	3.062	5.689	2.591	46.614	0.288	3.286	0.549	3.483	2.388	2.898	70.684	0.582	36.901	5.64	1.199	51.021	1.385	3.619
BGIBMGA006813	brown	CK_fatbody	gi|512900447|ref|XP_004924894.1| PREDICTED: nuclear pore complex protein Nup155-like, partial [Bombyx mori]	0	92.19	-1.16446	6.19968	1.02557e-08	3.89978e-07	NA	NA	NA	NA	NA	NA	NA	NA	NA	NA	NA	NA	59.693	61.933	62.404	98.207	100.736	98.746	108.398	105.568	109.27	55.897	60.325	56.736	62.648	61.228	63.146	95.904	98.343	92.992	50.875	50.613	46.888	35.274	34.027	37.555
BGIBMGA006846	grey	CK_fatbody	gi|108878779|gb|EAT43004.1| AAEL005529-PA [Aedes aegypti]	1e-125	62.21	-2.05971	6.59895	3.13173e-23	3.80796e-21	NA	NA	NA	NA	NA	NA	NA	NA	NA	NA	NA	NA	0.029	0.045	0.041	0.39	0.328	0.435	154.802	180.95	158.663	0.924	0.901	0.894	0.138	0.13	0.153	0.29	5.107	0.373	43.319	39.843	39.529	0.895	1.09	1.328
BGIBMGA006870	brown	CK_hemocyte	gi|108874421|gb|EAT38646.1| AAEL009477-PB [Aedes aegypti]	5e-82	31.4	NA	NA	NA	NA	NA	NA	NA	NA	NA	NA	NA	NA	-1.1031	4.68167	0.000311701	0.00591301	22.916	25.384	26.618	12.328	13.315	17.147	2.193	2.234	1.991	279.398	272.948	255.797	12.56	10.392	12.273	14.472	15.518	15.567	1.812	2.365	1.979	170.788	160.097	187.164
BGIBMGA006877	magenta	Toxin_midgut	gi|512900347|ref|XP_004924869.1| PREDICTED: sorting nexin-29-like [Bombyx mori]	0	99.55	NA	NA	NA	NA	1.13338	4.75718	2.13126e-06	9.1809e-05	NA	NA	NA	NA	NA	NA	NA	NA	52.486	62.998	61.905	46.495	46.644	52.424	11.935	12.186	13.228	29.793	21.382	23.543	60.918	61.446	60.596	49.23	47.675	46.311	18.146	19.996	19.358	58.764	49.461	54.698
BGIBMGA002721	blue	CK_fatbody	gi|112983202|ref|NP_001037019.1| putative deoxynucleoside kinase [Bombyx mori] gi|13506751|gb|AAK28318.1|AF226281_1 putative deoxynucleoside kinase [Bombyx mori]	0	99.6	-1.18294	4.9748	4.25608e-06	9.29141e-05	NA	NA	NA	NA	NA	NA	NA	NA	NA	NA	NA	NA	41.26	44.303	46.116	164.357	173.161	168.231	41.994	43.295	45.692	9.723	15.707	13.833	44.271	38.591	42.966	154.673	150.836	150.425	17.478	23.569	18.33	9.289	9.746	12.045
BGIBMGA006916	turquoise	CK_fatbody,CK_midgut	gi|134254470|ref|NP_001077078.1| cytochrome P450 18a1 [Bombyx mori] gi|126238306|gb|ABO07438.1| cytochrome P450 [Bombyx mori] gi|433339094|dbj|BAM73898.1| cytochrome P450 [Bombyx mori] gi|433339096|dbj|BAM73899.1| cytochrome P450 [Bombyx mori] gi|433339098|dbj|BAM73900.1| cytochrome P450 [Bombyx mori]	0	100	-1.25999	5.52359	5.5798e-09	2.23555e-07	-1.72986	3.67585	9.29879e-06	0.000341568	NA	NA	NA	NA	NA	NA	NA	NA	1.383	0.649	0.814	4.395	5.433	3.499	72.175	63.071	65.785	30.18	23.777	21.081	0.813	0.623	0.581	4.178	5.56	5.055	27.509	28.289	31.499	8.7	5.883	7.266
BGIBMGA002760	blue	CK_fatbody	gi|512910665|ref|XP_004927226.1| PREDICTED: ubiquitin carboxyl-terminal hydrolase 14-like [Bombyx mori]	2e-67	100	-1.61425	3.91174	5.17568e-05	0.000825032	NA	NA	NA	NA	NA	NA	NA	NA	NA	NA	NA	NA	19.849	15.135	40.565	20.511	21.423	18.886	13.62	21.7	26.185	26.082	17.742	8.516	14.729	47.121	13.119	16.543	11.809	14.527	7.071	7.617	5.556	10.503	4.973	15.242
BGIBMGA006937	yellow	Toxin_fatbody	gi|357625725|gb|EHJ76074.1| troponin C [Danaus plexippus]	4e-87	93.71	3.91959	8.43823	6.33357e-104	3.15381e-101	NA	NA	NA	NA	NA	NA	NA	NA	NA	NA	NA	NA	0.298	0.228	0.348	9.34	6.65	6.723	56.819	46.226	47.338	818.876	941.753	782.453	0.514	1.023	0.878	7.023	8.683	6.642	765.313	833.28	739.474	1155.62	1117.63	1175.84
BGIBMGA002807	blue	CK_fatbody	gi|512885503|ref|XP_004921606.1| PREDICTED: dual specificity protein phosphatase 19-like [Bombyx mori]	7e-130	100	-2.18393	3.22167	0.000314983	0.00384338	NA	NA	NA	NA	NA	NA	NA	NA	NA	NA	NA	NA	18.24	18.807	17.779	0	0	0	14.463	9.027	12.636	12.421	16.982	15.886	16.371	13.086	16.375	0	0	20.494	0	0	8.431	15.451	14.76	16.7
BGIBMGA002943	greenyellow	Toxin_fatbody	gi|512885771|ref|XP_004921651.1| PREDICTED: 15-hydroxyprostaglandin dehydrogenase [NAD(+)]-like [Bombyx mori]	1e-125	73.33	1.14043	3.76595	0.00448313	0.0357046	NA	NA	NA	NA	NA	NA	NA	NA	NA	NA	NA	NA	0	0	0	0	0	0	7.529	10.791	6.755	1.817	1.964	2.033	0	0.208	0	0	0	0	18.463	18.731	21.442	3.07	2.14	2.023
BGIBMGA006976	black	CK_hemocyte	gi|112983960|ref|NP_001036843.1| BAG domain-containing protein Samui [Bombyx mori] gi|27151475|sp|Q9BLJ6.1|BAGS_BOMMO RecName: Full=BAG domain-containing protein Samui	0	97.82	NA	NA	NA	NA	NA	NA	NA	NA	NA	NA	NA	NA	-1.944	7.07354	0.00187218	0.0273004	180.342	155.103	171.419	49.221	42.52	41.674	60.77	62.171	68.152	11.737	110.704	103.462	24.613	3.664	105.131	44.973	48.09	48.835	122.577	110.063	112.022	147.85	4.072	141.898
BGIBMGA006991	red	Toxin_hemocyte	gi|357613234|gb|EHJ68391.1| ryanodine receptor-like protein [Danaus plexippus]	7e-30	63.92	NA	NA	NA	NA	NA	NA	NA	NA	NA	NA	NA	NA	2.56248	6.13362	4.38601e-31	1.90491e-28	16.366	17.945	13.738	1.262	0.214	0	59.88	47.039	46.907	29.461	35.469	32.572	82.706	100.771	102.441	0.893	1.267	0.202	52.718	50.227	49.176	25.698	23.3	26.578
BGIBMGA006999	grey	CK_fatbody	gi|512932701|ref|XP_004932611.1| PREDICTED: small subunit processome component 20 homolog [Bombyx mori]	0	95.36	-1.22959	5.92241	5.50756e-09	2.22365e-07	NA	NA	NA	NA	NA	NA	NA	NA	NA	NA	NA	NA	29.591	26.507	29.363	78.039	79.591	79.412	86.456	91.509	89.172	44.443	44.625	43.649	30.149	31.23	30.203	84.46	82.05	82	39.852	38.472	38.314	22.96	22.482	26.235
BGIBMGA007032	magenta	Toxin_hemocyte,Toxin_fatbody	gi|357626410|gb|EHJ76511.1| putative Cytohesin-1 [Danaus plexippus]	3e-21	97.83	1.13334	4.35502	0.000223913	0.00290504	NA	NA	NA	NA	NA	NA	NA	NA	1.42741	6.0074	2.95454e-12	2.70899e-10	23.61	28.277	28.641	51.15	36.836	72.527	12.164	16.749	11.784	8.966	8.549	6.012	69.341	68.686	85.486	42.325	39.104	41.771	30.381	31.382	31.253	17.702	14.148	11.158
BGIBMGA007067	grey	CK_fatbody	gi|242010303|ref|XP_002425908.1| beat protein, putative [Pediculus humanus corporis] gi|212509884|gb|EEB13170.1| beat protein, putative [Pediculus humanus corporis]	1e-33	37.42	-1.10505	6.55596	2.14269e-08	7.56964e-07	NA	NA	NA	NA	NA	NA	NA	NA	NA	NA	NA	NA	0	0	0	0	0.433	0	149.241	126.915	137.334	5.212	3.457	5.984	0	0	0	0	0	0	54.644	75.627	70.993	5.09	5.226	5.873
BGIBMGA007082	red	CK_fatbody	gi|114052735|ref|NP_001040494.1| U2 small nuclear ribonucleoprotein auxiliary factor 2 [Bombyx mori] gi|95103122|gb|ABF51502.1| U2 small nuclear ribonucleoprotein auxiliary factor 2 isoform 1 [Bombyx mori]	0	100	-1.04191	7.19425	4.80563e-10	2.34825e-08	NA	NA	NA	NA	NA	NA	NA	NA	NA	NA	NA	NA	120.349	128.194	116.641	324.83	334.621	345.361	217.993	220.349	206.84	174.54	170.85	175.032	152.16	133.4	149.308	325.76	329.328	319.858	102.124	114.329	106.609	92.121	92.196	87.422
BGIBMGA007093	turquoise	Toxin_midgut	gi|512932383|ref|XP_004932532.1| PREDICTED: solute carrier family 25 member 38-like isoform X1 [Bombyx mori]	0	100	NA	NA	NA	NA	1.68897	6.04443	3.46536e-18	9.65918e-16	NA	NA	NA	NA	NA	NA	NA	NA	24.1	28.863	25.682	45.919	56.356	55.6	70.696	67.254	64.032	51.587	44.003	48.587	25.229	31.618	26.187	59.351	51.771	50.732	108.108	114.624	108.165	152.763	153.302	155.076
BGIBMGA007106	purple	CK_cell	no hints			NA	NA	NA	NA	NA	NA	NA	NA	-7.60483	3.97136	2.26522e-05	0.00891572	NA	NA	NA	NA	0	0	0	54.687	0	0	0	0	0	0	0	0	0	0	0	0	0	0	0	0	0	0	0	0
BGIBMGA003070	pink	Toxin_midgut	gi|512925590|ref|XP_004930876.1| PREDICTED: mitochondrial import inner membrane translocase subunit Tim13-like [Bombyx mori]	3e-59	100	NA	NA	NA	NA	7.73422	3.81807	3.921e-05	0.00116853	NA	NA	NA	NA	NA	NA	NA	NA	0	0	0	0	0	0	0	0	0	0	0	0	0	0	0	0	0	0	0	0	0	0	110.744	0
BGIBMGA007159	turquoise	CK_cell	gi|512901143|ref|XP_004925063.1| PREDICTED: probable isocitrate dehydrogenase [NAD] subunit alpha, mitochondrial-like [Bombyx mori]	1e-77	100	NA	NA	NA	NA	NA	NA	NA	NA	-5.31482	6.04827	2.03125e-07	0.000159896	NA	NA	NA	NA	77.989	1.811	98.697	1.755	178.919	75.167	4.401	3.263	61.444	292.487	304.713	310.803	2.027	40.961	2.866	2.508	1.951	2.109	58.471	3.348	0.918	143.325	132.539	349.889
BGIBMGA007162	turquoise	CK_fatbody	gi|512901131|ref|XP_004925060.1| PREDICTED: nucleolar protein 6-like [Bombyx mori]	0	100	-1.10256	5.41307	5.01989e-07	1.34598e-05	NA	NA	NA	NA	NA	NA	NA	NA	NA	NA	NA	NA	25.645	24.249	21.951	40.569	36.45	37.786	59.677	60.185	59.625	23.35	25.28	23.671	23.905	25.862	26.098	40.552	40.387	37.534	29.066	29.107	27.775	14.57	13.241	13.543
BGIBMGA007190	turquoise	Toxin_fatbody	gi|512901087|ref|XP_004925049.1| PREDICTED: D-amino-acid oxidase 2-like [Bombyx mori]	0	100	1.52918	5.04837	7.60884e-11	4.05947e-09	NA	NA	NA	NA	NA	NA	NA	NA	NA	NA	NA	NA	0.419	0.22	0.263	0.457	1.339	1.507	20.521	19.626	17.07	0.34	0.192	0.372	0	0.339	1.103	0.274	0.363	0.467	58.534	58.405	53.355	0.843	0.915	0.703
BGIBMGA003323	blue	CK_fatbody	gi|375151601|ref|NP_001243511.1| putative membrane protein precursor [Bombyx mori] gi|221148494|gb|ACL99854.1| putative membrane protein [Bombyx mori]	4e-160	100	-2.01775	3.99576	1.69596e-06	4.10447e-05	NA	NA	NA	NA	NA	NA	NA	NA	NA	NA	NA	NA	0	0	0	0	0	0	24.061	21.665	22.363	12736.9	13087.4	12839.9	0.339	0.349	0	0	0	0	4.306	8.127	5.37	15556.3	16023.4	15727.7
BGIBMGA007240	black	Toxin_fatbody	gi|512909982|ref|XP_004927055.1| PREDICTED: glycine receptor subunit alpha-1-like [Bombyx mori]	0	88.91	1.11353	3.89965	0.00221083	0.0198103	NA	NA	NA	NA	NA	NA	NA	NA	NA	NA	NA	NA	0.372	0.669	0.778	2.375	3.159	3.169	9.954	8.927	9.622	7.813	7.366	7.812	1.476	1.228	0.609	2.343	2.453	1.911	21.991	20.616	22.481	5.138	5.085	5.271
BGIBMGA007254	yellow	CK_hemocyte,Toxin_fatbody	gi|379046450|gb|AFC87786.1| yellow-d [Bombyx mori]	0	100	1.28986	5.63048	8.95117e-08	2.80247e-06	NA	NA	NA	NA	NA	NA	NA	NA	-1.00798	6.00994	1.50971e-07	6.1674e-06	62.91	69.671	65.262	0.154	0.104	0.203	24.295	32.581	39.895	5.529	8.259	4.674	31.922	34.695	33.753	0	0	0.094	69.053	71.824	109.214	7.665	14.89	10.463
BGIBMGA003530	greenyellow	Toxin_fatbody	gi|512922330|ref|XP_004930094.1| PREDICTED: proline-rich receptor-like protein kinase PERK8-like isoform X1 [Bombyx mori]	0	100	2.16444	3.14944	7.02451e-05	0.00108182	NA	NA	NA	NA	NA	NA	NA	NA	NA	NA	NA	NA	1.753	1.718	2.013	0	0.124	0	3.737	2.192	3.341	0.669	0.845	0.733	0.939	0.813	0.549	0	0	0.143	17.196	13.655	10.65	0.384	0.628	0
BGIBMGA003546	pink	Toxin_fatbody,Toxin_midgut	gi|512922199|ref|XP_004930062.1| PREDICTED: alkaline ceramidase-like isoform X1 [Bombyx mori]	1e-153	82.9	1.76089	5.42816	1.99725e-16	1.8161e-14	1.5091	3.28901	0.000627363	0.0120844	NA	NA	NA	NA	NA	NA	NA	NA	13.353	11.069	11.135	27.02	23.653	27.805	20.032	22.193	24.607	4.636	8.271	7.015	11.874	11.536	11.887	33.088	31.437	31.384	75.333	77.14	83.996	15.417	17.593	22.135
BGIBMGA007278	black	Toxin_fatbody	gi|512905068|ref|XP_004925853.1| PREDICTED: putative inorganic phosphate cotransporter-like [Bombyx mori]	0	98.13	2.56915	4.86374	1.01811e-20	1.14477e-18	NA	NA	NA	NA	NA	NA	NA	NA	NA	NA	NA	NA	0.186	1.07	0.398	0.101	0.255	0.08	7.933	9.636	10.473	731.555	716.494	705.555	2.326	2.847	3.261	0.173	0	0.047	59.174	59.377	59.259	674.494	677.646	684.198
BGIBMGA007279	black	Toxin_fatbody,Toxin_midgut	gi|512905259|ref|XP_004925899.1| PREDICTED: putative inorganic phosphate cotransporter-like [Bombyx mori]	4e-80	100	2.92006	2.34572	0.000520361	0.0058636	6.09384	4.62364	9.51348e-11	1.04836e-08	NA	NA	NA	NA	NA	NA	NA	NA	0	0	0	0.188	0	0	2.706	0.061	0	0.347	1.779	1.239	0	0	0	0	0	0	8.928	6.24	4.849	1.741	101.041	105.855
BGIBMGA007280	tan	Toxin_fatbody	gi|512905259|ref|XP_004925899.1| PREDICTED: putative inorganic phosphate cotransporter-like [Bombyx mori]	0	100	5.6968	2.40081	7.66774e-06	0.000155692	NA	NA	NA	NA	NA	NA	NA	NA	NA	NA	NA	NA	0	0	0	0.083	0	0.057	0.362	0.453	0.083	136.984	163.797	150.021	0	0	0	0	0	0.153	7.761	9.907	7.345	140.733	169.42	142.206
BGIBMGA007292	magenta	Toxin_midgut	gi|512905283|ref|XP_004925905.1| PREDICTED: 72 kDa inositol polyphosphate 5-phosphatase-like [Bombyx mori]	6e-52	83.96	NA	NA	NA	NA	2.07264	2.63163	0.000916916	0.0160919	NA	NA	NA	NA	NA	NA	NA	NA	8.761	5.891	7.489	9.451	7.595	10.35	0.803	2.126	2.067	0.373	0.234	7.049	5.91	0	4.155	4.124	3.72	9.238	1.557	0.888	1.027	9.74	13.84	10.197
BGIBMGA007310	black	Toxin_midgut	gi|379698898|ref|NP_001243920.1| DRK protein [Bombyx mori] gi|326632041|gb|ADZ99023.1| DRK [Bombyx mori]	2e-43	100	NA	NA	NA	NA	5.15658	3.72	2.64814e-07	1.49384e-05	NA	NA	NA	NA	NA	NA	NA	NA	1.622	3.188	2.459	1.623	0.116	1.622	1.635	0.499	1.921	1.446	0.441	1.52	1.634	60.043	2.001	1.356	0.711	1.023	2.926	2.5	3.821	54.101	55.994	0.976
BGIBMGA007319	green	Toxin_fatbody	gi|512912184|ref|XP_004927594.1| PREDICTED: mitochondrial uncoupling protein 4-like isoform X1 [Bombyx mori]	0	100	1.23728	5.59987	2.2625e-09	9.89917e-08	NA	NA	NA	NA	NA	NA	NA	NA	NA	NA	NA	NA	4.327	4.292	5.968	12.645	12.353	13.992	33.752	26.466	38.068	33.776	37.468	37.61	4.194	5.962	3.275	12.728	11.872	10.905	79.074	80.634	77.484	50.814	51.822	59.864
BGIBMGA007324	black	Toxin_fatbody,Toxin_midgut	gi|512911603|ref|XP_004927453.1| PREDICTED: homogentisate 1,2-dioxygenase-like [Bombyx mori]	0	100	1.41039	3.68364	0.000465508	0.00536103	1.06781	6.20676	8.77806e-09	6.60236e-07	NA	NA	NA	NA	NA	NA	NA	NA	0.375	0.131	0.158	0.673	0.842	0.498	6.878	5.93	8.22	79.067	63.121	78.497	0.228	0.686	0	1.022	0.685	0.687	18.482	22.273	16.089	146.631	150.325	155.781
BGIBMGA007326	black	Toxin_fatbody	no hints			1.08979	4.55405	0.000148079	0.00204784	NA	NA	NA	NA	NA	NA	NA	NA	NA	NA	NA	NA	33.858	45.169	45.732	14.252	15.475	18.942	14.5	14.137	19.261	8.759	7.759	10.176	54.393	50.231	50.084	12.053	16.067	14.993	36.12	40.235	29.303	7.402	7.589	13.675
BGIBMGA007338	turquoise	Toxin_fatbody	gi|512896816|ref|XP_004924001.1| PREDICTED: aquaporin-12A-like [Bombyx mori]	1e-90	99.25	1.71398	3.72818	1.9509e-05	0.000357278	NA	NA	NA	NA	NA	NA	NA	NA	NA	NA	NA	NA	0	0	0	0.353	0	0	5.002	3.008	9.486	43.001	44.785	48.78	0	0	0	0	0.374	0.324	20.895	22.999	19.848	50.109	52.99	48.491
BGIBMGA007339	yellow	Toxin_fatbody	gi|512896816|ref|XP_004924001.1| PREDICTED: aquaporin-12A-like [Bombyx mori]	9e-46	92.59	1.92265	3.35094	4.24282e-05	0.000688931	NA	NA	NA	NA	NA	NA	NA	NA	NA	NA	NA	NA	0	0	0	0	0	0	2.231	4.339	5.154	32.236	35.019	35.122	0	0	0	0	0	0	17.755	15.557	14.34	41.561	36.12	27.742
BGIBMGA007351	yellow	CK_cell	gi|357629107|gb|EHJ78086.1| putative coagulation factor VIII-associated protein [Danaus plexippus]	4e-41	74.16	NA	NA	NA	NA	NA	NA	NA	NA	-7.5948	3.95568	3.57786e-07	0.000258173	NA	NA	NA	NA	0	0	0	25.602	0	28.535	0	0	0	0	0	0	10.802	0	0	0	0	0	0	0	0	11.469	0	0
BGIBMGA007362	red	Toxin_midgut	gi|512896606|ref|XP_004923951.1| PREDICTED: inositol polyphosphate multikinase-like [Bombyx mori]	0	96.26	NA	NA	NA	NA	1.12435	5.99239	5.33254e-09	4.17657e-07	NA	NA	NA	NA	NA	NA	NA	NA	4.927	6.773	7.797	4.7	4.238	4.901	5.08	5.184	4.892	63.223	56.095	65.295	8.344	8.32	7.555	4.122	3.434	5.449	6.707	6.875	7.009	134.759	125.083	134.816
BGIBMGA007401	salmon	CK_fatbody,CK_midgut	gi|607360301|gb|EZA54632.1| Nucleolar pre-ribosomal-associated protein [Cerapachys biroi]	2e-14	38.33	-1.55698	6.3473	3.11487e-14	2.34332e-12	-1.30384	4.34091	7.04677e-06	0.000268202	NA	NA	NA	NA	NA	NA	NA	NA	15.92	16.927	18.938	95.491	98.472	97.961	120.862	138.169	125.637	40.748	39.779	38.59	23.513	22.091	19.722	102.246	101.132	102.252	46.651	44.717	43.629	14.24	15.883	16.036
BGIBMGA007414	turquoise	Toxin_fatbody	gi|512896784|ref|XP_004923993.1| PREDICTED: general vesicular transport factor p115-like [Bombyx mori]	0	100	2.23963	3.38716	0.00177062	0.0165908	NA	NA	NA	NA	NA	NA	NA	NA	NA	NA	NA	NA	64.218	2.634	76.17	3.027	88.246	95.654	2.718	5.855	3.078	7.171	8.447	3.754	73.823	0.87	1.837	96.358	4.274	2.024	7.603	5.886	44.846	0.023	3.779	5.272
BGIBMGA007423	magenta	CK_hemocyte	gi|512896649|ref|XP_004923962.1| PREDICTED: S-adenosylmethionine decarboxylase proenzyme-like [Bombyx mori]	0	96.03	NA	NA	NA	NA	NA	NA	NA	NA	NA	NA	NA	NA	-1.18297	6.65068	1.32628e-09	7.87369e-08	101.844	117.054	107.638	39.208	40.592	39.036	528.101	493.094	589.48	59.01	65.139	64.098	46.744	45.723	54.221	32.06	34.123	32.08	709.5	656.209	604.445	86.675	71.683	69.477
BGIBMGA003771	pink	Toxin_midgut	gi|512904935|ref|XP_004925820.1| PREDICTED: group XV phospholipase A2-like [Bombyx mori]	0	99.74	NA	NA	NA	NA	1.36141	5.64758	1.21351e-10	1.30687e-08	NA	NA	NA	NA	NA	NA	NA	NA	89.751	87.025	85.208	105.031	114.969	110.67	281.863	299.305	299.47	42.026	40.71	45.29	80.427	75.273	69.44	109.665	112.226	117.449	432.999	431.888	410.521	109.572	106.224	110.732
BGIBMGA007442	purple	Toxin_hemocyte	gi|112982924|ref|NP_001036923.1| atypical protein kinase C [Bombyx mori] gi|71979726|dbj|BAE17023.1| atypical protein kinase C [Bombyx mori]	7e-57	100	NA	NA	NA	NA	NA	NA	NA	NA	NA	NA	NA	NA	6.63364	3.50408	0.000496977	0.00876293	0.215	0	0.433	47.441	45.951	44.721	1.177	0.262	27.641	0	1.059	0	0.431	42.948	0.551	40.676	38.726	20.269	1.145	1.188	0.634	0	0	0
BGIBMGA007443	turquoise	Toxin_hemocyte	no hints			NA	NA	NA	NA	NA	NA	NA	NA	NA	NA	NA	NA	6.14538	3.165	0.00166248	0.02508	0	0	0	0	0	0	0	0	0	0	0	2.674	30.671	0	0	0	0	0	0	0	0	0	0	0
BGIBMGA007451	turquoise	CK_fatbody	gi|512906903|ref|XP_004926310.1| PREDICTED: 1,4-alpha-glucan-branching enzyme-like [Bombyx mori]	0	96.39	-1.06719	7.62339	4.35909e-12	2.7965e-10	NA	NA	NA	NA	NA	NA	NA	NA	NA	NA	NA	NA	130.935	144.52	147.255	99.594	99.436	100.909	306.967	289	283.987	168.35	180.628	187.956	124.766	118.621	116.472	98.993	102.915	101.386	140.875	144.239	149.965	141.949	147.707	150.274
BGIBMGA007462	purple	Toxin_hemocyte	gi|512906853|ref|XP_004926297.1| PREDICTED: sialin-like [Bombyx mori]	0	100	NA	NA	NA	NA	NA	NA	NA	NA	NA	NA	NA	NA	2.74215	5.67683	3.89346e-29	1.39691e-26	8.227	10.108	11.334	3.712	3.248	2.871	8.845	8.401	9.656	3.786	3.678	3.794	68.066	73.047	68.632	3.372	6.292	3.606	7.258	6.197	6.608	4.722	4.308	3.279
BGIBMGA007466	yellow	CK_fatbody	gi|114050837|ref|NP_001040409.1| eukaryotic translation initiation factor 4E-binding protein 2 [Bombyx mori] gi|95102784|gb|ABF51333.1| eukaryotic translation initiation factor 4E-binding protein 2 [Bombyx mori]	1e-74	99.13	-1.62086	3.81972	0.000136499	0.00191336	NA	NA	NA	NA	NA	NA	NA	NA	NA	NA	NA	NA	0.252	1.713	0.453	0.17	0.22	0.382	13.776	18.564	25.499	4.083	2.495	7.197	0.491	0	0	0.522	0.187	0.345	9.29	5.137	4.13	2.745	2.211	7.209
BGIBMGA003775	blue	Toxin_midgut	gi|512904994|ref|XP_004925834.1| PREDICTED: peroxisome biogenesis factor 1-like, partial [Bombyx mori]	0	100	NA	NA	NA	NA	1.81839	3.12125	0.000107201	0.00265259	NA	NA	NA	NA	NA	NA	NA	NA	3.8	16.466	6.078	17.787	20.63	4.811	11.861	12.654	10.465	4.408	5.067	4.825	6.994	15.632	18.239	21.08	6.459	4.665	7.92	9.935	6.114	19.405	16.898	16.271
BGIBMGA007498	black	Toxin_hemocyte,Toxin_fatbody	gi|512899686|ref|XP_004924707.1| PREDICTED: zinc finger protein 704-like [Bombyx mori]	3e-82	100	2.19376	5.12615	4.20844e-20	4.58413e-18	NA	NA	NA	NA	NA	NA	NA	NA	1.00249	6.45562	1.42554e-07	5.85252e-06	45.468	44.62	47.093	7.204	3.73	4.265	17.268	14.2	10.853	16.062	18.027	16.547	86.112	87.731	105.884	4.421	5.431	4.727	71.449	64.184	67.764	23.751	31.882	24.133
BGIBMGA007499	magenta	Toxin_hemocyte,Toxin_fatbody	gi|512899686|ref|XP_004924707.1| PREDICTED: zinc finger protein 704-like [Bombyx mori]	5e-94	97.14	1.52192	3.7467	0.000136499	0.00191336	NA	NA	NA	NA	NA	NA	NA	NA	1.21452	5.9202	5.49153e-10	3.51288e-08	28.888	29.589	25.629	4.368	4.159	3.545	6.731	6.008	7.349	11.611	11.066	6.728	63.532	69.003	67.052	4.031	6.263	4.283	23.923	20.508	17.664	17.245	14.321	14.611
BGIBMGA007505	brown	Toxin_fatbody	gi|512899564|ref|XP_004924677.1| PREDICTED: ras-like GTP-binding protein RhoL-like [Bombyx mori]	3e-81	99.15	1.6256	3.8108	2.48264e-05	0.000434857	NA	NA	NA	NA	NA	NA	NA	NA	NA	NA	NA	NA	33.764	35.306	40.577	32.098	30.136	28.54	6.945	6.473	7.787	214.078	102.439	227.115	61.639	46.902	45.735	16.269	15.047	24.45	20.015	19.724	28.704	197.757	190.593	85.654
BGIBMGA003909	blue	CK_fatbody	gi|512908415|ref|XP_004926676.1| PREDICTED: deoxynucleoside kinase-like isoform X1 [Bombyx mori] gi|512908419|ref|XP_004926677.1| PREDICTED: deoxynucleoside kinase-like isoform X2 [Bombyx mori]	2e-168	100	-1.08338	5.35172	1.69077e-06	4.10217e-05	NA	NA	NA	NA	NA	NA	NA	NA	NA	NA	NA	NA	62.077	59.194	68.893	32.918	31.588	35.355	60.972	62.415	47.492	67.196	59.761	60.286	54.491	54.454	58.619	30.404	38.416	30.236	27.044	26.451	30.746	45.645	47.13	46.022
BGIBMGA007541	yellow	CK_fatbody	gi|512899342|ref|XP_004924620.1| PREDICTED: serine/arginine repetitive matrix protein 2-like [Bombyx mori]	1e-164	100	-1.20503	5.58071	4.57527e-08	1.53838e-06	NA	NA	NA	NA	NA	NA	NA	NA	NA	NA	NA	NA	61.249	64.669	64.061	77.447	77.119	78.653	67.623	69.189	70.131	75.506	73.226	69.04	70.051	69.308	71.117	83.872	81.21	79.026	29.863	29.156	34.704	44.434	43.575	37.659
BGIBMGA007546	brown	CK_fatbody	gi|512899311|ref|XP_004924612.1| PREDICTED: esterase FE4-like [Bombyx mori]	0	100	-2.75724	6.67012	8.12312e-38	1.76966e-35	NA	NA	NA	NA	NA	NA	NA	NA	NA	NA	NA	NA	0	0	0.042	0	0	0	183.8	189.892	183.628	62.11	64.408	64.876	0	0.406	0.253	0.1	1.388	0.082	29.707	26.131	29.083	41.195	33.443	40.014
BGIBMGA007553	tan	CK_midgut	gi|148298782|ref|NP_001091747.1| C-type lectin 16 precursor [Bombyx mori] gi|114796717|gb|ABI79325.1| C-type lectin [Bombyx mori]	6e-161	99.54	NA	NA	NA	NA	-1.42514	4.02552	2.08469e-05	0.000688382	NA	NA	NA	NA	NA	NA	NA	NA	0	0	0	0.884	0.228	0.108	7.709	6.558	9.97	32.311	29.843	31.834	0	0	0	0	0.466	0.292	6.143	5.306	6.31	12.071	13.473	9.319
BGIBMGA007558	black	Toxin_midgut	gi|512899354|ref|XP_004924623.1| PREDICTED: inter-alpha-trypsin inhibitor heavy chain H4-like [Bombyx mori]	0	95.4	NA	NA	NA	NA	1.62946	4.95632	3.30578e-13	5.22149e-11	NA	NA	NA	NA	NA	NA	NA	NA	6.823	7.707	8.376	9.421	7.651	8.583	8397.89	7826.33	8146.22	21.969	20.88	24.854	11.716	11.641	10.689	7.376	8.324	8.762	10828.8	10717.2	10696.9	72.987	69.197	68.814
BGIBMGA007607	turquoise	Toxin_hemocyte,Toxin_fatbody	gi|347970808|ref|XP_310433.5| AGAP003873-PA [Anopheles gambiae str. PEST] gi|333466841|gb|EAA06013.5| AGAP003873-PA [Anopheles gambiae str. PEST]	8e-113	41.2	1.24172	4.70321	3.00745e-06	6.83671e-05	NA	NA	NA	NA	NA	NA	NA	NA	1.36689	4.75138	6.0998e-06	0.000177238	11.207	10.886	10.082	3.176	3.038	2.786	16.309	15.401	19.012	7.789	8.225	10.15	29.435	29.71	26.59	3.381	4.026	3.58	41.78	40.01	41.742	10.608	13.74	12.491
BGIBMGA004056	blue	CK_fatbody	gi|512889769|ref|XP_004922368.1| PREDICTED: pentatricopeptide repeat-containing protein 2, mitochondrial-like [Bombyx mori]	9e-122	64.05	-1.21826	6.28108	1.79259e-09	8.04512e-08	NA	NA	NA	NA	NA	NA	NA	NA	NA	NA	NA	NA	26.487	28.946	30.799	112.15	108.568	115.265	107.42	125.204	113.292	126.427	118.049	115.997	32.622	32.684	32.788	120.671	113.618	120.941	52.282	51.239	49.421	74.266	70.871	74.63
BGIBMGA004095	blue	CK_fatbody	gi|597752165|ref|XP_007237946.1| PREDICTED: general transcription factor 3C polypeptide 1-like [Astyanax mexicanus]	2e-06	40.98	-1.05469	4.81579	9.05724e-05	0.00134917	NA	NA	NA	NA	NA	NA	NA	NA	NA	NA	NA	NA	50.838	51.775	45.443	41.129	40.086	43.363	37.841	39.361	36.585	52.611	53.364	54.155	45.739	42.781	45.775	43.674	40.046	42.53	21.226	19.446	14.627	46.081	37.428	42.351
BGIBMGA007651	turquoise	Toxin_fatbody	gi|512916502|ref|XP_004928656.1| PREDICTED: tenascin-like, partial [Bombyx mori]	7e-71	95.65	1.59447	5.88577	6.50502e-14	4.85879e-12	NA	NA	NA	NA	NA	NA	NA	NA	NA	NA	NA	NA	2.36	2.588	2.87	0	0	0	33.205	29.574	37.619	44.375	50.021	42.445	1.22	1.56	0.576	0	0	0	110.194	112.867	90.594	65.024	62.123	59.91
BGIBMGA004108	pink	CK_fatbody,CK_midgut	gi|512889939|ref|XP_004922411.1| PREDICTED: RNA polymerase II subunit A C-terminal domain phosphatase-like [Bombyx mori]	0	100	-1.16375	4.81529	1.94929e-05	0.000357278	-1.28132	4.03799	9.48565e-05	0.00237819	NA	NA	NA	NA	NA	NA	NA	NA	30.8	27.026	28.428	37.763	34.699	33.212	37.021	44.272	35.374	26.768	31.064	34.585	29.632	31.444	30.622	37.601	39.153	36.113	17.58	19.022	17.082	10.576	12.679	14.133
BGIBMGA007669	magenta	CK_fatbody	gi|512916434|ref|XP_004928639.1| PREDICTED: deoxynucleotidyltransferase terminal-interacting protein 2-like [Bombyx mori]	0	100	-1.34287	4.68577	4.17861e-06	9.16052e-05	NA	NA	NA	NA	NA	NA	NA	NA	NA	NA	NA	NA	14.313	22.349	20.22	26.556	22.472	25.323	38.978	38.167	31.489	32.738	27.747	28.328	18.917	38.359	22.229	27.411	27.87	30.258	15.05	13.227	15.447	17	16.38	17.363
BGIBMGA007672	purple	Toxin_hemocyte	gi|512916415|ref|XP_004928635.1| PREDICTED: ras-related protein Rab-9B-like [Bombyx mori]	3e-116	100	NA	NA	NA	NA	NA	NA	NA	NA	NA	NA	NA	NA	1.58804	5.98281	6.75327e-15	8.44363e-13	27.108	23.765	23.145	19.264	14.645	19.028	23.311	22.498	23.949	25.783	30.857	29.378	71.987	72.794	79.274	16.008	8.777	14.51	17.316	40.014	29.833	32.675	28.542	64.087
BGIBMGA007675	green	Toxin_midgut	gi|55583303|dbj|BAD69569.1| aquaporin AQP-Bom1 [Bombyx mori]	3e-35	98.48	NA	NA	NA	NA	1.2533	6.41099	1.36265e-12	2.01778e-10	NA	NA	NA	NA	NA	NA	NA	NA	0	1.532	0	0.158	0.328	0	15.045	14.41	13.793	77.875	83.675	72.127	0	0	0	0	0.716	0	27.286	17.225	23.443	200.211	175.482	173.229
BGIBMGA007677	yellow	CK_midgut	gi|114052326|ref|NP_001040470.1| gasp precursor [Bombyx mori] gi|95103030|gb|ABF51456.1| gasp precursor [Bombyx mori]	0	99.62	NA	NA	NA	NA	-1.02284	6.34648	1.58856e-08	1.11982e-06	NA	NA	NA	NA	NA	NA	NA	NA	0.313	0.262	0	0	0.187	0	287.927	251.588	292.432	150.724	173.09	163.316	0	0.447	0.36	0	3.596	0.173	185.435	198.081	190.896	84.141	76.015	76.958
BGIBMGA004155	blue	CK_fatbody	no hints			-7.11341	3.73414	5.57679e-07	1.48011e-05	NA	NA	NA	NA	NA	NA	NA	NA	NA	NA	NA	NA	35.381	38.946	32.393	0	0	0	33.735	0	32.775	36.919	0	45.739	27.018	25.523	31.359	0	0	0	0	0	0	0	40.869	0
BGIBMGA007703	yellow	Toxin_hemocyte	gi|512916161|ref|XP_004928565.1| PREDICTED: N-acetyllactosaminide beta-1,3-N-acetylglucosaminyltransferase-like isoform X1 [Bombyx mori] gi|512916165|ref|XP_004928566.1| PREDICTED: N-acetyllactosaminide beta-1,3-N-acetylglucosaminyltransferase-like isoform X2 [Bombyx mori]	6e-28	98.11	NA	NA	NA	NA	NA	NA	NA	NA	NA	NA	NA	NA	10.9846	7.50083	1.26206e-116	1.04145e-112	0	0	0	0	0	0	0	0	0	0	54.028	0	283.861	330.988	268.24	0	0	0	0	0	0	72.609	0	0
BGIBMGA007709	grey	CK_fatbody,Toxin_hemocyte,Toxin_cell	gi|512916060|ref|XP_004928540.1| PREDICTED: LOW QUALITY PROTEIN: mitochondrial-processing peptidase subunit alpha-like [Bombyx mori]	2e-45	100	-7.17152	3.77457	0.000212901	0.00276904	NA	NA	NA	NA	7.32717	3.66312	5.00291e-05	0.0166616	6.37331	3.31099	0.000917901	0.0149351	0	0	0	0	0	0	68.34	0	0	0	49.083	32.338	0	35.918	0	0	46.574	0	0	0	0	0	0	44.386
BGIBMGA007711	magenta	Toxin_cell	gi|512916905|ref|XP_004928755.1| PREDICTED: tRNA (adenine(58)-N(1))-methyltransferase non-catalytic subunit TRM6-like [Bombyx mori]	0	100	NA	NA	NA	NA	NA	NA	NA	NA	7.32717	3.66312	5.00291e-05	0.0166616	NA	NA	NA	NA	0	0	0	0	0	0	0	0	0	0	0	0	0	0	0	0	47.029	0	0	0	0	0	0	0
BGIBMGA007729	yellow	Toxin_hemocyte	gi|160333383|ref|NP_001103823.1| serine protease inhibitor 6 precursor [Bombyx mori] gi|157786102|gb|ABV74209.1| serpin-6 [Bombyx mori]	0	99.52	NA	NA	NA	NA	NA	NA	NA	NA	NA	NA	NA	NA	1.67941	9.00844	1.59986e-34	7.33449e-32	184.37	200.319	205.118	24.8	23.591	26.588	6.372	9.111	6.123	5.535	3.999	5.179	634.581	646.933	644.643	23.638	26.141	23.369	11.27	7.672	9.998	4.067	4.428	5.58
BGIBMGA007731	magenta	CK_midgut	gi|512916845|ref|XP_004928740.1| PREDICTED: collagen alpha-1(III) chain-like [Bombyx mori]	0	100	NA	NA	NA	NA	-1.01401	6.69206	9.40425e-09	6.90884e-07	NA	NA	NA	NA	NA	NA	NA	NA	110.359	169.362	146.994	243.303	263.836	246.612	353.061	302.05	401.697	201.514	200.802	219.245	202.104	193.081	202.729	213.526	219.369	216.463	274.161	259.931	266.925	94.662	117.979	89.928
BGIBMGA007735	turquoise	Toxin_fatbody	gi|357624813|gb|EHJ75445.1| ABC transporter family C protein ABCC2 [Danaus plexippus]	0	71.21	1.6433	3.37654	0.000391759	0.00463944	NA	NA	NA	NA	NA	NA	NA	NA	NA	NA	NA	NA	1.735	1.717	2.052	3.579	3.878	3.899	5.213	4.674	4.104	316.718	329.181	316.909	1.974	2.378	1.879	4.55	5.4	4.548	17.043	15.744	14.888	256.774	248.713	244.694
BGIBMGA004164	blue	CK_midgut	gi|512897909|ref|XP_004924268.1| PREDICTED: transcription factor jun-D-like [Bombyx mori]	3e-176	99.59	NA	NA	NA	NA	-8.86215	4.96729	3.15994e-06	0.000130772	NA	NA	NA	NA	NA	NA	NA	NA	403.256	0	0	0	316.948	0	144.013	0	0	0	252.006	0	775.425	867.651	0	248.824	304.237	0	0	720.319	0	0	0	0
BGIBMGA007789	tan	CK_hemocyte	gi|307611921|ref|NP_001182627.1| cryptochrome 2 [Bombyx mori] gi|306416110|gb|ADM86933.1| cryptochrome 2 [Bombyx mori] gi|306416114|gb|ADM86935.1| cryptochrome 2 [Bombyx mori]	0	99.06	NA	NA	NA	NA	NA	NA	NA	NA	NA	NA	NA	NA	-1.01821	5.96639	1.95295e-07	7.86135e-06	59.976	68.073	64.275	56.728	61.749	60.001	34.665	37.149	35.744	56.516	60.163	52.281	32.288	31.779	31.78	63.591	59.458	62.393	35.059	36.282	34.59	46.467	49.738	49.796
BGIBMGA004268	pink	CK_fatbody	gi|512902337|ref|XP_004925351.1| PREDICTED: N-acetyltransferase ESCO1-like [Bombyx mori]	0	99.77	-1.10781	4.65676	0.000142333	0.00198185	NA	NA	NA	NA	NA	NA	NA	NA	NA	NA	NA	NA	44.814	40.646	45.29	130.069	126.798	134.857	35.011	34.629	31.907	12.849	14.152	13.01	33.927	35.424	31.791	130.498	130.59	127.797	18.729	15.05	15.392	4.298	4.493	6.319
BGIBMGA007812	yellow	Toxin_hemocyte	gi|512916875|ref|XP_004928748.1| PREDICTED: regulating synaptic membrane exocytosis protein 2-like [Bombyx mori]	0	93.58	NA	NA	NA	NA	NA	NA	NA	NA	NA	NA	NA	NA	3.21246	3.04638	6.63877e-05	0.00151673	0.586	0.732	0.666	21.663	20.878	19.958	2.143	1.498	2.18	8.563	8.883	9.197	7.501	8.503	8.859	21.501	22.375	22.101	3.697	4.44	4.437	13.683	14.624	12.807
BGIBMGA007816	turquoise	Toxin_fatbody	gi|568254332|gb|ETN63304.1| raw [Anopheles darlingi]	4e-62	30.47	1.02748	5.42247	8.27695e-07	2.11619e-05	NA	NA	NA	NA	NA	NA	NA	NA	NA	NA	NA	NA	51.126	50.443	43.906	3.491	3.633	3.378	34.878	27.845	31.619	28.719	29.841	26.397	70.345	73.183	65.333	3.902	4.296	3.691	68.938	69.182	60.666	24.191	26.302	21.768
BGIBMGA007829	brown	Toxin_hemocyte	gi|512916072|ref|XP_004928543.1| PREDICTED: uncharacterized protein LOC101740597 isoform X1 [Bombyx mori]	0	100	NA	NA	NA	NA	NA	NA	NA	NA	NA	NA	NA	NA	2.40867	4.14698	2.05494e-08	9.58041e-07	2.9	4.102	3.98	0.219	0	0.146	0.813	1.001	1.095	0.922	0.347	0.822	20.757	20.096	21.311	0	0	0.381	1.066	2.429	1.495	0	0	0.546
BGIBMGA007852	magenta	Toxin_fatbody	gi|512916185|ref|XP_004928571.1| PREDICTED: carbohydrate sulfotransferase 4-like [Bombyx mori]	0	99.47	1.1754	5.54585	0.00316081	0.0268284	NA	NA	NA	NA	NA	NA	NA	NA	NA	NA	NA	NA	66.745	70.144	359.572	216.861	539.638	564.688	46.957	26.013	23.843	25.454	28.063	30.534	64.942	120.812	56.748	581.136	98.354	100.348	103.906	25.109	97.999	25.497	21.471	26.846
BGIBMGA007856	turquoise	CK_fatbody	gi|512916199|ref|XP_004928573.1| PREDICTED: kynurenine formamidase-like [Bombyx mori]	8e-110	100	-2.98868	2.86294	0.000157414	0.00214612	NA	NA	NA	NA	NA	NA	NA	NA	NA	NA	NA	NA	0	1.473	1.951	1.874	0.662	2.54	9.052	8.335	10.14	0.461	0.734	0	0.501	4.912	1.861	0.537	0.653	0.94	0.617	1.943	1.349	0.526	0.804	0.423
BGIBMGA004328	blue	CK_fatbody	gi|512902377|ref|XP_004925361.1| PREDICTED: endonuclease G, mitochondrial, partial [Bombyx mori]	0	100	-1.0904	5.22286	2.56783e-06	5.92755e-05	NA	NA	NA	NA	NA	NA	NA	NA	NA	NA	NA	NA	26.948	26.792	27.57	35.433	31.683	34.281	51.987	50.784	51.746	57.846	57.195	62.309	25.132	19.874	27.238	31.965	32.32	32.598	26.298	20.195	28.907	28.943	38.121	39.907
BGIBMGA004581	greenyellow	Toxin_fatbody	gi|512894706|ref|XP_004923494.1| PREDICTED: serine/arginine repetitive matrix protein 1-like [Bombyx mori]	0	100	1.31418	3.50184	0.00382924	0.0312343	NA	NA	NA	NA	NA	NA	NA	NA	NA	NA	NA	NA	5.591	3.065	3.226	2.477	1.704	1.36	9.025	4.514	4.993	65.142	59.442	56.273	4.986	4.707	4.786	1.627	1.419	1.472	16.261	13.694	17.794	70.273	57.133	62.128
BGIBMGA007870	magenta	CK_midgut	gi|512916973|ref|XP_004928772.1| PREDICTED: probable ATP-dependent RNA helicase CG8611-like [Bombyx mori]	0	99.76	NA	NA	NA	NA	-1.22172	4.28684	4.03665e-05	0.00118247	NA	NA	NA	NA	NA	NA	NA	NA	18.612	18.385	19.181	99.77	103.544	105.004	51.727	63.01	53.677	36.801	38.168	35.765	25.657	26.493	27.841	111.117	103.659	101.463	31.663	31.572	27.697	18.739	16.01	13.799
BGIBMGA007883	magenta	CK_hemocyte	no hints			NA	NA	NA	NA	NA	NA	NA	NA	NA	NA	NA	NA	-8.29134	4.93988	4.958e-31	2.04567e-28	61.15	36.623	39.891	0	0	0	0	0	0	0	0	0	0	0	0	1.893	0	0	0	0	0	0	0	0
BGIBMGA007899	purple	CK_fatbody,CK_midgut	gi|512916360|ref|XP_004928622.1| PREDICTED: probable chitinase 3-like [Bombyx mori]	3e-173	100	-1.15062	5.60741	1.33568e-07	4.02513e-06	-1.46104	4.76014	8.47143e-09	6.4227e-07	NA	NA	NA	NA	NA	NA	NA	NA	0	0	0.088	0	0.091	0.105	76.088	65.476	68.503	53.117	54.632	57.412	0.331	0	0	0	0	0	33.533	33.079	30.183	23.508	18.047	17.849
BGIBMGA007955	turquoise	CK_fatbody	gi|512916617|ref|XP_004928684.1| PREDICTED: probable ribosome production factor 1-like [Bombyx mori]	0	100	-1.15125	6.52889	4.25081e-09	1.76392e-07	NA	NA	NA	NA	NA	NA	NA	NA	NA	NA	NA	NA	32.987	41.455	34.753	57.686	59.466	59.253	136.516	150.77	122.181	60.205	62.594	70.486	47.991	41.345	47.65	62.794	63.155	65.721	59.917	65.106	66.983	44.711	40.256	31.905
BGIBMGA007987	tan	Toxin_hemocyte,Toxin_fatbody	gi|584596300|gb|AHJ11178.1| peptidoglycan recognition protein S2 [Bombyx mori]	2e-140	99.49	5.05133	7.81791	3.81397e-125	2.49267e-122	NA	NA	NA	NA	NA	NA	NA	NA	1.27143	5.00604	3.53371e-06	0.000108402	13.166	12.105	15.159	1.829	2.165	1.424	13.893	16.667	14.988	371.747	398.876	382.149	35.404	32.913	33.746	1.513	1.961	1.761	522.667	544.015	527.072	544.859	572.238	562.214
BGIBMGA008005	magenta	CK_hemocyte	gi|512892407|ref|XP_004922924.1| PREDICTED: protein FAM46C-like isoform X1 [Bombyx mori]	2e-77	100	NA	NA	NA	NA	NA	NA	NA	NA	NA	NA	NA	NA	-1.05749	5.15103	5.56548e-05	0.00131218	31.868	36.638	37.343	0	0.292	0	25.171	26.229	29.839	78.391	91.479	90.64	18.194	16.468	16.023	0.341	1.769	0	24.569	28.544	29.826	148.98	134.791	112.082
BGIBMGA004655	greenyellow	CK_midgut	gi|512910155|ref|XP_004927098.1| PREDICTED: fatty acid synthase-like [Bombyx mori]	0	92.38	NA	NA	NA	NA	-1.04617	5.17325	8.14228e-07	3.93696e-05	NA	NA	NA	NA	NA	NA	NA	NA	73.09	47.978	47.273	158.618	115.793	111.006	1425.67	1156.79	1503.5	63.7	69.769	75.446	42.083	47.053	40.752	116.278	134.923	102.784	863.87	880.627	810.285	30.975	36.93	31.493
BGIBMGA004981	greenyellow	CK_midgut	gi|512899208|ref|XP_004924586.1| PREDICTED: putative leucine-rich repeat-containing protein DDB_G0290503-like [Bombyx mori]	0	100	NA	NA	NA	NA	-1.78513	5.54171	1.91148e-16	4.21282e-14	NA	NA	NA	NA	NA	NA	NA	NA	12.579	12.552	15.846	5.053	3.773	4.751	12.264	12.423	9.766	102.073	108.979	101.753	18.539	17.904	17.77	6.207	5.367	3.988	11.181	16.462	15.071	26.364	31.324	30.592
BGIBMGA008029	turquoise	CK_fatbody	gi|512892506|ref|XP_004922948.1| PREDICTED: probable allantoicase-like [Bombyx mori]	2e-160	100	-2.87465	5.49684	7.93077e-26	1.09121e-23	NA	NA	NA	NA	NA	NA	NA	NA	NA	NA	NA	NA	0.733	0	0.28	0	0	0	89.672	79.119	67.972	2.289	1.366	0	0	0	0	0	0	0	11.329	9.92	12.644	1.01	1.188	1.395
BGIBMGA008034	brown	CK_hemocyte	gi|512892230|ref|XP_004922880.1| PREDICTED: tyrosine kinase receptor Cad96Ca-like [Bombyx mori]	0	99.62	NA	NA	NA	NA	NA	NA	NA	NA	NA	NA	NA	NA	-1.47997	6.34639	1.41257e-14	1.66522e-12	83.428	99.891	93.475	74.431	71.675	79.078	27.004	41.272	37.022	10.864	11.619	11.821	38.536	29.692	32.905	69.647	66.403	59.609	27.255	28.872	25.867	9.247	7.931	7.242
BGIBMGA008035	brown	CK_hemocyte,CK_fatbody	gi|512892230|ref|XP_004922880.1| PREDICTED: tyrosine kinase receptor Cad96Ca-like [Bombyx mori]	2e-25	87.5	-1.97207	2.86443	0.00409187	0.0330159	NA	NA	NA	NA	NA	NA	NA	NA	-3.4629	4.1853	1.32026e-10	9.55683e-09	33.225	19.227	16.791	0	0	15.76	10.439	9.801	5.607	4.819	0	0	0	5.964	0	12.031	15.285	12.673	0	5.383	0	3.725	4.923	3.625
BGIBMGA008036	salmon	CK_hemocyte	gi|512892230|ref|XP_004922880.1| PREDICTED: tyrosine kinase receptor Cad96Ca-like [Bombyx mori]	0	97.56	NA	NA	NA	NA	NA	NA	NA	NA	NA	NA	NA	NA	-1.22527	5.3493	4.79771e-07	1.76744e-05	45.808	41.641	41.966	25.677	30.025	31.062	26.326	20.851	23.685	6.435	6.865	8.669	16.399	22.329	16.891	22.476	26.805	26.551	17.133	16.952	13.457	5.102	4.342	6.784
BGIBMGA008064	magenta	CK_hemocyte,CK_fatbody,CK_midgut	gi|512892534|ref|XP_004922955.1| PREDICTED: chitooligosaccharidolytic beta-N-acetylglucosaminidase-like, partial [Bombyx mori]	6e-83	98.39	-2.23949	4.04289	6.47826e-08	2.07801e-06	-1.67523	4.07505	7.53074e-07	3.69787e-05	NA	NA	NA	NA	-1.40006	6.38464	2.51965e-12	2.3362e-10	87.712	106.012	88.201	0	0	0	28.009	20.789	25.416	28.291	34.645	38.723	31.717	41.248	35.737	0	0	0	5.034	6.577	3.576	8.803	11.943	10.394
BGIBMGA008074	turquoise	CK_fatbody	gi|512892383|ref|XP_004922918.1| PREDICTED: phosphatidylinositol-glycan biosynthesis class F protein-like [Bombyx mori]	4e-169	100	-8.30714	4.77796	1.33922e-05	0.000258858	NA	NA	NA	NA	NA	NA	NA	NA	NA	NA	NA	NA	0	0	60.539	0	0	0	0	0	151.417	0	0	0	47.679	41.161	49.27	0	0	0	0	0	0	0	0	0
BGIBMGA005061	blue	Toxin_fatbody	gi|160333889|ref|NP_001037055.1| TFIIB-related factor [Bombyx mori] gi|22417141|gb|AAM96688.1| TFIIB-related Factor [Bombyx mori]	2e-99	98.66	1.73735	2.91507	0.00232639	0.0206617	NA	NA	NA	NA	NA	NA	NA	NA	NA	NA	NA	NA	2.837	2.589	2.543	0.284	0.954	1.668	2.181	4.177	2.682	4.793	2.197	2.054	1.636	1.804	2.148	0	0	4.713	8.273	12.111	10.273	4.292	2.171	4.258
BGIBMGA008100	turquoise	Toxin_fatbody,Toxin_midgut	gi|512903599|ref|XP_004925659.1| PREDICTED: uncharacterized protein LOC101735549 isoform X3 [Bombyx mori]	5e-71	99.07	2.12771	2.84002	0.00152067	0.0145353	1.20721	3.86651	0.000276359	0.00599327	NA	NA	NA	NA	NA	NA	NA	NA	8.728	6.704	9.299	0.455	0	1.926	1.81	1.002	2.972	7.292	11.022	16.518	5.317	16.7	6.832	0	1.041	0.845	11.221	13.556	5.193	26.555	34.771	22.837
BGIBMGA008110	brown	CK_midgut,Toxin_fatbody	no hints			1.21369	9.58876	1.66458e-22	1.97801e-20	-1.97144	3.65447	1.81692e-06	8.04624e-05	NA	NA	NA	NA	NA	NA	NA	NA	0.073	0	0	1.085	0.99	1.173	533.577	535.959	512.294	23.323	25.065	26.525	0	0	0	1.028	1.536	1.422	1285.56	1262.4	1243.67	5.877	7.14	6.658
BGIBMGA008128	turquoise	CK_midgut	gi|512895911|ref|XP_004923786.1| PREDICTED: probable serine/threonine-protein kinase kinX-like [Bombyx mori]	0	100	NA	NA	NA	NA	-1.50328	7.12839	4.74393e-21	1.79833e-18	NA	NA	NA	NA	NA	NA	NA	NA	0	0	0	0.062	0.125	0	0.39	0.732	0.184	317.978	310.717	304.925	0	0	0	0.142	0	0.084	0.015	0.849	0.308	118.174	109.978	96.961
BGIBMGA008134	black	CK_fatbody	gi|223890164|ref|NP_001138797.1| GTP cyclohydrolase I isoform B [Bombyx mori] gi|220983695|dbj|BAH11150.1| GTP cyclohydrolase I isoform B [Bombyx mori]	9e-53	100	-10.4303	6.7377	6.38666e-09	2.52975e-07	NA	NA	NA	NA	NA	NA	NA	NA	NA	NA	NA	NA	0	0	0.393	0.485	0.612	0.876	335.677	0	327.043	0	0	0	4.432	6.275	0	0.283	0.194	0	0	0	0	0	1.331	1.478
BGIBMGA008164	salmon	CK_hemocyte	gi|525343298|ref|NP_001266332.1| low molecular mass 30 kDa lipoprotein 19G1-like [Bombyx mori] gi|379046502|gb|AFC87812.1| 30K protein 14 [Bombyx mori]	0	100	NA	NA	NA	NA	NA	NA	NA	NA	NA	NA	NA	NA	-1.25906	7.11423	1.05009e-09	6.37157e-08	125.027	177.048	157.504	0	0	1.801	0	0	0.006	0	0	1.326	71.322	49.602	75.864	0	7.509	0.013	0	0	3.888	0	0	0
BGIBMGA008205	salmon	CK_hemocyte	gi|119514503|gb|ABL76064.1| cationic peptide CP8 precursor [Bombyx mandarina]	5e-52	97.67	NA	NA	NA	NA	NA	NA	NA	NA	NA	NA	NA	NA	-3.05827	3.00163	0.000121684	0.00255506	5.585	9.43	7.807	0	0	0	13.339	18.372	15.89	0	0	0	1.505	0	1.125	0	0.512	0	0.4	35.434	33.942	0	0	0
BGIBMGA005277	greenyellow	Toxin_fatbody	gi|223671105|tpd|FAA00504.1| TPA: putative cuticle protein [Bombyx mori]	1e-96	100	3.7758	6.61905	7.52476e-57	2.31431e-54	NA	NA	NA	NA	NA	NA	NA	NA	NA	NA	NA	NA	0.62	0	0	0	0	0	17.15	13.855	15.935	3.847	0.589	1.373	0	0.973	0.537	0	0	0.031	232.185	246.507	192.388	5.209	2.229	1.048
BGIBMGA005278	blue	Toxin_fatbody	gi|290563263|ref|NP_001166744.1| cuticular protein RR-1 motif 3 precursor [Bombyx mori] gi|223671107|tpd|FAA00505.1| TPA: putative cuticle protein [Bombyx mori]	2e-62	99	1.16344	6.70813	1.37095e-08	5.0837e-07	NA	NA	NA	NA	NA	NA	NA	NA	NA	NA	NA	NA	0	0	0	0.298	0.167	0	87.072	78.036	55.941	29.914	24.855	23.746	0.392	0.27	0.267	0	0	0.073	166.079	193.867	148.81	20.719	19.245	21.464
BGIBMGA008255	yellow	Toxin_fatbody	gi|223670982|tpd|FAA00442.1| TPA: putative cuticle protein [Bombyx mori]	0	97.19	3.87737	4.04007	2.96556e-19	3.07038e-17	NA	NA	NA	NA	NA	NA	NA	NA	NA	NA	NA	NA	0	0	0	0	0	0	1.776	1.528	3.562	1.696	1.075	0.718	0	0	0	0	0	0	39.008	34.814	32.004	1.309	1.341	0.43
BGIBMGA005395	greenyellow	CK_fatbody,CK_midgut	gi|383849930|ref|XP_003700586.1| PREDICTED: RISC-loading complex subunit tarbp2-like [Megachile rotundata]	1e-148	65.49	-1.18875	6.92648	1.57859e-11	9.43278e-10	-1.05528	6.04406	3.64669e-08	2.38343e-06	NA	NA	NA	NA	NA	NA	NA	NA	79.483	92.885	85.554	129.007	125.53	122.857	185.903	181.884	180.923	132.538	136.41	126.443	72.622	70.408	77.758	118.525	128.964	128.511	75.925	88.3	84.629	59.772	64.337	62.447
BGIBMGA008317	magenta	CK_hemocyte	gi|304421422|gb|ADM32510.1| app [Bombyx mori]	0	100	NA	NA	NA	NA	NA	NA	NA	NA	NA	NA	NA	NA	-1.41679	5.50512	8.87335e-10	5.4644e-08	50.186	53.328	46.226	0	0.043	0.036	4.22	3.58	3.985	0.258	0.084	0.324	18.315	19.73	17.951	0	0.054	0.036	3.251	3.388	3.734	0.869	0.886	0.916
BGIBMGA008324	red	Toxin_fatbody	gi|512915614|ref|XP_004928432.1| PREDICTED: hormone-sensitive lipase-like [Bombyx mori]	1e-47	98.72	6.19071	2.80064	0.000866839	0.00909181	NA	NA	NA	NA	NA	NA	NA	NA	NA	NA	NA	NA	0	0	0	0	0	0	0	0	0	0	0	0	0	0	0	0	0	0	34.514	0	0	0	0	0
BGIBMGA008339	purple	CK_hemocyte,CK_cell,CK_fatbody	gi|512915547|ref|XP_004928416.1| PREDICTED: muscle M-line assembly protein unc-89-like [Bombyx mori]	0	100	-5.93052	2.82419	0.0024435	0.021654	NA	NA	NA	NA	-7.99116	4.31222	7.67027e-06	0.00343383	-8.63005	5.20178	1.91342e-08	9.0226e-07	94.006	75.532	0	0	71.64	0	0	28.791	0	0	0	0	0	0	0	0	0	0	0	0	0	0	0	0
BGIBMGA008344	brown	CK_hemocyte,CK_fatbody	gi|512914867|ref|XP_004928248.1| PREDICTED: CLK4-associating serine/arginine rich protein-like [Bombyx mori]	1e-102	100	-6.13251	2.96727	1.53459e-05	0.000288619	NA	NA	NA	NA	NA	NA	NA	NA	-6.5354	3.52229	3.48218e-06	0.00010722	0	21.529	16.898	0	12.704	0	15.727	17.428	0	0	20.913	0	0	0	0	0	0	0	0	0	0	0	0	14.56
BGIBMGA008402	black	CK_hemocyte	gi|91077816|ref|XP_970500.1| PREDICTED: similar to CG13175 CG13175-PA [Tribolium castaneum]	3e-27	42.86	NA	NA	NA	NA	NA	NA	NA	NA	NA	NA	NA	NA	-2.17082	4.38325	0.00218285	0.030844	9.451	6.228	52.924	5.168	3.654	6.158	5.59	10.896	18.933	2.883	2.887	2.106	5.999	2.784	7.12	4.292	3.804	2.385	7.791	6.943	4.422	15.887	3.049	1.214
BGIBMGA008422	red	Toxin_hemocyte,Toxin_fatbody	gi|357603599|gb|EHJ63841.1| endonuclease-reverse transcriptase [Danaus plexippus]	2e-07	32.35	4.14766	8.17521	1.75473e-112	1.0194e-109	NA	NA	NA	NA	NA	NA	NA	NA	1.90314	7.74173	5.50135e-31	2.16177e-28	73.497	69.89	71.922	125.935	133.933	135.048	31.702	34.287	40.94	0.586	0.968	1.117	283.963	253.797	285.257	135.342	150.327	139.17	668.144	647.322	662.83	2.803	1.764	2.438
BGIBMGA008448	turquoise	Toxin_hemocyte,Toxin_fatbody	no hints			1.04757	4.64579	0.000119061	0.00170085	NA	NA	NA	NA	NA	NA	NA	NA	1.13557	7.45574	1.55401e-12	1.49113e-10	87.178	90.215	84.213	80.64	85.103	83.822	16.798	17.116	18.453	7.471	6.41	6.275	187.236	201.319	197.648	78.086	79.535	78.632	36.937	38.816	37.675	13.987	14.166	5.605
BGIBMGA008451	tan	Toxin_hemocyte,Toxin_fatbody	gi|512914670|ref|XP_004928200.1| PREDICTED: inositol-trisphosphate 3-kinase B-like [Bombyx mori]	0	97.21	1.19939	4.81537	2.19783e-06	5.14153e-05	NA	NA	NA	NA	NA	NA	NA	NA	1.07869	6.81243	2.77733e-09	1.49794e-07	55.701	56.317	60.001	18.494	18.005	20.869	16.676	19.72	19.214	13.725	16.757	11.464	118.557	122.504	127.663	18.151	21.456	21.612	43.286	45.374	43.494	23.955	21.513	26.799
BGIBMGA005590	greenyellow	CK_fatbody	gi|201023285|ref|NP_001128388.1| deoxyhypusine hydroxylase/monooxygenase [Bombyx mori] gi|197725932|gb|ACH73154.1| lethal s1921 [Bombyx mori]	0	99.34	-1.03452	6.14328	5.19223e-07	1.38862e-05	NA	NA	NA	NA	NA	NA	NA	NA	NA	NA	NA	NA	81.022	99.21	95.992	187.598	197.271	208.027	93.561	106.272	101.887	364.807	350.458	345.974	95.748	94.559	92.226	209.487	203.962	202.689	46.592	52.967	53.183	236.481	212.567	240.49
BGIBMGA008492	red	Toxin_midgut	gi|512914891|ref|XP_004928254.1| PREDICTED: cytochrome b561 domain-containing protein 1-like [Bombyx mori]	6e-60	61.01	NA	NA	NA	NA	4.6042	5.75955	1.50862e-58	2.38287e-55	NA	NA	NA	NA	NA	NA	NA	NA	0	0	0	0	0	0	0.847	0.889	2.876	7.233	5.891	5.684	0	0	0	0	0	0	1.922	1.679	0.007	154.335	169.168	161.074
BGIBMGA008507	magenta	Toxin_fatbody,Toxin_midgut	gi|158635973|ref|NP_001040519.1| mitochondrial import inner membrane translocase subunit Tim9A [Bombyx mori] gi|95102726|gb|ABF51304.1| mitochondrial import inner membrane translocase subunit Tim9A [Bombyx mori]	3e-49	100	1.90911	3.52966	0.000895018	0.00927572	3.79468	3.99158	3.97456e-05	0.00118078	NA	NA	NA	NA	NA	NA	NA	NA	25.372	17.132	29.286	2.379	0.798	2.677	4.475	6.809	3.547	3.158	2.064	3.596	0.373	28.165	0.166	3.107	2.211	2.778	26.744	2.627	27.052	56.496	0	78.071
BGIBMGA008514	green	CK_fatbody	gi|512915582|ref|XP_004928424.1| PREDICTED: transmembrane protease serine 9-like [Bombyx mori]	0	100	-1.35133	3.4352	0.00543353	0.0419324	NA	NA	NA	NA	NA	NA	NA	NA	NA	NA	NA	NA	0	0	0	0.121	0	0.17	14.904	13.837	10.374	4847.3	4839.36	4834.74	0	0	0	0	0.132	0.147	5.184	5.395	3.562	3800.37	3782	3719.4
BGIBMGA005812	blue	Toxin_cell,Toxin_fatbody	gi|408535165|dbj|BAM62792.1| arginine kinase isoform 2 [Bombyx mori]	0	100	1.50149	5.534	1.28977e-13	9.43157e-12	NA	NA	NA	NA	7.11002	3.48444	9.54467e-05	0.0275491	NA	NA	NA	NA	0.194	0.139	0	0.286	0.081	0.225	28.352	24.571	28.825	1345.63	1481.13	1487.51	0.257	0.169	0	0	40.206	0.078	83.091	81.491	76.3	1305.52	1335.6	1181.62
BGIBMGA008613	black	Toxin_fatbody	gi|512910218|ref|XP_004927114.1| PREDICTED: phosphatidylinositol 4-kinase type 2-beta-like [Bombyx mori]	2e-22	97.92	6.0997	2.68091	1.29628e-05	0.000251488	NA	NA	NA	NA	NA	NA	NA	NA	NA	NA	NA	NA	0	0	0	17.846	12.5	14.095	0	0	0	21.592	25.081	0	10.902	0	0	16.545	0	12.182	15.913	16.263	0	20.651	0	19.02
BGIBMGA008621	black	CK_fatbody,CK_midgut	gi|512910163|ref|XP_004927100.1| PREDICTED: 3-hydroxyacyl-CoA dehydrogenase type-2-like [Bombyx mori]	0	100	-1.40483	5.91452	1.55018e-10	8.06477e-09	-1.26112	5.04065	8.28167e-09	6.32947e-07	NA	NA	NA	NA	NA	NA	NA	NA	19.612	23.581	25.901	77.033	75.547	80.725	82.208	100.382	91.783	71.539	65.522	62.384	32.031	26.824	24.419	87.012	88.571	90.758	35.262	36.782	35.962	23.813	27.275	29.716
BGIBMGA008636	black	Toxin_midgut	gi|512910066|ref|XP_004927076.1| PREDICTED: dystrophin, isoforms A/C/F/G/H-like [Bombyx mori]	3e-58	98.99	NA	NA	NA	NA	2.77485	3.87554	3.09641e-13	5.05943e-11	NA	NA	NA	NA	NA	NA	NA	NA	18.553	6.624	15.91	16.094	12.237	16.755	21.615	23.995	28.758	1.998	0.141	12.768	10.851	6.307	20.393	13.848	12.354	6.187	45.3	38.486	17.412	36.301	33.984	38.07
BGIBMGA008668	yellow	Toxin_fatbody	gi|112982842|ref|NP_001036891.1| clip domain serine protease 4 precursor [Bombyx mori] gi|20372973|dbj|BAB91156.1| serine protease [Bombyx mori]	0	98.64	2.39784	7.34741	1.91394e-44	4.76526e-42	NA	NA	NA	NA	NA	NA	NA	NA	NA	NA	NA	NA	0.373	1.357	1.401	103.516	101.277	98.954	66.503	53.542	60.475	14.9	13.686	14.424	2.427	4.071	2.941	91.925	95.169	98.141	332.757	329.625	323.867	16.754	11.948	12.518
BGIBMGA008675	yellow	Toxin_fatbody	gi|512904789|ref|XP_004925783.1| PREDICTED: probable 28S ribosomal protein S26, mitochondrial-like [Bombyx mori]	2e-152	100	2.68523	2.23328	0.00342422	0.0285999	NA	NA	NA	NA	NA	NA	NA	NA	NA	NA	NA	NA	0	0.189	1.224	0	1.547	0	1.839	0	0.343	0	1.007	0.184	1.609	1.969	0.696	1.328	0.742	0.113	8.736	4.966	4.287	0	4.751	0
BGIBMGA008676	brown	CK_hemocyte	gi|389610093|dbj|BAM18658.1| unknown unsecreted protein [Papilio xuthus]	8e-48	60.61	NA	NA	NA	NA	NA	NA	NA	NA	NA	NA	NA	NA	-2.40996	4.52968	4.87571e-11	3.86869e-09	30.43	26.363	25.246	29.655	0.593	31.601	23.461	29.905	5.521	8.342	3.658	7.713	1.637	9.32	5.167	32.835	93.502	103.139	19.866	28.16	23.115	11.454	13.211	13.078
BGIBMGA008683	turquoise	Toxin_fatbody	no hints			1.67599	3.48172	0.000143654	0.001997	NA	NA	NA	NA	NA	NA	NA	NA	NA	NA	NA	NA	0	0.126	0.125	1.881	2.452	3.334	5.34	3.218	6.432	0.959	1.986	0.635	0.422	0.584	0.803	1.448	2.326	1.636	10.68	19.019	23.658	0.593	1.795	1.764
BGIBMGA008741	grey	Toxin_midgut	no hints			NA	NA	NA	NA	4.78052	1.70183	0.001956	0.0295646	NA	NA	NA	NA	NA	NA	NA	NA	0	0	0	0	0	0	0	0	0	0	0	0	0	0	0	0	0	0	0	0	0	3.167	3.968	5.732
BGIBMGA008753	green	Toxin_fatbody	gi|512908510|ref|XP_004926699.1| PREDICTED: zinc finger protein 226-like [Bombyx mori]	0	100	4.75246	1.91342	0.00643875	0.0483643	NA	NA	NA	NA	NA	NA	NA	NA	NA	NA	NA	NA	0	0	0	0	0	0	0	0	0	0	0	0	0	0	0	0	0	0	0	5.007	9.556	0	0	0
BGIBMGA006217	pink	Toxin_midgut	gi|307169597|gb|EFN62203.1| 120.7 kDa protein in NOF-FB transposable element [Camponotus floridanus]	7e-27	32.88	NA	NA	NA	NA	6.37591	2.6701	0.000798183	0.0147167	NA	NA	NA	NA	NA	NA	NA	NA	0	0	0	0	0	0	0	0	0	0	0	0	0	0	0	0	0	0	0	0	0	0	0	42.571
BGIBMGA008861	tan	Toxin_fatbody	gi|114051976|ref|NP_001040443.1| troponin C 25D [Bombyx mori] gi|95102914|gb|ABF51398.1| troponin C 25D [Bombyx mori] gi|168472701|gb|ACA24126.1| troponin C 25D [Bombyx mandarina]	1e-102	100	2.43303	8.7413	8.12638e-62	3.03491e-59	NA	NA	NA	NA	NA	NA	NA	NA	NA	NA	NA	NA	0	0.352	0.46	0	0	0	151.079	162.385	146.98	2606.83	2729.11	2727.26	0	0	0.52	0	0	0	862.727	837.374	875.138	3910.59	3859.07	4119.35
BGIBMGA008925	turquoise	CK_midgut	gi|114051311|ref|NP_001040110.1| cytidine deaminase [Bombyx mori] gi|87248087|gb|ABD36096.1| cytidine deaminase [Bombyx mori]	4e-91	97.76	NA	NA	NA	NA	-1.15607	6.55092	3.49153e-11	4.03527e-09	NA	NA	NA	NA	NA	NA	NA	NA	2.192	2.294	2.271	2.185	1.213	0.938	4.269	4.466	5.767	205.154	183.213	192.088	1	2.221	0.684	1.876	2.686	1.543	3.425	6.853	7.948	84.984	80.511	90.156
BGIBMGA006241	blue	CK_fatbody	gi|512903725|ref|XP_004925688.1| PREDICTED: LOW QUALITY PROTEIN: solute carrier family 25 member 40-like [Bombyx mori]	1e-60	91.74	-1.0881	5.10513	8.37801e-06	0.000168155	NA	NA	NA	NA	NA	NA	NA	NA	NA	NA	NA	NA	28.45	37.902	40.551	55.562	65.165	65.307	43.058	48.922	50.012	59.02	50.25	44.751	30.19	31.265	28.313	61.69	60.441	59.635	22.313	21.306	26.53	32.363	28.49	28.929
BGIBMGA008966	green	CK_fatbody	gi|114051632|ref|NP_001040418.1| LSM Sm-like protein family member [Bombyx mori] gi|95102812|gb|ABF51347.1| LSM Sm-like protein family member [Bombyx mori]	5e-65	99.02	-1.03532	5.12959	2.53858e-05	0.000442432	NA	NA	NA	NA	NA	NA	NA	NA	NA	NA	NA	NA	45.624	37.298	36.508	123.751	135.94	138.559	46.539	56.279	40.756	46.932	32.683	49.447	46.634	48.183	42.22	157.509	137.153	138.565	23.298	19.423	28.889	23.73	27.929	30.735
BGIBMGA009027	red	CK_hemocyte	gi|379327811|gb|AFD02109.1| silkworm storage protein [Bombyx mori]	0	100	NA	NA	NA	NA	NA	NA	NA	NA	NA	NA	NA	NA	-3.25645	3.12553	1.95559e-05	0.000520565	10.216	8.077	7.254	0	0	0.143	3868.98	4182.87	3880.88	1.745	2.39	2.331	0.774	0.454	0.802	0.158	0.456	0.065	5289.05	5224.56	5127.07	3.337	1.321	2.54
BGIBMGA009028	magenta	CK_hemocyte	gi|124430725|ref|NP_001037590.1| sex-specific storage-protein 2 precursor [Bombyx mori]	0	100	NA	NA	NA	NA	NA	NA	NA	NA	NA	NA	NA	NA	-3.84947	2.9592	2.10902e-05	0.000550747	7.127	8.709	6.792	0	0.161	0.071	2585.53	2757.93	2558.97	1.903	2.674	1.501	0.44	0.937	0.518	0	0.077	0	4365.64	4351.27	4391.12	2.2	1.95	2.731
BGIBMGA009030	turquoise	Toxin_midgut	gi|390370154|ref|XP_003731780.1| PREDICTED: lysine-specific demethylase 2A-like [Strongylocentrotus purpuratus]	2e-08	34.23	NA	NA	NA	NA	2.44105	2.67061	5.99324e-05	0.00164156	NA	NA	NA	NA	NA	NA	NA	NA	1.537	0.405	0.206	0.403	0	0.145	0	0	0.426	2.059	2.956	1.901	3.356	1.506	1.711	0	0	0	0.601	0.457	1.827	14.263	13.21	9.674
BGIBMGA009034	cyan	Toxin_midgut	gi|66518456|ref|XP_393726.2| PREDICTED: uncharacterized protein LOC410244 isoform 2 [Apis mellifera]	9e-61	72.13	NA	NA	NA	NA	3.2789	1.89561	0.00342419	0.0458348	NA	NA	NA	NA	NA	NA	NA	NA	1.66	0.316	1.635	16.947	18.991	12.537	2.485	2.354	2.311	1.534	0.537	0	0.79	1.106	2.099	13.602	15.114	15.414	3.931	3.112	4.743	7.184	8.203	0.847
BGIBMGA006275	blue	CK_fatbody	gi|512894932|ref|XP_004923550.1| PREDICTED: 28S ribosomal protein S24, mitochondrial-like [Bombyx mori]	4e-81	100	-1.15225	4.72826	3.29545e-05	0.000559423	NA	NA	NA	NA	NA	NA	NA	NA	NA	NA	NA	NA	19.371	24.46	26.241	61.036	63.812	66.589	37.698	40.122	30.216	59.13	61.591	50.26	22.666	19.246	25.892	70.564	62.09	63.921	17.369	18.355	14.297	29.526	29.846	40.014
BGIBMGA009047	yellow	Toxin_fatbody	gi|512898569|ref|XP_004924430.1| PREDICTED: serine protease inhibitor dipetalogastin-like [Bombyx mori]	1e-137	100	7.16268	7.36927	6.03392e-135	4.20645e-132	NA	NA	NA	NA	NA	NA	NA	NA	NA	NA	NA	NA	3.807	0.065	1.165	0	0	0	4.307	3.243	0.062	1.878	0.016	5.469	0.034	1.523	0.054	1.627	0	0.633	405.955	403.968	397.279	2.692	9.272	5.25
BGIBMGA006326	greenyellow	CK_midgut	gi|512895085|ref|XP_004923588.1| PREDICTED: ankyrin repeat domain-containing protein 17-like [Bombyx mori]	4e-56	88.24	NA	NA	NA	NA	-1.11842	3.98567	0.000860925	0.0155409	NA	NA	NA	NA	NA	NA	NA	NA	27.036	33.313	29.419	21.573	13.829	13.201	47.53	49.952	41.281	22.189	33.766	30.564	34.173	42.143	29.468	14.4	13.394	12.572	42.914	41.114	62.972	17.995	12.261	9.011
BGIBMGA009053	brown	Toxin_hemocyte,Toxin_midgut	gi|512898538|ref|XP_004924423.1| PREDICTED: SH2 domain-containing protein 4B-like [Bombyx mori]	0	100	NA	NA	NA	NA	1.10237	5.24875	2.61128e-08	1.74276e-06	NA	NA	NA	NA	2.68263	7.46269	1.6188e-49	1.48426e-46	35.207	37.765	39.298	4.202	6.324	7.761	18.671	15.803	20.102	35.469	37.271	36.079	249.104	253.925	240.809	5.852	5.633	5.261	18.031	19.703	17.635	81.889	76.196	74.322
BGIBMGA006412	greenyellow	CK_midgut	gi|512924261|ref|XP_004930554.1| PREDICTED: ATP synthase lipid-binding protein, mitochondrial-like [Bombyx mori]	6e-60	100	NA	NA	NA	NA	-1.21651	4.62035	1.42706e-05	0.00049179	NA	NA	NA	NA	NA	NA	NA	NA	13.055	20.255	14.615	11.12	12.263	11.485	30.392	52.412	56.879	36.554	46.733	57.73	16.569	9.14	13.785	14.33	13.043	8.14	35.873	27.896	22.787	11.007	21.458	26.434
BGIBMGA006674	pink	CK_fatbody	no hints			-1.79675	5.18991	7.54668e-13	5.2262e-11	NA	NA	NA	NA	NA	NA	NA	NA	NA	NA	NA	NA	2.77	2.42	4.173	0.761	0.237	0.167	54.708	60.94	54.93	3.025	4.029	2.646	2.107	3.757	2.261	0.112	0.303	0.378	18.222	18.033	12.33	2.856	3.592	2.596
BGIBMGA009088	tan	Toxin_midgut	gi|512898417|ref|XP_004924395.1| PREDICTED: uncharacterized protein LOC101737434 isoform X2 [Bombyx mori]	1e-92	100	NA	NA	NA	NA	1.65374	7.58736	3.24681e-28	2.50142e-25	NA	NA	NA	NA	NA	NA	NA	NA	0.766	0	0.515	0	0.148	0	44.57	111.654	119.081	137.644	137.132	157.365	0.492	0	0	0	0	0	50.484	52.552	47.075	441.231	444.276	455.691
BGIBMGA006781	blue	CK_fatbody	gi|512923855|ref|XP_004930454.1| PREDICTED: spatacsin-like [Bombyx mori]	1e-39	100	-2.52479	2.57962	0.00473333	0.0374122	NA	NA	NA	NA	NA	NA	NA	NA	NA	NA	NA	NA	0	0.962	16.489	1.205	0.697	0.606	9.673	7.93	1.812	7.085	0.651	2.79	1.069	2.574	0.467	0.6	0.33	0.255	1.319	2.038	0.427	0	11.706	0.687
BGIBMGA007144	greenyellow	Toxin_fatbody	gi|195963353|ref|NP_001124349.1| 3-hydroxyisobutyrate dehydrogenase [Bombyx mori] gi|189345326|gb|ACD92999.1| 3-hydroxyisobutyrate dehydrogenase [Bombyx mori]	0	99.38	1.01774	10.5378	1.62041e-15	1.34481e-13	NA	NA	NA	NA	NA	NA	NA	NA	NA	NA	NA	NA	233.847	249.703	238.525	81.331	87.303	88.897	1174.45	1009.55	1159.37	1317.83	1341.27	1333.47	248.015	241.045	255.097	72.578	72.547	73.942	2281.59	2351.4	2363.88	1550.77	1466.74	1366.24
BGIBMGA007263	pink	CK_fatbody	gi|512905182|ref|XP_004925880.1| PREDICTED: ribosomal L1 domain-containing protein CG13096-like [Bombyx mori]	0	97	-1.0971	7.40517	3.72196e-11	2.07024e-09	NA	NA	NA	NA	NA	NA	NA	NA	NA	NA	NA	NA	91.044	88.576	94.579	206.71	209.953	212.938	248.019	274.084	235.321	170.26	176.006	166.487	107.95	90.819	101.73	236.911	226.089	234.924	120.411	121.766	126.406	90.29	89.246	102.338
BGIBMGA009126	brown	Toxin_hemocyte	gi|512905881|ref|XP_004926056.1| PREDICTED: oxidative stress-induced growth inhibitor 1-like [Bombyx mori]	7e-58	98.94	NA	NA	NA	NA	NA	NA	NA	NA	NA	NA	NA	NA	1.16158	7.04827	1.54567e-06	5.14309e-05	45.244	97.785	47.553	15.73	16.584	14.959	29.64	34.928	64.409	50.271	67.587	32.061	147.315	150.077	143.472	17.419	18.711	10.883	35.973	39.391	35.063	39.544	33.967	29.717
BGIBMGA009135	brown	CK_fatbody	gi|512905780|ref|XP_004926030.1| PREDICTED: S-adenosylmethionine mitochondrial carrier protein homolog [Bombyx mori]	5e-161	87.55	-1.48706	3.99891	0.000168846	0.00227529	NA	NA	NA	NA	NA	NA	NA	NA	NA	NA	NA	NA	3.281	4.025	3.849	4.62	4.454	3.803	21.106	21.388	21.434	16.345	19.315	14.745	4.605	5.21	3.457	3.86	2.696	4.228	7.83	6.326	10.126	4.866	10.783	7.035
BGIBMGA009181	tan	CK_fatbody	gi|512911126|ref|XP_004927338.1| PREDICTED: DNA ligase 1-like [Bombyx mori]	0	95.94	-1.11099	5.3698	4.8803e-07	1.31529e-05	NA	NA	NA	NA	NA	NA	NA	NA	NA	NA	NA	NA	50.226	49.589	54.737	43.794	47.604	45.944	60.819	54.981	59.282	40.088	40.188	41.494	55.376	52.552	52.866	49.466	44.095	43.304	26.86	28.253	29.116	31.88	28.352	26.192
BGIBMGA009182	turquoise	Toxin_hemocyte	gi|512911080|ref|XP_004927327.1| PREDICTED: NADH dehydrogenase [ubiquinone] 1 beta subcomplex subunit 3-like isoform X1 [Bombyx mori] gi|512911084|ref|XP_004927328.1| PREDICTED: NADH dehydrogenase [ubiquinone] 1 beta subcomplex subunit 3-like isoform X2 [Bombyx mori] gi|512911088|ref|XP_004927329.1| PREDICTED: NADH dehydrogenase [ubiquinone] 1 beta subcomplex subunit 3-like isoform X3 [Bombyx mor…	3e-66	100	NA	NA	NA	NA	NA	NA	NA	NA	NA	NA	NA	NA	3.96224	4.26062	0.00242414	0.0336767	1.249	1.739	1.098	0.667	0.573	1.32	5.122	4.549	3.191	4.254	3.136	5.101	0.337	76.875	1.002	1.952	1.139	0.773	2.653	2.53	3.192	2.027	3.52	3.308
BGIBMGA007431	greenyellow	CK_fatbody,CK_midgut	gi|512896694|ref|XP_004923972.1| PREDICTED: aladin-like [Bombyx mori]	0	99.54	-1.45216	6.30177	9.71198e-13	6.53713e-11	-1.05117	4.8716	6.70817e-06	0.000257382	NA	NA	NA	NA	NA	NA	NA	NA	30.585	33.328	37.949	196.63	197.808	199.154	123.539	123.524	119.766	54.967	56.745	56.171	29.871	30.977	30.545	172.714	182.023	188.893	47.679	44.176	45.428	23.257	26.127	28.763
BGIBMGA009199	salmon	Toxin_fatbody	gi|512911768|ref|XP_004927493.1| PREDICTED: organic cation transporter protein-like [Bombyx mori]	0	100	1.16647	4.40787	9.55626e-05	0.00141343	NA	NA	NA	NA	NA	NA	NA	NA	NA	NA	NA	NA	0	0.019	0	0.064	0.13	0.132	13.181	15.151	13.258	125.518	120.393	118.437	0	0	0	0	0	0.119	34.064	31.804	30.75	148.453	150.911	138.414
BGIBMGA007494	pink	Toxin_fatbody	gi|512899603|ref|XP_004924686.1| PREDICTED: multidrug resistance protein 1A-like isoform X1 [Bombyx mori] gi|512899606|ref|XP_004924687.1| PREDICTED: multidrug resistance protein 1A-like isoform X2 [Bombyx mori]	0	100	1.49299	3.29468	0.00146088	0.0140279	NA	NA	NA	NA	NA	NA	NA	NA	NA	NA	NA	NA	0	0.021	0	0.077	0.221	0.04	4.105	4.74	5.598	333.703	321.049	309.944	0	0.03	0.072	0	0.122	0.075	14.212	13.93	13.845	354.737	348.05	366.774
BGIBMGA009210	turquoise	CK_midgut	no hints			NA	NA	NA	NA	-6.46735	2.91029	0.000878294	0.0157008	NA	NA	NA	NA	NA	NA	NA	NA	24.524	0.62	21.927	5.001	6.208	4.846	0	0.618	0.153	0	46.816	0.595	28.185	27.54	0	6.532	6.066	4.433	0.225	0	0.85	0	0	0.341
BGIBMGA009229	turquoise	Toxin_fatbody	gi|512891322|ref|XP_004922663.1| PREDICTED: cathepsin O-like [Bombyx mori]	4e-128	100	4.30716	4.59655	1.41606e-31	2.35044e-29	NA	NA	NA	NA	NA	NA	NA	NA	NA	NA	NA	NA	9.188	0.253	1.177	7.39	5.162	0.7	1.642	3.017	3.542	3.822	0.568	0	0.257	0.277	0	6.741	5.617	0.2	52.752	57.189	56.338	2.299	2.929	0.7
BGIBMGA009250	yellow	Toxin_fatbody	gi|512891125|ref|XP_004922630.1| PREDICTED: cAMP-responsive element-binding protein-like 2-like [Bombyx mori]	8e-80	97.64	1.26548	5.02829	2.02541e-06	4.78912e-05	NA	NA	NA	NA	NA	NA	NA	NA	NA	NA	NA	NA	27.886	53.473	86.504	66.495	35.097	37.238	23.536	14.289	26.483	39.698	70.434	39.616	64.214	76.435	79.808	48.131	44.784	50.054	41.075	71.156	48.206	81.629	63.912	118.301
BGIBMGA007627	blue	CK_midgut	gi|512916631|ref|XP_004928686.1| PREDICTED: uncharacterized protein LOC101736984 isoform X2 [Bombyx mori]	1e-46	100	NA	NA	NA	NA	-2.18999	2.82596	0.000326342	0.0069189	NA	NA	NA	NA	NA	NA	NA	NA	826.952	882.953	908.036	0.532	0.432	0.154	317.113	286.819	272.679	12.766	11.794	12.69	532.59	380.811	468.526	0.311	3.036	0.255	187.71	192.475	174.677	4.092	1.468	2.7
BGIBMGA009269	purple	Toxin_fatbody	gi|512891508|ref|XP_004922701.1| PREDICTED: protein kibra-like [Bombyx mori]	0	96.67	1.10272	4.15137	0.00089162	0.00924968	NA	NA	NA	NA	NA	NA	NA	NA	NA	NA	NA	NA	23.471	17.819	17.132	2.229	2.215	2.322	11.192	12.428	12.347	12.139	16.119	12.805	32.665	32.291	32.766	2.296	2.881	2.527	28.665	25.119	23.641	26.314	24.409	26.235
BGIBMGA007656	pink	CK_midgut	gi|222137596|gb|ACM45325.1| rbp1-like RNA-binding protein PB [Bombyx mori]	6e-92	86.79	NA	NA	NA	NA	-1.36837	5.71924	1.46926e-10	1.54714e-08	NA	NA	NA	NA	NA	NA	NA	NA	68.134	58.004	62.771	34.553	33.262	38.426	114.82	102.109	113.415	111.357	113.948	106.706	64.203	69.81	62.046	35.588	34.859	34.585	87.057	89.539	85.078	42.002	42.378	41.16
BGIBMGA009298	yellow	Toxin_fatbody	gi|389610121|dbj|BAM18672.1| inositol 1 [Papilio xuthus]	0	81.93	1.40025	5.75253	1.31474e-11	7.94693e-10	NA	NA	NA	NA	NA	NA	NA	NA	NA	NA	NA	NA	44.179	44.452	44.417	115.444	112.209	116.986	33.211	30.606	36.978	34.405	33.882	30.81	87.34	97.391	84.751	115.825	120.775	125.906	94.821	90.107	89.865	41.955	36.949	37.831
BGIBMGA009303	brown	Toxin_hemocyte	gi|512937886|ref|XP_004933874.1| PREDICTED: synaptotagmin-C-like [Bombyx mori]	3e-65	98	NA	NA	NA	NA	NA	NA	NA	NA	NA	NA	NA	NA	1.19678	9.12379	4.0074e-19	7.34868e-17	263.89	290.174	261.883	63.128	68.574	77.181	11.173	9.573	8.924	0	0	1.524	621.54	652.605	630.496	62.533	68.079	76.955	9.418	7.661	8.967	0	0.879	0
BGIBMGA009312	brown	Toxin_fatbody	gi|321400080|ref|NP_001189461.1| growth arrest-specific protein 2 [Bombyx mori]	0	100	1.57569	2.9493	0.00524435	0.0407733	NA	NA	NA	NA	NA	NA	NA	NA	NA	NA	NA	NA	0.355	0.203	0.146	1.129	1.757	0.808	3.192	2.057	4.217	1.777	1.805	2.459	0.521	0.367	0	0.93	1.484	1.195	11.758	10.176	10.126	2.253	1.364	1.347
BGIBMGA009342	tan	CK_fatbody	gi|512895955|ref|XP_004923797.1| PREDICTED: LOW QUALITY PROTEIN: GPI mannosyltransferase 3-like [Bombyx mori]	0	92.69	-1.39951	7.21072	1.41756e-16	1.3118e-14	NA	NA	NA	NA	NA	NA	NA	NA	NA	NA	NA	NA	85.841	92.454	96.471	190.107	200.578	195.235	226.123	230.196	242.193	101.375	98.794	93.212	110.986	107.042	111.835	191.376	191.468	204.685	87.817	91.409	94.747	53.981	58.396	55.554
BGIBMGA009374	green	Toxin_midgut	gi|512896054|ref|XP_004923819.1| PREDICTED: protein Kr-h2-like [Bombyx mori]	1e-77	99.15	NA	NA	NA	NA	4.30691	5.25307	0.000695767	0.0131227	NA	NA	NA	NA	NA	NA	NA	NA	27.608	1.524	3.331	0.989	0.559	1.599	2.999	4.003	1.656	4.036	5.608	5.46	2.121	1.494	1.269	1.718	2.405	0	4.961	5.163	4.857	0.47	310.776	1.952
BGIBMGA009376	yellow	CK_hemocyte,Toxin_fatbody	gi|512896180|ref|XP_004923849.1| PREDICTED: facilitated trehalose transporter Tret1-2 homolog [Bombyx mori]	0	96.74	1.52786	3.61883	0.00017737	0.00236878	NA	NA	NA	NA	NA	NA	NA	NA	-1.68453	4.02549	4.77869e-05	0.00115641	21.139	14.731	14.778	1.267	0.63	0.374	6.549	6.643	5.621	11.458	13.112	11.508	5.04	5.842	4.572	0.434	0.395	0.24	21.572	16.717	18.583	10.556	7.651	9.439
BGIBMGA009393	salmon	Toxin_cell	gi|119850|sp|P21828.1|FIBL_BOMMO RecName: Full=Fibroin light chain; Short=Fib-L; AltName: Full=L-fibroin; Contains: RecName: Full=Fibroin light chain, short form; Flags: Precursor gi|5921|emb|CAA35180.1| silk fibroin light chain [Bombyx mori]	0	100	NA	NA	NA	NA	NA	NA	NA	NA	5.02458	7.69533	2.77139e-05	0.0104337	NA	NA	NA	NA	3.943	4.335	3.904	1.776	6.923	17.354	11556	12446.4	12996.2	181.951	7.14	8.181	2.896	4.566	9.945	26.055	833.4	3.012	21213	21199.5	20873.6	13.369	10.271	11.021
BGIBMGA009395	magenta	Toxin_hemocyte	gi|512902634|ref|XP_004925423.1| PREDICTED: WD repeat-containing protein 18-like [Bombyx mori]	0	100	NA	NA	NA	NA	NA	NA	NA	NA	NA	NA	NA	NA	7.49726	4.22189	5.77147e-05	0.00135302	0	0	0	0	0	0	0	0	0	0	0	0	78.136	0	0	0	0	0	0	0	0	0	0	0
BGIBMGA009407	magenta	CK_hemocyte	gi|357609199|gb|EHJ66342.1| putative inscuteable [Danaus plexippus]	0	71.53	NA	NA	NA	NA	NA	NA	NA	NA	NA	NA	NA	NA	-1.42824	4.54695	0.000175889	0.0035229	32.791	28.378	13.527	2.532	3.113	2.751	9.469	9.451	10.549	13.452	13.485	12.475	14.369	5.762	7.551	3.283	3.473	3.324	8.432	9.434	9.239	25.093	20.283	21.677
BGIBMGA009443	brown	Toxin_fatbody	gi|512892210|ref|XP_004922875.1| PREDICTED: proteoglycan 4-like [Bombyx mori]	0	99.72	1.76982	2.80061	0.00409187	0.0330159	NA	NA	NA	NA	NA	NA	NA	NA	NA	NA	NA	NA	1.111	0.725	1.513	0.089	0.055	0.048	2.599	2.306	2.727	1.377	1.942	1.62	2.269	1.264	1.582	0.013	0.075	0.046	10.958	9.447	8.187	1.119	1.07	1.005
BGIBMGA009476	red	Toxin_midgut	gi|512891971|ref|XP_004922815.1| PREDICTED: carboxypeptidase A2-like [Bombyx mori]	0	100	NA	NA	NA	NA	1.03243	7.72248	2.24604e-13	3.73434e-11	NA	NA	NA	NA	NA	NA	NA	NA	0	0	0	0.082	0	0	0.271	0.365	0.182	218.762	213.126	211.76	0	0	0	0.116	0	0	1.973	1.279	0.917	423.101	418.798	455.26
BGIBMGA007678	pink	CK_midgut	gi|512916372|ref|XP_004928625.1| PREDICTED: probable chitinase 3-like [Bombyx mori]	0	95.86	NA	NA	NA	NA	-1.19136	4.46583	1.21409e-05	0.000423012	NA	NA	NA	NA	NA	NA	NA	NA	0	0	0	0.091	0.115	0	66.18	74.581	67.336	43.951	41.473	43.674	0	0	0	0.21	0.179	0	39.7	48.927	44.711	16.904	20.445	16.195
BGIBMGA009490	grey	CK_hemocyte,CK_fatbody	gi|512892134|ref|XP_004922855.1| PREDICTED: calpain-D-like [Bombyx mori]	7e-45	100	-5.6081	2.6212	0.00476027	0.0375684	NA	NA	NA	NA	NA	NA	NA	NA	-6.64551	3.60741	1.72583e-06	5.65142e-05	0	20.399	20.396	17.68	0	0	0	0	22.598	0	0	0	0	0	0	17.185	0	0	0	0	0	0	0	0
BGIBMGA009516	purple	Toxin_fatbody	no hints			1.79553	4.49113	1.02322e-09	4.79812e-08	NA	NA	NA	NA	NA	NA	NA	NA	NA	NA	NA	NA	0.942	1.486	1.095	3.159	1.341	3.419	9.647	8.468	14.458	3.532	2.582	2.606	2.204	1.235	3.553	4.28	3.346	3.492	37.783	47.376	34.03	6.361	7.713	7.094
BGIBMGA009535	turquoise	CK_midgut	gi|512910985|ref|XP_004927305.1| PREDICTED: zinc finger CCCH domain-containing protein 11A-like, partial [Bombyx mori]	0	100	NA	NA	NA	NA	-1.00366	4.78584	2.07615e-05	0.000688382	NA	NA	NA	NA	NA	NA	NA	NA	13.774	15.765	16.701	15.173	17.429	18.822	51.035	54.936	52.277	49.442	51.574	55.742	19.328	20.288	16.926	19.69	16.691	19.952	37.488	31.309	30.216	22.772	29.57	24.148
BGIBMGA009572	brown	CK_fatbody	gi|358332592|dbj|GAA31514.2| protein translocase subunit secA, partial [Clonorchis sinensis]	0	34.91	-1.31337	8.54833	2.36887e-18	2.35917e-16	NA	NA	NA	NA	NA	NA	NA	NA	NA	NA	NA	NA	500.433	483.83	517.991	366.976	389.852	391.536	569.296	650.176	556.16	753.243	727.752	713.344	609.875	616.781	626.436	431.833	397.919	390.393	251.21	240.729	246.813	419.24	403.576	457.47
BGIBMGA009608	turquoise	Toxin_fatbody	gi|512907036|ref|XP_004926343.1| PREDICTED: phosphatidate phosphatase PPAPDC1B-like [Bombyx mori]	0	100	1.55705	4.53803	8.94662e-08	2.80247e-06	NA	NA	NA	NA	NA	NA	NA	NA	NA	NA	NA	NA	6.765	18.138	10.685	4.597	4.217	5.982	13.964	13.118	10.561	57.501	69.32	66.065	6.474	9.454	14.374	3.583	4.941	3.498	45.514	27.343	45.064	66.979	57.713	68.314
BGIBMGA009621	brown	CK_hemocyte	gi|525343705|ref|NP_001266364.1| low molecular mass 30 kDa lipoprotein 21G1-like [Bombyx mori] gi|379046520|gb|AFC87821.1| 30K protein 23 [Bombyx mori]	0	100	NA	NA	NA	NA	NA	NA	NA	NA	NA	NA	NA	NA	-2.30807	4.45145	6.70081e-10	4.221e-08	23.322	22.261	29.876	0.146	0	0	0	3.132	0	0	0	0	8.316	5.003	1.817	0.012	0	0.337	2.158	2.883	3.701	0	0	0
BGIBMGA009668	yellow	CK_fatbody	gi|357601873|gb|EHJ63175.1| putative hepatoma-derived GF [Danaus plexippus]	0	71.63	-1.07932	6.06972	3.82011e-07	1.05401e-05	NA	NA	NA	NA	NA	NA	NA	NA	NA	NA	NA	NA	96.128	91.377	100.133	146.681	150.424	140.941	90.249	103.06	96.202	106.616	101.057	91.595	101.477	121.096	117.871	155.544	153.687	155.858	45.373	45.247	49.537	59.801	53.377	57.036
BGIBMGA007756	greenyellow	CK_fatbody	gi|512915784|ref|XP_004928474.1| PREDICTED: RE1-silencing transcription factor-like [Bombyx mori]	0	90.55	-1.06714	4.35476	0.00128307	0.01261	NA	NA	NA	NA	NA	NA	NA	NA	NA	NA	NA	NA	37.531	34.578	35.887	30.054	29.434	31.03	27.692	26.704	24.569	25.722	22.393	20.475	37.116	35.111	34.912	30.426	32.521	30.978	11.98	12.283	15.497	15.222	13.265	16.42
BGIBMGA009699	brown	CK_fatbody	gi|512935385|ref|XP_004933262.1| PREDICTED: T-complex protein 1 subunit epsilon-like [Bombyx mori]	0	100	-1.22788	8.15787	3.45956e-17	3.31896e-15	NA	NA	NA	NA	NA	NA	NA	NA	NA	NA	NA	NA	199.211	235.913	222.467	405.223	378.343	379.806	462.987	420.852	443.199	487.552	490.639	502.797	284.217	312.542	296.772	393.422	414.332	436.887	191.36	202.785	191.587	276.073	274.574	272.953
BGIBMGA009701	turquoise	CK_cell	gi|512935373|ref|XP_004933259.1| PREDICTED: cytochrome c oxidase subunit 7C, mitochondrial-like [Bombyx mori]	2e-42	100	NA	NA	NA	NA	NA	NA	NA	NA	-5.68822	6.24118	7.93125e-06	0.00343383	NA	NA	NA	NA	212.611	273.643	0.629	2.22	290.922	1.691	323.882	6.765	3.752	98.102	2.024	3.753	0.966	224.615	1.022	2.769	1.549	1.431	2.738	2.57	479.738	126.822	150.903	0.649
BGIBMGA009755	brown	CK_cell,Toxin_midgut	gi|512935787|ref|XP_004933359.1| PREDICTED: protein lunapark-B-like [Bombyx mori]	2e-39	97.06	NA	NA	NA	NA	4.04095	3.20534	2.11762e-05	0.000694419	-8.78032	5.02747	1.25861e-48	5.44915e-45	NA	NA	NA	NA	1.545	0.161	13.288	42.362	41.95	39.153	49.181	43.648	49.941	0.38	1.935	1.441	28.115	0.581	0	0	0.299	0	33.569	23.598	18.825	42.31	29.598	0
BGIBMGA009763	magenta	CK_midgut	gi|512935530|ref|XP_004933296.1| PREDICTED: translation machinery-associated protein 7 homolog [Bombyx mori]	5e-33	100	NA	NA	NA	NA	-4.76868	4.64533	0.000701559	0.0131657	NA	NA	NA	NA	NA	NA	NA	NA	1.224	0.967	1.535	0.396	0.805	0.67	4.079	2.823	3.634	1.437	189.287	1.069	2.62	1.081	0.386	1.164	1.004	1.409	5.629	2.256	4.264	3.285	2.455	0.624
BGIBMGA007864	pink	CK_midgut	gi|512916211|ref|XP_004928576.1| PREDICTED: zinc finger protein GLI1-like [Bombyx mori]	0	100	NA	NA	NA	NA	-1.84484	6.05261	1.9413e-19	6.13258e-17	NA	NA	NA	NA	NA	NA	NA	NA	47.667	49.068	47.637	0.789	0.598	0.603	43.79	42.614	36.597	143.929	159.897	152.659	29.156	24.975	27.673	0.433	0.587	0.551	40.714	39.675	48.116	37.592	42.212	44.894
BGIBMGA009772	turquoise	Toxin_fatbody	no hints			1.54484	3.32222	0.000948064	0.00971311	NA	NA	NA	NA	NA	NA	NA	NA	NA	NA	NA	NA	0.169	2.797	3.675	9.784	0	0	5.48	5.394	3.651	9.207	11.413	9.345	2.811	3.009	2.615	0.852	0.491	0.42	16.497	11.906	13.891	7.943	5.444	1.512
BGIBMGA008020	blue	Toxin_fatbody	gi|512892297|ref|XP_004922897.1| PREDICTED: ras suppressor protein 1-like isoform X1 [Bombyx mori] gi|512892301|ref|XP_004922898.1| PREDICTED: ras suppressor protein 1-like isoform X2 [Bombyx mori] gi|512892309|ref|XP_004922900.1| PREDICTED: ras suppressor protein 1-like isoform X4 [Bombyx mori]	0	100	1.11696	6.11971	5.86091e-08	1.90927e-06	NA	NA	NA	NA	NA	NA	NA	NA	NA	NA	NA	NA	295.456	169.308	200.787	33.987	28.458	32.033	43.201	61.226	44.448	56.965	44.685	58.03	170.338	170.914	178.517	34.144	31.301	33.811	105.709	111.818	117.609	57.494	67.184	70.52
BGIBMGA009820	turquoise	Toxin_hemocyte	gi|343466332|gb|AEM43038.1| methuselah-like protein 10 [Bombyx mori]	1e-100	100	NA	NA	NA	NA	NA	NA	NA	NA	NA	NA	NA	NA	9.16675	5.72731	6.63058e-07	2.36864e-05	0	0	0	47.408	49.167	46.532	0	0	11.083	0	0	0	0	0	248.936	45.589	46.605	43.37	0	0	0	0	0	0
BGIBMGA009851	turquoise	CK_fatbody	gi|512895378|ref|XP_004923658.1| PREDICTED: valine--tRNA ligase-like isoform X1 [Bombyx mori]	0	98.9	-1.10742	5.89003	2.02591e-07	5.91758e-06	NA	NA	NA	NA	NA	NA	NA	NA	NA	NA	NA	NA	47.543	48.826	46.468	86.932	87.823	89.191	90.006	78.252	87.072	100.151	106.051	107.521	55.121	57.687	59.002	86.701	89.134	89.25	40.537	43.854	36.144	62.89	62.023	60.32
BGIBMGA009874	turquoise	CK_midgut	gi|306518664|ref|NP_001182393.1| carboxyl/cholinesterase 7 precursor [Bombyx mori] gi|301069200|dbj|BAJ11979.1| carboxyl/cholinesterase 7 [Bombyx mori]	0	98.75	NA	NA	NA	NA	-1.07159	4.62696	2.8757e-05	0.000902419	NA	NA	NA	NA	NA	NA	NA	NA	0.871	0.613	0.911	5.398	6.325	5.526	161.24	145.154	163.664	45.623	46.782	46.836	1.096	0.366	1.227	6.704	8.041	7.516	125.008	129.219	111.42	20.565	19.96	25.451
BGIBMGA009877	turquoise	CK_fatbody	gi|512895326|ref|XP_004923645.1| PREDICTED: SWI/SNF-related matrix-associated actin-dependent regulator of chromatin subfamily A containing DEAD/H box 1 homolog [Bombyx mori]	0	98.81	-1.19729	5.57551	6.77736e-08	2.1607e-06	NA	NA	NA	NA	NA	NA	NA	NA	NA	NA	NA	NA	35.279	35.45	33.545	71.833	79.763	72.203	72.69	65.954	67.693	39.787	44.325	48.221	34.031	32.91	31.33	75.074	76.274	71.339	26.599	33.453	32.587	28.187	26.193	30.136
BGIBMGA009882	magenta	CK_hemocyte,CK_midgut	gi|512895350|ref|XP_004923651.1| PREDICTED: nitrogen permease regulator 2-like protein-like [Bombyx mori]	1e-151	99.52	NA	NA	NA	NA	-1.02556	4.68562	4.21398e-05	0.00122128	NA	NA	NA	NA	-1.48152	5.57898	5.23394e-11	4.07458e-09	56.707	55.244	49.001	3.619	4.488	3.626	109.949	91.953	97.948	41.392	52.167	49.873	20.291	19.435	18.807	4.969	6.502	6.02	116.18	134.341	108.743	18.935	25.715	25.214
BGIBMGA008023	blue	Toxin_fatbody	gi|332020498|gb|EGI60913.1| Putative protein disulfide-isomerase A4 [Acromyrmex echinatior]	0	53.76	1.90594	4.04723	6.30495e-08	2.0412e-06	NA	NA	NA	NA	NA	NA	NA	NA	NA	NA	NA	NA	0.09	0	0.035	0.078	0.038	0.021	6.932	7.438	7.79	87.621	95.953	87.849	0.079	0	0.04	0.027	0.028	0.038	28.54	30.299	27.186	113.314	114.866	120.95
BGIBMGA009941	turquoise	CK_fatbody	gi|512910249|ref|XP_004927122.1| PREDICTED: ubiquitin carboxyl-terminal hydrolase 5-like [Bombyx mori]	0	100	-1.00767	6.65135	3.66233e-08	1.24746e-06	NA	NA	NA	NA	NA	NA	NA	NA	NA	NA	NA	NA	75.487	83.107	84.169	137.946	141.17	147.483	149.78	138.928	145.224	106.809	114.913	109.083	93.893	101.403	100.206	141.467	150.749	151.761	74.331	71.475	77.996	75.671	73.573	76.052
BGIBMGA008082	pink	CK_midgut	gi|512892458|ref|XP_004922936.1| PREDICTED: c-5 sterol desaturase erg32-like [Bombyx mori]	0	100	NA	NA	NA	NA	-1.20212	7.4963	2.98835e-16	6.29347e-14	NA	NA	NA	NA	NA	NA	NA	NA	0.085	0	0	0.37	0.826	0.463	0.539	0.375	0.259	382.212	375.06	387.888	0.077	0	0.006	0.575	0.564	0.399	0.456	0.745	0.482	157.582	159.263	171.921
BGIBMGA009956	yellow	Toxin_cell	gi|114052002|ref|NP_001040446.1| U2 small nuclear ribonucleoprotein A' [Bombyx mori] gi|95102924|gb|ABF51403.1| U2 small nuclear ribonucleoprotein A' [Bombyx mori]	1e-28	96.43	NA	NA	NA	NA	NA	NA	NA	NA	8.94135	5.11244	4.72829e-07	0.000314941	NA	NA	NA	NA	0	0	0	0	0	0	0	0	0	0	0	0	0	0	0	0	143.792	0	0	0	0	0	0	0
BGIBMGA009958	turquoise	Toxin_fatbody	gi|512907484|ref|XP_004926454.1| PREDICTED: uncharacterized protein LOC101740638 isoform X1 [Bombyx mori] gi|512907488|ref|XP_004926455.1| PREDICTED: uncharacterized protein LOC101740638 isoform X2 [Bombyx mori]	7e-76	100	1.13109	4.16663	0.000638664	0.00700054	NA	NA	NA	NA	NA	NA	NA	NA	NA	NA	NA	NA	10.918	8.308	8.636	12.261	12.421	12.485	11.212	12.975	10.807	99.087	126.191	122.937	13.751	13.31	12.922	12.509	14.305	14.409	32.172	23.53	24.75	132.538	141.692	149.441
BGIBMGA009966	yellow	Toxin_hemocyte	gi|512907441|ref|XP_004926442.1| PREDICTED: d-2-hydroxyglutarate dehydrogenase, mitochondrial-like isoform X1 [Bombyx mori] gi|512907443|ref|XP_004926443.1| PREDICTED: d-2-hydroxyglutarate dehydrogenase, mitochondrial-like isoform X2 [Bombyx mori]	0	99.8	NA	NA	NA	NA	NA	NA	NA	NA	NA	NA	NA	NA	1.65013	7.0435	5.39559e-20	1.03545e-17	44.169	52.519	53.101	21.237	22.127	22.647	39.873	40.732	42.153	150.769	146.72	137.635	168.633	155.138	160.553	26.004	25.557	22.452	50.455	55.947	44.858	108.073	107.542	117.171
BGIBMGA008227	blue	Toxin_fatbody	gi|512909077|ref|XP_004926834.1| PREDICTED: ninjurin-1-like [Bombyx mori]	2e-85	99.22	1.40527	4.20058	1.30059e-05	0.000251856	NA	NA	NA	NA	NA	NA	NA	NA	NA	NA	NA	NA	210.763	209.149	205.515	0.682	0.694	0	10.067	11.144	10.99	8.513	7.296	7.188	328.43	291.6	324.944	0.396	0.187	0.663	31.422	27.773	27.774	4.077	3.617	5.818
BGIBMGA009976	turquoise	Toxin_fatbody	gi|512907402|ref|XP_004926433.1| PREDICTED: PDZ and LIM domain protein 3-like isoform X2 [Bombyx mori]	3e-90	100	2.51519	2.68063	0.0004905	0.00558731	NA	NA	NA	NA	NA	NA	NA	NA	NA	NA	NA	NA	0.64	0.048	0.114	0.417	0.498	1.426	2.063	1.028	0.628	11.182	16.233	10.754	0	0.227	0	1.07	0.985	0.651	10.989	6.039	10.528	9.787	12.529	9.34
BGIBMGA009977	turquoise	Toxin_fatbody	gi|512907406|ref|XP_004926434.1| PREDICTED: PDZ and LIM domain protein 3-like isoform X3 [Bombyx mori]	4e-99	84.07	1.73364	4.57605	1.29928e-09	5.85626e-08	NA	NA	NA	NA	NA	NA	NA	NA	NA	NA	NA	NA	5.383	1.864	2.228	8.313	8.568	6.687	11.135	13.827	10.797	45.183	59.817	63.86	2.121	2.268	2.44	9.752	6.971	10.904	41.471	40.717	41.832	73.372	73.477	65.824
BGIBMGA009978	cyan	CK_fatbody,CK_midgut	gi|512907524|ref|XP_004926464.1| PREDICTED: nucleolin 2-like [Bombyx mori]	0	79.15	-1.76121	8.12833	8.65767e-26	1.16068e-23	-1.42585	6.87261	9.12447e-18	2.40202e-15	NA	NA	NA	NA	NA	NA	NA	NA	166.919	136.566	155.558	143.912	151.833	150.141	447.638	535.14	440.347	261.703	269.54	236.951	192.792	206.02	190.08	173.096	168.677	178.422	149.141	146.125	137.68	95.045	88.73	97.671
BGIBMGA009983	cyan	CK_midgut	gi|512907455|ref|XP_004926446.1| PREDICTED: ribosome biogenesis protein BRX1 homolog [Bombyx mori]	0	100	NA	NA	NA	NA	-1.03098	6.16564	6.96388e-08	4.34189e-06	NA	NA	NA	NA	NA	NA	NA	NA	57.022	58.266	62.977	137.991	136.705	142.469	231.87	281.508	216.942	154.51	135.336	139.296	68.249	79.388	83.094	167.866	147.802	153.973	149.924	135.564	145.426	73.425	59.345	73.874
BGIBMGA010010	turquoise	CK_fatbody	gi|114052076|ref|NP_001040212.1| sericotropin precursor [Bombyx mori]	1e-90	100	-1.4945	3.27857	0.00512452	0.0400801	NA	NA	NA	NA	NA	NA	NA	NA	NA	NA	NA	NA	0	0	0	0.154	0	0	12.253	11.021	11.753	0.916	0.998	1.178	0	0.134	0	0	0	0	4.49	2.395	5.445	0	0.923	1.114
BGIBMGA010076	grey	Toxin_midgut	gi|195963375|ref|NP_001124364.1| tachykinin precursor [Bombyx mori]	8e-175	100	NA	NA	NA	NA	7.59512	3.43246	7.59077e-05	0.00197631	NA	NA	NA	NA	NA	NA	NA	NA	0	0	0.275	2.021	0	0	2.058	0	1.263	0	0	0	0	0	0	0	2.367	1.364	0	0	0	103.516	0	0
BGIBMGA010098	turquoise	CK_midgut	gi|363896160|gb|AEW43164.1| UDP-glycosyltransferase UGT40B1, partial [Bombyx mori]	0	99.65	NA	NA	NA	NA	-1.12797	4.59932	1.59102e-05	0.000546309	NA	NA	NA	NA	NA	NA	NA	NA	0	0	0.098	0.246	0	0.036	0	0.116	0.464	47.835	47.795	43.779	0	0	0.208	0	0.074	0.044	0.007	0.344	0.13	16.951	20.775	23.382
BGIBMGA010111	brown	Toxin_fatbody	gi|512927795|ref|XP_004931424.1| PREDICTED: pollen-specific leucine-rich repeat extensin-like protein 1-like [Bombyx mori]	0	99.86	1.77942	3.45398	9.96543e-05	0.00146155	NA	NA	NA	NA	NA	NA	NA	NA	NA	NA	NA	NA	3.774	2.37	3.021	4.112	5.058	3.707	2.866	5.164	5.029	162.036	178.188	186.668	1.292	0.77	1.968	4.8	5.607	5.016	19.904	16.139	13.913	202.519	206.995	204.426
BGIBMGA010112	turquoise	Toxin_fatbody	gi|512927583|ref|XP_004931371.1| PREDICTED: probable serine/threonine-protein kinase kinX-like isoform X1 [Bombyx mori]	0	100	2.05468	3.3247	4.24282e-05	0.000688931	NA	NA	NA	NA	NA	NA	NA	NA	NA	NA	NA	NA	0.062	0.053	0.118	0.259	0.257	0.037	3.886	4.507	3.615	83.774	71.096	68.921	0	0	0.059	0.127	0.165	0.104	16.331	16.296	15.536	68.498	66.105	75.951
BGIBMGA010116	purple	CK_fatbody	gi|512917337|ref|XP_004928863.1| PREDICTED: alpha-tocopherol transfer protein-like [Bombyx mori]	3e-78	41.04	-1.73672	3.99681	1.96089e-05	0.00035848	NA	NA	NA	NA	NA	NA	NA	NA	NA	NA	NA	NA	0.044	0.313	0.223	40.526	42.707	40.668	19.724	23.738	22.469	0.315	0.34	0	0.624	0.796	1.19	48.52	47.275	46.326	6.385	6.995	5.223	0	0	0.311
BGIBMGA010162	brown	Toxin_fatbody	gi|512927295|ref|XP_004931298.1| PREDICTED: facilitated trehalose transporter Tret1-like [Bombyx mori]	2e-169	100	1.11899	4.12166	0.000764165	0.00815396	NA	NA	NA	NA	NA	NA	NA	NA	NA	NA	NA	NA	0	0.992	1.168	13.95	18.601	16.908	14.424	8.956	11.228	2.064	4.47	2.154	1.595	0.591	0.647	15.073	13.286	12.421	24.191	27.049	25.195	5.251	4.015	3.169
BGIBMGA010168	turquoise	CK_hemocyte	gi|112983896|ref|NP_001037394.1| paralytic peptide binding protein 1 [Bombyx mori] gi|83416494|gb|ABC18268.1| putative paralytic peptide-binding protein [Bombyx mori] gi|379046500|gb|AFC87811.1| 30K protein 13 [Bombyx mori]	0	100	NA	NA	NA	NA	NA	NA	NA	NA	NA	NA	NA	NA	-2.53389	6.72974	2.46242e-28	8.12797e-26	161.673	148.978	116.758	0	0	0.827	0	1.701	1.426	0.761	0.509	0	27.531	18.092	28.791	1.272	0	0	1.678	0	0	0.533	0.471	0.341
BGIBMGA008480	blue	Toxin_fatbody	no hints			1.37124	3.66294	0.000693173	0.00754267	NA	NA	NA	NA	NA	NA	NA	NA	NA	NA	NA	NA	3.208	2.547	2.999	24.037	20.291	23.524	5.505	8.271	6.386	3.278	4.31	3.15	4.59	3.302	4.052	23.879	22.433	23.394	17.257	19.559	19.597	3.226	3.099	5.722
BGIBMGA010192	red	CK_cell	gi|512927649|ref|XP_004931387.1| PREDICTED: putative nuclease HARBI1-like [Bombyx mori]	0	100	NA	NA	NA	NA	NA	NA	NA	NA	-7.04814	3.50051	8.21437e-15	1.42256e-11	NA	NA	NA	NA	0	0	0	11.227	13.765	11.985	0	0	6.157	0	0	0	0	0	0	0	0	0	6.214	5.397	0	0	0	0
BGIBMGA010204	brown	CK_hemocyte	gi|379046510|gb|AFC87816.1| 30K protein 18 [Bombyx mori]	0	95.71	NA	NA	NA	NA	NA	NA	NA	NA	NA	NA	NA	NA	-1.88636	8.93415	1.19753e-36	7.60157e-34	567.573	652.973	629.644	0.01	0.107	0.125	1.338	1.353	1.069	0	0	0.169	173.203	157.902	178.069	0.149	0.062	0.055	0.844	1.263	1.701	0	0.059	0
BGIBMGA008544	pink	Toxin_fatbody	gi|512915219|ref|XP_004928336.1| PREDICTED: tubulin-specific chaperone cofactor E-like protein-like [Bombyx mori]	0	94.44	1.39986	4.8578	2.02927e-08	7.21773e-07	NA	NA	NA	NA	NA	NA	NA	NA	NA	NA	NA	NA	10.295	14.649	10.049	3.401	2.212	1.335	18.365	16.732	17.284	33.767	43.382	38.106	15.685	14.937	14.303	3.057	4.08	3.97	46.666	51.012	48.442	45.516	53.31	52.777
BGIBMGA008950	pink	Toxin_fatbody	gi|557760292|ref|XP_005179867.1| PREDICTED: transmembrane inner ear expressed protein-like [Musca domestica]	2e-27	51.11	1.95958	4.64665	5.66009e-12	3.56552e-10	NA	NA	NA	NA	NA	NA	NA	NA	NA	NA	NA	NA	0.601	1.07	0.716	10.23	9.792	6.322	9.497	14.21	10.023	64.149	48.275	58.296	1.307	0.267	1.354	9.667	7.64	6.262	44.51	51.827	39.928	82.331	58.287	82.937
BGIBMGA009042	pink	CK_fatbody	gi|512898611|ref|XP_004924439.1| PREDICTED: glyoxylate reductase/hydroxypyruvate reductase-like isoform X1 [Bombyx mori] gi|512898615|ref|XP_004924440.1| PREDICTED: glyoxylate reductase/hydroxypyruvate reductase-like isoform X2 [Bombyx mori]	0	88.24	-1.03795	4.17451	0.00364041	0.0300456	NA	NA	NA	NA	NA	NA	NA	NA	NA	NA	NA	NA	3.195	2.134	3.184	4.19	5.492	5.886	25.828	21.49	21.334	33.65	34.074	35.538	3.259	4.144	5.01	6.418	5.193	5.475	10.855	12.89	11.511	26.346	34.098	34.592
BGIBMGA010288	brown	CK_midgut	gi|363896178|gb|AEW43173.1| UDP-glycosyltransferase UGT40P1 [Bombyx mori]	0	100	NA	NA	NA	NA	-2.43057	5.08965	8.0848e-23	3.64855e-20	NA	NA	NA	NA	NA	NA	NA	NA	0	0	0	0.06	0	0	0.161	0.144	0.351	84.032	79.064	79.566	0	0	0	0	0.028	0.039	0.651	0.341	0.713	15.833	15.133	12.424
BGIBMGA010298	tan	CK_hemocyte	gi|512909654|ref|XP_004926974.1| PREDICTED: protein lethal(2)denticleless-like [Bombyx mori]	4e-53	92.22	NA	NA	NA	NA	NA	NA	NA	NA	NA	NA	NA	NA	-1.27453	4.3434	0.000271758	0.00522739	25.156	21.65	13.593	17.748	14.925	13.836	9.701	9.317	6.872	6.034	3.674	3.018	7.983	8.934	8.458	18.852	20.944	15.191	7.688	2.438	9.882	1.642	1.869	3.059
BGIBMGA010311	brown	Toxin_fatbody	gi|91080441|ref|XP_969036.1| PREDICTED: similar to AGAP009144-PA [Tribolium castaneum]	7e-08	70.73	1.23415	4.05828	0.000384211	0.00456557	NA	NA	NA	NA	NA	NA	NA	NA	NA	NA	NA	NA	2.253	27.666	29.572	19.138	20.418	19.446	9.753	7.746	13.291	37.02	34.443	42.24	18.573	1.965	2.024	12.337	17.149	18.682	22.509	27.477	25.893	33.456	46.722	49.29
BGIBMGA010318	magenta	CK_hemocyte	gi|512907899|ref|XP_004926557.1| PREDICTED: rRNA-processing protein FCF1 homolog [Bombyx mori]	1e-135	100	NA	NA	NA	NA	NA	NA	NA	NA	NA	NA	NA	NA	-6.75847	3.71308	0.000377502	0.00675737	0	45.012	0	0	0	0	0	0	0	0	0	0	0	0	0	0	0	0	0	0	0	0	0	0
BGIBMGA009055	blue	Toxin_fatbody	gi|512898523|ref|XP_004924420.1| PREDICTED: solute carrier family 22 member 3-like [Bombyx mori]	0	100	1.74847	3.74893	7.81876e-06	0.000158451	NA	NA	NA	NA	NA	NA	NA	NA	NA	NA	NA	NA	0	0	0	0.66	0.475	1.114	5.677	5.292	7.356	3.336	2.769	2.648	0	0	0	1.289	1.202	0.951	21.911	23.264	19.925	1.125	1.594	0.617
BGIBMGA010329	grey	Toxin_midgut	gi|512907828|ref|XP_004926539.1| PREDICTED: LOW QUALITY PROTEIN: esterase B1-like [Bombyx mori]	9e-27	88.33	NA	NA	NA	NA	1.32265	5.3592	1.09633e-09	9.53204e-08	NA	NA	NA	NA	NA	NA	NA	NA	0.373	0	0	0	0.33	0	0.636	1.319	0.647	39.867	35.427	30.773	0	0	0	0	0.054	0	2.988	2.542	1.51	74.707	83.417	103.75
BGIBMGA009101	blue	Toxin_fatbody,Toxin_midgut	gi|512898492|ref|XP_004924413.1| PREDICTED: uncharacterized protein LOC101739953 isoform X1 [Bombyx mori]	0	100	1.88026	5.58011	8.67642e-19	8.89503e-17	1.70343	5.63786	4.05943e-15	8.18536e-13	NA	NA	NA	NA	NA	NA	NA	NA	195.993	211.975	195.774	104.294	105.822	102.96	25.504	21.849	23.264	32.643	38.708	35.819	172.246	182.384	169.661	94.711	101.382	100.341	91.044	86.53	92.078	114.108	116.773	115.382
BGIBMGA010387	yellow	Toxin_fatbody	gi|112983220|ref|NP_001037016.1| J domain-containing protein [Bombyx mori] gi|28201816|sp|Q9U6V7.1|JDP_BOMMO RecName: Full=J domain-containing protein gi|5815357|gb|AAD52652.1|AF176014_1 J domain containing protein [Bombyx mori] gi|253721965|gb|ACT34046.1| DnaJ-12 [Bombyx mori]	8e-121	96.05	1.97406	3.96069	1.04744e-07	3.22148e-06	NA	NA	NA	NA	NA	NA	NA	NA	NA	NA	NA	NA	12.05	11.759	12.117	2.789	3.603	4.519	6.202	6.958	6.562	1.568	1.689	1.533	14.126	16.126	12.7	3.81	4.33	3.958	29.122	26.632	26.298	2.572	2.531	2.652
BGIBMGA010432	yellow	Toxin_fatbody	gi|379699018|ref|NP_001243982.1| UDP-glycosyltransferase UGT46A1 [Bombyx mori] gi|363896198|gb|AEW43183.1| UDP-glycosyltransferase UGT46A1 [Bombyx mori]	0	99.22	5.84665	2.50132	0.00262719	0.0229597	NA	NA	NA	NA	NA	NA	NA	NA	NA	NA	NA	NA	0	0	0	0	0	0	0	0	0	0	0	0	0.306	0	0	0	0	0	0	27.678	0	0	0	0
BGIBMGA010439	yellow	Toxin_fatbody	gi|112984208|ref|NP_001037448.1| lysozyme precursor [Bombyx mori] gi|1346474|sp|P48816.1|LYS_BOMMO RecName: Full=Lysozyme; AltName: Full=1,4-beta-N-acetylmuramidase; Flags: Precursor	3e-97	100	6.47237	8.16377	2.63647e-162	2.75695e-159	NA	NA	NA	NA	NA	NA	NA	NA	NA	NA	NA	NA	1.065	0.874	1.063	0.347	0.361	0.217	6.284	8.796	6.724	0	0.096	0.77	6.421	5.456	4.075	0.082	0.349	0.229	695.557	661.855	699.415	3.117	2.715	2.622
BGIBMGA010440	yellow	Toxin_fatbody	gi|512920129|ref|XP_004929555.1| PREDICTED: PCTP-like protein-like [Bombyx mori]	6e-30	100	4.2194	2.59349	9.60259e-07	2.4138e-05	NA	NA	NA	NA	NA	NA	NA	NA	NA	NA	NA	NA	0	0	0.13	0	0	0	0.803	0.031	0.433	0	0	0	0	0	0	0	0	0	13.97	8.275	6.792	0	0	0
BGIBMGA009106	blue	Toxin_fatbody	gi|112983028|ref|NP_001037077.1| glutathione S-transferase sigma 1 [Bombyx mori] gi|31559115|gb|AAP50848.1| glutathione S-transferase 2 [Bombyx mori] gi|112361467|gb|ABI15775.1| glutathione S-transferase 2 [Bombyx mori]	1e-144	99.51	1.22854	7.39145	5.95157e-15	4.71481e-13	NA	NA	NA	NA	NA	NA	NA	NA	NA	NA	NA	NA	1.161	0.837	0.998	14.666	14.785	15.422	123.655	106.744	113.893	40.153	40.326	44.466	0.6	0.297	0.708	13.702	13.465	13.112	273.708	272.389	290.349	53.215	52.687	52.426
BGIBMGA010464	red	CK_fatbody	gi|512919600|ref|XP_004929423.1| PREDICTED: acidic leucine-rich nuclear phosphoprotein 32 family member B-like isoform X3 [Bombyx mori]	1e-62	100	-1.30744	7.09186	5.55583e-11	3.01023e-09	NA	NA	NA	NA	NA	NA	NA	NA	NA	NA	NA	NA	69.098	98.928	107.153	169.904	154.869	151.421	168.96	214.139	247.593	240.019	174.321	163.409	129.197	186.925	124.718	181.776	194.841	268.469	92.523	84.267	86.194	127.14	108.611	127.06
BGIBMGA010499	turquoise	CK_hemocyte	gi|512919531|ref|XP_004929406.1| PREDICTED: spermatogenesis-associated protein 5-like [Bombyx mori]	0	100	NA	NA	NA	NA	NA	NA	NA	NA	NA	NA	NA	NA	-2.39804	2.95917	0.00278004	0.0379188	5.581	2.788	11.813	6.355	7.958	3.294	3.754	6.047	3.135	3.254	3.365	0	1.765	0.74	0	8.055	7.62	5.129	0.676	1.966	5.586	0	2.924	7.285
BGIBMGA010513	turquoise	Toxin_fatbody	gi|359751403|ref|NP_001240825.1| glutamate transporter [Bombyx mori] gi|343129567|gb|AEL88626.1| glutamate transporter [Bombyx mori]	0	100	1.06733	6.50217	4.38996e-09	1.81446e-07	NA	NA	NA	NA	NA	NA	NA	NA	NA	NA	NA	NA	3.748	3.725	4.56	7.427	6.641	4.924	64.311	66.105	68.358	1.22	0.598	1.684	6.619	6.273	5.712	3.179	4.764	4.744	146.036	143.806	142.065	1.863	1.285	2.797
BGIBMGA009122	pink	CK_fatbody,CK_midgut	gi|512905824|ref|XP_004926041.1| PREDICTED: nucleolar protein 9-like [Bombyx mori]	0	100	-1.32628	5.17686	3.66025e-08	1.24746e-06	-1.17967	3.54899	0.00318613	0.0435086	NA	NA	NA	NA	NA	NA	NA	NA	19.905	13.933	15.699	34.011	37.687	36.729	52.656	57.274	46.389	21.173	20.158	20.254	19.641	23.95	23.002	37.896	38.012	34.17	20.2	20.011	26.283	7.848	8.699	10.615
BGIBMGA010538	green	CK_fatbody	gi|512919715|ref|XP_004929453.1| PREDICTED: leucine-rich PPR motif-containing protein, mitochondrial-like [Bombyx mori]	0	99.61	-1.08417	6.00975	4.09089e-07	1.12279e-05	NA	NA	NA	NA	NA	NA	NA	NA	NA	NA	NA	NA	33.011	31.117	32.534	86.6	85.203	85.722	89.157	97.152	91.005	117.183	107.517	107.206	31.405	31.927	35.092	91.647	87.172	90.765	45.113	44.912	46.788	73.139	72.203	77.844
BGIBMGA009184	blue	Toxin_fatbody	gi|281398206|gb|ADA67926.1| putative peptidase [Bombyx mori]	0	100	3.38006	2.59351	2.10993e-05	0.000382383	NA	NA	NA	NA	NA	NA	NA	NA	NA	NA	NA	NA	0.128	0.066	0.197	0.052	0.043	0	0.85	0.298	1.054	0.427	0.243	0	0.162	0.547	0.093	0	0	0	10.705	7.735	8.608	0	0.134	0.019
BGIBMGA010546	brown	Toxin_fatbody	gi|512919765|ref|XP_004929465.1| PREDICTED: serine protease easter-like [Bombyx mori]	0	99.73	1.67451	7.18031	1.46807e-21	1.7249e-19	NA	NA	NA	NA	NA	NA	NA	NA	NA	NA	NA	NA	14.655	14.963	15.072	0.033	0.286	0.169	66.916	92.565	79.697	1.38	1.582	1.748	21.002	18.151	19.751	0	0.182	0.293	266.43	252.477	271.227	2.424	2.441	2.16
BGIBMGA010547	red	Toxin_fatbody	no hints			4.37152	3.97291	8.42372e-20	8.98846e-18	NA	NA	NA	NA	NA	NA	NA	NA	NA	NA	NA	NA	0.23	0.383	0.459	0.068	0	0.121	1.847	1.259	1.316	0	0	0.219	0.423	0	0.195	0	0	0	34.735	34.05	34.528	0	0	0
BGIBMGA010576	purple	Toxin_fatbody	gi|512919926|ref|XP_004929503.1| PREDICTED: protein numb-like isoform X1 [Bombyx mori]	0	97.3	1.30415	3.42674	0.00456364	0.0362354	NA	NA	NA	NA	NA	NA	NA	NA	NA	NA	NA	NA	22.893	18.382	19.752	3.759	3.969	4.075	5.96	6.941	4.949	10.978	11.016	11.974	16.956	16.983	16.07	3.89	4.184	2.53	15.013	14.992	15.485	11.884	9.288	12.998
BGIBMGA010594	turquoise	Toxin_hemocyte	gi|91081311|ref|XP_969542.1| PREDICTED: similar to GA18017-PA [Tribolium castaneum]	8e-149	39.22	NA	NA	NA	NA	NA	NA	NA	NA	NA	NA	NA	NA	5.06718	2.50197	0.000489257	0.00864529	0	0	0	0	0	0	0.776	1.205	0.868	0	0.107	0.302	4.6	4.162	5.529	0	0	0	0.483	1.355	1.291	0.156	0	0
BGIBMGA010649	green	CK_fatbody	gi|571523568|ref|XP_003250145.2| PREDICTED: cell wall protein DAN4-like [Apis mellifera]	4e-62	56.34	-2.01593	5.6916	5.09953e-17	4.80413e-15	NA	NA	NA	NA	NA	NA	NA	NA	NA	NA	NA	NA	0.146	0	0	0	0.262	0.089	78.368	89.881	83.678	9.631	7.992	8.822	0	0	0.14	0.184	0.133	0.123	19.522	22.473	23.014	2.559	2.486	3.745
BGIBMGA010692	red	Toxin_fatbody	no hints			1.60461	3.26794	0.00068487	0.00746009	NA	NA	NA	NA	NA	NA	NA	NA	NA	NA	NA	NA	1.741	3.388	4.421	12.034	10.988	9.855	3.833	4.405	5.582	0.175	1.447	0.541	4.772	3.853	2.417	11.246	10.505	10.896	11.619	15.01	15.952	1.885	2.473	0.281
BGIBMGA009203	blue	Toxin_fatbody	no hints			2.05469	3.32496	4.24282e-05	0.000688931	NA	NA	NA	NA	NA	NA	NA	NA	NA	NA	NA	NA	0	0.441	0.516	5.231	2.447	2.229	2.995	4.084	3.811	2.6	2.336	3.137	1.858	0.982	1.268	1.903	5.09	1.75	15.466	18.271	14.152	8.02	3.581	6.787
BGIBMGA010741	brown	Toxin_fatbody	gi|512934415|ref|XP_004933027.1| PREDICTED: facilitated trehalose transporter Tret1-like [Bombyx mori]	0	96.7	2.673	4.38437	6.75947e-16	5.84164e-14	NA	NA	NA	NA	NA	NA	NA	NA	NA	NA	NA	NA	0	0	0	0.157	0	0	7.386	5.476	5.602	347.324	378.335	355.266	0	0.167	0	0	0	0	42.242	41.167	43.204	475.646	460.53	470.118
BGIBMGA010742	turquoise	Toxin_fatbody	gi|512934721|ref|XP_004933101.1| PREDICTED: facilitated trehalose transporter Tret1-like [Bombyx mori]	0	98.54	4.62703	3.86196	2.54966e-19	2.66618e-17	NA	NA	NA	NA	NA	NA	NA	NA	NA	NA	NA	NA	0	0	0	0	0	0.092	0.669	0.628	0.681	9.089	7.629	8.639	0	0	0	0	0	0	30.816	32.062	33.747	11.137	11.149	11.757
BGIBMGA009259	pink	Toxin_fatbody	gi|512891154|ref|XP_004922635.1| PREDICTED: fibrohexamerin-like [Bombyx mori]	2e-133	82.01	1.59665	11.4569	9.47491e-28	1.33891e-25	NA	NA	NA	NA	NA	NA	NA	NA	NA	NA	NA	NA	0.833	0.523	0	0	0.196	0	1419.42	1785.39	1541.29	1.131	0.786	1.977	0	0	0	0	0	0	5109.93	4800.66	4944.56	1.888	1.26	0.499
BGIBMGA010841	cyan	CK_midgut	gi|114051477|ref|NP_001040362.1| mitochondrial ribosomal protein S10 [Bombyx mori] gi|95102636|gb|ABF51256.1| mitochondrial ribosomal protein S10 [Bombyx mori]	1e-122	100	NA	NA	NA	NA	-1.05692	4.85156	5.8965e-06	0.000229021	NA	NA	NA	NA	NA	NA	NA	NA	11.618	24.101	23.451	41.567	38.431	44.701	48.817	59.501	55.978	58.949	55.666	51.828	26.642	21.6	16.599	46.193	48.932	46.63	35.251	26.299	31.254	27.609	24.357	27.28
BGIBMGA009285	pink	CK_fatbody,CK_midgut	gi|512891531|ref|XP_004922707.1| PREDICTED: RNA-binding protein 28-like [Bombyx mori]	0	89.72	-1.12059	5.21468	1.6445e-06	4.00852e-05	-1.05939	4.41901	0.000154785	0.00366724	NA	NA	NA	NA	NA	NA	NA	NA	25.582	27.327	25.038	75.146	70.971	72.897	51.032	51.592	53.016	44.424	41.593	34.794	35.799	33.935	36.798	85.327	80.299	89.464	23.109	26.36	23.808	20.134	16.117	20.938
BGIBMGA010878	yellow	CK_hemocyte	gi|512907075|ref|XP_004926353.1| PREDICTED: microvitellogenin-like [Bombyx mori]	8e-42	87.5	NA	NA	NA	NA	NA	NA	NA	NA	NA	NA	NA	NA	-2.20108	10.8815	4.77445e-35	2.31757e-32	1956.17	2910.39	2617.98	0.137	0.797	0.625	9.789	7.741	13.216	0	0	0	573.781	532.292	549.932	0.501	0	0.082	9.986	13.915	7.648	0	0.643	0
BGIBMGA010887	turquoise	CK_fatbody	gi|512897957|ref|XP_004924280.1| PREDICTED: MATH and LRR domain-containing protein PFE0570w-like [Bombyx mori]	0	100	-2.88407	2.28142	0.00635717	0.0478251	NA	NA	NA	NA	NA	NA	NA	NA	NA	NA	NA	NA	1.671	0	0.039	0.196	1.277	1.198	3.439	6.929	4.244	4.098	0.926	3.053	0.023	1.038	1.167	0.719	0.228	1.401	0.26	1.094	0.709	1.587	1.337	0.062
BGIBMGA010913	brown	Toxin_fatbody	gi|290543468|ref|NP_001166291.1| cuticular protein RR-3 motif 148 precursor [Bombyx mori] gi|223671398|tpd|FAA00651.1| TPA: putative cuticle protein [Bombyx mori]	0	100	1.41334	3.74678	0.00039912	0.00471593	NA	NA	NA	NA	NA	NA	NA	NA	NA	NA	NA	NA	0.026	0	0	0.023	0.001	0	7.16	7.24	7.126	17.323	17.27	17.035	0.048	0.199	0.053	0	0.316	0.006	20.481	19.597	20.7	17.737	18.325	17.111
BGIBMGA010914	black	CK_cell	no hints			NA	NA	NA	NA	NA	NA	NA	NA	-7.27775	3.6951	5.72942e-05	0.0183745	NA	NA	NA	NA	0	0	0	0	44.018	0	0	0	0	0	0	0	0	0	0	0	0	0	0	0	0	0	0	0
BGIBMGA010933	magenta	Toxin_fatbody	gi|512899849|ref|XP_004924748.1| PREDICTED: proton-coupled folate transporter-like [Bombyx mori]	0	99.42	1.56803	4.6528	1.1562e-08	4.33348e-07	NA	NA	NA	NA	NA	NA	NA	NA	NA	NA	NA	NA	0	0	0	0	0	0	14.274	14.499	13.527	5.028	4.128	3.851	0	0	0	0	0	0	44.611	43.524	41.394	2.217	2.139	2.265
BGIBMGA010938	turquoise	Toxin_fatbody	gi|512899829|ref|XP_004924743.1| PREDICTED: solute carrier family 46 member 3-like [Bombyx mori]	0	91.4	2.15358	6.12057	1.66506e-24	2.17644e-22	NA	NA	NA	NA	NA	NA	NA	NA	NA	NA	NA	NA	0	0	0	0	0	0.098	28.968	31.908	28.196	8.888	9.516	7.974	0	0	0	0	0	0.122	140.81	141.225	127.243	11.29	9.188	11.128
BGIBMGA010988	brown	CK_midgut	gi|512902952|ref|XP_004925500.1| PREDICTED: LOW QUALITY PROTEIN: liver carboxylesterase-like [Bombyx mori]	0	95.51	NA	NA	NA	NA	-1.61179	4.15455	3.88373e-07	2.07944e-05	NA	NA	NA	NA	NA	NA	NA	NA	0.578	0.538	0.136	0.635	0.433	0.553	0.047	0.114	0	38.351	33.959	34.905	0.116	0.074	0	0.106	0.39	0.438	0.164	0.537	0.203	10.613	10.815	11.728
BGIBMGA009488	blue	CK_fatbody	gi|512891979|ref|XP_004922817.1| PREDICTED: prostatic acid phosphatase-like isoform X1 [Bombyx mori]	0	100	-1.29468	10.518	5.26862e-24	6.5588e-22	NA	NA	NA	NA	NA	NA	NA	NA	NA	NA	NA	NA	95.183	100.214	88.252	0.453	0.706	1.655	2519.3	2204.81	2310.25	17.947	16.011	19.232	72.226	71.54	68.489	1.098	0.678	1.318	985.002	1019.32	958.298	10.95	10.801	10.476
BGIBMGA011002	magenta	CK_hemocyte	gi|512902991|ref|XP_004925510.1| PREDICTED: aminoacylase-1-like [Bombyx mori]	0	100	NA	NA	NA	NA	NA	NA	NA	NA	NA	NA	NA	NA	-1.79937	7.43761	6.72869e-25	1.58643e-22	191.603	216.36	230.414	0.091	0.135	0.042	0.863	0.919	0.625	0.121	0	0.442	62.408	60.81	64.163	0.069	0.288	0.099	0.545	0.933	1.18	0.227	0.936	0.378
BGIBMGA009685	greenyellow	CK_fatbody	gi|512935453|ref|XP_004933279.1| PREDICTED: transcriptional regulator ATRX homolog isoform X1 [Bombyx mori]	0	100	-1.70333	6.73238	9.92364e-19	1.00749e-16	NA	NA	NA	NA	NA	NA	NA	NA	NA	NA	NA	NA	51.315	56.894	68.858	703.992	752.254	750.614	170.732	186.566	162.26	144.494	146.715	124.046	76.099	91.367	85.772	819.911	793.198	790.214	56.442	54.734	54.229	45.247	109.497	49.724
BGIBMGA011012	turquoise	CK_hemocyte	gi|512886414|ref|XP_004921752.1| PREDICTED: organic cation transporter protein-like [Bombyx mori]	0	100	NA	NA	NA	NA	NA	NA	NA	NA	NA	NA	NA	NA	-1.18329	4.34439	0.000844257	0.014046	26.472	13.664	20.239	3.477	1.735	4.465	2.69	8.443	9.267	3.166	4.337	8.494	8.39	6.6	10.235	3.822	5.625	2.17	1.092	5.072	0.307	5.144	7.972	7.585
BGIBMGA011033	magenta	CK_fatbody	gi|512886289|ref|XP_004921733.1| PREDICTED: UDP-N-acetylglucosamine--peptide N-acetylglucosaminyltransferase 110 kDa subunit-like [Bombyx mori]	0	100	-1.04051	6.83819	3.39973e-09	1.45106e-07	NA	NA	NA	NA	NA	NA	NA	NA	NA	NA	NA	NA	149.235	144.781	145.081	127.497	127.169	125.63	162.996	161.513	175.215	109.638	112.164	118.365	108.244	104.045	110.599	111.724	115.135	116.542	85.01	82.42	82.144	70.759	67.986	65.66
BGIBMGA011035	cyan	CK_fatbody,CK_midgut	gi|189239114|ref|XP_001813413.1| PREDICTED: similar to copia-type polyprotein, putative [Tribolium castaneum]	1e-88	48.31	-1.30059	4.94763	5.52197e-07	1.46929e-05	-1.5512	3.92723	1.00838e-05	0.000360621	NA	NA	NA	NA	NA	NA	NA	NA	42.241	42.211	46.496	124.168	132.078	130.428	41.143	47.993	42.293	30.624	28.749	30.566	28.124	29.01	29.258	122.245	122.026	117.155	18.641	19.678	16.771	9.055	10.375	10.823
BGIBMGA009925	greenyellow	Toxin_fatbody	gi|512895619|ref|XP_004923716.1| PREDICTED: glucose dehydrogenase [acceptor]-like [Bombyx mori]	0	100	2.80277	2.59318	0.000222252	0.00288707	NA	NA	NA	NA	NA	NA	NA	NA	NA	NA	NA	NA	0	0.107	0	0.004	0	0.01	1.514	1.557	1.533	0.159	0.403	0.501	0	0.128	0.114	0.034	0	0	8.407	9.796	9.664	0.387	0	0.207
BGIBMGA009971	blue	Toxin_fatbody	gi|512907520|ref|XP_004926463.1| PREDICTED: E3 ubiquitin-protein ligase MARCH8-like [Bombyx mori]	2e-109	96.93	1.06558	4.86231	2.51353e-05	0.000438798	NA	NA	NA	NA	NA	NA	NA	NA	NA	NA	NA	NA	96.021	103.774	98.879	12.427	12.958	13.846	21.481	21.235	18.56	30.318	37.825	38.203	104.151	109.028	99.517	11.449	13.98	11.898	41.778	45.733	45.974	51.542	61.699	57.557
BGIBMGA011198	turquoise	CK_hemocyte	gi|512925490|ref|XP_004930852.1| PREDICTED: TBC1 domain family member 1-like [Bombyx mori]	0	88.44	NA	NA	NA	NA	NA	NA	NA	NA	NA	NA	NA	NA	-1.03716	5.80407	2.23621e-07	8.91457e-06	63.665	56.307	54.119	9.846	9.039	9.661	5.262	6.565	5.391	7.946	6.153	7.929	26.904	29.189	28.941	8.224	8.411	8.352	7.387	8.087	6.246	8.432	7.566	7.151
BGIBMGA011224	purple	CK_fatbody	gi|512925102|ref|XP_004930756.1| PREDICTED: organic cation transporter protein-like [Bombyx mori]	2e-85	96.27	-1.88164	4.50574	9.8701e-09	3.76685e-07	NA	NA	NA	NA	NA	NA	NA	NA	NA	NA	NA	NA	0	0	0.49	0.368	0.174	0.318	39.652	24.525	37.335	2.347	2.548	1.618	0	0.788	0	0.592	0.096	0	10.386	10.821	8.27	0.44	0.64	0
BGIBMGA011225	turquoise	CK_fatbody	gi|512925102|ref|XP_004930756.1| PREDICTED: organic cation transporter protein-like [Bombyx mori]	0	100	-1.29107	4.15638	0.000268398	0.00336124	NA	NA	NA	NA	NA	NA	NA	NA	NA	NA	NA	NA	0.395	0	0.527	0.138	0.044	0.284	23.267	20.333	26.71	1.751	1.135	1.675	0	0	0.303	0.156	0.472	0.199	12.336	8.788	7.435	0.943	0.334	0
BGIBMGA011228	purple	Toxin_hemocyte	gi|512925431|ref|XP_004930838.1| PREDICTED: multidrug resistance protein homolog 49-like [Bombyx mori]	0	92.34	NA	NA	NA	NA	NA	NA	NA	NA	NA	NA	NA	NA	1.57931	5.13936	3.11475e-09	1.64762e-07	14.498	11.739	13.423	0.096	0.095	0.073	0.484	0.401	0.512	0.15	0.129	0.299	40.963	41.544	37.486	0.042	0.041	0	1.369	1.063	2.284	0.196	0.342	0.267
BGIBMGA011251	yellow	Toxin_fatbody	gi|512925016|ref|XP_004930735.1| PREDICTED: LOW QUALITY PROTEIN: SID1 transmembrane family member 1 [Bombyx mori]	0	91.88	1.26448	4.74411	1.78697e-06	4.27604e-05	NA	NA	NA	NA	NA	NA	NA	NA	NA	NA	NA	NA	15.76	16.423	13.349	14.806	12.782	16.41	16.761	14.98	19.882	7.848	9.359	8.215	16.686	19.509	15.882	14.624	13.58	14.027	45.894	43.324	38.699	13.731	15.225	14.971
BGIBMGA010178	blue	CK_fatbody	gi|112982956|ref|NP_001037676.1| splicing factor arginine/serine-rich 6 [Bombyx mori] gi|109706819|gb|ABG42996.1| splicing factor arginine/serine-rich 6 [Bombyx mori]	2e-122	95.7	-1.10366	7.02287	2.61302e-10	1.31367e-08	NA	NA	NA	NA	NA	NA	NA	NA	NA	NA	NA	NA	65.76	88.445	81.697	100.305	101.965	102.682	210.203	176.506	192.076	146.383	141.583	156.37	96.525	113.733	101.905	93.383	111.698	109.646	89.901	96.686	89.643	83.411	75.151	82.725
BGIBMGA010235	blue	Toxin_fatbody	gi|512927424|ref|XP_004931331.1| PREDICTED: LOW QUALITY PROTEIN: sarcalumenin-like [Bombyx mori]	0	96.6	1.83064	4.86413	1.11392e-12	7.41928e-11	NA	NA	NA	NA	NA	NA	NA	NA	NA	NA	NA	NA	0.219	0.096	0	14.081	16.063	14.689	14.436	13.007	14.829	276.576	251.247	248.401	0.096	0.099	0.341	15.669	14.841	16.408	53.075	52.451	53.418	275.246	259.596	278.155
BGIBMGA011297	magenta	CK_hemocyte	gi|112982695|ref|NP_001036909.1| activator of 90 kDa heat shock protein ATPase homolog 1 [Bombyx mori]	0	99.71	NA	NA	NA	NA	NA	NA	NA	NA	NA	NA	NA	NA	-1.11417	6.73334	2.58925e-09	1.43399e-07	109.703	110.679	122.222	161.765	173.853	173.813	44.976	43.168	47.051	44.679	43.71	35.656	54.191	49.721	57.114	171.997	164.446	159.659	28.101	23.245	25.555	30.016	27.349	34.661
BGIBMGA011311	cyan	Toxin_fatbody	gi|443429433|gb|AGC92717.1| haspin-like protein [Heliconius erato]	0	80.2	1.48735	6.22292	3.03622e-14	2.30071e-12	NA	NA	NA	NA	NA	NA	NA	NA	NA	NA	NA	NA	76.392	75.761	77.808	55.98	58.394	63.003	41.787	46.846	45.234	67.023	73.903	71.158	105.979	110.48	108.798	55.836	54.729	57.986	134.069	132.192	124.694	94.921	98.217	89.755
BGIBMGA011320	brown	Toxin_fatbody	gi|512925301|ref|XP_004930805.1| PREDICTED: leucine-rich repeat-containing protein 70-like [Bombyx mori]	0	100	1.4105	5.138	0.00364715	0.0300775	NA	NA	NA	NA	NA	NA	NA	NA	NA	NA	NA	NA	18.592	18.004	4.262	0.128	0.096	0.198	29.524	0.165	34.958	512.115	501.795	493.243	12.54	10.345	12.729	0.223	0.396	0.245	59.453	52.219	67.047	599.694	560.908	628.414
BGIBMGA011335	tan	CK_fatbody	gi|324073393|ref|NP_001191248.1| ovarian tumor protein [Bombyx mori] gi|320580015|gb|ADW54422.1| ovarian tumor protein [Bombyx mori]	0	100	-1.10142	3.89818	0.0059708	0.0454085	NA	NA	NA	NA	NA	NA	NA	NA	NA	NA	NA	NA	6.851	6.409	6.237	9.35	9.031	8.763	17.384	22.047	16.475	1.971	4.615	2.531	4.37	5.519	3.997	10.378	9.486	6.927	8.465	8.501	8.463	2.084	1.48	1.534
BGIBMGA011369	green	Toxin_hemocyte,Toxin_fatbody	gi|512925407|ref|XP_004930832.1| PREDICTED: serine/threonine-protein kinase par-1-like [Bombyx mori]	6e-26	100	1.11402	5.5072	5.02307e-08	1.66222e-06	NA	NA	NA	NA	NA	NA	NA	NA	1.27627	5.88515	1.79417e-10	1.2547e-08	24.08	27.791	27.569	22.301	20.063	23.782	34.701	37.368	25.541	28.362	37.971	29.656	63.305	63.245	70.396	22.981	26.834	31.76	73.531	73.315	68.169	40.682	44.021	29.118
BGIBMGA011390	magenta	CK_hemocyte	gi|512925474|ref|XP_004930848.1| PREDICTED: P protein-like [Bombyx mori]	0	100	NA	NA	NA	NA	NA	NA	NA	NA	NA	NA	NA	NA	-1.04504	6.48909	1.71464e-08	8.22627e-07	93.168	93.327	96.565	51.5	52.307	51.855	30.116	33.708	35.246	11.651	10.142	9.734	45.373	47.222	45.928	48.791	50.72	49.921	44.257	40.204	43.329	20.348	18.014	18.774
BGIBMGA010240	blue	CK_fatbody	gi|10119784|dbj|BAB13481.1| chitinase precursor [Bombyx mori]	0	99.82	-1.49794	4.36261	6.54306e-06	0.000135487	NA	NA	NA	NA	NA	NA	NA	NA	NA	NA	NA	NA	2.213	2.349	3.853	0.053	0	0.018	28.937	29.02	27.822	7.093	10.496	8.264	1.116	1.857	1.165	0	0.104	0	12.689	9.34	9.722	5.573	5.235	4.163
BGIBMGA010326	blue	CK_fatbody	gi|512907850|ref|XP_004926545.1| PREDICTED: mitochondrial carnitine/acylcarnitine carrier protein CACL-like isoform X1 [Bombyx mori]	0	100	-1.53578	3.76531	0.000591369	0.00655046	NA	NA	NA	NA	NA	NA	NA	NA	NA	NA	NA	NA	0	0	0	0	0	0	22.274	15.365	16.004	0.335	0.796	0	0	0	0.06	0	0	0	2.219	7.046	9.222	0	0	0
BGIBMGA010361	blue	CK_fatbody	gi|182509200|ref|NP_001116811.1| muscle glycogen phosphorylase [Bombyx mori] gi|170963365|gb|ACB41088.1| glycogen phosphorylase [Bombyx mori]	0	99.76	-1.41632	6.11092	2.78804e-11	1.57592e-09	NA	NA	NA	NA	NA	NA	NA	NA	NA	NA	NA	NA	38.478	36.69	33.823	51.968	55.317	52.877	111.744	103.173	101.283	110.599	107.677	102.562	36.622	37.35	38.973	51.025	52.79	53.112	38.335	43.028	41.386	66.013	63.554	71.031
BGIBMGA011409	red	CK_hemocyte	gi|512925226|ref|XP_004930787.1| PREDICTED: scavenger receptor class B member 1-like [Bombyx mori]	1e-148	100	NA	NA	NA	NA	NA	NA	NA	NA	NA	NA	NA	NA	-1.65546	5.04774	2.34073e-08	1.07909e-06	49.929	33.586	28.73	0.957	0.436	0.96	7.221	8.937	10.229	0.925	0	0.37	12.566	10.493	11.676	1.047	0.884	1.394	7.198	12.132	5.49	0	0.734	0
BGIBMGA011440	green	Toxin_fatbody	gi|512933046|ref|XP_004932694.1| PREDICTED: uncharacterized protein LOC101739051 isoform X1 [Bombyx mori]	8e-161	100	1.77742	3.26865	0.000434545	0.00507951	NA	NA	NA	NA	NA	NA	NA	NA	NA	NA	NA	NA	0	0	0.561	0.073	0.049	0.11	2.775	4.054	5.157	22.87	26.913	26.778	3.296	4.507	3.133	0.252	0	0.087	13.669	12.059	17.609	22.59	21.663	24.444
BGIBMGA011441	cyan	Toxin_hemocyte,Toxin_midgut	no hints			NA	NA	NA	NA	1.8814	5.26262	1.36993e-18	4.05714e-16	NA	NA	NA	NA	3.78004	2.87128	7.66103e-05	0.0017179	0.412	1.269	0.215	6.77	7.421	7.006	1.467	3.477	1.369	26.099	25.038	23.771	8.201	6.669	5.327	8.098	7.723	6.712	3.852	3.498	3.745	85.733	88.726	97.689
BGIBMGA011458	green	CK_midgut	gi|255977206|dbj|BAH97095.1| juvenile hormone binding protein [Bombyx mori]	0	100	NA	NA	NA	NA	-2.07818	3.10879	6.9519e-05	0.00182502	NA	NA	NA	NA	NA	NA	NA	NA	0.676	0	0.218	0	0	0	9.859	8.325	11.47	17.638	17.087	14.401	0.589	0	0	0	0	0	10.358	10.459	8.772	3.576	2.549	4.161
BGIBMGA010454	blue	Toxin_fatbody	gi|512919626|ref|XP_004929430.1| PREDICTED: integrin alpha-PS3-like [Bombyx mori]	0	94.88	1.44484	5.51519	9.75224e-13	6.53713e-11	NA	NA	NA	NA	NA	NA	NA	NA	NA	NA	NA	NA	790.034	892.179	881.761	58.564	59.709	61.618	28.675	28.857	25.713	2.579	2.586	3.178	1013.55	1013.62	995.011	56.336	59.055	56.108	81.232	76.203	77.833	2.061	2.545	3.156
BGIBMGA011477	red	Toxin_hemocyte	gi|512932872|ref|XP_004932651.1| PREDICTED: hexokinase type 2-like isoform X2 [Bombyx mori]	0	100	NA	NA	NA	NA	NA	NA	NA	NA	NA	NA	NA	NA	1.20459	8.58844	6.4249e-18	1.08201e-15	175.07	186.875	197.328	75.024	76.823	84.169	159.908	159.213	148.161	479.525	469.738	454.222	448.052	428.508	437.15	58.626	65.978	59.885	111.265	119.316	120.938	565.04	570.218	587.914
BGIBMGA011495	cyan	Toxin_fatbody	gi|20138941|sp|P82818.1|MOR1_BOMMO RecName: Full=Moricin-1; Flags: Precursor	3e-28	100	8.52311	6.324	5.0987e-86	2.05066e-83	NA	NA	NA	NA	NA	NA	NA	NA	NA	NA	NA	NA	0	0	0	0	0	0	0	0.763	0.262	0	0	0	0	0	0	0	0	0	190.009	197.697	212.545	0.561	1.108	3.316
BGIBMGA011497	black	Toxin_hemocyte	gi|512933177|ref|XP_004932726.1| PREDICTED: early growth response protein 3-like [Bombyx mori]	3e-50	100	NA	NA	NA	NA	NA	NA	NA	NA	NA	NA	NA	NA	1.10354	4.71257	0.000260736	0.00508652	11.952	12.423	11.99	13.914	13.732	14	0	0.923	1.096	0.379	0.02	0.737	27.045	28.917	23.233	17.57	16.279	13.462	3.26	1.847	0.581	1.194	0.108	0.08
BGIBMGA010530	blue	CK_midgut	gi|512920157|ref|XP_004929562.1| PREDICTED: nose resistant to fluoxetine protein 6-like [Bombyx mori]	5e-165	99.58	NA	NA	NA	NA	-4.79793	1.82793	0.001956	0.0295646	NA	NA	NA	NA	NA	NA	NA	NA	0	0	0	0	0	0	0.456	0	0	4.899	4.493	4.249	0	0	0	0	0	0	0.372	0.087	0.164	0.552	0.682	0.417
BGIBMGA011522	yellow	CK_hemocyte	gi|108875944|gb|EAT40169.1| AAEL008087-PA [Aedes aegypti]	1e-71	39.2	NA	NA	NA	NA	NA	NA	NA	NA	NA	NA	NA	NA	-1.09756	4.91463	0.000123629	0.00258275	31.244	27.672	31.347	0.114	0.397	0.237	0.196	0.302	0.424	0.068	0.18	0	15.777	14.778	12.683	0.301	0.192	0.524	0.168	0.699	0.809	0	0	0
BGIBMGA011540	turquoise	Toxin_midgut	no hints			NA	NA	NA	NA	1.11261	5.00193	2.00122e-07	1.16353e-05	NA	NA	NA	NA	NA	NA	NA	NA	68.235	71.584	72.12	18.571	25.277	16.644	77.682	59.376	70.375	28.136	31.804	30.259	74.366	72.747	64.899	15.727	16.096	17.857	66.31	71.009	80.087	71.599	65.801	56.652
BGIBMGA011584	brown	CK_cell,CK_fatbody,Toxin_hemocyte	gi|512933054|ref|XP_004932696.1| PREDICTED: iron-sulfur cluster assembly enzyme ISCU, mitochondrial-like [Bombyx mori]	3e-84	100	-4.35585	5.51294	0.00107423	0.0108638	NA	NA	NA	NA	-6.79752	5.68599	1.59921e-06	0.00092317	3.81897	5.61993	0.000316575	0.00597797	5.016	5.788	2.675	0.347	0.082	202.112	252.013	3.875	2.016	2.457	268.558	1.531	4.28	206.729	6.015	1.273	0	0.386	4.706	4.595	4.552	304.572	5.113	277.8
BGIBMGA010544	blue	Toxin_fatbody	gi|114051920|ref|NP_001040437.1| muscular protein 20 [Bombyx mori] gi|95102890|gb|ABF51386.1| muscular protein 20 [Bombyx mori]	8e-123	99.43	1.38331	3.23787	0.00339767	0.02845	NA	NA	NA	NA	NA	NA	NA	NA	NA	NA	NA	NA	0	0	0	3.433	3.424	4.341	4.741	5.39	4.873	121.861	101.43	99.831	0.19	0	0	3.289	3.102	3.009	12.529	10.792	16.04	132.755	123.74	148.617
BGIBMGA010837	greenyellow	CK_midgut	gi|512934567|ref|XP_004933064.1| PREDICTED: equilibrative nucleoside transporter 2-like [Bombyx mori]	0	100	NA	NA	NA	NA	-1.0758	6.26752	4.90653e-09	3.87494e-07	NA	NA	NA	NA	NA	NA	NA	NA	17.342	17.412	15.999	30.663	28.109	30.713	257.245	253.687	313.997	154.196	152.616	158.928	19.847	20.806	21.616	25.603	28.871	31.033	186.213	190.552	184.504	79.285	70.392	68.744
BGIBMGA011010	pink	Toxin_fatbody	gi|512886424|ref|XP_004921754.1| PREDICTED: monocarboxylate transporter 10-like [Bombyx mori]	2e-50	93.41	1.27859	7.6196	1.13048e-15	9.61092e-14	NA	NA	NA	NA	NA	NA	NA	NA	NA	NA	NA	NA	22.088	16.025	21.763	48.626	52.793	54.81	120.622	147.021	125.245	30.187	23.773	22.326	16.298	23.041	27.168	51.933	44.045	42.643	341.566	312.824	334.49	35.144	28.252	35.751
BGIBMGA011070	blue	CK_fatbody	gi|512886197|ref|XP_004921720.1| PREDICTED: THO complex subunit 7 homolog isoform X1 [Bombyx mori]	3e-142	100	-1.20003	4.09757	0.00128093	0.0126008	NA	NA	NA	NA	NA	NA	NA	NA	NA	NA	NA	NA	11.733	14.566	15.172	56.769	54.48	58.019	19.731	26.864	19.403	27.211	23.813	22.624	13.965	16.899	12.9	56.677	45.863	58.055	9.023	11.797	9.931	13.784	15.835	17.816
BGIBMGA011616	yellow	Toxin_fatbody	gi|512928535|ref|XP_004931602.1| PREDICTED: laminin subunit alpha-like [Bombyx mori]	0	100	4.06173	2.50014	3.83613e-06	8.52788e-05	NA	NA	NA	NA	NA	NA	NA	NA	NA	NA	NA	NA	275.532	296.076	300.191	2.128	0	0	0	0	0.812	58.906	60.487	63.015	389.393	394.915	392.679	0	0	0	9.306	8.967	6.685	98.797	99.639	103.43
BGIBMGA011627	tan	CK_cell,Toxin_fatbody	gi|512928816|ref|XP_004931672.1| PREDICTED: uncharacterized protein DDB_G0284459-like [Bombyx mori]	0	99.71	3.89208	3.16656	0.00191674	0.0175424	NA	NA	NA	NA	-5.748	4.02321	7.73241e-05	0.0230879	NA	NA	NA	NA	0.083	1.778	1.916	0.604	1.525	54.852	0	1.692	0.954	94.239	1.101	1.061	0.981	0	0	0.975	0.047	0.04	1.905	0	57.009	92.19	1.115	0
BGIBMGA011638	yellow	Toxin_cell	gi|512928429|ref|XP_004931576.1| PREDICTED: protein FAM49B-like [Bombyx mori]	6e-84	100	NA	NA	NA	NA	NA	NA	NA	NA	5.9712	5.37079	7.94245e-08	6.87737e-05	NA	NA	NA	NA	2.741	3.232	2.817	1.243	1.087	0	1.145	1.322	0.794	4.21	1.939	1.463	4.85	4.613	2.76	0	83.589	76.297	0.197	0.998	0	0	0.893	0.998
BGIBMGA011640	green	Toxin_hemocyte	gi|512928401|ref|XP_004931569.1| PREDICTED: enoyl-CoA delta isomerase 1, mitochondrial-like isoform X1 [Bombyx mori] gi|512928405|ref|XP_004931570.1| PREDICTED: enoyl-CoA delta isomerase 1, mitochondrial-like isoform X2 [Bombyx mori]	1e-50	100	NA	NA	NA	NA	NA	NA	NA	NA	NA	NA	NA	NA	6.27493	3.24045	0.00115203	0.0182818	0	0	0	0	0	0	0	0	0	0	0	0	0	33.593	0	0	0	0	0	0	0	0	0	0
BGIBMGA011073	greenyellow	CK_midgut	gi|512886236|ref|XP_004921725.1| PREDICTED: SET and MYND domain-containing protein 5-like isoform X1 [Bombyx mori]	0	100	NA	NA	NA	NA	-1.06588	4.5254	6.6666e-05	0.00177644	NA	NA	NA	NA	NA	NA	NA	NA	30.16	28.701	31.357	166.714	183.033	186.888	68.938	68.263	67.865	40.879	42.208	46.405	27.887	30.101	33.02	175.112	168.912	167.367	39.411	45.984	42.375	22.4	18.038	20.618
BGIBMGA011755	turquoise	Toxin_hemocyte,Toxin_fatbody,Toxin_midgut	gi|512927911|ref|XP_004931453.1| PREDICTED: 3-phosphoinositide-dependent protein kinase 1-like isoform X1 [Bombyx mori]	0	99.81	1.43174	5.37219	1.2632e-11	7.72474e-10	1.08679	5.39609	1.59518e-08	1.11982e-06	NA	NA	NA	NA	1.27212	7.6539	1.96993e-16	2.90283e-14	91.103	94.592	95.01	27.487	29.349	32.268	26.406	28.734	20.983	40.291	41.691	39.188	236.862	229.117	226.488	36.985	32.874	30.731	70.178	75.971	63.691	88.939	85.291	82.192
BGIBMGA011274	blue	CK_fatbody	gi|512924933|ref|XP_004930714.1| PREDICTED: ribosome biogenesis protein BMS1 homolog [Bombyx mori]	0	100	-3.55422	4.4737	9.64525e-05	0.00142458	NA	NA	NA	NA	NA	NA	NA	NA	NA	NA	NA	NA	39.27	40.216	46.676	0.961	1.464	56.485	1.567	57.519	52.917	45.171	44.098	1.574	48.309	52.601	0.297	66.962	67.442	0.637	2.717	3.665	3.874	26.56	24.423	29.304
BGIBMGA011786	cyan	Toxin_fatbody	gi|315633209|ref|NP_001186866.1| ganglioside-induced differentiation-associated-protein [Bombyx mori] gi|315177973|gb|ADT82940.1| ganglioside-induced differentiation-associated-protein [Bombyx mori]	0	100	1.51129	4.71797	1.81609e-08	6.54856e-07	NA	NA	NA	NA	NA	NA	NA	NA	NA	NA	NA	NA	23.738	23.729	29.004	77.577	119.389	123.573	14.576	15.931	14.144	465.362	364.943	368.564	24.182	20.474	24.364	112.924	107.265	110.589	42.903	46.061	45.067	398.036	312.99	480.295
BGIBMGA011793	brown	CK_fatbody	no hints			-1.19109	5.04855	1.73358e-06	4.16737e-05	NA	NA	NA	NA	NA	NA	NA	NA	NA	NA	NA	NA	20.046	24.579	22.086	30.94	28.281	29.643	51.025	51.03	36.569	38.701	42.6	40.017	35.024	29.251	24.448	33.818	33.445	32.309	21.299	21.692	19.639	29.269	22.523	25.214
BGIBMGA011822	red	CK_fatbody,CK_midgut	gi|512928274|ref|XP_004931539.1| PREDICTED: nucleolar GTP-binding protein 2-like [Bombyx mori]	0	98.53	-1.07453	5.98466	5.6005e-07	1.48264e-05	-1.16989	5.52656	2.18161e-08	1.48742e-06	NA	NA	NA	NA	NA	NA	NA	NA	51.654	50.324	52.315	129.316	138.673	137.061	88.796	96	86.873	94.957	91.961	90.91	61.924	66.118	61.922	151.086	141.622	141.589	47.221	43.496	43.271	35.514	40.452	44.476
BGIBMGA011834	turquoise	CK_midgut	gi|114051463|ref|NP_001040364.1| methionine sulfoxide reductase [Bombyx mori] gi|95102640|gb|ABF51258.1| methionine sulfoxide reductase [Bombyx mori]	7e-159	98.17	NA	NA	NA	NA	-1.07208	6.58361	5.0122e-10	4.79804e-08	NA	NA	NA	NA	NA	NA	NA	NA	0.992	1.824	1.938	0.746	1.014	0.44	264.877	133.297	154.321	202.682	184.194	196.913	1.711	1.515	1.618	1.023	0.571	0.048	140.272	149.045	134.383	88.946	86.973	96.843
BGIBMGA011839	tan	Toxin_hemocyte	no hints			NA	NA	NA	NA	NA	NA	NA	NA	NA	NA	NA	NA	1.28065	7.07732	5.92643e-13	5.89215e-11	53.842	60.818	70.789	65.954	68.294	75.321	69.327	61.339	71.53	14.45	18.058	17.38	162.82	152.245	148.894	57.143	63.678	60.671	37.713	41.11	38.219	12.256	15.5	13.67
BGIBMGA011840	tan	Toxin_hemocyte	gi|512928385|ref|XP_004931565.1| PREDICTED: rab11 family-interacting protein 4A-like [Bombyx mori]	1e-72	88.66	NA	NA	NA	NA	NA	NA	NA	NA	NA	NA	NA	NA	1.51893	6.18283	4.81967e-15	6.11876e-13	26.64	31.635	28.685	51.891	50.355	48.131	32.29	27.483	30.676	21.275	21.141	23.645	84.533	95.993	76.458	42.432	50.001	47.248	18.973	19.422	20.204	18.196	19.306	23.208
BGIBMGA011841	brown	Toxin_midgut	gi|512928796|ref|XP_004931667.1| PREDICTED: ubiquitin domain-containing protein UBFD1-like [Bombyx mori]	2e-167	100	NA	NA	NA	NA	1.14739	4.61707	5.97587e-05	0.00164155	NA	NA	NA	NA	NA	NA	NA	NA	64.977	33.291	70.181	95.998	44.325	99.827	11.073	15.648	13.661	27.133	26.124	15.702	56.478	25.25	48.358	39.951	89.165	93.322	19.343	15.302	35.646	59.884	56.345	32.919
BGIBMGA011395	blue	CK_midgut	gi|512925182|ref|XP_004930776.1| PREDICTED: putative fatty acyl-CoA reductase CG5065-like [Bombyx mori]	0	92.56	NA	NA	NA	NA	-1.02018	8.78048	6.67891e-15	1.29176e-12	NA	NA	NA	NA	NA	NA	NA	NA	0.907	0.835	0.793	2.317	2.131	1.687	4.517	3.857	4.146	868.839	914.62	926.004	1.766	1.117	1.393	2.1	2.856	1.73	2.789	4.979	3.923	466.303	435.356	417.406
BGIBMGA011866	purple	CK_hemocyte	gi|498970478|ref|XP_004526821.1| PREDICTED: uncharacterized protein LOC101452237 isoform X1 [Ceratitis capitata] gi|498970482|ref|XP_004526822.1| PREDICTED: uncharacterized protein LOC101452237 isoform X2 [Ceratitis capitata] gi|498970486|ref|XP_004526823.1| PREDICTED: uncharacterized protein LOC101452237 isoform X3 [Ceratitis capitata] gi|498970490|ref|XP_004526824.1| PREDICTED: uncharacterized …	2e-31	78.05	NA	NA	NA	NA	NA	NA	NA	NA	NA	NA	NA	NA	-1.35303	4.38878	0.000122756	0.00257103	17.117	20.646	23.635	7.395	4.501	7.532	25.228	29.27	24.827	24.766	29.561	28.422	7.089	11.72	6.111	6.925	7.023	6.438	25.909	24.727	21.099	27.987	29.966	33.189
BGIBMGA011899	black	CK_hemocyte,CK_cell,CK_fatbody,CK_midgut	gi|512897603|ref|XP_004924193.1| PREDICTED: histidine triad nucleotide-binding protein 3-like [Bombyx mori]	5e-93	95.71	-3.20433	4.37647	0.000276021	0.00344433	-4.26591	4.30715	0.00115304	0.0194092	-4.71703	6.00105	8.98173e-10	1.29621e-06	-3.31311	4.13479	0.00369904	0.0479945	4.09	0.89	55.992	7.141	117.49	119.694	8.629	7.957	86.442	156.589	3.806	2.546	0	5.109	1.086	2.057	2.535	4.964	2.147	4.02	3.745	2.24	1.671	5.029
BGIBMGA011917	salmon	CK_fatbody,Toxin_hemocyte	gi|512897548|ref|XP_004924180.1| PREDICTED: TATA element modulatory factor-like [Bombyx mori]	0	100	-1.128	4.17318	0.00238941	0.0211926	NA	NA	NA	NA	NA	NA	NA	NA	1.17329	5.22042	0.00129525	0.0202816	12.592	23.072	16.1	18.882	7.476	18.702	21.993	24.727	22.871	20.881	12.075	15.636	47.829	53.442	16.335	21.977	22.302	20.793	5.629	23.457	4.418	16.977	19.266	20.202
BGIBMGA011468	greenyellow	CK_midgut	gi|261245095|ref|NP_001159617.1| juvenile hormone epoxide hydrolase-like protein 1 [Bombyx mori] gi|255977192|dbj|BAH97088.1| juvenile hormone epoxide hydrolase-like protein 1 [Bombyx mori]	0	99.75	NA	NA	NA	NA	-1.58375	3.18375	0.000831149	0.0151186	NA	NA	NA	NA	NA	NA	NA	NA	0.443	0.171	0	0.121	0.061	0.284	1.508	1.618	1.603	14.492	16.874	16.298	0.518	0.737	0.932	0.073	0	0	0.785	0.563	0.92	4.812	5.093	4.873
BGIBMGA012004	purple	Toxin_hemocyte	gi|379698932|ref|NP_001243937.1| c-myc [Bombyx mori] gi|341925864|dbj|BAK53865.1| c-myc [Bombyx mori]	0	100	NA	NA	NA	NA	NA	NA	NA	NA	NA	NA	NA	NA	1.9484	4.85028	1.65493e-10	1.17728e-08	8.76	6.124	11.096	9.841	6.811	7.782	21.87	18.816	11.314	9.41	6.866	5.917	27.271	36.625	38.559	13.049	10.731	7.353	11.957	12.019	9.784	2.545	4.42	8.252
BGIBMGA012025	brown	CK_fatbody	gi|512934109|ref|XP_004932954.1| PREDICTED: p21-activated protein kinase-interacting protein 1-like [Bombyx mori]	0	100	-1.00469	5.13544	2.20746e-05	0.000397304	NA	NA	NA	NA	NA	NA	NA	NA	NA	NA	NA	NA	14.146	16.397	17.649	43.438	39.42	41.704	41.289	56.716	45.312	27.163	16.772	19.489	23.873	25.669	19.876	45.599	37.913	45.114	27.516	22.68	22.998	12.256	10.083	13.667
BGIBMGA012035	red	CK_hemocyte	gi|512934281|ref|XP_004932997.1| PREDICTED: ATP-binding cassette sub-family G member 1-like [Bombyx mori]	0	88.66	NA	NA	NA	NA	NA	NA	NA	NA	NA	NA	NA	NA	-1.37735	5.88991	9.78045e-12	8.4956e-10	66.912	64.5	66.089	0.229	0.699	0.364	34.982	31.064	32.976	0.492	0.8	0.498	28.341	21.658	27.28	1.074	1.654	0.993	28.577	34.636	33.929	0.964	0.866	0.293
BGIBMGA012037	brown	CK_fatbody	gi|512934057|ref|XP_004932941.1| PREDICTED: proline-, glutamic acid- and leucine-rich protein 1-like [Bombyx mori]	0	84.08	-1.02285	6.17624	4.85721e-07	1.31529e-05	NA	NA	NA	NA	NA	NA	NA	NA	NA	NA	NA	NA	42.756	41.084	45.26	103.481	105.864	112.704	103.793	105.531	99.835	65.056	63.393	56.728	41.716	44.007	42.829	115.431	109.248	110.125	48.18	55.294	53.858	34.383	31.766	35.425
BGIBMGA012059	brown	CK_fatbody	gi|512933926|ref|XP_004932911.1| PREDICTED: U3 small nucleolar RNA-associated protein 6 homolog [Bombyx mori]	0	99.01	-1.39733	5.05326	4.65214e-08	1.55423e-06	NA	NA	NA	NA	NA	NA	NA	NA	NA	NA	NA	NA	26.682	27.035	29.17	104.978	104.763	108.38	44.286	54.116	46.253	37.687	37.341	31.782	28.168	31.524	28.839	119.179	115.533	112.702	19.56	18.044	19.046	17.57	20.684	20.316
BGIBMGA012069	brown	CK_fatbody	gi|512933907|ref|XP_004932907.1| PREDICTED: serine/threonine-protein kinase RIO1-like isoform X2 [Bombyx mori]	0	97.7	-1.29527	3.94978	0.000926263	0.0095522	NA	NA	NA	NA	NA	NA	NA	NA	NA	NA	NA	NA	5.966	12.509	11.447	27.184	26.868	25.569	15.084	23.482	20.748	17.901	24.193	17.389	7.887	13.134	12.001	31.136	27.577	29.617	8.227	6.661	10.49	15.986	8.704	7.35
BGIBMGA012080	tan	Toxin_fatbody	gi|512934188|ref|XP_004932973.1| PREDICTED: TBC1 domain family member 12-like [Bombyx mori]	8e-49	94.74	1.3121	4.59263	2.78964e-06	6.35657e-05	NA	NA	NA	NA	NA	NA	NA	NA	NA	NA	NA	NA	128.86	142.936	118.074	132.522	138.638	188.77	13.639	13.821	17.013	10.895	15.086	10.602	130.73	118.733	117.972	194.928	150.624	164.535	38.973	40.7	35.028	26.23	27.783	18.202
BGIBMGA012081	red	Toxin_fatbody	gi|512934188|ref|XP_004932973.1| PREDICTED: TBC1 domain family member 12-like [Bombyx mori]	0	76.14	1.12254	4.74418	1.6732e-05	0.000311883	NA	NA	NA	NA	NA	NA	NA	NA	NA	NA	NA	NA	130.704	138.664	138.745	171.907	168.348	170.458	20.507	17.116	17.593	11.826	13.522	11.704	149.792	165.959	162.102	174.748	189.27	183.609	42.49	37.213	46.369	18.985	21.707	15.011
BGIBMGA012089	turquoise	CK_midgut	gi|160358393|ref|NP_001104007.1| cytochrome P450, family 6, subfamily ab, polypeptide 5 [Bombyx mori] gi|147575217|gb|ABQ45551.1| cytochrome P450 [Bombyx mori]	0	98.05	NA	NA	NA	NA	-1.98588	2.88414	0.00227273	0.0331874	NA	NA	NA	NA	NA	NA	NA	NA	0	0	0	0.094	0	0.098	0.099	1.596	0	6.464	21.032	11.909	0	0	0	0	1.313	0	0	1.17	0	0	1.37	7.05
BGIBMGA012120	brown	Toxin_hemocyte	gi|512934065|ref|XP_004932943.1| PREDICTED: arf-GAP with dual PH domain-containing protein 1-like [Bombyx mori]	0	100	NA	NA	NA	NA	NA	NA	NA	NA	NA	NA	NA	NA	1.55896	6.83415	7.31888e-17	1.0981e-14	40.528	46.618	49.305	21.339	20.558	24.929	9.668	6.535	9.277	27.192	26.239	24.339	146.691	129.827	134.244	25.191	26.27	29.836	15.153	14.838	13.116	36.584	38.755	44.528
BGIBMGA012122	black	Toxin_cell	gi|512934081|ref|XP_004932947.1| PREDICTED: esterase FE4-like [Bombyx mori]	0	100	NA	NA	NA	NA	NA	NA	NA	NA	4.56269	4.51491	0.000182942	0.0465911	NA	NA	NA	NA	12.721	15.515	16.586	0.951	0.897	1.663	0.462	55.627	1.904	62.045	57.97	2.29	13.056	17.259	17.448	0.663	1.604	74.138	31.034	31.354	29.897	40.773	44.167	40.225
BGIBMGA012125	magenta	CK_hemocyte	gi|389613457|dbj|BAM20075.1| unknown protein, partial [Papilio xuthus]	2e-56	52.31	NA	NA	NA	NA	NA	NA	NA	NA	NA	NA	NA	NA	-7.22306	4.09192	0.000119696	0.00253264	0	62.684	0	0	0	0	0	0	0	0	0	0	0	0	0	0	0	0	0	0	0	0	0	0
BGIBMGA012132	purple	Toxin_fatbody	gi|512934129|ref|XP_004932959.1| PREDICTED: sodium-coupled monocarboxylate transporter 2-like [Bombyx mori]	0	87.58	2.59984	3.55643	1.05947e-08	3.98521e-07	NA	NA	NA	NA	NA	NA	NA	NA	NA	NA	NA	NA	0	0	0	0	0.218	0	2.566	4.522	3.264	6.743	5.846	8.218	0	0	0	0.135	0	0.157	22.095	20.24	21.433	7.991	6.793	6.256
BGIBMGA012133	turquoise	CK_fatbody	gi|607303027|gb|EZA44919.1| conserved uncharacterized protein family 12 [Microplitis demolitor]	1e-38	39.63	-1.63122	4.89195	5.49003e-09	2.22365e-07	NA	NA	NA	NA	NA	NA	NA	NA	NA	NA	NA	NA	11.026	10.477	12.715	0	0.147	0.144	40.077	51.46	40.984	53.921	51.328	42.355	8.914	6.278	7.929	0	0.485	0	13.314	15.234	14.099	38.844	40.538	48.67
BGIBMGA012137	magenta	Toxin_fatbody	gi|512901561|ref|XP_004925165.1| PREDICTED: major facilitator superfamily domain-containing protein 6-like [Bombyx mori]	0	94.67	1.92219	5.69567	1.57657e-19	1.66527e-17	NA	NA	NA	NA	NA	NA	NA	NA	NA	NA	NA	NA	6.997	9.407	9.49	1.426	1.539	2.299	23.414	24.488	27.376	55.932	58.422	58.421	8.094	7.462	8.242	1.502	1.939	2.349	99.276	95.463	99.349	79.082	80.781	78.807
BGIBMGA012140	cyan	CK_midgut	gi|512901429|ref|XP_004925133.1| PREDICTED: coiled-coil domain-containing protein 132-like [Bombyx mori]	0	100	NA	NA	NA	NA	-4.79794	1.82807	0.001956	0.0295646	NA	NA	NA	NA	NA	NA	NA	NA	0.841	4.97	5.239	1.531	2.694	0.486	0.318	2.138	6.485	4.839	5.809	3.013	0.571	0.542	1.092	1.597	1.676	1.396	4.288	5.094	0.314	0.303	0.161	0.196
BGIBMGA012214	red	Toxin_fatbody,Toxin_midgut	gi|512939985|ref|XP_004934364.1| PREDICTED: E3 ubiquitin-protein ligase RNF12-like [Bombyx mori]	2e-32	90.32	1.04196	3.86228	0.00431348	0.0345375	1.33314	3.33572	0.00151037	0.0241787	NA	NA	NA	NA	NA	NA	NA	NA	20.929	17.17	16.972	19.049	18.63	14.683	13.217	8.631	6.785	4.937	11.58	5.468	22.45	23.025	23.094	20.205	22.599	17.961	17.446	23.132	19.944	21.931	16.773	17.259
BGIBMGA012216	purple	Toxin_fatbody	gi|389620198|gb|AFK93534.1| hemolymph protein 14 [Bombyx mori]	3e-41	92.31	8.46023	4.69611	4.69859e-06	0.000101305	NA	NA	NA	NA	NA	NA	NA	NA	NA	NA	NA	NA	0	0	0	0	0	0	0	0	0	0	0	0	0	0	0	0	0	0	172.965	0	0	0	0	2.661
BGIBMGA012221	red	Toxin_fatbody	gi|512911580|ref|XP_004927448.1| PREDICTED: melanotransferrin-like [Bombyx mori]	0	99.73	1.51449	4.61886	4.00084e-08	1.35394e-06	NA	NA	NA	NA	NA	NA	NA	NA	NA	NA	NA	NA	0.12	0	0.092	0.312	0.098	0.066	13.929	12.35	14.863	1798.08	1985.96	2022.48	0.311	0.105	0.005	0.263	0.328	0.135	42.082	41.502	40.106	2181.64	2099.09	1919.38
BGIBMGA012268	brown	Toxin_hemocyte	gi|512934934|ref|XP_004933152.1| PREDICTED: L-galactose dehydrogenase-like isoform X1 [Bombyx mori]	0	98.69	NA	NA	NA	NA	NA	NA	NA	NA	NA	NA	NA	NA	1.77114	7.87664	6.12354e-27	1.87153e-24	74.422	79.274	99.996	81.496	93.555	95.217	104.893	97.38	100.222	88.795	95.324	82.381	286.505	299.671	300.474	107.257	101.87	87.35	101.378	92.505	86.217	72.828	79.277	87.793
BGIBMGA012269	turquoise	Toxin_hemocyte	gi|512935166|ref|XP_004933208.1| PREDICTED: SH2 domain-containing protein 3C-like [Bombyx mori]	0	100	NA	NA	NA	NA	NA	NA	NA	NA	NA	NA	NA	NA	2.13402	3.56217	0.000117161	0.00249178	3.469	2.17	2.245	0.588	0.012	0.253	1.443	1.242	1.151	1.455	1.75	1.742	13.409	10.646	12.587	0.088	0.508	0.197	1.815	2.072	1.164	3.638	3.939	3.254
BGIBMGA012280	purple	Toxin_hemocyte	gi|512934891|ref|XP_004933142.1| PREDICTED: neuronal calcium sensor 2-like [Bombyx mori]	2e-90	100	NA	NA	NA	NA	NA	NA	NA	NA	NA	NA	NA	NA	1.77598	4.02625	4.77869e-05	0.00115641	4.4	5.008	4.972	29.023	43.649	39.668	13.967	9.31	14.389	38.3	39.105	34.046	14.455	16.92	21.774	34.204	27.125	36.966	23.89	20.753	25.355	41.336	38.905	43.345
BGIBMGA012282	magenta	Toxin_hemocyte	gi|512934895|ref|XP_004933143.1| PREDICTED: neurocalcin homolog isoform X1 [Bombyx mori] gi|512934899|ref|XP_004933144.1| PREDICTED: neurocalcin homolog isoform X2 [Bombyx mori]	9e-129	79.17	NA	NA	NA	NA	NA	NA	NA	NA	NA	NA	NA	NA	1.23776	4.712	4.72523e-05	0.00115022	10.1	12.06	11.948	24.418	23.281	26.095	37.045	37.228	34.5	36.259	27.109	33.569	25.052	26.169	30.485	20.912	24.462	20.583	41.852	35.59	33.364	40.968	34.439	33.079
BGIBMGA011508	blue	CK_fatbody	gi|170039755|ref|XP_001847689.1| T-complex protein 1 subunit theta [Culex quinquefasciatus] gi|167863368|gb|EDS26751.1| T-complex protein 1 subunit theta [Culex quinquefasciatus]	4e-175	73.62	-1.1376	7.36253	2.30525e-12	1.50663e-10	NA	NA	NA	NA	NA	NA	NA	NA	NA	NA	NA	NA	117.294	138.183	150.781	769.981	791.278	794.089	252.648	256.221	233.473	338.51	300.669	292.287	166.735	186.309	166.056	818.223	806.472	814.661	116.91	118.062	112.95	198.99	201.316	203.258
BGIBMGA012307	cyan	Toxin_midgut	gi|512935130|ref|XP_004933199.1| PREDICTED: autophagy-related protein 9A-like [Bombyx mori]	0	99.08	NA	NA	NA	NA	1.3315	4.43776	5.72783e-07	2.91842e-05	NA	NA	NA	NA	NA	NA	NA	NA	22.794	22.835	24.838	29.147	26.743	27.404	44.206	38.096	45.833	16.087	18.716	17.795	20.588	21.433	20.746	30.851	32.826	33.561	76.227	80.599	71.035	45.267	45.222	44.756
BGIBMGA012311	turquoise	CK_fatbody	no hints			-4.581	2.04079	0.00589695	0.0448795	NA	NA	NA	NA	NA	NA	NA	NA	NA	NA	NA	NA	0	0	0	1.947	0	0	0	3.462	7.899	9.498	3.143	0	0	0	0	0	0	0	0	0	0	0	0	4.833
BGIBMGA011595	blue	Toxin_fatbody	gi|114052999|ref|NP_001040333.1| 4-nitrophenylphosphatase [Bombyx mori] gi|95102544|gb|ABF51208.1| 4-nitrophenylphosphatase [Bombyx mori]	6e-175	84.8	1.00045	4.13632	0.00267725	0.0233495	NA	NA	NA	NA	NA	NA	NA	NA	NA	NA	NA	NA	23.201	19.249	21.105	0.354	0.713	0.362	13.336	12.579	9.403	94.231	81.943	82.983	17.971	20.626	18.333	0.405	0.526	0.181	25.592	22.926	28.04	51.914	45.934	52.383
BGIBMGA012379	purple	Toxin_hemocyte	gi|357623596|gb|EHJ74684.1| putative fibrillin 2 [Danaus plexippus]	2e-101	69.33	NA	NA	NA	NA	NA	NA	NA	NA	NA	NA	NA	NA	1.08476	6.96944	1.40139e-09	8.2602e-08	67.047	66.378	56.895	0.255	0	0.306	132.991	92.68	128.976	14.048	13.719	15.572	140.229	145.196	126.785	0	3.083	0.123	163.917	154.219	147.249	20.675	17.629	10.57
BGIBMGA011598	greenyellow	CK_midgut	gi|385271678|gb|AFI57049.1| MG7, partial [Choristoneura fumiferana] gi|385271680|gb|AFI57050.1| MG7, partial [Helicoverpa armigera]	7e-34	56.36	NA	NA	NA	NA	-4.07444	4.67039	3.4313e-28	2.50142e-25	NA	NA	NA	NA	NA	NA	NA	NA	0	0	0	5.15	0.043	4.878	0	0.766	0	53.749	73.909	65.599	0	0	0	0.081	0.081	2.989	0.091	0	2.177	3.866	2.783	4.935
BGIBMGA011601	blue	Toxin_fatbody	gi|512928590|ref|XP_004931615.1| PREDICTED: alanine--glyoxylate aminotransferase 2, mitochondrial-like [Bombyx mori]	0	94.64	3.35075	2.91897	8.77331e-07	2.23218e-05	NA	NA	NA	NA	NA	NA	NA	NA	NA	NA	NA	NA	0.506	0.396	0.301	0.406	0.475	0.191	1.014	0.947	1.208	5.501	5.125	3.593	0.185	0.121	0.155	0.452	0.521	0.507	12.619	13.031	13.418	6.778	9.913	7.747
BGIBMGA012399	purple	Toxin_fatbody	gi|112983008|ref|NP_001037592.1| sorbitol dehydrogenase [Bombyx mori] gi|108860581|dbj|BAE95831.1| sorbitol dehydrogenase-2 [Bombyx mori]	0	93.79	1.28677	5.19673	5.22767e-09	2.13538e-07	NA	NA	NA	NA	NA	NA	NA	NA	NA	NA	NA	NA	31.257	36.659	29.281	3.903	3.714	4.379	20.971	22.968	27.215	82.312	95.825	90.503	20.274	18.022	19.36	3.422	3.273	2.714	60.394	62.498	57.98	116.324	126.75	105.555
BGIBMGA012408	turquoise	CK_midgut	gi|512903579|ref|XP_004925654.1| PREDICTED: mucin-2-like [Bombyx mori]	0	100	NA	NA	NA	NA	-3.05174	2.00508	0.00342419	0.0458348	NA	NA	NA	NA	NA	NA	NA	NA	0	0.093	0	0.066	0.119	0.068	0.396	0.279	0.58	6.661	4.109	6.778	0	0.196	0	0	0	0	0.67	0.641	0.299	1.01	0.346	0
BGIBMGA011609	blue	Toxin_fatbody	gi|112984204|ref|NP_001037450.1| beta-1,3-glucan recognition protein 2 precursor [Bombyx mori] gi|1209253|gb|AAB40946.1| p50 protein [Bombyx mori]	0	99.3	2.58782	3.66948	2.47821e-09	1.07977e-07	NA	NA	NA	NA	NA	NA	NA	NA	NA	NA	NA	NA	6.722	9.722	8.473	0.036	0.023	0.092	2.841	3.99	3.062	0.641	0.718	0.627	16.943	17.355	17.674	0.116	0.132	0.01	23.624	24.245	22.835	2.304	1.426	1.343
BGIBMGA012460	purple	Toxin_fatbody	gi|512896982|ref|XP_004924041.1| PREDICTED: uncharacterized protein LOC101745027 isoform X2 [Bombyx mori]	2e-120	100	1.27735	5.45833	2.13549e-09	9.50246e-08	NA	NA	NA	NA	NA	NA	NA	NA	NA	NA	NA	NA	3.388	1.18	3.054	16.671	16.636	16.095	31.537	26.967	27.888	66.128	64.76	61.461	3.034	2.293	2.95	17.964	17.817	14.968	79.003	76.148	59.472	54.284	53.169	56.74
BGIBMGA012491	brown	CK_fatbody	gi|512896871|ref|XP_004924015.1| PREDICTED: fatty-acid amide hydrolase 2-like isoform X1 [Bombyx mori]	0	100	-1.41235	3.9482	0.000363273	0.00434143	NA	NA	NA	NA	NA	NA	NA	NA	NA	NA	NA	NA	3.302	2.831	3.124	0.307	0.308	0.27	18.313	21.896	21.406	27.435	25.995	22.888	1.67	3.716	1.695	0.42	0.594	0.258	8.192	7.055	6.903	26.339	20.032	23.631
BGIBMGA012494	magenta	Toxin_fatbody	gi|512896883|ref|XP_004924018.1| PREDICTED: uncharacterized protein LOC101741905 isoform X1 [Bombyx mori]	4e-51	100	1.21683	4.74516	3.07053e-06	6.9499e-05	NA	NA	NA	NA	NA	NA	NA	NA	NA	NA	NA	NA	0	1.466	1.644	0	0.256	0.018	16.521	16.621	19.55	303.812	290.122	296.84	0	1.567	0	0	0	0	41.923	40.955	43.678	244.939	260.869	264.89
BGIBMGA012502	magenta	CK_midgut	gi|512896938|ref|XP_004924031.1| PREDICTED: LOW QUALITY PROTEIN: putative sodium-dependent multivitamin transporter-like [Bombyx mori]	8e-147	95.54	NA	NA	NA	NA	-1.2709	4.72891	3.36973e-07	1.84875e-05	NA	NA	NA	NA	NA	NA	NA	NA	7.238	5.056	6.576	0.041	0.248	0.513	56.979	57.089	59.243	53.254	50.971	53.13	5.91	4.156	4.564	0.266	1.168	0.521	48.088	50.365	48.656	23.188	22.928	19.471
BGIBMGA011695	blue	CK_fatbody	gi|512928645|ref|XP_004931629.1| PREDICTED: LOW QUALITY PROTEIN: nucleoprotein TPR-like [Bombyx mori]	0	92.99	-1.12486	5.97158	3.46195e-07	9.67957e-06	NA	NA	NA	NA	NA	NA	NA	NA	NA	NA	NA	NA	97.301	91.925	92.552	132.541	137.268	134.554	84.141	101.201	86.385	72.877	71.877	70.436	96.583	100.967	100.255	150.439	144.067	135.941	43.23	43.397	43.178	41.394	43.781	49.231
BGIBMGA012523	green	Toxin_fatbody	gi|512901837|ref|XP_004925230.1| PREDICTED: activating signal cointegrator 1 complex subunit 2 homolog isoform X3 [Bombyx mori]	3e-103	73.62	2.58716	3.9831	1.42117e-11	8.54092e-10	NA	NA	NA	NA	NA	NA	NA	NA	NA	NA	NA	NA	0.159	0.021	0.226	0	0	0	3.827	5.575	5.603	104.029	95.439	109.201	0	0.143	0.278	0	0.175	0.153	31.256	31.15	28.925	137.129	126.536	105.295
BGIBMGA011774	pink	Toxin_fatbody	gi|512927984|ref|XP_004931470.1| PREDICTED: purine nucleoside phosphorylase-like isoform X2 [Bombyx mori]	0	100	1.80293	7.68685	2.60405e-31	4.25478e-29	NA	NA	NA	NA	NA	NA	NA	NA	NA	NA	NA	NA	1.369	1.505	3.199	1.026	1.196	0.851	109.92	104.239	102.208	318.338	308.902	285.029	1.639	1.647	2.213	0.992	1.338	1.21	392.714	370.424	379.506	465.34	475.283	507.615
BGIBMGA011848	blue	CK_fatbody	gi|512928449|ref|XP_004931581.1| PREDICTED: regulation of nuclear pre-mRNA domain-containing protein 1B-like [Bombyx mori]	0	100	-1.02712	5.56683	1.66581e-06	4.05101e-05	NA	NA	NA	NA	NA	NA	NA	NA	NA	NA	NA	NA	45.893	46.089	49.978	47.312	48.15	53.194	68.605	68.522	60.7	53.321	53.977	59.213	41.581	40.768	44.984	52.73	48.559	43.863	32.209	36.573	31.643	25.325	23.795	32.864
BGIBMGA012559	brown	CK_hemocyte,Toxin_midgut	gi|512901721|ref|XP_004925204.1| PREDICTED: U3 small nucleolar RNA-associated protein 18 homolog [Bombyx mori]	0	100	NA	NA	NA	NA	3.1562	4.14355	2.28619e-05	0.000741993	NA	NA	NA	NA	-2.55179	4.24362	0.00203535	0.0291087	1.49	50.883	10.1	1.354	6.971	2.322	16.584	8.352	8.692	6.243	4.963	5.376	3.998	2.059	4.67	6.188	4.975	5.541	8.094	13.275	13.978	68.642	3.414	73.265
BGIBMGA012587	green	Toxin_fatbody	gi|512906561|ref|XP_004926227.1| PREDICTED: solute carrier family 22 member 5-like [Bombyx mori]	0	99.74	2.80745	2.29131	0.000979086	0.00999834	NA	NA	NA	NA	NA	NA	NA	NA	NA	NA	NA	NA	0	0	0	0.113	0	0	0.674	0.562	0.285	2.773	4.655	3.978	0.036	0	0	0.074	0	0	5.265	7.563	5.253	2.38	5.085	4.927
BGIBMGA012588	turquoise	Toxin_fatbody	gi|512906479|ref|XP_004926206.1| PREDICTED: tafazzin homolog [Bombyx mori]	0	100	1.47545	5.01421	5.75572e-10	2.77362e-08	NA	NA	NA	NA	NA	NA	NA	NA	NA	NA	NA	NA	26.304	25.373	21.924	8.978	8.151	10.055	20.202	19.932	17.781	16.691	18.803	18.626	31.214	29.279	28.718	8.309	9.468	8.178	54.184	55.067	55.82	22.392	19.792	21.656
BGIBMGA012598	tan	CK_fatbody	gi|512906534|ref|XP_004926220.1| PREDICTED: zinc finger BED domain-containing protein 4-like [Bombyx mori]	0	100	-4.5827	2.04095	0.00429114	0.034385	NA	NA	NA	NA	NA	NA	NA	NA	NA	NA	NA	NA	2.661	2.292	0	0	0	0	0	6.977	4.055	0.966	1.838	1.575	0	0	2.519	0	0	0	0	0	0	1.016	1.249	0.347
BGIBMGA011966	pink	CK_fatbody	gi|512897476|ref|XP_004924162.1| PREDICTED: threonylcarbamoyladenosine tRNA methylthiotransferase-like [Bombyx mori]	0	100	-1.04904	4.69891	0.000185181	0.00246366	NA	NA	NA	NA	NA	NA	NA	NA	NA	NA	NA	NA	24.735	20.715	19.44	47.531	47.579	49.05	36.239	32.424	35.238	19.111	18.94	21.337	23.575	21.331	20.142	44.432	44.637	47.204	18.892	14.737	16.306	19.234	13.875	15.373
BGIBMGA012680	brown	Toxin_fatbody	gi|512900044|ref|XP_004924796.1| PREDICTED: four and a half LIM domains protein 2-like isoform X3 [Bombyx mori]	2e-119	98.28	1.35285	6.24178	5.11818e-12	3.24543e-10	NA	NA	NA	NA	NA	NA	NA	NA	NA	NA	NA	NA	38.257	45.965	41.299	31.984	28.868	30.71	43.247	46.683	55.394	608.587	662.729	706.586	33.66	24.697	27.721	26.887	25.462	28.913	131.983	125.002	127.128	925.035	1005.58	880.391
BGIBMGA012702	magenta	CK_midgut	gi|512900028|ref|XP_004924792.1| PREDICTED: elongation of very long chain fatty acids protein 6-like [Bombyx mori]	2e-141	100	NA	NA	NA	NA	-1.61677	7.06165	4.03308e-05	0.00118247	NA	NA	NA	NA	NA	NA	NA	NA	12.39	16.244	0.269	46.251	46.881	1.474	0.29	59.254	73.188	151.437	565.749	186.653	2.348	1.568	21.647	35.19	38.499	0.176	0	1.393	60.543	93.987	103.532	91.211
BGIBMGA012803	salmon	Toxin_fatbody	gi|557755180|ref|XP_005177331.1| PREDICTED: cell wall integrity and stress response component 2-like isoform X1 [Musca domestica]	2e-17	71.67	2.20124	5.16592	1.63443e-20	1.81821e-18	NA	NA	NA	NA	NA	NA	NA	NA	NA	NA	NA	NA	113.186	118.679	112.961	0.714	0.792	0.649	12.787	14.978	15.213	1.209	1.478	1.908	75.395	84.046	77.988	0.917	0.757	1.172	71.112	72.2	66.316	2.237	2.781	2.513
BGIBMGA012806	salmon	Toxin_fatbody	gi|512917758|ref|XP_004928966.1| PREDICTED: carboxypeptidase D-like [Bombyx mori]	0	100	1.57653	5.73671	3.94531e-05	0.000648681	NA	NA	NA	NA	NA	NA	NA	NA	NA	NA	NA	NA	111.42	35.902	33.712	11.76	12.933	9.205	35.331	26.33	28.391	10.238	9.067	11.696	23.842	39.589	34.175	10.033	11.665	10.765	168.102	53.648	54.005	9.665	13.908	14
BGIBMGA012812	red	CK_hemocyte	gi|290563184|ref|NP_001166854.1| sex-lethal isoform S [Bombyx mori] gi|89885657|dbj|BAE86939.1| sex-lethal [Bombyx mori]	2e-56	100	NA	NA	NA	NA	NA	NA	NA	NA	NA	NA	NA	NA	-5.88262	2.87842	0.00287456	0.0390789	25.428	0	0	0	0	0	0	0	0	0	0	0	0	0	0	0	0	0	0	0	0	0	0	0
BGIBMGA012298	pink	CK_fatbody	gi|114053253|ref|NP_001040525.1| 6-phosphogluconate dehydrogenase [Bombyx mori] gi|95102844|gb|ABF51363.1| 6-phosphogluconate dehydrogenase [Bombyx mori]	0	93.58	-1.1078	8.87295	3.60367e-17	3.42578e-15	NA	NA	NA	NA	NA	NA	NA	NA	NA	NA	NA	NA	102.553	137.924	138.677	296.21	309.512	305.446	718.489	718.837	704.794	261.737	250.138	259.963	144.716	148.462	137.555	311.816	311.738	325.011	349.425	346.986	330.849	167.214	162.961	166.854
BGIBMGA012864	turquoise	Toxin_hemocyte,Toxin_fatbody	gi|379698954|ref|NP_001243949.1| peptidoglycan recognition protein precursor [Bombyx mori] gi|355398229|gb|AER70118.1| peptidoglycan recognition protein [Bombyx mori]	3e-38	100	6.20324	6.39848	8.88226e-88	3.71527e-85	NA	NA	NA	NA	NA	NA	NA	NA	1.12859	4.98511	3.91601e-05	0.000967513	15.85	14.53	13.326	0.067	0	0.188	2.15	3.26	2.097	397.328	387.104	366.432	34.006	27.955	36.175	0	0.417	0	212.173	207.557	201.125	592.563	556.565	623.732
BGIBMGA012865	tan	Toxin_midgut	gi|512917408|ref|XP_004928879.1| PREDICTED: peptidoglycan-recognition protein LB-like [Bombyx mori]	3e-37	98.39	NA	NA	NA	NA	7.19232	3.35387	0.000108033	0.00266623	NA	NA	NA	NA	NA	NA	NA	NA	0	0	0	0	0	0	0	0	0	0	0	0	0	0	0	0	0	0	0	0	0	0	76.566	0
BGIBMGA012866	yellow	Toxin_hemocyte,Toxin_fatbody,Toxin_midgut	gi|112983866|ref|NP_001036858.1| peptidoglycan recognition protein S6 precursor [Bombyx mori] gi|13359090|dbj|BAB33294.1| Bacteriophage T7 lysozyme-like protein 1 (BTL-LP1) [Bombyx mori]	2e-88	98.44	3.31238	9.23322	5.25699e-15	4.22865e-13	4.79254	3.42896	2.19287e-16	4.72315e-14	NA	NA	NA	NA	2.28444	4.63439	0.000100579	0.00218416	6.836	7.96	2.714	0	0	0	73.654	61.462	244.867	0.605	1.648	1.788	12.157	17.917	61.052	0	0	0	1316.23	1314.99	1261.72	28.416	32.06	25.773
BGIBMGA012390	pink	CK_fatbody,Toxin_midgut	gi|512902747|ref|XP_004925450.1| PREDICTED: chondroitin sulfate synthase 1-like [Bombyx mori]	0	98.47	-6.29087	3.09544	0.00133312	0.0130528	9.11617	5.06398	4.94148e-11	5.57505e-09	NA	NA	NA	NA	NA	NA	NA	NA	0	0	0	0	0	0	0	0	36.786	0	0	0	0	0	0	1.034	1.127	0	0	0	0	0	152.753	138.252
BGIBMGA012521	blue	CK_fatbody,CK_midgut	gi|512911868|ref|XP_004927517.1| PREDICTED: venom allergen 5-like [Bombyx mori]	0	100	-2.021	4.29332	2.17159e-08	7.59477e-07	-2.25908	3.2285	9.38189e-06	0.00034329	NA	NA	NA	NA	NA	NA	NA	NA	0	0	0	0	0.158	0	26.409	30.124	30.287	14.067	19.398	21.111	0	0	0	0	0.061	0	8.434	6.216	7.59	3.397	3.536	2.495
BGIBMGA012968	green	Toxin_fatbody	gi|306518642|ref|NP_001182383.1| Bm8 interacting protein 2d-4 precursor [Bombyx mori] gi|296040408|dbj|BAJ07616.1| Bm8 interacting protein 2d-4 [Bombyx mori]	0	99.34	1.29277	3.34816	0.00543353	0.0419324	NA	NA	NA	NA	NA	NA	NA	NA	NA	NA	NA	NA	1.575	1.455	0.548	0	0.054	0.034	6.212	4.242	5.279	7.475	5.872	6.08	0.957	1.112	0.835	0.392	0.287	0.279	15.727	12.802	15.15	5.041	7.206	5.683
BGIBMGA012970	turquoise	CK_hemocyte	gi|189238480|ref|XP_968974.2| PREDICTED: similar to RUN and TBC1 domain containing 2 [Tribolium castaneum]	1e-32	83.33	NA	NA	NA	NA	NA	NA	NA	NA	NA	NA	NA	NA	-5.38115	6.15743	5.12408e-05	0.00122562	0.975	1.425	305.174	7.139	0.207	0.174	1.777	0.44	1.811	1.028	0.034	0.139	3.011	1.747	1.968	0	9.943	5.041	3.398	1.836	0.705	0.682	0.526	0.552
BGIBMGA012526	blue	CK_fatbody	gi|512901813|ref|XP_004925227.1| PREDICTED: alanine--glyoxylate aminotransferase 2-like [Bombyx mori]	0	100	-1.58334	8.7319	3.40482e-30	5.16003e-28	NA	NA	NA	NA	NA	NA	NA	NA	NA	NA	NA	NA	3.673	3.863	3.984	11.439	12.666	12.719	693.435	707.646	719.495	955.207	927.92	910.835	4.089	4.009	5.781	9.909	9.026	10.349	241.569	244.861	245.013	675.967	665.11	677.119
BGIBMGA013028	yellow	CK_fatbody	gi|512918243|ref|XP_004929085.1| PREDICTED: phagocyte signaling-impaired protein-like [Bombyx mori]	0	91.79	-1.06702	4.78819	0.000108264	0.00156587	NA	NA	NA	NA	NA	NA	NA	NA	NA	NA	NA	NA	13.624	13.711	15.944	16.032	15.123	17.405	34.805	37.606	38.952	18.131	19.248	17.264	13.757	20.023	17.367	17.259	17.131	17.184	17.919	17.988	18.346	9.509	11.472	9.579
BGIBMGA013050	magenta	CK_hemocyte	gi|512917702|ref|XP_004928952.1| PREDICTED: uncharacterized protein LOC101746057 isoform X1 [Bombyx mori] gi|512917706|ref|XP_004928953.1| PREDICTED: uncharacterized protein LOC101746057 isoform X2 [Bombyx mori]	5e-114	88.89	NA	NA	NA	NA	NA	NA	NA	NA	NA	NA	NA	NA	-1.23267	6.47807	1.25801e-10	9.1868e-09	87.06	105.891	98.461	0.184	0	0.194	1.577	1.055	1.088	1.017	0.169	0.45	43.62	42.007	40.795	0	0.102	0.173	1.749	1.674	3.187	0	0	0.197
BGIBMGA013059	brown	Toxin_fatbody	gi|357631758|gb|EHJ79227.1| putative Rho GTPase activating protein 15 [Danaus plexippus]	5e-113	57.52	1.05564	5.66329	3.36474e-07	9.45837e-06	NA	NA	NA	NA	NA	NA	NA	NA	NA	NA	NA	NA	33.436	20.086	20.132	4.864	4.698	4.499	41.119	29.312	39.872	6.082	6.012	5.578	37.139	45.678	36.074	4.131	6.557	6.992	80.339	78.243	80.186	9.028	6.666	8.074
BGIBMGA013100	turquoise	CK_fatbody,CK_midgut	gi|512918012|ref|XP_004929027.1| PREDICTED: small nuclear ribonucleoprotein Sm D3-like [Bombyx mori]	4e-89	100	-1.03455	4.11348	0.00509676	0.0398928	-2.53741	2.82513	6.67452e-05	0.00177644	NA	NA	NA	NA	NA	NA	NA	NA	5.044	6.453	10.883	23.137	19.629	29.38	13.515	28.798	24.467	15.519	10.729	13.919	3.988	8.747	7.388	30.911	27.015	26.923	12.905	10.213	8.694	1.823	3.069	1.383
BGIBMGA013112	yellow	CK_fatbody	gi|512909378|ref|XP_004926906.1| PREDICTED: DNA polymerase V-like [Bombyx mori]	0	100	-1.03782	6.86399	7.6308e-09	2.96637e-07	NA	NA	NA	NA	NA	NA	NA	NA	NA	NA	NA	NA	68.34	71.757	78.218	137.614	142.007	144.911	165.249	184.356	159.028	142.263	128.93	130.416	88.931	88.024	89.718	159.925	152.104	149.666	84.731	82.061	88.028	77.205	69.414	82.25
BGIBMGA013119	magenta	CK_hemocyte	gi|512909324|ref|XP_004926893.1| PREDICTED: signal peptide peptidase-like 3-like [Bombyx mori]	0	96.5	NA	NA	NA	NA	NA	NA	NA	NA	NA	NA	NA	NA	-1.18651	6.74016	2.7546e-10	1.84881e-08	114.759	124.04	110.85	16.16	18.413	16.182	90.65	76.317	95.314	8.815	8.423	12.153	53.982	47.78	54.088	12.695	15.296	11.945	77.673	65.977	83.985	10.039	8.6	6.98
BGIBMGA012548	blue	Toxin_fatbody	gi|512901857|ref|XP_004925235.1| PREDICTED: sphingomyelin phosphodiesterase-like [Bombyx mori]	0	100	2.55176	2.17483	0.00635717	0.0478251	NA	NA	NA	NA	NA	NA	NA	NA	NA	NA	NA	NA	0.271	0.105	0.471	0.529	0.825	0.802	1.183	0.864	0.478	383.533	378.146	362.624	0.473	0.798	0.695	0.745	0.81	0.216	6.114	5.099	5.255	569.795	562.796	604.542
BGIBMGA013182	tan	Toxin_midgut	no hints			NA	NA	NA	NA	6.78003	2.9838	4.86374e-07	2.56076e-05	NA	NA	NA	NA	NA	NA	NA	NA	0.692	1.535	0.954	12.339	12.573	10.84	1.683	1.472	1.667	0.339	0	0.349	1.645	0.945	0.229	12.92	10.046	12.795	2.24	0.846	2.179	0.437	29.78	26.378
BGIBMGA013198	red	Toxin_fatbody	gi|512891808|ref|XP_004922774.1| PREDICTED: LOW QUALITY PROTEIN: homeobox protein cut-like [Bombyx mori]	8e-157	100	3.66505	2.76542	8.11994e-07	2.08113e-05	NA	NA	NA	NA	NA	NA	NA	NA	NA	NA	NA	NA	0	1.588	0.189	8.649	9.453	6.736	0.847	0.709	0	0.234	0	0	0.216	28.39	1.679	5.109	0	8.968	11.179	14.089	8.719	2.412	0.368	0.399
BGIBMGA013200	magenta	CK_fatbody	gi|512891592|ref|XP_004922723.1| PREDICTED: GPN-loop GTPase 3-like [Bombyx mori]	2e-160	83.15	-1.00041	5.31912	8.09088e-06	0.000163333	NA	NA	NA	NA	NA	NA	NA	NA	NA	NA	NA	NA	38.541	37.545	40.378	37.793	40.524	40.84	61.32	52.676	51.022	64.409	60.086	59.442	46.491	36.839	40.475	42.991	41.713	43.153	30.607	26.496	27.321	35.723	39.351	41.201
BGIBMGA013228	magenta	CK_fatbody	gi|512891843|ref|XP_004922783.1| PREDICTED: bicaudal D-related protein homolog [Bombyx mori]	4e-174	76.65	-1.3218	5.6159	2.68982e-09	1.16711e-07	NA	NA	NA	NA	NA	NA	NA	NA	NA	NA	NA	NA	5.232	5.36	6.572	0.922	1.589	1.457	77.754	67.435	72.002	39.404	43.235	47.862	5.916	5.097	5.528	0.871	5.361	1.093	27.284	31.03	31.9	48.64	46.959	40.747
BGIBMGA013238	green	CK_fatbody,CK_midgut	gi|160358391|ref|NP_001104006.1| cytochrome P450 CYP6AE7 [Bombyx mori] gi|126583448|gb|ABO21682.1| CYP6AE family cytochrome P450 CYP6AE7 [Bombyx mori]	0	86.46	-1.03445	6.73591	1.72287e-08	6.25557e-07	-1.24835	4.7459	4.04043e-07	2.15119e-05	NA	NA	NA	NA	NA	NA	NA	NA	0	0	0.154	0	0	0.056	163.3	160.458	140.223	54.807	49.862	54.474	0	0	0	0.053	0.242	0	75.09	80.988	77.932	21.467	18.974	23.163
BGIBMGA013265	purple	CK_fatbody	no hints			-5.41041	2.48587	0.00652043	0.0488775	NA	NA	NA	NA	NA	NA	NA	NA	NA	NA	NA	NA	0	0	0	0.731	0	0.156	19.577	0	0	9.192	0	7.051	0	0	0	0	0.849	0.072	0	0	0	7.283	0	9.718
BGIBMGA013296	tan	Toxin_hemocyte	gi|357629554|gb|EHJ78253.1| putative p63 [Danaus plexippus]	0	62.5	NA	NA	NA	NA	NA	NA	NA	NA	NA	NA	NA	NA	1.01787	4.77728	0.000837066	0.0139545	15.961	10.38	13.08	9.329	8.998	8.67	7.28	7.017	9.703	11.046	6.396	9.198	29.036	26.387	26.276	8.742	9.352	9.039	9.275	8.103	10.185	6.434	9.887	8.653
BGIBMGA013327	purple	CK_fatbody	gi|304307739|ref|NP_001182009.1| tudor staphylococcus/micrococcal nuclease [Bombyx mori] gi|302190082|dbj|BAJ14101.1| tudor staphylococcus/micrococcal nuclease [Bombyx mori]	2e-28	100	-1.78948	2.97089	0.00373437	0.0306277	NA	NA	NA	NA	NA	NA	NA	NA	NA	NA	NA	NA	2.642	1.963	1.817	2.251	3.363	1.783	7.612	11.247	8.891	2.603	4.838	4.664	0.823	1.831	2.114	0.988	2.467	2.382	2.169	3.708	2.626	0.97	0.918	0.737
BGIBMGA013328	purple	CK_fatbody	gi|304307739|ref|NP_001182009.1| tudor staphylococcus/micrococcal nuclease [Bombyx mori] gi|302190082|dbj|BAJ14101.1| tudor staphylococcus/micrococcal nuclease [Bombyx mori]	0	99.28	-1.63905	8.54478	9.14907e-31	1.44957e-28	NA	NA	NA	NA	NA	NA	NA	NA	NA	NA	NA	NA	250.415	264.204	265.483	415.939	440.576	436.092	651.56	609.993	615.676	836.4	882.095	875.224	303.056	296.629	306.346	428.231	450.538	435.582	215.218	201.004	206.284	540.997	545.124	544.511
BGIBMGA013340	purple	CK_fatbody	gi|525343123|ref|NP_001266320.1| dihydrofolate reductase-like [Bombyx mori] gi|400234900|gb|AFP74113.1| dihydrofolate reductase [Bombyx mori]	1e-133	98.38	-1.38818	5.40172	8.73267e-10	4.16975e-08	NA	NA	NA	NA	NA	NA	NA	NA	NA	NA	NA	NA	20.722	11.481	14.369	69.447	73.693	76.891	63.677	63.303	61.338	16.906	18.815	18.345	10.951	8.03	9.548	81.259	80.834	74.923	25.166	26.027	23.007	13.907	20.301	12.627
BGIBMGA012627	greenyellow	CK_fatbody	gi|512906510|ref|XP_004926214.1| PREDICTED: dnaJ homolog subfamily C member 2-like [Bombyx mori]	0	95.07	-1.08393	5.99329	5.3868e-07	1.43698e-05	NA	NA	NA	NA	NA	NA	NA	NA	NA	NA	NA	NA	49.493	54.996	52.064	49.729	51.772	49.635	87.746	94.109	92.2	141.348	123.098	119.907	63.017	76.778	66.768	55.409	50.952	56.166	43.587	45.314	44.006	67.581	63.173	67.799
BGIBMGA012839	blue	CK_fatbody	gi|512918211|ref|XP_004929077.1| PREDICTED: cytosolic 10-formyltetrahydrofolate dehydrogenase-like [Bombyx mori]	5e-58	97.8	-1.65257	9.27931	2.86284e-25	3.78946e-23	NA	NA	NA	NA	NA	NA	NA	NA	NA	NA	NA	NA	1.916	1.423	2.846	8.674	8.741	10.132	953.889	1150.9	1047.33	5.048	0	3.149	0.495	0.966	0.454	11.334	8.706	9.662	379.648	352.332	302.333	2.013	1.43	3.766
BGIBMGA013402	red	Toxin_midgut	gi|358333488|dbj|GAA51995.1| voltage-dependent calcium channel alpha 1 invertebrate [Clonorchis sinensis]	2e-11	57.14	NA	NA	NA	NA	5.91409	2.31341	4.97294e-05	0.00141527	NA	NA	NA	NA	NA	NA	NA	NA	0	0	0	0	0	0	0.37	0.238	1.076	0	0	0	0	0	0	0	0	0	0	0	3.023	13.998	17.207	0
BGIBMGA012887	blue	CK_fatbody	gi|512917329|ref|XP_004928861.1| PREDICTED: alpha-tocopherol transfer protein-like [Bombyx mori]	0	100	-1.23524	3.98417	0.00156909	0.0149163	NA	NA	NA	NA	NA	NA	NA	NA	NA	NA	NA	NA	0	0.393	0.565	0	0	0	21.896	18.373	20.574	10.929	13.555	10.766	0.111	0.423	0	0	0.066	0	6.82	10.034	8.463	5.622	6.529	6.54
BGIBMGA013421	green	Toxin_fatbody,Toxin_midgut	gi|512895179|ref|XP_004923610.1| PREDICTED: nuclear factor interleukin-3-regulated protein-like [Bombyx mori]	0	100	3.55796	5.10932	1.99505e-37	4.25759e-35	2.98874	4.32918	2.0655e-20	6.99097e-18	NA	NA	NA	NA	NA	NA	NA	NA	20.658	16.634	14.802	12.891	9.215	9.611	7.18	5.004	6.412	5.247	6.97	7.07	32.032	34.509	27.081	10.053	12.608	13.344	73.818	79.215	78.733	56.89	54.454	45.882
BGIBMGA013429	black	Toxin_fatbody	gi|357626046|gb|EHJ76281.1| putative synaptic vesicle protein [Danaus plexippus]	1e-156	63.07	2.50685	2.87982	0.000104443	0.00151478	NA	NA	NA	NA	NA	NA	NA	NA	NA	NA	NA	NA	0	0	0	0.114	0	0	2.405	0.852	2.591	0.524	0.18	0.638	0	0	0	0.15	0	0	12.529	10.215	10.357	2.027	0.813	1.205
BGIBMGA013484	red	CK_hemocyte	gi|572265449|ref|XP_006610859.1| PREDICTED: DNA-directed RNA polymerase II 16 kDa polypeptide-like isoform X1 [Apis dorsata]	3e-93	40.65	NA	NA	NA	NA	NA	NA	NA	NA	NA	NA	NA	NA	-1.15398	5.15119	1.17739e-05	0.000328236	33.631	35.813	38.329	35.42	40.118	43.463	15.604	13.596	11.948	13.114	10.971	12.299	13.761	15.947	20.535	37.735	38.958	34.971	17.283	14.799	14.247	16.443	22.292	24.145
BGIBMGA013507	purple	CK_fatbody,CK_midgut	gi|341865525|dbj|BAG85355.2| cyclin E [Bombyx mori]	0	100	-1.62917	4.32292	2.60685e-06	6.00437e-05	-1.17013	4.25123	0.000110307	0.00271527	NA	NA	NA	NA	NA	NA	NA	NA	10.154	9.879	7.181	19.496	19.965	20.911	29.612	27.704	28.75	33.773	33.519	39.398	8.522	7.938	6.288	14.474	14.504	18.654	9.306	9.195	9.162	15.008	13.56	17.207
BGIBMGA013531	red	Toxin_fatbody	gi|332020158|gb|EGI60602.1| Muscle M-line assembly protein unc-89 [Acromyrmex echinatior]	0	54.92	1.5573	3.76796	5.87537e-05	0.000926678	NA	NA	NA	NA	NA	NA	NA	NA	NA	NA	NA	NA	2.299	1.488	1.739	12.189	11.445	10.888	6.5	6.867	7.108	132.406	151.582	147.997	0.873	0.851	0.979	11.182	12.211	10.717	22.693	21.091	21.189	161.878	170.106	164.808
BGIBMGA013536	red	CK_hemocyte	gi|378465800|gb|AFC01219.1| DnaJ-5 [Bombyx mori]	0	100	NA	NA	NA	NA	NA	NA	NA	NA	NA	NA	NA	NA	-1.41682	4.02424	0.000692586	0.0118328	18.018	11.219	18.956	6.17	4.153	5.26	2.739	5.385	4.762	15.704	7.144	11.585	5.385	5.955	5.454	8.386	4.112	3.025	9.71	13.5	6.678	14.181	11.235	9.285
BGIBMGA013578	green	CK_midgut	gi|512902156|ref|XP_004925306.1| PREDICTED: putative carbonic anhydrase 5-like [Bombyx mori]	2e-136	95.12	NA	NA	NA	NA	-1.37336	8.6796	6.91227e-23	3.27538e-20	NA	NA	NA	NA	NA	NA	NA	NA	0	0.161	0	0.043	0	0	4.632	4.066	2.99	882.046	949.626	885.56	0.377	0.199	0.145	0	0	0	3.376	3.374	1.964	351.39	369.243	312.547
BGIBMGA013597	black	Toxin_fatbody	gi|512901952|ref|XP_004925256.1| PREDICTED: diacylglycerol kinase theta-like [Bombyx mori]	0	97.53	1.35254	3.45198	0.00311001	0.0264401	NA	NA	NA	NA	NA	NA	NA	NA	NA	NA	NA	NA	138.24	139.835	146.655	0.028	0	0.1	4.492	6.609	6.231	75.159	90.955	89.418	91.716	80.527	86.685	0.152	0.037	0.144	16.55	15.254	13.948	109.396	106.233	100.084
BGIBMGA013602	tan	Toxin_hemocyte	gi|512902075|ref|XP_004925286.1| PREDICTED: protein smg8-like [Bombyx mori]	6e-86	100	NA	NA	NA	NA	NA	NA	NA	NA	NA	NA	NA	NA	5.47142	2.72463	3.06286e-05	0.000775297	0	0	0	5.675	0.172	5.193	0.389	8.382	0.182	0	5.565	5.741	5.475	7.091	6.037	6.63	5.069	5.976	0	1.634	0.64	0	6.266	0
BGIBMGA013614	yellow	CK_midgut	gi|512901956|ref|XP_004925257.1| PREDICTED: xylulose kinase-like [Bombyx mori]	0	100	NA	NA	NA	NA	-1.13902	3.65808	0.00221072	0.0325327	NA	NA	NA	NA	NA	NA	NA	NA	6.985	8.477	10.267	4.906	5.988	4.553	37.586	34.043	43.273	20.638	24.281	21.631	8.898	10.78	8.798	4.471	4.534	4.532	44.405	43.503	37.52	9.202	9.298	10.745
BGIBMGA013629	tan	Toxin_fatbody,Toxin_midgut	gi|512901999|ref|XP_004925267.1| PREDICTED: synaptic vesicle glycoprotein 2A-like [Bombyx mori]	0	100	1.10623	6.02741	7.79298e-08	2.46943e-06	2.14231	6.00621	8.04666e-26	5.08388e-23	NA	NA	NA	NA	NA	NA	NA	NA	57.126	76.248	63.854	1.884	1.642	2.25	47.331	43.722	49.437	37.661	35.9	37.13	78.308	76.455	78.391	2.489	2.628	1.457	112.59	102.631	95.539	168.358	160.607	153.841
BGIBMGA013634	turquoise	CK_hemocyte	gi|112983388|ref|NP_001036992.1| FK506-binding protein FKBP59 homologue [Bombyx mori] gi|60592749|dbj|BAD90849.1| FK506-binding protein FKBP59 homologue [Bombyx mori]	2e-109	100	NA	NA	NA	NA	NA	NA	NA	NA	NA	NA	NA	NA	-1.76544	6.01202	9.59545e-16	1.34206e-13	70.725	77.884	81.545	19.038	19.879	19.094	17.574	14.136	12.155	11.714	24.198	11.169	17.626	33.412	17.619	17.563	22.195	21.445	12.035	6.561	10.307	7.184	10.109	6.907
BGIBMGA013636	yellow	CK_fatbody	gi|512902007|ref|XP_004925269.1| PREDICTED: zinc finger protein 271-like [Bombyx mori]	0	100	-1.01554	4.99387	4.75434e-05	0.000765152	NA	NA	NA	NA	NA	NA	NA	NA	NA	NA	NA	NA	33.903	26.965	25.303	21.332	18.98	21.154	43.025	45.284	40.727	20.054	20.892	21.733	29.322	24.659	25.283	21.06	22.698	19.709	23.988	19.674	22.812	14.232	10.252	13.08
BGIBMGA012894	blue	Toxin_fatbody	gi|512917273|ref|XP_004928847.1| PREDICTED: adenosine deaminase AGSA-like isoform X1 [Bombyx mori] gi|512917277|ref|XP_004928848.1| PREDICTED: adenosine deaminase AGSA-like isoform X2 [Bombyx mori]	0	100	1.53482	5.64804	1.43028e-13	1.03864e-11	NA	NA	NA	NA	NA	NA	NA	NA	NA	NA	NA	NA	0.168	0	0.257	0.112	0	0.26	30.36	29.961	27.629	3.805	3.005	2.367	0	0.035	0.141	0.098	0.248	0.211	85.729	88.237	87.736	1.15	1.977	2.469
BGIBMGA013639	turquoise	Toxin_fatbody	gi|512902160|ref|XP_004925307.1| PREDICTED: polyol transporter 5-like [Bombyx mori]	0	90.43	1.30921	4.00902	0.000179484	0.00239397	NA	NA	NA	NA	NA	NA	NA	NA	NA	NA	NA	NA	0	0	0	0	0.012	0	8.775	9.898	9.945	1.804	2.614	3.283	0	0	0.106	0	0	0	21.726	24.432	26.913	0.999	1.215	0.443
BGIBMGA013644	grey	Toxin_fatbody,Toxin_midgut	no hints			2.59186	2.72208	0.000278576	0.00346794	1.25522	3.54183	0.000908812	0.0160205	NA	NA	NA	NA	NA	NA	NA	NA	0	0.017	0.454	0	0.151	0.144	1.005	1.419	1.738	6.322	11.282	9.444	0	0	0	0	0.172	0	11.547	10.56	8.102	21.792	18.606	25.324
BGIBMGA013652	tan	Toxin_fatbody	gi|512911311|ref|XP_004927380.1| PREDICTED: facilitated trehalose transporter Tret1-like [Bombyx mori]	0	95.43	1.626	5.90792	2.29254e-15	1.8729e-13	NA	NA	NA	NA	NA	NA	NA	NA	NA	NA	NA	NA	0	0	0	0	0	0	35.057	33.278	31.483	4.312	3.601	3.295	0	0	0.089	0	0.008	0.006	109.88	108.48	102.89	1.518	2.451	2.187
BGIBMGA013656	brown	Toxin_fatbody	gi|512911327|ref|XP_004927384.1| PREDICTED: solute carrier family 2, facilitated glucose transporter member 6-like [Bombyx mori]	0	100	1.04588	5.54256	2.51504e-07	7.2451e-06	NA	NA	NA	NA	NA	NA	NA	NA	NA	NA	NA	NA	0.102	0	0	0	0.005	0	28.522	31.911	40.951	1.313	1.075	1.314	0	0.05	0.147	0	0.091	0	67.855	79.376	70.285	0.988	0.871	0.312
BGIBMGA013699	black	CK_fatbody	gi|512907175|ref|XP_004926378.1| PREDICTED: ribosomal RNA-processing protein 8-like [Bombyx mori]	0	99.31	-1.05632	4.85362	7.57891e-05	0.00114859	NA	NA	NA	NA	NA	NA	NA	NA	NA	NA	NA	NA	32.926	37.093	26.837	33.363	40.371	44.562	40.401	37.835	38.958	34.921	36.353	30.364	26.619	25.878	29.026	45.086	37.397	39.543	18.685	22.462	16.929	21.361	18.231	21.512
BGIBMGA013700	tan	Toxin_fatbody	gi|114052138|ref|NP_001040221.1| troponin T [Bombyx mori] gi|87248429|gb|ABD36267.1| troponin T [Bombyx mori]	0	100	2.49809	8.09645	1.79416e-54	5.21153e-52	NA	NA	NA	NA	NA	NA	NA	NA	NA	NA	NA	NA	10.44	10.316	8.347	0.158	0.175	0.248	97.961	88.499	99.613	2373.95	2027.32	1920.9	10.556	10.999	13.138	0.2	0	0.122	590.348	550.199	524.103	2864.01	2536.57	2659.49
BGIBMGA013709	green	Toxin_fatbody	gi|512907233|ref|XP_004926391.1| PREDICTED: solute carrier family 22 member 3-like [Bombyx mori]	2e-42	58.06	2.58903	3.27096	7.96301e-07	2.04593e-05	NA	NA	NA	NA	NA	NA	NA	NA	NA	NA	NA	NA	0	0.468	0	0	0	0	3.351	2.49	1.976	2.953	2.5	4.187	0	0	0	0.13	0	0	18.362	15.614	15.707	5.592	3.744	4.133
BGIBMGA013151	blue	CK_fatbody	gi|512891931|ref|XP_004922805.1| PREDICTED: fatty acid synthase-like [Bombyx mori]	0	99.89	-1.25019	3.84202	0.00318625	0.0270224	NA	NA	NA	NA	NA	NA	NA	NA	NA	NA	NA	NA	0	0	0	0	0.044	0	18.747	19.494	15.84	0.06	0.069	0	0	0.071	0	0.05	0	0.005	7.781	7.672	7.801	0	0	0
BGIBMGA013741	brown	Toxin_fatbody	gi|91085635|ref|XP_970327.1| PREDICTED: similar to serrano protein [Tribolium castaneum]	0	59.25	5.2913	2.17657	0.000800418	0.00848881	NA	NA	NA	NA	NA	NA	NA	NA	NA	NA	NA	NA	0	0	0.444	0	0.157	0	0	0	0	0	0	0	0.43	0.063	0.314	0	0	0	9.281	0	9.619	0	0	0
BGIBMGA013399	pink	Toxin_fatbody	no hints			1.65561	4.06364	5.35801e-06	0.000113879	NA	NA	NA	NA	NA	NA	NA	NA	NA	NA	NA	NA	10.212	15.655	9.899	16.425	14.326	13.997	13.452	12.197	0.292	22.12	24.644	19.15	11.118	14.469	13.394	16.012	18.145	14.125	23.46	28.576	32.035	25.828	18.252	13.389
BGIBMGA013756	brown	CK_fatbody	gi|171740881|gb|ACB54935.1| chitin deacetylase [Helicoverpa armigera]	0	71.98	-1.53347	4.50997	1.92766e-06	4.59168e-05	NA	NA	NA	NA	NA	NA	NA	NA	NA	NA	NA	NA	0	0	0	0.106	0.383	0.195	26.941	34.732	36.346	28388.1	30518.6	30649.3	0	0.105	0	0	0.143	0.532	8.731	13.318	12.764	23161.5	23903.6	22787.6
BGIBMGA013416	blue	Toxin_fatbody	gi|512895171|ref|XP_004923608.1| PREDICTED: filamin-A-like [Bombyx mori]	0	100	1.56193	3.70632	0.000101977	0.0014852	NA	NA	NA	NA	NA	NA	NA	NA	NA	NA	NA	NA	0.178	0.137	0	1.387	1.749	1.621	8.525	4.88	6.066	61.835	50.443	54.877	0	0	0.039	0.857	1.356	1.057	20.603	20.474	19.556	69.022	71.208	64.477
BGIBMGA013774	turquoise	CK_fatbody	gi|512894460|ref|XP_004923436.1| PREDICTED: uridine phosphorylase 1-like isoform X1 [Bombyx mori]	0	100	-1.00097	5.52787	1.94013e-06	4.6109e-05	NA	NA	NA	NA	NA	NA	NA	NA	NA	NA	NA	NA	6.335	7.864	9.253	61.153	65.417	61.345	63.106	61.78	65.927	12.441	8.577	11.598	8.401	9.882	7.995	60.181	53.373	56.678	33.619	31.622	33.725	11.641	11.193	9.528
BGIBMGA013784	green	Toxin_midgut	gi|156537982|ref|XP_001608188.1| PREDICTED: protein IMPACT-like [Nasonia vitripennis]	2e-90	50.37	NA	NA	NA	NA	1.35185	4.38383	7.80751e-07	3.81401e-05	NA	NA	NA	NA	NA	NA	NA	NA	30.543	34.368	33.809	83.645	92.181	88.292	25.311	28.355	23.278	16.654	16.198	18.248	28.171	38.055	26.288	96.537	93.601	107.312	32.303	42.253	38.824	38.786	43.827	46.453
BGIBMGA013803	turquoise	Toxin_hemocyte,Toxin_fatbody,Toxin_midgut	gi|153791426|ref|NP_001093312.1| gloverin 3 precursor [Bombyx mori]	1e-123	100	3.63243	12.7999	2.50241e-172	3.27096e-169	1.561	4.52184	3.13231e-09	2.5813e-07	NA	NA	NA	NA	2.0144	4.95229	9.24536e-12	8.11624e-10	6.375	8.287	11.432	0	0	0	1243.17	1183.16	1191.73	17.243	17.463	15.987	38.13	42.007	31.304	0	0	0.131	15664.9	15628.2	15088.7	50.14	50.055	49.554
BGIBMGA013807	purple	CK_hemocyte	gi|512898398|ref|XP_004924390.1| PREDICTED: synaptic vesicular amine transporter-like [Bombyx mori]	0	99.53	NA	NA	NA	NA	NA	NA	NA	NA	NA	NA	NA	NA	-1.45601	3.58759	0.00339615	0.044697	11.069	10.774	11.521	0.089	0	0.097	0.285	0.03	0.084	3.033	1.211	2.532	4.355	4.066	3.327	0.111	0.074	0.009	0.491	0.983	0.777	2.544	2.633	2.88
BGIBMGA013816	black	Toxin_fatbody	gi|512898251|ref|XP_004924354.1| PREDICTED: hydroxylysine kinase-like [Bombyx mori]	0	100	1.72554	3.23945	0.00068487	0.00746009	NA	NA	NA	NA	NA	NA	NA	NA	NA	NA	NA	NA	0	0	0.186	0	0.065	0	5.294	3.552	3.364	157.676	148.107	160.224	0	0.007	0	0	0.146	0	11.359	16.706	14.436	239.431	231.812	243.222
BGIBMGA013638	blue	Toxin_fatbody	gi|512907994|ref|XP_004926573.1| PREDICTED: synaptic vesicle 2-related protein-like [Bombyx mori]	4e-60	38.78	3.44794	2.1757	0.00342422	0.0285999	NA	NA	NA	NA	NA	NA	NA	NA	NA	NA	NA	NA	0	0	0	0.043	0.123	0.062	0.544	0.758	0.383	22.184	24.488	21.419	0	0	0	0	0.143	0	5.83	5.884	4.637	39.15	39.551	30.797
BGIBMGA013853	yellow	Toxin_fatbody	no hints			1.13025	5.63885	7.30045e-08	2.32039e-06	NA	NA	NA	NA	NA	NA	NA	NA	NA	NA	NA	NA	102.634	145.698	127.352	1.465	1.304	0.406	29.66	39.618	35.913	19.021	11.938	20.357	159.444	126.674	135.227	0	1.066	0.687	78.954	73.214	86.828	35.079	25.09	18.051
BGIBMGA013863	brown	Toxin_fatbody	gi|112982990|ref|NP_001036930.1| gloverin 1 precursor [Bombyx mori] gi|52421205|dbj|BAD51473.1| gloverin-like protein 1 [Bombyx mori]	9e-127	98.88	6.6498	7.03495	1.43779e-114	8.84409e-112	NA	NA	NA	NA	NA	NA	NA	NA	NA	NA	NA	NA	3.184	3.094	3.798	0	0	0.419	4.002	0.888	2.752	0.281	1.576	0.042	7.165	7.338	7.866	0	0	0	334.294	314.754	309.196	3.951	2.408	1.825
BGIBMGA013729	greenyellow	Toxin_fatbody	gi|512907213|ref|XP_004926386.1| PREDICTED: proton myo-inositol cotransporter-like [Bombyx mori]	0	94.12	1.91322	4.11346	2.34513e-08	8.10772e-07	NA	NA	NA	NA	NA	NA	NA	NA	NA	NA	NA	NA	0	0.117	0	0.096	0	0.241	7.506	10.291	5.836	15.02	12.975	15.703	0	0.146	0	0	0	0	28.568	33.608	29.829	8.81	10.592	13.218
BGIBMGA013865	purple	Toxin_hemocyte,Toxin_fatbody,Toxin_midgut	gi|112982699|ref|NP_001037684.1| gloverin 4 precursor [Bombyx mori] gi|82949292|dbj|BAE53373.1| antibacterial peptide [Bombyx mori]	5e-122	100	5.32791	9.3152	4.17031e-187	8.72178e-184	4.0927	3.60696	1.69846e-17	4.35035e-15	NA	NA	NA	NA	1.40223	8.71494	6.78383e-19	1.21696e-16	151.032	211.841	189.957	0.092	0.327	0	35.929	36.798	34.129	0.39	2.448	1.898	511.044	494.479	488.86	0.063	0.587	0.044	1499.81	1472.25	1463.93	31.62	33.374	30.62
BGIBMGA013866	green	Toxin_hemocyte,Toxin_fatbody,Toxin_midgut	gi|112982699|ref|NP_001037684.1| gloverin 4 precursor [Bombyx mori] gi|82949292|dbj|BAE53373.1| antibacterial peptide [Bombyx mori]	8e-23	82.69	5.56591	8.10545	7.60645e-140	6.11851e-137	4.19108	2.4009	3.00286e-06	0.000126071	NA	NA	NA	NA	1.0334	7.23925	1.08826e-07	4.55855e-06	69.422	85.523	80.483	0.056	0.377	0	12.059	11.102	16.659	0.02	1.04	0	133.46	200.69	158	0	0	0	645.866	681.723	627.117	12.57	10.327	10.021
BGIBMGA013879	purple	Toxin_fatbody	gi|512898259|ref|XP_004924356.1| PREDICTED: 5-hydroxyisourate hydrolase-like [Bombyx mori]	3e-57	97.73	6.66254	3.06051	0.000403139	0.00475805	NA	NA	NA	NA	NA	NA	NA	NA	NA	NA	NA	NA	0	0	0	0	0	38.058	0	0	0	0	0	0	0	0	0	29.559	0	0	0	48.605	0	0	0	0
BGIBMGA013902	turquoise	CK_midgut	gi|512936612|ref|XP_004933560.1| PREDICTED: adenine phosphoribosyltransferase-like [Bombyx mori]	3e-126	100	NA	NA	NA	NA	-1.28155	5.13	9.34378e-09	6.90884e-07	NA	NA	NA	NA	NA	NA	NA	NA	20.112	22.725	18.621	54.071	59.944	55.159	81.095	106.787	87.964	73.314	61.608	77.665	22.569	27.966	28.524	64.206	62.822	56.407	64.148	52.333	53.784	29.425	28.811	28.918
BGIBMGA013909	grey	Toxin_hemocyte,Toxin_fatbody,Toxin_midgut	gi|91085339|ref|XP_970452.1| PREDICTED: similar to GA17526-PA [Tribolium castaneum]	2e-95	36.88	2.78978	5.70413	3.74083e-32	6.30933e-30	1.03791	5.69743	3.72466e-07	2.0056e-05	NA	NA	NA	NA	1.10541	5.42664	2.39461e-06	7.5421e-05	20.672	23.157	18.955	0.658	0.66	1.201	15.336	13.575	17.215	52.23	54.972	48.306	45.604	48.138	41.892	0.814	0.908	0.386	113.266	116.521	100.885	109.472	105.353	99.799
BGIBMGA013919	yellow	CK_midgut	gi|357630109|gb|EHJ78467.1| putative Juvenile hormone-inducible protein [Danaus plexippus]	7e-134	48.3	NA	NA	NA	NA	-3.05175	2.00395	0.00342419	0.0458348	NA	NA	NA	NA	NA	NA	NA	NA	0	0	0	0.362	0.319	0.82	0.349	0.637	1.129	4.766	5.463	7.061	0	0	0	0.641	0.452	0.215	1.808	1.208	1.55	0	1.278	0
BGIBMGA013921	black	CK_midgut	no hints			NA	NA	NA	NA	-1.3822	3.60418	0.00042796	0.00868474	NA	NA	NA	NA	NA	NA	NA	NA	0	0	0	1.935	1.661	1.483	2.142	1.254	0.897	22.415	22.323	23.21	0	0	0	2.611	2.331	2.711	1.267	1.102	0.54	10.061	8.047	7.176
BGIBMGA013746	blue	Toxin_fatbody	gi|112984020|ref|NP_001036832.1| prophenoloxidase activating enzyme precursor [Bombyx mori] gi|4521258|dbj|BAA76308.1| prophenoloxidase activating enzyme [Bombyx mori]	0	99.66	1.56715	3.64382	0.000115171	0.00165206	NA	NA	NA	NA	NA	NA	NA	NA	NA	NA	NA	NA	2143.49	2547.23	2324.04	51.94	52.766	47.307	7.796	4.276	6.404	4.601	5.388	3.813	2145.77	2148.53	2085.45	39.465	47.33	47.503	15.922	18.737	25.202	5.829	7.757	4.572
BGIBMGA013938	magenta	Toxin_fatbody,Toxin_midgut	gi|512936460|ref|XP_004933525.1| PREDICTED: growth arrest and DNA damage-inducible protein GADD45 alpha-like [Bombyx mori]	3e-118	100	3.51029	5.54075	1.20931e-44	3.08433e-42	2.54803	5.78709	1.65575e-29	1.42651e-26	NA	NA	NA	NA	NA	NA	NA	NA	42.987	48.102	40.905	9.432	10.225	11.068	9.705	6.511	9.54	25.173	23.231	25.816	83.79	83.56	80.105	9.349	10.398	8.388	103.921	115.9	92.9	128.22	151.406	151.436
BGIBMGA013966	black	Toxin_cell	no hints			NA	NA	NA	NA	NA	NA	NA	NA	8.5452	4.77696	1.58421e-37	4.57255e-34	NA	NA	NA	NA	0	0	0	0	0	0	0	0	0	0	0	0	0	0	0	32.044	32.478	41.296	0	0	0	0	0	0
BGIBMGA013972	purple	CK_hemocyte	gi|512936741|ref|XP_004933592.1| PREDICTED: homocysteine-responsive endoplasmic reticulum-resident ubiquitin-like domain member 2 protein-like [Bombyx mori]	6e-136	100	NA	NA	NA	NA	NA	NA	NA	NA	NA	NA	NA	NA	-2.95474	4.36314	0.00198681	0.0286629	77.285	3.995	4.036	2.815	3.643	2.463	6.812	5.018	7.123	5.047	4.632	3.785	4.285	2.977	3.441	4.475	3.944	6.513	8.246	10.645	9.971	10.739	11.363	12.473
BGIBMGA013758	pink	CK_midgut	gi|156968289|gb|ABU98616.1| chitin binding PM protein [Helicoverpa armigera]	3e-154	67.35	NA	NA	NA	NA	-1.3338	6.3414	3.23276e-13	5.19268e-11	NA	NA	NA	NA	NA	NA	NA	NA	0	0	0	0.078	0.155	0.079	0	0.456	0.015	180.351	171.052	166.059	0	0	0	0.176	0.084	0.038	0.146	0.116	0.301	72.312	67.138	62.227
BGIBMGA014046	green	CK_fatbody	gi|512912231|ref|XP_004927604.1| PREDICTED: pre-rRNA processing protein FTSJ3-like [Bombyx mori]	0	99.63	-1.14151	6.66265	9.7775e-10	4.60556e-08	NA	NA	NA	NA	NA	NA	NA	NA	NA	NA	NA	NA	72.982	78.175	81.834	160.992	165.881	166.901	151.637	157.708	140.755	113.245	109.007	107.297	89.815	95.406	87.531	191.631	188.006	190.073	67.833	70.78	72.59	65.348	69.097	71.657
BGIBMGA014052	purple	Toxin_fatbody	gi|512912628|ref|XP_004927704.1| PREDICTED: major facilitator superfamily domain-containing protein 6-B-like [Bombyx mori]	0	100	1.24915	6.20469	1.5393e-10	8.04825e-09	NA	NA	NA	NA	NA	NA	NA	NA	NA	NA	NA	NA	11.853	14.569	10.117	3.779	3.962	3.436	52.583	43.902	53.522	80.561	83.39	72.316	10.881	9.724	11.166	4.59	2.363	5.63	123.883	120.945	121.641	112.663	105.343	102.272
BGIBMGA014055	green	Toxin_fatbody	gi|512912491|ref|XP_004927669.1| PREDICTED: facilitated trehalose transporter Tret1-2 homolog [Bombyx mori]	0	95.82	2.79323	4.68979	7.68037e-21	8.72974e-19	NA	NA	NA	NA	NA	NA	NA	NA	NA	NA	NA	NA	0	0	0	0	0.056	0	7.961	6.886	7.396	1.924	2.867	2.213	0	0.018	0	0	0.115	0	54.176	50.969	54.892	1.76	2.324	1.511
BGIBMGA014103	turquoise	Toxin_fatbody	gi|512901633|ref|XP_004925183.1| PREDICTED: WAS/WASL-interacting protein family member 1-like [Bombyx mori]	6e-65	98.26	6.13363	2.7609	0.00101111	0.0102952	NA	NA	NA	NA	NA	NA	NA	NA	NA	NA	NA	NA	0	0	0	0	0	0	0	0	0	0	0	0	0	0	0	0	0	0	33.022	0	0	0	0	15.18
BGIBMGA014112	turquoise	CK_fatbody	gi|357622619|gb|EHJ74045.1| putative ADP-ribosylation factor GTPase-activating protein 1 [Danaus plexippus]	2e-65	76.43	-1.01721	4.27651	0.00597985	0.0454443	NA	NA	NA	NA	NA	NA	NA	NA	NA	NA	NA	NA	14.482	16.069	11.942	34.905	36.593	38.011	27.973	14.718	31.556	16.796	13.01	32.121	12.676	8.437	8.646	32.439	15.47	23.231	9.474	7.611	21.564	30.364	27.386	23.261
BGIBMGA013831	greenyellow	Toxin_fatbody	gi|379698966|ref|NP_001243955.1| UDP-glycosyltransferase UGT33D2 precursor [Bombyx mori] gi|363896124|gb|AEW43146.1| UDP-glycosyltransferase UGT33D2 [Bombyx mori]	0	99.8	1.50821	4.12496	1.15948e-05	0.000227097	NA	NA	NA	NA	NA	NA	NA	NA	NA	NA	NA	NA	0	0.127	0.024	0.392	0.239	0.416	9.202	9.574	9.913	2.868	2.082	3.853	0	0	0.037	0.449	0.517	0.353	28.712	27.49	27.151	2.634	1.81	2.365
BGIBMGA014126	brown	Toxin_fatbody	gi|512901593|ref|XP_004925173.1| PREDICTED: RING finger protein nhl-1-like isoform X1 [Bombyx mori] gi|512901597|ref|XP_004925174.1| PREDICTED: RING finger protein nhl-1-like isoform X2 [Bombyx mori]	0	96.27	2.0267	3.92574	6.47826e-08	2.07801e-06	NA	NA	NA	NA	NA	NA	NA	NA	NA	NA	NA	NA	0.063	0.041	0.063	0.271	0.053	0.092	5.643	6.342	6.347	129.406	141.773	137.417	0.063	0.065	0.108	0.268	0.241	0.254	25.772	28.909	25.622	152.125	148.119	149.794
BGIBMGA014143	black	CK_fatbody	gi|512906444|ref|XP_004926198.1| PREDICTED: ATP-dependent RNA helicase DDX24-like [Bombyx mori]	0	97.34	-1.11011	5.11893	4.51335e-06	9.79172e-05	NA	NA	NA	NA	NA	NA	NA	NA	NA	NA	NA	NA	19.49	16.935	19.13	46.601	47.766	47.101	47.785	49.261	48.322	37.558	33.699	35.637	20.729	23.909	22.326	54.588	50.047	47.707	23.918	23.771	19.415	19.496	17.457	18.619
BGIBMGA014144	brown	Toxin_fatbody	gi|512906429|ref|XP_004926194.1| PREDICTED: myrosinase 1-like [Bombyx mori]	0	100	1.04528	5.54149	1.3606e-07	4.08843e-06	NA	NA	NA	NA	NA	NA	NA	NA	NA	NA	NA	NA	0.184	0	0.033	0.28	0.281	0.29	32.46	35.866	34.188	0.314	0	0.331	0	0	0	0.173	1.808	0.28	74.73	73.005	68.403	0.24	0.262	0.206
BGIBMGA014122	pink	CK_midgut	gi|512901581|ref|XP_004925170.1| PREDICTED: AP-2 complex subunit mu-like [Bombyx mori]	1e-64	92.73	NA	NA	NA	NA	-2.10279	5.15778	0.000125701	0.00303895	NA	NA	NA	NA	NA	NA	NA	NA	266.754	332.282	326.927	189.79	193.821	198.591	124.166	101.946	119.078	38.667	102.985	100.587	433.593	421.854	431.494	159.57	173.227	179.58	103.744	119.477	115.569	31.242	0	25.82
BGIBMGA014149	greenyellow	Toxin_fatbody	gi|512906413|ref|XP_004926190.1| PREDICTED: myrosinase 1-like [Bombyx mori]	4e-96	98.58	3.20107	4.12333	3.03324e-16	2.71099e-14	NA	NA	NA	NA	NA	NA	NA	NA	NA	NA	NA	NA	0	0	0.019	0	0	0	4.645	4.455	2.561	419.326	427.094	337.219	0	0	0	0	0	0	36.182	30.931	43.01	645.23	620.825	652.881
BGIBMGA014175	red	Toxin_hemocyte,Toxin_midgut	gi|512906245|ref|XP_004926148.1| PREDICTED: cytochrome c oxidase subunit 6C-like isoform X1 [Bombyx mori] gi|512906249|ref|XP_004926149.1| PREDICTED: cytochrome c oxidase subunit 6C-like isoform X2 [Bombyx mori] gi|512906253|ref|XP_004926150.1| PREDICTED: cytochrome c oxidase subunit 6C-like isoform X3 [Bombyx mori]	6e-49	100	NA	NA	NA	NA	6.54845	7.6055	3.48346e-06	0.000143534	NA	NA	NA	NA	5.33022	5.76117	5.3186e-05	0.00126118	2.094	1.667	0.97	2.087	1.74	2.212	2.873	7.82	4.507	8.106	7.74	5.001	3.061	245.924	2.079	1.722	2.422	2.364	4.672	5.418	5.045	1892.6	2.511	4.481
BGIBMGA014157	blue	CK_midgut	gi|512906378|ref|XP_004926181.1| PREDICTED: probable ATP-dependent RNA helicase DDX27-like [Bombyx mori]	0	99.73	NA	NA	NA	NA	-1.20475	4.27483	5.66407e-05	0.00157628	NA	NA	NA	NA	NA	NA	NA	NA	21.168	19.419	20.628	62.534	60.351	61.074	63.739	64.098	67.456	35.37	41.311	34.002	29.297	31.691	27.091	72.78	73.484	71.795	41.095	36.588	34.617	16.601	17.899	12.467
BGIBMGA014201	red	CK_fatbody	gi|512937297|ref|XP_004933733.1| PREDICTED: cytosolic 10-formyltetrahydrofolate dehydrogenase-like, partial [Bombyx mori]	0	99.83	-2.04694	8.42835	2.78911e-29	4.0508e-27	NA	NA	NA	NA	NA	NA	NA	NA	NA	NA	NA	NA	1.547	1.806	1.33	11.885	14.343	14.264	649.623	550.446	632.335	3.149	1.496	1.861	0.729	0.372	0.644	8.644	11.272	10.855	133.006	190.102	134.984	0.702	0.533	0.436
BGIBMGA014209	turquoise	Toxin_fatbody	gi|512940017|ref|XP_004934379.1| PREDICTED: proton-coupled amino acid transporter 1-like isoform X1 [Bombyx mori] gi|512940019|ref|XP_004934380.1| PREDICTED: proton-coupled amino acid transporter 1-like isoform X2 [Bombyx mori]	0	100	3.65346	3.4102	1.65264e-11	9.76364e-10	NA	NA	NA	NA	NA	NA	NA	NA	NA	NA	NA	NA	14.661	18.926	16.15	0	0	0.08	1.606	2.233	1.042	98.794	75.531	70.327	22.35	17.69	12.858	0	0.188	0	24.808	16.605	20.476	87.522	91.515	108.989
BGIBMGA014214	brown	CK_midgut	gi|357624865|gb|EHJ75478.1| cyclic AMP-regulated protein [Danaus plexippus]	7e-85	61.71	NA	NA	NA	NA	-1.39916	7.24589	4.7506e-20	1.55246e-17	NA	NA	NA	NA	NA	NA	NA	NA	272.382	287.801	277.51	40.79	39.412	42.364	59.816	51.345	50.464	326.122	332.463	335.579	212.539	239.797	216.804	36.509	35.274	33.865	50.135	47.809	34.259	124.097	122.512	125.372
BGIBMGA014226	cyan	Toxin_fatbody	gi|340718034|ref|XP_003397477.1| PREDICTED: myosin heavy chain, muscle-like isoform 2 [Bombus terrestris]	0	78.92	2.4766	8.65488	1.00438e-64	3.88991e-62	NA	NA	NA	NA	NA	NA	NA	NA	NA	NA	NA	NA	0.421	0.603	0.51	0.096	0.243	0.122	138.465	139.83	144.77	1797.82	2127.22	2124.34	0.686	0.416	1.017	0.256	0.193	0.035	817.985	821.478	797.161	2589.63	2672.16	2565.99
BGIBMGA014227	purple	Toxin_fatbody	gi|158299190|ref|XP_319309.3| AGAP010147-PA [Anopheles gambiae str. PEST] gi|157014247|gb|EAA43613.3| AGAP010147-PA [Anopheles gambiae str. PEST]	0	84.17	2.26408	8.46899	5.9863e-51	1.6051e-48	NA	NA	NA	NA	NA	NA	NA	NA	NA	NA	NA	NA	0.75	0.817	0.73	0.184	0.09	0.092	150.53	125.042	145.755	1812.51	2121.56	2136.57	0.896	0.892	0.814	0.296	0.217	0.061	720.468	686.731	684.467	2640.6	2448.42	2509.9
BGIBMGA014236	brown	Toxin_hemocyte	gi|512902539|ref|XP_004925400.1| PREDICTED: myosin-IA-like [Bombyx mori]	0	92.28	NA	NA	NA	NA	NA	NA	NA	NA	NA	NA	NA	NA	1.28326	5.38763	8.41882e-08	3.56267e-06	20.243	18.3	16.556	13.462	14.29	14.544	5.174	4.559	5.33	30.888	35.156	37.643	46.588	45.786	45.28	12.724	12.937	13.467	7.901	7.931	7.201	32.714	36.868	35.168
BGIBMGA014199	pink	Toxin_fatbody	gi|290563235|ref|NP_001166704.1| cuticular protein RR-1 motif 53 precursor [Bombyx mori] gi|223671208|tpd|FAA00556.1| TPA: putative cuticle protein [Bombyx mori]	6e-172	100	1.69064	3.84811	1.03108e-05	0.000204592	NA	NA	NA	NA	NA	NA	NA	NA	NA	NA	NA	NA	0	0	0	3.253	1.741	1.653	8.956	3.815	7.536	2.632	3.403	2.607	0	0.562	0	2.564	1.796	2.926	22.495	25.654	22.242	5.621	3.545	4.663
BGIBMGA014246	blue	Toxin_midgut	gi|512902421|ref|XP_004925372.1| PREDICTED: putative inorganic phosphate cotransporter-like [Bombyx mori]	0	100	NA	NA	NA	NA	1.24061	5.82904	3.42343e-10	3.31059e-08	NA	NA	NA	NA	NA	NA	NA	NA	0	0.15	0.296	0.106	0.025	0.159	2424.05	2545.58	2542.92	54.312	50.793	50.175	0	0.113	0.161	0	0.231	0.045	2539.72	2482.03	2448.6	113.519	120.214	126.409
BGIBMGA014259	green	Toxin_fatbody	gi|112982705|ref|NP_001036907.1| inorganic phosphate transporter 1 [Bombyx mori] gi|40786377|dbj|BAD07026.1| BmPI-T1 [Bombyx mori]	0	90.61	2.30637	4.89782	2.51877e-18	2.48479e-16	NA	NA	NA	NA	NA	NA	NA	NA	NA	NA	NA	NA	0.131	0	0	0.295	0	0	10.807	12.361	10.389	10.789	9.472	10.643	0	0	0	0	0	0.01	61.846	59.791	54.075	13.24	15.001	13.475
BGIBMGA014257	pink	Toxin_fatbody	gi|512902513|ref|XP_004925393.1| PREDICTED: putative inorganic phosphate cotransporter-like [Bombyx mori]	4e-178	94.42	1.31975	8.38221	3.96822e-21	4.61063e-19	NA	NA	NA	NA	NA	NA	NA	NA	NA	NA	NA	NA	0	0	0.046	0.144	0.097	0.027	214.007	208.378	230.54	6.237	6.418	11.418	0	0	0	0.144	0	0	575.967	564.051	547.133	3.322	2.252	3.224
BGIBMGA014285	greenyellow	Toxin_fatbody,Toxin_midgut	gi|112984270|ref|NP_001037462.1| cecropin-A precursor [Bombyx mori] gi|512938251|ref|XP_004933962.1| PREDICTED: cecropin-A-like [Bombyx mori] gi|2493573|sp|Q27239.1|CECA_BOMMO RecName: Full=Cecropin-A; Flags: Precursor gi|765344|gb|AAC60515.1| cecropin A [Bombyx mori] gi|1220101|dbj|BAA04217.1| preprocecropin A [Bombyx mori] gi|2970030|dbj|BAA25178.1| cecropin A [Bombyx mori] gi|2970032|dbj|BAA25…	9e-35	100	9.85646	8.47017	9.36405e-193	2.448e-189	5.29399	3.85073	9.79282e-24	5.45921e-21	NA	NA	NA	NA	NA	NA	NA	NA	2.388	1.487	0.825	0	0	0	0	0.58	1.084	2.168	1.735	0	1.72	0.505	3.114	0.124	0	0.71	860.194	833.906	864.988	40.591	38.356	42.766
BGIBMGA014290	turquoise	CK_midgut	gi|512938247|ref|XP_004933961.1| PREDICTED: ATP-citrate synthase-like, partial [Bombyx mori]	2e-64	100	NA	NA	NA	NA	-1.96838	3.42566	5.72647e-05	0.00158683	NA	NA	NA	NA	NA	NA	NA	NA	30.431	10.834	9.944	39.344	37.065	38.979	944.773	736.576	935.931	20.551	15.94	26.084	8.532	13.59	43.331	69.169	30.597	26.464	458.745	431.217	490.542	0.928	14.013	0.233
BGIBMGA014294	green	CK_fatbody	gi|512939936|ref|XP_004934354.1| PREDICTED: ATP-citrate synthase-like, partial [Bombyx mori]	0	100	-1.06736	8.88981	4.58122e-09	1.88606e-07	NA	NA	NA	NA	NA	NA	NA	NA	NA	NA	NA	NA	30.057	28.768	24.582	44.528	41.949	32.561	825.556	541.787	783.628	42.398	49.018	46.701	26.1	29.313	29.174	30.208	36.117	32.964	342.2	364.175	352.723	36.049	38.649	37.297
BGIBMGA014298	red	CK_fatbody	no hints			-1.37135	3.99901	0.000446837	0.00519753	NA	NA	NA	NA	NA	NA	NA	NA	NA	NA	NA	NA	0	0.028	0	0	0	0.256	23.431	17.953	22.759	22558.7	23087.2	23327.1	0	0.153	0	0	0.212	0	9.415	7.943	7.364	16645	17689.7	16766.4
BGIBMGA014287	greenyellow	Toxin_fatbody	gi|512939938|ref|XP_004934355.1| PREDICTED: luciferin 4-monooxygenase-like [Bombyx mori]	8e-146	84.85	3.39037	3.83862	1.17065e-14	9.06775e-13	NA	NA	NA	NA	NA	NA	NA	NA	NA	NA	NA	NA	0	0	0	0.157	0.296	0.219	2.603	2.574	3.068	0.451	0	0.114	0	0	0.179	0.239	4.273	0.225	28.934	29.212	29.896	0	0	0.352
BGIBMGA014346	black	Toxin_midgut	no hints			NA	NA	NA	NA	3.27888	1.89499	0.00342419	0.0458348	NA	NA	NA	NA	NA	NA	NA	NA	1.265	0	0.321	0.235	1.839	0.212	0.581	0.313	0.007	0.813	0.167	0.37	0	0.136	0.339	0.145	0.655	2.129	0.601	0.416	1.039	4.173	4.534	9.06
BGIBMGA014360	salmon	Toxin_hemocyte	gi|148298841|ref|NP_001091819.1| putative defense protein precursor [Bombyx mori] gi|121950233|sp|Q008X1.1|DFP_BOMMO RecName: Full=Putative defense protein; Flags: Precursor gi|115526910|gb|ABJ09465.1| immune-related protein [Bombyx mori] gi|325660637|gb|ADZ40416.1| Immune-related protein 1 [Bombyx mori]	4e-123	100	NA	NA	NA	NA	NA	NA	NA	NA	NA	NA	NA	NA	1.08786	6.21764	3.19303e-09	1.67827e-07	32.095	42.045	35.818	0	0	0.417	0.949	1.246	2.168	0	0	0.74	83.739	76.097	80.501	0	0	0	4.536	3.584	4.509	2.112	1.661	1.061
BGIBMGA014370	brown	Toxin_fatbody	gi|512911032|ref|XP_004927316.1| PREDICTED: protein toll-like [Bombyx mori]	0	94.83	1.26112	4.82549	6.30489e-07	1.64006e-05	NA	NA	NA	NA	NA	NA	NA	NA	NA	NA	NA	NA	23.091	22.584	20.026	3.912	4.002	3.766	19.195	16.28	19.341	8.287	10.816	12.254	25.232	25.111	23.17	2.548	4.993	3.877	47.752	44.389	44.318	19.796	14.958	14.17
BGIBMGA014378	green	CK_fatbody	gi|512911040|ref|XP_004927318.1| PREDICTED: lipase 3-like [Bombyx mori]	0	100	-1.25507	4.25925	0.000228247	0.00294301	NA	NA	NA	NA	NA	NA	NA	NA	NA	NA	NA	NA	0	0	0	0.109	0	0	22.875	27.151	26.169	12.101	13.774	11.433	0	0.078	0	0.179	0	0	8.256	12.649	13.006	5.237	3.044	4.358
BGIBMGA014428	green	CK_fatbody	gi|512912568|ref|XP_004927690.1| PREDICTED: collagenase-like [Bombyx mori]	0	100	-1.19696	3.72611	0.00466632	0.0369385	NA	NA	NA	NA	NA	NA	NA	NA	NA	NA	NA	NA	0.074	0	0	0	0.016	0.399	20.518	9.039	20.345	8688.11	9853.38	9991.78	0	0.359	0.362	0.282	0.262	0	6.432	7.303	7.11	14937.7	15196.5	13297.8
BGIBMGA014429	black	CK_fatbody	gi|61191881|gb|AAX39408.1| serine protease [Bombyx mandarina] gi|164470774|gb|ABY58153.1| serine protease [Bombyx mandarina]	0	96.13	-1.58896	4.71348	1.03083e-07	3.18211e-06	NA	NA	NA	NA	NA	NA	NA	NA	NA	NA	NA	NA	0.042	0.665	0	1.392	1.734	1.162	40.043	35.823	39.65	26232.7	29070.3	29191.8	0	0	0.275	0.889	0.912	1.521	11.912	13.756	13.758	35537.6	37015.5	34077.2
BGIBMGA014465	brown	CK_hemocyte	gi|512937349|ref|XP_004933746.1| PREDICTED: neuroligin-2-like, partial [Bombyx mori]	6e-97	93.33	NA	NA	NA	NA	NA	NA	NA	NA	NA	NA	NA	NA	-2.90925	2.91399	0.000730959	0.0124113	4.486	8.301	7.772	0.267	0	0	0	0	0	0	0	0	0.917	0	1.528	0	0	0	0	0	0	0	0	0
BGIBMGA014499	green	CK_fatbody	gi|607361202|gb|EZA55495.1| Histone H2A [Cerapachys biroi]	9e-41	100	-7.02819	3.67226	0.000297701	0.00367107	NA	NA	NA	NA	NA	NA	NA	NA	NA	NA	NA	NA	0	0	0	0	0	0	0	0	62.553	0	0	0	0	0	0	0	0	0	0	0	0	0	0	0
BGIBMGA014507	blue	CK_midgut	gi|512937290|ref|XP_004933731.1| PREDICTED: V-type proton ATPase subunit e-like [Bombyx mori]	5e-24	97.96	NA	NA	NA	NA	-1.4398	4.09222	1.42162e-05	0.000491704	NA	NA	NA	NA	NA	NA	NA	NA	5.544	5.991	5.969	29.96	8.514	1.366	18.14	14.179	15.204	36.797	24.636	37.78	8.313	8.982	7.276	6.46	4.927	25.089	14.007	19.341	16.609	12.657	13.583	9.515
BGIBMGA014525	black	CK_hemocyte	gi|379046510|gb|AFC87816.1| 30K protein 18 [Bombyx mori]	8e-78	97.56	NA	NA	NA	NA	NA	NA	NA	NA	NA	NA	NA	NA	-2.02315	7.36853	3.87038e-28	1.2284e-25	185.43	234.509	206.946	0	0.112	0	1.005	0.947	0.77	0	0	0	52.823	51.895	53.337	0	0.065	0	1.323	0.831	1.775	0	0.112	0
BGIBMGA014533	turquoise	Toxin_hemocyte	no hints			NA	NA	NA	NA	NA	NA	NA	NA	NA	NA	NA	NA	1.97557	8.59111	0.00347698	0.0453988	2.813	163.795	207.472	3.354	3.464	4.017	7.948	10.053	0.345	11.62	18.731	17.926	461.795	523.368	515.44	4.864	3.703	3.045	7.302	17.917	7.872	12.032	16.888	14.987
BGIBMGA014545	purple	CK_hemocyte	gi|512937526|ref|XP_004933787.1| PREDICTED: cubilin-like [Bombyx mori]	0	99.91	NA	NA	NA	NA	NA	NA	NA	NA	NA	NA	NA	NA	-5.42587	2.72239	3.06286e-05	0.000775297	5.636	6.264	6.247	0.08	0.118	0.03	204.791	250.304	217.055	0.346	0.18	0.483	0.025	0.1	0.169	0.037	0.018	0.03	377.709	402.792	410.428	0.163	0.062	0.191
BGIBMGA014585	yellow	Toxin_fatbody	gi|474089078|gb|EMS54799.1| Histone H4 [Triticum urartu]	1e-44	95	1.06919	4.48207	0.000211632	0.00275596	NA	NA	NA	NA	NA	NA	NA	NA	NA	NA	NA	NA	6.434	8.084	7.366	4.42	4.691	4.17	10.277	20.451	15.633	10.244	9.023	7.079	10.605	10.138	10.503	4.466	5.412	3.614	36.084	32.347	31.393	14.605	16.504	18.59
BGIBMGA014593	yellow	Toxin_midgut	gi|512937824|ref|XP_004933859.1| PREDICTED: alpha-ketoglutarate-dependent dioxygenase alkB homolog 4-like isoform X1 [Bombyx mori] gi|512937828|ref|XP_004933860.1| PREDICTED: alpha-ketoglutarate-dependent dioxygenase alkB homolog 4-like isoform X2 [Bombyx mori]	0	100	NA	NA	NA	NA	5.01989	4.49068	5.55997e-05	0.00155433	NA	NA	NA	NA	NA	NA	NA	NA	144.529	139.548	159.391	9.247	9.715	9.237	85.375	93.419	1.258	1.708	1.21	2.42	134.484	4.044	0.369	8.223	422.264	7.694	2.767	75.294	20.075	0	178.212	2.786
BGIBMGA014601	green	Toxin_fatbody	gi|357615674|gb|EHJ69782.1| beaten path Ic [Danaus plexippus]	8e-58	75.83	1.17552	6.74908	4.04994e-11	2.22896e-09	NA	NA	NA	NA	NA	NA	NA	NA	NA	NA	NA	NA	0	0	0	0	0	0	83.766	65.998	76.51	0.629	0.686	0.187	0	0.446	0	0.534	0	0.286	177.601	166.185	187.144	0	0.587	0.793
BGIBMGA014618	turquoise	CK_hemocyte,Toxin_fatbody,Toxin_midgut	gi|113676411|ref|NP_001037396.1| heat shock protein 70 [Bombyx mori] gi|87248163|gb|ABD36134.1| heat shock protein 70 [Bombyx mori]	8e-151	92.47	4.4308	5.53055	2.46931e-59	8.06923e-57	2.94693	3.36261	1.05028e-09	9.30233e-08	NA	NA	NA	NA	-2.24941	7.80291	2.92504e-38	2.19431e-35	264.81	320.928	291.923	239.224	249.712	228.92	4.497	4.321	5.722	2.601	2.843	3.217	61.799	61.707	63.326	195.152	198.048	201.43	111.418	107.94	108.138	26.332	26.581	21.387

## Sheet: 工作表5
gene	treatment	sample
BGIBMGA014339	CK	blood
BGIBMGA012559	CK	blood
BGIBMGA008339	CK	blood
BGIBMGA012389	CK	blood
BGIBMGA006944	CK	blood
BGIBMGA014618	CK	blood
BGIBMGA011899	CK	blood
BGIBMGA004614	CK	blood
BGIBMGA003135	CK	blood
BGIBMGA011266	CK	blood
BGIBMGA005897	CK	blood
BGIBMGA009376	CK	blood
BGIBMGA008035	CK	blood
BGIBMGA008810	CK	blood
BGIBMGA008344	CK	blood
BGIBMGA007254	CK	blood
BGIBMGA009490	CK	blood
BGIBMGA006518	CK	blood
BGIBMGA004894	CK	blood
BGIBMGA008064	CK	blood
BGIBMGA003402	CK	blood
BGIBMGA003645	CK	blood
BGIBMGA002349	CK	blood
BGIBMGA009882	CK	blood
BGIBMGA002971	CK	blood
BGIBMGA013924	CK	blood
