# Supplementary material for: Gene Expression Pattern and Regulatory Network of α-Toxin Treatment in Bombyx mori
Source: Int J Genomics. 2019 Mar 5;2019:7859121. doi: 10.1155/2019/7859121 (PMC6425383; doi:10.1155/2019/7859121)
Supplement: Supplementary 6 — Table 6: go enrichment analysis for the upregulated and downregulated genes in the fatbody and hemocyte. [file 7859121.f6.xls]

## Sheet: Table 1
fatbody									midgut
	ontology	category	go term	gene id	annotation	logFC				ontology	category	go term	gene id	annotation	logFC
down-regulated	BP	GO:0017038	protein import	BGIBMGA009572	protein translocase subunit secA	-1.31337			down-regulated	BP	GO:0006030	chitin metabolic process	BGIBMGA007678	chitinase 3-like	-1.19136
		GO:0006139	nucleobase-containing compound metabolic process	BGIBMGA002721	deoxynucleoside kinase	-1.18294				BP	GO:0006030	chitin metabolic process	BGIBMGA007899	chitinase 3-like	-1.46104
		GO:0006139	nucleobase-containing compound metabolic process	BGIBMGA003909	deoxynucleoside kinase-like isoform X1	-1.08338				BP	GO:0006030	chitin metabolic process	BGIBMGA006214	very low-density lipoprotein receptor isoform 1 precursor	-1.10807
		GO:0006545	glycine biosynthetic process	BGIBMGA013340	dihydrofolate reductase	-1.38818				BP	GO:0006030	chitin metabolic process	BGIBMGA007677	gasp precursor	-1.02284
		GO:0009165	nucleotide biosynthetic process	BGIBMGA013340	dihydrofolate reductase	-1.38818				BP	GO:0006030	chitin metabolic process	BGIBMGA006213	chitin deacetylase 1	-1.04989
		GO:0045947	negative regulation of translational initiation	BGIBMGA007466	eukaryotic translation initiation factor 4E-binding protein 2	-1.62086				BP	GO:0030001	metal ion transport	BGIBMGA004955	serine protease inhibitor 13 precursor	-1.29991
		GO:0044267	cellular protein metabolic process	BGIBMGA009699	T-complex protein 1 subunit epsilon-like	-1.22788				BP	GO:0030001	metal ion transport	BGIBMGA005005	zinc transporter ZIP1-like	-1.38485
		GO:0044267	cellular protein metabolic process	BGIBMGA011508	T-complex protein 1 subunit theta	-1.1376				BP	GO:0019538	protein metabolic process	BGIBMGA011834	methionine sulfoxide reductase	-1.07208
	CC	GO:0005945	6-phosphofructokinase complex	BGIBMGA003717	6-phosphofructokinase-like isoform X2	-1.42417				BP	GO:0042254	ribosome biogenesis	BGIBMGA005564	ribosome biogenesis regulatory protein homolog	-1.07497
	MF	GO:0000166	nucleotide binding	BGIBMGA003396	DNA polymerase alpha catalytic subunit-like	-1.03795				MF	GO:0008061	chitin binding	BGIBMGA007678	chitinase 3-like	-1.19136
		GO:0000166	nucleotide binding	BGIBMGA013200	GPN-loop GTPase 3-like	-1.00041				MF	GO:0008061	chitin binding	BGIBMGA007899	chitinase 3-like	-1.46104
		GO:0004347	glucose-6-phosphate isomerase activity	BGIBMGA004221	glucose-6-phosphate isomerase	-1.20392				MF	GO:0008061	chitin binding	BGIBMGA006214	very low-density lipoprotein receptor isoform 1 precursor	-1.10807
		GO:0003872	6-phosphofructokinase activity	BGIBMGA003717	6-phosphofructokinase-like isoform X2	-1.42417				MF	GO:0008061	chitin binding	BGIBMGA007677	gasp precursor	-1.02284
		GO:0004645	phosphorylase activity	BGIBMGA010361	muscle glycogen phosphorylase	-1.41632				MF	GO:0008061	chitin binding	BGIBMGA006213	chitin deacetylase 1	-1.04989
		GO:0003887	DNA-directed DNA polymerase activity	BGIBMGA003396	DNA polymerase alpha catalytic subunit-like	-1.03795				MF	GO:0016810	hydrolase activity, acting on carbon-nitrogen (but not peptide) bonds	BGIBMGA006214	very low-density lipoprotein receptor isoform 1 precursor	-1.10807
		GO:0003887	DNA-directed DNA polymerase activity	BGIBMGA013112	DNA polymerase V-like	-1.03782				MF	GO:0016810	hydrolase activity, acting on carbon-nitrogen (but not peptide) bonds	BGIBMGA013758	chitin binding PM protein	-1.3338
		GO:0004146	dihydrofolate reductase activity	BGIBMGA013340	dihydrofolate reductase	-1.38818				MF	GO:0016810	hydrolase activity, acting on carbon-nitrogen (but not peptide) bonds	BGIBMGA006213	chitin deacetylase 1	-1.04989
		GO:0008190	eukaryotic initiation factor 4E binding	BGIBMGA007466	eukaryotic translation initiation factor 4E-binding protein 2	-1.62086				MF	GO:0016758	transferase activity, transferring hexosyl groups	BGIBMGA001338	UDP-glycosyltransferase UGT41A1 precursor	-1.7637
		GO:0003697	single-stranded DNA binding	BGIBMGA000977	mitochondrial single-stranded DNA-binding protein	-7.40525				MF	GO:0016758	transferase activity, transferring hexosyl groups	BGIBMGA010098	UDP-glycosyltransferase UGT40B1	-1.12797
up-regulated	BP	GO:0009253	peptidoglycan catabolic process	BGIBMGA012866	peptidoglycan recognition protein S6 precursor	3.31238				MF	GO:0016758	transferase activity, transferring hexosyl groups	BGIBMGA010288	UDP-glycosyltransferase UGT40P1	-2.43057
		GO:0009253	peptidoglycan catabolic process	BGIBMGA007987	peptidoglycan recognition protein S2	5.05133				MF	GO:0016758	transferase activity, transferring hexosyl groups	BGIBMGA003835	UDP-glycosyltransferase UGT41A3 precursor	-1.23674
		GO:0009253	peptidoglycan catabolic process	BGIBMGA012864	peptidoglycan recognition protein precursor	6.20324				MF	GO:0004497	monooxygenase activity	BGIBMGA001573	cytochrome P450	-1.23365
		GO:0006559	L-phenylalanine catabolic process	BGIBMGA007324	homogentisate 1,2-dioxygenase-like	1.41039				MF	GO:0004497	monooxygenase activity	BGIBMGA012089	cytochrome P450	-1.98588
		GO:0006570	tyrosine metabolic process	BGIBMGA007324	homogentisate 1,2-dioxygenase-like	1.41039				MF	GO:0004497	monooxygenase activity	BGIBMGA006785	cytochrome P450 6j1	-2.79715
		GO:0006672	ceramide metabolic process	BGIBMGA003546	alkaline ceramidase-like isoform X1	1.76089				MF	GO:0004497	monooxygenase activity	BGIBMGA013238	cytochrome P450 CYP6AE7	-1.24835
	CC	GO:0005576	extracellular region	BGIBMGA001347	fibroin P25	2.19794				MF	GO:0004497	monooxygenase activity	BGIBMGA005015	flavin-dependent monooxygenase FMO1	-1.22439
		GO:0005576	extracellular region	BGIBMGA004464	30K protein 8	9.74354				MF	GO:0004497	monooxygenase activity	BGIBMGA006916	cytochrome P450 18a1	-1.72986
		GO:0005576	extracellular region	BGIBMGA000038	cecropin-B precursor	7.80432				MF	GO:0046873	metal ion transmembrane transporter activity	BGIBMGA004955	serine protease inhibitor 13 precursor	-1.29991
		GO:0005576	extracellular region	BGIBMGA006381	AGAP009480-PA	4.55135				MF	GO:0046873	metal ion transmembrane transporter activity	BGIBMGA005005	zinc transporter ZIP1-like	-1.38485
		GO:0005576	extracellular region	BGIBMGA000023	cecropin-B precursor	7.9527				MF	GO:0008113	peptide-methionine (S)-S-oxide reductase activity	BGIBMGA011834	methionine sulfoxide reductase	-1.07208
		GO:0005576	extracellular region	BGIBMGA000036	cecropin-B precursor	7.218				MF	GO:0003697	single-stranded DNA binding	BGIBMGA000977	mitochondrial single-stranded DNA-binding protein	-6.89523
		GO:0005576	extracellular region	BGIBMGA002747	attacin precursor	3.86039				MF	GO:0020037	heme binding	BGIBMGA001573	cytochrome P450	-1.23365
		GO:0005576	extracellular region	BGIBMGA000039	antibacterial peptide enbocin 2 precursor	2.80745				MF	GO:0020037	heme binding	BGIBMGA012089	cytochrome P450	-1.98588
		GO:0005576	extracellular region	BGIBMGA000037	cecropin-B precursor	7.4738				MF	GO:0020037	heme binding	BGIBMGA006785	cytochrome P450 6j1	-2.79715
		GO:0005576	extracellular region	BGIBMGA000017	cecropin-D precursor	6.96834				MF	GO:0020037	heme binding	BGIBMGA013238	cytochrome P450 CYP6AE7	-1.24835
		GO:0005576	extracellular region	BGIBMGA000020	cecropin-A-like	5.60555				MF	GO:0020037	heme binding	BGIBMGA006916	cytochrome P450 18a1	-1.72986
		GO:0005576	extracellular region	BGIBMGA000021	cecropin-B precursor	8.2719			up-regulated	BP	GO:0009253	peptidoglycan catabolic process	BGIBMGA000583	peptidoglycan-recognition protein 2-like	1.33707
		GO:0005576	extracellular region	BGIBMGA006280	cecropin-A precursor	8.23708				BP	GO:0009253	peptidoglycan catabolic process	BGIBMGA012866	peptidoglycan recognition protein S6 precursor	4.79254
		GO:0005576	extracellular region	BGIBMGA014285	cecropin-A precursor	9.85646				BP	GO:0009253	peptidoglycan catabolic process	BGIBMGA012865	peptidoglycan-recognition protein LB-like	7.19232
		GO:0005576	extracellular region	BGIBMGA012221	melanotransferrin-like	1.51449				BP	GO:0006559	L-phenylalanine catabolic process	BGIBMGA007324	homogentisate 1,2-dioxygenase-like	1.06781
		GO:0005576	extracellular region	BGIBMGA011495	Moricin-1	8.52311				BP	GO:0006570	tyrosine metabolic process	BGIBMGA007324	homogentisate 1,2-dioxygenase-like	1.06781
		GO:0005576	extracellular region	BGIBMGA010439	lysozyme precursor	6.47237				BP	GO:0006672	ceramide metabolic process	BGIBMGA003546	alkaline ceramidase-like isoform X1	1.5091
		GO:0005576	extracellular region	BGIBMGA000024	cecropin-B precursor	8.42807				BP	GO:0006626	protein targeting to mitochondrion	BGIBMGA008507	mitochondrial import inner membrane translocase subunit Tim9A	3.79468
		GO:0005576	extracellular region	BGIBMGA002739	attacin-like	5.82818				BP	GO:0006626	protein targeting to mitochondrion	BGIBMGA003070	mitochondrial import inner membrane translocase subunit Tim13-like	7.73422
		GO:0005576	extracellular region	BGIBMGA004463	microvitellogenin-like	7.65299				BP	GO:0045039	protein import into mitochondrial inner membrane	BGIBMGA008507	mitochondrial import inner membrane translocase subunit Tim9A	3.79468
		GO:0005576	extracellular region	BGIBMGA004398	30K protein 24	1.06164				BP	GO:0045039	protein import into mitochondrial inner membrane	BGIBMGA003070	mitochondrial import inner membrane translocase subunit Tim13-like	7.73422
		GO:0005576	extracellular region	BGIBMGA000018	antibacterial peptide enbocin 3 precursor	3.78721				BP	GO:0007169	transmembrane receptor protein tyrosine kinase signaling pathway	BGIBMGA003654	insulin receptor precursor	1.62013
		GO:0016459	myosin complex	BGIBMGA014226	myosin heavy chain	2.4766				CC	GO:0042719	mitochondrial intermembrane space protein transporter complex	BGIBMGA008507	mitochondrial import inner membrane translocase subunit Tim9A	3.79468
		GO:0016459	myosin complex	BGIBMGA014227	AGAP010147-PA	2.26408				CC	GO:0042719	mitochondrial intermembrane space protein transporter complex	BGIBMGA003070	mitochondrial import inner membrane translocase subunit Tim13-like	7.73422
		GO:0016459	myosin complex	BGIBMGA000613	miniparamyosin	2.60854				CC	GO:0000139	Golgi membrane	BGIBMGA003546	alkaline ceramidase-like isoform X1	1.5091
		GO:0016459	myosin complex	BGIBMGA000612	paramyosin	2.59012				MF	GO:0008745	N-acetylmuramoyl-L-alanine amidase activity	BGIBMGA000583	peptidoglycan-recognition protein 2-like	1.33707
	MF	GO:0008440	inositol-1,4,5-trisphosphate 3-kinase activity	BGIBMGA009298	inositol 1	1.40025				MF	GO:0008745	N-acetylmuramoyl-L-alanine amidase activity	BGIBMGA012866	peptidoglycan recognition protein S6 precursor	4.79254
		GO:0008440	inositol-1,4,5-trisphosphate 3-kinase activity	BGIBMGA008451	inositol-trisphosphate 3-kinase B-like	1.19939				MF	GO:0008745	N-acetylmuramoyl-L-alanine amidase activity	BGIBMGA012865	peptidoglycan-recognition protein LB-like	7.19232
		GO:0005215	transporter activity	BGIBMGA010741	facilitated trehalose transporter Tret1-like	2.673				MF	GO:0004411	homogentisate 1,2-dioxygenase activity	BGIBMGA007324	homogentisate 1,2-dioxygenase-like	1.06781
		GO:0005215	transporter activity	BGIBMGA010162	facilitated trehalose transporter Tret1-like	1.11899				MF	GO:0004607	phosphatidylcholine-sterol O-acyltransferase activity	BGIBMGA003771	group XV phospholipase A2-like	1.36141
		GO:0005215	transporter activity	BGIBMGA004510	facilitated trehalose transporter Tret1-like	1.43641				MF	GO:0016811	hydrolase activity	BGIBMGA003546	alkaline ceramidase-like isoform X1	1.5091
		GO:0005215	transporter activity	BGIBMGA003964	sodium-independent sulfate anion transporter-like	1.72757				MF	GO:0004396	hexokinase activity	BGIBMGA004595	putative hexokinase HKDC1-like	1.25135
		GO:0005215	transporter activity	BGIBMGA010742	facilitated trehalose transporter Tret1-like	4.62703				MF	GO:0008440	inositol-1,4,5-trisphosphate 3-kinase activity	BGIBMGA007362	inositol polyphosphate multikinase-like	1.12435
		GO:0005215	transporter activity	BGIBMGA006642	solute carrier family 2	1.09419				MF	GO:0005006	epidermal growth factor-activated receptor activity	BGIBMGA003654	insulin receptor precursor	1.62013
		GO:0005215	transporter activity	BGIBMGA003935	sodium-independent sulfate anion transporter-like	2.49685				NA	GO:0004182	none	BGIBMGA009476	carboxypeptidase A2-like	1.03243
		GO:0005215	transporter activity	BGIBMGA004525	sugar transporter protein	1.89316				NA	GO:0004182	none	BGIBMGA004801	zinc carboxypeptidase-like	1.02856
		GO:0005215	transporter activity	BGIBMGA013656	solute carrier family 2	1.04588
		GO:0005215	transporter activity	BGIBMGA012587	solute carrier family 22 member 5-like	2.80745
		GO:0005215	transporter activity	BGIBMGA014055	facilitated trehalose transporter Tret1-2 homolog	2.79323
		GO:0008745	N-acetylmuramoyl-L-alanine amidase activity	BGIBMGA012866	peptidoglycan recognition protein S6 precursor	3.31238
		GO:0008745	N-acetylmuramoyl-L-alanine amidase activity	BGIBMGA007987	peptidoglycan recognition protein S2	5.05133
		GO:0008745	N-acetylmuramoyl-L-alanine amidase activity	BGIBMGA012864	peptidoglycan recognition protein precursor	6.20324
		GO:0004411	homogentisate 1,2-dioxygenase activity	BGIBMGA007324	homogentisate 1,2-dioxygenase-like	1.41039
		GO:0003774	motor activity	BGIBMGA014226	myosin heavy chain	2.4766
		GO:0003774	motor activity	BGIBMGA014227	AGAP010147-PA	2.26408
		GO:0003774	motor activity	BGIBMGA000613	miniparamyosin	2.60854
		GO:0003774	motor activity	BGIBMGA000612	paramyosin	2.59012
		GO:0016811	hydrolase activity	BGIBMGA003546	alkaline ceramidase-like isoform X1	1.76089
hemocyte									cell
	ontology	category	go term	gene id	annotation	logFC				ontology	category	go term	gene id	annotation	logFC
down-regulated	BP	GO:0015746	citrate transport	BGIBMGA011391	P protein-like	-1.18756			down-regulated	BP	GO:0006465	signal peptide processing	BGIBMGA001136	signal peptidase complex subunit 3	-5.96378
	BP	GO:0015746	citrate transport	BGIBMGA011390	P protein-like	-1.04504					GO:0006313	transposition, DNA-mediated	BGIBMGA010192	nuclease HARBI1-like	-7.04814
	BP	GO:0005992	trehalose biosynthetic process	BGIBMGA005181	alpha,alpha-trehalose-phosphate synthase [UDP-forming] A-like	-2.37569				CC	GO:0005787	signal peptidase complex	BGIBMGA001136	signal peptidase complex subunit 3	-5.96378
	BP	GO:0005992	trehalose biosynthetic process	BGIBMGA005182	alpha,alpha-trehalose-phosphate synthase [UDP-forming] A-like	-1.95216				MF	GO:0004803	transposase activity	BGIBMGA010192	putative nuclease HARBI1-like	-7.04814
	BP	GO:0006597	spermine biosynthetic process	BGIBMGA007423	S-adenosylmethionine decarboxylase proenzyme-like	-1.18297					GO:0016652	oxidoreductase activity	BGIBMGA007159	probable isocitrate dehydrogenase [NAD] subunit α	-5.31482
	BP	GO:0008295	spermidine biosynthetic process	BGIBMGA007423	S-adenosylmethionine decarboxylase proenzyme-like	-1.18297			up-regulated	BP	GO:0006446	regulation of translational initiation	BGIBMGA007711	tRNA (adenine(58)-N(1))-methyltransferase non-catalytic subunit TRM6-like	7.32717
	MF	GO:0015137	citrate transmembrane transporter activity	BGIBMGA011391	P protein-like	-1.18756					GO:0030001	metal ion transport	BGIBMGA002971	histidine-rich membrane protein KE4 homolog 2-like	8.02391
	MF	GO:0015137	citrate transmembrane transporter activity	BGIBMGA011390	P protein-like	-1.04504				MF	GO:0004750	ribulose-phosphate 3-epimerase activity	BGIBMGA002461	ribulose-phosphate 3-epimerase-like	2.06269
	MF	GO:0003825	alpha,alpha-trehalose-phosphate synthase (UDP-forming) activity	BGIBMGA005181	alpha,alpha-trehalose-phosphate synthase [UDP-forming] A-like	-2.37569					GO:0016772	transferase activity	BGIBMGA005812	arginine kinase isoform 2	7.11002
	MF	GO:0003825	alpha,alpha-trehalose-phosphate synthase (UDP-forming) activity	BGIBMGA005182	alpha,alpha-trehalose-phosphate synthase [UDP-forming] A-like	-1.95216					GO:0016301	kinase activity	BGIBMGA005812	arginine kinase isoform 2	7.11002
	MF	GO:0005344	oxygen transporter activity	BGIBMGA009027	silkworm storage protein	-3.25645					GO:0046873	metal ion transmembrane transporter activity	BGIBMGA002971	histidine-rich membrane protein KE4 homolog 2-like	8.02391
	MF	GO:0005344	oxygen transporter activity	BGIBMGA011266	Methionine-rich storage protein	-1.68189
	MF	GO:0005344	oxygen transporter activity	BGIBMGA009028	sex-specific storage-protein 2 precursor	-3.84947
	MF	GO:0008237	metallopeptidase activity	BGIBMGA011000	aminoacylase-1-like isoform X2	-1.57639
	MF	GO:0008237	metallopeptidase activity	BGIBMGA000529	neutral endopeptidase 24.11	-1.05533
	MF	GO:0008237	metallopeptidase activity	BGIBMGA011002	aminoacylase-1-like	-1.79937
	MF	GO:0004014	adenosylmethionine decarboxylase activity	BGIBMGA007423	S-adenosylmethionine decarboxylase proenzyme-like	-1.18297
up-regulated	BP	GO:0016310	phosphorylation	BGIBMGA002683	putative phosphoenolpyruvate synthase-like	4.29427
	BP	GO:0016310	phosphorylation	BGIBMGA002682	Putative phosphoenolpyruvate synthase	4.43746
	BP	GO:0009253	peptidoglycan catabolic process	BGIBMGA012866	Bacteriophage T7 lysozyme-like protein 1 (BTL-LP1)	2.28444
	BP	GO:0009253	peptidoglycan catabolic process	BGIBMGA007987	peptidoglycan recognition protein S2	1.27143
	BP	GO:0009253	peptidoglycan catabolic process	BGIBMGA012864	peptidoglycan recognition protein	1.12859
	BP	GO:0000270	peptidoglycan metabolic process	BGIBMGA007804	matrix metalloproteinase variant 1	3.55816
	BP	GO:0019438	aromatic compound biosynthetic process	BGIBMGA001235	GTP cyclohydrolase I isoform B	4.14587
	BP	GO:0015976	carbon utilization	BGIBMGA003357	beta carbonic anhydrase 1-like	1.03919
	BP	GO:0030001	metal ion transport	BGIBMGA012371	zinc transporter ZIP3-like	1.02667
	BP	GO:0030001	metal ion transport	BGIBMGA005005	zinc transporter ZIP1-like	1.14119
	BP	GO:0006809	nitric oxide biosynthetic process	BGIBMGA002938	nitric oxide synthase	2.8961
	CC	GO:0005732	small nucleolar ribonucleoprotein complex	BGIBMGA006056	probable H/ACA ribonucleoprotein complex subunit 1-like	6.62145
	MF	GO:0008745	N-acetylmuramoyl-L-alanine amidase activity	BGIBMGA012866	peptidoglycan recognition protein S6 precursor	2.28444
	MF	GO:0008745	N-acetylmuramoyl-L-alanine amidase activity	BGIBMGA007987	peptidoglycan recognition protein S2	1.27143
	MF	GO:0008745	N-acetylmuramoyl-L-alanine amidase activity	BGIBMGA012864	peptidoglycan recognition protein precursor	1.12859
	MF	GO:0003934	GTP cyclohydrolase I activity	BGIBMGA001235	GTP cyclohydrolase I isoform B	4.14587
	MF	GO:0046873	metal ion transmembrane transporter activity	BGIBMGA012371	zinc transporter ZIP3-like	1.02667
	MF	GO:0046873	metal ion transmembrane transporter activity	BGIBMGA005005	zinc transporter ZIP1-like	1.14119
	MF	GO:0004517	nitric-oxide synthase activity	BGIBMGA002938	nitric oxide synthase	2.8961
	MF	GO:0004396	hexokinase activity	BGIBMGA011477	hexokinase type 2-like isoform X2	1.20459
	MF	GO:0019843	rRNA binding	BGIBMGA006056	probable H/ACA ribonucleoprotein complex subunit 1-like	6.62145
