# Supplementary material for: Gene Expression Pattern and Regulatory Network of α-Toxin Treatment in Bombyx mori
Source: Int J Genomics. 2019 Mar 5;2019:7859121. doi: 10.1155/2019/7859121 (PMC6425383; doi:10.1155/2019/7859121)
Supplement: Supplementary 7 — Table 7: differential expression analysis results of lncRNAs. [file 7859121.f7.xls]

## Sheet: Table 1
	fatbody				midgut				hemocyte				cell				TMM value
id	logFC	logCPM	PValue	FDR	logFC	logCPM	PValue	FDR	logFC	logCPM	PValue	FDR	logFC	logCPM	PValue	FDR	CK_hemocyte_1	CK_hemocyte-2	CK_hemocyte-3	CK_cell-1	CK_cell-2	CK_cell-3	CK_fatbody-1	CK_fatbody-2	CK_fatbody-3	CK_midgut-1	CK_midgut-2	CK_midgut-3	Toxin_hemocyte-1	Toxin_hemocyte-2	Toxin_hemocyte-3	Toxin_cell-1	Toxin_cell-2	Toxin_cell-3	Toxin_fatbody-1	Toxin_fatbody-2	Toxin_fatbody-3	Toxin_midgut-1	Toxin_midgut-2	Toxin_midgut-3
bmlnct_3734	NA	NA	NA	NA	2.37451	4.18126	0.00197187	0.0398996	NA	NA	NA	NA	NA	NA	NA	NA	43.831	21.828	15.94	70.189	91.668	101.665	23.548	7.437	33.574	15.698	24.002	0	34.855	40.142	5.752	67.297	65.816	117.579	29.509	5.907	35.707	83.697	43.334	79.603
BP123594	1.99159	3.82125	0.000514474	0.006917	NA	NA	NA	NA	NA	NA	NA	NA	NA	NA	NA	NA	424.719	491.76	541.264	1.536	1.6	1.603	6.999	4.106	4.089	159.163	191.776	126.768	511.412	434.986	445.913	1.884	0	1.565	21.19	17.422	27.633	222.36	198.614	268.847
bmlnct_2967	NA	NA	NA	NA	1.70085	7.01345	3.36e-16	8.22e-14	NA	NA	NA	NA	NA	NA	NA	NA	198.802	163.987	147.933	15.382	33.611	5.119	33.31	37.7	22.192	127.351	75.04	101.398	165.641	143.735	174.362	11.705	27.115	26.508	61.768	56.333	59.1	335.202	319.345	330.877
bmlnct_1127	2.8895	4.48765	1.92e-08	9.89e-07	NA	NA	NA	NA	NA	NA	NA	NA	NA	NA	NA	NA	36.117	24.841	20.418	11.893	9.876	11.15	7.595	3.165	1.053	0	0	1.341	34.947	26.622	27.028	10.201	9.506	12.057	29.838	36.29	28.925	0	1.675	3.583
SilkDB_TCONS_00160208	NA	NA	NA	NA	-1.80995	7.79674	5.25e-25	4.83e-22	NA	NA	NA	NA	NA	NA	NA	NA	41.787	58.749	38.874	68.028	79.956	66.141	102.055	74.562	93.013	175.319	201.545	207.889	48.201	39.656	35.055	67.735	87.984	72.651	64.44	68.698	70.847	61.116	58.67	50.523
bmlnct_2606	NA	NA	NA	NA	6.46906	3.89627	0.000336484	0.00909002	-6.12417	3.58161	0.00102644	0.0319399	NA	NA	NA	NA	66.475	93.121	0.231	0	0	0	0	0	0	0	0	0	0	0	0	129.066	0	0	0	0	0	122.943	119.678	0
AK378996	NA	NA	NA	NA	1.16567	6.69064	1.08e-06	5.74e-05	NA	NA	NA	NA	NA	NA	NA	NA	9.465	7.551	9.83	168.722	182.552	165.682	90.539	106.646	86.538	13.817	18.96	12.997	11.271	6.036	11.776	210.028	200.673	203.616	93.619	84.124	92.701	31.641	31.336	42.139
bmlnct_4310	-1.07609	6.52367	4.41e-06	0.000109727	NA	NA	NA	NA	NA	NA	NA	NA	NA	NA	NA	NA	387.749	500.509	493.591	525.522	653.927	579.137	346.788	514.188	554.943	284.81	293.721	230.345	366.07	264.662	399.628	593.295	497.277	608.361	248.756	190.443	270.595	217.421	374.192	274.068
SilkDB_TCONS_00180735	-1.19599	5.44168	0.000764992	0.00977539	NA	NA	NA	NA	NA	NA	NA	NA	NA	NA	NA	NA	38.738	63.487	49.578	95.56	87.943	103.258	22.11	31.091	19.19	62.768	47.595	58.403	65.317	51.056	55.905	101.593	107.761	118.211	8.989	17.083	7.449	44.769	52.54	44.669
bmlnct_2665	-1.1241	9.04955	4.5e-20	1.52e-17	NA	NA	NA	NA	NA	NA	NA	NA	NA	NA	NA	NA	427.491	483.156	480.125	550.587	603.486	551.326	543.65	560.69	578.311	319.156	307.955	283.842	431.01	440.298	419.362	579.753	615.803	558.446	286.82	266.422	267.85	342.329	351.619	420.224
bmlnct_2007	-1.02725	6.36008	8.75e-07	2.82e-05	NA	NA	NA	NA	NA	NA	NA	NA	NA	NA	NA	NA	30.482	47.386	52.761	123.34	106.353	117.534	162.609	132.121	144.847	10.401	12.634	14.021	55.147	84.174	63.336	97.758	142.659	225.703	76.404	83.67	66.868	15.507	18.612	34.043
bmlnct_0967	3.58138	3.12044	0.000331042	0.00472625	NA	NA	NA	NA	NA	NA	NA	NA	NA	NA	NA	NA	0	0	182.659	0	0	0	0	29.022	0	0	0	0	0	0	0	0	0	0	63.439	182.922	180.624	0	0	0
bmlnct_4115	NA	NA	NA	NA	NA	NA	NA	NA	-1.19239	5.9534	0.00025892	0.0101626	NA	NA	NA	NA	767.259	494.701	486.705	539.754	496.895	495.915	287.941	380.072	341.448	258.617	285.032	358.082	197.666	221.345	291.251	470.319	501.643	582.645	325.699	225.529	199.632	254.224	309.297	252.913
bmlnct_3854	NA	NA	NA	NA	NA	NA	NA	NA	-1.51035	6.87724	5.18e-10	5.77e-08	NA	NA	NA	NA	282.171	366.837	404.002	35.025	44.044	58.527	40.77	41.01	28.04	38.119	29.826	51.29	126.57	135.494	99.37	51.796	44.181	71.181	42.71	42.48	36.781	37.005	14.631	36.946
bmlnct_3864	NA	NA	NA	NA	NA	NA	NA	NA	2.53722	3.8925	0.001222	0.0370243	NA	NA	NA	NA	14.566	10.483	0.569	156.254	154.473	148.521	72.867	57.424	73.969	91.588	72.565	77.024	45.975	62.149	47.845	128.238	106.222	161.564	93.435	114.662	134.419	48.062	52.181	46.662
bmlnct_2120	-1.70549	5.38707	7.5e-09	4.38e-07	NA	NA	NA	NA	NA	NA	NA	NA	NA	NA	NA	NA	20.085	10.755	19.33	20.238	27.151	32.539	106.694	93.738	96.273	12.401	32.254	17.345	17.545	20.058	11.307	24.085	14.22	25.801	29.877	32.508	33.136	9.23	25.554	25.161
bmlnct_2832	1.14319	7.56649	2.45e-12	2.75e-10	NA	NA	NA	NA	NA	NA	NA	NA	NA	NA	NA	NA	7.572	18.987	15.165	34.46	43.971	32.65	132.927	111.476	149.115	19.064	47.372	24.737	5.308	12.243	12.457	17.291	39.37	23.831	317.21	293.292	312.69	16.962	28.555	9.438
bmlnct_0848	NA	NA	NA	NA	3.20764	4.61378	2.89e-06	0.000139697	NA	NA	NA	NA	NA	NA	NA	NA	0	0	0	0	0	0	1.045	0.662	0.336	2.272	0.456	0.587	0	0	0	0	0	0	3.356	0.326	0.799	10.388	7.447	11.373
SilkDB_TCONS_00144890	-4.96292	2.22115	0.00497944	0.0440177	NA	NA	NA	NA	NA	NA	NA	NA	NA	NA	NA	NA	0	1.842	0	0	0	3.496	3.842	2.172	2.229	2.534	0	0.95	0	0	0	0	0	0	0.013	0	0	0	1.18	0
bmlnct_1797	-1.03651	7.78327	6.3e-13	7.67e-11	NA	NA	NA	NA	NA	NA	NA	NA	NA	NA	NA	NA	32.091	29.043	29.753	16.829	14.581	17.412	49.679	52.056	50.747	25.997	24.793	17.773	26.826	29.466	23.483	21.221	16.118	18.589	26.771	25.51	26.834	22.252	24.374	18.339
bmlnct_2554	-1.03073	5.09451	0.00230521	0.0240567	NA	NA	NA	NA	NA	NA	NA	NA	NA	NA	NA	NA	15.375	15.048	23.098	5.629	4.375	10.97	28.693	34.225	33.775	14.791	19.22	28.713	16.848	17.776	20.672	10.334	13.223	10.671	19.321	12.196	18.906	26.777	21.825	14.276
bmlnct_4251	-1.25613	8.28122	1.19e-19	3.47e-17	NA	NA	NA	NA	NA	NA	NA	NA	NA	NA	NA	NA	827.904	882.394	903.473	17.403	17.12	32.66	604.002	645.161	664.771	690.739	851.458	773.133	828.013	810.078	810.35	46	13.853	15.705	292.413	298.023	258.179	728.695	725.052	675.465
bmlnct_2491	-1.02776	7.34384	4.14e-07	1.52e-05	NA	NA	NA	NA	NA	NA	NA	NA	NA	NA	NA	NA	899.435	1156.29	1098.43	1012.19	895.528	820.447	740.154	1084.23	753.415	458.645	574.827	342.366	733.501	939.987	978.313	771.463	1061.76	691.655	523.309	395.32	416.311	229.296	384.525	377.548
bmlnct_2933	-1.10045	8.78584	4.78e-14	7.48e-12	NA	NA	NA	NA	NA	NA	NA	NA	NA	NA	NA	NA	871.841	835.326	893.099	681.905	758.051	667.368	3123.48	2695.12	2710.61	637.999	653.03	724.542	760.764	689.338	825.816	558.143	707.311	685.084	1488.09	1483.09	1231.23	579.293	638.29	651.971
bmlnct_3437	6.46726	3.23302	0.00498125	0.0440177	NA	NA	NA	NA	NA	NA	NA	NA	NA	NA	NA	NA	136.14	0	0	0	0	0	0	0	0	0	0	0	0	0	0	0	0	0	0	105.101	0	0	0	0
SilkDB_TCONS_00398303	NA	NA	NA	NA	NA	NA	NA	NA	1.00546	5.99122	0.000570224	0.0195005	NA	NA	NA	NA	122.872	115.847	83.644	0	0	0	3.999	8.15	8.021	14.13	5.489	5.065	228.363	182.957	219.284	0	0	0	7.331	3.881	0	23.463	12.482	6.774
AK387831	1.27408	5.08464	0.000538695	0.00722049	NA	NA	NA	NA	NA	NA	NA	NA	NA	NA	NA	NA	0.809	1.334	0	7.076	0.712	4.168	9.055	3.879	8.312	1.678	3.005	1.006	2.822	0.468	1.576	2.255	1.52	4.44	15.834	16.998	22.318	0.52	3.939	0
bmlnct_2763	NA	NA	NA	NA	1.46624	8.63056	3.62e-05	0.00137131	-3.24601	6.6398	1.83e-11	2.74e-09	NA	NA	NA	NA	264.779	467.772	533.62	68.742	235.058	123.044	0	0	0	176.336	672.706	808.474	51.804	0.026	78.784	200.588	0	160.857	0	0	0	1609.93	1541.5	1412.18
SilkDB_TCONS_00135444	2.75895	3.45002	0.00129291	0.0151116	NA	NA	NA	NA	NA	NA	NA	NA	NA	NA	NA	NA	0	0	0	0	2.167	0	0	0	2.14	0	2.912	2.728	0	1.32	0	0	0	0	4.014	4.221	7.696	0	0	0
bmlnct_3832	-4.54276	3.72649	0.000729236	0.00937314	NA	NA	NA	NA	-6.82794	4.11083	9.46e-05	0.0042987	NA	NA	NA	NA	105.249	0	98.545	0	11.186	23.303	122.928	0	71.124	0	16.569	24.626	0	0	0	0	12.575	0	8.555	0.028	0	24.461	114.938	0
SilkDB_TCONS_00253520	1.5245	4.10895	0.00385947	0.0359152	NA	NA	NA	NA	NA	NA	NA	NA	NA	NA	NA	NA	0	0	0	0	0	0	5.089	5.751	4.111	0	2.242	1.052	0	0	0	0	0	0	20.269	12.961	12.764	5.066	3.918	2.798
bmlnct_3096	1.25612	5.15716	0.00112817	0.0135473	NA	NA	NA	NA	NA	NA	NA	NA	NA	NA	NA	NA	52.575	19.169	18.084	52.468	60.08	34.904	17.009	23.83	31.479	108.753	47.195	35.174	42.38	46.697	23.731	74.834	74.306	64.375	39.353	66.729	81.462	18.672	32.727	23.637
AK381193	-1.29458	10.5406	3.64e-25	1.77e-22	NA	NA	NA	NA	NA	NA	NA	NA	NA	NA	NA	NA	461.893	519.678	526.255	452.677	494.862	465.609	513.216	612.643	530.253	1172.39	1078.44	1067.88	578.778	570.148	607.171	531.602	502.815	510.841	239.793	244.297	236.166	690.68	704.807	714.912
bmlnct_0596	NA	NA	NA	NA	1.37764	5.3636	0.000538066	0.0135401	NA	NA	NA	NA	NA	NA	NA	NA	39.903	51.18	63.456	37.909	20.185	22.952	49.994	50.329	30	33.109	22.03	27.084	58.54	35.698	46.754	44.602	36.495	32.993	75.759	59.605	41.588	82.614	71.952	58.207
bmlnct_2318	NA	NA	NA	NA	NA	NA	NA	NA	6.69506	3.98235	0.000141573	0.00611336	NA	NA	NA	NA	0	0	0	0	0	0	0	0	0	16.631	123.779	0	0	44.858	45.876	0	0	0	0	0	0	0	0	12.772
CN212094	1.63382	4.03127	0.00230804	0.0240567	NA	NA	NA	NA	NA	NA	NA	NA	NA	NA	NA	NA	0	0	0	0	0	0	12.043	13.88	5.904	0	0	0	0	0	0	0	0	0	26.995	40.511	39.772	0	0	0
bmlnct_0120	-1.03348	8.2958	1.12e-11	1.07e-09	NA	NA	NA	NA	NA	NA	NA	NA	NA	NA	NA	NA	78.81	72.708	72.989	24.341	17.822	21.639	74.957	88.329	83.502	52.503	64.955	53.459	94.041	86.481	91.761	21.059	21.829	22.454	46.869	43.769	37.42	34.159	33.538	47.352
SilkDB_TCONS_00476316	1.35068	7.60032	5.47e-17	1.2e-14	NA	NA	NA	NA	NA	NA	NA	NA	NA	NA	NA	NA	14.61	12.797	14.035	13.171	27.388	15.428	55.869	45.416	45.941	29.023	24.728	14.152	15.882	14.422	12.892	16.453	20.948	23.322	130.893	144.691	124.312	14.02	18.517	22.354
bmlnct_0743	-1.53761	5.27801	8.07e-06	0.000189113	NA	NA	NA	NA	NA	NA	NA	NA	NA	NA	NA	NA	71.078	35.605	55.903	49.306	67.717	44.962	439.72	329.774	329.988	0	12.159	53.413	63.361	21.08	14.605	144.634	37.221	73.632	173.471	149.182	82.071	15.932	47.073	42.379
bmlnct_2401	NA	NA	NA	NA	NA	NA	NA	NA	1.45633	5.87039	3.66e-05	0.0018316	NA	NA	NA	NA	11.331	20.267	14.423	11.843	7.317	7.023	10.718	6.402	8.626	5.493	9.731	7.057	41.893	55.1	30.454	13.056	11.51	9.87	13.109	14.065	22.943	6.522	9.733	4.072
bmlnct_1251	NA	NA	NA	NA	1.12847	7.03379	9.49e-09	6.84e-07	NA	NA	NA	NA	NA	NA	NA	NA	22.76	32.193	27.675	174.728	218.01	195.817	23.694	21.027	22.282	40.017	37.12	32.362	22.92	24.323	22.248	247.159	216.084	225.298	25.442	21.969	23.683	71.482	82.622	87.335
bmlnct_1817	-1.27615	5.34811	5.3e-05	0.000996233	NA	NA	NA	NA	NA	NA	NA	NA	NA	NA	NA	NA	41.671	37.657	25.828	90.843	79.801	96.566	42.388	36.138	30.381	44.807	51.503	50.238	48.209	48.843	35.83	105.552	87.81	93.984	18.755	12.139	16.684	40.51	50.833	27.911
bmlnct_1863	NA	NA	NA	NA	NA	NA	NA	NA	NA	NA	NA	NA	6.54694	3.68569	0.000429625	0.0375173	0	0	0	0	0	0	0	0	0	0	0	0	0	0	0	131.635	207.71	0	25.191	0	0	0	0	0
bmlnct_2384	NA	NA	NA	NA	NA	NA	NA	NA	1.23047	8.87955	1.06e-11	1.66e-09	NA	NA	NA	NA	28.456	31.666	37.233	6.145	6.15	2.685	27.019	28.867	24.925	31.202	26.058	25.315	79.637	79.483	70.612	5.091	4.743	3.214	31.417	27.054	24.192	48.136	50.896	51.654
bmlnct_1821	-6.56113	3.22662	1.83e-06	5.07e-05	NA	NA	NA	NA	NA	NA	NA	NA	NA	NA	NA	NA	0	0	0	0	0	33.661	137.073	56.162	57.244	0	0	31.701	30.21	0	0	0	36.785	0	0	0	0	0	0	0
bmlnct_0524	NA	NA	NA	NA	-1.78594	6.40447	1.58e-10	1.87e-08	-1.39599	8.76667	2.83e-14	8.15e-12	NA	NA	NA	NA	123.689	103.858	95.205	14.034	11.042	7.524	30.704	34.628	30.661	19.318	26.523	22.335	37.475	44.722	40.772	11.895	10.716	8.154	29.101	30.043	31.22	8.072	4.835	7.33
bmlnct_1173	NA	NA	NA	NA	NA	NA	NA	NA	7.53366	4.66421	3.1e-13	6.29e-11	NA	NA	NA	NA	0	0	0.61	91.903	0	0	0	0	76.098	90.614	0.707	0	77.773	88.686	126.773	0	0	83.077	0	0	0	0	0	0
bmlnct_3581	-1.43594	8.68109	9.52e-27	6.95e-24	NA	NA	NA	NA	NA	NA	NA	NA	NA	NA	NA	NA	185.143	222.591	205.386	30.03	61.081	21.81	829.39	904.831	813.09	402.709	480.65	524.381	226.096	190.296	225.36	65.841	41.238	31.174	350.707	340.956	308.726	418.973	475.742	440.365
bmlnct_4332	NA	NA	NA	NA	1.03134	12.5809	4.38e-13	7.66e-11	-1.4361	13.8962	5.02e-20	3.4e-17	NA	NA	NA	NA	2722.42	2760.24	3074.8	579.179	595.601	569.95	113.233	136.816	110.903	649.078	526.906	515.853	1095.36	1014.76	1063.44	791.037	610.556	724.403	267.314	242.243	226.902	1047.26	1117.74	1379.43
bmlnct_4047	NA	NA	NA	NA	1.25366	6.18204	2.48e-05	0.000979521	NA	NA	NA	NA	NA	NA	NA	NA	124.658	284.871	194.666	1662.78	1497.49	1866.76	259.742	521.47	472.415	230.679	207.443	243.984	346.232	341.302	329.05	1838.27	2038.11	1682.22	601.897	585.366	572.162	359.939	513.725	680.361
bmlnct_0070	NA	NA	NA	NA	1.18275	7.57146	4.04e-11	5.11e-09	NA	NA	NA	NA	NA	NA	NA	NA	418.48	492.885	380.92	268.395	164.555	229.489	247.25	397.158	472.09	235.044	266.742	314.314	451.856	425.425	511.788	184.192	190.024	226.683	379.939	399.937	503.13	678.2	612.442	570.989
bmlnct_1807	NA	NA	NA	NA	NA	NA	NA	NA	-3.68447	3.82367	9.85e-05	0.00437282	NA	NA	NA	NA	32.686	80.078	53.041	0	0	0	8.999	11.139	0	78.78	50.191	95.691	7.542	5.653	0	0	0	9.012	1.527	15.524	11.297	182.593	168.721	115.706
bmlnct_0024	1.0291	6.65319	2.7e-06	7.34e-05	NA	NA	NA	NA	NA	NA	NA	NA	-1.37919	5.80108	3.11e-05	0.00449345	0	0	30.702	408.247	342.556	527.883	327.475	410.687	551.246	120.629	53.949	247.038	47.613	19.735	31.11	147.517	190.499	156.408	1017.37	765.724	967.868	45.566	171.059	55.381
bmlnct_2322	-1.98894	11.0822	3.57e-60	1.56e-56	-1.04177	8.06833	3.84e-11	5.04e-09	NA	NA	NA	NA	NA	NA	NA	NA	122.774	80.414	98.446	473.391	426.248	431.918	1609.11	1700.9	1654.69	144.6	154.489	155.118	56.541	48.655	54.576	453.581	469.292	402.812	469.175	460.576	401.195	62.125	73.195	88.332
BY917794	NA	NA	NA	NA	-1.39126	6.71259	3.92e-09	3.13e-07	NA	NA	NA	NA	NA	NA	NA	NA	4.843	14.631	9.079	24.866	14.406	10.359	25.491	25.319	14.641	138.946	177.087	144.067	11.238	9.314	16.616	20.878	17.589	13.037	23.244	18.301	22.086	41.742	67.971	66.016
bmlnct_3428	6.4731	3.21019	0.000632901	0.0083054	NA	NA	NA	NA	NA	NA	NA	NA	NA	NA	NA	NA	0	0	0	137.711	125.372	0	0	0	0	0	0	0	0	0	0	0	0	0	0	218.432	54.932	0	405.401	0
bmlnct_3339	-6.71631	3.34675	3.04e-08	1.5e-06	NA	NA	NA	NA	NA	NA	NA	NA	NA	NA	NA	NA	51.225	50.127	32.854	33.409	0	105.232	101.908	84.853	119.899	24.692	174.119	0	0	0	0	67.449	0	207.019	0	0	0	0	87.31	49.795
SilkDB_TCONS_00375600	NA	NA	NA	NA	NA	NA	NA	NA	-5.30141	4.42011	0.000229194	0.00943444	8.14333	5.05803	5.61e-07	0.000191352	17.472	45.807	0	0	0	0	3.707	0	1.58	0	0	0	0	0.043	0.758	74.824	0	47.388	7.45	0.071	0	0	0	16.02
bmlnct_3400	NA	NA	NA	NA	1.98824	6.06482	1.93e-09	1.74e-07	NA	NA	NA	NA	NA	NA	NA	NA	139.401	101.362	77.203	34.004	38.079	22.571	30.344	50.401	14.171	35.703	37.185	74.445	145.526	107.033	190.594	20.136	32.536	30.316	35.365	32.819	33.078	165.864	182.54	246.522
bmlnct_4211	1.05283	5.31185	0.000713268	0.00922198	NA	NA	NA	NA	-1.36763	6.14441	3.72e-06	0.000229378	NA	NA	NA	NA	80.774	64.24	62.698	73.003	63.176	64.668	16.65	20.52	25.877	9.222	13.238	12.364	26.137	19.062	34.569	71.57	69.476	56.767	45.316	42.437	52.754	15.454	11.966	14.66
bmlnct_0416	5.71089	2.68732	0.000273512	0.00400938	NA	NA	NA	NA	NA	NA	NA	NA	NA	NA	NA	NA	0	0	0	0	2.466	2.384	0	0	0	3.221	0	2.458	0	2.145	0	2.845	2.672	0	9.45	3.541	5.997	0	3.139	3.555
bmlnct_2157	-2.09739	5.87999	9.81e-07	3.11e-05	NA	NA	NA	NA	NA	NA	NA	NA	NA	NA	NA	NA	579.388	509.513	675.607	230.447	238.845	197.33	618.023	236.698	287.072	447.142	198	259.849	711.295	840.42	327.022	89.146	159.202	134.613	112.69	48.57	123.238	290.178	314.985	133.039
SilkDB_TCONS_00245496	1.03411	9.76337	4.06e-08	1.89e-06	NA	NA	NA	NA	NA	NA	NA	NA	NA	NA	NA	NA	129.537	140.661	85.639	78.424	68.078	65.499	238.161	138.026	161.997	61.997	89.422	92.33	83.711	98.681	90.798	57.515	43.978	49.763	327.674	411.751	434.796	74.828	99.77	65.786
bmlnct_4247	NA	NA	NA	NA	1.41144	17.0722	1.41e-09	1.36e-07	NA	NA	NA	NA	NA	NA	NA	NA	25405.2	17856.4	21625.1	29816.9	22596.8	24531.5	72734.4	48161.1	50190.3	49051.6	61159.9	65662	40127.9	41303.7	38132.9	45953.1	53445.7	41101.9	58101.1	58976	119580	229841	124337	117849
bmlnct_3238	NA	NA	NA	NA	1.35928	8.49448	1.8e-18	5.87e-16	NA	NA	NA	NA	NA	NA	NA	NA	385.687	335.933	362.885	69.782	78.552	53.588	96.538	104.526	112.012	264.517	222.254	264.495	410.609	313.437	399.083	99.005	91.276	89.817	132.262	154.592	136.524	553.558	719.575	662.482
bmlnct_0878	1.06554	5.2501	0.0010324	0.0125801	NA	NA	NA	NA	1.98733	4.76468	0.000944331	0.029924	NA	NA	NA	NA	7.19	14.059	5.146	60.595	51.402	66.491	27.558	28.381	22.618	16.987	25.081	8.994	43.254	46.305	16.309	60.627	69.243	59.85	68.467	56.928	48.848	23.027	15.652	48.032
bmlnct_2727	NA	NA	NA	NA	NA	NA	NA	NA	-5.67385	3.28766	0.000417184	0.0154941	NA	NA	NA	NA	50.78	28.463	16.196	613.709	563.023	458.697	28.547	0	46.49	0	11.201	23.378	0	0	0	609.282	523.463	622.661	21.506	0	27.88	31.864	0	13.836
bmlnct_4034	NA	NA	NA	NA	-5.12047	3.21087	0.00172897	0.0362986	NA	NA	NA	NA	NA	NA	NA	NA	16.761	0	0	0	58.625	0	44.837	8.512	17.521	24.785	33.343	27.447	0	0	13.642	72.293	15.276	35.652	32.207	0	0	0	0	0
bmlnct_3105	-6.29052	3.02465	0.000878821	0.0110369	NA	NA	NA	NA	NA	NA	NA	NA	NA	NA	NA	NA	0	0	103.46	13.548	3.364	0	56.173	19.238	0	0	25.63	88.075	108.202	20.433	0	0	10.184	5.694	0	0	0	45.683	33.717	33.765
bmlnct_1109	2.21889	8.2378	4.51e-53	6.6e-50	NA	NA	NA	NA	NA	NA	NA	NA	NA	NA	NA	NA	1.102	0	1.616	4.876	3.405	5.43	38.231	40.524	39.802	364.785	333.157	312.014	1.419	0	1.542	2.902	1.839	1.291	200.374	190.769	196.858	437.603	459.974	479.045
SilkDB_TCONS_00112488	-1.1207	7.28443	1.82e-09	1.33e-07	NA	NA	NA	NA	NA	NA	NA	NA	NA	NA	NA	NA	0	0	2.507	0	0	0	423.351	300.514	327.21	0	2.81	0	0	0	0	0	0	0	169.246	175.273	168.572	0	0	0
bmlnct_4322	5.42638	5.92922	4.07e-21	1.49e-18	NA	NA	NA	NA	NA	NA	NA	NA	NA	NA	NA	NA	0	0	0	10.545	0	12.112	0	0	5.814	0	0	0	0	0	0	0	11.858	0	59.03	160.952	85.135	0	3.592	0
bmlnct_2800	NA	NA	NA	NA	-2.05201	4.72653	0.00176074	0.0365478	NA	NA	NA	NA	NA	NA	NA	NA	0	8.404	0	16.62	17.223	27.24	14.56	20.51	5.041	29.422	36.738	46.458	0	0	5.104	6.1	23.707	15.686	12.596	19.505	19.792	14.095	11.186	0
CK515816	-1.02221	5.8929	0.000169608	0.00269345	NA	NA	NA	NA	NA	NA	NA	NA	NA	NA	NA	NA	118.952	153.903	123.276	246.76	191.685	229.318	92.55	122.667	79.302	106.363	121.239	123.054	109.126	121.693	123.919	210.656	222.812	223.177	44.921	48.245	62.294	119.109	95.231	145.437
bmlnct_1552	1.84796	4.1763	0.000233749	0.00350095	NA	NA	NA	NA	NA	NA	NA	NA	NA	NA	NA	NA	158.535	147.985	119.112	598.922	661.203	748.425	20.031	35.362	55.25	12.46	18.923	25.938	207.249	199.533	156.196	797.86	583.181	577.818	163.587	125.513	135.61	25.778	105.648	69.485
bmlnct_4089	2.56686	3.33263	0.00520374	0.0453439	NA	NA	NA	NA	NA	NA	NA	NA	NA	NA	NA	NA	0	14.422	0	0	0	0	0	0	13.555	0	0	0	10.927	0	15.508	24.999	0	10.058	40.63	15.156	35.169	0	24.7	0
bmlnct_4404	1.05449	5.2652	0.00130903	0.0152593	NA	NA	NA	NA	NA	NA	NA	NA	NA	NA	NA	NA	25.355	25.313	23.692	1388.05	1357.15	1393.71	16.414	31.453	32.352	0	0	3.165	27.388	26.52	23.33	1921.18	2299.71	1903.6	51.423	64.86	60.537	6.968	12.113	0
bmlnct_3850	NA	NA	NA	NA	-5.61989	3.50715	0.000242972	0.00708475	NA	NA	NA	NA	NA	NA	NA	NA	0	0	0	0	11.3	0	0	0	0	16.902	31.752	19.114	0	24.23	0	0	0	24.076	12.451	0	14.317	0	0	0
CK513189	-1.11055	5.67067	3.87e-05	0.000749703	NA	NA	NA	NA	NA	NA	NA	NA	NA	NA	NA	NA	150.039	177.337	148.914	57.047	55.756	61.111	76.957	96.996	73.588	34.253	54.405	44.857	177.794	138.899	164.972	55.145	63.232	59.633	35.023	45.143	41.98	34.254	36.35	59.884
bmlnct_2069	-6.3268	3.05818	0.000475297	0.00655102	NA	NA	NA	NA	NA	NA	NA	NA	NA	NA	NA	NA	0	176.884	0	0	0	0	88.045	0	153.999	0	0	0	101.34	0	153.273	219.335	3.669	0	0	0	0	0	0	0.163
BP121075	NA	NA	NA	NA	NA	NA	NA	NA	1.94311	6.03642	8.78e-10	9.19e-08	NA	NA	NA	NA	68.501	33.6	36.095	33.261	37.955	44.191	2.719	2.72	8.066	9.35	0	0	181.028	164.185	178.495	55.84	58.895	70.644	2.461	5.241	0	10.717	8.437	4.561
bmlnct_3617	NA	NA	NA	NA	5.38734	3.22607	0.000838666	0.0201389	NA	NA	NA	NA	NA	NA	NA	NA	10.647	23.761	22.315	0	0	0	0	3.372	0	0	0	0	7.912	22.008	12.04	6.1	0	0	0	4.533	0	15.295	28.871	16.518
bmlnct_4055	5.7109	2.68732	0.000272043	0.00400122	NA	NA	NA	NA	NA	NA	NA	NA	NA	NA	NA	NA	0	0	16.287	0	0	0	0	0	0	0	0	0	0	0	0	0	0	0	22.401	9.674	13.519	0	0	0
bmlnct_4053	NA	NA	NA	NA	1.81684	6.13998	2.27e-10	2.53e-08	NA	NA	NA	NA	NA	NA	NA	NA	87.777	123.398	66.013	121.309	149.757	155.614	71.351	90.894	78.159	102.709	113.09	102.701	100.525	147.413	71.004	132.415	116.87	113.328	120.877	149.252	134.622	372.483	397.344	311.455
SilkDB_TCONS_00178133	6.30954	3.05496	0.000577331	0.007668	-6.50312	4.11559	2.09e-07	1.32e-05	NA	NA	NA	NA	NA	NA	NA	NA	0	0	0	0	0	0	0	0	0	4.916	7.517	4.581	0	0	0	0	0	0	3.962	0	6.418	0	0	0
bmlnct_3912	NA	NA	NA	NA	2.99881	4.43839	9.7e-05	0.00320913	NA	NA	NA	NA	NA	NA	NA	NA	93.545	61.064	2.54	0	43.775	0	0	0	0	0	30.31	16.731	55.281	41.895	13.795	10.582	41.606	0	0	15.114	0	60.776	120.321	206.011
bmlnct_4472	NA	NA	NA	NA	NA	NA	NA	NA	1.55523	5.87888	6.53e-07	5.01e-05	NA	NA	NA	NA	54.877	63.197	81.772	20.882	2.869	14.386	90.449	27.822	24.007	83.044	35.873	62.481	195.423	213.879	164.274	0	0	7.409	101.674	31.162	57.038	29.347	75.828	68.757
bmlnct_3775	-1.06619	6.62442	9.99e-08	4.17e-06	NA	NA	NA	NA	NA	NA	NA	NA	NA	NA	NA	NA	101.498	174.56	181.859	1907.33	1854.89	1973.93	198.391	189.989	245.982	61.022	68.081	48.609	195.062	270.775	171.525	2613.8	2467.16	3302.98	95.172	117.255	110.445	38.343	49.611	61.714
bmlnct_0499	NA	NA	NA	NA	2.81233	6.96369	2.47e-28	3.03e-25	NA	NA	NA	NA	NA	NA	NA	NA	29.994	20.339	27.494	39.514	35.458	36.226	129.624	103.771	106.971	54.029	67.765	38.544	25.423	44.015	55.973	41.642	29.738	28.742	197.82	197.228	133.78	416.679	405.328	304.375
bmlnct_2745	-1.01974	8.1248	8.53e-12	8.5e-10	-1.22353	7.34532	2.39e-09	2.09e-07	NA	NA	NA	NA	NA	NA	NA	NA	40.551	47.305	50.402	41.883	47.459	51.875	119.434	125.77	106.915	64.904	53.168	67.723	50.351	48.068	40.108	51.215	49.766	48.698	62.018	67.806	54.685	33.128	21.119	27.873
bmlnct_4281	5.71287	2.72317	0.00291193	0.0284889	NA	NA	NA	NA	NA	NA	NA	NA	NA	NA	NA	NA	0	0	154.712	0	40.195	0	0	0	0	0	0	13.267	0	0	0	0	0	13.546	40.933	23.471	0	0	62.557	0
bmlnct_4226	1.42826	5.55917	0.00101827	0.0124892	NA	NA	NA	NA	NA	NA	NA	NA	NA	NA	NA	NA	17.09	0	23.041	23.429	64.941	37.869	58.554	30.222	156.867	116.704	60.936	34.243	17.57	15.861	23.62	59.903	19.322	47.52	264.458	187.681	246.432	45.587	44.85	34.551
bmlnct_3764	7.66731	4.18029	3.42e-13	4.68e-11	7.72294	4.93095	3.2e-16	8.22e-14	NA	NA	NA	NA	NA	NA	NA	NA	0	0	0	83.727	0	36.386	0	0	0	0	0	0	0	0	0	55.079	41.693	0	77.825	43.4	45.436	88.169	79.894	92.576
BY923560	-1.02298	6.64187	1.36e-07	5.47e-06	NA	NA	NA	NA	NA	NA	NA	NA	NA	NA	NA	NA	19.765	14.494	23.585	14.628	19.762	13.715	122.513	146.932	142.617	60.005	74.295	47.864	26.448	35.961	18.277	25.103	16.708	16.318	78.18	70.086	66.447	42.305	63.62	50.657
bmlnct_3031	-1.00629	4.92245	0.00410941	0.0376811	NA	NA	NA	NA	NA	NA	NA	NA	NA	NA	NA	NA	74.722	79.425	97.135	162.349	151.057	164.17	46.983	44.433	43.129	69.922	56.945	59.465	80.007	66.942	62.39	157.68	195.252	178.918	19.506	26.672	26.951	22.305	47.136	46.346
bmlnct_3136	NA	NA	NA	NA	-7.16244	4.65335	4.88e-10	5.13e-08	NA	NA	NA	NA	NA	NA	NA	NA	12.815	26.593	0	0	0	0	876.833	639.41	986.245	75.195	174.472	156.049	0	0	0	0	0	0	1509.27	1554.38	1182.38	0	0	0
bmlnct_3139	-2.84724	5.04683	0.00376265	0.0353141	NA	NA	NA	NA	NA	NA	NA	NA	NA	NA	NA	NA	32.064	50.227	43.055	0	0	54.359	180.561	52.439	46.143	178.608	38.45	148.741	0	123.371	44.325	0	91.189	14.64	0	0	43.286	48.381	79.81	62.931
bmlnct_1957	1.61772	5.11226	0.000562265	0.00751343	NA	NA	NA	NA	NA	NA	NA	NA	NA	NA	NA	NA	3.777	1.852	3.612	1.675	6.976	5.24	21.323	17.904	17.834	2.551	18.262	17.019	1.898	22.45	17.144	4.111	13.407	3.403	38.024	40.865	111.505	12.087	4.698	0
bmlnct_2338	NA	NA	NA	NA	NA	NA	NA	NA	-1.12093	10.8255	5.35e-12	8.81e-10	NA	NA	NA	NA	1138.2	1336.17	1331.96	78.256	92.876	82.42	370.762	515.988	398.905	354.384	322.328	337.729	563.316	603.563	582.196	95.798	89.301	85.509	303.93	298.25	348.876	274.097	304.493	342.998
AK384485	-1.46413	4.38853	0.00160093	0.017667	NA	NA	NA	NA	NA	NA	NA	NA	NA	NA	NA	NA	17.623	8.604	10.918	14.906	13.828	17.161	11.493	19.445	15.28	10.646	11.369	6.201	17.738	8.803	8.027	12.485	14.327	16.704	6.976	4.108	6.651	12.884	11.039	7.09
bmlnct_0805	-1.34918	6.14551	2.2e-09	1.57e-07	NA	NA	NA	NA	NA	NA	NA	NA	NA	NA	NA	NA	54.993	86.087	99.79	100.863	101.523	97.458	100.583	122.533	121.176	66.871	92.53	102.785	93.773	83.561	96.115	81.819	122.708	95.728	48.764	45.327	49.821	73.373	88.974	85.754
bmlnct_4323	1.78206	8.47315	4.51e-13	5.99e-11	2.55717	8.60697	0.000817429	0.0197581	-1.28397	10.3531	0.00172202	0.047409	NA	NA	NA	NA	253.457	333.818	351.868	140.437	160.076	205.244	38.006	41.279	19.459	0	47.167	16.367	201.387	38.09	146.099	218.602	282.936	286.911	114.046	99.053	150.101	110.952	137.995	130.155
bmlnct_0261	NA	NA	NA	NA	1.15934	9.2222	9.15e-20	4.2e-17	NA	NA	NA	NA	NA	NA	NA	NA	166.116	146.134	159.156	83.786	65.839	66.942	38.254	59.524	49.436	39.678	38.673	37.902	160.619	147.932	168.023	94.97	88.759	89.195	83.379	82.735	80.576	78.28	92.165	94.56
bmlnct_4056	NA	NA	NA	NA	5.47062	6.31675	8.52e-33	3.13e-29	NA	NA	NA	NA	NA	NA	NA	NA	32.153	30.069	38.165	0	0	0	0	0	0	0	25.361	14.124	20.451	79.185	0	8.098	0	0	0	0	0	920.39	774.053	576.124
bmlnct_0725	NA	NA	NA	NA	1.21113	7.06031	5.16e-09	3.95e-07	NA	NA	NA	NA	NA	NA	NA	NA	298.648	290.271	309.308	46.294	46.273	48.278	70.587	97.379	72.278	115.882	80.724	89.825	303.466	346.963	319.771	59.094	57.162	56.372	99.068	106.362	93.804	219.843	191.999	251.035
bmlnct_1464	-1.06505	10.9049	4.9e-15	8.6e-13	NA	NA	NA	NA	NA	NA	NA	NA	NA	NA	NA	NA	765.837	962.872	1001.42	286.948	308.285	317.259	479.906	573.919	448.845	703.208	585.144	613.313	872.283	852.97	915.472	362.255	314.794	343.499	267.669	251.832	246.577	640.473	613.548	692.932
bmlnct_2939	NA	NA	NA	NA	1.52384	5.32684	0.000712303	0.0176824	NA	NA	NA	NA	NA	NA	NA	NA	5.226	0	23.502	288.455	178.744	473.023	41.534	86.87	111.654	29.541	16.188	46.458	18.822	34.25	16.786	321.841	365.219	477.923	166.706	137.666	133.882	64.78	109.05	93.918
SilkDB_TCONS_00253526	1.55863	6.27751	3.76e-12	4.12e-10	NA	NA	NA	NA	NA	NA	NA	NA	NA	NA	NA	NA	0	0	0	0	0.33	0.661	9.898	9.505	6.441	1.424	2.289	2.151	0	0	0.358	0	0	0	27.64	25.468	28.214	1.742	1.78	4.762
bmlnct_4202	NA	NA	NA	NA	NA	NA	NA	NA	-3.6296	3.79025	0.000500748	0.0182061	NA	NA	NA	NA	127.031	80.033	268.257	68.018	123.071	141.097	0	25.64	0	0	0	0	30.647	0	0	37.141	16.64	158.868	45.079	34.392	24.758	0	0	0
SilkDB_TCONS_00178135	NA	NA	NA	NA	-1.6014	7.978	1.26e-20	6.59e-18	NA	NA	NA	NA	NA	NA	NA	NA	43.991	51.607	57.255	6.551	0	0.01	39.321	44.092	45.56	85.994	81.822	94.564	43.128	39.912	44.59	7.07	7.986	7.089	46.29	48.783	39.642	35.114	28.187	25.65
bmlnct_3730	NA	NA	NA	NA	NA	NA	NA	NA	-7.05849	4.28693	4.9e-05	0.00238599	NA	NA	NA	NA	272.298	162.716	0	66.085	0	0	0	82.899	0	178.82	0	0	0	0	0	0	0	0	16.097	100.526	0	0	0	0
SilkDB_TCONS_00138761	NA	NA	NA	NA	NA	NA	NA	NA	1.36559	6.93737	2.44e-09	2.4e-07	NA	NA	NA	NA	53.509	91.677	87.371	88.92	139.953	113.337	71.665	112.81	105.19	111.745	129.268	98.065	205.452	211.418	179.577	99.471	101.692	154.428	185.83	230.345	193.881	152.588	146.675	169.659
bmlnct_3232	NA	NA	NA	NA	NA	NA	NA	NA	5.37954	3.09195	0.000820959	0.0270057	NA	NA	NA	NA	0	0	0	0.971	0	0	16.65	5.13	2.924	14.003	6.763	12.299	8.164	9.859	13.659	4.254	2.72	0	26.113	8.895	20.561	17.717	16.074	9.198
SilkDB_TCONS_00334143	NA	NA	NA	NA	1.24561	5.72532	0.000259563	0.00745026	NA	NA	NA	NA	NA	NA	NA	NA	12.273	18.434	16.683	34.054	28.595	24.064	22.289	19.248	11.449	11.57	14.662	10.13	15.429	17.3	21.345	39.986	41.054	28.959	24.586	34.165	31.074	24.621	35.56	26.445
bmlnct_3856	-6.1828	2.94984	0.000724864	0.00934435	NA	NA	NA	NA	NA	NA	NA	NA	NA	NA	NA	NA	0	0	0	0	0	0	45.702	43.895	0	0	0	0	0	0	0	0	0	0	0	0	0	0	0	0
bmlnct_3751	-1.60653	4.66848	0.000708437	0.00918663	NA	NA	NA	NA	NA	NA	NA	NA	NA	NA	NA	NA	204.445	274.225	220.469	3.954	6.243	14.446	48.14	72.101	44.305	36.568	38.106	0	165.356	204.378	213.609	19.965	9.574	15.224	10.858	32.437	15.102	35.061	38.035	33.593
bmlnct_3743	2.13762	3.92908	0.00474572	0.04245	NA	NA	NA	NA	NA	NA	NA	NA	NA	NA	NA	NA	0	0	0	42.567	37.377	31.067	0	13.115	14.854	12.41	36.385	0	0	25.805	25.222	0	40.415	16.044	72.534	17.012	42.226	0	0	16.26
bmlnct_3693	NA	NA	NA	NA	-7.2329	4.74319	0.00107904	0.0246234	NA	NA	NA	NA	-7.71223	4.72576	4.04e-06	0.000948745	0	0	0	0	188.228	183.805	0	0	0	0	352.22	0	0	0	0	0	0	0	0	0	0	0	0	0
bmlnct_0903	-1.43341	7.59834	8.09e-19	2.09e-16	NA	NA	NA	NA	NA	NA	NA	NA	NA	NA	NA	NA	100.379	122.981	105.752	106.611	104.01	95.534	154.329	170.7	146.471	99.302	96.521	100.02	100.156	107.297	121.201	124.726	94.809	121.585	60.241	57.48	68.901	88.657	88.226	90.871
bmlnct_4397	NA	NA	NA	NA	NA	NA	NA	NA	1.18426	5.37196	0.00162314	0.0452124	NA	NA	NA	NA	25.47	56.943	48.11	66.541	70.544	67.293	152.846	104.308	144.074	72.711	70.732	107.431	99.333	96.263	91.233	51.082	110.404	116.608	86.275	104.223	60.043	74.244	69.761	74.237
bmlnct_0581	-1.25601	5.55683	6.94e-06	0.00016529	NA	NA	NA	NA	NA	NA	NA	NA	NA	NA	NA	NA	9.705	13.233	15.099	10.842	3.405	11.481	52.286	47.65	47.095	19.657	23.528	21.162	12.724	10.625	9.279	9.316	15.508	16.468	25.81	16.048	23.625	15.73	8.3	23.599
AU000469	-1.01437	7.27944	5.91e-08	2.64e-06	NA	NA	NA	NA	NA	NA	NA	NA	NA	NA	NA	NA	122.641	89.118	112.086	97.979	90.564	77.812	237.712	236.584	212.352	30.753	45.158	26.32	100.198	79.917	102.497	95.369	97.742	99.395	147.411	112.424	98.567	22.464	23.995	32.788
SilkDB_TCONS_00515222	6.67639	3.39933	0.000119244	0.00198724	NA	NA	NA	NA	NA	NA	NA	NA	NA	NA	NA	NA	0	0	0	0	0	0	0	0	0	0	0	4.571	0	0	0	0	0	0	3.29	7.111	0	0	0	0
bmlnct_4416	-1.04389	8.3674	4.9e-09	3.07e-07	NA	NA	NA	NA	NA	NA	NA	NA	NA	NA	NA	NA	227.125	244.037	203.349	222.687	185.731	243.154	526.237	371.146	341.359	172.606	238.404	166.83	223.333	235.963	225.683	215.928	183.151	245.273	213.851	223.234	200.648	210.039	230.203	211.272
bmlnct_0813	-1.12705	8.73742	3.77e-19	1.03e-16	-1.08876	7.98576	7.82e-13	1.2e-10	NA	NA	NA	NA	NA	NA	NA	NA	153.15	233.909	174.816	74.579	84.476	84.664	705.057	712.587	659.876	350.833	377.087	351.536	222.904	220.187	248.562	83.36	71.973	79.033	316.907	356.438	339.539	173.342	174.282	164.734
bmlnct_4328	7.56077	4.05583	1.24e-09	9.54e-08	NA	NA	NA	NA	NA	NA	NA	NA	NA	NA	NA	NA	0	2.795	1.237	11.269	5.82	16.731	0	0	0	0	0	0	0	0	0	4.263	8.286	0	23.375	8.584	41.921	0	0	0
AK384825	NA	NA	NA	NA	NA	NA	NA	NA	-1.01703	8.57629	3.64e-08	3.22e-06	NA	NA	NA	NA	238.758	297.977	267.556	62.072	61.618	52.345	57.622	44.537	53.267	82.908	71.867	57.928	142.36	134.992	118.278	73.283	68.624	60.434	58.885	61.007	70.687	75.444	85.013	68.115
bmlnct_0007	1.1007	5.36728	0.00359019	0.0340649	NA	NA	NA	NA	NA	NA	NA	NA	NA	NA	NA	NA	0	10.9	0	57.354	51.051	100.283	197.424	70.921	233.099	68.125	23.649	86.055	21.467	10.276	21.566	47.304	44.036	97.246	415.989	401.878	325.904	31.503	117.687	86.367
bmlnct_3989	NA	NA	NA	NA	-1.4953	5.18693	0.00148624	0.0321203	NA	NA	NA	NA	NA	NA	NA	NA	199.3	121.783	123.721	167.315	147.084	136.188	168.394	140.219	147.882	148.465	182.771	200.664	164.045	210.192	236.752	182.384	109.581	163.657	169.773	213.673	179.956	100.776	42.364	43.433
bmlnct_2642	-6.51286	3.19353	0.000301885	0.00438133	NA	NA	NA	NA	NA	NA	NA	NA	NA	NA	NA	NA	0	15.974	1.138	0	0	0	0	128.252	65.579	3.509	0	77.433	41.255	56.505	0	0	0	0	0	0	0	0	0	0
bmlnct_3046	8.06539	4.55282	0.000304162	0.0043998	NA	NA	NA	NA	NA	NA	NA	NA	NA	NA	NA	NA	0	0	0	0	0	0	0	0	0	0	0	0	0	0	0	0	0	0	0	338.506	0	0	0	0
bmlnct_0043	-1.34761	4.092	0.00546222	0.0469429	NA	NA	NA	NA	-1.2158	6.37427	0.000157152	0.00670127	NA	NA	NA	NA	249.147	381.477	354.581	41.784	42.413	83.222	88.405	65.171	72.569	89.503	63.708	111.555	87.532	112.516	204.892	53.223	62.37	17.628	27.679	37.168	27.706	30.908	67.233	35.202
SilkDB_TCONS_00421966	-1.84564	6.11527	1.44e-11	1.35e-09	NA	NA	NA	NA	NA	NA	NA	NA	NA	NA	NA	NA	222.966	391.133	344.372	354.065	279.638	347.925	249.53	436.048	374.182	251.87	276.305	241.722	197.775	171.234	177.123	337.257	288.444	268.924	100.713	98.784	105.479	178.196	284.185	181.693
SilkDB_TCONS_00399274	-1.13604	5.16356	0.000613946	0.00810519	NA	NA	NA	NA	NA	NA	NA	NA	NA	NA	NA	NA	1.298	1.906	1.855	0.575	0.599	1.202	17.515	20.458	19.459	22.632	20.244	11.759	0.655	2.597	1.312	1.418	0.658	1.169	10.292	6.572	11.036	19.044	28.513	27.001
bmlnct_2347	NA	NA	NA	NA	NA	NA	NA	NA	-4.14562	4.57634	1.8e-06	0.000119753	NA	NA	NA	NA	6.016	25.831	21.564	244.609	286.697	211.336	37.692	66.102	32.196	4.959	32.998	6.07	0	2.963	0	258.065	223.383	208.876	28.442	27.479	46.684	13.277	19.297	11.891
bmlnct_2643	1.63931	7.46387	1.93e-16	3.68e-14	NA	NA	NA	NA	2.60671	9.03152	5.85e-42	2.02e-38	NA	NA	NA	NA	176.594	201.861	238.042	23.677	12.352	22.231	154.07	110.111	166.075	152.678	212.504	152.176	1214.67	1340.33	1164.4	29.1	29.806	21.634	526.349	493.806	401.703	219.991	158.946	189.062
AK387189	6.78902	3.4248	5.63e-07	1.91e-05	NA	NA	NA	NA	NA	NA	NA	NA	NA	NA	NA	NA	0	0	0	0	0	0	0	0	0	15.088	0	12.243	0	0	0	0	0	0	8.674	26.729	34.327	0	14.346	0
DC531637	-1.22338	5.59266	4.76e-06	0.000117298	NA	NA	NA	NA	NA	NA	NA	NA	NA	NA	NA	NA	126.258	126.52	119.029	215.997	233.077	209.242	69.384	62.751	60.134	92.495	73.672	89.071	67.3	91.342	80.249	205.375	216.684	217.69	32.523	25.34	29.274	120.277	134.098	133.441
SilkDB_TCONS_00147877	7.25236	3.7732	2.74e-05	0.000553146	NA	NA	NA	NA	NA	NA	NA	NA	NA	NA	NA	NA	0	0	0	2.716	2.621	0	0	0	0	0	0	0	0	0	1.645	1.618	1.404	1.857	0	2.054	2.977	0	0	0
bmlnct_3111	NA	NA	NA	NA	7.50982	4.75596	3.27e-13	6e-11	NA	NA	NA	NA	NA	NA	NA	NA	0	51.779	0	0	0	0	0	52.708	64.055	0	0	0	0	99.779	119.428	25.322	0	0	78.233	26.261	72.226	73.033	101.93	125.584
bmlnct_4360	NA	NA	NA	NA	NA	NA	NA	NA	1.14575	9.66765	2.79e-09	2.68e-07	NA	NA	NA	NA	790.872	1198.06	1166.28	5982.06	6180.56	6401.86	1756.36	1331.36	1439.49	1470.28	1508.51	1349.28	2337.55	2183.42	2329.19	6185.11	6353.8	6288.98	1176.02	1195.43	1206.36	2288.14	2053.45	2338.37
bmlnct_4048	NA	NA	NA	NA	NA	NA	NA	NA	-2.35997	4.80583	5.11e-06	0.000298935	NA	NA	NA	NA	29.478	19.94	22.702	2.022	0	0	0.921	0	3.574	0	1.219	0	4.561	6.777	2.292	0	0	0	1.632	2.635	4.269	1.838	0	0
SilkDB_TCONS_00057239	NA	NA	NA	NA	NA	NA	NA	NA	2.55677	5.95045	3.67e-15	1.15e-12	NA	NA	NA	NA	14.424	10.247	10.003	26.809	14.52	19.425	31.917	27.926	22.718	12.359	5.638	2.635	71.146	74.366	59.603	22.848	26.611	16.544	27.363	24.391	25.891	4.227	18.012	8.777
bmlnct_0694	NA	NA	NA	NA	NA	NA	NA	NA	2.02314	5.14668	3.21e-06	0.000201884	NA	NA	NA	NA	26.457	29.951	45.463	0	5.872	0	24.514	9.733	34.492	16.97	0	12.532	112.855	161.443	134.101	7.727	0	0	32.588	29.632	0	10.143	16.569	8.556
bmlnct_4252	NA	NA	NA	NA	1.77344	7.37708	2.08e-14	4.25e-12	NA	NA	NA	NA	NA	NA	NA	NA	322.34	307.243	339.696	58.92	21.661	73.204	126.636	102.178	102.636	75.263	164.546	145.91	463.547	340.459	279.927	57.772	119.407	51.357	144.897	118.954	107.962	513.228	450.842	377.175
BP120347	-1.35552	8.65241	2.05e-25	1.12e-22	-1.13108	8.218	4.83e-13	8.06e-11	2.00508	8.56672	5.3e-28	6.1e-25	NA	NA	NA	NA	120.668	123.97	115.17	23.072	21.145	29.694	557.705	591.967	530.41	335.711	351.14	361.415	467.839	511.404	459.538	36.589	32.545	33.031	223.078	231.789	245.27	184.25	165.719	136.91
bmlnct_0387	1.38583	4.47147	0.00209453	0.0222824	NA	NA	NA	NA	NA	NA	NA	NA	NA	NA	NA	NA	47.039	15.293	20.022	37.116	37.501	32.329	15.728	20.676	28.129	26.074	78.538	37.669	12.985	13.256	28.434	26.236	22.023	37.876	60.307	50.553	70.353	42.56	30.283	29.109
bmlnct_4351	NA	NA	NA	NA	-1.01845	5.92999	0.00135008	0.0300617	NA	NA	NA	NA	NA	NA	NA	NA	28.465	23.543	22.867	106.482	76.767	60.751	28.996	46.647	55.631	74.915	62.918	77.275	16.101	11.834	20.05	85.045	67.22	93.202	48.185	47.012	53.698	40.988	25.585	43.059
bmlnct_3178	1.27827	5.17331	0.00103327	0.0125801	NA	NA	NA	NA	NA	NA	NA	NA	NA	NA	NA	NA	90.532	45.798	89.441	28.404	43.136	29.644	48.915	18.504	41.281	23.844	31.333	23.285	96.275	109	73.305	31.755	53.213	44.579	75.443	80.724	127.797	55.21	46.904	50.581
bmlnct_2843	NA	NA	NA	NA	-2.57548	4.64915	0.00232691	0.0446869	NA	NA	NA	NA	NA	NA	NA	NA	11.535	16.065	9.805	54.985	40.298	34.603	16.942	51.508	98.054	40.857	64.211	27.149	8.474	33.79	10.114	48.161	77.288	48.349	66.98	22.777	0	0	0	19.891
bmlnct_0839	NA	NA	NA	NA	-2.00816	4.93419	0.00245186	0.0461956	NA	NA	NA	NA	NA	NA	NA	NA	51.936	26.157	32.285	62.577	56.943	108.468	76.709	26.84	19.156	120.239	72.593	111.676	20.14	42.296	38.966	66.859	85.448	130.88	0	16.7	32.091	59.108	9.396	3.191
bmlnct_2907	NA	NA	NA	NA	NA	NA	NA	NA	1.13651	11.1355	1.55e-13	3.58e-11	NA	NA	NA	NA	815.462	864.478	786.184	10.932	5.16	9.317	11.954	7.054	14.081	378.534	392.512	314.128	1789.69	1824.02	1795.98	4.872	10.213	15.111	11.253	8.669	12.633	328.999	329.668	318.689
bmlnct_3161	NA	NA	NA	NA	NA	NA	NA	NA	NA	NA	NA	NA	5.85969	3.25516	0.000170821	0.0194374	0	9.121	0	0	0	0	0	0	0	0	69.783	0	45.992	41.231	0	25.608	13.959	37.688	0	0	0	91.344	0	0
bmlnct_3553	NA	NA	NA	NA	-5.34005	3.32062	0.000771284	0.0187662	NA	NA	NA	NA	NA	NA	NA	NA	8.123	0	11.867	0	0	5.931	6.303	4.116	0	21.081	15.75	12.578	0	5.883	0	0	0	0	5.409	0	5.445	0	0	0
bmlnct_3697	-2.09606	3.28178	0.00359069	0.0340649	NA	NA	NA	NA	NA	NA	NA	NA	NA	NA	NA	NA	0	0	15.314	0	0	0	43.275	27.171	25.642	0	0	0	0	0	15.806	8.764	0	7.711	13.399	10.666	0	0	0	0
bmlnct_0332	-1.2595	8.26294	7.02e-17	1.4e-14	NA	NA	NA	NA	NA	NA	NA	NA	NA	NA	NA	NA	282.802	354.366	350.416	947.991	992.16	976.792	110.941	132.338	120.448	196.086	159.848	171.513	237.988	219.813	233.488	1054.7	942.736	992.573	51.515	49.845	61.307	108.912	106.965	119.606
bmlnct_3928	NA	NA	NA	NA	NA	NA	NA	NA	-1.9618	6.71078	2.1e-16	7.27e-14	NA	NA	NA	NA	108.368	105.9	89.581	0	1.115	1.112	3.91	5.699	4.739	3.238	9.052	8.463	25.423	26.384	25.563	0	0	0	5.199	3.739	6.796	1.944	1.506	3.229
bmlnct_4333	NA	NA	NA	NA	1.03276	13.5876	1.92e-18	5.87e-16	-1.36769	14.8235	9.54e-20	4.71e-17	NA	NA	NA	NA	4953.6	4650.47	4992.34	1024.64	1017.17	973.015	235.105	265.213	271.389	1138.6	999.277	948.417	1815.18	1938.82	1921.99	1249.15	1094.1	1108.45	493.616	448.423	424.457	1973.99	2110.14	2386.9
DC432890	3.98246	3.87428	0.0012779	0.0150161	NA	NA	NA	NA	NA	NA	NA	NA	NA	NA	NA	NA	0	0	0	0	0	0	4.82	0	0	59.022	100.847	70.348	0	0	0	0	0	0	28.245	54.477	0	72.523	50.949	75.895
bmlnct_3904	NA	NA	NA	NA	-1.78413	6.04538	3.69e-09	3.01e-07	NA	NA	NA	NA	NA	NA	NA	NA	35.486	47.949	46.832	222.498	237.617	244.726	97.572	137.468	180.717	225.542	247.242	237.365	22.038	43.053	35.43	250.357	197.081	273.779	98.463	74.322	98.262	47.871	81.422	70.606
bmlnct_2972	NA	NA	NA	NA	NA	NA	NA	NA	5.55947	3.19583	0.00055035	0.019397	NA	NA	NA	NA	0	0	0	216.909	267.998	242.663	100.92	80.582	141.934	101.413	81.022	112.477	16.579	6.683	18.32	274.699	240.846	294.565	72.679	105.951	89.245	242.286	141.366	149.557
bmlnct_0936	3.3714	5.52215	6.48e-22	2.84e-19	NA	NA	NA	NA	NA	NA	NA	NA	NA	NA	NA	NA	25.923	15.847	26.29	7.195	5.985	6.001	5.235	8.957	8.928	10.926	8.699	3.249	27.649	14.473	21.251	1.76	1.646	7.296	76.904	82.735	101.863	33.829	32.305	17.333
bmlnct_3825	NA	NA	NA	NA	NA	NA	NA	NA	NA	NA	NA	NA	-4.95425	4.0599	1.55e-07	6.45e-05	0	0	19.783	55.352	37.119	41.205	0.079	0	12.065	0	0	70.581	0	0	12.389	4.777	0	0	0	0	0	0	0	0
bmlnct_0424	5.21439	2.39051	0.00166656	0.0182613	NA	NA	NA	NA	NA	NA	NA	NA	NA	NA	NA	NA	0	0	0	0	0	0	0	0	0	0	0	0	0	0	0	0	0	1.932	6.186	11.615	6.041	3.431	0	0
bmlnct_3504	NA	NA	NA	NA	NA	NA	NA	NA	-1.02183	6.15047	0.00145879	0.0416419	NA	NA	NA	NA	147.311	91.26	146.243	80.198	148.88	150.054	84.944	58.065	63.473	352.053	301.722	284.819	44.043	61.988	82.686	101.831	108.807	119.144	97.37	116.985	84.961	267.565	259.475	252.05
bmlnct_0131	NA	NA	NA	NA	-4.11761	5.2552	0.00146202	0.0318394	NA	NA	NA	NA	NA	NA	NA	NA	174.523	92.149	72.156	0	311.619	0	0	0	0	387.968	0	148.824	0	138.431	62.577	0	29.728	0	0	0	0	25.619	0	0
bmlnct_2840	3.77144	4.43586	1.39e-07	5.55e-06	NA	NA	NA	NA	NA	NA	NA	NA	NA	NA	NA	NA	11.446	10.465	0	8.464	0	0	0	0	18.428	0	0	0	0	4.946	0	27.92	0	0	83.471	49.42	133.823	0	0	0
bmlnct_4426	5.95987	2.88589	0.00115681	0.0138155	NA	NA	NA	NA	NA	NA	NA	NA	NA	NA	NA	NA	0	0	0	0	0	0	0	0	0	22.785	0	0	0	0	0	0	0	0	37.761	22.692	0	0	49.759	5.691
bmlnct_3374	NA	NA	NA	NA	1.5866	8.16729	1.7e-19	6.93e-17	NA	NA	NA	NA	NA	NA	NA	NA	401.052	371.892	421.715	86.859	64.156	54.409	154.621	130.517	125.108	281.165	256.257	246.74	393.685	399.91	412.273	61.036	54.926	82.559	141.225	153.828	183.964	763.756	922.455	668.001
bmlnct_3528	NA	NA	NA	NA	1.12585	5.86809	0.000265194	0.00755289	NA	NA	NA	NA	NA	NA	NA	NA	158.509	109.004	127.721	120.545	102.7	97.538	124.411	127.683	98.301	56.708	53.717	55.47	127.863	128.521	131.306	105.847	126.715	129.89	163.692	141.051	142.536	100.978	116.929	144.546
bmlnct_3788	1.17051	4.92502	0.00152863	0.017005	NA	NA	NA	NA	NA	NA	NA	NA	NA	NA	NA	NA	30.838	15.121	14.761	531.478	534.83	494.963	39.298	20.727	41.158	8.4	0	15.362	27.716	27.227	15.474	603.515	667.331	683.124	79.655	80.441	80.329	14.541	15.231	4.11
SilkDB_TCONS_00182945	NA	NA	NA	NA	8.11108	5.12555	0.000397805	0.0106681	NA	NA	NA	NA	NA	NA	NA	NA	10.353	32.81	21.655	16.571	10.701	0	17.672	0	0	0	0	0	2.746	23.685	0	11.667	11.713	20.277	0	0	11.166	30.717	0	0
bmlnct_2769	NA	NA	NA	NA	NA	NA	NA	NA	-1.28124	8.48756	9.25e-13	1.78e-10	NA	NA	NA	NA	46.31	46.615	50.526	2.834	1.878	3.086	4.381	5.72	7.114	13.291	14.122	13.127	20.77	20.799	17.74	1.637	3.224	2.206	6.002	7.748	5.097	14.891	14.894	13.529
bmlnct_2290	1.61414	4.0154	0.00206006	0.0220514	NA	NA	NA	NA	NA	NA	NA	NA	NA	NA	NA	NA	6.896	14.277	3.307	16.056	6.367	3.136	6.898	20.882	12.491	23.548	7.396	6.862	0	11.698	3.459	7.499	0	8.164	38.722	45.298	60.944	16.081	8.511	5.653
bmlnct_3909	-2.58759	4.1859	1.39e-05	0.000304117	NA	NA	NA	NA	NA	NA	NA	NA	NA	NA	NA	NA	78.366	185.388	129.948	0	0	0	40.399	53.483	43.208	28.294	40.46	9.273	104.893	159.017	180.6	0	0	0	0	8.867	16.002	0	79.325	22.488
bmlnct_0205	-6.17166	2.94802	0.000190277	0.00295739	NA	NA	NA	NA	NA	NA	NA	NA	NA	NA	NA	NA	0	0	53	0	81.937	15.639	5.516	56.814	52.113	118.721	0	0	35.829	127.057	10.089	2.065	14.24	0	0	0	1.757	36.166	5.298	64.407
SilkDB_TCONS_00375590	NA	NA	NA	NA	NA	NA	NA	NA	NA	NA	NA	NA	1.59717	7.20872	0.000240582	0.025811	20.138	7.506	0	11.179	60.029	75.959	0	4.013	0	10.358	0	7.783	0	0	0	186.638	155.282	114.911	0	0	6.796	0	14.104	0
AV405562	NA	NA	NA	NA	NA	NA	NA	NA	1.064	5.82327	0.000439638	0.0161544	NA	NA	NA	NA	39.529	28.581	24.616	19.832	15.861	12.723	9.718	12.215	13.521	55.682	57.215	48.199	67.258	64.772	60.677	11.229	19.177	23.218	8.647	6.643	11.283	55.125	55.647	45.953
DC550507	-1.16925	7.35867	4.48e-12	4.79e-10	NA	NA	NA	NA	NA	NA	NA	NA	NA	NA	NA	NA	67.523	104.702	81.764	181.348	209.786	192.08	221.051	254.86	229.481	1857.96	1599.21	1609.16	77.697	98.077	84.757	227.737	217.216	183.971	118.455	99.393	115.905	901.654	1011.73	1129.89
bmlnct_0946	1.99733	3.46933	0.00234613	0.0241955	NA	NA	NA	NA	NA	NA	NA	NA	NA	NA	NA	NA	0	1.679	3.282	0	0.795	0	2.809	0.683	2.039	0	0.93	1.732	0	2.58	1.747	0	0.871	1.555	7.45	9.377	7.304	0	2.159	1.15
SilkDB_TCONS_00103250	3.15223	3.50045	0.000761075	0.00975377	6.09125	3.62329	0.00107565	0.0246234	1.4078	10.1655	2.85e-12	4.92e-10	NA	NA	NA	NA	313.444	490.498	501.59	0	5.5	0	4.393	0	0	0	0	0	1107.6	1178.26	1176.49	0	0	16.157	16.755	5.482	21.171	23.133	18.675	0
bmlnct_3326	-1.21763	6.3184	1.34e-06	3.98e-05	NA	NA	NA	NA	NA	NA	NA	NA	NA	NA	NA	NA	92.043	220.939	223.182	496.364	565.592	461.582	158.564	180.722	135.414	69.643	92.353	56.374	219.629	186.465	216.251	608.482	633.683	651.233	95.764	52.027	68.64	93.575	25.669	87.603
bmlnct_3918	1.20585	5.15723	0.000507594	0.00686662	NA	NA	NA	NA	NA	NA	NA	NA	NA	NA	NA	NA	0	0	0	787	751.189	831.487	32.243	60.61	38.424	30.388	16.95	11.694	23.634	0	0	1136.42	510.21	825.014	85.867	121.249	115.411	3.919	0	0
bmlnct_0593	2.72575	3.81673	9.55e-06	0.000220311	NA	NA	NA	NA	NA	NA	NA	NA	NA	NA	NA	NA	9.287	3.24	6.317	0	0	0.611	2.168	0.527	1.042	8.892	3.563	4.674	6.014	4.648	2.684	1.446	0.678	0	7.647	10.326	9.395	8.646	8.321	5.337
bmlnct_3207	3.07299	3.46259	0.000629026	0.00827935	NA	NA	NA	NA	-2.32081	5.05876	1.5e-05	0.000823241	NA	NA	NA	NA	87.288	119.94	87.396	109.356	159.674	76.99	0	0	12.535	0	0	0	23.449	0	34.458	87.671	79.562	43.023	31.759	60.865	21.186	0	0	34.455
bmlnct_3871	NA	NA	NA	NA	NA	NA	NA	NA	8.74322	9.74302	1.51e-23	1.3e-20	NA	NA	NA	NA	46.257	0	0	0	0	0	0	0	28.499	29.1	0	0	3082.05	13596	1951.01	0	0	0	86.064	20.44	24.322	72.449	43.26	0
bmlnct_1874	NA	NA	NA	NA	NA	NA	NA	NA	1.57978	9.21	5.9e-20	3.4e-17	NA	NA	NA	NA	55.286	63.051	60.216	42.002	36.48	45.112	37.703	39.986	38.827	49.952	57.54	52.091	175.224	169.31	190.697	39.71	42.342	32.041	33.523	31.814	30.494	60.287	65.885	71.765
bmlnct_1183	-1.09406	5.43259	0.000127964	0.00211648	NA	NA	NA	NA	NA	NA	NA	NA	NA	NA	NA	NA	47.661	87.384	51.293	70.397	75.095	75.778	36.703	43.513	34.907	48.401	44.507	32.018	56.18	41.853	61.043	91.487	66.126	101.261	18.479	17.649	21.476	23.41	43.555	30.057
bmlnct_3667	NA	NA	NA	NA	5.84823	3.48572	7.71e-05	0.0026972	NA	NA	NA	NA	NA	NA	NA	NA	0	0	0	0	0.671	0	0	0	0	0	0	0	0	16.917	0	0	0	0	0	7.337	12.43	42.422	39.394	18.387
bmlnct_3378	NA	NA	NA	NA	NA	NA	NA	NA	NA	NA	NA	NA	5.6848	6.04543	1.28e-17	1.61e-14	207.414	70.666	254.048	0	0	22.17	35.052	0	0	51.13	0	43.488	185.395	323.985	83.496	590.021	468.43	171.094	0	0	0	186.682	0	0
bmlnct_4234	-1.85028	13.4851	5.4e-57	1.18e-53	NA	NA	NA	NA	NA	NA	NA	NA	NA	NA	NA	NA	1148.42	1474.31	1428.12	2535.97	2671.96	2715.35	4851.03	5461.08	4873.29	4111.92	3839.18	3644.04	1394.11	1241.49	1309.81	2780.3	2649.69	2959.79	1544.54	1509.27	1437.6	2883.75	3067.5	3293.93
CK522748	NA	NA	NA	NA	NA	NA	NA	NA	-1.25121	8.99285	1.42e-10	1.81e-08	NA	NA	NA	NA	707.085	861.537	794.669	50.525	64.301	58.547	57.734	55.055	46.479	28.566	36.264	48.553	382.817	258.771	342.291	66.612	62.051	51.272	33.378	52.112	41.471	13.457	28.84	22.555
SilkDB_TCONS_00364380	6.62852	3.3901	0.0035071	0.0334894	NA	NA	NA	NA	NA	NA	NA	NA	NA	NA	NA	NA	4.266	0	13.582	0	0	4.809	0	0	0	10.019	12.001	10.139	0	3.78	0	0	0	0	9.977	0	0	0	0	13.136
bmlnct_1015	-2.3661	3.63378	0.000479924	0.00659406	NA	NA	NA	NA	1.14141	9.11772	1.69e-06	0.000114758	NA	NA	NA	NA	429.624	813.416	834.862	341.577	425.082	367.33	30.311	36.531	57.154	0	0	0	1695.87	1451.36	1358.8	441.676	411.016	512.039	8.252	2.932	14.216	0	14.136	5.097
BY941232	-2.12065	4.02598	0.00020041	0.00308209	NA	NA	NA	NA	NA	NA	NA	NA	NA	NA	NA	NA	0	10.746	16.782	11.675	12.156	18.263	22.941	43.378	29.339	11.892	16.495	10.977	13.195	10.846	11.052	4.777	2.226	9.87	7.884	5.071	10.266	13.978	0	14.65
bmlnct_1744	NA	NA	NA	NA	1.28579	6.47532	1.99e-05	0.00080327	NA	NA	NA	NA	NA	NA	NA	NA	53.535	34.398	46.469	30.079	11.764	10.85	45.343	42.54	41.359	47.324	22.011	40.285	57.515	56.309	70.817	11.067	17.725	30.109	34.049	41.431	51.113	89.146	71.268	110.235
bmlnct_3613	-1.94133	5.14498	5.21e-08	2.36e-06	NA	NA	NA	NA	NA	NA	NA	NA	NA	NA	NA	NA	20.769	33.954	16.584	12.22	15.975	35.084	115.311	104.277	127.629	4.73	14.848	13.77	37.963	40.618	38.148	37.607	28.005	18.618	39.709	37.097	16.06	0	8.521	4.599
bmlnct_3572	-1.29472	6.23196	1.67e-07	6.47e-06	NA	NA	NA	NA	NA	NA	NA	NA	NA	NA	NA	NA	82.827	114.086	112.622	22.944	33.982	13.875	280.672	269.578	184.01	181.269	204.233	203.308	130.299	114.908	158.795	5.034	20.813	32.626	113.441	92.112	114.685	62.358	130.39	112.994
bmlnct_0333	NA	NA	NA	NA	NA	NA	NA	NA	-3.19429	3.50209	0.00136824	0.0400502	NA	NA	NA	NA	2.417	3.304	4.602	0.426	1.342	0.902	0	0.383	0.762	0.644	0	0.484	0.487	0.485	0	0.523	0.987	1.31	0	0	1.83	0	0	0
bmlnct_3251	NA	NA	NA	NA	NA	NA	NA	NA	1.05956	6.61212	0.000362594	0.0137626	NA	NA	NA	NA	250	180.605	110.239	272.488	398.034	309.805	0	195.905	281.784	271.154	477.246	318.774	431.858	385.394	277.72	206.383	397.474	582.305	154.413	324.752	127.928	0	264.973	56.952
bmlnct_3382	NA	NA	NA	NA	5.1813	3.11046	0.00143596	0.031591	NA	NA	NA	NA	NA	NA	NA	NA	2.666	0	0	270.932	283.849	272.748	11.336	11.688	3.898	0	0	0	6.047	6.453	0	240.612	236.848	295.074	2.685	13.91	8.32	10.059	13.756	11.364
bmlnct_0742	NA	NA	NA	NA	-2.47254	7.28064	1.63e-15	3.73e-13	NA	NA	NA	NA	NA	NA	NA	NA	0	76.974	30.075	35.62	100.76	153.771	168.821	155.516	100.272	698.673	962.417	707.784	0	203.313	207.227	128.875	0	47.218	260.457	212.554	178.94	254.915	103.425	70.644
AK386966	-1.68119	9.84499	2.19e-42	2.4e-39	-1.03502	10.2338	4.4e-23	3.23e-20	NA	NA	NA	NA	NA	NA	NA	NA	358.048	481.894	475.276	591.588	621.823	613.86	516.013	560.711	497.273	558.43	531.279	533.487	359.628	399.05	354.468	719.077	637.1	707.737	174.682	164.975	184.051	264.272	253.386	290.558
bmlnct_3057	NA	NA	NA	NA	NA	NA	NA	NA	-1.36234	7.22196	1.53e-10	1.88e-08	NA	NA	NA	NA	182.059	224.07	208.668	161.814	158.57	173.286	134.702	143.312	164.361	114.695	79.068	71.754	64.024	97.745	76.219	178.425	215.735	206.793	88.118	105.725	106.524	83.973	89.817	66.534
bmlnct_4264	-1.06327	7.1107	2.73e-09	1.84e-07	NA	NA	NA	NA	NA	NA	NA	NA	NA	NA	NA	NA	277.648	297.214	300.245	390.636	365.817	443.479	255.631	248.179	282.849	146.49	141.195	106.584	274.842	229.808	263.201	419.076	470.163	485.503	151.017	132.283	112.289	127.925	145.01	165.462
SilkDB_TCONS_00185834	NA	NA	NA	NA	7.05138	4.35453	7.51e-10	7.67e-08	NA	NA	NA	NA	NA	NA	NA	NA	0	0	6.869	0	0	0	0	0	0	0	0	0	0	0	11.094	0	0	0	0	0	0	24.812	17.022	17.4
bmlnct_0637	1.58511	4.21138	0.00138069	0.0158005	NA	NA	NA	NA	NA	NA	NA	NA	NA	NA	NA	NA	0.515	0	0.231	5.411	5.872	5.861	1.786	0.827	1.199	0.644	0.837	0.382	0.538	1.09	1.227	6.081	5.421	7.013	4.027	3.796	4.124	0.404	0.527	0.211
bmlnct_2119	5.35872	2.49186	0.00439243	0.0396132	NA	NA	NA	NA	NA	NA	NA	NA	NA	NA	NA	NA	0	6.553	0	42.607	96.9	46.124	0	0	0	0	4.345	0	0	3.933	0	30.023	32.652	52.912	35.76	4.646	6.389	0	7.479	0
SilkDB_TCONS_00551813	NA	NA	NA	NA	-2.04928	4.43943	0.00101977	0.0235638	NA	NA	NA	NA	NA	NA	NA	NA	33.637	40.007	25.275	10.644	17.75	6.662	17.346	20.903	22.662	45.62	36.115	31.208	14.429	28.444	26.594	13.075	7.309	4.317	3.448	9.249	8.974	7.626	8.932	9.62
bmlnct_0208	NA	NA	NA	NA	NA	NA	NA	NA	NA	NA	NA	NA	7.47484	4.42833	1.28e-05	0.00239984	0	0	0	0	0	0	0	0	0	0	58.499	0	0	0	0	111.49	150.742	0	0	0	0	0	0	0
SilkDB_TCONS_00150541	-1.09781	6.98852	4.56e-08	2.09e-06	NA	NA	NA	NA	NA	NA	NA	NA	NA	NA	NA	NA	88.168	68.461	90.398	12.795	19.143	13.715	152.318	140.136	112.785	97.624	61.504	72.108	66.283	93.241	68.201	17.195	18.054	15.799	65.532	80.044	55.498	48.221	44.218	80.829
bmlnct_4011	2.44444	3.04377	0.00385702	0.0359152	NA	NA	NA	NA	NA	NA	NA	NA	NA	NA	NA	NA	0	0	0	27.691	16.614	16.53	7.055	0	7.046	0	0	0	0	0	0	0	4.54	12.066	35.405	30.808	20.736	6.925	5.498	0
AK384617	-1.01805	8.45746	3.12e-08	1.5e-06	NA	NA	NA	NA	NA	NA	NA	NA	NA	NA	NA	NA	155.22	156.009	166.488	119.128	126.445	126.681	88.933	120.361	79.1	60.539	59.168	42.483	137.572	126.98	149.456	143.52	121.778	130.833	56.029	48.769	46.989	42.677	43.681	51.395
bmlnct_4142	NA	NA	NA	NA	1.21858	6.0233	2.64e-05	0.00101992	NA	NA	NA	NA	NA	NA	NA	NA	4.328	0	8.065	8.563	23.167	18.063	2.46	0	7.853	97.395	84.166	99.015	0	10.421	0	5.491	5.208	8.192	25.757	25.794	15.29	250.146	200.552	192.856
bmlnct_0912	NA	NA	NA	NA	4.26124	3.69771	0.000422737	0.0110152	NA	NA	NA	NA	NA	NA	NA	NA	135.145	0	0	0	12.961	10.048	18.458	0	0	6.4	0	0	0	0	9.305	0	0	13.471	0	0	0	19.161	80.547	103.652
bmlnct_4139	-1.58281	3.82877	0.00478566	0.04272	NA	NA	NA	NA	NA	NA	NA	NA	NA	NA	NA	NA	126.889	93.974	99.493	20.763	14.685	21.75	102.841	101.65	62.117	0	17.025	7.793	46.765	67.709	86.146	17.129	15.924	7.042	28.324	41.729	21.607	11.715	0	20.878
bmlnct_2929	1.85072	4.09812	0.000242548	0.00360369	NA	NA	NA	NA	NA	NA	NA	NA	NA	NA	NA	NA	12.531	0	3.48	24.291	18.008	12.603	6.853	9.329	6.957	4.832	15.22	16.647	15.84	11.894	12.398	8.622	35.13	15.733	28.377	29.816	32.454	49.825	19.413	49.814
bmlnct_0105	-7.51416	4.00684	0.000142425	0.0023468	NA	NA	NA	NA	NA	NA	NA	NA	NA	NA	NA	NA	0	0	0	0.02	0.031	0.02	0.124	0.145	13.745	0	0	0.354	0.008	0.009	0.009	2.331	0.048	0.019	0.039	0	0.058	0	0	0.45
bmlnct_4331	NA	NA	NA	NA	1.31684	9.85875	7.49e-09	5.62e-07	NA	NA	NA	NA	NA	NA	NA	NA	92.638	0	0	146.928	144.174	177.063	89.73	89.032	39.41	98.929	81.087	123.296	65.578	168.144	133.675	201.159	191.912	156.445	100.7	118.544	113.364	323.412	281.594	169.295
bmlnct_1498	1.41535	6.04595	1.15e-07	4.7e-06	NA	NA	NA	NA	NA	NA	NA	NA	NA	NA	NA	NA	99.81	80.423	64.891	211.368	152.492	208.18	134.657	87.232	150.549	96.344	122.188	118.138	160.619	100.639	131.46	138.211	260.032	249.694	308.313	430.505	321.998	120.904	126.925	161.208
AK378014	-1.04748	9.8241	1.52e-18	3.71e-16	NA	NA	NA	NA	NA	NA	NA	NA	NA	NA	NA	NA	493.575	514.141	502.967	218.276	222.19	227.435	449.831	511.334	469.491	477.039	515.593	457.748	464.933	456.193	490.707	258.017	275.327	252.268	237.766	250.388	250.396	257.634	338.758	345.067
bmlnct_2090	7.35559	3.88487	1.74e-05	0.000365524	NA	NA	NA	NA	NA	NA	NA	NA	NA	NA	NA	NA	0	0	0	0	0	0	0	0	0	0	0	0	40.894	0	0	0	0	0	0	67.381	46.321	0	0	0
SilkDB_TCONS_00255451	NA	NA	NA	NA	-1.15697	9.39033	2.19e-08	1.52e-06	NA	NA	NA	NA	NA	NA	NA	NA	0	0	0	0	0	0	0	0	0	670.701	420.505	389.951	0	0	0	0	0	0	0	0	0	207.713	212.886	255.011
SilkDB_TCONS_00285770	NA	NA	NA	NA	NA	NA	NA	NA	-1.28683	5.21453	0.00125765	0.0374475	NA	NA	NA	NA	47.563	60.537	44.811	0	0	0	0	1.613	0	0	0	0	24.659	19.122	19.47	0	0	0	1.474	4.731	5.75	0	0	0
SilkDB_TCONS_00147875	NA	NA	NA	NA	NA	NA	NA	NA	NA	NA	NA	NA	6.44615	3.64326	0.000469708	0.0400853	0	0	2.655	0	0	0	0	0	0	0	0	0	0	0	0	2.227	0	1.141	0	1.53	0	0	0	0
bmlnct_0702	-1.73103	3.85152	0.00403577	0.0370834	NA	NA	NA	NA	NA	NA	NA	NA	NA	NA	NA	NA	0	3.839	0	0	0	0	19.009	29.736	24.455	0	0	8.91	0	0	0	0	0	0	3.172	12.224	7.754	0	4.656	5.835
bmlnct_3514	-1.04887	5.8047	6.35e-05	0.00116182	NA	NA	NA	NA	NA	NA	NA	NA	NA	NA	NA	NA	66.51	164.25	136.454	0	7.698	0	436.394	326.681	364.839	175.827	107.117	155.137	171.394	94.433	147.624	0	25.033	7.372	201.914	206.01	165.929	183.454	179.812	175.015
bmlnct_3671	NA	NA	NA	NA	1.79355	6.92614	1.19e-09	1.18e-07	NA	NA	NA	NA	NA	NA	NA	NA	273.64	287.784	145.904	77.126	67.025	37.679	30.21	87.501	33.775	68.778	193.004	82.852	288.39	196.698	317.555	34.648	28.334	49.613	87.38	96.943	107.309	337.549	386.136	466.35
bmlnct_4409	-1.14639	4.72416	0.00524883	0.0456461	NA	NA	NA	NA	NA	NA	NA	NA	NA	NA	NA	NA	40.827	23.788	45.24	51.14	13.725	35.164	52.207	55.686	40.541	91.52	10.475	79.221	33.242	56.36	21.651	98.243	49.06	42.514	30.193	14.505	25.905	36.771	15.505	31.964
bmlnct_1502	NA	NA	NA	NA	1.52968	5.78863	3.84e-06	0.000181038	NA	NA	NA	NA	NA	NA	NA	NA	11.598	6.571	15.677	0	2.755	0	0	2.679	10.172	53.97	52.191	45.183	9.961	10.08	12.083	6.404	0	0	5.831	9.476	2.73	117.856	175.715	139.19
bmlnct_2002	7.53906	4.05949	1.67e-05	0.000355945	2.40598	7.01162	8.73e-05	0.00299586	NA	NA	NA	NA	NA	NA	NA	NA	0	0	7.067	0	0	0	0	0	0	10.384	7.824	7.588	11.716	0	0	0	0	0	0	15.269	5.503	108.126	19.16	13.088
SilkDB_TCONS_00439162	NA	NA	NA	NA	NA	NA	NA	NA	3.18787	7.78847	4.88e-41	8.43e-38	NA	NA	NA	NA	27.941	41.705	29.473	0	0	0	0	1.158	2.319	3.967	1.582	0	336.8	296.75	270.29	0	0	0	1.053	3.414	0	2.369	0	3.938
SilkDB_TCONS_00550053	NA	NA	NA	NA	NA	NA	NA	NA	-1.24053	10.0235	2.26e-11	3.13e-09	NA	NA	NA	NA	293.049	279.743	324.424	38.642	41.402	38.741	21.705	26.964	18.305	33.194	36.506	38.181	148.306	131.74	100.614	51.196	42.177	53.468	16.847	19.972	19.763	42.475	34.001	49.814
bmlnct_0447	NA	NA	NA	NA	NA	NA	NA	NA	NA	NA	NA	NA	-6.28222	3.59463	3.94e-05	0.00547919	0	0	13.59	79.485	35.654	19.676	0	0	20.321	20.606	54.805	0	0	0	0	0	0	0	0	0	0	0	0	0
bmlnct_2814	-1.22606	7.47892	7.09e-14	1.07e-11	NA	NA	NA	NA	NA	NA	NA	NA	NA	NA	NA	NA	353.107	436.178	466.221	494.977	540.413	518.245	270.426	297.276	268.958	217.989	247.186	170.88	240.458	208.932	193.151	535.789	524.837	497.022	126.813	139.946	112.696	195.604	204.713	220.154
bmlnct_0157	1.31458	4.56927	0.00213411	0.0226484	NA	NA	NA	NA	NA	NA	NA	NA	NA	NA	NA	NA	40.436	49.846	38.552	8.573	4.437	8.035	10.976	7.178	4.548	15.52	11.443	11.61	19.376	22.101	29.227	5.243	5.866	5.213	19.44	20.949	19.051	4.684	13.261	5.164
bmlnct_1526	NA	NA	NA	NA	-1.50767	5.8509	1.66e-05	0.000691052	NA	NA	NA	NA	NA	NA	NA	NA	310.992	288.982	307.065	145.709	141.047	216.605	360.325	394.045	347.643	716.796	579.832	457.04	176.198	186.542	235.729	267.552	166.124	182.661	338.058	268.462	291.882	200.172	244.496	114.834
bmlnct_2302	-1.25035	5.30228	0.000117925	0.00197277	-1.83491	5.73384	2.32e-07	1.44e-05	NA	NA	NA	NA	NA	NA	NA	NA	466.47	586.696	645.92	111.715	97.468	116.983	293.57	252.874	194.417	358.767	363.17	251.479	333.122	300.488	386.796	138.172	90.704	120.294	123.615	107.552	95.823	78.142	90.659	89.194
bmlnct_0103	6.58432	3.32116	0.00391528	0.0363184	NA	NA	NA	NA	NA	NA	NA	NA	NA	NA	NA	NA	0	0	0.841	9.386	0	0	0	0	0	8.298	6.642	1.778	5.333	1.762	2.684	9.621	0	16.732	0	26.077	0	4.302	5.53	2.367
bmlnct_1008	NA	NA	NA	NA	NA	NA	NA	NA	1.43535	8.31639	1.17e-13	2.9e-11	NA	NA	NA	NA	359.39	481.186	498.803	337.692	447.3	334.681	425.16	428.921	574.558	523.21	583.051	696.1	1237.51	1182.25	1114.23	265.278	327.33	401.303	353.602	363.959	413.436	527.025	505.351	416.478
bmlnct_4276	NA	NA	NA	NA	NA	NA	NA	NA	1.12568	6.80035	2.21e-06	0.000143934	NA	NA	NA	NA	25.843	40.207	35.583	3.409	8.834	12.423	51.454	42.251	54.32	708.421	694.327	707.97	84.761	68.79	68.763	2.084	7.773	6.043	48.935	47.593	50.503	633.484	663.781	561.781
bmlnct_2424	NA	NA	NA	NA	1.0917	7.49824	1.94e-09	1.74e-07	NA	NA	NA	NA	NA	NA	NA	NA	39.058	51.643	43.558	3.32	1.538	3.526	25.637	35	24.847	26.421	23.128	18.89	64.713	63.903	74.557	2.712	3.427	2.017	26.086	31.304	23.175	49.177	53.308	45.023
bmlnct_0237	1.20854	4.77996	0.00203462	0.0219105	NA	NA	NA	NA	NA	NA	NA	NA	NA	NA	NA	NA	6.434	10.891	5.641	28.147	29.72	11.781	59.543	45.871	75.683	23.743	42.004	48.897	0	9.237	0.477	0	12.943	11.444	146.529	178.871	117.88	38.641	23.352	25.458
bmlnct_2948	-1.03011	6.93209	2.26e-09	1.57e-07	NA	NA	NA	NA	-1.18777	6.82423	1.04e-06	7.46e-05	NA	NA	NA	NA	199.255	263.624	293.763	732.153	674.566	717.509	327.161	313.246	327.725	258.643	281.636	192.126	126.276	102.316	98.356	550.111	675.327	746.443	165.627	167.355	170.561	114.212	183.383	202.112
bmlnct_0117	NA	NA	NA	NA	NA	NA	NA	NA	-1.24322	8.24802	6.76e-10	7.3e-08	NA	NA	NA	NA	207.138	284.816	234.414	9.732	20.257	22.752	18.436	14.687	13.6	18.097	7.07	13.183	91.917	103.21	112.586	23.914	15.595	23.765	17.492	17.536	11.384	7.106	13.725	16.097
bmlnct_3113	-1.68609	4.65284	0.00146051	0.0164561	NA	NA	NA	NA	NA	NA	NA	NA	NA	NA	NA	NA	119.219	86.776	136.314	21.516	18.616	11.09	46.511	71.459	25.261	55.411	62.378	37.977	124.269	96.178	113.276	9.944	13.62	22.181	22.993	16.7	6.665	74.786	7.3	35.289
bmlnct_4395	-1.01306	5.97421	8.64e-06	0.000201442	-1.35003	5.18557	0.00183114	0.0377957	NA	NA	NA	NA	NA	NA	NA	NA	17.863	27.491	29.283	13.558	21.196	18.854	132.815	129.204	132.334	58.878	62.992	73.868	22.971	17.598	25.656	19.432	12.923	20.635	76.956	60.865	69.046	24.249	28.44	23.82
bmlnct_4280	-6.00092	2.82937	0.00208729	0.0222593	NA	NA	NA	NA	7.04057	4.24929	1.49e-07	1.26e-05	NA	NA	NA	NA	0	0	0	56.452	16.831	0	0	56.741	16.938	69.999	0	100.365	82.787	19.683	90.756	70.228	0	0	0	0	0	28.699	33.559	0
bmlnct_4037	-6.42546	3.12787	1.14e-05	0.000256349	NA	NA	NA	NA	NA	NA	NA	NA	NA	NA	NA	NA	217.563	134.771	188.382	68.414	6.893	0	43.86	8.947	44.854	76.314	61.057	45.555	31.857	7.85	141.472	90.564	0	92.344	0	0	0	0	118.172	144.144
bmlnct_2886	2.51749	3.30452	0.00283133	0.027887	NA	NA	NA	NA	NA	NA	NA	NA	NA	NA	NA	NA	203.903	212.416	0	0	0	0	0	24.647	0	17.767	0	5.716	21.82	36.804	0	0	0	86.98	56.332	48.018	59.898	0	17.885	80.331
SilkDB_TCONS_00285773	NA	NA	NA	NA	NA	NA	NA	NA	-1.57349	6.90859	2.94e-13	6.29e-11	NA	NA	NA	NA	63.729	72.518	68.841	0.674	0	0	0	0	1.658	0	0	0.754	21.938	22.97	23.262	0	0.765	0	1.487	0	2.135	0	0	0
DC549813	NA	NA	NA	NA	NA	NA	NA	NA	-1.03354	6.13831	0.000159496	0.00671828	NA	NA	NA	NA	95.073	76.602	90.802	1.655	12.043	6.903	106.762	135.472	126.15	15.114	4	7.467	41.129	36.941	48.867	2.027	5.673	1.678	115.27	95.059	92.584	2.985	4.635	7.474
AK377874	NA	NA	NA	NA	NA	NA	NA	NA	1.25929	11.8253	2.11e-12	3.84e-10	NA	NA	NA	NA	440.04	614.686	554.978	672.351	694.204	698.274	136.87	117.247	122.039	216.133	215.872	216.715	1377.3	1259.39	1228.61	765.573	735.394	798.987	132.946	121.263	145.28	137.356	172.534	165.673
bmlnct_2507	1.03535	7.31034	3.25e-08	1.55e-06	NA	NA	NA	NA	NA	NA	NA	NA	NA	NA	NA	NA	0	0	0	0	0	0	173.214	268.658	210.661	4.577	18.002	26.711	0	0	0	0	0	0	505.37	444.683	470.589	15.762	12.408	17.86
SilkDB_TCONS_00541318	-5.6591	2.60666	0.000983973	0.0121145	NA	NA	NA	NA	-1.97191	7.20795	2.49e-17	9.57e-15	NA	NA	NA	NA	77.53	114.876	93.069	0	0	0	7.089	3.041	1.355	0	0	0	23.004	26.792	22.18	0	0	0	0	0	0	0	0	0
bmlnct_2839	-1.31838	4.93105	0.00110391	0.013329	NA	NA	NA	NA	NA	NA	NA	NA	NA	NA	NA	NA	37.121	22.509	16.93	83.429	74.951	96.216	83.27	72.287	64.649	17.334	12.308	11.461	27.212	28.597	38.276	78.355	97.907	96.322	18.176	51.078	24.99	22.624	24.247	18.099
bmlnct_1316	NA	NA	NA	NA	-1.00446	6.06017	0.000922082	0.0217162	NA	NA	NA	NA	NA	NA	NA	NA	0.631	0.617	1.798	0.565	2.9	1.753	2.573	5.947	2.476	31.202	29.761	27.856	0.63	1.89	1.278	0.685	1.917	2.272	0.447	0.496	1.191	17.44	9.469	18.569
SilkDB_TCONS_00320719	NA	NA	NA	NA	-3.1075	4.12019	0.000121976	0.0037978	NA	NA	NA	NA	NA	NA	NA	NA	2.915	2.078	1.814	0	30.071	31.608	65.374	38.258	75.459	23.539	28.068	16.637	10.305	14.175	13.165	16.396	20.251	0	86.762	119.351	126.273	0	3.824	3.354
bmlnct_4134	NA	NA	NA	NA	1.81623	4.76521	0.000497466	0.0127811	NA	NA	NA	NA	NA	NA	NA	NA	0	0	0	0	0	0	28.906	10.343	17.084	19.708	19.881	26.879	12.472	13.962	0	0	0	0	38.564	55.072	68.698	74.138	61.735	104.208
SilkDB_TCONS_00018753	NA	NA	NA	NA	NA	NA	NA	NA	-1.22619	8.55829	4.59e-09	4.28e-07	NA	NA	NA	NA	1250.39	1560.28	1714.12	0	0	0	0	4.365	0	7.586	5.88	0	651.571	491.354	736.577	0	0	0	0	4.15	5.039	0	0	0
bmlnct_4258	NA	NA	NA	NA	NA	NA	NA	NA	1.19507	9.83948	1.64e-09	1.67e-07	NA	NA	NA	NA	336.017	421.965	466.865	421.072	487.917	479.164	566.423	717.768	613.442	619.393	699.322	709.376	1091.85	778.79	924.453	430.257	455.188	485.352	647.463	666.643	546.983	672.805	666.783	767.658
bmlnct_3591	2.50297	3.47744	0.00119294	0.0141699	NA	NA	NA	NA	NA	NA	NA	NA	NA	NA	NA	NA	96.344	133.682	18.728	132.151	267.73	277.797	41.366	46.709	0	27.989	82.352	55.508	92.378	87.06	129.841	265.002	190.47	303.002	95.462	210.883	250.672	153.883	198.761	123.074
bmlnct_4220	1.72297	7.17004	3.92e-06	9.88e-05	NA	NA	NA	NA	NA	NA	NA	NA	NA	NA	NA	NA	0	0	0	0	0	0	120.636	164.753	440.108	0	0	64.241	0	0	0	0	0	0	1041.21	881.661	595.352	0	0	0
bmlnct_0085	NA	NA	NA	NA	-1.65507	5.18897	0.000867604	0.020565	NA	NA	NA	NA	NA	NA	NA	NA	1.653	4.075	1.872	0.723	1.527	1.523	31.884	38.083	38.066	25.438	25.388	16.423	4.065	2.469	4.38	2.779	0.939	0	29.68	20.581	24.627	5.364	12.292	3.756
bmlnct_0535	NA	NA	NA	NA	2.00137	5.39197	7.15e-06	0.000324258	NA	NA	NA	NA	NA	NA	NA	NA	10.611	0	10.522	15.015	10.97	18.063	0	2.193	13.017	9.299	19.509	29.653	13.153	12.77	11.444	0	8.199	13.047	12.333	8.995	11.413	64.185	112.484	75.722
AK382731	-1.10687	11.4342	6.75e-17	1.4e-14	NA	NA	NA	NA	NA	NA	NA	NA	NA	NA	NA	NA	511.26	573.862	610.625	436.661	474.863	451.854	1827.26	2257	1795.36	4305.62	3485.71	3292.3	609.745	551.605	569.389	553.708	512.795	522.285	1000.99	957.286	952.708	2790.27	2709.47	3320.15
bmlnct_3034	NA	NA	NA	NA	1.89301	5.41986	0.000419219	0.0110015	NA	NA	NA	NA	NA	NA	NA	NA	27.532	31.548	0	57.116	64.91	25.226	0	49.294	17.834	125.24	0	84.928	51.485	23.77	51.057	32.526	49.728	28.874	74.048	56.588	65.619	224.335	272.694	249.137
SilkDB_TCONS_00175411	-1.50896	4.25682	0.00128963	0.0151116	NA	NA	NA	NA	NA	NA	NA	NA	NA	NA	NA	NA	0	0	0	0	3.89	0	34.501	34.959	31.815	0	0	0	0	0	0	0	0	0	7.568	17.876	11.82	0	0	0
bmlnct_2348	-5.64536	2.60493	0.00503491	0.0443133	NA	NA	NA	NA	NA	NA	NA	NA	NA	NA	NA	NA	0	0	0	37.285	38.915	5.32	0	3.806	9.757	5.23	0	6.908	0	3.082	8.461	28.177	44.22	17.552	0	0	0	0	0	0
bmlnct_4427	-1.37514	9.50301	2.45e-28	2.14e-25	NA	NA	NA	NA	NA	NA	NA	NA	NA	NA	NA	NA	373.023	404.602	340.686	10.515	11.413	6.802	1025.41	1101.41	1109.83	616.969	649.076	575.588	296.259	310.687	317.129	16.729	29.418	13.075	421.49	416.128	495.507	596.543	642.609	686.359
bmlnct_0773	NA	NA	NA	NA	NA	NA	NA	NA	1.74657	6.40975	2.1e-10	2.5e-08	NA	NA	NA	NA	22.36	25.304	21.325	10.466	8.689	4.358	0	0.931	1.86	4.747	3.796	1.182	69.819	66.84	95.178	16.663	10.755	6.372	0.842	0.907	1.104	5.704	4.413	6.305
bmlnct_0354	5.66653	2.64628	0.00423392	0.0386922	NA	NA	NA	NA	NA	NA	NA	NA	NA	NA	NA	NA	0	0	0	0	0	0	0	0	0	0	0	0	0	0	0	0	0	0	0	57.551	23.974	0	0	0
bmlnct_4100	NA	NA	NA	NA	1.71556	5.13469	0.000208597	0.00623079	NA	NA	NA	NA	NA	NA	NA	NA	155.158	40.969	74.548	38.276	18.72	44.641	34.569	42.261	47.935	12.884	25.826	38.963	142.763	95.914	110.149	41.813	27.24	73.877	88.802	60.058	79.603	82.072	70.046	118.552
bmlnct_4205	NA	NA	NA	NA	1.76159	6.47818	4.07e-12	5.75e-10	NA	NA	NA	NA	NA	NA	NA	NA	25.657	25.885	27.865	11.933	12.291	16.57	39.467	28.009	29.227	14.418	17.611	25.808	23.181	33.603	33.572	15.911	14.714	20.239	33.997	33.471	31.989	68.179	71.51	63.803
bmlnct_4036	NA	NA	NA	NA	-5.49521	3.41803	0.000305919	0.00832554	NA	NA	NA	NA	NA	NA	NA	NA	0	0	0	6.006	6.347	12.573	0	0	0	57.572	35.492	44.242	0	13.111	0	0	20.716	0	17.702	40.27	0	0	0	0
bmlnct_4405	NA	NA	NA	NA	1.26362	7.39092	5.55e-13	8.86e-11	NA	NA	NA	NA	NA	NA	NA	NA	1.431	1.407	0	65.015	59.585	54.469	0	0	0	79.255	83.217	77.424	2.881	1.43	0	64.052	61.141	54.364	2.066	1.204	2.701	191.759	189.734	203.472
bmlnct_3492	NA	NA	NA	NA	NA	NA	NA	NA	1.40642	5.3266	0.000512025	0.0184222	NA	NA	NA	NA	16.912	28.426	27.32	0	0	0	29.131	80.902	15.526	40.145	28.812	9.822	49.729	84.421	54.423	0	0	0	20.598	13.641	2.12	10.165	0	0
AK382643	-1.3088	9.36158	5.31e-20	1.66e-17	-1.06408	10.3844	6.55e-22	4.01e-19	NA	NA	NA	NA	NA	NA	NA	NA	116.793	164.186	161.581	180.377	192.49	217.707	254.99	326.94	278.334	531.594	499.648	455.42	157.956	159.426	177.83	216.375	182.716	197.564	125.747	116.447	128.552	226.162	252.291	246.378
bmlnct_3483	NA	NA	NA	NA	NA	NA	NA	NA	-2.38159	4.82237	1.6e-06	0.00011086	NA	NA	NA	NA	20.413	19.396	15.248	1.516	1.569	0	2.078	2.017	2.689	0	1.833	0.857	3.427	4.248	2.582	0.923	0.862	1.537	1.843	0.666	0	1.381	0	1.14
bmlnct_0624	NA	NA	NA	NA	NA	NA	NA	NA	3.61114	3.72949	0.00157508	0.0442304	NA	NA	NA	NA	0	16.292	0	246.978	106.487	42.518	38.456	0	0	53.707	48.2	34.802	108.865	122.4	22.572	18.642	94.335	130.362	35.616	0	0	0	8.184	0
bmlnct_0398	-1.54708	5.19273	3.9e-05	0.000753734	NA	NA	NA	NA	NA	NA	NA	NA	NA	NA	NA	NA	0	0	0.478	0	0	0.461	18.256	20.158	10.665	0	0	0	0	0	0.511	0	0.513	0.452	5.738	4.844	7.711	0	0	0
SilkDB_TCONS_00375592	-5.80296	2.69947	0.00016349	0.00261525	NA	NA	NA	NA	NA	NA	NA	NA	NA	NA	NA	NA	0	0.009	11.652	0	65.126	64.337	3.191	8.202	5.097	0	0.354	4.097	19.149	9.782	37.304	1.313	80.782	0	0	0	0	5.884	0	4.848
bmlnct_2834	NA	NA	NA	NA	NA	NA	NA	NA	NA	NA	NA	NA	6.30571	3.56691	1.76e-05	0.0030069	0	0	0	0	0	0	2.595	16.094	0	0	37.994	0	106.161	0	0	68.982	47.734	137.564	0	0	0	0	0	0
SilkDB_TCONS_00001773	NA	NA	NA	NA	NA	NA	NA	NA	1.00762	9.33212	7.95e-09	7.22e-07	NA	NA	NA	NA	157.842	170.022	147.257	46.175	42.733	42.708	53.533	32.177	43.443	19.793	29.296	29.718	360.939	294.894	299.968	39.082	28.412	31.721	53.121	47.777	66.578	53.256	46.662	39.763
bmlnct_3708	NA	NA	NA	NA	-1.10783	6.80409	8.24e-07	4.59e-05	4.20541	5.15519	7.04e-05	0.00328367	NA	NA	NA	NA	0	14.476	10.184	473.718	406.393	469.817	513.778	350.015	586.489	427.121	347.754	350.838	157.713	5.9	265.876	382.439	393.117	406.752	829.582	629.461	682.898	197.431	171.796	144.671
bmlnct_0288	1.6589	8.22197	3.38e-26	2.12e-23	1.72502	8.88063	2.64e-29	4.85e-26	NA	NA	NA	NA	NA	NA	NA	NA	161.095	255.737	257.264	12.547	12.084	8.395	75.406	106.356	92.05	119.052	112.522	145.668	192.467	121.557	149.72	16.453	9.206	17.26	306.668	316.678	299.709	375.362	478.776	416.832
bmlnct_2875	NA	NA	NA	NA	NA	NA	NA	NA	1.00611	8.3234	7.36e-07	5.53e-05	NA	NA	NA	NA	172.23	220.676	219.578	1611.43	1719.94	1579.01	233.577	237.401	200.489	229.365	238.516	236.276	451.503	443.618	328.138	1807.8	1869.38	1986	173.497	228.602	160.876	369.509	381.186	379.513
bmlnct_2906	NA	NA	NA	NA	1.74878	6.1527	8.14e-09	5.98e-07	NA	NA	NA	NA	NA	NA	NA	NA	0	31.648	77.393	0	0	2.254	0	0	6.665	65.057	49.084	61.438	27.347	25.294	78.281	0	0	12.255	37.261	0	0	237.389	206.008	155.028
bmlnct_1100	2.29987	3.79566	0.00510824	0.0447788	NA	NA	NA	NA	NA	NA	NA	NA	NA	NA	NA	NA	0	225.858	43.607	84.688	41.247	1.282	0	0	87.715	140.252	131.501	45.574	194.323	2.316	0	16.615	0	0	148.819	171.491	156.461	25.237	124.955	27.662
bmlnct_4353	-1.36392	7.85264	1.26e-12	1.49e-10	NA	NA	NA	NA	NA	NA	NA	NA	NA	NA	NA	NA	106.573	110.764	108.919	140.139	147.466	130.067	116.907	170.669	121.109	78.746	65.141	63.645	97.812	71.199	85.115	141.893	161.99	154.334	53.489	61.956	53.872	62.794	75.892	89.577
SilkDB_TCONS_00395096	NA	NA	NA	NA	NA	NA	NA	NA	7.23219	4.40834	3.59e-10	4.14e-08	-7.57481	4.62121	2.01e-10	1.57e-07	0	0	0	24.509	8.328	9.107	148.049	63.868	123.013	33.669	38.366	56.318	13.346	7.049	14.511	0	0	0	188.923	233.645	212.294	28.476	32.663	0
bmlnct_3223	NA	NA	NA	NA	-2.45261	5.95917	0.00202943	0.0407439	6.57877	3.89288	2.42e-07	1.95e-05	NA	NA	NA	NA	0	0	0	223.856	285.149	261.116	310.242	477.388	440.287	309.874	352.685	329.825	54.139	95.429	58.564	0	136.444	198.083	651.912	635.056	608.696	0	0	181.205
bmlnct_3249	NA	NA	NA	NA	-5.48627	3.41692	0.000403712	0.0107481	NA	NA	NA	NA	NA	NA	NA	NA	0	0	0	22.389	13.034	14.256	3.247	3.734	23.962	16.427	17.909	15.017	12.481	5.593	3.11	20.355	16.999	8.107	17.466	8.952	34.879	0	0	0
SilkDB_TCONS_00375581	-2.49923	3.18902	0.00112772	0.0135473	NA	NA	NA	NA	NA	NA	NA	NA	NA	NA	NA	NA	4.364	0	0	14.371	9.525	6.412	5.752	9.567	7.326	0	0	0	0	0	0	0	0	30.448	2.922	0.609	0	9.06	0	0
bmlnct_2820	-1.97759	6.24341	5.9e-18	1.36e-15	NA	NA	NA	NA	NA	NA	NA	NA	NA	NA	NA	NA	23.968	33.908	24.822	59.217	66.819	56.723	138.567	154.317	141.43	8.087	4.382	4.18	14.857	12.966	8.938	65.613	68.75	76.158	44.355	42.281	28.896	3.218	10.259	7.991
bmlnct_3917	NA	NA	NA	NA	NA	NA	NA	NA	NA	NA	NA	NA	2.37176	4.96037	1.75e-05	0.0030069	19.738	0	35.254	18.781	0	19.345	0	22.175	0	0	0	36.664	28.178	0	22.469	86.957	53.571	76.403	19.861	13.442	31.249	70.155	47.768	0
bmlnct_1875	-2.3023	3.58472	0.000505991	0.00686662	NA	NA	NA	NA	NA	NA	NA	NA	NA	NA	NA	NA	0	0	0	0	0	0	25.783	17.624	33.069	0	0	0	0	0	0	0	2.507	0	3.554	5.722	6.926	0	0	0
bmlnct_4441	NA	NA	NA	NA	-1.49425	5.98489	1.05e-06	5.65e-05	NA	NA	NA	NA	NA	NA	NA	NA	12.015	14.023	15.611	32.468	28.853	38.18	15.178	15.008	5.926	101.336	80.938	97.292	16.562	10.855	6.953	14.16	30.609	36.132	12.648	12.918	13.766	23.58	32.253	41.67
bmlnct_0856	-1.03532	9.71763	4.49e-16	8.21e-14	NA	NA	NA	NA	NA	NA	NA	NA	NA	NA	NA	NA	301.607	441.596	451.518	317.731	296.325	304.576	217.737	245.272	216.732	637.253	631.381	638.553	452.41	463.898	460.075	315.132	324.852	366.085	122.496	121.646	109.269	596.978	606.132	608.127
bmlnct_3496	1.37153	5.96512	4.99e-07	1.75e-05	NA	NA	NA	NA	NA	NA	NA	NA	NA	NA	NA	NA	87.661	82.302	70.573	2999.85	2888.88	2875.52	54.049	36.728	45.84	7.527	13.145	12.83	108.689	72.068	113.856	3423.82	4094.6	3350.04	131.722	94.676	150.624	29.836	26.954	18.051
bmlnct_4387	NA	NA	NA	NA	1.40834	6.15112	1.42e-05	0.000598149	NA	NA	NA	NA	NA	NA	NA	NA	26.812	18.887	27.304	116.066	105.496	99.301	21.817	25.94	30.202	47.095	34.087	56.886	37.307	35.553	25.554	110.966	114.17	87.027	33.141	22.281	49.806	82.592	159.22	127.462
bmlnct_1545	NA	NA	NA	NA	NA	NA	NA	NA	NA	NA	NA	NA	-3.22691	4.75753	2.05e-05	0.00321038	19.889	217.336	142.408	74.975	49.42	103.749	441.079	395.524	442.875	738.521	440.842	318.699	95.923	201.917	71.337	26.274	0	0	459.672	393.634	341.761	317.868	239.82	253.373
bmlnct_2407	NA	NA	NA	NA	5.65525	3.34121	0.000732296	0.0179364	NA	NA	NA	NA	NA	NA	NA	NA	0	0	0	2.775	0	0	0	2.1	0	0	0	0	0	0	0	2.75	0	0	3.975	0	2.222	15.943	4.793	3.612
bmlnct_2675	5.41859	2.5396	0.00564453	0.0482261	NA	NA	NA	NA	NA	NA	NA	NA	NA	NA	NA	NA	0	0	0	0	0	0	0	0	0	0	0	0	0	0	0	0	0	11.642	44.184	24.505	0	0	0	0
bmlnct_2239	-1.13334	6.39373	1.5e-07	5.92e-06	NA	NA	NA	NA	NA	NA	NA	NA	NA	NA	NA	NA	39.618	38.238	35.864	25.144	31.299	27.44	49.679	56.059	52.069	84.129	59.141	62.798	28.077	28.614	33.427	25.769	22.42	27.63	22.704	22.253	32.541	52.555	41.417	40.97
bmlnct_3475	-1.91213	4.58659	6.35e-05	0.00116182	NA	NA	NA	NA	NA	NA	NA	NA	NA	NA	NA	NA	1.191	1.162	0	25.421	17.584	25.386	29.03	15.028	34.716	0	0	0	1.201	2.375	1.201	16.862	10.881	21.483	8.568	5.538	7.841	0	1.485	0
bmlnct_3882	NA	NA	NA	NA	-1.03267	5.74906	0.00210888	0.0421088	NA	NA	NA	NA	NA	NA	NA	NA	161.228	344.165	361.046	222.607	280.072	389.31	271.258	244.972	489.409	493.61	572.101	444.22	101.819	268.485	120.289	159.165	76.445	175.327	415.594	375.673	472.68	211.855	183.878	289.447
bmlnct_3746	-2.31479	5.10265	2.04e-10	1.66e-08	NA	NA	NA	NA	NA	NA	NA	NA	NA	NA	NA	NA	2.968	38.728	33.489	2.061	98.717	0	92.427	110.018	92.879	23.098	4.521	27.037	10.465	0	0	18.708	32.245	57.635	22.454	12.182	27.56	0	0	0
bmlnct_4481	1.03091	12.6768	0.00247555	0.0252333	-1.38153	10.3923	1.1e-07	7.24e-06	-3.39258	11.5732	0.000229442	0.00943444	NA	NA	NA	NA	13853.8	419.051	561.328	1292.19	1013.08	552.748	2548.36	6390.96	4792.06	1138.52	2827.55	1609.71	491.431	413.702	479.383	806.834	1073.44	518.581	15208	8913.61	5657.28	570.021	760.444	829.372
bmlnct_2212	5.55313	2.55532	0.00519941	0.0453439	NA	NA	NA	NA	NA	NA	NA	NA	NA	NA	NA	NA	0	0	0	0	0	0	0	0	0	0	35.017	0	0	0	0	0	0	0	0	28.216	31.467	0	0	0
AK379607	NA	NA	NA	NA	NA	NA	NA	NA	-1.20755	8.57575	2.93e-11	3.89e-09	NA	NA	NA	NA	86.959	92.04	106.074	6.145	5.098	5.781	8.224	9.495	6.598	12.901	11.127	9.729	41.7	40.457	41.616	6.395	8.77	5.609	9.029	11.063	10.048	19.193	17.338	16.451
bmlnct_2259	NA	NA	NA	NA	7.01582	4.23514	0.000181776	0.00551939	8.38689	5.42293	1.42e-06	0.000100036	NA	NA	NA	NA	0	0	0.008	11.467	7.874	0	7.527	1.086	5.344	0	0	0	12.136	2.971	0	0.837	7.251	3.516	5.265	11.091	11.675	6.192	1.201	0
bmlnct_0756	5.1177	2.33506	0.00227611	0.0239238	NA	NA	NA	NA	NA	NA	NA	NA	NA	NA	NA	NA	0	0	0.866	0	0	0	0	0	0	18.326	9.778	9.143	0	0	0	0	0	0	3.935	2.125	3.427	7.382	10.249	21.942
bmlnct_3570	-1.212	7.39527	1.49e-11	1.36e-09	NA	NA	NA	NA	NA	NA	NA	NA	NA	NA	NA	NA	73.558	123.117	114.848	3015.09	3464.48	3223.35	341.137	378.386	439.301	36.008	43.52	31.543	128.602	161.001	150.938	3219.59	3802.88	3865.49	197.373	178.12	154.501	64.77	20.635	57.259
bmlnct_0423	-6.28125	3.02312	5.14e-06	0.00012519	NA	NA	NA	NA	NA	NA	NA	NA	NA	NA	NA	NA	29.194	58.813	0	196.849	136.971	243.033	21.975	55.655	31.255	29.337	0	69.622	43.707	0	0	428.278	168.534	326.889	0	0	0	77.228	37.709	0
bmlnct_3739	-1.1211	6.66144	8.97e-09	5.11e-07	NA	NA	NA	NA	NA	NA	NA	NA	NA	NA	NA	NA	153.638	219.75	237.201	12.884	18.348	18.634	193.009	162.125	170.892	229.628	278.157	247.476	203.889	174.571	207.202	12.799	13.223	15.658	89.908	73.174	92.497	275.998	301.871	285.269
bmlnct_3756	NA	NA	NA	NA	NA	NA	NA	NA	NA	NA	NA	NA	-1.05239	5.81774	0.000323328	0.0319499	18.947	19.16	22.95	144.51	156.33	140.977	36.231	36.242	24.287	33.168	0	11.405	32.495	50.409	21.958	69.952	81.276	66.213	82.616	63.457	36.505	0	5.467	6.448
bmlnct_0679	NA	NA	NA	NA	-1.39775	5.9117	1.81e-05	0.000740676	NA	NA	NA	NA	NA	NA	NA	NA	181.49	352.016	272.017	0	0	0	237.015	246.534	325.944	206.606	280.278	237.318	206.216	211.061	223.161	5.786	0	0	179.46	242.88	171.636	48.784	110.472	105.952
bmlnct_3286	1.73786	4.81469	0.00543847	0.0469429	NA	NA	NA	NA	NA	NA	NA	NA	NA	NA	NA	NA	46.115	52.859	54.105	201.051	208.454	309.795	61.857	16.228	2.745	11.07	31.026	0	33.058	31.151	35.038	296.785	375.306	314.597	117.455	66.333	106.016	3.558	91.955	57.01
bmlnct_0154	NA	NA	NA	NA	NA	NA	NA	NA	5.78558	3.33758	9.87e-05	0.00437282	NA	NA	NA	NA	0	0	0	188.653	122.101	219.29	21.301	0	19.436	0	117.993	0	58.926	78.291	99.566	149.963	124.944	115.515	0	63.372	1.35	85.736	48.516	36.304
CK553769	NA	NA	NA	NA	-2.04401	5.32729	1.12e-05	0.000490164	NA	NA	NA	NA	NA	NA	NA	NA	0	0.064	0	2.864	0	3.386	0	0	0	66.116	52.833	61.969	1.881	0	3.783	0	1.897	0	1.342	4.349	1.815	3.271	11.66	27.556
AU002389	-1.54207	9.16851	2.05e-21	8.15e-19	NA	NA	NA	NA	NA	NA	NA	NA	NA	NA	NA	NA	939.347	854.612	963.029	568.258	528.7	571.613	733.166	962.689	724.513	666.098	709.389	619.039	998.592	840.642	993.429	720.733	620.44	636.556	322.435	291.904	269.012	477.646	414.639	472.539
bmlnct_4077	-1.32322	5.10831	7.29e-05	0.00130442	NA	NA	NA	NA	NA	NA	NA	NA	NA	NA	NA	NA	0	0	0	0	0	5.821	171.596	192.544	188.827	17.673	40.822	12.513	0	0	12.602	6.871	0	11.303	95.291	81.517	52.246	0	7.689	8.384
bmlnct_2351	-7.213	3.74828	2.4e-05	0.000495844	NA	NA	NA	NA	NA	NA	NA	NA	NA	NA	NA	NA	0	0	0	79.346	0	0	0	68.067	83.682	0	0	36.077	8.718	0	0	0	0	0	0	0	0	70.59	0	0
bmlnct_4228	NA	NA	NA	NA	1.40067	5.71943	4.99e-05	0.0018142	NA	NA	NA	NA	NA	NA	NA	NA	57.135	48.548	63.844	23.31	12.187	27.63	44.567	44.464	49.739	36.008	60.173	56.886	46.084	61.392	23.424	28.976	30.416	5.92	33.444	35.397	49.937	129.921	109.05	171.748
bmlnct_1525	NA	NA	NA	NA	NA	NA	NA	NA	-1.20376	10.7184	7.38e-14	1.96e-11	NA	NA	NA	NA	233.204	204.475	225.4	1.288	2.322	2.505	5.617	12.039	7.394	30.32	34.078	26.869	91.051	93.539	104.176	1.96	3.659	1.631	10.516	9.278	10.237	47	50.307	54.662
bmlnct_2799	1.05006	5.03003	0.00335901	0.0324285	NA	NA	NA	NA	NA	NA	NA	NA	NA	NA	NA	NA	75.015	60.764	87.561	52.964	25.056	22.291	63.531	48.684	78.495	95.081	77.198	45.844	49.108	42.176	38.352	27.901	35.411	36.764	139.553	169.338	106.51	55.008	52.002	28.534
bmlnct_2751	1.06461	4.82577	0.00349488	0.0334894	NA	NA	NA	NA	NA	NA	NA	NA	NA	NA	NA	NA	49.038	55.727	48.662	9.792	12.002	14.847	11.403	9.464	11.046	77.984	68.825	61.336	45.312	49.924	66.812	15.264	11.181	15.347	26.666	20.978	23.567	77.866	73.89	97.875
CA946002	-1.22501	7.05103	1.05e-11	1.02e-09	NA	NA	NA	NA	NA	NA	NA	NA	NA	NA	NA	NA	294.986	411.918	367.651	317.256	356.983	341.293	185.516	213.478	172.875	395.817	364.379	310.385	352.027	335.087	363.823	406.828	382.401	336.589	80.155	90.03	90.726	236.816	228.718	280.526
bmlnct_3988	NA	NA	NA	NA	NA	NA	NA	NA	NA	NA	NA	NA	7.35199	4.439	5.61e-05	0.00752621	50.469	20.14	0	0	3.323	0	11.178	52.749	0	0	0	0	0	0	0	0	39.805	370.261	0	0	0	46.713	0	0
bmlnct_3516	-1.21406	5.42665	7.74e-05	0.00136235	NA	NA	NA	NA	NA	NA	NA	NA	NA	NA	NA	NA	42.853	27.265	36.853	18.999	29.669	37.639	65.486	94.845	72.457	55.114	59.82	38.572	32.201	38.124	38.847	25.646	30.406	34.7	27.719	41.318	38.088	23.898	29.272	34.33
bmlnct_0138	2.12844	3.39516	0.00534729	0.0463185	NA	NA	NA	NA	NA	NA	NA	NA	NA	NA	NA	NA	4.212	10.791	9.764	0	3.498	0	4.786	0	9.332	14.58	4.949	4.218	35.157	12.353	16.931	0	4.927	0	14.754	24.009	29.55	5.353	3.918	12.034
SilkDB_TCONS_00375585	NA	NA	NA	NA	NA	NA	NA	NA	NA	NA	NA	NA	7.11417	4.11836	8.2e-05	0.0102598	2.631	0	10.094	0	0	0	3.078	0	0.224	0	0	0	0	0	0	41.899	16.36	0	4.791	12.054	0	0	0	0
bmlnct_1354	NA	NA	NA	NA	-8.09692	5.34802	2.11e-06	0.000104866	NA	NA	NA	NA	NA	NA	NA	NA	0	0	0	0	0	60.51	0	128.966	150.089	226.966	0	73.691	0	0	0	0	0	0	394.627	438.791	333.31	0	0	0.01
bmlnct_3618	-1.45226	4.85408	5.42e-05	0.0010147	NA	NA	NA	NA	NA	NA	NA	NA	NA	NA	NA	NA	44.426	35.615	53.305	27.572	37.8	41.175	95.538	105.819	97.942	11.282	12.987	0	49.494	51.124	56.187	56.963	53.735	28.959	34.721	40.072	41.094	6.267	14.862	5.366
bmlnct_2209	1.1573	5.9816	0.000162118	0.0026028	NA	NA	NA	NA	NA	NA	NA	NA	NA	NA	NA	NA	0	0	0	0	0	40.824	380.311	176.978	437.677	123.511	146.749	0	0	0	0	0	173.791	0	801.929	908.616	655.003	0	0	0
SilkDB_TCONS_00178134	NA	NA	NA	NA	NA	NA	NA	NA	NA	NA	NA	NA	-6.39893	3.66545	0.000547898	0.0447252	0	0	0	0	6.749	5.971	0	1.696	0	25.065	13.192	11.461	2.965	0	0	0	0	0	0	1.275	1.931	9.772	9.785	11.028
bmlnct_1775	1.19606	4.73397	0.0015176	0.0169253	NA	NA	NA	NA	NA	NA	NA	NA	NA	NA	NA	NA	21.791	23.18	18.761	5.213	13.519	5.44	5.999	4.613	5.355	4.153	5.666	7.309	8.819	18.815	14.656	8.298	11.916	13.226	13.543	11.856	14.811	4.78	7.352	14.19
bmlnct_3577	3.73964	3.97354	1.62e-05	0.000348265	NA	NA	NA	NA	NA	NA	NA	NA	NA	NA	NA	NA	0	0	2.029	254.758	130.005	17.452	0	0	14.249	20.488	0	5.828	0	0	0	63.567	234.089	207.246	75.324	114.719	24.061	0	108.934	0
bmlnct_3668	1.0485	5.44219	0.000324	0.00464082	NA	NA	NA	NA	NA	NA	NA	NA	NA	NA	NA	NA	7.367	7.197	7.026	108.623	89.728	84.564	21.48	24.409	28.992	7.942	6.326	1.48	16.277	21.957	23.799	137.944	119.581	152.646	58.28	59.321	47.047	7.116	18.37	13.797
SilkDB_TCONS_00180737	-1.1469	6.24999	3.1e-08	1.5e-06	NA	NA	NA	NA	NA	NA	NA	NA	NA	NA	NA	NA	21.009	19.768	29.225	94.421	78.108	91.928	42.242	39.189	38.491	32.609	38.18	29.402	8.869	16.729	14.289	98.291	71.596	109.029	20.664	19.193	17.294	18.184	20.192	24.04
bmlnct_3960	NA	NA	NA	NA	-1.10283	6.03283	0.000115977	0.00370521	NA	NA	NA	NA	NA	NA	NA	NA	40.676	41.46	47.392	56.64	47.005	51.564	95.348	114.838	111.609	47.748	56.098	56.178	44.287	31.058	47.563	70.209	56.756	68.098	53.45	65.001	53.306	24.004	26.67	24.701
bmlnct_2486	1.67927	3.81584	0.00287303	0.0282343	NA	NA	NA	NA	NA	NA	NA	NA	NA	NA	NA	NA	7.527	11.082	10.819	6.64	10.423	6.933	14.886	5.968	17.711	15.444	20.179	11.219	0	7.347	11.299	8.174	0	0	40.459	54.647	38.349	17.568	0	0
bmlnct_4318	NA	NA	NA	NA	-2.52723	4.02795	0.00227411	0.0444419	NA	NA	NA	NA	NA	NA	NA	NA	0	0	0	0	0	0	0	0	0	41.73	47.828	50.722	0	0	0	0	0	0	10.872	0	0	0	0	20.198
bmlnct_4325	1.22924	8.52639	1.81e-11	1.59e-09	1.21805	10.7946	2.43e-16	6.87e-14	-1.45487	12.3951	2.33e-18	1.01e-15	NA	NA	NA	NA	813.231	888.339	1013.55	193.796	228.877	241.461	25.064	39.396	27.569	108.024	157.689	136.917	321.918	321.55	351	226.433	224.932	256.689	71.455	86.319	72.938	360.587	281.331	316.725
bmlnct_2261	-6.68268	3.31839	0.000219553	0.00331828	NA	NA	NA	NA	-7.93906	5.04168	2.81e-06	0.000180035	NA	NA	NA	NA	0	7.896	3.34	0	0	4.268	2.64	0	1.131	5.484	0.558	4.097	0	0	0	0	0	0	0	0	0	0	0	1.552
bmlnct_2762	NA	NA	NA	NA	NA	NA	NA	NA	-1.3107	5.95721	0.0005687	0.0195005	NA	NA	NA	NA	57.579	48.394	109.876	82.686	101.585	90.726	14.077	43.223	24.836	15.766	16.541	9.431	24.751	28.248	33.845	83.179	83.318	121.387	17.597	6.799	36.926	18.025	39.668	36.036
bmlnct_4465	NA	NA	NA	NA	-7.05664	4.55675	1.21e-06	6.36e-05	NA	NA	NA	NA	NA	NA	NA	NA	0	0	0	0	0	0	0	0	0	86.443	18.048	153.824	0	0	0	0	0	0	0	0	0	0	0	0
bmlnct_3662	1.29123	15.1408	1.09e-14	1.77e-12	NA	NA	NA	NA	NA	NA	NA	NA	NA	NA	NA	NA	606.609	548.367	511.486	2939.72	3264.81	3287.43	55476.1	41600.5	36465.5	6154.22	7339.19	6899.43	467.141	892.158	887.72	1464.52	1848.65	1541.93	109001	107123	131644	4143.41	4079.2	4232.29
bmlnct_0823	-1.50051	5.13609	4.44e-05	0.000850207	NA	NA	NA	NA	NA	NA	NA	NA	NA	NA	NA	NA	175.963	104.339	154.596	51.735	67.706	74.286	98.662	145.401	94.884	50.13	62.908	54.651	171.663	146.758	179.858	75.671	77.839	75.564	28.903	42.055	57.778	68.561	54.098	87.718
bmlnct_4343	-1.06598	6.01429	3.86e-06	9.81e-05	NA	NA	NA	NA	NA	NA	NA	NA	NA	NA	NA	NA	59.01	52.877	66.26	130.764	129.799	145.906	105.964	127.487	121.871	62.684	52.349	40.22	39.088	28.546	59.05	138.011	96.784	170.236	53.91	60.653	66.592	36.888	67.718	86.674
bmlnct_2260	1.21072	6.06323	0.0013848	0.0158062	1.65477	7.06908	3.19e-09	2.66e-07	3.13586	6.76106	0.00150374	0.0425731	NA	NA	NA	NA	3.83	0	0	7.364	9.009	15.739	1.91	5.14	1.49	2.45	6.912	3.138	5.493	12.958	15.525	6.794	9.738	12.622	6.568	6.657	7.74	14.158	11.924	14.564
bmlnct_4329	NA	NA	NA	NA	1.03349	10.6352	2.54e-05	0.000992464	-1.28679	12.7593	2.18e-11	3.13e-09	NA	NA	NA	NA	1237.6	1714.66	1670.21	165.719	182.212	147.96	229.679	295.26	221.997	243.927	166.993	125.698	718.518	641.756	542.753	255.115	193.335	217.276	407.618	385.192	372.385	319.822	295.825	510.75
