# Supplementary material for: Gene Expression Pattern and Regulatory Network of α-Toxin Treatment in Bombyx mori
Source: Int J Genomics. 2019 Mar 5;2019:7859121. doi: 10.1155/2019/7859121 (PMC6425383; doi:10.1155/2019/7859121)
Supplement: Supplementary 9 — Table 9: cliques within the blue and red module. [file 7859121.f9.xls]

## Sheet: Table 1
blue module					red module
cliques id	id	function			cliques_num	id	function
1	BGIBMGA007735	gi|357624813|gb|EHJ75445.1| ABC transporter family C protein ABCC2 [Danaus plexippus]			1	BGIBMGA008023	gi|332020498|gb|EGI60913.1| Putative protein disulfide-isomerase A4 [Acromyrmex echinatior]
1	BGIBMGA010111	gi|512927795|ref|XP_004931424.1| PREDICTED: pollen-specific leucine-rich repeat extensin-like protein 1-like [Bombyx mori]			1	BGIBMGA010112	gi|512927583|ref|XP_004931371.1| PREDICTED: probable serine/threonine-protein kinase kinX-like isoform X1 [Bombyx mori]
1	BGIBMGA005318	gi|512930978|ref|XP_004932194.1| PREDICTED: ras guanine nucleotide exchange factor L-like [Bombyx mori]			2	BGIBMGA001874	gi|153792203|ref|NP_001093281.1| vesicle amine transport protein [Bombyx mori] gi|95103100|gb|ABF51491.1| vesicle amine transport protein [Bombyx mori]
2	BGIBMGA007735	gi|357624813|gb|EHJ75445.1| ABC transporter family C protein ABCC2 [Danaus plexippus]			2	BGIBMGA003739	gi|168823421|ref|NP_001108344.1| facilitated trehalose transporter Tret1 [Bombyx mori] gi|300681184|sp|A9ZSY3.1|TRET1_BOMMO RecName: Full=Facilitated trehalose transporter Tret1; Short=BmTRET1 gi|164454395|dbj|BAF96744.1| trehalose transporter BmTRET1 [Bombyx mori]
2	BGIBMGA010235	gi|512927424|ref|XP_004931331.1| PREDICTED: LOW QUALITY PROTEIN: sarcalumenin-like [Bombyx mori]			2	BGIBMGA013421	gi|512895179|ref|XP_004923610.1| PREDICTED: nuclear factor interleukin-3-regulated protein-like [Bombyx mori]
2	BGIBMGA005318	gi|512930978|ref|XP_004932194.1| PREDICTED: ras guanine nucleotide exchange factor L-like [Bombyx mori]			3	BGIBMGA002549	gi|290563261|ref|NP_001166743.1| cuticular protein RR-1 motif 5 precursor [Bombyx mori] gi|223671111|tpd|FAA00507.1| TPA: putative cuticle protein [Bombyx mori]
3	BGIBMGA000613	gi|221327579|gb|ACM17460.1| miniparamyosin [Bombyx mori]			3	BGIBMGA009259	gi|512891154|ref|XP_004922635.1| PREDICTED: fibrohexamerin-like [Bombyx mori]
3	BGIBMGA009199	gi|512911768|ref|XP_004927493.1| PREDICTED: organic cation transporter protein-like [Bombyx mori]			3	BGIBMGA014055	gi|512912491|ref|XP_004927669.1| PREDICTED: facilitated trehalose transporter Tret1-2 homolog [Bombyx mori]
3	BGIBMGA000612	gi|531996938|gb|AGT62469.1| paramyosin, partial [Bicyclus anynana]			4	BGIBMGA011601	gi|512928590|ref|XP_004931615.1| PREDICTED: alanine--glyoxylate aminotransferase 2, mitochondrial-like [Bombyx mori]
4	BGIBMGA003458	gi|108872133|gb|EAT36358.1| AAEL011551-PA [Aedes aegypti]			4	BGIBMGA012587	gi|512906561|ref|XP_004926227.1| PREDICTED: solute carrier family 22 member 5-like [Bombyx mori]
4	BGIBMGA010544	gi|114051920|ref|NP_001040437.1| muscular protein 20 [Bombyx mori] gi|95102890|gb|ABF51386.1| muscular protein 20 [Bombyx mori]			4	BGIBMGA013729	gi|512907213|ref|XP_004926386.1| PREDICTED: proton myo-inositol cotransporter-like [Bombyx mori]
4	BGIBMGA014149	gi|512906413|ref|XP_004926190.1| PREDICTED: myrosinase 1-like [Bombyx mori]			5	BGIBMGA009106	gi|112983028|ref|NP_001037077.1| glutathione S-transferase sigma 1 [Bombyx mori] gi|31559115|gb|AAP50848.1| glutathione S-transferase 2 [Bombyx mori] gi|112361467|gb|ABI15775.1| glutathione S-transferase 2 [Bombyx mori]
4	BGIBMGA000896	gi|512913554|ref|XP_004927925.1| PREDICTED: zinc transporter 8-like [Bombyx mori]			5	BGIBMGA009874	gi|306518664|ref|NP_001182393.1| carboxyl/cholinesterase 7 precursor [Bombyx mori] gi|301069200|dbj|BAJ11979.1| carboxyl/cholinesterase 7 [Bombyx mori]
5	BGIBMGA013756	gi|171740881|gb|ACB54935.1| chitin deacetylase [Helicoverpa armigera]			5	bmlnct_3662	NA
5	BGIBMGA003835	gi|379698990|ref|NP_001243967.1| UDP-glycosyltransferase UGT41A3 precursor [Bombyx mori] gi|363896186|gb|AEW43177.1| UDP-glycosyltransferase UGT41A3 [Bombyx mori]			6	BGIBMGA001874	gi|153792203|ref|NP_001093281.1| vesicle amine transport protein [Bombyx mori] gi|95103100|gb|ABF51491.1| vesicle amine transport protein [Bombyx mori]
5	BGIBMGA004801	gi|512894416|ref|XP_004923425.1| PREDICTED: zinc carboxypeptidase-like [Bombyx mori]			6	BGIBMGA010240	gi|10119784|dbj|BAB13481.1| chitinase precursor [Bombyx mori]
5	BGIBMGA014149	gi|512906413|ref|XP_004926190.1| PREDICTED: myrosinase 1-like [Bombyx mori]			6	BGIBMGA012502	gi|512896938|ref|XP_004924031.1| PREDICTED: LOW QUALITY PROTEIN: putative sodium-dependent multivitamin transporter-like [Bombyx mori]
5	BGIBMGA003322	no hints			6	BGIBMGA014585	gi|474089078|gb|EMS54799.1| Histone H4 [Triticum urartu]
6	BGIBMGA006415	gi|112982938|ref|NP_001037099.1| chorion b-ZIP transcription factor [Bombyx mori] gi|54401523|gb|AAV34566.1| chorion b-ZIP transcription factor [Bombyx mori]			7	BGIBMGA001337	gi|379699038|ref|NP_001243993.1| UDP-glycosyltransferase UGT41A1 precursor [Bombyx mori] gi|363896182|gb|AEW43175.1| UDP-glycosyltransferase UGT41A1 [Bombyx mori]
6	BGIBMGA014226	gi|340718034|ref|XP_003397477.1| PREDICTED: myosin heavy chain, muscle-like isoform 2 [Bombus terrestris]			7	BGIBMGA003739	gi|168823421|ref|NP_001108344.1| facilitated trehalose transporter Tret1 [Bombyx mori] gi|300681184|sp|A9ZSY3.1|TRET1_BOMMO RecName: Full=Facilitated trehalose transporter Tret1; Short=BmTRET1 gi|164454395|dbj|BAF96744.1| trehalose transporter BmTRET1 [Bombyx mori]
6	BGIBMGA013416	gi|512895171|ref|XP_004923608.1| PREDICTED: filamin-A-like [Bombyx mori]			7	BGIBMGA007144	gi|195963353|ref|NP_001124349.1| 3-hydroxyisobutyrate dehydrogenase [Bombyx mori] gi|189345326|gb|ACD92999.1| 3-hydroxyisobutyrate dehydrogenase [Bombyx mori]
6	BGIBMGA012526	gi|512901813|ref|XP_004925227.1| PREDICTED: alanine--glyoxylate aminotransferase 2-like [Bombyx mori]			8	BGIBMGA001498	gi|512920408|ref|XP_004929625.1| PREDICTED: synaptic vesicle glycoprotein 2B-like isoform X1 [Bombyx mori] gi|512920412|ref|XP_004929626.1| PREDICTED: synaptic vesicle glycoprotein 2B-like isoform X2 [Bombyx mori]
6	BGIBMGA009977	gi|512907406|ref|XP_004926434.1| PREDICTED: PDZ and LIM domain protein 3-like isoform X3 [Bombyx mori]			8	BGIBMGA002565	gi|512931904|ref|XP_004932415.1| PREDICTED: uncharacterized protein LOC101746215 isoform X1 [Bombyx mori] gi|512931908|ref|XP_004932416.1| PREDICTED: uncharacterized protein LOC101746215 isoform X2 [Bombyx mori]
6	BGIBMGA007093	gi|512932383|ref|XP_004932532.1| PREDICTED: solute carrier family 25 member 38-like isoform X1 [Bombyx mori]			8	BGIBMGA002943	gi|512885771|ref|XP_004921651.1| PREDICTED: 15-hydroxyprostaglandin dehydrogenase [NAD(+)]-like [Bombyx mori]
7	BGIBMGA012399	gi|112983008|ref|NP_001037592.1| sorbitol dehydrogenase [Bombyx mori] gi|108860581|dbj|BAE95831.1| sorbitol dehydrogenase-2 [Bombyx mori]			8	SilkDB_TCONS_00253520	NA
7	BGIBMGA012864	gi|379698954|ref|NP_001243949.1| peptidoglycan recognition protein precursor [Bombyx mori] gi|355398229|gb|AER70118.1| peptidoglycan recognition protein [Bombyx mori]			9	BGIBMGA003014	gi|512925839|ref|XP_004930937.1| PREDICTED: cytochrome b5-like [Bombyx mori]
7	BGIBMGA004894	gi|389610783|dbj|BAM19002.1| fau protein [Papilio polytes]			9	BGIBMGA007240	gi|512909982|ref|XP_004927055.1| PREDICTED: glycine receptor subunit alpha-1-like [Bombyx mori]
7	BGIBMGA004893	gi|390178515|ref|XP_001359095.3| GA19674, isoform F [Drosophila pseudoobscura pseudoobscura] gi|388859475|gb|EAL28238.3| GA19674, isoform F [Drosophila pseudoobscura pseudoobscura]			9	BGIBMGA008110	no hints
7	BGIBMGA005789	gi|512896255|ref|XP_004923868.1| PREDICTED: transmembrane protein 205-like [Bombyx mori]			9	BGIBMGA009106	gi|112983028|ref|NP_001037077.1| glutathione S-transferase sigma 1 [Bombyx mori] gi|31559115|gb|AAP50848.1| glutathione S-transferase 2 [Bombyx mori] gi|112361467|gb|ABI15775.1| glutathione S-transferase 2 [Bombyx mori]
7	BGIBMGA001277	gi|512914289|ref|XP_004928105.1| PREDICTED: cytochrome P450 CYP12A2-like [Bombyx mori]			9	bmlnct_3662	NA
7	BGIBMGA006971	gi|512932611|ref|XP_004932588.1| PREDICTED: LOW QUALITY PROTEIN: estrogen sulfotransferase-like [Bombyx mori]			10	BGIBMGA005950	gi|512919431|ref|XP_004929380.1| PREDICTED: putative leucine-rich repeat-containing protein DDB_G0290503-like [Bombyx mori]
7	BGIBMGA003682	gi|585087537|gb|AHJ26004.1| YKI3, partial [Bombyx mori]			10	BGIBMGA007756	gi|512915784|ref|XP_004928474.1| PREDICTED: RE1-silencing transcription factor-like [Bombyx mori]
8	BGIBMGA004865	gi|112983654|ref|NP_001036872.1| Bombyrin precursor [Bombyx mori]			10	BGIBMGA012460	gi|512896982|ref|XP_004924041.1| PREDICTED: uncharacterized protein LOC101745027 isoform X2 [Bombyx mori]
8	BGIBMGA005024	gi|160425399|gb|ABX39543.1| single domain major allergen protein [Gonepteryx rhamni]			11	BGIBMGA005950	gi|512919431|ref|XP_004929380.1| PREDICTED: putative leucine-rich repeat-containing protein DDB_G0290503-like [Bombyx mori]
8	BGIBMGA000736	gi|389609045|dbj|BAM18134.1| unknown unsecreted protein [Papilio xuthus]			11	BGIBMGA007756	gi|512915784|ref|XP_004928474.1| PREDICTED: RE1-silencing transcription factor-like [Bombyx mori]
8	BGIBMGA009476	gi|512891971|ref|XP_004922815.1| PREDICTED: carboxypeptidase A2-like [Bombyx mori]			11	BGIBMGA008023	gi|332020498|gb|EGI60913.1| Putative protein disulfide-isomerase A4 [Acromyrmex echinatior]
8	BGIBMGA013578	gi|512902156|ref|XP_004925306.1| PREDICTED: putative carbonic anhydrase 5-like [Bombyx mori]			11	BGIBMGA010913	gi|290543468|ref|NP_001166291.1| cuticular protein RR-3 motif 148 precursor [Bombyx mori] gi|223671398|tpd|FAA00651.1| TPA: putative cuticle protein [Bombyx mori]
8	BGIBMGA010329	gi|512907828|ref|XP_004926539.1| PREDICTED: LOW QUALITY PROTEIN: esterase B1-like [Bombyx mori]			11	BGIBMGA014052	gi|512912628|ref|XP_004927704.1| PREDICTED: major facilitator superfamily domain-containing protein 6-B-like [Bombyx mori]
8	BGIBMGA013638	gi|512907994|ref|XP_004926573.1| PREDICTED: synaptic vesicle 2-related protein-like [Bombyx mori]			12	BGIBMGA000504	gi|91079538|ref|XP_970846.1| PREDICTED: similar to ZK899.2 [Tribolium castaneum]
8	BGIBMGA008514	gi|512915582|ref|XP_004928424.1| PREDICTED: transmembrane protease serine 9-like [Bombyx mori]			12	BGIBMGA005950	gi|512919431|ref|XP_004929380.1| PREDICTED: putative leucine-rich repeat-containing protein DDB_G0290503-like [Bombyx mori]
8	BGIBMGA014298	no hints			12	BGIBMGA007319	gi|512912184|ref|XP_004927594.1| PREDICTED: mitochondrial uncoupling protein 4-like isoform X1 [Bombyx mori]
9	BGIBMGA007524	gi|158288521|ref|XP_310395.6| AGAP003834-PA [Anopheles gambiae str. PEST] gi|157019122|gb|EAA05949.4| AGAP003834-PA [Anopheles gambiae str. PEST]			12	BGIBMGA012460	gi|512896982|ref|XP_004924041.1| PREDICTED: uncharacterized protein LOC101745027 isoform X2 [Bombyx mori]
9	BGIBMGA013238	gi|160358391|ref|NP_001104006.1| cytochrome P450 CYP6AE7 [Bombyx mori] gi|126583448|gb|ABO21682.1| CYP6AE family cytochrome P450 CYP6AE7 [Bombyx mori]			13	BGIBMGA000725	gi|512921632|ref|XP_004929924.1| PREDICTED: multidrug resistance protein homolog 49-like [Bombyx mori]
9	BGIBMGA004955	gi|226342886|ref|NP_001139705.1| serine protease inhibitor 13 precursor [Bombyx mori] gi|195972028|gb|ACG61176.1| serpin-13 [Bombyx mori]			13	BGIBMGA002002	gi|512933657|ref|XP_004932845.1| PREDICTED: calcium-binding mitochondrial carrier protein SCaMC-2-like isoform X2 [Bombyx mori]
9	BGIBMGA006366	gi|389615188|dbj|BAM20581.1| unknown unsecreted protein [Papilio polytes]			13	BGIBMGA002404	gi|512927097|ref|XP_004931249.1| PREDICTED: cytosolic carboxypeptidase-like protein 5-like [Bombyx mori]
9	BGIBMGA001146	gi|512913057|ref|XP_004927807.1| PREDICTED: monocarboxylate transporter 7-like [Bombyx mori]			13	BGIBMGA007541	gi|512899342|ref|XP_004924620.1| PREDICTED: serine/arginine repetitive matrix protein 2-like [Bombyx mori]
9	BGIBMGA000496	gi|512921949|ref|XP_004929999.1| PREDICTED: peptide transporter family 1-like [Bombyx mori]			13	BGIBMGA010913	gi|290543468|ref|NP_001166291.1| cuticular protein RR-3 motif 148 precursor [Bombyx mori] gi|223671398|tpd|FAA00651.1| TPA: putative cuticle protein [Bombyx mori]
9	BGIBMGA012081	gi|512934188|ref|XP_004932973.1| PREDICTED: TBC1 domain family member 12-like [Bombyx mori]			13	BGIBMGA012137	gi|512901561|ref|XP_004925165.1| PREDICTED: major facilitator superfamily domain-containing protein 6-like [Bombyx mori]
9	BGIBMGA007987	gi|584596300|gb|AHJ11178.1| peptidoglycan recognition protein S2 [Bombyx mori]			13	BGIBMGA014052	gi|512912628|ref|XP_004927704.1| PREDICTED: major facilitator superfamily domain-containing protein 6-B-like [Bombyx mori]
9	AK384617	NA			14	BGIBMGA000336	gi|290563241|ref|NP_001166717.1| cuticular protein RR-1 motif 34 precursor [Bombyx mori] gi|223671170|tpd|FAA00537.1| TPA: putative cuticle protein [Bombyx mori]
10	BGIBMGA001587	gi|114052020|ref|NP_001040445.1| tropomyosin-1 [Bombyx mori] gi|121958906|sp|Q1HPU0.1|TPM1_BOMMO RecName: Full=Tropomyosin-1 gi|95102920|gb|ABF51401.1| tropomyosin 1 [Bombyx mori]			14	BGIBMGA000504	gi|91079538|ref|XP_970846.1| PREDICTED: similar to ZK899.2 [Tribolium castaneum]
10	BGIBMGA014227	gi|158299190|ref|XP_319309.3| AGAP010147-PA [Anopheles gambiae str. PEST] gi|157014247|gb|EAA43613.3| AGAP010147-PA [Anopheles gambiae str. PEST]			14	BGIBMGA000725	gi|512921632|ref|XP_004929924.1| PREDICTED: multidrug resistance protein homolog 49-like [Bombyx mori]
10	BGIBMGA013238	gi|160358391|ref|NP_001104006.1| cytochrome P450 CYP6AE7 [Bombyx mori] gi|126583448|gb|ABO21682.1| CYP6AE family cytochrome P450 CYP6AE7 [Bombyx mori]			14	BGIBMGA002404	gi|512927097|ref|XP_004931249.1| PREDICTED: cytosolic carboxypeptidase-like protein 5-like [Bombyx mori]
10	BGIBMGA004955	gi|226342886|ref|NP_001139705.1| serine protease inhibitor 13 precursor [Bombyx mori] gi|195972028|gb|ACG61176.1| serpin-13 [Bombyx mori]			14	BGIBMGA007541	gi|512899342|ref|XP_004924620.1| PREDICTED: serine/arginine repetitive matrix protein 2-like [Bombyx mori]
10	BGIBMGA003894	gi|383858593|ref|XP_003704785.1| PREDICTED: proton-coupled amino acid transporter 1-like [Megachile rotundata]			14	BGIBMGA010913	gi|290543468|ref|NP_001166291.1| cuticular protein RR-3 motif 148 precursor [Bombyx mori] gi|223671398|tpd|FAA00651.1| TPA: putative cuticle protein [Bombyx mori]
10	BGIBMGA006366	gi|389615188|dbj|BAM20581.1| unknown unsecreted protein [Papilio polytes]			14	BGIBMGA012137	gi|512901561|ref|XP_004925165.1| PREDICTED: major facilitator superfamily domain-containing protein 6-like [Bombyx mori]
10	BGIBMGA007546	gi|512899311|ref|XP_004924612.1| PREDICTED: esterase FE4-like [Bombyx mori]			14	BGIBMGA014052	gi|512912628|ref|XP_004927704.1| PREDICTED: major facilitator superfamily domain-containing protein 6-B-like [Bombyx mori]
10	BGIBMGA001146	gi|512913057|ref|XP_004927807.1| PREDICTED: monocarboxylate transporter 7-like [Bombyx mori]			15	BGIBMGA000725	gi|512921632|ref|XP_004929924.1| PREDICTED: multidrug resistance protein homolog 49-like [Bombyx mori]
10	BGIBMGA000496	gi|512921949|ref|XP_004929999.1| PREDICTED: peptide transporter family 1-like [Bombyx mori]			15	BGIBMGA002002	gi|512933657|ref|XP_004932845.1| PREDICTED: calcium-binding mitochondrial carrier protein SCaMC-2-like isoform X2 [Bombyx mori]
10	BGIBMGA011774	gi|512927984|ref|XP_004931470.1| PREDICTED: purine nucleoside phosphorylase-like isoform X2 [Bombyx mori]			15	BGIBMGA002404	gi|512927097|ref|XP_004931249.1| PREDICTED: cytosolic carboxypeptidase-like protein 5-like [Bombyx mori]
10	BGIBMGA007987	gi|584596300|gb|AHJ11178.1| peptidoglycan recognition protein S2 [Bombyx mori]			15	BGIBMGA008023	gi|332020498|gb|EGI60913.1| Putative protein disulfide-isomerase A4 [Acromyrmex echinatior]
11	BGIBMGA014227	gi|158299190|ref|XP_319309.3| AGAP010147-PA [Anopheles gambiae str. PEST] gi|157014247|gb|EAA43613.3| AGAP010147-PA [Anopheles gambiae str. PEST]			15	BGIBMGA010913	gi|290543468|ref|NP_001166291.1| cuticular protein RR-3 motif 148 precursor [Bombyx mori] gi|223671398|tpd|FAA00651.1| TPA: putative cuticle protein [Bombyx mori]
11	BGIBMGA013238	gi|160358391|ref|NP_001104006.1| cytochrome P450 CYP6AE7 [Bombyx mori] gi|126583448|gb|ABO21682.1| CYP6AE family cytochrome P450 CYP6AE7 [Bombyx mori]			15	BGIBMGA012137	gi|512901561|ref|XP_004925165.1| PREDICTED: major facilitator superfamily domain-containing protein 6-like [Bombyx mori]
11	BGIBMGA004955	gi|226342886|ref|NP_001139705.1| serine protease inhibitor 13 precursor [Bombyx mori] gi|195972028|gb|ACG61176.1| serpin-13 [Bombyx mori]			15	BGIBMGA014052	gi|512912628|ref|XP_004927704.1| PREDICTED: major facilitator superfamily domain-containing protein 6-B-like [Bombyx mori]
11	BGIBMGA003894	gi|383858593|ref|XP_003704785.1| PREDICTED: proton-coupled amino acid transporter 1-like [Megachile rotundata]			16	BGIBMGA000330	gi|224177574|ref|NP_001128676.2| cuticular protein glycine-rich 21 precursor [Bombyx mori] gi|224038239|gb|ACH78251.2| epidermal protein [Bombyx mori]
11	BGIBMGA006366	gi|389615188|dbj|BAM20581.1| unknown unsecreted protein [Papilio polytes]			16	BGIBMGA003014	gi|512925839|ref|XP_004930937.1| PREDICTED: cytochrome b5-like [Bombyx mori]
11	BGIBMGA001146	gi|512913057|ref|XP_004927807.1| PREDICTED: monocarboxylate transporter 7-like [Bombyx mori]			16	BGIBMGA005278	gi|290563263|ref|NP_001166744.1| cuticular protein RR-1 motif 3 precursor [Bombyx mori] gi|223671107|tpd|FAA00505.1| TPA: putative cuticle protein [Bombyx mori]
11	BGIBMGA000496	gi|512921949|ref|XP_004929999.1| PREDICTED: peptide transporter family 1-like [Bombyx mori]			16	BGIBMGA007558	gi|512899354|ref|XP_004924623.1| PREDICTED: inter-alpha-trypsin inhibitor heavy chain H4-like [Bombyx mori]
11	BGIBMGA011774	gi|512927984|ref|XP_004931470.1| PREDICTED: purine nucleoside phosphorylase-like isoform X2 [Bombyx mori]			16	BGIBMGA008110	no hints
11	BGIBMGA012081	gi|512934188|ref|XP_004932973.1| PREDICTED: TBC1 domain family member 12-like [Bombyx mori]			16	BGIBMGA009106	gi|112983028|ref|NP_001037077.1| glutathione S-transferase sigma 1 [Bombyx mori] gi|31559115|gb|AAP50848.1| glutathione S-transferase 2 [Bombyx mori] gi|112361467|gb|ABI15775.1| glutathione S-transferase 2 [Bombyx mori]
11	BGIBMGA007987	gi|584596300|gb|AHJ11178.1| peptidoglycan recognition protein S2 [Bombyx mori]			16	BGIBMGA010933	gi|512899849|ref|XP_004924748.1| PREDICTED: proton-coupled folate transporter-like [Bombyx mori]
12	BGIBMGA001587	gi|114052020|ref|NP_001040445.1| tropomyosin-1 [Bombyx mori] gi|121958906|sp|Q1HPU0.1|TPM1_BOMMO RecName: Full=Tropomyosin-1 gi|95102920|gb|ABF51401.1| tropomyosin 1 [Bombyx mori]			16	BGIBMGA014246	gi|512902421|ref|XP_004925372.1| PREDICTED: putative inorganic phosphate cotransporter-like [Bombyx mori]
12	BGIBMGA014227	gi|158299190|ref|XP_319309.3| AGAP010147-PA [Anopheles gambiae str. PEST] gi|157014247|gb|EAA43613.3| AGAP010147-PA [Anopheles gambiae str. PEST]			16	BGIBMGA014285	gi|112984270|ref|NP_001037462.1| cecropin-A precursor [Bombyx mori] gi|512938251|ref|XP_004933962.1| PREDICTED: cecropin-A-like [Bombyx mori] gi|2493573|sp|Q27239.1|CECA_BOMMO RecName: Full=Cecropin-A; Flags: Precursor gi|765344|gb|AAC60515.1| cecropin A [Bombyx mori] gi|1220101|dbj|BAA04217.1| preprocecropin A [Bombyx mori] gi|2970030|dbj|BAA25178.1| cecropin A [Bombyx mori] gi|2970032|dbj|BAA25…
12	BGIBMGA013238	gi|160358391|ref|NP_001104006.1| cytochrome P450 CYP6AE7 [Bombyx mori] gi|126583448|gb|ABO21682.1| CYP6AE family cytochrome P450 CYP6AE7 [Bombyx mori]			17	BGIBMGA000336	gi|290563241|ref|NP_001166717.1| cuticular protein RR-1 motif 34 precursor [Bombyx mori] gi|223671170|tpd|FAA00537.1| TPA: putative cuticle protein [Bombyx mori]
12	BGIBMGA004955	gi|226342886|ref|NP_001139705.1| serine protease inhibitor 13 precursor [Bombyx mori] gi|195972028|gb|ACG61176.1| serpin-13 [Bombyx mori]			17	BGIBMGA000504	gi|91079538|ref|XP_970846.1| PREDICTED: similar to ZK899.2 [Tribolium castaneum]
12	BGIBMGA006366	gi|389615188|dbj|BAM20581.1| unknown unsecreted protein [Papilio polytes]			17	BGIBMGA000725	gi|512921632|ref|XP_004929924.1| PREDICTED: multidrug resistance protein homolog 49-like [Bombyx mori]
12	BGIBMGA007546	gi|512899311|ref|XP_004924612.1| PREDICTED: esterase FE4-like [Bombyx mori]			17	BGIBMGA002404	gi|512927097|ref|XP_004931249.1| PREDICTED: cytosolic carboxypeptidase-like protein 5-like [Bombyx mori]
12	BGIBMGA001146	gi|512913057|ref|XP_004927807.1| PREDICTED: monocarboxylate transporter 7-like [Bombyx mori]			17	BGIBMGA005950	gi|512919431|ref|XP_004929380.1| PREDICTED: putative leucine-rich repeat-containing protein DDB_G0290503-like [Bombyx mori]
12	BGIBMGA000496	gi|512921949|ref|XP_004929999.1| PREDICTED: peptide transporter family 1-like [Bombyx mori]			17	BGIBMGA008023	gi|332020498|gb|EGI60913.1| Putative protein disulfide-isomerase A4 [Acromyrmex echinatior]
12	BGIBMGA003129	gi|512925715|ref|XP_004930906.1| PREDICTED: clavesin-1-like [Bombyx mori]			17	BGIBMGA010913	gi|290543468|ref|NP_001166291.1| cuticular protein RR-3 motif 148 precursor [Bombyx mori] gi|223671398|tpd|FAA00651.1| TPA: putative cuticle protein [Bombyx mori]
12	BGIBMGA011774	gi|512927984|ref|XP_004931470.1| PREDICTED: purine nucleoside phosphorylase-like isoform X2 [Bombyx mori]			17	BGIBMGA012137	gi|512901561|ref|XP_004925165.1| PREDICTED: major facilitator superfamily domain-containing protein 6-like [Bombyx mori]
12	BGIBMGA007987	gi|584596300|gb|AHJ11178.1| peptidoglycan recognition protein S2 [Bombyx mori]			17	BGIBMGA014052	gi|512912628|ref|XP_004927704.1| PREDICTED: major facilitator superfamily domain-containing protein 6-B-like [Bombyx mori]
13	BGIBMGA014227	gi|158299190|ref|XP_319309.3| AGAP010147-PA [Anopheles gambiae str. PEST] gi|157014247|gb|EAA43613.3| AGAP010147-PA [Anopheles gambiae str. PEST]			18	BGIBMGA000330	gi|224177574|ref|NP_001128676.2| cuticular protein glycine-rich 21 precursor [Bombyx mori] gi|224038239|gb|ACH78251.2| epidermal protein [Bombyx mori]
13	BGIBMGA013238	gi|160358391|ref|NP_001104006.1| cytochrome P450 CYP6AE7 [Bombyx mori] gi|126583448|gb|ABO21682.1| CYP6AE family cytochrome P450 CYP6AE7 [Bombyx mori]			18	BGIBMGA003014	gi|512925839|ref|XP_004930937.1| PREDICTED: cytochrome b5-like [Bombyx mori]
13	BGIBMGA004955	gi|226342886|ref|NP_001139705.1| serine protease inhibitor 13 precursor [Bombyx mori] gi|195972028|gb|ACG61176.1| serpin-13 [Bombyx mori]			18	BGIBMGA005278	gi|290563263|ref|NP_001166744.1| cuticular protein RR-1 motif 3 precursor [Bombyx mori] gi|223671107|tpd|FAA00505.1| TPA: putative cuticle protein [Bombyx mori]
13	BGIBMGA006366	gi|389615188|dbj|BAM20581.1| unknown unsecreted protein [Papilio polytes]			18	BGIBMGA007067	gi|242010303|ref|XP_002425908.1| beat protein, putative [Pediculus humanus corporis] gi|212509884|gb|EEB13170.1| beat protein, putative [Pediculus humanus corporis]
13	BGIBMGA001146	gi|512913057|ref|XP_004927807.1| PREDICTED: monocarboxylate transporter 7-like [Bombyx mori]			18	BGIBMGA007558	gi|512899354|ref|XP_004924623.1| PREDICTED: inter-alpha-trypsin inhibitor heavy chain H4-like [Bombyx mori]
13	BGIBMGA000496	gi|512921949|ref|XP_004929999.1| PREDICTED: peptide transporter family 1-like [Bombyx mori]			18	BGIBMGA008110	no hints
13	BGIBMGA003129	gi|512925715|ref|XP_004930906.1| PREDICTED: clavesin-1-like [Bombyx mori]			18	BGIBMGA010933	gi|512899849|ref|XP_004924748.1| PREDICTED: proton-coupled folate transporter-like [Bombyx mori]
13	BGIBMGA011774	gi|512927984|ref|XP_004931470.1| PREDICTED: purine nucleoside phosphorylase-like isoform X2 [Bombyx mori]			18	BGIBMGA010938	gi|512899829|ref|XP_004924743.1| PREDICTED: solute carrier family 46 member 3-like [Bombyx mori]
13	BGIBMGA012081	gi|512934188|ref|XP_004932973.1| PREDICTED: TBC1 domain family member 12-like [Bombyx mori]			18	BGIBMGA014246	gi|512902421|ref|XP_004925372.1| PREDICTED: putative inorganic phosphate cotransporter-like [Bombyx mori]
13	BGIBMGA007987	gi|584596300|gb|AHJ11178.1| peptidoglycan recognition protein S2 [Bombyx mori]			18	BGIBMGA014285	gi|112984270|ref|NP_001037462.1| cecropin-A precursor [Bombyx mori] gi|512938251|ref|XP_004933962.1| PREDICTED: cecropin-A-like [Bombyx mori] gi|2493573|sp|Q27239.1|CECA_BOMMO RecName: Full=Cecropin-A; Flags: Precursor gi|765344|gb|AAC60515.1| cecropin A [Bombyx mori] gi|1220101|dbj|BAA04217.1| preprocecropin A [Bombyx mori] gi|2970030|dbj|BAA25178.1| cecropin A [Bombyx mori] gi|2970032|dbj|BAA25…
14	BGIBMGA007524	gi|158288521|ref|XP_310395.6| AGAP003834-PA [Anopheles gambiae str. PEST] gi|157019122|gb|EAA05949.4| AGAP003834-PA [Anopheles gambiae str. PEST]			19	BGIBMGA000330	gi|224177574|ref|NP_001128676.2| cuticular protein glycine-rich 21 precursor [Bombyx mori] gi|224038239|gb|ACH78251.2| epidermal protein [Bombyx mori]
14	BGIBMGA013238	gi|160358391|ref|NP_001104006.1| cytochrome P450 CYP6AE7 [Bombyx mori] gi|126583448|gb|ABO21682.1| CYP6AE family cytochrome P450 CYP6AE7 [Bombyx mori]			19	BGIBMGA000338	gi|290563462|ref|NP_001166719.1| cuticular protein RR-1 motif 32 precursor [Bombyx mori] gi|223671166|tpd|FAA00535.1| TPA: putative cuticle protein [Bombyx mori]
14	BGIBMGA004955	gi|226342886|ref|NP_001139705.1| serine protease inhibitor 13 precursor [Bombyx mori] gi|195972028|gb|ACG61176.1| serpin-13 [Bombyx mori]			19	BGIBMGA005278	gi|290563263|ref|NP_001166744.1| cuticular protein RR-1 motif 3 precursor [Bombyx mori] gi|223671107|tpd|FAA00505.1| TPA: putative cuticle protein [Bombyx mori]
14	BGIBMGA006366	gi|389615188|dbj|BAM20581.1| unknown unsecreted protein [Papilio polytes]			19	BGIBMGA007067	gi|242010303|ref|XP_002425908.1| beat protein, putative [Pediculus humanus corporis] gi|212509884|gb|EEB13170.1| beat protein, putative [Pediculus humanus corporis]
14	BGIBMGA001146	gi|512913057|ref|XP_004927807.1| PREDICTED: monocarboxylate transporter 7-like [Bombyx mori]			19	BGIBMGA007558	gi|512899354|ref|XP_004924623.1| PREDICTED: inter-alpha-trypsin inhibitor heavy chain H4-like [Bombyx mori]
14	BGIBMGA000496	gi|512921949|ref|XP_004929999.1| PREDICTED: peptide transporter family 1-like [Bombyx mori]			19	BGIBMGA010933	gi|512899849|ref|XP_004924748.1| PREDICTED: proton-coupled folate transporter-like [Bombyx mori]
14	BGIBMGA003129	gi|512925715|ref|XP_004930906.1| PREDICTED: clavesin-1-like [Bombyx mori]			19	BGIBMGA010938	gi|512899829|ref|XP_004924743.1| PREDICTED: solute carrier family 46 member 3-like [Bombyx mori]
14	BGIBMGA011774	gi|512927984|ref|XP_004931470.1| PREDICTED: purine nucleoside phosphorylase-like isoform X2 [Bombyx mori]			19	BGIBMGA013831	gi|379698966|ref|NP_001243955.1| UDP-glycosyltransferase UGT33D2 precursor [Bombyx mori] gi|363896124|gb|AEW43146.1| UDP-glycosyltransferase UGT33D2 [Bombyx mori]
14	BGIBMGA002692	gi|512932034|ref|XP_004932446.1| PREDICTED: guanine nucleotide exchange factor DBS-like [Bombyx mori]			19	BGIBMGA014246	gi|512902421|ref|XP_004925372.1| PREDICTED: putative inorganic phosphate cotransporter-like [Bombyx mori]
14	BGIBMGA012081	gi|512934188|ref|XP_004932973.1| PREDICTED: TBC1 domain family member 12-like [Bombyx mori]			19	BGIBMGA014257	gi|512902513|ref|XP_004925393.1| PREDICTED: putative inorganic phosphate cotransporter-like [Bombyx mori]
14	BGIBMGA007987	gi|584596300|gb|AHJ11178.1| peptidoglycan recognition protein S2 [Bombyx mori]			19	BGIBMGA014285	gi|112984270|ref|NP_001037462.1| cecropin-A precursor [Bombyx mori] gi|512938251|ref|XP_004933962.1| PREDICTED: cecropin-A-like [Bombyx mori] gi|2493573|sp|Q27239.1|CECA_BOMMO RecName: Full=Cecropin-A; Flags: Precursor gi|765344|gb|AAC60515.1| cecropin A [Bombyx mori] gi|1220101|dbj|BAA04217.1| preprocecropin A [Bombyx mori] gi|2970030|dbj|BAA25178.1| cecropin A [Bombyx mori] gi|2970032|dbj|BAA25…
15	BGIBMGA002721	gi|112983202|ref|NP_001037019.1| putative deoxynucleoside kinase [Bombyx mori] gi|13506751|gb|AAK28318.1|AF226281_1 putative deoxynucleoside kinase [Bombyx mori]			19	bmlnct_2507	NA
15	BGIBMGA001587	gi|114052020|ref|NP_001040445.1| tropomyosin-1 [Bombyx mori] gi|121958906|sp|Q1HPU0.1|TPM1_BOMMO RecName: Full=Tropomyosin-1 gi|95102920|gb|ABF51401.1| tropomyosin 1 [Bombyx mori]			20	BGIBMGA000336	gi|290563241|ref|NP_001166717.1| cuticular protein RR-1 motif 34 precursor [Bombyx mori] gi|223671170|tpd|FAA00537.1| TPA: putative cuticle protein [Bombyx mori]
15	BGIBMGA014227	gi|158299190|ref|XP_319309.3| AGAP010147-PA [Anopheles gambiae str. PEST] gi|157014247|gb|EAA43613.3| AGAP010147-PA [Anopheles gambiae str. PEST]			20	BGIBMGA000504	gi|91079538|ref|XP_970846.1| PREDICTED: similar to ZK899.2 [Tribolium castaneum]
15	BGIBMGA013238	gi|160358391|ref|NP_001104006.1| cytochrome P450 CYP6AE7 [Bombyx mori] gi|126583448|gb|ABO21682.1| CYP6AE family cytochrome P450 CYP6AE7 [Bombyx mori]			20	BGIBMGA000725	gi|512921632|ref|XP_004929924.1| PREDICTED: multidrug resistance protein homolog 49-like [Bombyx mori]
15	BGIBMGA004955	gi|226342886|ref|NP_001139705.1| serine protease inhibitor 13 precursor [Bombyx mori] gi|195972028|gb|ACG61176.1| serpin-13 [Bombyx mori]			20	BGIBMGA001092	gi|108869666|gb|EAT33891.1| AAEL013840-PA [Aedes aegypti]
15	BGIBMGA006937	gi|357625725|gb|EHJ76074.1| troponin C [Danaus plexippus]			20	BGIBMGA002404	gi|512927097|ref|XP_004931249.1| PREDICTED: cytosolic carboxypeptidase-like protein 5-like [Bombyx mori]
15	BGIBMGA003894	gi|383858593|ref|XP_003704785.1| PREDICTED: proton-coupled amino acid transporter 1-like [Megachile rotundata]			20	BGIBMGA005582	gi|379698900|ref|NP_001243921.1| SOCS2-12 protein [Bombyx mori] gi|326632043|gb|ADZ99024.1| SOCS2-12 [Bombyx mori]
15	BGIBMGA007546	gi|512899311|ref|XP_004924612.1| PREDICTED: esterase FE4-like [Bombyx mori]			20	BGIBMGA010913	gi|290543468|ref|NP_001166291.1| cuticular protein RR-3 motif 148 precursor [Bombyx mori] gi|223671398|tpd|FAA00651.1| TPA: putative cuticle protein [Bombyx mori]
15	BGIBMGA001146	gi|512913057|ref|XP_004927807.1| PREDICTED: monocarboxylate transporter 7-like [Bombyx mori]			20	BGIBMGA011834	gi|114051463|ref|NP_001040364.1| methionine sulfoxide reductase [Bombyx mori] gi|95102640|gb|ABF51258.1| methionine sulfoxide reductase [Bombyx mori]
15	BGIBMGA011774	gi|512927984|ref|XP_004931470.1| PREDICTED: purine nucleoside phosphorylase-like isoform X2 [Bombyx mori]			20	BGIBMGA012137	gi|512901561|ref|XP_004925165.1| PREDICTED: major facilitator superfamily domain-containing protein 6-like [Bombyx mori]
16	BGIBMGA001587	gi|114052020|ref|NP_001040445.1| tropomyosin-1 [Bombyx mori] gi|121958906|sp|Q1HPU0.1|TPM1_BOMMO RecName: Full=Tropomyosin-1 gi|95102920|gb|ABF51401.1| tropomyosin 1 [Bombyx mori]			20	BGIBMGA012887	gi|512917329|ref|XP_004928861.1| PREDICTED: alpha-tocopherol transfer protein-like [Bombyx mori]
16	BGIBMGA014227	gi|158299190|ref|XP_319309.3| AGAP010147-PA [Anopheles gambiae str. PEST] gi|157014247|gb|EAA43613.3| AGAP010147-PA [Anopheles gambiae str. PEST]			20	BGIBMGA014052	gi|512912628|ref|XP_004927704.1| PREDICTED: major facilitator superfamily domain-containing protein 6-B-like [Bombyx mori]
16	BGIBMGA013238	gi|160358391|ref|NP_001104006.1| cytochrome P450 CYP6AE7 [Bombyx mori] gi|126583448|gb|ABO21682.1| CYP6AE family cytochrome P450 CYP6AE7 [Bombyx mori]			21	BGIBMGA000336	gi|290563241|ref|NP_001166717.1| cuticular protein RR-1 motif 34 precursor [Bombyx mori] gi|223671170|tpd|FAA00537.1| TPA: putative cuticle protein [Bombyx mori]
16	BGIBMGA004955	gi|226342886|ref|NP_001139705.1| serine protease inhibitor 13 precursor [Bombyx mori] gi|195972028|gb|ACG61176.1| serpin-13 [Bombyx mori]			21	BGIBMGA000504	gi|91079538|ref|XP_970846.1| PREDICTED: similar to ZK899.2 [Tribolium castaneum]
16	BGIBMGA006937	gi|357625725|gb|EHJ76074.1| troponin C [Danaus plexippus]			21	BGIBMGA000725	gi|512921632|ref|XP_004929924.1| PREDICTED: multidrug resistance protein homolog 49-like [Bombyx mori]
16	BGIBMGA003894	gi|383858593|ref|XP_003704785.1| PREDICTED: proton-coupled amino acid transporter 1-like [Megachile rotundata]			21	BGIBMGA001092	gi|108869666|gb|EAT33891.1| AAEL013840-PA [Aedes aegypti]
16	BGIBMGA006366	gi|389615188|dbj|BAM20581.1| unknown unsecreted protein [Papilio polytes]			21	BGIBMGA002404	gi|512927097|ref|XP_004931249.1| PREDICTED: cytosolic carboxypeptidase-like protein 5-like [Bombyx mori]
16	BGIBMGA007546	gi|512899311|ref|XP_004924612.1| PREDICTED: esterase FE4-like [Bombyx mori]			21	BGIBMGA005950	gi|512919431|ref|XP_004929380.1| PREDICTED: putative leucine-rich repeat-containing protein DDB_G0290503-like [Bombyx mori]
16	BGIBMGA001146	gi|512913057|ref|XP_004927807.1| PREDICTED: monocarboxylate transporter 7-like [Bombyx mori]			21	BGIBMGA010913	gi|290543468|ref|NP_001166291.1| cuticular protein RR-3 motif 148 precursor [Bombyx mori] gi|223671398|tpd|FAA00651.1| TPA: putative cuticle protein [Bombyx mori]
16	BGIBMGA011774	gi|512927984|ref|XP_004931470.1| PREDICTED: purine nucleoside phosphorylase-like isoform X2 [Bombyx mori]			21	BGIBMGA011834	gi|114051463|ref|NP_001040364.1| methionine sulfoxide reductase [Bombyx mori] gi|95102640|gb|ABF51258.1| methionine sulfoxide reductase [Bombyx mori]
17	BGIBMGA002721	gi|112983202|ref|NP_001037019.1| putative deoxynucleoside kinase [Bombyx mori] gi|13506751|gb|AAK28318.1|AF226281_1 putative deoxynucleoside kinase [Bombyx mori]			21	BGIBMGA012137	gi|512901561|ref|XP_004925165.1| PREDICTED: major facilitator superfamily domain-containing protein 6-like [Bombyx mori]
17	BGIBMGA001587	gi|114052020|ref|NP_001040445.1| tropomyosin-1 [Bombyx mori] gi|121958906|sp|Q1HPU0.1|TPM1_BOMMO RecName: Full=Tropomyosin-1 gi|95102920|gb|ABF51401.1| tropomyosin 1 [Bombyx mori]			21	BGIBMGA014052	gi|512912628|ref|XP_004927704.1| PREDICTED: major facilitator superfamily domain-containing protein 6-B-like [Bombyx mori]
17	BGIBMGA014227	gi|158299190|ref|XP_319309.3| AGAP010147-PA [Anopheles gambiae str. PEST] gi|157014247|gb|EAA43613.3| AGAP010147-PA [Anopheles gambiae str. PEST]			22	BGIBMGA000330	gi|224177574|ref|NP_001128676.2| cuticular protein glycine-rich 21 precursor [Bombyx mori] gi|224038239|gb|ACH78251.2| epidermal protein [Bombyx mori]
17	BGIBMGA004955	gi|226342886|ref|NP_001139705.1| serine protease inhibitor 13 precursor [Bombyx mori] gi|195972028|gb|ACG61176.1| serpin-13 [Bombyx mori]			22	BGIBMGA001151	gi|512913074|ref|XP_004927809.1| PREDICTED: proton-coupled amino acid transporter 4-like [Bombyx mori]
17	BGIBMGA006937	gi|357625725|gb|EHJ76074.1| troponin C [Danaus plexippus]			22	BGIBMGA002548	gi|112983982|ref|NP_001036835.1| cuticular protein RR-1 motif 4 precursor [Bombyx mori] gi|5360249|dbj|BAA81902.1| cuticle protein LCP18 [Bombyx mori] gi|223671109|tpd|FAA00506.1| TPA: putative cuticle protein [Bombyx mori]
17	BGIBMGA003894	gi|383858593|ref|XP_003704785.1| PREDICTED: proton-coupled amino acid transporter 1-like [Megachile rotundata]			22	BGIBMGA005278	gi|290563263|ref|NP_001166744.1| cuticular protein RR-1 motif 3 precursor [Bombyx mori] gi|223671107|tpd|FAA00505.1| TPA: putative cuticle protein [Bombyx mori]
17	BGIBMGA011866	gi|498970478|ref|XP_004526821.1| PREDICTED: uncharacterized protein LOC101452237 isoform X1 [Ceratitis capitata] gi|498970482|ref|XP_004526822.1| PREDICTED: uncharacterized protein LOC101452237 isoform X2 [Ceratitis capitata] gi|498970486|ref|XP_004526823.1| PREDICTED: uncharacterized protein LOC101452237 isoform X3 [Ceratitis capitata] gi|498970490|ref|XP_004526824.1| PREDICTED: uncharacterized …			22	BGIBMGA007067	gi|242010303|ref|XP_002425908.1| beat protein, putative [Pediculus humanus corporis] gi|212509884|gb|EEB13170.1| beat protein, putative [Pediculus humanus corporis]
17	BGIBMGA007546	gi|512899311|ref|XP_004924612.1| PREDICTED: esterase FE4-like [Bombyx mori]			22	BGIBMGA008029	gi|512892506|ref|XP_004922948.1| PREDICTED: probable allantoicase-like [Bombyx mori]
17	BGIBMGA001146	gi|512913057|ref|XP_004927807.1| PREDICTED: monocarboxylate transporter 7-like [Bombyx mori]			22	BGIBMGA010649	gi|571523568|ref|XP_003250145.2| PREDICTED: cell wall protein DAN4-like [Apis mellifera]
17	BGIBMGA011774	gi|512927984|ref|XP_004931470.1| PREDICTED: purine nucleoside phosphorylase-like isoform X2 [Bombyx mori]			22	BGIBMGA010933	gi|512899849|ref|XP_004924748.1| PREDICTED: proton-coupled folate transporter-like [Bombyx mori]
18	BGIBMGA004865	gi|112983654|ref|NP_001036872.1| Bombyrin precursor [Bombyx mori]			22	BGIBMGA013652	gi|512911311|ref|XP_004927380.1| PREDICTED: facilitated trehalose transporter Tret1-like [Bombyx mori]
18	BGIBMGA005024	gi|160425399|gb|ABX39543.1| single domain major allergen protein [Gonepteryx rhamni]			22	BGIBMGA014246	gi|512902421|ref|XP_004925372.1| PREDICTED: putative inorganic phosphate cotransporter-like [Bombyx mori]
18	BGIBMGA000736	gi|389609045|dbj|BAM18134.1| unknown unsecreted protein [Papilio xuthus]			23	BGIBMGA000330	gi|224177574|ref|NP_001128676.2| cuticular protein glycine-rich 21 precursor [Bombyx mori] gi|224038239|gb|ACH78251.2| epidermal protein [Bombyx mori]
18	BGIBMGA013578	gi|512902156|ref|XP_004925306.1| PREDICTED: putative carbonic anhydrase 5-like [Bombyx mori]			23	BGIBMGA002548	gi|112983982|ref|NP_001036835.1| cuticular protein RR-1 motif 4 precursor [Bombyx mori] gi|5360249|dbj|BAA81902.1| cuticle protein LCP18 [Bombyx mori] gi|223671109|tpd|FAA00506.1| TPA: putative cuticle protein [Bombyx mori]
18	BGIBMGA007280	gi|512905259|ref|XP_004925899.1| PREDICTED: putative inorganic phosphate cotransporter-like [Bombyx mori]			23	BGIBMGA002549	gi|290563261|ref|NP_001166743.1| cuticular protein RR-1 motif 5 precursor [Bombyx mori] gi|223671111|tpd|FAA00507.1| TPA: putative cuticle protein [Bombyx mori]
18	BGIBMGA010329	gi|512907828|ref|XP_004926539.1| PREDICTED: LOW QUALITY PROTEIN: esterase B1-like [Bombyx mori]			23	BGIBMGA005278	gi|290563263|ref|NP_001166744.1| cuticular protein RR-1 motif 3 precursor [Bombyx mori] gi|223671107|tpd|FAA00505.1| TPA: putative cuticle protein [Bombyx mori]
18	BGIBMGA013638	gi|512907994|ref|XP_004926573.1| PREDICTED: synaptic vesicle 2-related protein-like [Bombyx mori]			23	BGIBMGA007067	gi|242010303|ref|XP_002425908.1| beat protein, putative [Pediculus humanus corporis] gi|212509884|gb|EEB13170.1| beat protein, putative [Pediculus humanus corporis]
18	BGIBMGA007324	gi|512911603|ref|XP_004927453.1| PREDICTED: homogentisate 1,2-dioxygenase-like [Bombyx mori]			23	BGIBMGA010933	gi|512899849|ref|XP_004924748.1| PREDICTED: proton-coupled folate transporter-like [Bombyx mori]
18	BGIBMGA008514	gi|512915582|ref|XP_004928424.1| PREDICTED: transmembrane protease serine 9-like [Bombyx mori]			23	BGIBMGA013652	gi|512911311|ref|XP_004927380.1| PREDICTED: facilitated trehalose transporter Tret1-like [Bombyx mori]
18	BGIBMGA005970	no hints			23	BGIBMGA014055	gi|512912491|ref|XP_004927669.1| PREDICTED: facilitated trehalose transporter Tret1-2 homolog [Bombyx mori]
18	BGIBMGA014298	no hints			23	BGIBMGA014246	gi|512902421|ref|XP_004925372.1| PREDICTED: putative inorganic phosphate cotransporter-like [Bombyx mori]
19	BGIBMGA002721	gi|112983202|ref|NP_001037019.1| putative deoxynucleoside kinase [Bombyx mori] gi|13506751|gb|AAK28318.1|AF226281_1 putative deoxynucleoside kinase [Bombyx mori]			24	BGIBMGA000330	gi|224177574|ref|NP_001128676.2| cuticular protein glycine-rich 21 precursor [Bombyx mori] gi|224038239|gb|ACH78251.2| epidermal protein [Bombyx mori]
19	BGIBMGA001587	gi|114052020|ref|NP_001040445.1| tropomyosin-1 [Bombyx mori] gi|121958906|sp|Q1HPU0.1|TPM1_BOMMO RecName: Full=Tropomyosin-1 gi|95102920|gb|ABF51401.1| tropomyosin 1 [Bombyx mori]			24	BGIBMGA001151	gi|512913074|ref|XP_004927809.1| PREDICTED: proton-coupled amino acid transporter 4-like [Bombyx mori]
19	BGIBMGA014227	gi|158299190|ref|XP_319309.3| AGAP010147-PA [Anopheles gambiae str. PEST] gi|157014247|gb|EAA43613.3| AGAP010147-PA [Anopheles gambiae str. PEST]			24	BGIBMGA002548	gi|112983982|ref|NP_001036835.1| cuticular protein RR-1 motif 4 precursor [Bombyx mori] gi|5360249|dbj|BAA81902.1| cuticle protein LCP18 [Bombyx mori] gi|223671109|tpd|FAA00506.1| TPA: putative cuticle protein [Bombyx mori]
19	BGIBMGA014226	gi|340718034|ref|XP_003397477.1| PREDICTED: myosin heavy chain, muscle-like isoform 2 [Bombus terrestris]			24	BGIBMGA002549	gi|290563261|ref|NP_001166743.1| cuticular protein RR-1 motif 5 precursor [Bombyx mori] gi|223671111|tpd|FAA00507.1| TPA: putative cuticle protein [Bombyx mori]
19	BGIBMGA006937	gi|357625725|gb|EHJ76074.1| troponin C [Danaus plexippus]			24	BGIBMGA005278	gi|290563263|ref|NP_001166744.1| cuticular protein RR-1 motif 3 precursor [Bombyx mori] gi|223671107|tpd|FAA00505.1| TPA: putative cuticle protein [Bombyx mori]
19	BGIBMGA003894	gi|383858593|ref|XP_003704785.1| PREDICTED: proton-coupled amino acid transporter 1-like [Megachile rotundata]			24	BGIBMGA007067	gi|242010303|ref|XP_002425908.1| beat protein, putative [Pediculus humanus corporis] gi|212509884|gb|EEB13170.1| beat protein, putative [Pediculus humanus corporis]
19	BGIBMGA011866	gi|498970478|ref|XP_004526821.1| PREDICTED: uncharacterized protein LOC101452237 isoform X1 [Ceratitis capitata] gi|498970482|ref|XP_004526822.1| PREDICTED: uncharacterized protein LOC101452237 isoform X2 [Ceratitis capitata] gi|498970486|ref|XP_004526823.1| PREDICTED: uncharacterized protein LOC101452237 isoform X3 [Ceratitis capitata] gi|498970490|ref|XP_004526824.1| PREDICTED: uncharacterized …			24	BGIBMGA008029	gi|512892506|ref|XP_004922948.1| PREDICTED: probable allantoicase-like [Bombyx mori]
19	BGIBMGA013416	gi|512895171|ref|XP_004923608.1| PREDICTED: filamin-A-like [Bombyx mori]			24	BGIBMGA010933	gi|512899849|ref|XP_004924748.1| PREDICTED: proton-coupled folate transporter-like [Bombyx mori]
19	BGIBMGA007546	gi|512899311|ref|XP_004924612.1| PREDICTED: esterase FE4-like [Bombyx mori]			24	BGIBMGA013652	gi|512911311|ref|XP_004927380.1| PREDICTED: facilitated trehalose transporter Tret1-like [Bombyx mori]
19	BGIBMGA011774	gi|512927984|ref|XP_004931470.1| PREDICTED: purine nucleoside phosphorylase-like isoform X2 [Bombyx mori]			24	BGIBMGA014246	gi|512902421|ref|XP_004925372.1| PREDICTED: putative inorganic phosphate cotransporter-like [Bombyx mori]
20	BGIBMGA002721	gi|112983202|ref|NP_001037019.1| putative deoxynucleoside kinase [Bombyx mori] gi|13506751|gb|AAK28318.1|AF226281_1 putative deoxynucleoside kinase [Bombyx mori]			25	BGIBMGA000330	gi|224177574|ref|NP_001128676.2| cuticular protein glycine-rich 21 precursor [Bombyx mori] gi|224038239|gb|ACH78251.2| epidermal protein [Bombyx mori]
20	BGIBMGA001587	gi|114052020|ref|NP_001040445.1| tropomyosin-1 [Bombyx mori] gi|121958906|sp|Q1HPU0.1|TPM1_BOMMO RecName: Full=Tropomyosin-1 gi|95102920|gb|ABF51401.1| tropomyosin 1 [Bombyx mori]			25	BGIBMGA001498	gi|512920408|ref|XP_004929625.1| PREDICTED: synaptic vesicle glycoprotein 2B-like isoform X1 [Bombyx mori] gi|512920412|ref|XP_004929626.1| PREDICTED: synaptic vesicle glycoprotein 2B-like isoform X2 [Bombyx mori]
20	BGIBMGA014227	gi|158299190|ref|XP_319309.3| AGAP010147-PA [Anopheles gambiae str. PEST] gi|157014247|gb|EAA43613.3| AGAP010147-PA [Anopheles gambiae str. PEST]			25	BGIBMGA002549	gi|290563261|ref|NP_001166743.1| cuticular protein RR-1 motif 5 precursor [Bombyx mori] gi|223671111|tpd|FAA00507.1| TPA: putative cuticle protein [Bombyx mori]
20	BGIBMGA014226	gi|340718034|ref|XP_003397477.1| PREDICTED: myosin heavy chain, muscle-like isoform 2 [Bombus terrestris]			25	BGIBMGA002565	gi|512931904|ref|XP_004932415.1| PREDICTED: uncharacterized protein LOC101746215 isoform X1 [Bombyx mori] gi|512931908|ref|XP_004932416.1| PREDICTED: uncharacterized protein LOC101746215 isoform X2 [Bombyx mori]
20	BGIBMGA006937	gi|357625725|gb|EHJ76074.1| troponin C [Danaus plexippus]			25	BGIBMGA005278	gi|290563263|ref|NP_001166744.1| cuticular protein RR-1 motif 3 precursor [Bombyx mori] gi|223671107|tpd|FAA00505.1| TPA: putative cuticle protein [Bombyx mori]
20	BGIBMGA003894	gi|383858593|ref|XP_003704785.1| PREDICTED: proton-coupled amino acid transporter 1-like [Megachile rotundata]			25	BGIBMGA006280	gi|112984270|ref|NP_001037462.1| cecropin-A precursor [Bombyx mori] gi|512938251|ref|XP_004933962.1| PREDICTED: cecropin-A-like [Bombyx mori] gi|2493573|sp|Q27239.1|CECA_BOMMO RecName: Full=Cecropin-A; Flags: Precursor gi|765344|gb|AAC60515.1| cecropin A [Bombyx mori] gi|1220101|dbj|BAA04217.1| preprocecropin A [Bombyx mori] gi|2970030|dbj|BAA25178.1| cecropin A [Bombyx mori] gi|2970032|dbj|BAA25…
20	BGIBMGA011866	gi|498970478|ref|XP_004526821.1| PREDICTED: uncharacterized protein LOC101452237 isoform X1 [Ceratitis capitata] gi|498970482|ref|XP_004526822.1| PREDICTED: uncharacterized protein LOC101452237 isoform X2 [Ceratitis capitata] gi|498970486|ref|XP_004526823.1| PREDICTED: uncharacterized protein LOC101452237 isoform X3 [Ceratitis capitata] gi|498970490|ref|XP_004526824.1| PREDICTED: uncharacterized …			25	BGIBMGA007067	gi|242010303|ref|XP_002425908.1| beat protein, putative [Pediculus humanus corporis] gi|212509884|gb|EEB13170.1| beat protein, putative [Pediculus humanus corporis]
20	BGIBMGA007546	gi|512899311|ref|XP_004924612.1| PREDICTED: esterase FE4-like [Bombyx mori]			25	BGIBMGA007558	gi|512899354|ref|XP_004924623.1| PREDICTED: inter-alpha-trypsin inhibitor heavy chain H4-like [Bombyx mori]
20	BGIBMGA001146	gi|512913057|ref|XP_004927807.1| PREDICTED: monocarboxylate transporter 7-like [Bombyx mori]			25	BGIBMGA010933	gi|512899849|ref|XP_004924748.1| PREDICTED: proton-coupled folate transporter-like [Bombyx mori]
20	BGIBMGA011774	gi|512927984|ref|XP_004931470.1| PREDICTED: purine nucleoside phosphorylase-like isoform X2 [Bombyx mori]			25	BGIBMGA014055	gi|512912491|ref|XP_004927669.1| PREDICTED: facilitated trehalose transporter Tret1-2 homolog [Bombyx mori]
21	BGIBMGA002721	gi|112983202|ref|NP_001037019.1| putative deoxynucleoside kinase [Bombyx mori] gi|13506751|gb|AAK28318.1|AF226281_1 putative deoxynucleoside kinase [Bombyx mori]			25	BGIBMGA014246	gi|512902421|ref|XP_004925372.1| PREDICTED: putative inorganic phosphate cotransporter-like [Bombyx mori]
21	BGIBMGA014227	gi|158299190|ref|XP_319309.3| AGAP010147-PA [Anopheles gambiae str. PEST] gi|157014247|gb|EAA43613.3| AGAP010147-PA [Anopheles gambiae str. PEST]			25	BGIBMGA014285	gi|112984270|ref|NP_001037462.1| cecropin-A precursor [Bombyx mori] gi|512938251|ref|XP_004933962.1| PREDICTED: cecropin-A-like [Bombyx mori] gi|2493573|sp|Q27239.1|CECA_BOMMO RecName: Full=Cecropin-A; Flags: Precursor gi|765344|gb|AAC60515.1| cecropin A [Bombyx mori] gi|1220101|dbj|BAA04217.1| preprocecropin A [Bombyx mori] gi|2970030|dbj|BAA25178.1| cecropin A [Bombyx mori] gi|2970032|dbj|BAA25…
21	BGIBMGA014226	gi|340718034|ref|XP_003397477.1| PREDICTED: myosin heavy chain, muscle-like isoform 2 [Bombus terrestris]			26	BGIBMGA000330	gi|224177574|ref|NP_001128676.2| cuticular protein glycine-rich 21 precursor [Bombyx mori] gi|224038239|gb|ACH78251.2| epidermal protein [Bombyx mori]
21	BGIBMGA006937	gi|357625725|gb|EHJ76074.1| troponin C [Danaus plexippus]			26	BGIBMGA001498	gi|512920408|ref|XP_004929625.1| PREDICTED: synaptic vesicle glycoprotein 2B-like isoform X1 [Bombyx mori] gi|512920412|ref|XP_004929626.1| PREDICTED: synaptic vesicle glycoprotein 2B-like isoform X2 [Bombyx mori]
21	BGIBMGA003894	gi|383858593|ref|XP_003704785.1| PREDICTED: proton-coupled amino acid transporter 1-like [Megachile rotundata]			26	BGIBMGA002549	gi|290563261|ref|NP_001166743.1| cuticular protein RR-1 motif 5 precursor [Bombyx mori] gi|223671111|tpd|FAA00507.1| TPA: putative cuticle protein [Bombyx mori]
21	BGIBMGA011866	gi|498970478|ref|XP_004526821.1| PREDICTED: uncharacterized protein LOC101452237 isoform X1 [Ceratitis capitata] gi|498970482|ref|XP_004526822.1| PREDICTED: uncharacterized protein LOC101452237 isoform X2 [Ceratitis capitata] gi|498970486|ref|XP_004526823.1| PREDICTED: uncharacterized protein LOC101452237 isoform X3 [Ceratitis capitata] gi|498970490|ref|XP_004526824.1| PREDICTED: uncharacterized …			26	BGIBMGA002565	gi|512931904|ref|XP_004932415.1| PREDICTED: uncharacterized protein LOC101746215 isoform X1 [Bombyx mori] gi|512931908|ref|XP_004932416.1| PREDICTED: uncharacterized protein LOC101746215 isoform X2 [Bombyx mori]
21	BGIBMGA011033	gi|512886289|ref|XP_004921733.1| PREDICTED: UDP-N-acetylglucosamine--peptide N-acetylglucosaminyltransferase 110 kDa subunit-like [Bombyx mori]			26	BGIBMGA002937	gi|182509194|ref|NP_001116808.1| nitric oxide synthase-like protein [Bombyx mori] gi|317411802|sp|B1B557.1|NOSL_BOMMO RecName: Full=Nitric oxide synthase-like protein gi|169643679|dbj|BAG12563.1| nitric-oxide synthase like protein [Bombyx mori]
21	BGIBMGA007546	gi|512899311|ref|XP_004924612.1| PREDICTED: esterase FE4-like [Bombyx mori]			26	BGIBMGA005278	gi|290563263|ref|NP_001166744.1| cuticular protein RR-1 motif 3 precursor [Bombyx mori] gi|223671107|tpd|FAA00505.1| TPA: putative cuticle protein [Bombyx mori]
21	BGIBMGA011774	gi|512927984|ref|XP_004931470.1| PREDICTED: purine nucleoside phosphorylase-like isoform X2 [Bombyx mori]			26	BGIBMGA007067	gi|242010303|ref|XP_002425908.1| beat protein, putative [Pediculus humanus corporis] gi|212509884|gb|EEB13170.1| beat protein, putative [Pediculus humanus corporis]
22	BGIBMGA011033	gi|512886289|ref|XP_004921733.1| PREDICTED: UDP-N-acetylglucosamine--peptide N-acetylglucosaminyltransferase 110 kDa subunit-like [Bombyx mori]			26	BGIBMGA007558	gi|512899354|ref|XP_004924623.1| PREDICTED: inter-alpha-trypsin inhibitor heavy chain H4-like [Bombyx mori]
22	BGIBMGA011774	gi|512927984|ref|XP_004931470.1| PREDICTED: purine nucleoside phosphorylase-like isoform X2 [Bombyx mori]			26	BGIBMGA010933	gi|512899849|ref|XP_004924748.1| PREDICTED: proton-coupled folate transporter-like [Bombyx mori]
22	BGIBMGA002692	gi|512932034|ref|XP_004932446.1| PREDICTED: guanine nucleotide exchange factor DBS-like [Bombyx mori]			26	BGIBMGA014055	gi|512912491|ref|XP_004927669.1| PREDICTED: facilitated trehalose transporter Tret1-2 homolog [Bombyx mori]
23	BGIBMGA004865	gi|112983654|ref|NP_001036872.1| Bombyrin precursor [Bombyx mori]			26	BGIBMGA014246	gi|512902421|ref|XP_004925372.1| PREDICTED: putative inorganic phosphate cotransporter-like [Bombyx mori]
23	BGIBMGA013700	gi|114052138|ref|NP_001040221.1| troponin T [Bombyx mori] gi|87248429|gb|ABD36267.1| troponin T [Bombyx mori]			26	BGIBMGA014285	gi|112984270|ref|NP_001037462.1| cecropin-A precursor [Bombyx mori] gi|512938251|ref|XP_004933962.1| PREDICTED: cecropin-A-like [Bombyx mori] gi|2493573|sp|Q27239.1|CECA_BOMMO RecName: Full=Cecropin-A; Flags: Precursor gi|765344|gb|AAC60515.1| cecropin A [Bombyx mori] gi|1220101|dbj|BAA04217.1| preprocecropin A [Bombyx mori] gi|2970030|dbj|BAA25178.1| cecropin A [Bombyx mori] gi|2970032|dbj|BAA25…
23	BGIBMGA005024	gi|160425399|gb|ABX39543.1| single domain major allergen protein [Gonepteryx rhamni]			27	BGIBMGA000330	gi|224177574|ref|NP_001128676.2| cuticular protein glycine-rich 21 precursor [Bombyx mori] gi|224038239|gb|ACH78251.2| epidermal protein [Bombyx mori]
23	BGIBMGA001031	gi|225346691|gb|ACN86368.1| troponin I transcript variant A [Bombyx mandarina]			27	BGIBMGA002548	gi|112983982|ref|NP_001036835.1| cuticular protein RR-1 motif 4 precursor [Bombyx mori] gi|5360249|dbj|BAA81902.1| cuticle protein LCP18 [Bombyx mori] gi|223671109|tpd|FAA00506.1| TPA: putative cuticle protein [Bombyx mori]
23	BGIBMGA001030	gi|225346693|gb|ACN86369.1| troponin I transcript variant B [Bombyx mandarina]			27	BGIBMGA002549	gi|290563261|ref|NP_001166743.1| cuticular protein RR-1 motif 5 precursor [Bombyx mori] gi|223671111|tpd|FAA00507.1| TPA: putative cuticle protein [Bombyx mori]
23	BGIBMGA000736	gi|389609045|dbj|BAM18134.1| unknown unsecreted protein [Papilio xuthus]			27	BGIBMGA002937	gi|182509194|ref|NP_001116808.1| nitric oxide synthase-like protein [Bombyx mori] gi|317411802|sp|B1B557.1|NOSL_BOMMO RecName: Full=Nitric oxide synthase-like protein gi|169643679|dbj|BAG12563.1| nitric-oxide synthase like protein [Bombyx mori]
23	BGIBMGA009088	gi|512898417|ref|XP_004924395.1| PREDICTED: uncharacterized protein LOC101737434 isoform X2 [Bombyx mori]			27	BGIBMGA005278	gi|290563263|ref|NP_001166744.1| cuticular protein RR-1 motif 3 precursor [Bombyx mori] gi|223671107|tpd|FAA00505.1| TPA: putative cuticle protein [Bombyx mori]
23	BGIBMGA013578	gi|512902156|ref|XP_004925306.1| PREDICTED: putative carbonic anhydrase 5-like [Bombyx mori]			27	BGIBMGA007067	gi|242010303|ref|XP_002425908.1| beat protein, putative [Pediculus humanus corporis] gi|212509884|gb|EEB13170.1| beat protein, putative [Pediculus humanus corporis]
23	BGIBMGA007280	gi|512905259|ref|XP_004925899.1| PREDICTED: putative inorganic phosphate cotransporter-like [Bombyx mori]			27	BGIBMGA007558	gi|512899354|ref|XP_004924623.1| PREDICTED: inter-alpha-trypsin inhibitor heavy chain H4-like [Bombyx mori]
23	BGIBMGA013638	gi|512907994|ref|XP_004926573.1| PREDICTED: synaptic vesicle 2-related protein-like [Bombyx mori]			27	BGIBMGA010933	gi|512899849|ref|XP_004924748.1| PREDICTED: proton-coupled folate transporter-like [Bombyx mori]
23	BGIBMGA007324	gi|512911603|ref|XP_004927453.1| PREDICTED: homogentisate 1,2-dioxygenase-like [Bombyx mori]			27	BGIBMGA014055	gi|512912491|ref|XP_004927669.1| PREDICTED: facilitated trehalose transporter Tret1-2 homolog [Bombyx mori]
23	BGIBMGA008514	gi|512915582|ref|XP_004928424.1| PREDICTED: transmembrane protease serine 9-like [Bombyx mori]			27	BGIBMGA014246	gi|512902421|ref|XP_004925372.1| PREDICTED: putative inorganic phosphate cotransporter-like [Bombyx mori]
23	BGIBMGA005970	no hints			27	BGIBMGA014285	gi|112984270|ref|NP_001037462.1| cecropin-A precursor [Bombyx mori] gi|512938251|ref|XP_004933962.1| PREDICTED: cecropin-A-like [Bombyx mori] gi|2493573|sp|Q27239.1|CECA_BOMMO RecName: Full=Cecropin-A; Flags: Precursor gi|765344|gb|AAC60515.1| cecropin A [Bombyx mori] gi|1220101|dbj|BAA04217.1| preprocecropin A [Bombyx mori] gi|2970030|dbj|BAA25178.1| cecropin A [Bombyx mori] gi|2970032|dbj|BAA25…
23	BGIBMGA014298	no hints			28	BGIBMGA000330	gi|224177574|ref|NP_001128676.2| cuticular protein glycine-rich 21 precursor [Bombyx mori] gi|224038239|gb|ACH78251.2| epidermal protein [Bombyx mori]
24	BGIBMGA004865	gi|112983654|ref|NP_001036872.1| Bombyrin precursor [Bombyx mori]			28	BGIBMGA001498	gi|512920408|ref|XP_004929625.1| PREDICTED: synaptic vesicle glycoprotein 2B-like isoform X1 [Bombyx mori] gi|512920412|ref|XP_004929626.1| PREDICTED: synaptic vesicle glycoprotein 2B-like isoform X2 [Bombyx mori]
24	BGIBMGA013700	gi|114052138|ref|NP_001040221.1| troponin T [Bombyx mori] gi|87248429|gb|ABD36267.1| troponin T [Bombyx mori]			28	BGIBMGA002549	gi|290563261|ref|NP_001166743.1| cuticular protein RR-1 motif 5 precursor [Bombyx mori] gi|223671111|tpd|FAA00507.1| TPA: putative cuticle protein [Bombyx mori]
24	BGIBMGA001202	gi|160333386|ref|NP_001103762.1| muscle LIM protein isoform 1 [Bombyx mori] gi|87248175|gb|ABD36140.1| muscle LIM protein [Bombyx mori]			28	BGIBMGA002565	gi|512931904|ref|XP_004932415.1| PREDICTED: uncharacterized protein LOC101746215 isoform X1 [Bombyx mori] gi|512931908|ref|XP_004932416.1| PREDICTED: uncharacterized protein LOC101746215 isoform X2 [Bombyx mori]
24	BGIBMGA005024	gi|160425399|gb|ABX39543.1| single domain major allergen protein [Gonepteryx rhamni]			28	BGIBMGA005278	gi|290563263|ref|NP_001166744.1| cuticular protein RR-1 motif 3 precursor [Bombyx mori] gi|223671107|tpd|FAA00505.1| TPA: putative cuticle protein [Bombyx mori]
24	BGIBMGA000736	gi|389609045|dbj|BAM18134.1| unknown unsecreted protein [Papilio xuthus]			28	BGIBMGA006280	gi|112984270|ref|NP_001037462.1| cecropin-A precursor [Bombyx mori] gi|512938251|ref|XP_004933962.1| PREDICTED: cecropin-A-like [Bombyx mori] gi|2493573|sp|Q27239.1|CECA_BOMMO RecName: Full=Cecropin-A; Flags: Precursor gi|765344|gb|AAC60515.1| cecropin A [Bombyx mori] gi|1220101|dbj|BAA04217.1| preprocecropin A [Bombyx mori] gi|2970030|dbj|BAA25178.1| cecropin A [Bombyx mori] gi|2970032|dbj|BAA25…
24	BGIBMGA005599	gi|512887474|ref|XP_004921931.1| PREDICTED: SLIT and NTRK-like protein 6-like [Bombyx mori]			28	BGIBMGA007067	gi|242010303|ref|XP_002425908.1| beat protein, putative [Pediculus humanus corporis] gi|212509884|gb|EEB13170.1| beat protein, putative [Pediculus humanus corporis]
24	BGIBMGA004546	gi|512894841|ref|XP_004923527.1| PREDICTED: LOW QUALITY PROTEIN: twitchin-like [Bombyx mori]			28	BGIBMGA007558	gi|512899354|ref|XP_004924623.1| PREDICTED: inter-alpha-trypsin inhibitor heavy chain H4-like [Bombyx mori]
24	BGIBMGA004547	gi|512894841|ref|XP_004923527.1| PREDICTED: LOW QUALITY PROTEIN: twitchin-like [Bombyx mori]			28	BGIBMGA010933	gi|512899849|ref|XP_004924748.1| PREDICTED: proton-coupled folate transporter-like [Bombyx mori]
24	BGIBMGA012548	gi|512901857|ref|XP_004925235.1| PREDICTED: sphingomyelin phosphodiesterase-like [Bombyx mori]			28	BGIBMGA010938	gi|512899829|ref|XP_004924743.1| PREDICTED: solute carrier family 46 member 3-like [Bombyx mori]
24	BGIBMGA009958	gi|512907484|ref|XP_004926454.1| PREDICTED: uncharacterized protein LOC101740638 isoform X1 [Bombyx mori] gi|512907488|ref|XP_004926455.1| PREDICTED: uncharacterized protein LOC101740638 isoform X2 [Bombyx mori]			28	BGIBMGA014246	gi|512902421|ref|XP_004925372.1| PREDICTED: putative inorganic phosphate cotransporter-like [Bombyx mori]
24	BGIBMGA013638	gi|512907994|ref|XP_004926573.1| PREDICTED: synaptic vesicle 2-related protein-like [Bombyx mori]			28	BGIBMGA014285	gi|112984270|ref|NP_001037462.1| cecropin-A precursor [Bombyx mori] gi|512938251|ref|XP_004933962.1| PREDICTED: cecropin-A-like [Bombyx mori] gi|2493573|sp|Q27239.1|CECA_BOMMO RecName: Full=Cecropin-A; Flags: Precursor gi|765344|gb|AAC60515.1| cecropin A [Bombyx mori] gi|1220101|dbj|BAA04217.1| preprocecropin A [Bombyx mori] gi|2970030|dbj|BAA25178.1| cecropin A [Bombyx mori] gi|2970032|dbj|BAA25…
24	BGIBMGA007675	gi|55583303|dbj|BAD69569.1| aquaporin AQP-Bom1 [Bombyx mori]			29	BGIBMGA000330	gi|224177574|ref|NP_001128676.2| cuticular protein glycine-rich 21 precursor [Bombyx mori] gi|224038239|gb|ACH78251.2| epidermal protein [Bombyx mori]
24	BGIBMGA005970	no hints			29	BGIBMGA001498	gi|512920408|ref|XP_004929625.1| PREDICTED: synaptic vesicle glycoprotein 2B-like isoform X1 [Bombyx mori] gi|512920412|ref|XP_004929626.1| PREDICTED: synaptic vesicle glycoprotein 2B-like isoform X2 [Bombyx mori]
24	BGIBMGA014298	no hints			29	BGIBMGA002565	gi|512931904|ref|XP_004932415.1| PREDICTED: uncharacterized protein LOC101746215 isoform X1 [Bombyx mori] gi|512931908|ref|XP_004932416.1| PREDICTED: uncharacterized protein LOC101746215 isoform X2 [Bombyx mori]
25	BGIBMGA012399	gi|112983008|ref|NP_001037592.1| sorbitol dehydrogenase [Bombyx mori] gi|108860581|dbj|BAE95831.1| sorbitol dehydrogenase-2 [Bombyx mori]			29	BGIBMGA002943	gi|512885771|ref|XP_004921651.1| PREDICTED: 15-hydroxyprostaglandin dehydrogenase [NAD(+)]-like [Bombyx mori]
25	BGIBMGA014226	gi|340718034|ref|XP_003397477.1| PREDICTED: myosin heavy chain, muscle-like isoform 2 [Bombus terrestris]			29	BGIBMGA005278	gi|290563263|ref|NP_001166744.1| cuticular protein RR-1 motif 3 precursor [Bombyx mori] gi|223671107|tpd|FAA00505.1| TPA: putative cuticle protein [Bombyx mori]
25	BGIBMGA011033	gi|512886289|ref|XP_004921733.1| PREDICTED: UDP-N-acetylglucosamine--peptide N-acetylglucosaminyltransferase 110 kDa subunit-like [Bombyx mori]			29	BGIBMGA006280	gi|112984270|ref|NP_001037462.1| cecropin-A precursor [Bombyx mori] gi|512938251|ref|XP_004933962.1| PREDICTED: cecropin-A-like [Bombyx mori] gi|2493573|sp|Q27239.1|CECA_BOMMO RecName: Full=Cecropin-A; Flags: Precursor gi|765344|gb|AAC60515.1| cecropin A [Bombyx mori] gi|1220101|dbj|BAA04217.1| preprocecropin A [Bombyx mori] gi|2970030|dbj|BAA25178.1| cecropin A [Bombyx mori] gi|2970032|dbj|BAA25…
25	BGIBMGA013228	gi|512891843|ref|XP_004922783.1| PREDICTED: bicaudal D-related protein homolog [Bombyx mori]			29	BGIBMGA007067	gi|242010303|ref|XP_002425908.1| beat protein, putative [Pediculus humanus corporis] gi|212509884|gb|EEB13170.1| beat protein, putative [Pediculus humanus corporis]
25	BGIBMGA004268	gi|512902337|ref|XP_004925351.1| PREDICTED: N-acetyltransferase ESCO1-like [Bombyx mori]			29	BGIBMGA007558	gi|512899354|ref|XP_004924623.1| PREDICTED: inter-alpha-trypsin inhibitor heavy chain H4-like [Bombyx mori]
25	BGIBMGA001277	gi|512914289|ref|XP_004928105.1| PREDICTED: cytochrome P450 CYP12A2-like [Bombyx mori]			29	BGIBMGA010933	gi|512899849|ref|XP_004924748.1| PREDICTED: proton-coupled folate transporter-like [Bombyx mori]
25	BGIBMGA006032	gi|512918574|ref|XP_004929167.1| PREDICTED: adenylate kinase isoenzyme 1-like isoform X1 [Bombyx mori]			29	BGIBMGA010938	gi|512899829|ref|XP_004924743.1| PREDICTED: solute carrier family 46 member 3-like [Bombyx mori]
25	BGIBMGA006151	gi|512919355|ref|XP_004929355.1| PREDICTED: integrin beta-3-like [Bombyx mori]			29	BGIBMGA014246	gi|512902421|ref|XP_004925372.1| PREDICTED: putative inorganic phosphate cotransporter-like [Bombyx mori]
25	BGIBMGA011440	gi|512933046|ref|XP_004932694.1| PREDICTED: uncharacterized protein LOC101739051 isoform X1 [Bombyx mori]			29	BGIBMGA014285	gi|112984270|ref|NP_001037462.1| cecropin-A precursor [Bombyx mori] gi|512938251|ref|XP_004933962.1| PREDICTED: cecropin-A-like [Bombyx mori] gi|2493573|sp|Q27239.1|CECA_BOMMO RecName: Full=Cecropin-A; Flags: Precursor gi|765344|gb|AAC60515.1| cecropin A [Bombyx mori] gi|1220101|dbj|BAA04217.1| preprocecropin A [Bombyx mori] gi|2970030|dbj|BAA25178.1| cecropin A [Bombyx mori] gi|2970032|dbj|BAA25…
26	BGIBMGA002721	gi|112983202|ref|NP_001037019.1| putative deoxynucleoside kinase [Bombyx mori] gi|13506751|gb|AAK28318.1|AF226281_1 putative deoxynucleoside kinase [Bombyx mori]			30	BGIBMGA000330	gi|224177574|ref|NP_001128676.2| cuticular protein glycine-rich 21 precursor [Bombyx mori] gi|224038239|gb|ACH78251.2| epidermal protein [Bombyx mori]
26	BGIBMGA014226	gi|340718034|ref|XP_003397477.1| PREDICTED: myosin heavy chain, muscle-like isoform 2 [Bombus terrestris]			30	BGIBMGA001151	gi|512913074|ref|XP_004927809.1| PREDICTED: proton-coupled amino acid transporter 4-like [Bombyx mori]
26	BGIBMGA006937	gi|357625725|gb|EHJ76074.1| troponin C [Danaus plexippus]			30	BGIBMGA002548	gi|112983982|ref|NP_001036835.1| cuticular protein RR-1 motif 4 precursor [Bombyx mori] gi|5360249|dbj|BAA81902.1| cuticle protein LCP18 [Bombyx mori] gi|223671109|tpd|FAA00506.1| TPA: putative cuticle protein [Bombyx mori]
26	BGIBMGA011033	gi|512886289|ref|XP_004921733.1| PREDICTED: UDP-N-acetylglucosamine--peptide N-acetylglucosaminyltransferase 110 kDa subunit-like [Bombyx mori]			30	BGIBMGA002549	gi|290563261|ref|NP_001166743.1| cuticular protein RR-1 motif 5 precursor [Bombyx mori] gi|223671111|tpd|FAA00507.1| TPA: putative cuticle protein [Bombyx mori]
26	BGIBMGA013228	gi|512891843|ref|XP_004922783.1| PREDICTED: bicaudal D-related protein homolog [Bombyx mori]			30	BGIBMGA005278	gi|290563263|ref|NP_001166744.1| cuticular protein RR-1 motif 3 precursor [Bombyx mori] gi|223671107|tpd|FAA00505.1| TPA: putative cuticle protein [Bombyx mori]
26	BGIBMGA004268	gi|512902337|ref|XP_004925351.1| PREDICTED: N-acetyltransferase ESCO1-like [Bombyx mori]			30	BGIBMGA007067	gi|242010303|ref|XP_002425908.1| beat protein, putative [Pediculus humanus corporis] gi|212509884|gb|EEB13170.1| beat protein, putative [Pediculus humanus corporis]
26	BGIBMGA006032	gi|512918574|ref|XP_004929167.1| PREDICTED: adenylate kinase isoenzyme 1-like isoform X1 [Bombyx mori]			30	BGIBMGA007558	gi|512899354|ref|XP_004924623.1| PREDICTED: inter-alpha-trypsin inhibitor heavy chain H4-like [Bombyx mori]
26	BGIBMGA011440	gi|512933046|ref|XP_004932694.1| PREDICTED: uncharacterized protein LOC101739051 isoform X1 [Bombyx mori]			30	BGIBMGA008029	gi|512892506|ref|XP_004922948.1| PREDICTED: probable allantoicase-like [Bombyx mori]
27	BGIBMGA002721	gi|112983202|ref|NP_001037019.1| putative deoxynucleoside kinase [Bombyx mori] gi|13506751|gb|AAK28318.1|AF226281_1 putative deoxynucleoside kinase [Bombyx mori]			30	BGIBMGA010933	gi|512899849|ref|XP_004924748.1| PREDICTED: proton-coupled folate transporter-like [Bombyx mori]
27	BGIBMGA014227	gi|158299190|ref|XP_319309.3| AGAP010147-PA [Anopheles gambiae str. PEST] gi|157014247|gb|EAA43613.3| AGAP010147-PA [Anopheles gambiae str. PEST]			30	BGIBMGA010938	gi|512899829|ref|XP_004924743.1| PREDICTED: solute carrier family 46 member 3-like [Bombyx mori]
27	BGIBMGA014226	gi|340718034|ref|XP_003397477.1| PREDICTED: myosin heavy chain, muscle-like isoform 2 [Bombus terrestris]			30	BGIBMGA014246	gi|512902421|ref|XP_004925372.1| PREDICTED: putative inorganic phosphate cotransporter-like [Bombyx mori]
27	BGIBMGA006937	gi|357625725|gb|EHJ76074.1| troponin C [Danaus plexippus]			30	BGIBMGA014285	gi|112984270|ref|NP_001037462.1| cecropin-A precursor [Bombyx mori] gi|512938251|ref|XP_004933962.1| PREDICTED: cecropin-A-like [Bombyx mori] gi|2493573|sp|Q27239.1|CECA_BOMMO RecName: Full=Cecropin-A; Flags: Precursor gi|765344|gb|AAC60515.1| cecropin A [Bombyx mori] gi|1220101|dbj|BAA04217.1| preprocecropin A [Bombyx mori] gi|2970030|dbj|BAA25178.1| cecropin A [Bombyx mori] gi|2970032|dbj|BAA25…
27	BGIBMGA003894	gi|383858593|ref|XP_003704785.1| PREDICTED: proton-coupled amino acid transporter 1-like [Megachile rotundata]			31	BGIBMGA000330	gi|224177574|ref|NP_001128676.2| cuticular protein glycine-rich 21 precursor [Bombyx mori] gi|224038239|gb|ACH78251.2| epidermal protein [Bombyx mori]
27	BGIBMGA011033	gi|512886289|ref|XP_004921733.1| PREDICTED: UDP-N-acetylglucosamine--peptide N-acetylglucosaminyltransferase 110 kDa subunit-like [Bombyx mori]			31	BGIBMGA001151	gi|512913074|ref|XP_004927809.1| PREDICTED: proton-coupled amino acid transporter 4-like [Bombyx mori]
27	BGIBMGA013228	gi|512891843|ref|XP_004922783.1| PREDICTED: bicaudal D-related protein homolog [Bombyx mori]			31	BGIBMGA002548	gi|112983982|ref|NP_001036835.1| cuticular protein RR-1 motif 4 precursor [Bombyx mori] gi|5360249|dbj|BAA81902.1| cuticle protein LCP18 [Bombyx mori] gi|223671109|tpd|FAA00506.1| TPA: putative cuticle protein [Bombyx mori]
27	BGIBMGA007546	gi|512899311|ref|XP_004924612.1| PREDICTED: esterase FE4-like [Bombyx mori]			31	BGIBMGA005278	gi|290563263|ref|NP_001166744.1| cuticular protein RR-1 motif 3 precursor [Bombyx mori] gi|223671107|tpd|FAA00505.1| TPA: putative cuticle protein [Bombyx mori]
27	BGIBMGA004268	gi|512902337|ref|XP_004925351.1| PREDICTED: N-acetyltransferase ESCO1-like [Bombyx mori]			31	BGIBMGA007067	gi|242010303|ref|XP_002425908.1| beat protein, putative [Pediculus humanus corporis] gi|212509884|gb|EEB13170.1| beat protein, putative [Pediculus humanus corporis]
27	BGIBMGA006032	gi|512918574|ref|XP_004929167.1| PREDICTED: adenylate kinase isoenzyme 1-like isoform X1 [Bombyx mori]			31	BGIBMGA007558	gi|512899354|ref|XP_004924623.1| PREDICTED: inter-alpha-trypsin inhibitor heavy chain H4-like [Bombyx mori]
27	BGIBMGA011774	gi|512927984|ref|XP_004931470.1| PREDICTED: purine nucleoside phosphorylase-like isoform X2 [Bombyx mori]			31	BGIBMGA008029	gi|512892506|ref|XP_004922948.1| PREDICTED: probable allantoicase-like [Bombyx mori]
28	BGIBMGA012399	gi|112983008|ref|NP_001037592.1| sorbitol dehydrogenase [Bombyx mori] gi|108860581|dbj|BAE95831.1| sorbitol dehydrogenase-2 [Bombyx mori]			31	BGIBMGA010649	gi|571523568|ref|XP_003250145.2| PREDICTED: cell wall protein DAN4-like [Apis mellifera]
28	BGIBMGA014226	gi|340718034|ref|XP_003397477.1| PREDICTED: myosin heavy chain, muscle-like isoform 2 [Bombus terrestris]			31	BGIBMGA010933	gi|512899849|ref|XP_004924748.1| PREDICTED: proton-coupled folate transporter-like [Bombyx mori]
28	BGIBMGA006937	gi|357625725|gb|EHJ76074.1| troponin C [Danaus plexippus]			31	BGIBMGA010938	gi|512899829|ref|XP_004924743.1| PREDICTED: solute carrier family 46 member 3-like [Bombyx mori]
28	BGIBMGA011033	gi|512886289|ref|XP_004921733.1| PREDICTED: UDP-N-acetylglucosamine--peptide N-acetylglucosaminyltransferase 110 kDa subunit-like [Bombyx mori]			31	BGIBMGA014246	gi|512902421|ref|XP_004925372.1| PREDICTED: putative inorganic phosphate cotransporter-like [Bombyx mori]
28	BGIBMGA013228	gi|512891843|ref|XP_004922783.1| PREDICTED: bicaudal D-related protein homolog [Bombyx mori]			31	BGIBMGA014285	gi|112984270|ref|NP_001037462.1| cecropin-A precursor [Bombyx mori] gi|512938251|ref|XP_004933962.1| PREDICTED: cecropin-A-like [Bombyx mori] gi|2493573|sp|Q27239.1|CECA_BOMMO RecName: Full=Cecropin-A; Flags: Precursor gi|765344|gb|AAC60515.1| cecropin A [Bombyx mori] gi|1220101|dbj|BAA04217.1| preprocecropin A [Bombyx mori] gi|2970030|dbj|BAA25178.1| cecropin A [Bombyx mori] gi|2970032|dbj|BAA25…
28	BGIBMGA004268	gi|512902337|ref|XP_004925351.1| PREDICTED: N-acetyltransferase ESCO1-like [Bombyx mori]			31	bmlnct_2507	NA
28	BGIBMGA006032	gi|512918574|ref|XP_004929167.1| PREDICTED: adenylate kinase isoenzyme 1-like isoform X1 [Bombyx mori]			32	BGIBMGA000330	gi|224177574|ref|NP_001128676.2| cuticular protein glycine-rich 21 precursor [Bombyx mori] gi|224038239|gb|ACH78251.2| epidermal protein [Bombyx mori]
28	BGIBMGA011440	gi|512933046|ref|XP_004932694.1| PREDICTED: uncharacterized protein LOC101739051 isoform X1 [Bombyx mori]			32	BGIBMGA001498	gi|512920408|ref|XP_004929625.1| PREDICTED: synaptic vesicle glycoprotein 2B-like isoform X1 [Bombyx mori] gi|512920412|ref|XP_004929626.1| PREDICTED: synaptic vesicle glycoprotein 2B-like isoform X2 [Bombyx mori]
29	BGIBMGA012399	gi|112983008|ref|NP_001037592.1| sorbitol dehydrogenase [Bombyx mori] gi|108860581|dbj|BAE95831.1| sorbitol dehydrogenase-2 [Bombyx mori]			32	BGIBMGA002549	gi|290563261|ref|NP_001166743.1| cuticular protein RR-1 motif 5 precursor [Bombyx mori] gi|223671111|tpd|FAA00507.1| TPA: putative cuticle protein [Bombyx mori]
29	BGIBMGA002259	gi|148298826|ref|NP_001091813.1| myosin regulatory light chain 2 [Bombyx mori] gi|122119463|sp|Q1HPS0.1|MLR_BOMMO RecName: Full=Myosin regulatory light chain 2; Short=MLC-2 gi|95102960|gb|ABF51421.1| myosin light chain 2 [Bombyx mori] gi|163963296|gb|ABY50568.1| myosin light chain 2 [Bombyx mandarina] gi|194371731|gb|ACF59735.1| myosin light chain 2 [Bombyx mori] gi|206114239|gb|ACI05250.1| myosi…			32	BGIBMGA003014	gi|512925839|ref|XP_004930937.1| PREDICTED: cytochrome b5-like [Bombyx mori]
29	BGIBMGA012864	gi|379698954|ref|NP_001243949.1| peptidoglycan recognition protein precursor [Bombyx mori] gi|355398229|gb|AER70118.1| peptidoglycan recognition protein [Bombyx mori]			32	BGIBMGA005278	gi|290563263|ref|NP_001166744.1| cuticular protein RR-1 motif 3 precursor [Bombyx mori] gi|223671107|tpd|FAA00505.1| TPA: putative cuticle protein [Bombyx mori]
29	BGIBMGA004894	gi|389610783|dbj|BAM19002.1| fau protein [Papilio polytes]			32	BGIBMGA006280	gi|112984270|ref|NP_001037462.1| cecropin-A precursor [Bombyx mori] gi|512938251|ref|XP_004933962.1| PREDICTED: cecropin-A-like [Bombyx mori] gi|2493573|sp|Q27239.1|CECA_BOMMO RecName: Full=Cecropin-A; Flags: Precursor gi|765344|gb|AAC60515.1| cecropin A [Bombyx mori] gi|1220101|dbj|BAA04217.1| preprocecropin A [Bombyx mori] gi|2970030|dbj|BAA25178.1| cecropin A [Bombyx mori] gi|2970032|dbj|BAA25…
29	BGIBMGA004893	gi|390178515|ref|XP_001359095.3| GA19674, isoform F [Drosophila pseudoobscura pseudoobscura] gi|388859475|gb|EAL28238.3| GA19674, isoform F [Drosophila pseudoobscura pseudoobscura]			32	BGIBMGA007067	gi|242010303|ref|XP_002425908.1| beat protein, putative [Pediculus humanus corporis] gi|212509884|gb|EEB13170.1| beat protein, putative [Pediculus humanus corporis]
29	BGIBMGA005789	gi|512896255|ref|XP_004923868.1| PREDICTED: transmembrane protein 205-like [Bombyx mori]			32	BGIBMGA007558	gi|512899354|ref|XP_004924623.1| PREDICTED: inter-alpha-trypsin inhibitor heavy chain H4-like [Bombyx mori]
29	BGIBMGA012491	gi|512896871|ref|XP_004924015.1| PREDICTED: fatty-acid amide hydrolase 2-like isoform X1 [Bombyx mori]			32	BGIBMGA010933	gi|512899849|ref|XP_004924748.1| PREDICTED: proton-coupled folate transporter-like [Bombyx mori]
29	BGIBMGA012526	gi|512901813|ref|XP_004925227.1| PREDICTED: alanine--glyoxylate aminotransferase 2-like [Bombyx mori]			32	BGIBMGA010938	gi|512899829|ref|XP_004924743.1| PREDICTED: solute carrier family 46 member 3-like [Bombyx mori]
29	BGIBMGA001277	gi|512914289|ref|XP_004928105.1| PREDICTED: cytochrome P450 CYP12A2-like [Bombyx mori]			32	BGIBMGA014246	gi|512902421|ref|XP_004925372.1| PREDICTED: putative inorganic phosphate cotransporter-like [Bombyx mori]
29	BGIBMGA006510	gi|512924481|ref|XP_004930606.1| PREDICTED: myosin light chain alkali-like isoform X1 [Bombyx mori]			32	BGIBMGA014285	gi|112984270|ref|NP_001037462.1| cecropin-A precursor [Bombyx mori] gi|512938251|ref|XP_004933962.1| PREDICTED: cecropin-A-like [Bombyx mori] gi|2493573|sp|Q27239.1|CECA_BOMMO RecName: Full=Cecropin-A; Flags: Precursor gi|765344|gb|AAC60515.1| cecropin A [Bombyx mori] gi|1220101|dbj|BAA04217.1| preprocecropin A [Bombyx mori] gi|2970030|dbj|BAA25178.1| cecropin A [Bombyx mori] gi|2970032|dbj|BAA25…
29	BGIBMGA005345	gi|512930762|ref|XP_004932140.1| PREDICTED: calcium-binding protein E63-1-like isoform X1 [Bombyx mori] gi|512930766|ref|XP_004932141.1| PREDICTED: calcium-binding protein E63-1-like isoform X2 [Bombyx mori]			33	BGIBMGA000330	gi|224177574|ref|NP_001128676.2| cuticular protein glycine-rich 21 precursor [Bombyx mori] gi|224038239|gb|ACH78251.2| epidermal protein [Bombyx mori]
29	BGIBMGA002660	gi|512931571|ref|XP_004932336.1| PREDICTED: myrosinase 1-like [Bombyx mori]			33	BGIBMGA000338	gi|290563462|ref|NP_001166719.1| cuticular protein RR-1 motif 32 precursor [Bombyx mori] gi|223671166|tpd|FAA00535.1| TPA: putative cuticle protein [Bombyx mori]
29	BGIBMGA003682	gi|585087537|gb|AHJ26004.1| YKI3, partial [Bombyx mori]			33	BGIBMGA001498	gi|512920408|ref|XP_004929625.1| PREDICTED: synaptic vesicle glycoprotein 2B-like isoform X1 [Bombyx mori] gi|512920412|ref|XP_004929626.1| PREDICTED: synaptic vesicle glycoprotein 2B-like isoform X2 [Bombyx mori]
29	BGIBMGA012133	gi|607303027|gb|EZA44919.1| conserved uncharacterized protein family 12 [Microplitis demolitor]			33	BGIBMGA002943	gi|512885771|ref|XP_004921651.1| PREDICTED: 15-hydroxyprostaglandin dehydrogenase [NAD(+)]-like [Bombyx mori]
29	bmlnct_1109	NA			33	BGIBMGA005278	gi|290563263|ref|NP_001166744.1| cuticular protein RR-1 motif 3 precursor [Bombyx mori] gi|223671107|tpd|FAA00505.1| TPA: putative cuticle protein [Bombyx mori]
30	BGIBMGA004865	gi|112983654|ref|NP_001036872.1| Bombyrin precursor [Bombyx mori]			33	BGIBMGA006280	gi|112984270|ref|NP_001037462.1| cecropin-A precursor [Bombyx mori] gi|512938251|ref|XP_004933962.1| PREDICTED: cecropin-A-like [Bombyx mori] gi|2493573|sp|Q27239.1|CECA_BOMMO RecName: Full=Cecropin-A; Flags: Precursor gi|765344|gb|AAC60515.1| cecropin A [Bombyx mori] gi|1220101|dbj|BAA04217.1| preprocecropin A [Bombyx mori] gi|2970030|dbj|BAA25178.1| cecropin A [Bombyx mori] gi|2970032|dbj|BAA25…
30	BGIBMGA013700	gi|114052138|ref|NP_001040221.1| troponin T [Bombyx mori] gi|87248429|gb|ABD36267.1| troponin T [Bombyx mori]			33	BGIBMGA007067	gi|242010303|ref|XP_002425908.1| beat protein, putative [Pediculus humanus corporis] gi|212509884|gb|EEB13170.1| beat protein, putative [Pediculus humanus corporis]
30	BGIBMGA001202	gi|160333386|ref|NP_001103762.1| muscle LIM protein isoform 1 [Bombyx mori] gi|87248175|gb|ABD36140.1| muscle LIM protein [Bombyx mori]			33	BGIBMGA007558	gi|512899354|ref|XP_004924623.1| PREDICTED: inter-alpha-trypsin inhibitor heavy chain H4-like [Bombyx mori]
30	BGIBMGA005024	gi|160425399|gb|ABX39543.1| single domain major allergen protein [Gonepteryx rhamni]			33	BGIBMGA010933	gi|512899849|ref|XP_004924748.1| PREDICTED: proton-coupled folate transporter-like [Bombyx mori]
30	BGIBMGA001030	gi|225346693|gb|ACN86369.1| troponin I transcript variant B [Bombyx mandarina]			33	BGIBMGA010938	gi|512899829|ref|XP_004924743.1| PREDICTED: solute carrier family 46 member 3-like [Bombyx mori]
30	BGIBMGA007735	gi|357624813|gb|EHJ75445.1| ABC transporter family C protein ABCC2 [Danaus plexippus]			33	BGIBMGA014246	gi|512902421|ref|XP_004925372.1| PREDICTED: putative inorganic phosphate cotransporter-like [Bombyx mori]
30	BGIBMGA005599	gi|512887474|ref|XP_004921931.1| PREDICTED: SLIT and NTRK-like protein 6-like [Bombyx mori]			33	BGIBMGA014257	gi|512902513|ref|XP_004925393.1| PREDICTED: putative inorganic phosphate cotransporter-like [Bombyx mori]
30	BGIBMGA004546	gi|512894841|ref|XP_004923527.1| PREDICTED: LOW QUALITY PROTEIN: twitchin-like [Bombyx mori]			33	BGIBMGA014285	gi|112984270|ref|NP_001037462.1| cecropin-A precursor [Bombyx mori] gi|512938251|ref|XP_004933962.1| PREDICTED: cecropin-A-like [Bombyx mori] gi|2493573|sp|Q27239.1|CECA_BOMMO RecName: Full=Cecropin-A; Flags: Precursor gi|765344|gb|AAC60515.1| cecropin A [Bombyx mori] gi|1220101|dbj|BAA04217.1| preprocecropin A [Bombyx mori] gi|2970030|dbj|BAA25178.1| cecropin A [Bombyx mori] gi|2970032|dbj|BAA25…
30	BGIBMGA004547	gi|512894841|ref|XP_004923527.1| PREDICTED: LOW QUALITY PROTEIN: twitchin-like [Bombyx mori]			33	bmlnct_2507	NA
30	BGIBMGA009088	gi|512898417|ref|XP_004924395.1| PREDICTED: uncharacterized protein LOC101737434 isoform X2 [Bombyx mori]			34	BGIBMGA000330	gi|224177574|ref|NP_001128676.2| cuticular protein glycine-rich 21 precursor [Bombyx mori] gi|224038239|gb|ACH78251.2| epidermal protein [Bombyx mori]
30	BGIBMGA007494	gi|512899603|ref|XP_004924686.1| PREDICTED: multidrug resistance protein 1A-like isoform X1 [Bombyx mori] gi|512899606|ref|XP_004924687.1| PREDICTED: multidrug resistance protein 1A-like isoform X2 [Bombyx mori]			34	BGIBMGA001498	gi|512920408|ref|XP_004929625.1| PREDICTED: synaptic vesicle glycoprotein 2B-like isoform X1 [Bombyx mori] gi|512920412|ref|XP_004929626.1| PREDICTED: synaptic vesicle glycoprotein 2B-like isoform X2 [Bombyx mori]
30	BGIBMGA012548	gi|512901857|ref|XP_004925235.1| PREDICTED: sphingomyelin phosphodiesterase-like [Bombyx mori]			34	BGIBMGA002549	gi|290563261|ref|NP_001166743.1| cuticular protein RR-1 motif 5 precursor [Bombyx mori] gi|223671111|tpd|FAA00507.1| TPA: putative cuticle protein [Bombyx mori]
30	BGIBMGA012221	gi|512911580|ref|XP_004927448.1| PREDICTED: melanotransferrin-like [Bombyx mori]			34	BGIBMGA003014	gi|512925839|ref|XP_004930937.1| PREDICTED: cytochrome b5-like [Bombyx mori]
30	BGIBMGA010111	gi|512927795|ref|XP_004931424.1| PREDICTED: pollen-specific leucine-rich repeat extensin-like protein 1-like [Bombyx mori]			34	BGIBMGA005278	gi|290563263|ref|NP_001166744.1| cuticular protein RR-1 motif 3 precursor [Bombyx mori] gi|223671107|tpd|FAA00505.1| TPA: putative cuticle protein [Bombyx mori]
30	BGIBMGA005970	no hints			34	BGIBMGA007067	gi|242010303|ref|XP_002425908.1| beat protein, putative [Pediculus humanus corporis] gi|212509884|gb|EEB13170.1| beat protein, putative [Pediculus humanus corporis]
30	BGIBMGA014298	no hints			34	BGIBMGA007558	gi|512899354|ref|XP_004924623.1| PREDICTED: inter-alpha-trypsin inhibitor heavy chain H4-like [Bombyx mori]
31	BGIBMGA002721	gi|112983202|ref|NP_001037019.1| putative deoxynucleoside kinase [Bombyx mori] gi|13506751|gb|AAK28318.1|AF226281_1 putative deoxynucleoside kinase [Bombyx mori]			34	BGIBMGA008029	gi|512892506|ref|XP_004922948.1| PREDICTED: probable allantoicase-like [Bombyx mori]
31	BGIBMGA001587	gi|114052020|ref|NP_001040445.1| tropomyosin-1 [Bombyx mori] gi|121958906|sp|Q1HPU0.1|TPM1_BOMMO RecName: Full=Tropomyosin-1 gi|95102920|gb|ABF51401.1| tropomyosin 1 [Bombyx mori]			34	BGIBMGA010933	gi|512899849|ref|XP_004924748.1| PREDICTED: proton-coupled folate transporter-like [Bombyx mori]
31	BGIBMGA002259	gi|148298826|ref|NP_001091813.1| myosin regulatory light chain 2 [Bombyx mori] gi|122119463|sp|Q1HPS0.1|MLR_BOMMO RecName: Full=Myosin regulatory light chain 2; Short=MLC-2 gi|95102960|gb|ABF51421.1| myosin light chain 2 [Bombyx mori] gi|163963296|gb|ABY50568.1| myosin light chain 2 [Bombyx mandarina] gi|194371731|gb|ACF59735.1| myosin light chain 2 [Bombyx mori] gi|206114239|gb|ACI05250.1| myosi…			34	BGIBMGA010938	gi|512899829|ref|XP_004924743.1| PREDICTED: solute carrier family 46 member 3-like [Bombyx mori]
31	BGIBMGA014227	gi|158299190|ref|XP_319309.3| AGAP010147-PA [Anopheles gambiae str. PEST] gi|157014247|gb|EAA43613.3| AGAP010147-PA [Anopheles gambiae str. PEST]			34	BGIBMGA014246	gi|512902421|ref|XP_004925372.1| PREDICTED: putative inorganic phosphate cotransporter-like [Bombyx mori]
31	BGIBMGA014226	gi|340718034|ref|XP_003397477.1| PREDICTED: myosin heavy chain, muscle-like isoform 2 [Bombus terrestris]			34	BGIBMGA014285	gi|112984270|ref|NP_001037462.1| cecropin-A precursor [Bombyx mori] gi|512938251|ref|XP_004933962.1| PREDICTED: cecropin-A-like [Bombyx mori] gi|2493573|sp|Q27239.1|CECA_BOMMO RecName: Full=Cecropin-A; Flags: Precursor gi|765344|gb|AAC60515.1| cecropin A [Bombyx mori] gi|1220101|dbj|BAA04217.1| preprocecropin A [Bombyx mori] gi|2970030|dbj|BAA25178.1| cecropin A [Bombyx mori] gi|2970032|dbj|BAA25…
31	BGIBMGA006937	gi|357625725|gb|EHJ76074.1| troponin C [Danaus plexippus]			35	BGIBMGA000330	gi|224177574|ref|NP_001128676.2| cuticular protein glycine-rich 21 precursor [Bombyx mori] gi|224038239|gb|ACH78251.2| epidermal protein [Bombyx mori]
31	BGIBMGA003894	gi|383858593|ref|XP_003704785.1| PREDICTED: proton-coupled amino acid transporter 1-like [Megachile rotundata]			35	BGIBMGA000338	gi|290563462|ref|NP_001166719.1| cuticular protein RR-1 motif 32 precursor [Bombyx mori] gi|223671166|tpd|FAA00535.1| TPA: putative cuticle protein [Bombyx mori]
31	BGIBMGA013228	gi|512891843|ref|XP_004922783.1| PREDICTED: bicaudal D-related protein homolog [Bombyx mori]			35	BGIBMGA001498	gi|512920408|ref|XP_004929625.1| PREDICTED: synaptic vesicle glycoprotein 2B-like isoform X1 [Bombyx mori] gi|512920412|ref|XP_004929626.1| PREDICTED: synaptic vesicle glycoprotein 2B-like isoform X2 [Bombyx mori]
31	BGIBMGA013416	gi|512895171|ref|XP_004923608.1| PREDICTED: filamin-A-like [Bombyx mori]			35	BGIBMGA005278	gi|290563263|ref|NP_001166744.1| cuticular protein RR-1 motif 3 precursor [Bombyx mori] gi|223671107|tpd|FAA00505.1| TPA: putative cuticle protein [Bombyx mori]
31	BGIBMGA007338	gi|512896816|ref|XP_004924001.1| PREDICTED: aquaporin-12A-like [Bombyx mori]			35	BGIBMGA007067	gi|242010303|ref|XP_002425908.1| beat protein, putative [Pediculus humanus corporis] gi|212509884|gb|EEB13170.1| beat protein, putative [Pediculus humanus corporis]
31	BGIBMGA007339	gi|512896816|ref|XP_004924001.1| PREDICTED: aquaporin-12A-like [Bombyx mori]			35	BGIBMGA007558	gi|512899354|ref|XP_004924623.1| PREDICTED: inter-alpha-trypsin inhibitor heavy chain H4-like [Bombyx mori]
31	BGIBMGA007546	gi|512899311|ref|XP_004924612.1| PREDICTED: esterase FE4-like [Bombyx mori]			35	BGIBMGA008029	gi|512892506|ref|XP_004922948.1| PREDICTED: probable allantoicase-like [Bombyx mori]
31	BGIBMGA001008	gi|512913049|ref|XP_004927805.1| PREDICTED: monocarboxylate transporter 9-like [Bombyx mori]			35	BGIBMGA010933	gi|512899849|ref|XP_004924748.1| PREDICTED: proton-coupled folate transporter-like [Bombyx mori]
31	BGIBMGA006510	gi|512924481|ref|XP_004930606.1| PREDICTED: myosin light chain alkali-like isoform X1 [Bombyx mori]			35	BGIBMGA010938	gi|512899829|ref|XP_004924743.1| PREDICTED: solute carrier family 46 member 3-like [Bombyx mori]
31	BGIBMGA011774	gi|512927984|ref|XP_004931470.1| PREDICTED: purine nucleoside phosphorylase-like isoform X2 [Bombyx mori]			35	BGIBMGA014246	gi|512902421|ref|XP_004925372.1| PREDICTED: putative inorganic phosphate cotransporter-like [Bombyx mori]
31	BGIBMGA013644	no hints			35	BGIBMGA014257	gi|512902513|ref|XP_004925393.1| PREDICTED: putative inorganic phosphate cotransporter-like [Bombyx mori]
32	BGIBMGA001587	gi|114052020|ref|NP_001040445.1| tropomyosin-1 [Bombyx mori] gi|121958906|sp|Q1HPU0.1|TPM1_BOMMO RecName: Full=Tropomyosin-1 gi|95102920|gb|ABF51401.1| tropomyosin 1 [Bombyx mori]			35	BGIBMGA014285	gi|112984270|ref|NP_001037462.1| cecropin-A precursor [Bombyx mori] gi|512938251|ref|XP_004933962.1| PREDICTED: cecropin-A-like [Bombyx mori] gi|2493573|sp|Q27239.1|CECA_BOMMO RecName: Full=Cecropin-A; Flags: Precursor gi|765344|gb|AAC60515.1| cecropin A [Bombyx mori] gi|1220101|dbj|BAA04217.1| preprocecropin A [Bombyx mori] gi|2970030|dbj|BAA25178.1| cecropin A [Bombyx mori] gi|2970032|dbj|BAA25…
32	BGIBMGA002259	gi|148298826|ref|NP_001091813.1| myosin regulatory light chain 2 [Bombyx mori] gi|122119463|sp|Q1HPS0.1|MLR_BOMMO RecName: Full=Myosin regulatory light chain 2; Short=MLC-2 gi|95102960|gb|ABF51421.1| myosin light chain 2 [Bombyx mori] gi|163963296|gb|ABY50568.1| myosin light chain 2 [Bombyx mandarina] gi|194371731|gb|ACF59735.1| myosin light chain 2 [Bombyx mori] gi|206114239|gb|ACI05250.1| myosi…			35	bmlnct_2507	NA
32	BGIBMGA014227	gi|158299190|ref|XP_319309.3| AGAP010147-PA [Anopheles gambiae str. PEST] gi|157014247|gb|EAA43613.3| AGAP010147-PA [Anopheles gambiae str. PEST]			36	BGIBMGA000330	gi|224177574|ref|NP_001128676.2| cuticular protein glycine-rich 21 precursor [Bombyx mori] gi|224038239|gb|ACH78251.2| epidermal protein [Bombyx mori]
32	BGIBMGA014226	gi|340718034|ref|XP_003397477.1| PREDICTED: myosin heavy chain, muscle-like isoform 2 [Bombus terrestris]			36	BGIBMGA001151	gi|512913074|ref|XP_004927809.1| PREDICTED: proton-coupled amino acid transporter 4-like [Bombyx mori]
32	BGIBMGA006937	gi|357625725|gb|EHJ76074.1| troponin C [Danaus plexippus]			36	BGIBMGA002549	gi|290563261|ref|NP_001166743.1| cuticular protein RR-1 motif 5 precursor [Bombyx mori] gi|223671111|tpd|FAA00507.1| TPA: putative cuticle protein [Bombyx mori]
32	BGIBMGA003894	gi|383858593|ref|XP_003704785.1| PREDICTED: proton-coupled amino acid transporter 1-like [Megachile rotundata]			36	BGIBMGA003014	gi|512925839|ref|XP_004930937.1| PREDICTED: cytochrome b5-like [Bombyx mori]
32	BGIBMGA013228	gi|512891843|ref|XP_004922783.1| PREDICTED: bicaudal D-related protein homolog [Bombyx mori]			36	BGIBMGA005278	gi|290563263|ref|NP_001166744.1| cuticular protein RR-1 motif 3 precursor [Bombyx mori] gi|223671107|tpd|FAA00505.1| TPA: putative cuticle protein [Bombyx mori]
32	BGIBMGA013416	gi|512895171|ref|XP_004923608.1| PREDICTED: filamin-A-like [Bombyx mori]			36	BGIBMGA007067	gi|242010303|ref|XP_002425908.1| beat protein, putative [Pediculus humanus corporis] gi|212509884|gb|EEB13170.1| beat protein, putative [Pediculus humanus corporis]
32	BGIBMGA007338	gi|512896816|ref|XP_004924001.1| PREDICTED: aquaporin-12A-like [Bombyx mori]			36	BGIBMGA007558	gi|512899354|ref|XP_004924623.1| PREDICTED: inter-alpha-trypsin inhibitor heavy chain H4-like [Bombyx mori]
32	BGIBMGA007339	gi|512896816|ref|XP_004924001.1| PREDICTED: aquaporin-12A-like [Bombyx mori]			36	BGIBMGA008029	gi|512892506|ref|XP_004922948.1| PREDICTED: probable allantoicase-like [Bombyx mori]
32	BGIBMGA007546	gi|512899311|ref|XP_004924612.1| PREDICTED: esterase FE4-like [Bombyx mori]			36	BGIBMGA010933	gi|512899849|ref|XP_004924748.1| PREDICTED: proton-coupled folate transporter-like [Bombyx mori]
32	BGIBMGA001008	gi|512913049|ref|XP_004927805.1| PREDICTED: monocarboxylate transporter 9-like [Bombyx mori]			36	BGIBMGA010938	gi|512899829|ref|XP_004924743.1| PREDICTED: solute carrier family 46 member 3-like [Bombyx mori]
32	BGIBMGA006510	gi|512924481|ref|XP_004930606.1| PREDICTED: myosin light chain alkali-like isoform X1 [Bombyx mori]			36	BGIBMGA014246	gi|512902421|ref|XP_004925372.1| PREDICTED: putative inorganic phosphate cotransporter-like [Bombyx mori]
32	BGIBMGA011774	gi|512927984|ref|XP_004931470.1| PREDICTED: purine nucleoside phosphorylase-like isoform X2 [Bombyx mori]			36	BGIBMGA014285	gi|112984270|ref|NP_001037462.1| cecropin-A precursor [Bombyx mori] gi|512938251|ref|XP_004933962.1| PREDICTED: cecropin-A-like [Bombyx mori] gi|2493573|sp|Q27239.1|CECA_BOMMO RecName: Full=Cecropin-A; Flags: Precursor gi|765344|gb|AAC60515.1| cecropin A [Bombyx mori] gi|1220101|dbj|BAA04217.1| preprocecropin A [Bombyx mori] gi|2970030|dbj|BAA25178.1| cecropin A [Bombyx mori] gi|2970032|dbj|BAA25…
32	BGIBMGA008950	gi|557760292|ref|XP_005179867.1| PREDICTED: transmembrane inner ear expressed protein-like [Musca domestica]			37	BGIBMGA000330	gi|224177574|ref|NP_001128676.2| cuticular protein glycine-rich 21 precursor [Bombyx mori] gi|224038239|gb|ACH78251.2| epidermal protein [Bombyx mori]
32	BGIBMGA013644	no hints			37	BGIBMGA000338	gi|290563462|ref|NP_001166719.1| cuticular protein RR-1 motif 32 precursor [Bombyx mori] gi|223671166|tpd|FAA00535.1| TPA: putative cuticle protein [Bombyx mori]
33	BGIBMGA006415	gi|112982938|ref|NP_001037099.1| chorion b-ZIP transcription factor [Bombyx mori] gi|54401523|gb|AAV34566.1| chorion b-ZIP transcription factor [Bombyx mori]			37	BGIBMGA001151	gi|512913074|ref|XP_004927809.1| PREDICTED: proton-coupled amino acid transporter 4-like [Bombyx mori]
33	BGIBMGA007553	gi|148298782|ref|NP_001091747.1| C-type lectin 16 precursor [Bombyx mori] gi|114796717|gb|ABI79325.1| C-type lectin [Bombyx mori]			37	BGIBMGA005278	gi|290563263|ref|NP_001166744.1| cuticular protein RR-1 motif 3 precursor [Bombyx mori] gi|223671107|tpd|FAA00505.1| TPA: putative cuticle protein [Bombyx mori]
33	BGIBMGA002259	gi|148298826|ref|NP_001091813.1| myosin regulatory light chain 2 [Bombyx mori] gi|122119463|sp|Q1HPS0.1|MLR_BOMMO RecName: Full=Myosin regulatory light chain 2; Short=MLC-2 gi|95102960|gb|ABF51421.1| myosin light chain 2 [Bombyx mori] gi|163963296|gb|ABY50568.1| myosin light chain 2 [Bombyx mandarina] gi|194371731|gb|ACF59735.1| myosin light chain 2 [Bombyx mori] gi|206114239|gb|ACI05250.1| myosi…			37	BGIBMGA007067	gi|242010303|ref|XP_002425908.1| beat protein, putative [Pediculus humanus corporis] gi|212509884|gb|EEB13170.1| beat protein, putative [Pediculus humanus corporis]
33	BGIBMGA014226	gi|340718034|ref|XP_003397477.1| PREDICTED: myosin heavy chain, muscle-like isoform 2 [Bombus terrestris]			37	BGIBMGA007558	gi|512899354|ref|XP_004924623.1| PREDICTED: inter-alpha-trypsin inhibitor heavy chain H4-like [Bombyx mori]
33	BGIBMGA006937	gi|357625725|gb|EHJ76074.1| troponin C [Danaus plexippus]			37	BGIBMGA008029	gi|512892506|ref|XP_004922948.1| PREDICTED: probable allantoicase-like [Bombyx mori]
33	BGIBMGA012864	gi|379698954|ref|NP_001243949.1| peptidoglycan recognition protein precursor [Bombyx mori] gi|355398229|gb|AER70118.1| peptidoglycan recognition protein [Bombyx mori]			37	BGIBMGA010649	gi|571523568|ref|XP_003250145.2| PREDICTED: cell wall protein DAN4-like [Apis mellifera]
33	BGIBMGA004894	gi|389610783|dbj|BAM19002.1| fau protein [Papilio polytes]			37	BGIBMGA010933	gi|512899849|ref|XP_004924748.1| PREDICTED: proton-coupled folate transporter-like [Bombyx mori]
33	BGIBMGA013416	gi|512895171|ref|XP_004923608.1| PREDICTED: filamin-A-like [Bombyx mori]			37	BGIBMGA010938	gi|512899829|ref|XP_004924743.1| PREDICTED: solute carrier family 46 member 3-like [Bombyx mori]
33	BGIBMGA007338	gi|512896816|ref|XP_004924001.1| PREDICTED: aquaporin-12A-like [Bombyx mori]			37	BGIBMGA014246	gi|512902421|ref|XP_004925372.1| PREDICTED: putative inorganic phosphate cotransporter-like [Bombyx mori]
33	BGIBMGA007339	gi|512896816|ref|XP_004924001.1| PREDICTED: aquaporin-12A-like [Bombyx mori]			37	BGIBMGA014257	gi|512902513|ref|XP_004925393.1| PREDICTED: putative inorganic phosphate cotransporter-like [Bombyx mori]
33	BGIBMGA012526	gi|512901813|ref|XP_004925227.1| PREDICTED: alanine--glyoxylate aminotransferase 2-like [Bombyx mori]			37	BGIBMGA014285	gi|112984270|ref|NP_001037462.1| cecropin-A precursor [Bombyx mori] gi|512938251|ref|XP_004933962.1| PREDICTED: cecropin-A-like [Bombyx mori] gi|2493573|sp|Q27239.1|CECA_BOMMO RecName: Full=Cecropin-A; Flags: Precursor gi|765344|gb|AAC60515.1| cecropin A [Bombyx mori] gi|1220101|dbj|BAA04217.1| preprocecropin A [Bombyx mori] gi|2970030|dbj|BAA25178.1| cecropin A [Bombyx mori] gi|2970032|dbj|BAA25…
33	BGIBMGA009608	gi|512907036|ref|XP_004926343.1| PREDICTED: phosphatidate phosphatase PPAPDC1B-like [Bombyx mori]			37	bmlnct_2507	NA
33	BGIBMGA001008	gi|512913049|ref|XP_004927805.1| PREDICTED: monocarboxylate transporter 9-like [Bombyx mori]			38	BGIBMGA000336	gi|290563241|ref|NP_001166717.1| cuticular protein RR-1 motif 34 precursor [Bombyx mori] gi|223671170|tpd|FAA00537.1| TPA: putative cuticle protein [Bombyx mori]
33	BGIBMGA006510	gi|512924481|ref|XP_004930606.1| PREDICTED: myosin light chain alkali-like isoform X1 [Bombyx mori]			38	BGIBMGA000504	gi|91079538|ref|XP_970846.1| PREDICTED: similar to ZK899.2 [Tribolium castaneum]
33	BGIBMGA002660	gi|512931571|ref|XP_004932336.1| PREDICTED: myrosinase 1-like [Bombyx mori]			38	BGIBMGA000725	gi|512921632|ref|XP_004929924.1| PREDICTED: multidrug resistance protein homolog 49-like [Bombyx mori]
33	BGIBMGA013644	no hints			38	BGIBMGA001092	gi|108869666|gb|EAT33891.1| AAEL013840-PA [Aedes aegypti]
33	bmlnct_1109	NA			38	BGIBMGA001337	gi|379699038|ref|NP_001243993.1| UDP-glycosyltransferase UGT41A1 precursor [Bombyx mori] gi|363896182|gb|AEW43175.1| UDP-glycosyltransferase UGT41A1 [Bombyx mori]
33	SilkDB_TCONS_00399274	NA			38	BGIBMGA001338	gi|379699038|ref|NP_001243993.1| UDP-glycosyltransferase UGT41A1 precursor [Bombyx mori] gi|363896182|gb|AEW43175.1| UDP-glycosyltransferase UGT41A1 [Bombyx mori]
34	BGIBMGA006415	gi|112982938|ref|NP_001037099.1| chorion b-ZIP transcription factor [Bombyx mori] gi|54401523|gb|AAV34566.1| chorion b-ZIP transcription factor [Bombyx mori]			38	BGIBMGA007319	gi|512912184|ref|XP_004927594.1| PREDICTED: mitochondrial uncoupling protein 4-like isoform X1 [Bombyx mori]
34	BGIBMGA007553	gi|148298782|ref|NP_001091747.1| C-type lectin 16 precursor [Bombyx mori] gi|114796717|gb|ABI79325.1| C-type lectin [Bombyx mori]			38	BGIBMGA010913	gi|290543468|ref|NP_001166291.1| cuticular protein RR-3 motif 148 precursor [Bombyx mori] gi|223671398|tpd|FAA00651.1| TPA: putative cuticle protein [Bombyx mori]
34	BGIBMGA002259	gi|148298826|ref|NP_001091813.1| myosin regulatory light chain 2 [Bombyx mori] gi|122119463|sp|Q1HPS0.1|MLR_BOMMO RecName: Full=Myosin regulatory light chain 2; Short=MLC-2 gi|95102960|gb|ABF51421.1| myosin light chain 2 [Bombyx mori] gi|163963296|gb|ABY50568.1| myosin light chain 2 [Bombyx mandarina] gi|194371731|gb|ACF59735.1| myosin light chain 2 [Bombyx mori] gi|206114239|gb|ACI05250.1| myosi…			38	BGIBMGA011834	gi|114051463|ref|NP_001040364.1| methionine sulfoxide reductase [Bombyx mori] gi|95102640|gb|ABF51258.1| methionine sulfoxide reductase [Bombyx mori]
34	BGIBMGA014226	gi|340718034|ref|XP_003397477.1| PREDICTED: myosin heavy chain, muscle-like isoform 2 [Bombus terrestris]			38	BGIBMGA012137	gi|512901561|ref|XP_004925165.1| PREDICTED: major facilitator superfamily domain-containing protein 6-like [Bombyx mori]
34	BGIBMGA006937	gi|357625725|gb|EHJ76074.1| troponin C [Danaus plexippus]			38	BGIBMGA013729	gi|512907213|ref|XP_004926386.1| PREDICTED: proton myo-inositol cotransporter-like [Bombyx mori]
34	BGIBMGA012864	gi|379698954|ref|NP_001243949.1| peptidoglycan recognition protein precursor [Bombyx mori] gi|355398229|gb|AER70118.1| peptidoglycan recognition protein [Bombyx mori]			38	BGIBMGA014052	gi|512912628|ref|XP_004927704.1| PREDICTED: major facilitator superfamily domain-containing protein 6-B-like [Bombyx mori]
34	BGIBMGA004894	gi|389610783|dbj|BAM19002.1| fau protein [Papilio polytes]			39	BGIBMGA000336	gi|290563241|ref|NP_001166717.1| cuticular protein RR-1 motif 34 precursor [Bombyx mori] gi|223671170|tpd|FAA00537.1| TPA: putative cuticle protein [Bombyx mori]
34	BGIBMGA004893	gi|390178515|ref|XP_001359095.3| GA19674, isoform F [Drosophila pseudoobscura pseudoobscura] gi|388859475|gb|EAL28238.3| GA19674, isoform F [Drosophila pseudoobscura pseudoobscura]			39	BGIBMGA000504	gi|91079538|ref|XP_970846.1| PREDICTED: similar to ZK899.2 [Tribolium castaneum]
34	BGIBMGA013416	gi|512895171|ref|XP_004923608.1| PREDICTED: filamin-A-like [Bombyx mori]			39	BGIBMGA000725	gi|512921632|ref|XP_004929924.1| PREDICTED: multidrug resistance protein homolog 49-like [Bombyx mori]
34	BGIBMGA007338	gi|512896816|ref|XP_004924001.1| PREDICTED: aquaporin-12A-like [Bombyx mori]			39	BGIBMGA001092	gi|108869666|gb|EAT33891.1| AAEL013840-PA [Aedes aegypti]
34	BGIBMGA007339	gi|512896816|ref|XP_004924001.1| PREDICTED: aquaporin-12A-like [Bombyx mori]			39	BGIBMGA001337	gi|379699038|ref|NP_001243993.1| UDP-glycosyltransferase UGT41A1 precursor [Bombyx mori] gi|363896182|gb|AEW43175.1| UDP-glycosyltransferase UGT41A1 [Bombyx mori]
34	BGIBMGA012526	gi|512901813|ref|XP_004925227.1| PREDICTED: alanine--glyoxylate aminotransferase 2-like [Bombyx mori]			39	BGIBMGA001338	gi|379699038|ref|NP_001243993.1| UDP-glycosyltransferase UGT41A1 precursor [Bombyx mori] gi|363896182|gb|AEW43175.1| UDP-glycosyltransferase UGT41A1 [Bombyx mori]
34	BGIBMGA009608	gi|512907036|ref|XP_004926343.1| PREDICTED: phosphatidate phosphatase PPAPDC1B-like [Bombyx mori]			39	BGIBMGA005582	gi|379698900|ref|NP_001243921.1| SOCS2-12 protein [Bombyx mori] gi|326632043|gb|ADZ99024.1| SOCS2-12 [Bombyx mori]
34	BGIBMGA001008	gi|512913049|ref|XP_004927805.1| PREDICTED: monocarboxylate transporter 9-like [Bombyx mori]			39	BGIBMGA007319	gi|512912184|ref|XP_004927594.1| PREDICTED: mitochondrial uncoupling protein 4-like isoform X1 [Bombyx mori]
34	BGIBMGA006510	gi|512924481|ref|XP_004930606.1| PREDICTED: myosin light chain alkali-like isoform X1 [Bombyx mori]			39	BGIBMGA010913	gi|290543468|ref|NP_001166291.1| cuticular protein RR-3 motif 148 precursor [Bombyx mori] gi|223671398|tpd|FAA00651.1| TPA: putative cuticle protein [Bombyx mori]
34	BGIBMGA002660	gi|512931571|ref|XP_004932336.1| PREDICTED: myrosinase 1-like [Bombyx mori]			39	BGIBMGA011834	gi|114051463|ref|NP_001040364.1| methionine sulfoxide reductase [Bombyx mori] gi|95102640|gb|ABF51258.1| methionine sulfoxide reductase [Bombyx mori]
34	BGIBMGA011440	gi|512933046|ref|XP_004932694.1| PREDICTED: uncharacterized protein LOC101739051 isoform X1 [Bombyx mori]			39	BGIBMGA012137	gi|512901561|ref|XP_004925165.1| PREDICTED: major facilitator superfamily domain-containing protein 6-like [Bombyx mori]
34	BGIBMGA013644	no hints			39	BGIBMGA012887	gi|512917329|ref|XP_004928861.1| PREDICTED: alpha-tocopherol transfer protein-like [Bombyx mori]
34	bmlnct_1109	NA			39	BGIBMGA014052	gi|512912628|ref|XP_004927704.1| PREDICTED: major facilitator superfamily domain-containing protein 6-B-like [Bombyx mori]
35	BGIBMGA012399	gi|112983008|ref|NP_001037592.1| sorbitol dehydrogenase [Bombyx mori] gi|108860581|dbj|BAE95831.1| sorbitol dehydrogenase-2 [Bombyx mori]			40	BGIBMGA000336	gi|290563241|ref|NP_001166717.1| cuticular protein RR-1 motif 34 precursor [Bombyx mori] gi|223671170|tpd|FAA00537.1| TPA: putative cuticle protein [Bombyx mori]
35	BGIBMGA002259	gi|148298826|ref|NP_001091813.1| myosin regulatory light chain 2 [Bombyx mori] gi|122119463|sp|Q1HPS0.1|MLR_BOMMO RecName: Full=Myosin regulatory light chain 2; Short=MLC-2 gi|95102960|gb|ABF51421.1| myosin light chain 2 [Bombyx mori] gi|163963296|gb|ABY50568.1| myosin light chain 2 [Bombyx mandarina] gi|194371731|gb|ACF59735.1| myosin light chain 2 [Bombyx mori] gi|206114239|gb|ACI05250.1| myosi…			40	BGIBMGA000504	gi|91079538|ref|XP_970846.1| PREDICTED: similar to ZK899.2 [Tribolium castaneum]
35	BGIBMGA014226	gi|340718034|ref|XP_003397477.1| PREDICTED: myosin heavy chain, muscle-like isoform 2 [Bombus terrestris]			40	BGIBMGA000725	gi|512921632|ref|XP_004929924.1| PREDICTED: multidrug resistance protein homolog 49-like [Bombyx mori]
35	BGIBMGA012864	gi|379698954|ref|NP_001243949.1| peptidoglycan recognition protein precursor [Bombyx mori] gi|355398229|gb|AER70118.1| peptidoglycan recognition protein [Bombyx mori]			40	BGIBMGA001092	gi|108869666|gb|EAT33891.1| AAEL013840-PA [Aedes aegypti]
35	BGIBMGA004894	gi|389610783|dbj|BAM19002.1| fau protein [Papilio polytes]			40	BGIBMGA001337	gi|379699038|ref|NP_001243993.1| UDP-glycosyltransferase UGT41A1 precursor [Bombyx mori] gi|363896182|gb|AEW43175.1| UDP-glycosyltransferase UGT41A1 [Bombyx mori]
35	BGIBMGA005789	gi|512896255|ref|XP_004923868.1| PREDICTED: transmembrane protein 205-like [Bombyx mori]			40	BGIBMGA001338	gi|379699038|ref|NP_001243993.1| UDP-glycosyltransferase UGT41A1 precursor [Bombyx mori] gi|363896182|gb|AEW43175.1| UDP-glycosyltransferase UGT41A1 [Bombyx mori]
35	BGIBMGA007338	gi|512896816|ref|XP_004924001.1| PREDICTED: aquaporin-12A-like [Bombyx mori]			40	BGIBMGA005950	gi|512919431|ref|XP_004929380.1| PREDICTED: putative leucine-rich repeat-containing protein DDB_G0290503-like [Bombyx mori]
35	BGIBMGA012526	gi|512901813|ref|XP_004925227.1| PREDICTED: alanine--glyoxylate aminotransferase 2-like [Bombyx mori]			40	BGIBMGA007319	gi|512912184|ref|XP_004927594.1| PREDICTED: mitochondrial uncoupling protein 4-like isoform X1 [Bombyx mori]
35	BGIBMGA001277	gi|512914289|ref|XP_004928105.1| PREDICTED: cytochrome P450 CYP12A2-like [Bombyx mori]			40	BGIBMGA010913	gi|290543468|ref|NP_001166291.1| cuticular protein RR-3 motif 148 precursor [Bombyx mori] gi|223671398|tpd|FAA00651.1| TPA: putative cuticle protein [Bombyx mori]
35	BGIBMGA006032	gi|512918574|ref|XP_004929167.1| PREDICTED: adenylate kinase isoenzyme 1-like isoform X1 [Bombyx mori]			40	BGIBMGA011834	gi|114051463|ref|NP_001040364.1| methionine sulfoxide reductase [Bombyx mori] gi|95102640|gb|ABF51258.1| methionine sulfoxide reductase [Bombyx mori]
35	BGIBMGA006151	gi|512919355|ref|XP_004929355.1| PREDICTED: integrin beta-3-like [Bombyx mori]			40	BGIBMGA012137	gi|512901561|ref|XP_004925165.1| PREDICTED: major facilitator superfamily domain-containing protein 6-like [Bombyx mori]
35	BGIBMGA006510	gi|512924481|ref|XP_004930606.1| PREDICTED: myosin light chain alkali-like isoform X1 [Bombyx mori]			40	BGIBMGA014052	gi|512912628|ref|XP_004927704.1| PREDICTED: major facilitator superfamily domain-containing protein 6-B-like [Bombyx mori]
35	BGIBMGA005345	gi|512930762|ref|XP_004932140.1| PREDICTED: calcium-binding protein E63-1-like isoform X1 [Bombyx mori] gi|512930766|ref|XP_004932141.1| PREDICTED: calcium-binding protein E63-1-like isoform X2 [Bombyx mori]			41	BGIBMGA000336	gi|290563241|ref|NP_001166717.1| cuticular protein RR-1 motif 34 precursor [Bombyx mori] gi|223671170|tpd|FAA00537.1| TPA: putative cuticle protein [Bombyx mori]
35	BGIBMGA002660	gi|512931571|ref|XP_004932336.1| PREDICTED: myrosinase 1-like [Bombyx mori]			41	BGIBMGA000504	gi|91079538|ref|XP_970846.1| PREDICTED: similar to ZK899.2 [Tribolium castaneum]
35	BGIBMGA011440	gi|512933046|ref|XP_004932694.1| PREDICTED: uncharacterized protein LOC101739051 isoform X1 [Bombyx mori]			41	BGIBMGA000725	gi|512921632|ref|XP_004929924.1| PREDICTED: multidrug resistance protein homolog 49-like [Bombyx mori]
35	BGIBMGA003682	gi|585087537|gb|AHJ26004.1| YKI3, partial [Bombyx mori]			41	BGIBMGA001092	gi|108869666|gb|EAT33891.1| AAEL013840-PA [Aedes aegypti]
35	bmlnct_1109	NA			41	BGIBMGA001337	gi|379699038|ref|NP_001243993.1| UDP-glycosyltransferase UGT41A1 precursor [Bombyx mori] gi|363896182|gb|AEW43175.1| UDP-glycosyltransferase UGT41A1 [Bombyx mori]
36	BGIBMGA012399	gi|112983008|ref|NP_001037592.1| sorbitol dehydrogenase [Bombyx mori] gi|108860581|dbj|BAE95831.1| sorbitol dehydrogenase-2 [Bombyx mori]			41	BGIBMGA001338	gi|379699038|ref|NP_001243993.1| UDP-glycosyltransferase UGT41A1 precursor [Bombyx mori] gi|363896182|gb|AEW43175.1| UDP-glycosyltransferase UGT41A1 [Bombyx mori]
36	BGIBMGA002259	gi|148298826|ref|NP_001091813.1| myosin regulatory light chain 2 [Bombyx mori] gi|122119463|sp|Q1HPS0.1|MLR_BOMMO RecName: Full=Myosin regulatory light chain 2; Short=MLC-2 gi|95102960|gb|ABF51421.1| myosin light chain 2 [Bombyx mori] gi|163963296|gb|ABY50568.1| myosin light chain 2 [Bombyx mandarina] gi|194371731|gb|ACF59735.1| myosin light chain 2 [Bombyx mori] gi|206114239|gb|ACI05250.1| myosi…			41	BGIBMGA007319	gi|512912184|ref|XP_004927594.1| PREDICTED: mitochondrial uncoupling protein 4-like isoform X1 [Bombyx mori]
36	BGIBMGA014226	gi|340718034|ref|XP_003397477.1| PREDICTED: myosin heavy chain, muscle-like isoform 2 [Bombus terrestris]			41	BGIBMGA007651	gi|512916502|ref|XP_004928656.1| PREDICTED: tenascin-like, partial [Bombyx mori]
36	BGIBMGA012864	gi|379698954|ref|NP_001243949.1| peptidoglycan recognition protein precursor [Bombyx mori] gi|355398229|gb|AER70118.1| peptidoglycan recognition protein [Bombyx mori]			41	BGIBMGA010913	gi|290543468|ref|NP_001166291.1| cuticular protein RR-3 motif 148 precursor [Bombyx mori] gi|223671398|tpd|FAA00651.1| TPA: putative cuticle protein [Bombyx mori]
36	BGIBMGA004894	gi|389610783|dbj|BAM19002.1| fau protein [Papilio polytes]			41	BGIBMGA011834	gi|114051463|ref|NP_001040364.1| methionine sulfoxide reductase [Bombyx mori] gi|95102640|gb|ABF51258.1| methionine sulfoxide reductase [Bombyx mori]
36	BGIBMGA005789	gi|512896255|ref|XP_004923868.1| PREDICTED: transmembrane protein 205-like [Bombyx mori]			41	BGIBMGA012137	gi|512901561|ref|XP_004925165.1| PREDICTED: major facilitator superfamily domain-containing protein 6-like [Bombyx mori]
36	BGIBMGA007338	gi|512896816|ref|XP_004924001.1| PREDICTED: aquaporin-12A-like [Bombyx mori]			41	BGIBMGA013729	gi|512907213|ref|XP_004926386.1| PREDICTED: proton myo-inositol cotransporter-like [Bombyx mori]
36	BGIBMGA012491	gi|512896871|ref|XP_004924015.1| PREDICTED: fatty-acid amide hydrolase 2-like isoform X1 [Bombyx mori]			42	BGIBMGA000336	gi|290563241|ref|NP_001166717.1| cuticular protein RR-1 motif 34 precursor [Bombyx mori] gi|223671170|tpd|FAA00537.1| TPA: putative cuticle protein [Bombyx mori]
36	BGIBMGA012526	gi|512901813|ref|XP_004925227.1| PREDICTED: alanine--glyoxylate aminotransferase 2-like [Bombyx mori]			42	BGIBMGA000504	gi|91079538|ref|XP_970846.1| PREDICTED: similar to ZK899.2 [Tribolium castaneum]
36	BGIBMGA001277	gi|512914289|ref|XP_004928105.1| PREDICTED: cytochrome P450 CYP12A2-like [Bombyx mori]			42	BGIBMGA000725	gi|512921632|ref|XP_004929924.1| PREDICTED: multidrug resistance protein homolog 49-like [Bombyx mori]
36	BGIBMGA006032	gi|512918574|ref|XP_004929167.1| PREDICTED: adenylate kinase isoenzyme 1-like isoform X1 [Bombyx mori]			42	BGIBMGA001092	gi|108869666|gb|EAT33891.1| AAEL013840-PA [Aedes aegypti]
36	BGIBMGA006151	gi|512919355|ref|XP_004929355.1| PREDICTED: integrin beta-3-like [Bombyx mori]			42	BGIBMGA001337	gi|379699038|ref|NP_001243993.1| UDP-glycosyltransferase UGT41A1 precursor [Bombyx mori] gi|363896182|gb|AEW43175.1| UDP-glycosyltransferase UGT41A1 [Bombyx mori]
36	BGIBMGA006510	gi|512924481|ref|XP_004930606.1| PREDICTED: myosin light chain alkali-like isoform X1 [Bombyx mori]			42	BGIBMGA001338	gi|379699038|ref|NP_001243993.1| UDP-glycosyltransferase UGT41A1 precursor [Bombyx mori] gi|363896182|gb|AEW43175.1| UDP-glycosyltransferase UGT41A1 [Bombyx mori]
36	BGIBMGA005345	gi|512930762|ref|XP_004932140.1| PREDICTED: calcium-binding protein E63-1-like isoform X1 [Bombyx mori] gi|512930766|ref|XP_004932141.1| PREDICTED: calcium-binding protein E63-1-like isoform X2 [Bombyx mori]			42	BGIBMGA005582	gi|379698900|ref|NP_001243921.1| SOCS2-12 protein [Bombyx mori] gi|326632043|gb|ADZ99024.1| SOCS2-12 [Bombyx mori]
36	BGIBMGA002660	gi|512931571|ref|XP_004932336.1| PREDICTED: myrosinase 1-like [Bombyx mori]			42	BGIBMGA007319	gi|512912184|ref|XP_004927594.1| PREDICTED: mitochondrial uncoupling protein 4-like isoform X1 [Bombyx mori]
36	BGIBMGA003682	gi|585087537|gb|AHJ26004.1| YKI3, partial [Bombyx mori]			42	BGIBMGA007651	gi|512916502|ref|XP_004928656.1| PREDICTED: tenascin-like, partial [Bombyx mori]
36	bmlnct_1109	NA			42	BGIBMGA010913	gi|290543468|ref|NP_001166291.1| cuticular protein RR-3 motif 148 precursor [Bombyx mori] gi|223671398|tpd|FAA00651.1| TPA: putative cuticle protein [Bombyx mori]
37	BGIBMGA012399	gi|112983008|ref|NP_001037592.1| sorbitol dehydrogenase [Bombyx mori] gi|108860581|dbj|BAE95831.1| sorbitol dehydrogenase-2 [Bombyx mori]			42	BGIBMGA011834	gi|114051463|ref|NP_001040364.1| methionine sulfoxide reductase [Bombyx mori] gi|95102640|gb|ABF51258.1| methionine sulfoxide reductase [Bombyx mori]
37	BGIBMGA002259	gi|148298826|ref|NP_001091813.1| myosin regulatory light chain 2 [Bombyx mori] gi|122119463|sp|Q1HPS0.1|MLR_BOMMO RecName: Full=Myosin regulatory light chain 2; Short=MLC-2 gi|95102960|gb|ABF51421.1| myosin light chain 2 [Bombyx mori] gi|163963296|gb|ABY50568.1| myosin light chain 2 [Bombyx mandarina] gi|194371731|gb|ACF59735.1| myosin light chain 2 [Bombyx mori] gi|206114239|gb|ACI05250.1| myosi…			42	BGIBMGA012137	gi|512901561|ref|XP_004925165.1| PREDICTED: major facilitator superfamily domain-containing protein 6-like [Bombyx mori]
37	BGIBMGA014226	gi|340718034|ref|XP_003397477.1| PREDICTED: myosin heavy chain, muscle-like isoform 2 [Bombus terrestris]			42	BGIBMGA012887	gi|512917329|ref|XP_004928861.1| PREDICTED: alpha-tocopherol transfer protein-like [Bombyx mori]
37	BGIBMGA012864	gi|379698954|ref|NP_001243949.1| peptidoglycan recognition protein precursor [Bombyx mori] gi|355398229|gb|AER70118.1| peptidoglycan recognition protein [Bombyx mori]			43	BGIBMGA000336	gi|290563241|ref|NP_001166717.1| cuticular protein RR-1 motif 34 precursor [Bombyx mori] gi|223671170|tpd|FAA00537.1| TPA: putative cuticle protein [Bombyx mori]
37	BGIBMGA004894	gi|389610783|dbj|BAM19002.1| fau protein [Papilio polytes]			43	BGIBMGA000504	gi|91079538|ref|XP_970846.1| PREDICTED: similar to ZK899.2 [Tribolium castaneum]
37	BGIBMGA013228	gi|512891843|ref|XP_004922783.1| PREDICTED: bicaudal D-related protein homolog [Bombyx mori]			43	BGIBMGA000725	gi|512921632|ref|XP_004929924.1| PREDICTED: multidrug resistance protein homolog 49-like [Bombyx mori]
37	BGIBMGA007338	gi|512896816|ref|XP_004924001.1| PREDICTED: aquaporin-12A-like [Bombyx mori]			43	BGIBMGA001092	gi|108869666|gb|EAT33891.1| AAEL013840-PA [Aedes aegypti]
37	BGIBMGA012526	gi|512901813|ref|XP_004925227.1| PREDICTED: alanine--glyoxylate aminotransferase 2-like [Bombyx mori]			43	BGIBMGA001337	gi|379699038|ref|NP_001243993.1| UDP-glycosyltransferase UGT41A1 precursor [Bombyx mori] gi|363896182|gb|AEW43175.1| UDP-glycosyltransferase UGT41A1 [Bombyx mori]
37	BGIBMGA001277	gi|512914289|ref|XP_004928105.1| PREDICTED: cytochrome P450 CYP12A2-like [Bombyx mori]			43	BGIBMGA001338	gi|379699038|ref|NP_001243993.1| UDP-glycosyltransferase UGT41A1 precursor [Bombyx mori] gi|363896182|gb|AEW43175.1| UDP-glycosyltransferase UGT41A1 [Bombyx mori]
37	BGIBMGA006032	gi|512918574|ref|XP_004929167.1| PREDICTED: adenylate kinase isoenzyme 1-like isoform X1 [Bombyx mori]			43	BGIBMGA005950	gi|512919431|ref|XP_004929380.1| PREDICTED: putative leucine-rich repeat-containing protein DDB_G0290503-like [Bombyx mori]
37	BGIBMGA006151	gi|512919355|ref|XP_004929355.1| PREDICTED: integrin beta-3-like [Bombyx mori]			43	BGIBMGA007319	gi|512912184|ref|XP_004927594.1| PREDICTED: mitochondrial uncoupling protein 4-like isoform X1 [Bombyx mori]
37	BGIBMGA006510	gi|512924481|ref|XP_004930606.1| PREDICTED: myosin light chain alkali-like isoform X1 [Bombyx mori]			43	BGIBMGA007651	gi|512916502|ref|XP_004928656.1| PREDICTED: tenascin-like, partial [Bombyx mori]
37	BGIBMGA005345	gi|512930762|ref|XP_004932140.1| PREDICTED: calcium-binding protein E63-1-like isoform X1 [Bombyx mori] gi|512930766|ref|XP_004932141.1| PREDICTED: calcium-binding protein E63-1-like isoform X2 [Bombyx mori]			43	BGIBMGA010913	gi|290543468|ref|NP_001166291.1| cuticular protein RR-3 motif 148 precursor [Bombyx mori] gi|223671398|tpd|FAA00651.1| TPA: putative cuticle protein [Bombyx mori]
37	BGIBMGA002660	gi|512931571|ref|XP_004932336.1| PREDICTED: myrosinase 1-like [Bombyx mori]			43	BGIBMGA011834	gi|114051463|ref|NP_001040364.1| methionine sulfoxide reductase [Bombyx mori] gi|95102640|gb|ABF51258.1| methionine sulfoxide reductase [Bombyx mori]
37	BGIBMGA011440	gi|512933046|ref|XP_004932694.1| PREDICTED: uncharacterized protein LOC101739051 isoform X1 [Bombyx mori]			43	BGIBMGA012137	gi|512901561|ref|XP_004925165.1| PREDICTED: major facilitator superfamily domain-containing protein 6-like [Bombyx mori]
37	BGIBMGA003682	gi|585087537|gb|AHJ26004.1| YKI3, partial [Bombyx mori]			44	BGIBMGA000336	gi|290563241|ref|NP_001166717.1| cuticular protein RR-1 motif 34 precursor [Bombyx mori] gi|223671170|tpd|FAA00537.1| TPA: putative cuticle protein [Bombyx mori]
37	bmlnct_1109	NA			44	BGIBMGA000504	gi|91079538|ref|XP_970846.1| PREDICTED: similar to ZK899.2 [Tribolium castaneum]
38	BGIBMGA012399	gi|112983008|ref|NP_001037592.1| sorbitol dehydrogenase [Bombyx mori] gi|108860581|dbj|BAE95831.1| sorbitol dehydrogenase-2 [Bombyx mori]			44	BGIBMGA000725	gi|512921632|ref|XP_004929924.1| PREDICTED: multidrug resistance protein homolog 49-like [Bombyx mori]
38	BGIBMGA002259	gi|148298826|ref|NP_001091813.1| myosin regulatory light chain 2 [Bombyx mori] gi|122119463|sp|Q1HPS0.1|MLR_BOMMO RecName: Full=Myosin regulatory light chain 2; Short=MLC-2 gi|95102960|gb|ABF51421.1| myosin light chain 2 [Bombyx mori] gi|163963296|gb|ABY50568.1| myosin light chain 2 [Bombyx mandarina] gi|194371731|gb|ACF59735.1| myosin light chain 2 [Bombyx mori] gi|206114239|gb|ACI05250.1| myosi…			44	BGIBMGA001092	gi|108869666|gb|EAT33891.1| AAEL013840-PA [Aedes aegypti]
38	BGIBMGA014226	gi|340718034|ref|XP_003397477.1| PREDICTED: myosin heavy chain, muscle-like isoform 2 [Bombus terrestris]			44	BGIBMGA001337	gi|379699038|ref|NP_001243993.1| UDP-glycosyltransferase UGT41A1 precursor [Bombyx mori] gi|363896182|gb|AEW43175.1| UDP-glycosyltransferase UGT41A1 [Bombyx mori]
38	BGIBMGA012864	gi|379698954|ref|NP_001243949.1| peptidoglycan recognition protein precursor [Bombyx mori] gi|355398229|gb|AER70118.1| peptidoglycan recognition protein [Bombyx mori]			44	BGIBMGA001338	gi|379699038|ref|NP_001243993.1| UDP-glycosyltransferase UGT41A1 precursor [Bombyx mori] gi|363896182|gb|AEW43175.1| UDP-glycosyltransferase UGT41A1 [Bombyx mori]
38	BGIBMGA004894	gi|389610783|dbj|BAM19002.1| fau protein [Papilio polytes]			44	BGIBMGA004595	gi|512894745|ref|XP_004923503.1| PREDICTED: putative hexokinase HKDC1-like [Bombyx mori]
38	BGIBMGA013228	gi|512891843|ref|XP_004922783.1| PREDICTED: bicaudal D-related protein homolog [Bombyx mori]			44	BGIBMGA005950	gi|512919431|ref|XP_004929380.1| PREDICTED: putative leucine-rich repeat-containing protein DDB_G0290503-like [Bombyx mori]
38	BGIBMGA007338	gi|512896816|ref|XP_004924001.1| PREDICTED: aquaporin-12A-like [Bombyx mori]			44	BGIBMGA006214	gi|160333138|ref|NP_001103795.1| very low-density lipoprotein receptor isoform 1 precursor [Bombyx mori] gi|95102594|gb|ABF51235.1| very low-density lipoprotein receptor precursor isoform 1 [Bombyx mori] gi|308228544|gb|ADO24153.1| chitin deacetylase 1 [Bombyx mori]
38	BGIBMGA012526	gi|512901813|ref|XP_004925227.1| PREDICTED: alanine--glyoxylate aminotransferase 2-like [Bombyx mori]			44	BGIBMGA007144	gi|195963353|ref|NP_001124349.1| 3-hydroxyisobutyrate dehydrogenase [Bombyx mori] gi|189345326|gb|ACD92999.1| 3-hydroxyisobutyrate dehydrogenase [Bombyx mori]
38	BGIBMGA004268	gi|512902337|ref|XP_004925351.1| PREDICTED: N-acetyltransferase ESCO1-like [Bombyx mori]			44	BGIBMGA007319	gi|512912184|ref|XP_004927594.1| PREDICTED: mitochondrial uncoupling protein 4-like isoform X1 [Bombyx mori]
38	BGIBMGA001277	gi|512914289|ref|XP_004928105.1| PREDICTED: cytochrome P450 CYP12A2-like [Bombyx mori]			44	BGIBMGA007651	gi|512916502|ref|XP_004928656.1| PREDICTED: tenascin-like, partial [Bombyx mori]
38	BGIBMGA006032	gi|512918574|ref|XP_004929167.1| PREDICTED: adenylate kinase isoenzyme 1-like isoform X1 [Bombyx mori]			44	BGIBMGA007899	gi|512916360|ref|XP_004928622.1| PREDICTED: probable chitinase 3-like [Bombyx mori]
38	BGIBMGA006151	gi|512919355|ref|XP_004929355.1| PREDICTED: integrin beta-3-like [Bombyx mori]			44	BGIBMGA011834	gi|114051463|ref|NP_001040364.1| methionine sulfoxide reductase [Bombyx mori] gi|95102640|gb|ABF51258.1| methionine sulfoxide reductase [Bombyx mori]
38	BGIBMGA006510	gi|512924481|ref|XP_004930606.1| PREDICTED: myosin light chain alkali-like isoform X1 [Bombyx mori]			44	BGIBMGA012132	gi|512934129|ref|XP_004932959.1| PREDICTED: sodium-coupled monocarboxylate transporter 2-like [Bombyx mori]
38	BGIBMGA002660	gi|512931571|ref|XP_004932336.1| PREDICTED: myrosinase 1-like [Bombyx mori]			44	BGIBMGA012137	gi|512901561|ref|XP_004925165.1| PREDICTED: major facilitator superfamily domain-containing protein 6-like [Bombyx mori]
38	BGIBMGA011440	gi|512933046|ref|XP_004932694.1| PREDICTED: uncharacterized protein LOC101739051 isoform X1 [Bombyx mori]			45	BGIBMGA000336	gi|290563241|ref|NP_001166717.1| cuticular protein RR-1 motif 34 precursor [Bombyx mori] gi|223671170|tpd|FAA00537.1| TPA: putative cuticle protein [Bombyx mori]
38	BGIBMGA003682	gi|585087537|gb|AHJ26004.1| YKI3, partial [Bombyx mori]			45	BGIBMGA000504	gi|91079538|ref|XP_970846.1| PREDICTED: similar to ZK899.2 [Tribolium castaneum]
38	bmlnct_1109	NA			45	BGIBMGA000725	gi|512921632|ref|XP_004929924.1| PREDICTED: multidrug resistance protein homolog 49-like [Bombyx mori]
39	BGIBMGA006415	gi|112982938|ref|NP_001037099.1| chorion b-ZIP transcription factor [Bombyx mori] gi|54401523|gb|AAV34566.1| chorion b-ZIP transcription factor [Bombyx mori]			45	BGIBMGA001092	gi|108869666|gb|EAT33891.1| AAEL013840-PA [Aedes aegypti]
39	BGIBMGA012399	gi|112983008|ref|NP_001037592.1| sorbitol dehydrogenase [Bombyx mori] gi|108860581|dbj|BAE95831.1| sorbitol dehydrogenase-2 [Bombyx mori]			45	BGIBMGA001337	gi|379699038|ref|NP_001243993.1| UDP-glycosyltransferase UGT41A1 precursor [Bombyx mori] gi|363896182|gb|AEW43175.1| UDP-glycosyltransferase UGT41A1 [Bombyx mori]
39	BGIBMGA007553	gi|148298782|ref|NP_001091747.1| C-type lectin 16 precursor [Bombyx mori] gi|114796717|gb|ABI79325.1| C-type lectin [Bombyx mori]			45	BGIBMGA001338	gi|379699038|ref|NP_001243993.1| UDP-glycosyltransferase UGT41A1 precursor [Bombyx mori] gi|363896182|gb|AEW43175.1| UDP-glycosyltransferase UGT41A1 [Bombyx mori]
39	BGIBMGA002259	gi|148298826|ref|NP_001091813.1| myosin regulatory light chain 2 [Bombyx mori] gi|122119463|sp|Q1HPS0.1|MLR_BOMMO RecName: Full=Myosin regulatory light chain 2; Short=MLC-2 gi|95102960|gb|ABF51421.1| myosin light chain 2 [Bombyx mori] gi|163963296|gb|ABY50568.1| myosin light chain 2 [Bombyx mandarina] gi|194371731|gb|ACF59735.1| myosin light chain 2 [Bombyx mori] gi|206114239|gb|ACI05250.1| myosi…			45	BGIBMGA004595	gi|512894745|ref|XP_004923503.1| PREDICTED: putative hexokinase HKDC1-like [Bombyx mori]
39	BGIBMGA014226	gi|340718034|ref|XP_003397477.1| PREDICTED: myosin heavy chain, muscle-like isoform 2 [Bombus terrestris]			45	BGIBMGA006214	gi|160333138|ref|NP_001103795.1| very low-density lipoprotein receptor isoform 1 precursor [Bombyx mori] gi|95102594|gb|ABF51235.1| very low-density lipoprotein receptor precursor isoform 1 [Bombyx mori] gi|308228544|gb|ADO24153.1| chitin deacetylase 1 [Bombyx mori]
39	BGIBMGA006937	gi|357625725|gb|EHJ76074.1| troponin C [Danaus plexippus]			45	BGIBMGA007144	gi|195963353|ref|NP_001124349.1| 3-hydroxyisobutyrate dehydrogenase [Bombyx mori] gi|189345326|gb|ACD92999.1| 3-hydroxyisobutyrate dehydrogenase [Bombyx mori]
39	BGIBMGA012864	gi|379698954|ref|NP_001243949.1| peptidoglycan recognition protein precursor [Bombyx mori] gi|355398229|gb|AER70118.1| peptidoglycan recognition protein [Bombyx mori]			45	BGIBMGA007319	gi|512912184|ref|XP_004927594.1| PREDICTED: mitochondrial uncoupling protein 4-like isoform X1 [Bombyx mori]
39	BGIBMGA004894	gi|389610783|dbj|BAM19002.1| fau protein [Papilio polytes]			45	BGIBMGA007651	gi|512916502|ref|XP_004928656.1| PREDICTED: tenascin-like, partial [Bombyx mori]
39	BGIBMGA013228	gi|512891843|ref|XP_004922783.1| PREDICTED: bicaudal D-related protein homolog [Bombyx mori]			45	BGIBMGA007899	gi|512916360|ref|XP_004928622.1| PREDICTED: probable chitinase 3-like [Bombyx mori]
39	BGIBMGA013416	gi|512895171|ref|XP_004923608.1| PREDICTED: filamin-A-like [Bombyx mori]			45	BGIBMGA011834	gi|114051463|ref|NP_001040364.1| methionine sulfoxide reductase [Bombyx mori] gi|95102640|gb|ABF51258.1| methionine sulfoxide reductase [Bombyx mori]
39	BGIBMGA007338	gi|512896816|ref|XP_004924001.1| PREDICTED: aquaporin-12A-like [Bombyx mori]			45	BGIBMGA012132	gi|512934129|ref|XP_004932959.1| PREDICTED: sodium-coupled monocarboxylate transporter 2-like [Bombyx mori]
39	BGIBMGA007339	gi|512896816|ref|XP_004924001.1| PREDICTED: aquaporin-12A-like [Bombyx mori]			45	BGIBMGA012137	gi|512901561|ref|XP_004925165.1| PREDICTED: major facilitator superfamily domain-containing protein 6-like [Bombyx mori]
39	BGIBMGA012526	gi|512901813|ref|XP_004925227.1| PREDICTED: alanine--glyoxylate aminotransferase 2-like [Bombyx mori]			45	BGIBMGA013729	gi|512907213|ref|XP_004926386.1| PREDICTED: proton myo-inositol cotransporter-like [Bombyx mori]
39	BGIBMGA001008	gi|512913049|ref|XP_004927805.1| PREDICTED: monocarboxylate transporter 9-like [Bombyx mori]			45	BGIBMGA013924	gi|512936495|ref|XP_004933533.1| PREDICTED: vanin-like protein 3-like [Bombyx mori]
39	BGIBMGA006032	gi|512918574|ref|XP_004929167.1| PREDICTED: adenylate kinase isoenzyme 1-like isoform X1 [Bombyx mori]			46	BGIBMGA000336	gi|290563241|ref|NP_001166717.1| cuticular protein RR-1 motif 34 precursor [Bombyx mori] gi|223671170|tpd|FAA00537.1| TPA: putative cuticle protein [Bombyx mori]
39	BGIBMGA006510	gi|512924481|ref|XP_004930606.1| PREDICTED: myosin light chain alkali-like isoform X1 [Bombyx mori]			46	BGIBMGA000504	gi|91079538|ref|XP_970846.1| PREDICTED: similar to ZK899.2 [Tribolium castaneum]
39	BGIBMGA002660	gi|512931571|ref|XP_004932336.1| PREDICTED: myrosinase 1-like [Bombyx mori]			46	BGIBMGA000725	gi|512921632|ref|XP_004929924.1| PREDICTED: multidrug resistance protein homolog 49-like [Bombyx mori]
39	BGIBMGA003934	gi|607354114|gb|EZA48777.1| PPPDE peptidase domain-containing protein [Cerapachys biroi]			46	BGIBMGA001092	gi|108869666|gb|EAT33891.1| AAEL013840-PA [Aedes aegypti]
39	BGIBMGA013644	no hints			46	BGIBMGA001337	gi|379699038|ref|NP_001243993.1| UDP-glycosyltransferase UGT41A1 precursor [Bombyx mori] gi|363896182|gb|AEW43175.1| UDP-glycosyltransferase UGT41A1 [Bombyx mori]
39	bmlnct_1109	NA			46	BGIBMGA001338	gi|379699038|ref|NP_001243993.1| UDP-glycosyltransferase UGT41A1 precursor [Bombyx mori] gi|363896182|gb|AEW43175.1| UDP-glycosyltransferase UGT41A1 [Bombyx mori]
40	BGIBMGA001201	gi|114052470|ref|NP_001040476.1| muscular protein 20 [Bombyx mori] gi|95103052|gb|ABF51467.1| muscular protein 20 [Bombyx mori]			46	BGIBMGA004595	gi|512894745|ref|XP_004923503.1| PREDICTED: putative hexokinase HKDC1-like [Bombyx mori]
40	BGIBMGA013756	gi|171740881|gb|ACB54935.1| chitin deacetylase [Helicoverpa armigera]			46	BGIBMGA005582	gi|379698900|ref|NP_001243921.1| SOCS2-12 protein [Bombyx mori] gi|326632043|gb|ADZ99024.1| SOCS2-12 [Bombyx mori]
40	BGIBMGA001031	gi|225346691|gb|ACN86368.1| troponin I transcript variant A [Bombyx mandarina]			46	BGIBMGA006214	gi|160333138|ref|NP_001103795.1| very low-density lipoprotein receptor isoform 1 precursor [Bombyx mori] gi|95102594|gb|ABF51235.1| very low-density lipoprotein receptor precursor isoform 1 [Bombyx mori] gi|308228544|gb|ADO24153.1| chitin deacetylase 1 [Bombyx mori]
40	BGIBMGA001030	gi|225346693|gb|ACN86369.1| troponin I transcript variant B [Bombyx mandarina]			46	BGIBMGA007144	gi|195963353|ref|NP_001124349.1| 3-hydroxyisobutyrate dehydrogenase [Bombyx mori] gi|189345326|gb|ACD92999.1| 3-hydroxyisobutyrate dehydrogenase [Bombyx mori]
40	BGIBMGA003323	gi|375151601|ref|NP_001243511.1| putative membrane protein precursor [Bombyx mori] gi|221148494|gb|ACL99854.1| putative membrane protein [Bombyx mori]			46	BGIBMGA007319	gi|512912184|ref|XP_004927594.1| PREDICTED: mitochondrial uncoupling protein 4-like isoform X1 [Bombyx mori]
40	BGIBMGA000737	gi|389609045|dbj|BAM18134.1| unknown unsecreted protein [Papilio xuthus]			46	BGIBMGA007651	gi|512916502|ref|XP_004928656.1| PREDICTED: tenascin-like, partial [Bombyx mori]
40	BGIBMGA004801	gi|512894416|ref|XP_004923425.1| PREDICTED: zinc carboxypeptidase-like [Bombyx mori]			46	BGIBMGA007899	gi|512916360|ref|XP_004928622.1| PREDICTED: probable chitinase 3-like [Bombyx mori]
40	BGIBMGA013816	gi|512898251|ref|XP_004924354.1| PREDICTED: hydroxylysine kinase-like [Bombyx mori]			46	BGIBMGA011834	gi|114051463|ref|NP_001040364.1| methionine sulfoxide reductase [Bombyx mori] gi|95102640|gb|ABF51258.1| methionine sulfoxide reductase [Bombyx mori]
40	BGIBMGA009088	gi|512898417|ref|XP_004924395.1| PREDICTED: uncharacterized protein LOC101737434 isoform X2 [Bombyx mori]			46	BGIBMGA012132	gi|512934129|ref|XP_004932959.1| PREDICTED: sodium-coupled monocarboxylate transporter 2-like [Bombyx mori]
40	BGIBMGA014126	gi|512901593|ref|XP_004925173.1| PREDICTED: RING finger protein nhl-1-like isoform X1 [Bombyx mori] gi|512901597|ref|XP_004925174.1| PREDICTED: RING finger protein nhl-1-like isoform X2 [Bombyx mori]			46	BGIBMGA012137	gi|512901561|ref|XP_004925165.1| PREDICTED: major facilitator superfamily domain-containing protein 6-like [Bombyx mori]
40	BGIBMGA003326	gi|512902786|ref|XP_004925460.1| PREDICTED: uncharacterized protein LOC101738880 isoform X2 [Bombyx mori] gi|512902790|ref|XP_004925461.1| PREDICTED: uncharacterized protein LOC101738880 isoform X3 [Bombyx mori] gi|512902794|ref|XP_004925462.1| PREDICTED: uncharacterized protein LOC101738880 isoform X4 [Bombyx mori] gi|512902798|ref|XP_004925463.1| PREDICTED: uncharacterized protein LOC101738880 …			46	BGIBMGA012887	gi|512917329|ref|XP_004928861.1| PREDICTED: alpha-tocopherol transfer protein-like [Bombyx mori]
40	BGIBMGA007280	gi|512905259|ref|XP_004925899.1| PREDICTED: putative inorganic phosphate cotransporter-like [Bombyx mori]			46	BGIBMGA013924	gi|512936495|ref|XP_004933533.1| PREDICTED: vanin-like protein 3-like [Bombyx mori]
40	BGIBMGA013638	gi|512907994|ref|XP_004926573.1| PREDICTED: synaptic vesicle 2-related protein-like [Bombyx mori]			47	BGIBMGA000336	gi|290563241|ref|NP_001166717.1| cuticular protein RR-1 motif 34 precursor [Bombyx mori] gi|223671170|tpd|FAA00537.1| TPA: putative cuticle protein [Bombyx mori]
40	BGIBMGA005722	gi|512909029|ref|XP_004926822.1| PREDICTED: endothelin-converting enzyme 1-like [Bombyx mori]			47	BGIBMGA000504	gi|91079538|ref|XP_970846.1| PREDICTED: similar to ZK899.2 [Tribolium castaneum]
40	BGIBMGA007324	gi|512911603|ref|XP_004927453.1| PREDICTED: homogentisate 1,2-dioxygenase-like [Bombyx mori]			47	BGIBMGA000505	gi|108872502|gb|EAT36727.1| AAEL011213-PA [Aedes aegypti]
40	BGIBMGA014428	gi|512912568|ref|XP_004927690.1| PREDICTED: collagenase-like [Bombyx mori]			47	BGIBMGA001092	gi|108869666|gb|EAT33891.1| AAEL013840-PA [Aedes aegypti]
40	BGIBMGA001491	gi|512920851|ref|XP_004929736.1| PREDICTED: chondroitin proteoglycan 2-like [Bombyx mori]			47	BGIBMGA001337	gi|379699038|ref|NP_001243993.1| UDP-glycosyltransferase UGT41A1 precursor [Bombyx mori] gi|363896182|gb|AEW43175.1| UDP-glycosyltransferase UGT41A1 [Bombyx mori]
40	BGIBMGA001504	gi|512920899|ref|XP_004929748.1| PREDICTED: chondroitin proteoglycan 2-like, partial [Bombyx mori]			47	BGIBMGA001338	gi|379699038|ref|NP_001243993.1| UDP-glycosyltransferase UGT41A1 precursor [Bombyx mori] gi|363896182|gb|AEW43175.1| UDP-glycosyltransferase UGT41A1 [Bombyx mori]
40	BGIBMGA014429	gi|61191881|gb|AAX39408.1| serine protease [Bombyx mandarina] gi|164470774|gb|ABY58153.1| serine protease [Bombyx mandarina]			47	BGIBMGA001910	gi|512936257|ref|XP_004933474.1| PREDICTED: diuretic hormone receptor-like [Bombyx mori]
40	BGIBMGA003322	no hints			47	BGIBMGA004595	gi|512894745|ref|XP_004923503.1| PREDICTED: putative hexokinase HKDC1-like [Bombyx mori]
40	BGIBMGA005970	no hints			47	BGIBMGA006213	gi|389608119|dbj|BAM17671.1| chitin deacetylase 1 [Papilio xuthus]
41	BGIBMGA002721	gi|112983202|ref|NP_001037019.1| putative deoxynucleoside kinase [Bombyx mori] gi|13506751|gb|AAK28318.1|AF226281_1 putative deoxynucleoside kinase [Bombyx mori]			47	BGIBMGA006214	gi|160333138|ref|NP_001103795.1| very low-density lipoprotein receptor isoform 1 precursor [Bombyx mori] gi|95102594|gb|ABF51235.1| very low-density lipoprotein receptor precursor isoform 1 [Bombyx mori] gi|308228544|gb|ADO24153.1| chitin deacetylase 1 [Bombyx mori]
41	BGIBMGA002259	gi|148298826|ref|NP_001091813.1| myosin regulatory light chain 2 [Bombyx mori] gi|122119463|sp|Q1HPS0.1|MLR_BOMMO RecName: Full=Myosin regulatory light chain 2; Short=MLC-2 gi|95102960|gb|ABF51421.1| myosin light chain 2 [Bombyx mori] gi|163963296|gb|ABY50568.1| myosin light chain 2 [Bombyx mandarina] gi|194371731|gb|ACF59735.1| myosin light chain 2 [Bombyx mori] gi|206114239|gb|ACI05250.1| myosi…			47	BGIBMGA007144	gi|195963353|ref|NP_001124349.1| 3-hydroxyisobutyrate dehydrogenase [Bombyx mori] gi|189345326|gb|ACD92999.1| 3-hydroxyisobutyrate dehydrogenase [Bombyx mori]
41	BGIBMGA014227	gi|158299190|ref|XP_319309.3| AGAP010147-PA [Anopheles gambiae str. PEST] gi|157014247|gb|EAA43613.3| AGAP010147-PA [Anopheles gambiae str. PEST]			47	BGIBMGA007319	gi|512912184|ref|XP_004927594.1| PREDICTED: mitochondrial uncoupling protein 4-like isoform X1 [Bombyx mori]
41	BGIBMGA014226	gi|340718034|ref|XP_003397477.1| PREDICTED: myosin heavy chain, muscle-like isoform 2 [Bombus terrestris]			47	BGIBMGA007651	gi|512916502|ref|XP_004928656.1| PREDICTED: tenascin-like, partial [Bombyx mori]
41	BGIBMGA006937	gi|357625725|gb|EHJ76074.1| troponin C [Danaus plexippus]			47	BGIBMGA007899	gi|512916360|ref|XP_004928622.1| PREDICTED: probable chitinase 3-like [Bombyx mori]
41	BGIBMGA003894	gi|383858593|ref|XP_003704785.1| PREDICTED: proton-coupled amino acid transporter 1-like [Megachile rotundata]			47	BGIBMGA010742	gi|512934721|ref|XP_004933101.1| PREDICTED: facilitated trehalose transporter Tret1-like [Bombyx mori]
41	BGIBMGA013228	gi|512891843|ref|XP_004922783.1| PREDICTED: bicaudal D-related protein homolog [Bombyx mori]			47	BGIBMGA011834	gi|114051463|ref|NP_001040364.1| methionine sulfoxide reductase [Bombyx mori] gi|95102640|gb|ABF51258.1| methionine sulfoxide reductase [Bombyx mori]
41	BGIBMGA013416	gi|512895171|ref|XP_004923608.1| PREDICTED: filamin-A-like [Bombyx mori]			47	BGIBMGA012132	gi|512934129|ref|XP_004932959.1| PREDICTED: sodium-coupled monocarboxylate transporter 2-like [Bombyx mori]
41	BGIBMGA007338	gi|512896816|ref|XP_004924001.1| PREDICTED: aquaporin-12A-like [Bombyx mori]			47	BGIBMGA012137	gi|512901561|ref|XP_004925165.1| PREDICTED: major facilitator superfamily domain-containing protein 6-like [Bombyx mori]
41	BGIBMGA007339	gi|512896816|ref|XP_004924001.1| PREDICTED: aquaporin-12A-like [Bombyx mori]			47	BGIBMGA013729	gi|512907213|ref|XP_004926386.1| PREDICTED: proton myo-inositol cotransporter-like [Bombyx mori]
41	BGIBMGA007546	gi|512899311|ref|XP_004924612.1| PREDICTED: esterase FE4-like [Bombyx mori]			47	BGIBMGA013924	gi|512936495|ref|XP_004933533.1| PREDICTED: vanin-like protein 3-like [Bombyx mori]
41	BGIBMGA012526	gi|512901813|ref|XP_004925227.1| PREDICTED: alanine--glyoxylate aminotransferase 2-like [Bombyx mori]			48	BGIBMGA000336	gi|290563241|ref|NP_001166717.1| cuticular protein RR-1 motif 34 precursor [Bombyx mori] gi|223671170|tpd|FAA00537.1| TPA: putative cuticle protein [Bombyx mori]
41	BGIBMGA009977	gi|512907406|ref|XP_004926434.1| PREDICTED: PDZ and LIM domain protein 3-like isoform X3 [Bombyx mori]			48	BGIBMGA000504	gi|91079538|ref|XP_970846.1| PREDICTED: similar to ZK899.2 [Tribolium castaneum]
41	BGIBMGA001008	gi|512913049|ref|XP_004927805.1| PREDICTED: monocarboxylate transporter 9-like [Bombyx mori]			48	BGIBMGA000505	gi|108872502|gb|EAT36727.1| AAEL011213-PA [Aedes aegypti]
41	BGIBMGA006032	gi|512918574|ref|XP_004929167.1| PREDICTED: adenylate kinase isoenzyme 1-like isoform X1 [Bombyx mori]			48	BGIBMGA001092	gi|108869666|gb|EAT33891.1| AAEL013840-PA [Aedes aegypti]
41	BGIBMGA006510	gi|512924481|ref|XP_004930606.1| PREDICTED: myosin light chain alkali-like isoform X1 [Bombyx mori]			48	BGIBMGA001337	gi|379699038|ref|NP_001243993.1| UDP-glycosyltransferase UGT41A1 precursor [Bombyx mori] gi|363896182|gb|AEW43175.1| UDP-glycosyltransferase UGT41A1 [Bombyx mori]
41	BGIBMGA011774	gi|512927984|ref|XP_004931470.1| PREDICTED: purine nucleoside phosphorylase-like isoform X2 [Bombyx mori]			48	BGIBMGA001338	gi|379699038|ref|NP_001243993.1| UDP-glycosyltransferase UGT41A1 precursor [Bombyx mori] gi|363896182|gb|AEW43175.1| UDP-glycosyltransferase UGT41A1 [Bombyx mori]
41	BGIBMGA013644	no hints			48	BGIBMGA001910	gi|512936257|ref|XP_004933474.1| PREDICTED: diuretic hormone receptor-like [Bombyx mori]
41	bmlnct_1109	NA			48	BGIBMGA004595	gi|512894745|ref|XP_004923503.1| PREDICTED: putative hexokinase HKDC1-like [Bombyx mori]
42	BGIBMGA002259	gi|148298826|ref|NP_001091813.1| myosin regulatory light chain 2 [Bombyx mori] gi|122119463|sp|Q1HPS0.1|MLR_BOMMO RecName: Full=Myosin regulatory light chain 2; Short=MLC-2 gi|95102960|gb|ABF51421.1| myosin light chain 2 [Bombyx mori] gi|163963296|gb|ABY50568.1| myosin light chain 2 [Bombyx mandarina] gi|194371731|gb|ACF59735.1| myosin light chain 2 [Bombyx mori] gi|206114239|gb|ACI05250.1| myosi…			48	BGIBMGA005582	gi|379698900|ref|NP_001243921.1| SOCS2-12 protein [Bombyx mori] gi|326632043|gb|ADZ99024.1| SOCS2-12 [Bombyx mori]
42	BGIBMGA014227	gi|158299190|ref|XP_319309.3| AGAP010147-PA [Anopheles gambiae str. PEST] gi|157014247|gb|EAA43613.3| AGAP010147-PA [Anopheles gambiae str. PEST]			48	BGIBMGA006213	gi|389608119|dbj|BAM17671.1| chitin deacetylase 1 [Papilio xuthus]
42	BGIBMGA014226	gi|340718034|ref|XP_003397477.1| PREDICTED: myosin heavy chain, muscle-like isoform 2 [Bombus terrestris]			48	BGIBMGA006214	gi|160333138|ref|NP_001103795.1| very low-density lipoprotein receptor isoform 1 precursor [Bombyx mori] gi|95102594|gb|ABF51235.1| very low-density lipoprotein receptor precursor isoform 1 [Bombyx mori] gi|308228544|gb|ADO24153.1| chitin deacetylase 1 [Bombyx mori]
42	BGIBMGA006937	gi|357625725|gb|EHJ76074.1| troponin C [Danaus plexippus]			48	BGIBMGA007144	gi|195963353|ref|NP_001124349.1| 3-hydroxyisobutyrate dehydrogenase [Bombyx mori] gi|189345326|gb|ACD92999.1| 3-hydroxyisobutyrate dehydrogenase [Bombyx mori]
42	BGIBMGA003894	gi|383858593|ref|XP_003704785.1| PREDICTED: proton-coupled amino acid transporter 1-like [Megachile rotundata]			48	BGIBMGA007319	gi|512912184|ref|XP_004927594.1| PREDICTED: mitochondrial uncoupling protein 4-like isoform X1 [Bombyx mori]
42	BGIBMGA013228	gi|512891843|ref|XP_004922783.1| PREDICTED: bicaudal D-related protein homolog [Bombyx mori]			48	BGIBMGA007651	gi|512916502|ref|XP_004928656.1| PREDICTED: tenascin-like, partial [Bombyx mori]
42	BGIBMGA013416	gi|512895171|ref|XP_004923608.1| PREDICTED: filamin-A-like [Bombyx mori]			48	BGIBMGA007899	gi|512916360|ref|XP_004928622.1| PREDICTED: probable chitinase 3-like [Bombyx mori]
42	BGIBMGA007338	gi|512896816|ref|XP_004924001.1| PREDICTED: aquaporin-12A-like [Bombyx mori]			48	BGIBMGA010742	gi|512934721|ref|XP_004933101.1| PREDICTED: facilitated trehalose transporter Tret1-like [Bombyx mori]
42	BGIBMGA007339	gi|512896816|ref|XP_004924001.1| PREDICTED: aquaporin-12A-like [Bombyx mori]			48	BGIBMGA011834	gi|114051463|ref|NP_001040364.1| methionine sulfoxide reductase [Bombyx mori] gi|95102640|gb|ABF51258.1| methionine sulfoxide reductase [Bombyx mori]
42	BGIBMGA007546	gi|512899311|ref|XP_004924612.1| PREDICTED: esterase FE4-like [Bombyx mori]			48	BGIBMGA012132	gi|512934129|ref|XP_004932959.1| PREDICTED: sodium-coupled monocarboxylate transporter 2-like [Bombyx mori]
42	BGIBMGA012526	gi|512901813|ref|XP_004925227.1| PREDICTED: alanine--glyoxylate aminotransferase 2-like [Bombyx mori]			48	BGIBMGA012137	gi|512901561|ref|XP_004925165.1| PREDICTED: major facilitator superfamily domain-containing protein 6-like [Bombyx mori]
42	BGIBMGA009977	gi|512907406|ref|XP_004926434.1| PREDICTED: PDZ and LIM domain protein 3-like isoform X3 [Bombyx mori]			48	BGIBMGA012887	gi|512917329|ref|XP_004928861.1| PREDICTED: alpha-tocopherol transfer protein-like [Bombyx mori]
42	BGIBMGA001008	gi|512913049|ref|XP_004927805.1| PREDICTED: monocarboxylate transporter 9-like [Bombyx mori]			48	BGIBMGA013924	gi|512936495|ref|XP_004933533.1| PREDICTED: vanin-like protein 3-like [Bombyx mori]
42	BGIBMGA006032	gi|512918574|ref|XP_004929167.1| PREDICTED: adenylate kinase isoenzyme 1-like isoform X1 [Bombyx mori]			49	BGIBMGA000504	gi|91079538|ref|XP_970846.1| PREDICTED: similar to ZK899.2 [Tribolium castaneum]
42	BGIBMGA006510	gi|512924481|ref|XP_004930606.1| PREDICTED: myosin light chain alkali-like isoform X1 [Bombyx mori]			49	BGIBMGA000505	gi|108872502|gb|EAT36727.1| AAEL011213-PA [Aedes aegypti]
42	BGIBMGA011774	gi|512927984|ref|XP_004931470.1| PREDICTED: purine nucleoside phosphorylase-like isoform X2 [Bombyx mori]			49	BGIBMGA001092	gi|108869666|gb|EAT33891.1| AAEL013840-PA [Aedes aegypti]
42	BGIBMGA008950	gi|557760292|ref|XP_005179867.1| PREDICTED: transmembrane inner ear expressed protein-like [Musca domestica]			49	BGIBMGA001147	gi|512913984|ref|XP_004928028.1| PREDICTED: facilitated trehalose transporter Tret1-like [Bombyx mori]
42	BGIBMGA013644	no hints			49	BGIBMGA001237	gi|512913498|ref|XP_004927911.1| PREDICTED: branched-chain-amino-acid aminotransferase, cytosolic-like [Bombyx mori]
42	bmlnct_1109	NA			49	BGIBMGA001337	gi|379699038|ref|NP_001243993.1| UDP-glycosyltransferase UGT41A1 precursor [Bombyx mori] gi|363896182|gb|AEW43175.1| UDP-glycosyltransferase UGT41A1 [Bombyx mori]
43	BGIBMGA002721	gi|112983202|ref|NP_001037019.1| putative deoxynucleoside kinase [Bombyx mori] gi|13506751|gb|AAK28318.1|AF226281_1 putative deoxynucleoside kinase [Bombyx mori]			49	BGIBMGA001338	gi|379699038|ref|NP_001243993.1| UDP-glycosyltransferase UGT41A1 precursor [Bombyx mori] gi|363896182|gb|AEW43175.1| UDP-glycosyltransferase UGT41A1 [Bombyx mori]
43	BGIBMGA002259	gi|148298826|ref|NP_001091813.1| myosin regulatory light chain 2 [Bombyx mori] gi|122119463|sp|Q1HPS0.1|MLR_BOMMO RecName: Full=Myosin regulatory light chain 2; Short=MLC-2 gi|95102960|gb|ABF51421.1| myosin light chain 2 [Bombyx mori] gi|163963296|gb|ABY50568.1| myosin light chain 2 [Bombyx mandarina] gi|194371731|gb|ACF59735.1| myosin light chain 2 [Bombyx mori] gi|206114239|gb|ACI05250.1| myosi…			49	BGIBMGA001910	gi|512936257|ref|XP_004933474.1| PREDICTED: diuretic hormone receptor-like [Bombyx mori]
43	BGIBMGA014227	gi|158299190|ref|XP_319309.3| AGAP010147-PA [Anopheles gambiae str. PEST] gi|157014247|gb|EAA43613.3| AGAP010147-PA [Anopheles gambiae str. PEST]			49	BGIBMGA002712	gi|527487133|dbj|BAN66704.1| Bm-brown protein [Bombyx mori]
43	BGIBMGA014226	gi|340718034|ref|XP_003397477.1| PREDICTED: myosin heavy chain, muscle-like isoform 2 [Bombus terrestris]			49	BGIBMGA004595	gi|512894745|ref|XP_004923503.1| PREDICTED: putative hexokinase HKDC1-like [Bombyx mori]
43	BGIBMGA006937	gi|357625725|gb|EHJ76074.1| troponin C [Danaus plexippus]			49	BGIBMGA005582	gi|379698900|ref|NP_001243921.1| SOCS2-12 protein [Bombyx mori] gi|326632043|gb|ADZ99024.1| SOCS2-12 [Bombyx mori]
43	BGIBMGA003894	gi|383858593|ref|XP_003704785.1| PREDICTED: proton-coupled amino acid transporter 1-like [Megachile rotundata]			49	BGIBMGA006213	gi|389608119|dbj|BAM17671.1| chitin deacetylase 1 [Papilio xuthus]
43	BGIBMGA013228	gi|512891843|ref|XP_004922783.1| PREDICTED: bicaudal D-related protein homolog [Bombyx mori]			49	BGIBMGA006214	gi|160333138|ref|NP_001103795.1| very low-density lipoprotein receptor isoform 1 precursor [Bombyx mori] gi|95102594|gb|ABF51235.1| very low-density lipoprotein receptor precursor isoform 1 [Bombyx mori] gi|308228544|gb|ADO24153.1| chitin deacetylase 1 [Bombyx mori]
43	BGIBMGA013416	gi|512895171|ref|XP_004923608.1| PREDICTED: filamin-A-like [Bombyx mori]			49	BGIBMGA007144	gi|195963353|ref|NP_001124349.1| 3-hydroxyisobutyrate dehydrogenase [Bombyx mori] gi|189345326|gb|ACD92999.1| 3-hydroxyisobutyrate dehydrogenase [Bombyx mori]
43	BGIBMGA007338	gi|512896816|ref|XP_004924001.1| PREDICTED: aquaporin-12A-like [Bombyx mori]			49	BGIBMGA007319	gi|512912184|ref|XP_004927594.1| PREDICTED: mitochondrial uncoupling protein 4-like isoform X1 [Bombyx mori]
43	BGIBMGA007339	gi|512896816|ref|XP_004924001.1| PREDICTED: aquaporin-12A-like [Bombyx mori]			49	BGIBMGA007651	gi|512916502|ref|XP_004928656.1| PREDICTED: tenascin-like, partial [Bombyx mori]
43	BGIBMGA007546	gi|512899311|ref|XP_004924612.1| PREDICTED: esterase FE4-like [Bombyx mori]			49	BGIBMGA007899	gi|512916360|ref|XP_004928622.1| PREDICTED: probable chitinase 3-like [Bombyx mori]
43	BGIBMGA012526	gi|512901813|ref|XP_004925227.1| PREDICTED: alanine--glyoxylate aminotransferase 2-like [Bombyx mori]			49	BGIBMGA010742	gi|512934721|ref|XP_004933101.1| PREDICTED: facilitated trehalose transporter Tret1-like [Bombyx mori]
43	BGIBMGA004268	gi|512902337|ref|XP_004925351.1| PREDICTED: N-acetyltransferase ESCO1-like [Bombyx mori]			49	BGIBMGA011834	gi|114051463|ref|NP_001040364.1| methionine sulfoxide reductase [Bombyx mori] gi|95102640|gb|ABF51258.1| methionine sulfoxide reductase [Bombyx mori]
43	BGIBMGA001008	gi|512913049|ref|XP_004927805.1| PREDICTED: monocarboxylate transporter 9-like [Bombyx mori]			49	BGIBMGA012132	gi|512934129|ref|XP_004932959.1| PREDICTED: sodium-coupled monocarboxylate transporter 2-like [Bombyx mori]
43	BGIBMGA006032	gi|512918574|ref|XP_004929167.1| PREDICTED: adenylate kinase isoenzyme 1-like isoform X1 [Bombyx mori]			49	BGIBMGA012521	gi|512911868|ref|XP_004927517.1| PREDICTED: venom allergen 5-like [Bombyx mori]
43	BGIBMGA006510	gi|512924481|ref|XP_004930606.1| PREDICTED: myosin light chain alkali-like isoform X1 [Bombyx mori]			49	BGIBMGA013924	gi|512936495|ref|XP_004933533.1| PREDICTED: vanin-like protein 3-like [Bombyx mori]
43	BGIBMGA011774	gi|512927984|ref|XP_004931470.1| PREDICTED: purine nucleoside phosphorylase-like isoform X2 [Bombyx mori]			50	BGIBMGA000336	gi|290563241|ref|NP_001166717.1| cuticular protein RR-1 motif 34 precursor [Bombyx mori] gi|223671170|tpd|FAA00537.1| TPA: putative cuticle protein [Bombyx mori]
43	bmlnct_1109	NA			50	BGIBMGA000504	gi|91079538|ref|XP_970846.1| PREDICTED: similar to ZK899.2 [Tribolium castaneum]
44	BGIBMGA006415	gi|112982938|ref|NP_001037099.1| chorion b-ZIP transcription factor [Bombyx mori] gi|54401523|gb|AAV34566.1| chorion b-ZIP transcription factor [Bombyx mori]			50	BGIBMGA000505	gi|108872502|gb|EAT36727.1| AAEL011213-PA [Aedes aegypti]
44	BGIBMGA012399	gi|112983008|ref|NP_001037592.1| sorbitol dehydrogenase [Bombyx mori] gi|108860581|dbj|BAE95831.1| sorbitol dehydrogenase-2 [Bombyx mori]			50	BGIBMGA001092	gi|108869666|gb|EAT33891.1| AAEL013840-PA [Aedes aegypti]
44	BGIBMGA007553	gi|148298782|ref|NP_001091747.1| C-type lectin 16 precursor [Bombyx mori] gi|114796717|gb|ABI79325.1| C-type lectin [Bombyx mori]			50	BGIBMGA001147	gi|512913984|ref|XP_004928028.1| PREDICTED: facilitated trehalose transporter Tret1-like [Bombyx mori]
44	BGIBMGA002259	gi|148298826|ref|NP_001091813.1| myosin regulatory light chain 2 [Bombyx mori] gi|122119463|sp|Q1HPS0.1|MLR_BOMMO RecName: Full=Myosin regulatory light chain 2; Short=MLC-2 gi|95102960|gb|ABF51421.1| myosin light chain 2 [Bombyx mori] gi|163963296|gb|ABY50568.1| myosin light chain 2 [Bombyx mandarina] gi|194371731|gb|ACF59735.1| myosin light chain 2 [Bombyx mori] gi|206114239|gb|ACI05250.1| myosi…			50	BGIBMGA001237	gi|512913498|ref|XP_004927911.1| PREDICTED: branched-chain-amino-acid aminotransferase, cytosolic-like [Bombyx mori]
44	BGIBMGA014226	gi|340718034|ref|XP_003397477.1| PREDICTED: myosin heavy chain, muscle-like isoform 2 [Bombus terrestris]			50	BGIBMGA001337	gi|379699038|ref|NP_001243993.1| UDP-glycosyltransferase UGT41A1 precursor [Bombyx mori] gi|363896182|gb|AEW43175.1| UDP-glycosyltransferase UGT41A1 [Bombyx mori]
44	BGIBMGA012864	gi|379698954|ref|NP_001243949.1| peptidoglycan recognition protein precursor [Bombyx mori] gi|355398229|gb|AER70118.1| peptidoglycan recognition protein [Bombyx mori]			50	BGIBMGA001338	gi|379699038|ref|NP_001243993.1| UDP-glycosyltransferase UGT41A1 precursor [Bombyx mori] gi|363896182|gb|AEW43175.1| UDP-glycosyltransferase UGT41A1 [Bombyx mori]
44	BGIBMGA004894	gi|389610783|dbj|BAM19002.1| fau protein [Papilio polytes]			50	BGIBMGA001910	gi|512936257|ref|XP_004933474.1| PREDICTED: diuretic hormone receptor-like [Bombyx mori]
44	BGIBMGA004893	gi|390178515|ref|XP_001359095.3| GA19674, isoform F [Drosophila pseudoobscura pseudoobscura] gi|388859475|gb|EAL28238.3| GA19674, isoform F [Drosophila pseudoobscura pseudoobscura]			50	BGIBMGA004595	gi|512894745|ref|XP_004923503.1| PREDICTED: putative hexokinase HKDC1-like [Bombyx mori]
44	BGIBMGA013416	gi|512895171|ref|XP_004923608.1| PREDICTED: filamin-A-like [Bombyx mori]			50	BGIBMGA005582	gi|379698900|ref|NP_001243921.1| SOCS2-12 protein [Bombyx mori] gi|326632043|gb|ADZ99024.1| SOCS2-12 [Bombyx mori]
44	BGIBMGA005789	gi|512896255|ref|XP_004923868.1| PREDICTED: transmembrane protein 205-like [Bombyx mori]			50	BGIBMGA006213	gi|389608119|dbj|BAM17671.1| chitin deacetylase 1 [Papilio xuthus]
44	BGIBMGA007338	gi|512896816|ref|XP_004924001.1| PREDICTED: aquaporin-12A-like [Bombyx mori]			50	BGIBMGA006214	gi|160333138|ref|NP_001103795.1| very low-density lipoprotein receptor isoform 1 precursor [Bombyx mori] gi|95102594|gb|ABF51235.1| very low-density lipoprotein receptor precursor isoform 1 [Bombyx mori] gi|308228544|gb|ADO24153.1| chitin deacetylase 1 [Bombyx mori]
44	BGIBMGA007339	gi|512896816|ref|XP_004924001.1| PREDICTED: aquaporin-12A-like [Bombyx mori]			50	BGIBMGA007144	gi|195963353|ref|NP_001124349.1| 3-hydroxyisobutyrate dehydrogenase [Bombyx mori] gi|189345326|gb|ACD92999.1| 3-hydroxyisobutyrate dehydrogenase [Bombyx mori]
44	BGIBMGA012526	gi|512901813|ref|XP_004925227.1| PREDICTED: alanine--glyoxylate aminotransferase 2-like [Bombyx mori]			50	BGIBMGA007319	gi|512912184|ref|XP_004927594.1| PREDICTED: mitochondrial uncoupling protein 4-like isoform X1 [Bombyx mori]
44	BGIBMGA001008	gi|512913049|ref|XP_004927805.1| PREDICTED: monocarboxylate transporter 9-like [Bombyx mori]			50	BGIBMGA007651	gi|512916502|ref|XP_004928656.1| PREDICTED: tenascin-like, partial [Bombyx mori]
44	BGIBMGA001277	gi|512914289|ref|XP_004928105.1| PREDICTED: cytochrome P450 CYP12A2-like [Bombyx mori]			50	BGIBMGA007899	gi|512916360|ref|XP_004928622.1| PREDICTED: probable chitinase 3-like [Bombyx mori]
44	BGIBMGA006032	gi|512918574|ref|XP_004929167.1| PREDICTED: adenylate kinase isoenzyme 1-like isoform X1 [Bombyx mori]			50	BGIBMGA010742	gi|512934721|ref|XP_004933101.1| PREDICTED: facilitated trehalose transporter Tret1-like [Bombyx mori]
44	BGIBMGA006510	gi|512924481|ref|XP_004930606.1| PREDICTED: myosin light chain alkali-like isoform X1 [Bombyx mori]			50	BGIBMGA011834	gi|114051463|ref|NP_001040364.1| methionine sulfoxide reductase [Bombyx mori] gi|95102640|gb|ABF51258.1| methionine sulfoxide reductase [Bombyx mori]
44	BGIBMGA005345	gi|512930762|ref|XP_004932140.1| PREDICTED: calcium-binding protein E63-1-like isoform X1 [Bombyx mori] gi|512930766|ref|XP_004932141.1| PREDICTED: calcium-binding protein E63-1-like isoform X2 [Bombyx mori]			50	BGIBMGA012132	gi|512934129|ref|XP_004932959.1| PREDICTED: sodium-coupled monocarboxylate transporter 2-like [Bombyx mori]
44	BGIBMGA002660	gi|512931571|ref|XP_004932336.1| PREDICTED: myrosinase 1-like [Bombyx mori]			50	BGIBMGA012521	gi|512911868|ref|XP_004927517.1| PREDICTED: venom allergen 5-like [Bombyx mori]
44	BGIBMGA011440	gi|512933046|ref|XP_004932694.1| PREDICTED: uncharacterized protein LOC101739051 isoform X1 [Bombyx mori]			50	BGIBMGA012887	gi|512917329|ref|XP_004928861.1| PREDICTED: alpha-tocopherol transfer protein-like [Bombyx mori]
44	BGIBMGA003682	gi|585087537|gb|AHJ26004.1| YKI3, partial [Bombyx mori]			50	BGIBMGA013924	gi|512936495|ref|XP_004933533.1| PREDICTED: vanin-like protein 3-like [Bombyx mori]
44	bmlnct_1109	NA			51	BGIBMGA000505	gi|108872502|gb|EAT36727.1| AAEL011213-PA [Aedes aegypti]
45	BGIBMGA006415	gi|112982938|ref|NP_001037099.1| chorion b-ZIP transcription factor [Bombyx mori] gi|54401523|gb|AAV34566.1| chorion b-ZIP transcription factor [Bombyx mori]			51	BGIBMGA001147	gi|512913984|ref|XP_004928028.1| PREDICTED: facilitated trehalose transporter Tret1-like [Bombyx mori]
45	BGIBMGA012399	gi|112983008|ref|NP_001037592.1| sorbitol dehydrogenase [Bombyx mori] gi|108860581|dbj|BAE95831.1| sorbitol dehydrogenase-2 [Bombyx mori]			51	BGIBMGA001150	gi|512913070|ref|XP_004927808.1| PREDICTED: proton-coupled amino acid transporter 1-like [Bombyx mori]
45	BGIBMGA007553	gi|148298782|ref|NP_001091747.1| C-type lectin 16 precursor [Bombyx mori] gi|114796717|gb|ABI79325.1| C-type lectin [Bombyx mori]			51	BGIBMGA001237	gi|512913498|ref|XP_004927911.1| PREDICTED: branched-chain-amino-acid aminotransferase, cytosolic-like [Bombyx mori]
45	BGIBMGA002259	gi|148298826|ref|NP_001091813.1| myosin regulatory light chain 2 [Bombyx mori] gi|122119463|sp|Q1HPS0.1|MLR_BOMMO RecName: Full=Myosin regulatory light chain 2; Short=MLC-2 gi|95102960|gb|ABF51421.1| myosin light chain 2 [Bombyx mori] gi|163963296|gb|ABY50568.1| myosin light chain 2 [Bombyx mandarina] gi|194371731|gb|ACF59735.1| myosin light chain 2 [Bombyx mori] gi|206114239|gb|ACI05250.1| myosi…			51	BGIBMGA001337	gi|379699038|ref|NP_001243993.1| UDP-glycosyltransferase UGT41A1 precursor [Bombyx mori] gi|363896182|gb|AEW43175.1| UDP-glycosyltransferase UGT41A1 [Bombyx mori]
45	BGIBMGA014226	gi|340718034|ref|XP_003397477.1| PREDICTED: myosin heavy chain, muscle-like isoform 2 [Bombus terrestris]			51	BGIBMGA001338	gi|379699038|ref|NP_001243993.1| UDP-glycosyltransferase UGT41A1 precursor [Bombyx mori] gi|363896182|gb|AEW43175.1| UDP-glycosyltransferase UGT41A1 [Bombyx mori]
45	BGIBMGA012864	gi|379698954|ref|NP_001243949.1| peptidoglycan recognition protein precursor [Bombyx mori] gi|355398229|gb|AER70118.1| peptidoglycan recognition protein [Bombyx mori]			51	BGIBMGA001910	gi|512936257|ref|XP_004933474.1| PREDICTED: diuretic hormone receptor-like [Bombyx mori]
45	BGIBMGA004894	gi|389610783|dbj|BAM19002.1| fau protein [Papilio polytes]			51	BGIBMGA003044	gi|512926303|ref|XP_004931052.1| PREDICTED: myosin-VIIa-like [Bombyx mori]
45	BGIBMGA004893	gi|390178515|ref|XP_001359095.3| GA19674, isoform F [Drosophila pseudoobscura pseudoobscura] gi|388859475|gb|EAL28238.3| GA19674, isoform F [Drosophila pseudoobscura pseudoobscura]			51	BGIBMGA004595	gi|512894745|ref|XP_004923503.1| PREDICTED: putative hexokinase HKDC1-like [Bombyx mori]
45	BGIBMGA013416	gi|512895171|ref|XP_004923608.1| PREDICTED: filamin-A-like [Bombyx mori]			51	BGIBMGA005227	gi|357625827|gb|EHJ76132.1| putative abc transporter [Danaus plexippus]
45	BGIBMGA005789	gi|512896255|ref|XP_004923868.1| PREDICTED: transmembrane protein 205-like [Bombyx mori]			51	BGIBMGA006213	gi|389608119|dbj|BAM17671.1| chitin deacetylase 1 [Papilio xuthus]
45	BGIBMGA007338	gi|512896816|ref|XP_004924001.1| PREDICTED: aquaporin-12A-like [Bombyx mori]			51	BGIBMGA006214	gi|160333138|ref|NP_001103795.1| very low-density lipoprotein receptor isoform 1 precursor [Bombyx mori] gi|95102594|gb|ABF51235.1| very low-density lipoprotein receptor precursor isoform 1 [Bombyx mori] gi|308228544|gb|ADO24153.1| chitin deacetylase 1 [Bombyx mori]
45	BGIBMGA007339	gi|512896816|ref|XP_004924001.1| PREDICTED: aquaporin-12A-like [Bombyx mori]			51	BGIBMGA007144	gi|195963353|ref|NP_001124349.1| 3-hydroxyisobutyrate dehydrogenase [Bombyx mori] gi|189345326|gb|ACD92999.1| 3-hydroxyisobutyrate dehydrogenase [Bombyx mori]
45	BGIBMGA012491	gi|512896871|ref|XP_004924015.1| PREDICTED: fatty-acid amide hydrolase 2-like isoform X1 [Bombyx mori]			51	BGIBMGA007651	gi|512916502|ref|XP_004928656.1| PREDICTED: tenascin-like, partial [Bombyx mori]
45	BGIBMGA012526	gi|512901813|ref|XP_004925227.1| PREDICTED: alanine--glyoxylate aminotransferase 2-like [Bombyx mori]			51	BGIBMGA007677	gi|114052326|ref|NP_001040470.1| gasp precursor [Bombyx mori] gi|95103030|gb|ABF51456.1| gasp precursor [Bombyx mori]
45	BGIBMGA001008	gi|512913049|ref|XP_004927805.1| PREDICTED: monocarboxylate transporter 9-like [Bombyx mori]			51	BGIBMGA007678	gi|512916372|ref|XP_004928625.1| PREDICTED: probable chitinase 3-like [Bombyx mori]
45	BGIBMGA001277	gi|512914289|ref|XP_004928105.1| PREDICTED: cytochrome P450 CYP12A2-like [Bombyx mori]			51	BGIBMGA007899	gi|512916360|ref|XP_004928622.1| PREDICTED: probable chitinase 3-like [Bombyx mori]
45	BGIBMGA006032	gi|512918574|ref|XP_004929167.1| PREDICTED: adenylate kinase isoenzyme 1-like isoform X1 [Bombyx mori]			51	BGIBMGA010240	gi|10119784|dbj|BAB13481.1| chitinase precursor [Bombyx mori]
45	BGIBMGA006510	gi|512924481|ref|XP_004930606.1| PREDICTED: myosin light chain alkali-like isoform X1 [Bombyx mori]			51	BGIBMGA010742	gi|512934721|ref|XP_004933101.1| PREDICTED: facilitated trehalose transporter Tret1-like [Bombyx mori]
45	BGIBMGA005345	gi|512930762|ref|XP_004932140.1| PREDICTED: calcium-binding protein E63-1-like isoform X1 [Bombyx mori] gi|512930766|ref|XP_004932141.1| PREDICTED: calcium-binding protein E63-1-like isoform X2 [Bombyx mori]			51	BGIBMGA010837	gi|512934567|ref|XP_004933064.1| PREDICTED: equilibrative nucleoside transporter 2-like [Bombyx mori]
45	BGIBMGA002660	gi|512931571|ref|XP_004932336.1| PREDICTED: myrosinase 1-like [Bombyx mori]			51	BGIBMGA011601	gi|512928590|ref|XP_004931615.1| PREDICTED: alanine--glyoxylate aminotransferase 2, mitochondrial-like [Bombyx mori]
45	BGIBMGA003682	gi|585087537|gb|AHJ26004.1| YKI3, partial [Bombyx mori]			51	BGIBMGA011834	gi|114051463|ref|NP_001040364.1| methionine sulfoxide reductase [Bombyx mori] gi|95102640|gb|ABF51258.1| methionine sulfoxide reductase [Bombyx mori]
45	bmlnct_1109	NA			51	BGIBMGA012132	gi|512934129|ref|XP_004932959.1| PREDICTED: sodium-coupled monocarboxylate transporter 2-like [Bombyx mori]
46	BGIBMGA006415	gi|112982938|ref|NP_001037099.1| chorion b-ZIP transcription factor [Bombyx mori] gi|54401523|gb|AAV34566.1| chorion b-ZIP transcription factor [Bombyx mori]			51	BGIBMGA012502	gi|512896938|ref|XP_004924031.1| PREDICTED: LOW QUALITY PROTEIN: putative sodium-dependent multivitamin transporter-like [Bombyx mori]
46	BGIBMGA012399	gi|112983008|ref|NP_001037592.1| sorbitol dehydrogenase [Bombyx mori] gi|108860581|dbj|BAE95831.1| sorbitol dehydrogenase-2 [Bombyx mori]			51	BGIBMGA012968	gi|306518642|ref|NP_001182383.1| Bm8 interacting protein 2d-4 precursor [Bombyx mori] gi|296040408|dbj|BAJ07616.1| Bm8 interacting protein 2d-4 [Bombyx mori]
46	BGIBMGA007553	gi|148298782|ref|NP_001091747.1| C-type lectin 16 precursor [Bombyx mori] gi|114796717|gb|ABI79325.1| C-type lectin [Bombyx mori]			51	BGIBMGA013924	gi|512936495|ref|XP_004933533.1| PREDICTED: vanin-like protein 3-like [Bombyx mori]
46	BGIBMGA002259	gi|148298826|ref|NP_001091813.1| myosin regulatory light chain 2 [Bombyx mori] gi|122119463|sp|Q1HPS0.1|MLR_BOMMO RecName: Full=Myosin regulatory light chain 2; Short=MLC-2 gi|95102960|gb|ABF51421.1| myosin light chain 2 [Bombyx mori] gi|163963296|gb|ABY50568.1| myosin light chain 2 [Bombyx mandarina] gi|194371731|gb|ACF59735.1| myosin light chain 2 [Bombyx mori] gi|206114239|gb|ACI05250.1| myosi…			51	CA946002	NA
46	BGIBMGA014226	gi|340718034|ref|XP_003397477.1| PREDICTED: myosin heavy chain, muscle-like isoform 2 [Bombus terrestris]			52	BGIBMGA000336	gi|290563241|ref|NP_001166717.1| cuticular protein RR-1 motif 34 precursor [Bombyx mori] gi|223671170|tpd|FAA00537.1| TPA: putative cuticle protein [Bombyx mori]
46	BGIBMGA012864	gi|379698954|ref|NP_001243949.1| peptidoglycan recognition protein precursor [Bombyx mori] gi|355398229|gb|AER70118.1| peptidoglycan recognition protein [Bombyx mori]			52	BGIBMGA000381	gi|114052643|ref|NP_001040262.1| nuclear migration protein nudC [Bombyx mori] gi|87248553|gb|ABD36329.1| nuclear migration protein nudC [Bombyx mori]
46	BGIBMGA004894	gi|389610783|dbj|BAM19002.1| fau protein [Papilio polytes]			52	BGIBMGA000504	gi|91079538|ref|XP_970846.1| PREDICTED: similar to ZK899.2 [Tribolium castaneum]
46	BGIBMGA004893	gi|390178515|ref|XP_001359095.3| GA19674, isoform F [Drosophila pseudoobscura pseudoobscura] gi|388859475|gb|EAL28238.3| GA19674, isoform F [Drosophila pseudoobscura pseudoobscura]			52	BGIBMGA000505	gi|108872502|gb|EAT36727.1| AAEL011213-PA [Aedes aegypti]
46	BGIBMGA013228	gi|512891843|ref|XP_004922783.1| PREDICTED: bicaudal D-related protein homolog [Bombyx mori]			52	BGIBMGA001092	gi|108869666|gb|EAT33891.1| AAEL013840-PA [Aedes aegypti]
46	BGIBMGA013416	gi|512895171|ref|XP_004923608.1| PREDICTED: filamin-A-like [Bombyx mori]			52	BGIBMGA001147	gi|512913984|ref|XP_004928028.1| PREDICTED: facilitated trehalose transporter Tret1-like [Bombyx mori]
46	BGIBMGA007338	gi|512896816|ref|XP_004924001.1| PREDICTED: aquaporin-12A-like [Bombyx mori]			52	BGIBMGA001150	gi|512913070|ref|XP_004927808.1| PREDICTED: proton-coupled amino acid transporter 1-like [Bombyx mori]
46	BGIBMGA007339	gi|512896816|ref|XP_004924001.1| PREDICTED: aquaporin-12A-like [Bombyx mori]			52	BGIBMGA001237	gi|512913498|ref|XP_004927911.1| PREDICTED: branched-chain-amino-acid aminotransferase, cytosolic-like [Bombyx mori]
46	BGIBMGA012526	gi|512901813|ref|XP_004925227.1| PREDICTED: alanine--glyoxylate aminotransferase 2-like [Bombyx mori]			52	BGIBMGA001337	gi|379699038|ref|NP_001243993.1| UDP-glycosyltransferase UGT41A1 precursor [Bombyx mori] gi|363896182|gb|AEW43175.1| UDP-glycosyltransferase UGT41A1 [Bombyx mori]
46	BGIBMGA009977	gi|512907406|ref|XP_004926434.1| PREDICTED: PDZ and LIM domain protein 3-like isoform X3 [Bombyx mori]			52	BGIBMGA001338	gi|379699038|ref|NP_001243993.1| UDP-glycosyltransferase UGT41A1 precursor [Bombyx mori] gi|363896182|gb|AEW43175.1| UDP-glycosyltransferase UGT41A1 [Bombyx mori]
46	BGIBMGA001008	gi|512913049|ref|XP_004927805.1| PREDICTED: monocarboxylate transporter 9-like [Bombyx mori]			52	BGIBMGA001910	gi|512936257|ref|XP_004933474.1| PREDICTED: diuretic hormone receptor-like [Bombyx mori]
46	BGIBMGA006032	gi|512918574|ref|XP_004929167.1| PREDICTED: adenylate kinase isoenzyme 1-like isoform X1 [Bombyx mori]			52	BGIBMGA004595	gi|512894745|ref|XP_004923503.1| PREDICTED: putative hexokinase HKDC1-like [Bombyx mori]
46	BGIBMGA006510	gi|512924481|ref|XP_004930606.1| PREDICTED: myosin light chain alkali-like isoform X1 [Bombyx mori]			52	BGIBMGA006213	gi|389608119|dbj|BAM17671.1| chitin deacetylase 1 [Papilio xuthus]
46	BGIBMGA005345	gi|512930762|ref|XP_004932140.1| PREDICTED: calcium-binding protein E63-1-like isoform X1 [Bombyx mori] gi|512930766|ref|XP_004932141.1| PREDICTED: calcium-binding protein E63-1-like isoform X2 [Bombyx mori]			52	BGIBMGA006214	gi|160333138|ref|NP_001103795.1| very low-density lipoprotein receptor isoform 1 precursor [Bombyx mori] gi|95102594|gb|ABF51235.1| very low-density lipoprotein receptor precursor isoform 1 [Bombyx mori] gi|308228544|gb|ADO24153.1| chitin deacetylase 1 [Bombyx mori]
46	BGIBMGA002660	gi|512931571|ref|XP_004932336.1| PREDICTED: myrosinase 1-like [Bombyx mori]			52	BGIBMGA007144	gi|195963353|ref|NP_001124349.1| 3-hydroxyisobutyrate dehydrogenase [Bombyx mori] gi|189345326|gb|ACD92999.1| 3-hydroxyisobutyrate dehydrogenase [Bombyx mori]
46	BGIBMGA011440	gi|512933046|ref|XP_004932694.1| PREDICTED: uncharacterized protein LOC101739051 isoform X1 [Bombyx mori]			52	BGIBMGA007319	gi|512912184|ref|XP_004927594.1| PREDICTED: mitochondrial uncoupling protein 4-like isoform X1 [Bombyx mori]
46	BGIBMGA003682	gi|585087537|gb|AHJ26004.1| YKI3, partial [Bombyx mori]			52	BGIBMGA007651	gi|512916502|ref|XP_004928656.1| PREDICTED: tenascin-like, partial [Bombyx mori]
46	BGIBMGA013644	no hints			52	BGIBMGA007677	gi|114052326|ref|NP_001040470.1| gasp precursor [Bombyx mori] gi|95103030|gb|ABF51456.1| gasp precursor [Bombyx mori]
46	bmlnct_1109	NA			52	BGIBMGA007678	gi|512916372|ref|XP_004928625.1| PREDICTED: probable chitinase 3-like [Bombyx mori]
47	BGIBMGA006415	gi|112982938|ref|NP_001037099.1| chorion b-ZIP transcription factor [Bombyx mori] gi|54401523|gb|AAV34566.1| chorion b-ZIP transcription factor [Bombyx mori]			52	BGIBMGA007899	gi|512916360|ref|XP_004928622.1| PREDICTED: probable chitinase 3-like [Bombyx mori]
47	BGIBMGA012399	gi|112983008|ref|NP_001037592.1| sorbitol dehydrogenase [Bombyx mori] gi|108860581|dbj|BAE95831.1| sorbitol dehydrogenase-2 [Bombyx mori]			52	BGIBMGA010742	gi|512934721|ref|XP_004933101.1| PREDICTED: facilitated trehalose transporter Tret1-like [Bombyx mori]
47	BGIBMGA007553	gi|148298782|ref|NP_001091747.1| C-type lectin 16 precursor [Bombyx mori] gi|114796717|gb|ABI79325.1| C-type lectin [Bombyx mori]			52	BGIBMGA011601	gi|512928590|ref|XP_004931615.1| PREDICTED: alanine--glyoxylate aminotransferase 2, mitochondrial-like [Bombyx mori]
47	BGIBMGA002259	gi|148298826|ref|NP_001091813.1| myosin regulatory light chain 2 [Bombyx mori] gi|122119463|sp|Q1HPS0.1|MLR_BOMMO RecName: Full=Myosin regulatory light chain 2; Short=MLC-2 gi|95102960|gb|ABF51421.1| myosin light chain 2 [Bombyx mori] gi|163963296|gb|ABY50568.1| myosin light chain 2 [Bombyx mandarina] gi|194371731|gb|ACF59735.1| myosin light chain 2 [Bombyx mori] gi|206114239|gb|ACI05250.1| myosi…			52	BGIBMGA011834	gi|114051463|ref|NP_001040364.1| methionine sulfoxide reductase [Bombyx mori] gi|95102640|gb|ABF51258.1| methionine sulfoxide reductase [Bombyx mori]
47	BGIBMGA014226	gi|340718034|ref|XP_003397477.1| PREDICTED: myosin heavy chain, muscle-like isoform 2 [Bombus terrestris]			52	BGIBMGA012132	gi|512934129|ref|XP_004932959.1| PREDICTED: sodium-coupled monocarboxylate transporter 2-like [Bombyx mori]
47	BGIBMGA006937	gi|357625725|gb|EHJ76074.1| troponin C [Danaus plexippus]			52	BGIBMGA013729	gi|512907213|ref|XP_004926386.1| PREDICTED: proton myo-inositol cotransporter-like [Bombyx mori]
47	BGIBMGA012864	gi|379698954|ref|NP_001243949.1| peptidoglycan recognition protein precursor [Bombyx mori] gi|355398229|gb|AER70118.1| peptidoglycan recognition protein [Bombyx mori]			52	BGIBMGA013924	gi|512936495|ref|XP_004933533.1| PREDICTED: vanin-like protein 3-like [Bombyx mori]
47	BGIBMGA004894	gi|389610783|dbj|BAM19002.1| fau protein [Papilio polytes]			53	BGIBMGA000381	gi|114052643|ref|NP_001040262.1| nuclear migration protein nudC [Bombyx mori] gi|87248553|gb|ABD36329.1| nuclear migration protein nudC [Bombyx mori]
47	BGIBMGA004893	gi|390178515|ref|XP_001359095.3| GA19674, isoform F [Drosophila pseudoobscura pseudoobscura] gi|388859475|gb|EAL28238.3| GA19674, isoform F [Drosophila pseudoobscura pseudoobscura]			53	BGIBMGA000504	gi|91079538|ref|XP_970846.1| PREDICTED: similar to ZK899.2 [Tribolium castaneum]
47	BGIBMGA013228	gi|512891843|ref|XP_004922783.1| PREDICTED: bicaudal D-related protein homolog [Bombyx mori]			53	BGIBMGA000505	gi|108872502|gb|EAT36727.1| AAEL011213-PA [Aedes aegypti]
47	BGIBMGA013416	gi|512895171|ref|XP_004923608.1| PREDICTED: filamin-A-like [Bombyx mori]			53	BGIBMGA001092	gi|108869666|gb|EAT33891.1| AAEL013840-PA [Aedes aegypti]
47	BGIBMGA007338	gi|512896816|ref|XP_004924001.1| PREDICTED: aquaporin-12A-like [Bombyx mori]			53	BGIBMGA001147	gi|512913984|ref|XP_004928028.1| PREDICTED: facilitated trehalose transporter Tret1-like [Bombyx mori]
47	BGIBMGA007339	gi|512896816|ref|XP_004924001.1| PREDICTED: aquaporin-12A-like [Bombyx mori]			53	BGIBMGA001150	gi|512913070|ref|XP_004927808.1| PREDICTED: proton-coupled amino acid transporter 1-like [Bombyx mori]
47	BGIBMGA012526	gi|512901813|ref|XP_004925227.1| PREDICTED: alanine--glyoxylate aminotransferase 2-like [Bombyx mori]			53	BGIBMGA001237	gi|512913498|ref|XP_004927911.1| PREDICTED: branched-chain-amino-acid aminotransferase, cytosolic-like [Bombyx mori]
47	BGIBMGA009977	gi|512907406|ref|XP_004926434.1| PREDICTED: PDZ and LIM domain protein 3-like isoform X3 [Bombyx mori]			53	BGIBMGA001337	gi|379699038|ref|NP_001243993.1| UDP-glycosyltransferase UGT41A1 precursor [Bombyx mori] gi|363896182|gb|AEW43175.1| UDP-glycosyltransferase UGT41A1 [Bombyx mori]
47	BGIBMGA001008	gi|512913049|ref|XP_004927805.1| PREDICTED: monocarboxylate transporter 9-like [Bombyx mori]			53	BGIBMGA001338	gi|379699038|ref|NP_001243993.1| UDP-glycosyltransferase UGT41A1 precursor [Bombyx mori] gi|363896182|gb|AEW43175.1| UDP-glycosyltransferase UGT41A1 [Bombyx mori]
47	BGIBMGA006032	gi|512918574|ref|XP_004929167.1| PREDICTED: adenylate kinase isoenzyme 1-like isoform X1 [Bombyx mori]			53	BGIBMGA001910	gi|512936257|ref|XP_004933474.1| PREDICTED: diuretic hormone receptor-like [Bombyx mori]
47	BGIBMGA006510	gi|512924481|ref|XP_004930606.1| PREDICTED: myosin light chain alkali-like isoform X1 [Bombyx mori]			53	BGIBMGA003044	gi|512926303|ref|XP_004931052.1| PREDICTED: myosin-VIIa-like [Bombyx mori]
47	BGIBMGA002660	gi|512931571|ref|XP_004932336.1| PREDICTED: myrosinase 1-like [Bombyx mori]			53	BGIBMGA004595	gi|512894745|ref|XP_004923503.1| PREDICTED: putative hexokinase HKDC1-like [Bombyx mori]
47	BGIBMGA011440	gi|512933046|ref|XP_004932694.1| PREDICTED: uncharacterized protein LOC101739051 isoform X1 [Bombyx mori]			53	BGIBMGA005227	gi|357625827|gb|EHJ76132.1| putative abc transporter [Danaus plexippus]
47	BGIBMGA013644	no hints			53	BGIBMGA006213	gi|389608119|dbj|BAM17671.1| chitin deacetylase 1 [Papilio xuthus]
47	bmlnct_1109	NA			53	BGIBMGA006214	gi|160333138|ref|NP_001103795.1| very low-density lipoprotein receptor isoform 1 precursor [Bombyx mori] gi|95102594|gb|ABF51235.1| very low-density lipoprotein receptor precursor isoform 1 [Bombyx mori] gi|308228544|gb|ADO24153.1| chitin deacetylase 1 [Bombyx mori]
48	BGIBMGA006415	gi|112982938|ref|NP_001037099.1| chorion b-ZIP transcription factor [Bombyx mori] gi|54401523|gb|AAV34566.1| chorion b-ZIP transcription factor [Bombyx mori]			53	BGIBMGA007144	gi|195963353|ref|NP_001124349.1| 3-hydroxyisobutyrate dehydrogenase [Bombyx mori] gi|189345326|gb|ACD92999.1| 3-hydroxyisobutyrate dehydrogenase [Bombyx mori]
48	BGIBMGA012399	gi|112983008|ref|NP_001037592.1| sorbitol dehydrogenase [Bombyx mori] gi|108860581|dbj|BAE95831.1| sorbitol dehydrogenase-2 [Bombyx mori]			53	BGIBMGA007319	gi|512912184|ref|XP_004927594.1| PREDICTED: mitochondrial uncoupling protein 4-like isoform X1 [Bombyx mori]
48	BGIBMGA007553	gi|148298782|ref|NP_001091747.1| C-type lectin 16 precursor [Bombyx mori] gi|114796717|gb|ABI79325.1| C-type lectin [Bombyx mori]			53	BGIBMGA007651	gi|512916502|ref|XP_004928656.1| PREDICTED: tenascin-like, partial [Bombyx mori]
48	BGIBMGA002259	gi|148298826|ref|NP_001091813.1| myosin regulatory light chain 2 [Bombyx mori] gi|122119463|sp|Q1HPS0.1|MLR_BOMMO RecName: Full=Myosin regulatory light chain 2; Short=MLC-2 gi|95102960|gb|ABF51421.1| myosin light chain 2 [Bombyx mori] gi|163963296|gb|ABY50568.1| myosin light chain 2 [Bombyx mandarina] gi|194371731|gb|ACF59735.1| myosin light chain 2 [Bombyx mori] gi|206114239|gb|ACI05250.1| myosi…			53	BGIBMGA007677	gi|114052326|ref|NP_001040470.1| gasp precursor [Bombyx mori] gi|95103030|gb|ABF51456.1| gasp precursor [Bombyx mori]
48	BGIBMGA014226	gi|340718034|ref|XP_003397477.1| PREDICTED: myosin heavy chain, muscle-like isoform 2 [Bombus terrestris]			53	BGIBMGA007678	gi|512916372|ref|XP_004928625.1| PREDICTED: probable chitinase 3-like [Bombyx mori]
48	BGIBMGA012864	gi|379698954|ref|NP_001243949.1| peptidoglycan recognition protein precursor [Bombyx mori] gi|355398229|gb|AER70118.1| peptidoglycan recognition protein [Bombyx mori]			53	BGIBMGA007899	gi|512916360|ref|XP_004928622.1| PREDICTED: probable chitinase 3-like [Bombyx mori]
48	BGIBMGA004894	gi|389610783|dbj|BAM19002.1| fau protein [Papilio polytes]			53	BGIBMGA010742	gi|512934721|ref|XP_004933101.1| PREDICTED: facilitated trehalose transporter Tret1-like [Bombyx mori]
48	BGIBMGA004893	gi|390178515|ref|XP_001359095.3| GA19674, isoform F [Drosophila pseudoobscura pseudoobscura] gi|388859475|gb|EAL28238.3| GA19674, isoform F [Drosophila pseudoobscura pseudoobscura]			53	BGIBMGA011601	gi|512928590|ref|XP_004931615.1| PREDICTED: alanine--glyoxylate aminotransferase 2, mitochondrial-like [Bombyx mori]
48	BGIBMGA013228	gi|512891843|ref|XP_004922783.1| PREDICTED: bicaudal D-related protein homolog [Bombyx mori]			53	BGIBMGA011834	gi|114051463|ref|NP_001040364.1| methionine sulfoxide reductase [Bombyx mori] gi|95102640|gb|ABF51258.1| methionine sulfoxide reductase [Bombyx mori]
48	BGIBMGA013416	gi|512895171|ref|XP_004923608.1| PREDICTED: filamin-A-like [Bombyx mori]			53	BGIBMGA012132	gi|512934129|ref|XP_004932959.1| PREDICTED: sodium-coupled monocarboxylate transporter 2-like [Bombyx mori]
48	BGIBMGA007338	gi|512896816|ref|XP_004924001.1| PREDICTED: aquaporin-12A-like [Bombyx mori]			53	BGIBMGA013729	gi|512907213|ref|XP_004926386.1| PREDICTED: proton myo-inositol cotransporter-like [Bombyx mori]
48	BGIBMGA007339	gi|512896816|ref|XP_004924001.1| PREDICTED: aquaporin-12A-like [Bombyx mori]			53	BGIBMGA013924	gi|512936495|ref|XP_004933533.1| PREDICTED: vanin-like protein 3-like [Bombyx mori]
48	BGIBMGA012526	gi|512901813|ref|XP_004925227.1| PREDICTED: alanine--glyoxylate aminotransferase 2-like [Bombyx mori]			54	BGIBMGA000336	gi|290563241|ref|NP_001166717.1| cuticular protein RR-1 motif 34 precursor [Bombyx mori] gi|223671170|tpd|FAA00537.1| TPA: putative cuticle protein [Bombyx mori]
48	BGIBMGA009977	gi|512907406|ref|XP_004926434.1| PREDICTED: PDZ and LIM domain protein 3-like isoform X3 [Bombyx mori]			54	BGIBMGA000381	gi|114052643|ref|NP_001040262.1| nuclear migration protein nudC [Bombyx mori] gi|87248553|gb|ABD36329.1| nuclear migration protein nudC [Bombyx mori]
48	BGIBMGA001008	gi|512913049|ref|XP_004927805.1| PREDICTED: monocarboxylate transporter 9-like [Bombyx mori]			54	BGIBMGA000504	gi|91079538|ref|XP_970846.1| PREDICTED: similar to ZK899.2 [Tribolium castaneum]
48	BGIBMGA006032	gi|512918574|ref|XP_004929167.1| PREDICTED: adenylate kinase isoenzyme 1-like isoform X1 [Bombyx mori]			54	BGIBMGA000505	gi|108872502|gb|EAT36727.1| AAEL011213-PA [Aedes aegypti]
48	BGIBMGA006510	gi|512924481|ref|XP_004930606.1| PREDICTED: myosin light chain alkali-like isoform X1 [Bombyx mori]			54	BGIBMGA001092	gi|108869666|gb|EAT33891.1| AAEL013840-PA [Aedes aegypti]
48	BGIBMGA005345	gi|512930762|ref|XP_004932140.1| PREDICTED: calcium-binding protein E63-1-like isoform X1 [Bombyx mori] gi|512930766|ref|XP_004932141.1| PREDICTED: calcium-binding protein E63-1-like isoform X2 [Bombyx mori]			54	BGIBMGA001147	gi|512913984|ref|XP_004928028.1| PREDICTED: facilitated trehalose transporter Tret1-like [Bombyx mori]
48	BGIBMGA002660	gi|512931571|ref|XP_004932336.1| PREDICTED: myrosinase 1-like [Bombyx mori]			54	BGIBMGA001150	gi|512913070|ref|XP_004927808.1| PREDICTED: proton-coupled amino acid transporter 1-like [Bombyx mori]
48	BGIBMGA003682	gi|585087537|gb|AHJ26004.1| YKI3, partial [Bombyx mori]			54	BGIBMGA001237	gi|512913498|ref|XP_004927911.1| PREDICTED: branched-chain-amino-acid aminotransferase, cytosolic-like [Bombyx mori]
48	BGIBMGA013644	no hints			54	BGIBMGA001337	gi|379699038|ref|NP_001243993.1| UDP-glycosyltransferase UGT41A1 precursor [Bombyx mori] gi|363896182|gb|AEW43175.1| UDP-glycosyltransferase UGT41A1 [Bombyx mori]
48	bmlnct_0499	NA			54	BGIBMGA001338	gi|379699038|ref|NP_001243993.1| UDP-glycosyltransferase UGT41A1 precursor [Bombyx mori] gi|363896182|gb|AEW43175.1| UDP-glycosyltransferase UGT41A1 [Bombyx mori]
48	bmlnct_1109	NA			54	BGIBMGA001910	gi|512936257|ref|XP_004933474.1| PREDICTED: diuretic hormone receptor-like [Bombyx mori]
49	BGIBMGA006415	gi|112982938|ref|NP_001037099.1| chorion b-ZIP transcription factor [Bombyx mori] gi|54401523|gb|AAV34566.1| chorion b-ZIP transcription factor [Bombyx mori]			54	BGIBMGA004595	gi|512894745|ref|XP_004923503.1| PREDICTED: putative hexokinase HKDC1-like [Bombyx mori]
49	BGIBMGA012399	gi|112983008|ref|NP_001037592.1| sorbitol dehydrogenase [Bombyx mori] gi|108860581|dbj|BAE95831.1| sorbitol dehydrogenase-2 [Bombyx mori]			54	BGIBMGA006213	gi|389608119|dbj|BAM17671.1| chitin deacetylase 1 [Papilio xuthus]
49	BGIBMGA007553	gi|148298782|ref|NP_001091747.1| C-type lectin 16 precursor [Bombyx mori] gi|114796717|gb|ABI79325.1| C-type lectin [Bombyx mori]			54	BGIBMGA006214	gi|160333138|ref|NP_001103795.1| very low-density lipoprotein receptor isoform 1 precursor [Bombyx mori] gi|95102594|gb|ABF51235.1| very low-density lipoprotein receptor precursor isoform 1 [Bombyx mori] gi|308228544|gb|ADO24153.1| chitin deacetylase 1 [Bombyx mori]
49	BGIBMGA002259	gi|148298826|ref|NP_001091813.1| myosin regulatory light chain 2 [Bombyx mori] gi|122119463|sp|Q1HPS0.1|MLR_BOMMO RecName: Full=Myosin regulatory light chain 2; Short=MLC-2 gi|95102960|gb|ABF51421.1| myosin light chain 2 [Bombyx mori] gi|163963296|gb|ABY50568.1| myosin light chain 2 [Bombyx mandarina] gi|194371731|gb|ACF59735.1| myosin light chain 2 [Bombyx mori] gi|206114239|gb|ACI05250.1| myosi…			54	BGIBMGA007144	gi|195963353|ref|NP_001124349.1| 3-hydroxyisobutyrate dehydrogenase [Bombyx mori] gi|189345326|gb|ACD92999.1| 3-hydroxyisobutyrate dehydrogenase [Bombyx mori]
49	BGIBMGA014226	gi|340718034|ref|XP_003397477.1| PREDICTED: myosin heavy chain, muscle-like isoform 2 [Bombus terrestris]			54	BGIBMGA007319	gi|512912184|ref|XP_004927594.1| PREDICTED: mitochondrial uncoupling protein 4-like isoform X1 [Bombyx mori]
49	BGIBMGA006937	gi|357625725|gb|EHJ76074.1| troponin C [Danaus plexippus]			54	BGIBMGA007651	gi|512916502|ref|XP_004928656.1| PREDICTED: tenascin-like, partial [Bombyx mori]
49	BGIBMGA012864	gi|379698954|ref|NP_001243949.1| peptidoglycan recognition protein precursor [Bombyx mori] gi|355398229|gb|AER70118.1| peptidoglycan recognition protein [Bombyx mori]			54	BGIBMGA007677	gi|114052326|ref|NP_001040470.1| gasp precursor [Bombyx mori] gi|95103030|gb|ABF51456.1| gasp precursor [Bombyx mori]
49	BGIBMGA004894	gi|389610783|dbj|BAM19002.1| fau protein [Papilio polytes]			54	BGIBMGA007678	gi|512916372|ref|XP_004928625.1| PREDICTED: probable chitinase 3-like [Bombyx mori]
49	BGIBMGA004893	gi|390178515|ref|XP_001359095.3| GA19674, isoform F [Drosophila pseudoobscura pseudoobscura] gi|388859475|gb|EAL28238.3| GA19674, isoform F [Drosophila pseudoobscura pseudoobscura]			54	BGIBMGA007899	gi|512916360|ref|XP_004928622.1| PREDICTED: probable chitinase 3-like [Bombyx mori]
49	BGIBMGA013228	gi|512891843|ref|XP_004922783.1| PREDICTED: bicaudal D-related protein homolog [Bombyx mori]			54	BGIBMGA010742	gi|512934721|ref|XP_004933101.1| PREDICTED: facilitated trehalose transporter Tret1-like [Bombyx mori]
49	BGIBMGA013416	gi|512895171|ref|XP_004923608.1| PREDICTED: filamin-A-like [Bombyx mori]			54	BGIBMGA011601	gi|512928590|ref|XP_004931615.1| PREDICTED: alanine--glyoxylate aminotransferase 2, mitochondrial-like [Bombyx mori]
49	BGIBMGA007338	gi|512896816|ref|XP_004924001.1| PREDICTED: aquaporin-12A-like [Bombyx mori]			54	BGIBMGA011834	gi|114051463|ref|NP_001040364.1| methionine sulfoxide reductase [Bombyx mori] gi|95102640|gb|ABF51258.1| methionine sulfoxide reductase [Bombyx mori]
49	BGIBMGA007339	gi|512896816|ref|XP_004924001.1| PREDICTED: aquaporin-12A-like [Bombyx mori]			54	BGIBMGA012132	gi|512934129|ref|XP_004932959.1| PREDICTED: sodium-coupled monocarboxylate transporter 2-like [Bombyx mori]
49	BGIBMGA012526	gi|512901813|ref|XP_004925227.1| PREDICTED: alanine--glyoxylate aminotransferase 2-like [Bombyx mori]			54	BGIBMGA012521	gi|512911868|ref|XP_004927517.1| PREDICTED: venom allergen 5-like [Bombyx mori]
49	BGIBMGA009977	gi|512907406|ref|XP_004926434.1| PREDICTED: PDZ and LIM domain protein 3-like isoform X3 [Bombyx mori]			54	BGIBMGA012887	gi|512917329|ref|XP_004928861.1| PREDICTED: alpha-tocopherol transfer protein-like [Bombyx mori]
49	BGIBMGA001008	gi|512913049|ref|XP_004927805.1| PREDICTED: monocarboxylate transporter 9-like [Bombyx mori]			54	BGIBMGA013924	gi|512936495|ref|XP_004933533.1| PREDICTED: vanin-like protein 3-like [Bombyx mori]
49	BGIBMGA006032	gi|512918574|ref|XP_004929167.1| PREDICTED: adenylate kinase isoenzyme 1-like isoform X1 [Bombyx mori]			55	BGIBMGA000505	gi|108872502|gb|EAT36727.1| AAEL011213-PA [Aedes aegypti]
49	BGIBMGA006510	gi|512924481|ref|XP_004930606.1| PREDICTED: myosin light chain alkali-like isoform X1 [Bombyx mori]			55	BGIBMGA001092	gi|108869666|gb|EAT33891.1| AAEL013840-PA [Aedes aegypti]
49	BGIBMGA002660	gi|512931571|ref|XP_004932336.1| PREDICTED: myrosinase 1-like [Bombyx mori]			55	BGIBMGA001147	gi|512913984|ref|XP_004928028.1| PREDICTED: facilitated trehalose transporter Tret1-like [Bombyx mori]
49	BGIBMGA013644	no hints			55	BGIBMGA001150	gi|512913070|ref|XP_004927808.1| PREDICTED: proton-coupled amino acid transporter 1-like [Bombyx mori]
49	bmlnct_0499	NA			55	BGIBMGA001237	gi|512913498|ref|XP_004927911.1| PREDICTED: branched-chain-amino-acid aminotransferase, cytosolic-like [Bombyx mori]
49	bmlnct_1109	NA			55	BGIBMGA001337	gi|379699038|ref|NP_001243993.1| UDP-glycosyltransferase UGT41A1 precursor [Bombyx mori] gi|363896182|gb|AEW43175.1| UDP-glycosyltransferase UGT41A1 [Bombyx mori]
50	BGIBMGA006415	gi|112982938|ref|NP_001037099.1| chorion b-ZIP transcription factor [Bombyx mori] gi|54401523|gb|AAV34566.1| chorion b-ZIP transcription factor [Bombyx mori]			55	BGIBMGA001338	gi|379699038|ref|NP_001243993.1| UDP-glycosyltransferase UGT41A1 precursor [Bombyx mori] gi|363896182|gb|AEW43175.1| UDP-glycosyltransferase UGT41A1 [Bombyx mori]
50	BGIBMGA012399	gi|112983008|ref|NP_001037592.1| sorbitol dehydrogenase [Bombyx mori] gi|108860581|dbj|BAE95831.1| sorbitol dehydrogenase-2 [Bombyx mori]			55	BGIBMGA001910	gi|512936257|ref|XP_004933474.1| PREDICTED: diuretic hormone receptor-like [Bombyx mori]
50	BGIBMGA007553	gi|148298782|ref|NP_001091747.1| C-type lectin 16 precursor [Bombyx mori] gi|114796717|gb|ABI79325.1| C-type lectin [Bombyx mori]			55	BGIBMGA003044	gi|512926303|ref|XP_004931052.1| PREDICTED: myosin-VIIa-like [Bombyx mori]
50	BGIBMGA002259	gi|148298826|ref|NP_001091813.1| myosin regulatory light chain 2 [Bombyx mori] gi|122119463|sp|Q1HPS0.1|MLR_BOMMO RecName: Full=Myosin regulatory light chain 2; Short=MLC-2 gi|95102960|gb|ABF51421.1| myosin light chain 2 [Bombyx mori] gi|163963296|gb|ABY50568.1| myosin light chain 2 [Bombyx mandarina] gi|194371731|gb|ACF59735.1| myosin light chain 2 [Bombyx mori] gi|206114239|gb|ACI05250.1| myosi…			55	BGIBMGA004595	gi|512894745|ref|XP_004923503.1| PREDICTED: putative hexokinase HKDC1-like [Bombyx mori]
50	BGIBMGA014226	gi|340718034|ref|XP_003397477.1| PREDICTED: myosin heavy chain, muscle-like isoform 2 [Bombus terrestris]			55	BGIBMGA005227	gi|357625827|gb|EHJ76132.1| putative abc transporter [Danaus plexippus]
50	BGIBMGA012864	gi|379698954|ref|NP_001243949.1| peptidoglycan recognition protein precursor [Bombyx mori] gi|355398229|gb|AER70118.1| peptidoglycan recognition protein [Bombyx mori]			55	BGIBMGA006213	gi|389608119|dbj|BAM17671.1| chitin deacetylase 1 [Papilio xuthus]
50	BGIBMGA004894	gi|389610783|dbj|BAM19002.1| fau protein [Papilio polytes]			55	BGIBMGA006214	gi|160333138|ref|NP_001103795.1| very low-density lipoprotein receptor isoform 1 precursor [Bombyx mori] gi|95102594|gb|ABF51235.1| very low-density lipoprotein receptor precursor isoform 1 [Bombyx mori] gi|308228544|gb|ADO24153.1| chitin deacetylase 1 [Bombyx mori]
50	BGIBMGA004893	gi|390178515|ref|XP_001359095.3| GA19674, isoform F [Drosophila pseudoobscura pseudoobscura] gi|388859475|gb|EAL28238.3| GA19674, isoform F [Drosophila pseudoobscura pseudoobscura]			55	BGIBMGA007144	gi|195963353|ref|NP_001124349.1| 3-hydroxyisobutyrate dehydrogenase [Bombyx mori] gi|189345326|gb|ACD92999.1| 3-hydroxyisobutyrate dehydrogenase [Bombyx mori]
50	BGIBMGA013228	gi|512891843|ref|XP_004922783.1| PREDICTED: bicaudal D-related protein homolog [Bombyx mori]			55	BGIBMGA007319	gi|512912184|ref|XP_004927594.1| PREDICTED: mitochondrial uncoupling protein 4-like isoform X1 [Bombyx mori]
50	BGIBMGA013416	gi|512895171|ref|XP_004923608.1| PREDICTED: filamin-A-like [Bombyx mori]			55	BGIBMGA007651	gi|512916502|ref|XP_004928656.1| PREDICTED: tenascin-like, partial [Bombyx mori]
50	BGIBMGA007338	gi|512896816|ref|XP_004924001.1| PREDICTED: aquaporin-12A-like [Bombyx mori]			55	BGIBMGA007677	gi|114052326|ref|NP_001040470.1| gasp precursor [Bombyx mori] gi|95103030|gb|ABF51456.1| gasp precursor [Bombyx mori]
50	BGIBMGA007339	gi|512896816|ref|XP_004924001.1| PREDICTED: aquaporin-12A-like [Bombyx mori]			55	BGIBMGA007678	gi|512916372|ref|XP_004928625.1| PREDICTED: probable chitinase 3-like [Bombyx mori]
50	BGIBMGA012526	gi|512901813|ref|XP_004925227.1| PREDICTED: alanine--glyoxylate aminotransferase 2-like [Bombyx mori]			55	BGIBMGA007899	gi|512916360|ref|XP_004928622.1| PREDICTED: probable chitinase 3-like [Bombyx mori]
50	BGIBMGA001008	gi|512913049|ref|XP_004927805.1| PREDICTED: monocarboxylate transporter 9-like [Bombyx mori]			55	BGIBMGA010240	gi|10119784|dbj|BAB13481.1| chitinase precursor [Bombyx mori]
50	BGIBMGA001277	gi|512914289|ref|XP_004928105.1| PREDICTED: cytochrome P450 CYP12A2-like [Bombyx mori]			55	BGIBMGA010742	gi|512934721|ref|XP_004933101.1| PREDICTED: facilitated trehalose transporter Tret1-like [Bombyx mori]
50	BGIBMGA006032	gi|512918574|ref|XP_004929167.1| PREDICTED: adenylate kinase isoenzyme 1-like isoform X1 [Bombyx mori]			55	BGIBMGA010837	gi|512934567|ref|XP_004933064.1| PREDICTED: equilibrative nucleoside transporter 2-like [Bombyx mori]
50	BGIBMGA006510	gi|512924481|ref|XP_004930606.1| PREDICTED: myosin light chain alkali-like isoform X1 [Bombyx mori]			55	BGIBMGA011601	gi|512928590|ref|XP_004931615.1| PREDICTED: alanine--glyoxylate aminotransferase 2, mitochondrial-like [Bombyx mori]
50	BGIBMGA005345	gi|512930762|ref|XP_004932140.1| PREDICTED: calcium-binding protein E63-1-like isoform X1 [Bombyx mori] gi|512930766|ref|XP_004932141.1| PREDICTED: calcium-binding protein E63-1-like isoform X2 [Bombyx mori]			55	BGIBMGA011834	gi|114051463|ref|NP_001040364.1| methionine sulfoxide reductase [Bombyx mori] gi|95102640|gb|ABF51258.1| methionine sulfoxide reductase [Bombyx mori]
50	BGIBMGA002660	gi|512931571|ref|XP_004932336.1| PREDICTED: myrosinase 1-like [Bombyx mori]			55	BGIBMGA012132	gi|512934129|ref|XP_004932959.1| PREDICTED: sodium-coupled monocarboxylate transporter 2-like [Bombyx mori]
50	BGIBMGA011440	gi|512933046|ref|XP_004932694.1| PREDICTED: uncharacterized protein LOC101739051 isoform X1 [Bombyx mori]			55	BGIBMGA012502	gi|512896938|ref|XP_004924031.1| PREDICTED: LOW QUALITY PROTEIN: putative sodium-dependent multivitamin transporter-like [Bombyx mori]
50	BGIBMGA003682	gi|585087537|gb|AHJ26004.1| YKI3, partial [Bombyx mori]			55	BGIBMGA012521	gi|512911868|ref|XP_004927517.1| PREDICTED: venom allergen 5-like [Bombyx mori]
50	bmlnct_1109	NA			55	BGIBMGA012968	gi|306518642|ref|NP_001182383.1| Bm8 interacting protein 2d-4 precursor [Bombyx mori] gi|296040408|dbj|BAJ07616.1| Bm8 interacting protein 2d-4 [Bombyx mori]
51	BGIBMGA012399	gi|112983008|ref|NP_001037592.1| sorbitol dehydrogenase [Bombyx mori] gi|108860581|dbj|BAE95831.1| sorbitol dehydrogenase-2 [Bombyx mori]			55	BGIBMGA013924	gi|512936495|ref|XP_004933533.1| PREDICTED: vanin-like protein 3-like [Bombyx mori]
51	BGIBMGA007553	gi|148298782|ref|NP_001091747.1| C-type lectin 16 precursor [Bombyx mori] gi|114796717|gb|ABI79325.1| C-type lectin [Bombyx mori]			56	BGIBMGA000381	gi|114052643|ref|NP_001040262.1| nuclear migration protein nudC [Bombyx mori] gi|87248553|gb|ABD36329.1| nuclear migration protein nudC [Bombyx mori]
51	BGIBMGA002259	gi|148298826|ref|NP_001091813.1| myosin regulatory light chain 2 [Bombyx mori] gi|122119463|sp|Q1HPS0.1|MLR_BOMMO RecName: Full=Myosin regulatory light chain 2; Short=MLC-2 gi|95102960|gb|ABF51421.1| myosin light chain 2 [Bombyx mori] gi|163963296|gb|ABY50568.1| myosin light chain 2 [Bombyx mandarina] gi|194371731|gb|ACF59735.1| myosin light chain 2 [Bombyx mori] gi|206114239|gb|ACI05250.1| myosi…			56	BGIBMGA000504	gi|91079538|ref|XP_970846.1| PREDICTED: similar to ZK899.2 [Tribolium castaneum]
51	BGIBMGA014226	gi|340718034|ref|XP_003397477.1| PREDICTED: myosin heavy chain, muscle-like isoform 2 [Bombus terrestris]			56	BGIBMGA000505	gi|108872502|gb|EAT36727.1| AAEL011213-PA [Aedes aegypti]
51	BGIBMGA006937	gi|357625725|gb|EHJ76074.1| troponin C [Danaus plexippus]			56	BGIBMGA001092	gi|108869666|gb|EAT33891.1| AAEL013840-PA [Aedes aegypti]
51	BGIBMGA012864	gi|379698954|ref|NP_001243949.1| peptidoglycan recognition protein precursor [Bombyx mori] gi|355398229|gb|AER70118.1| peptidoglycan recognition protein [Bombyx mori]			56	BGIBMGA001147	gi|512913984|ref|XP_004928028.1| PREDICTED: facilitated trehalose transporter Tret1-like [Bombyx mori]
51	BGIBMGA004894	gi|389610783|dbj|BAM19002.1| fau protein [Papilio polytes]			56	BGIBMGA001150	gi|512913070|ref|XP_004927808.1| PREDICTED: proton-coupled amino acid transporter 1-like [Bombyx mori]
51	BGIBMGA013228	gi|512891843|ref|XP_004922783.1| PREDICTED: bicaudal D-related protein homolog [Bombyx mori]			56	BGIBMGA001237	gi|512913498|ref|XP_004927911.1| PREDICTED: branched-chain-amino-acid aminotransferase, cytosolic-like [Bombyx mori]
51	BGIBMGA013416	gi|512895171|ref|XP_004923608.1| PREDICTED: filamin-A-like [Bombyx mori]			56	BGIBMGA001337	gi|379699038|ref|NP_001243993.1| UDP-glycosyltransferase UGT41A1 precursor [Bombyx mori] gi|363896182|gb|AEW43175.1| UDP-glycosyltransferase UGT41A1 [Bombyx mori]
51	BGIBMGA007338	gi|512896816|ref|XP_004924001.1| PREDICTED: aquaporin-12A-like [Bombyx mori]			56	BGIBMGA001338	gi|379699038|ref|NP_001243993.1| UDP-glycosyltransferase UGT41A1 precursor [Bombyx mori] gi|363896182|gb|AEW43175.1| UDP-glycosyltransferase UGT41A1 [Bombyx mori]
51	BGIBMGA007339	gi|512896816|ref|XP_004924001.1| PREDICTED: aquaporin-12A-like [Bombyx mori]			56	BGIBMGA001910	gi|512936257|ref|XP_004933474.1| PREDICTED: diuretic hormone receptor-like [Bombyx mori]
51	BGIBMGA012526	gi|512901813|ref|XP_004925227.1| PREDICTED: alanine--glyoxylate aminotransferase 2-like [Bombyx mori]			56	BGIBMGA003044	gi|512926303|ref|XP_004931052.1| PREDICTED: myosin-VIIa-like [Bombyx mori]
51	BGIBMGA004268	gi|512902337|ref|XP_004925351.1| PREDICTED: N-acetyltransferase ESCO1-like [Bombyx mori]			56	BGIBMGA004595	gi|512894745|ref|XP_004923503.1| PREDICTED: putative hexokinase HKDC1-like [Bombyx mori]
51	BGIBMGA001008	gi|512913049|ref|XP_004927805.1| PREDICTED: monocarboxylate transporter 9-like [Bombyx mori]			56	BGIBMGA005227	gi|357625827|gb|EHJ76132.1| putative abc transporter [Danaus plexippus]
51	BGIBMGA006032	gi|512918574|ref|XP_004929167.1| PREDICTED: adenylate kinase isoenzyme 1-like isoform X1 [Bombyx mori]			56	BGIBMGA006213	gi|389608119|dbj|BAM17671.1| chitin deacetylase 1 [Papilio xuthus]
51	BGIBMGA006510	gi|512924481|ref|XP_004930606.1| PREDICTED: myosin light chain alkali-like isoform X1 [Bombyx mori]			56	BGIBMGA006214	gi|160333138|ref|NP_001103795.1| very low-density lipoprotein receptor isoform 1 precursor [Bombyx mori] gi|95102594|gb|ABF51235.1| very low-density lipoprotein receptor precursor isoform 1 [Bombyx mori] gi|308228544|gb|ADO24153.1| chitin deacetylase 1 [Bombyx mori]
51	BGIBMGA002660	gi|512931571|ref|XP_004932336.1| PREDICTED: myrosinase 1-like [Bombyx mori]			56	BGIBMGA007144	gi|195963353|ref|NP_001124349.1| 3-hydroxyisobutyrate dehydrogenase [Bombyx mori] gi|189345326|gb|ACD92999.1| 3-hydroxyisobutyrate dehydrogenase [Bombyx mori]
51	BGIBMGA011440	gi|512933046|ref|XP_004932694.1| PREDICTED: uncharacterized protein LOC101739051 isoform X1 [Bombyx mori]			56	BGIBMGA007319	gi|512912184|ref|XP_004927594.1| PREDICTED: mitochondrial uncoupling protein 4-like isoform X1 [Bombyx mori]
51	bmlnct_1109	NA			56	BGIBMGA007651	gi|512916502|ref|XP_004928656.1| PREDICTED: tenascin-like, partial [Bombyx mori]
52	BGIBMGA012399	gi|112983008|ref|NP_001037592.1| sorbitol dehydrogenase [Bombyx mori] gi|108860581|dbj|BAE95831.1| sorbitol dehydrogenase-2 [Bombyx mori]			56	BGIBMGA007677	gi|114052326|ref|NP_001040470.1| gasp precursor [Bombyx mori] gi|95103030|gb|ABF51456.1| gasp precursor [Bombyx mori]
52	BGIBMGA007553	gi|148298782|ref|NP_001091747.1| C-type lectin 16 precursor [Bombyx mori] gi|114796717|gb|ABI79325.1| C-type lectin [Bombyx mori]			56	BGIBMGA007678	gi|512916372|ref|XP_004928625.1| PREDICTED: probable chitinase 3-like [Bombyx mori]
52	BGIBMGA002259	gi|148298826|ref|NP_001091813.1| myosin regulatory light chain 2 [Bombyx mori] gi|122119463|sp|Q1HPS0.1|MLR_BOMMO RecName: Full=Myosin regulatory light chain 2; Short=MLC-2 gi|95102960|gb|ABF51421.1| myosin light chain 2 [Bombyx mori] gi|163963296|gb|ABY50568.1| myosin light chain 2 [Bombyx mandarina] gi|194371731|gb|ACF59735.1| myosin light chain 2 [Bombyx mori] gi|206114239|gb|ACI05250.1| myosi…			56	BGIBMGA007899	gi|512916360|ref|XP_004928622.1| PREDICTED: probable chitinase 3-like [Bombyx mori]
52	BGIBMGA014226	gi|340718034|ref|XP_003397477.1| PREDICTED: myosin heavy chain, muscle-like isoform 2 [Bombus terrestris]			56	BGIBMGA010742	gi|512934721|ref|XP_004933101.1| PREDICTED: facilitated trehalose transporter Tret1-like [Bombyx mori]
52	BGIBMGA012864	gi|379698954|ref|NP_001243949.1| peptidoglycan recognition protein precursor [Bombyx mori] gi|355398229|gb|AER70118.1| peptidoglycan recognition protein [Bombyx mori]			56	BGIBMGA011601	gi|512928590|ref|XP_004931615.1| PREDICTED: alanine--glyoxylate aminotransferase 2, mitochondrial-like [Bombyx mori]
52	BGIBMGA004894	gi|389610783|dbj|BAM19002.1| fau protein [Papilio polytes]			56	BGIBMGA011834	gi|114051463|ref|NP_001040364.1| methionine sulfoxide reductase [Bombyx mori] gi|95102640|gb|ABF51258.1| methionine sulfoxide reductase [Bombyx mori]
52	BGIBMGA013228	gi|512891843|ref|XP_004922783.1| PREDICTED: bicaudal D-related protein homolog [Bombyx mori]			56	BGIBMGA012132	gi|512934129|ref|XP_004932959.1| PREDICTED: sodium-coupled monocarboxylate transporter 2-like [Bombyx mori]
52	BGIBMGA013416	gi|512895171|ref|XP_004923608.1| PREDICTED: filamin-A-like [Bombyx mori]			56	BGIBMGA012521	gi|512911868|ref|XP_004927517.1| PREDICTED: venom allergen 5-like [Bombyx mori]
52	BGIBMGA007338	gi|512896816|ref|XP_004924001.1| PREDICTED: aquaporin-12A-like [Bombyx mori]			56	BGIBMGA012887	gi|512917329|ref|XP_004928861.1| PREDICTED: alpha-tocopherol transfer protein-like [Bombyx mori]
52	BGIBMGA007339	gi|512896816|ref|XP_004924001.1| PREDICTED: aquaporin-12A-like [Bombyx mori]			56	BGIBMGA012968	gi|306518642|ref|NP_001182383.1| Bm8 interacting protein 2d-4 precursor [Bombyx mori] gi|296040408|dbj|BAJ07616.1| Bm8 interacting protein 2d-4 [Bombyx mori]
52	BGIBMGA012526	gi|512901813|ref|XP_004925227.1| PREDICTED: alanine--glyoxylate aminotransferase 2-like [Bombyx mori]			56	BGIBMGA013924	gi|512936495|ref|XP_004933533.1| PREDICTED: vanin-like protein 3-like [Bombyx mori]
52	BGIBMGA004268	gi|512902337|ref|XP_004925351.1| PREDICTED: N-acetyltransferase ESCO1-like [Bombyx mori]			57	BGIBMGA000381	gi|114052643|ref|NP_001040262.1| nuclear migration protein nudC [Bombyx mori] gi|87248553|gb|ABD36329.1| nuclear migration protein nudC [Bombyx mori]
52	BGIBMGA001008	gi|512913049|ref|XP_004927805.1| PREDICTED: monocarboxylate transporter 9-like [Bombyx mori]			57	BGIBMGA000504	gi|91079538|ref|XP_970846.1| PREDICTED: similar to ZK899.2 [Tribolium castaneum]
52	BGIBMGA001277	gi|512914289|ref|XP_004928105.1| PREDICTED: cytochrome P450 CYP12A2-like [Bombyx mori]			57	BGIBMGA000505	gi|108872502|gb|EAT36727.1| AAEL011213-PA [Aedes aegypti]
52	BGIBMGA006032	gi|512918574|ref|XP_004929167.1| PREDICTED: adenylate kinase isoenzyme 1-like isoform X1 [Bombyx mori]			57	BGIBMGA001092	gi|108869666|gb|EAT33891.1| AAEL013840-PA [Aedes aegypti]
52	BGIBMGA006510	gi|512924481|ref|XP_004930606.1| PREDICTED: myosin light chain alkali-like isoform X1 [Bombyx mori]			57	BGIBMGA001147	gi|512913984|ref|XP_004928028.1| PREDICTED: facilitated trehalose transporter Tret1-like [Bombyx mori]
52	BGIBMGA002660	gi|512931571|ref|XP_004932336.1| PREDICTED: myrosinase 1-like [Bombyx mori]			57	BGIBMGA001150	gi|512913070|ref|XP_004927808.1| PREDICTED: proton-coupled amino acid transporter 1-like [Bombyx mori]
52	BGIBMGA011440	gi|512933046|ref|XP_004932694.1| PREDICTED: uncharacterized protein LOC101739051 isoform X1 [Bombyx mori]			57	BGIBMGA001237	gi|512913498|ref|XP_004927911.1| PREDICTED: branched-chain-amino-acid aminotransferase, cytosolic-like [Bombyx mori]
52	BGIBMGA003682	gi|585087537|gb|AHJ26004.1| YKI3, partial [Bombyx mori]			57	BGIBMGA001337	gi|379699038|ref|NP_001243993.1| UDP-glycosyltransferase UGT41A1 precursor [Bombyx mori] gi|363896182|gb|AEW43175.1| UDP-glycosyltransferase UGT41A1 [Bombyx mori]
52	bmlnct_1109	NA			57	BGIBMGA001338	gi|379699038|ref|NP_001243993.1| UDP-glycosyltransferase UGT41A1 precursor [Bombyx mori] gi|363896182|gb|AEW43175.1| UDP-glycosyltransferase UGT41A1 [Bombyx mori]
53	BGIBMGA006415	gi|112982938|ref|NP_001037099.1| chorion b-ZIP transcription factor [Bombyx mori] gi|54401523|gb|AAV34566.1| chorion b-ZIP transcription factor [Bombyx mori]			57	BGIBMGA001910	gi|512936257|ref|XP_004933474.1| PREDICTED: diuretic hormone receptor-like [Bombyx mori]
53	BGIBMGA002721	gi|112983202|ref|NP_001037019.1| putative deoxynucleoside kinase [Bombyx mori] gi|13506751|gb|AAK28318.1|AF226281_1 putative deoxynucleoside kinase [Bombyx mori]			57	BGIBMGA002712	gi|527487133|dbj|BAN66704.1| Bm-brown protein [Bombyx mori]
53	BGIBMGA007553	gi|148298782|ref|NP_001091747.1| C-type lectin 16 precursor [Bombyx mori] gi|114796717|gb|ABI79325.1| C-type lectin [Bombyx mori]			57	BGIBMGA003044	gi|512926303|ref|XP_004931052.1| PREDICTED: myosin-VIIa-like [Bombyx mori]
53	BGIBMGA002259	gi|148298826|ref|NP_001091813.1| myosin regulatory light chain 2 [Bombyx mori] gi|122119463|sp|Q1HPS0.1|MLR_BOMMO RecName: Full=Myosin regulatory light chain 2; Short=MLC-2 gi|95102960|gb|ABF51421.1| myosin light chain 2 [Bombyx mori] gi|163963296|gb|ABY50568.1| myosin light chain 2 [Bombyx mandarina] gi|194371731|gb|ACF59735.1| myosin light chain 2 [Bombyx mori] gi|206114239|gb|ACI05250.1| myosi…			57	BGIBMGA004595	gi|512894745|ref|XP_004923503.1| PREDICTED: putative hexokinase HKDC1-like [Bombyx mori]
53	BGIBMGA014227	gi|158299190|ref|XP_319309.3| AGAP010147-PA [Anopheles gambiae str. PEST] gi|157014247|gb|EAA43613.3| AGAP010147-PA [Anopheles gambiae str. PEST]			57	BGIBMGA005227	gi|357625827|gb|EHJ76132.1| putative abc transporter [Danaus plexippus]
53	BGIBMGA014226	gi|340718034|ref|XP_003397477.1| PREDICTED: myosin heavy chain, muscle-like isoform 2 [Bombus terrestris]			57	BGIBMGA006213	gi|389608119|dbj|BAM17671.1| chitin deacetylase 1 [Papilio xuthus]
53	BGIBMGA006937	gi|357625725|gb|EHJ76074.1| troponin C [Danaus plexippus]			57	BGIBMGA006214	gi|160333138|ref|NP_001103795.1| very low-density lipoprotein receptor isoform 1 precursor [Bombyx mori] gi|95102594|gb|ABF51235.1| very low-density lipoprotein receptor precursor isoform 1 [Bombyx mori] gi|308228544|gb|ADO24153.1| chitin deacetylase 1 [Bombyx mori]
53	BGIBMGA004894	gi|389610783|dbj|BAM19002.1| fau protein [Papilio polytes]			57	BGIBMGA007144	gi|195963353|ref|NP_001124349.1| 3-hydroxyisobutyrate dehydrogenase [Bombyx mori] gi|189345326|gb|ACD92999.1| 3-hydroxyisobutyrate dehydrogenase [Bombyx mori]
53	BGIBMGA013228	gi|512891843|ref|XP_004922783.1| PREDICTED: bicaudal D-related protein homolog [Bombyx mori]			57	BGIBMGA007319	gi|512912184|ref|XP_004927594.1| PREDICTED: mitochondrial uncoupling protein 4-like isoform X1 [Bombyx mori]
53	BGIBMGA013416	gi|512895171|ref|XP_004923608.1| PREDICTED: filamin-A-like [Bombyx mori]			57	BGIBMGA007651	gi|512916502|ref|XP_004928656.1| PREDICTED: tenascin-like, partial [Bombyx mori]
53	BGIBMGA007338	gi|512896816|ref|XP_004924001.1| PREDICTED: aquaporin-12A-like [Bombyx mori]			57	BGIBMGA007677	gi|114052326|ref|NP_001040470.1| gasp precursor [Bombyx mori] gi|95103030|gb|ABF51456.1| gasp precursor [Bombyx mori]
53	BGIBMGA007339	gi|512896816|ref|XP_004924001.1| PREDICTED: aquaporin-12A-like [Bombyx mori]			57	BGIBMGA007678	gi|512916372|ref|XP_004928625.1| PREDICTED: probable chitinase 3-like [Bombyx mori]
53	BGIBMGA007546	gi|512899311|ref|XP_004924612.1| PREDICTED: esterase FE4-like [Bombyx mori]			57	BGIBMGA007899	gi|512916360|ref|XP_004928622.1| PREDICTED: probable chitinase 3-like [Bombyx mori]
53	BGIBMGA012526	gi|512901813|ref|XP_004925227.1| PREDICTED: alanine--glyoxylate aminotransferase 2-like [Bombyx mori]			57	BGIBMGA010742	gi|512934721|ref|XP_004933101.1| PREDICTED: facilitated trehalose transporter Tret1-like [Bombyx mori]
53	BGIBMGA009977	gi|512907406|ref|XP_004926434.1| PREDICTED: PDZ and LIM domain protein 3-like isoform X3 [Bombyx mori]			57	BGIBMGA010837	gi|512934567|ref|XP_004933064.1| PREDICTED: equilibrative nucleoside transporter 2-like [Bombyx mori]
53	BGIBMGA001008	gi|512913049|ref|XP_004927805.1| PREDICTED: monocarboxylate transporter 9-like [Bombyx mori]			57	BGIBMGA011458	gi|255977206|dbj|BAH97095.1| juvenile hormone binding protein [Bombyx mori]
53	BGIBMGA006032	gi|512918574|ref|XP_004929167.1| PREDICTED: adenylate kinase isoenzyme 1-like isoform X1 [Bombyx mori]			57	BGIBMGA011601	gi|512928590|ref|XP_004931615.1| PREDICTED: alanine--glyoxylate aminotransferase 2, mitochondrial-like [Bombyx mori]
53	BGIBMGA006510	gi|512924481|ref|XP_004930606.1| PREDICTED: myosin light chain alkali-like isoform X1 [Bombyx mori]			57	BGIBMGA011834	gi|114051463|ref|NP_001040364.1| methionine sulfoxide reductase [Bombyx mori] gi|95102640|gb|ABF51258.1| methionine sulfoxide reductase [Bombyx mori]
53	BGIBMGA002660	gi|512931571|ref|XP_004932336.1| PREDICTED: myrosinase 1-like [Bombyx mori]			57	BGIBMGA012132	gi|512934129|ref|XP_004932959.1| PREDICTED: sodium-coupled monocarboxylate transporter 2-like [Bombyx mori]
53	BGIBMGA013644	no hints			57	BGIBMGA012502	gi|512896938|ref|XP_004924031.1| PREDICTED: LOW QUALITY PROTEIN: putative sodium-dependent multivitamin transporter-like [Bombyx mori]
53	bmlnct_1109	NA			57	BGIBMGA012521	gi|512911868|ref|XP_004927517.1| PREDICTED: venom allergen 5-like [Bombyx mori]
54	BGIBMGA006415	gi|112982938|ref|NP_001037099.1| chorion b-ZIP transcription factor [Bombyx mori] gi|54401523|gb|AAV34566.1| chorion b-ZIP transcription factor [Bombyx mori]			57	BGIBMGA012968	gi|306518642|ref|NP_001182383.1| Bm8 interacting protein 2d-4 precursor [Bombyx mori] gi|296040408|dbj|BAJ07616.1| Bm8 interacting protein 2d-4 [Bombyx mori]
54	BGIBMGA007553	gi|148298782|ref|NP_001091747.1| C-type lectin 16 precursor [Bombyx mori] gi|114796717|gb|ABI79325.1| C-type lectin [Bombyx mori]			57	BGIBMGA013924	gi|512936495|ref|XP_004933533.1| PREDICTED: vanin-like protein 3-like [Bombyx mori]
54	BGIBMGA002259	gi|148298826|ref|NP_001091813.1| myosin regulatory light chain 2 [Bombyx mori] gi|122119463|sp|Q1HPS0.1|MLR_BOMMO RecName: Full=Myosin regulatory light chain 2; Short=MLC-2 gi|95102960|gb|ABF51421.1| myosin light chain 2 [Bombyx mori] gi|163963296|gb|ABY50568.1| myosin light chain 2 [Bombyx mandarina] gi|194371731|gb|ACF59735.1| myosin light chain 2 [Bombyx mori] gi|206114239|gb|ACI05250.1| myosi…
54	BGIBMGA014227	gi|158299190|ref|XP_319309.3| AGAP010147-PA [Anopheles gambiae str. PEST] gi|157014247|gb|EAA43613.3| AGAP010147-PA [Anopheles gambiae str. PEST]
54	BGIBMGA014226	gi|340718034|ref|XP_003397477.1| PREDICTED: myosin heavy chain, muscle-like isoform 2 [Bombus terrestris]
54	BGIBMGA006937	gi|357625725|gb|EHJ76074.1| troponin C [Danaus plexippus]
54	BGIBMGA004894	gi|389610783|dbj|BAM19002.1| fau protein [Papilio polytes]
54	BGIBMGA013228	gi|512891843|ref|XP_004922783.1| PREDICTED: bicaudal D-related protein homolog [Bombyx mori]
54	BGIBMGA013416	gi|512895171|ref|XP_004923608.1| PREDICTED: filamin-A-like [Bombyx mori]
54	BGIBMGA007338	gi|512896816|ref|XP_004924001.1| PREDICTED: aquaporin-12A-like [Bombyx mori]
54	BGIBMGA007339	gi|512896816|ref|XP_004924001.1| PREDICTED: aquaporin-12A-like [Bombyx mori]
54	BGIBMGA007546	gi|512899311|ref|XP_004924612.1| PREDICTED: esterase FE4-like [Bombyx mori]
54	BGIBMGA012526	gi|512901813|ref|XP_004925227.1| PREDICTED: alanine--glyoxylate aminotransferase 2-like [Bombyx mori]
54	BGIBMGA009977	gi|512907406|ref|XP_004926434.1| PREDICTED: PDZ and LIM domain protein 3-like isoform X3 [Bombyx mori]
54	BGIBMGA001008	gi|512913049|ref|XP_004927805.1| PREDICTED: monocarboxylate transporter 9-like [Bombyx mori]
54	BGIBMGA006032	gi|512918574|ref|XP_004929167.1| PREDICTED: adenylate kinase isoenzyme 1-like isoform X1 [Bombyx mori]
54	BGIBMGA006510	gi|512924481|ref|XP_004930606.1| PREDICTED: myosin light chain alkali-like isoform X1 [Bombyx mori]
54	BGIBMGA002660	gi|512931571|ref|XP_004932336.1| PREDICTED: myrosinase 1-like [Bombyx mori]
54	BGIBMGA008950	gi|557760292|ref|XP_005179867.1| PREDICTED: transmembrane inner ear expressed protein-like [Musca domestica]
54	BGIBMGA013644	no hints
54	bmlnct_1109	NA
55	BGIBMGA006415	gi|112982938|ref|NP_001037099.1| chorion b-ZIP transcription factor [Bombyx mori] gi|54401523|gb|AAV34566.1| chorion b-ZIP transcription factor [Bombyx mori]
55	BGIBMGA002721	gi|112983202|ref|NP_001037019.1| putative deoxynucleoside kinase [Bombyx mori] gi|13506751|gb|AAK28318.1|AF226281_1 putative deoxynucleoside kinase [Bombyx mori]
55	BGIBMGA007553	gi|148298782|ref|NP_001091747.1| C-type lectin 16 precursor [Bombyx mori] gi|114796717|gb|ABI79325.1| C-type lectin [Bombyx mori]
55	BGIBMGA002259	gi|148298826|ref|NP_001091813.1| myosin regulatory light chain 2 [Bombyx mori] gi|122119463|sp|Q1HPS0.1|MLR_BOMMO RecName: Full=Myosin regulatory light chain 2; Short=MLC-2 gi|95102960|gb|ABF51421.1| myosin light chain 2 [Bombyx mori] gi|163963296|gb|ABY50568.1| myosin light chain 2 [Bombyx mandarina] gi|194371731|gb|ACF59735.1| myosin light chain 2 [Bombyx mori] gi|206114239|gb|ACI05250.1| myosi…
55	BGIBMGA014226	gi|340718034|ref|XP_003397477.1| PREDICTED: myosin heavy chain, muscle-like isoform 2 [Bombus terrestris]
55	BGIBMGA006937	gi|357625725|gb|EHJ76074.1| troponin C [Danaus plexippus]
55	BGIBMGA012864	gi|379698954|ref|NP_001243949.1| peptidoglycan recognition protein precursor [Bombyx mori] gi|355398229|gb|AER70118.1| peptidoglycan recognition protein [Bombyx mori]
55	BGIBMGA004894	gi|389610783|dbj|BAM19002.1| fau protein [Papilio polytes]
55	BGIBMGA013228	gi|512891843|ref|XP_004922783.1| PREDICTED: bicaudal D-related protein homolog [Bombyx mori]
55	BGIBMGA013416	gi|512895171|ref|XP_004923608.1| PREDICTED: filamin-A-like [Bombyx mori]
55	BGIBMGA007338	gi|512896816|ref|XP_004924001.1| PREDICTED: aquaporin-12A-like [Bombyx mori]
55	BGIBMGA007339	gi|512896816|ref|XP_004924001.1| PREDICTED: aquaporin-12A-like [Bombyx mori]
55	BGIBMGA007546	gi|512899311|ref|XP_004924612.1| PREDICTED: esterase FE4-like [Bombyx mori]
55	BGIBMGA012526	gi|512901813|ref|XP_004925227.1| PREDICTED: alanine--glyoxylate aminotransferase 2-like [Bombyx mori]
55	BGIBMGA009977	gi|512907406|ref|XP_004926434.1| PREDICTED: PDZ and LIM domain protein 3-like isoform X3 [Bombyx mori]
55	BGIBMGA001008	gi|512913049|ref|XP_004927805.1| PREDICTED: monocarboxylate transporter 9-like [Bombyx mori]
55	BGIBMGA006032	gi|512918574|ref|XP_004929167.1| PREDICTED: adenylate kinase isoenzyme 1-like isoform X1 [Bombyx mori]
55	BGIBMGA006510	gi|512924481|ref|XP_004930606.1| PREDICTED: myosin light chain alkali-like isoform X1 [Bombyx mori]
55	BGIBMGA002660	gi|512931571|ref|XP_004932336.1| PREDICTED: myrosinase 1-like [Bombyx mori]
55	BGIBMGA013644	no hints
55	bmlnct_1109	NA
56	BGIBMGA006415	gi|112982938|ref|NP_001037099.1| chorion b-ZIP transcription factor [Bombyx mori] gi|54401523|gb|AAV34566.1| chorion b-ZIP transcription factor [Bombyx mori]
56	BGIBMGA002721	gi|112983202|ref|NP_001037019.1| putative deoxynucleoside kinase [Bombyx mori] gi|13506751|gb|AAK28318.1|AF226281_1 putative deoxynucleoside kinase [Bombyx mori]
56	BGIBMGA007553	gi|148298782|ref|NP_001091747.1| C-type lectin 16 precursor [Bombyx mori] gi|114796717|gb|ABI79325.1| C-type lectin [Bombyx mori]
56	BGIBMGA002259	gi|148298826|ref|NP_001091813.1| myosin regulatory light chain 2 [Bombyx mori] gi|122119463|sp|Q1HPS0.1|MLR_BOMMO RecName: Full=Myosin regulatory light chain 2; Short=MLC-2 gi|95102960|gb|ABF51421.1| myosin light chain 2 [Bombyx mori] gi|163963296|gb|ABY50568.1| myosin light chain 2 [Bombyx mandarina] gi|194371731|gb|ACF59735.1| myosin light chain 2 [Bombyx mori] gi|206114239|gb|ACI05250.1| myosi…
56	BGIBMGA014226	gi|340718034|ref|XP_003397477.1| PREDICTED: myosin heavy chain, muscle-like isoform 2 [Bombus terrestris]
56	BGIBMGA006937	gi|357625725|gb|EHJ76074.1| troponin C [Danaus plexippus]
56	BGIBMGA012864	gi|379698954|ref|NP_001243949.1| peptidoglycan recognition protein precursor [Bombyx mori] gi|355398229|gb|AER70118.1| peptidoglycan recognition protein [Bombyx mori]
56	BGIBMGA004894	gi|389610783|dbj|BAM19002.1| fau protein [Papilio polytes]
56	BGIBMGA013228	gi|512891843|ref|XP_004922783.1| PREDICTED: bicaudal D-related protein homolog [Bombyx mori]
56	BGIBMGA013416	gi|512895171|ref|XP_004923608.1| PREDICTED: filamin-A-like [Bombyx mori]
56	BGIBMGA007338	gi|512896816|ref|XP_004924001.1| PREDICTED: aquaporin-12A-like [Bombyx mori]
56	BGIBMGA007339	gi|512896816|ref|XP_004924001.1| PREDICTED: aquaporin-12A-like [Bombyx mori]
56	BGIBMGA012526	gi|512901813|ref|XP_004925227.1| PREDICTED: alanine--glyoxylate aminotransferase 2-like [Bombyx mori]
56	BGIBMGA009977	gi|512907406|ref|XP_004926434.1| PREDICTED: PDZ and LIM domain protein 3-like isoform X3 [Bombyx mori]
56	BGIBMGA001008	gi|512913049|ref|XP_004927805.1| PREDICTED: monocarboxylate transporter 9-like [Bombyx mori]
56	BGIBMGA006032	gi|512918574|ref|XP_004929167.1| PREDICTED: adenylate kinase isoenzyme 1-like isoform X1 [Bombyx mori]
56	BGIBMGA006510	gi|512924481|ref|XP_004930606.1| PREDICTED: myosin light chain alkali-like isoform X1 [Bombyx mori]
56	BGIBMGA002660	gi|512931571|ref|XP_004932336.1| PREDICTED: myrosinase 1-like [Bombyx mori]
56	BGIBMGA011440	gi|512933046|ref|XP_004932694.1| PREDICTED: uncharacterized protein LOC101739051 isoform X1 [Bombyx mori]
56	BGIBMGA013644	no hints
56	bmlnct_1109	NA
57	BGIBMGA006415	gi|112982938|ref|NP_001037099.1| chorion b-ZIP transcription factor [Bombyx mori] gi|54401523|gb|AAV34566.1| chorion b-ZIP transcription factor [Bombyx mori]
57	BGIBMGA007553	gi|148298782|ref|NP_001091747.1| C-type lectin 16 precursor [Bombyx mori] gi|114796717|gb|ABI79325.1| C-type lectin [Bombyx mori]
57	BGIBMGA002259	gi|148298826|ref|NP_001091813.1| myosin regulatory light chain 2 [Bombyx mori] gi|122119463|sp|Q1HPS0.1|MLR_BOMMO RecName: Full=Myosin regulatory light chain 2; Short=MLC-2 gi|95102960|gb|ABF51421.1| myosin light chain 2 [Bombyx mori] gi|163963296|gb|ABY50568.1| myosin light chain 2 [Bombyx mandarina] gi|194371731|gb|ACF59735.1| myosin light chain 2 [Bombyx mori] gi|206114239|gb|ACI05250.1| myosi…
57	BGIBMGA014226	gi|340718034|ref|XP_003397477.1| PREDICTED: myosin heavy chain, muscle-like isoform 2 [Bombus terrestris]
57	BGIBMGA006937	gi|357625725|gb|EHJ76074.1| troponin C [Danaus plexippus]
57	BGIBMGA012864	gi|379698954|ref|NP_001243949.1| peptidoglycan recognition protein precursor [Bombyx mori] gi|355398229|gb|AER70118.1| peptidoglycan recognition protein [Bombyx mori]
57	BGIBMGA004894	gi|389610783|dbj|BAM19002.1| fau protein [Papilio polytes]
57	BGIBMGA013228	gi|512891843|ref|XP_004922783.1| PREDICTED: bicaudal D-related protein homolog [Bombyx mori]
57	BGIBMGA013416	gi|512895171|ref|XP_004923608.1| PREDICTED: filamin-A-like [Bombyx mori]
57	BGIBMGA007338	gi|512896816|ref|XP_004924001.1| PREDICTED: aquaporin-12A-like [Bombyx mori]
57	BGIBMGA007339	gi|512896816|ref|XP_004924001.1| PREDICTED: aquaporin-12A-like [Bombyx mori]
57	BGIBMGA007546	gi|512899311|ref|XP_004924612.1| PREDICTED: esterase FE4-like [Bombyx mori]
57	BGIBMGA012526	gi|512901813|ref|XP_004925227.1| PREDICTED: alanine--glyoxylate aminotransferase 2-like [Bombyx mori]
57	BGIBMGA009977	gi|512907406|ref|XP_004926434.1| PREDICTED: PDZ and LIM domain protein 3-like isoform X3 [Bombyx mori]
57	BGIBMGA001008	gi|512913049|ref|XP_004927805.1| PREDICTED: monocarboxylate transporter 9-like [Bombyx mori]
57	BGIBMGA006032	gi|512918574|ref|XP_004929167.1| PREDICTED: adenylate kinase isoenzyme 1-like isoform X1 [Bombyx mori]
57	BGIBMGA006510	gi|512924481|ref|XP_004930606.1| PREDICTED: myosin light chain alkali-like isoform X1 [Bombyx mori]
57	BGIBMGA002660	gi|512931571|ref|XP_004932336.1| PREDICTED: myrosinase 1-like [Bombyx mori]
57	BGIBMGA008950	gi|557760292|ref|XP_005179867.1| PREDICTED: transmembrane inner ear expressed protein-like [Musca domestica]
57	BGIBMGA013644	no hints
57	bmlnct_1109	NA
58	BGIBMGA006415	gi|112982938|ref|NP_001037099.1| chorion b-ZIP transcription factor [Bombyx mori] gi|54401523|gb|AAV34566.1| chorion b-ZIP transcription factor [Bombyx mori]
58	BGIBMGA007553	gi|148298782|ref|NP_001091747.1| C-type lectin 16 precursor [Bombyx mori] gi|114796717|gb|ABI79325.1| C-type lectin [Bombyx mori]
58	BGIBMGA002259	gi|148298826|ref|NP_001091813.1| myosin regulatory light chain 2 [Bombyx mori] gi|122119463|sp|Q1HPS0.1|MLR_BOMMO RecName: Full=Myosin regulatory light chain 2; Short=MLC-2 gi|95102960|gb|ABF51421.1| myosin light chain 2 [Bombyx mori] gi|163963296|gb|ABY50568.1| myosin light chain 2 [Bombyx mandarina] gi|194371731|gb|ACF59735.1| myosin light chain 2 [Bombyx mori] gi|206114239|gb|ACI05250.1| myosi…
58	BGIBMGA014226	gi|340718034|ref|XP_003397477.1| PREDICTED: myosin heavy chain, muscle-like isoform 2 [Bombus terrestris]
58	BGIBMGA006937	gi|357625725|gb|EHJ76074.1| troponin C [Danaus plexippus]
58	BGIBMGA012864	gi|379698954|ref|NP_001243949.1| peptidoglycan recognition protein precursor [Bombyx mori] gi|355398229|gb|AER70118.1| peptidoglycan recognition protein [Bombyx mori]
58	BGIBMGA004894	gi|389610783|dbj|BAM19002.1| fau protein [Papilio polytes]
58	BGIBMGA004893	gi|390178515|ref|XP_001359095.3| GA19674, isoform F [Drosophila pseudoobscura pseudoobscura] gi|388859475|gb|EAL28238.3| GA19674, isoform F [Drosophila pseudoobscura pseudoobscura]
58	BGIBMGA013228	gi|512891843|ref|XP_004922783.1| PREDICTED: bicaudal D-related protein homolog [Bombyx mori]
58	BGIBMGA013416	gi|512895171|ref|XP_004923608.1| PREDICTED: filamin-A-like [Bombyx mori]
58	BGIBMGA007338	gi|512896816|ref|XP_004924001.1| PREDICTED: aquaporin-12A-like [Bombyx mori]
58	BGIBMGA007339	gi|512896816|ref|XP_004924001.1| PREDICTED: aquaporin-12A-like [Bombyx mori]
58	BGIBMGA012526	gi|512901813|ref|XP_004925227.1| PREDICTED: alanine--glyoxylate aminotransferase 2-like [Bombyx mori]
58	BGIBMGA009977	gi|512907406|ref|XP_004926434.1| PREDICTED: PDZ and LIM domain protein 3-like isoform X3 [Bombyx mori]
58	BGIBMGA001008	gi|512913049|ref|XP_004927805.1| PREDICTED: monocarboxylate transporter 9-like [Bombyx mori]
58	BGIBMGA006032	gi|512918574|ref|XP_004929167.1| PREDICTED: adenylate kinase isoenzyme 1-like isoform X1 [Bombyx mori]
58	BGIBMGA006510	gi|512924481|ref|XP_004930606.1| PREDICTED: myosin light chain alkali-like isoform X1 [Bombyx mori]
58	BGIBMGA002660	gi|512931571|ref|XP_004932336.1| PREDICTED: myrosinase 1-like [Bombyx mori]
58	BGIBMGA008950	gi|557760292|ref|XP_005179867.1| PREDICTED: transmembrane inner ear expressed protein-like [Musca domestica]
58	BGIBMGA013644	no hints
58	bmlnct_0499	NA
58	bmlnct_1109	NA
59	BGIBMGA006415	gi|112982938|ref|NP_001037099.1| chorion b-ZIP transcription factor [Bombyx mori] gi|54401523|gb|AAV34566.1| chorion b-ZIP transcription factor [Bombyx mori]
59	BGIBMGA002721	gi|112983202|ref|NP_001037019.1| putative deoxynucleoside kinase [Bombyx mori] gi|13506751|gb|AAK28318.1|AF226281_1 putative deoxynucleoside kinase [Bombyx mori]
59	BGIBMGA007553	gi|148298782|ref|NP_001091747.1| C-type lectin 16 precursor [Bombyx mori] gi|114796717|gb|ABI79325.1| C-type lectin [Bombyx mori]
59	BGIBMGA002259	gi|148298826|ref|NP_001091813.1| myosin regulatory light chain 2 [Bombyx mori] gi|122119463|sp|Q1HPS0.1|MLR_BOMMO RecName: Full=Myosin regulatory light chain 2; Short=MLC-2 gi|95102960|gb|ABF51421.1| myosin light chain 2 [Bombyx mori] gi|163963296|gb|ABY50568.1| myosin light chain 2 [Bombyx mandarina] gi|194371731|gb|ACF59735.1| myosin light chain 2 [Bombyx mori] gi|206114239|gb|ACI05250.1| myosi…
59	BGIBMGA014227	gi|158299190|ref|XP_319309.3| AGAP010147-PA [Anopheles gambiae str. PEST] gi|157014247|gb|EAA43613.3| AGAP010147-PA [Anopheles gambiae str. PEST]
59	BGIBMGA014226	gi|340718034|ref|XP_003397477.1| PREDICTED: myosin heavy chain, muscle-like isoform 2 [Bombus terrestris]
59	BGIBMGA006937	gi|357625725|gb|EHJ76074.1| troponin C [Danaus plexippus]
59	BGIBMGA003894	gi|383858593|ref|XP_003704785.1| PREDICTED: proton-coupled amino acid transporter 1-like [Megachile rotundata]
59	BGIBMGA004894	gi|389610783|dbj|BAM19002.1| fau protein [Papilio polytes]
59	BGIBMGA013228	gi|512891843|ref|XP_004922783.1| PREDICTED: bicaudal D-related protein homolog [Bombyx mori]
59	BGIBMGA013416	gi|512895171|ref|XP_004923608.1| PREDICTED: filamin-A-like [Bombyx mori]
59	BGIBMGA007338	gi|512896816|ref|XP_004924001.1| PREDICTED: aquaporin-12A-like [Bombyx mori]
59	BGIBMGA007339	gi|512896816|ref|XP_004924001.1| PREDICTED: aquaporin-12A-like [Bombyx mori]
59	BGIBMGA007546	gi|512899311|ref|XP_004924612.1| PREDICTED: esterase FE4-like [Bombyx mori]
59	BGIBMGA012526	gi|512901813|ref|XP_004925227.1| PREDICTED: alanine--glyoxylate aminotransferase 2-like [Bombyx mori]
59	BGIBMGA009977	gi|512907406|ref|XP_004926434.1| PREDICTED: PDZ and LIM domain protein 3-like isoform X3 [Bombyx mori]
59	BGIBMGA001008	gi|512913049|ref|XP_004927805.1| PREDICTED: monocarboxylate transporter 9-like [Bombyx mori]
59	BGIBMGA006032	gi|512918574|ref|XP_004929167.1| PREDICTED: adenylate kinase isoenzyme 1-like isoform X1 [Bombyx mori]
59	BGIBMGA006510	gi|512924481|ref|XP_004930606.1| PREDICTED: myosin light chain alkali-like isoform X1 [Bombyx mori]
59	BGIBMGA013644	no hints
59	bmlnct_1109	NA
60	BGIBMGA006415	gi|112982938|ref|NP_001037099.1| chorion b-ZIP transcription factor [Bombyx mori] gi|54401523|gb|AAV34566.1| chorion b-ZIP transcription factor [Bombyx mori]
60	BGIBMGA007553	gi|148298782|ref|NP_001091747.1| C-type lectin 16 precursor [Bombyx mori] gi|114796717|gb|ABI79325.1| C-type lectin [Bombyx mori]
60	BGIBMGA002259	gi|148298826|ref|NP_001091813.1| myosin regulatory light chain 2 [Bombyx mori] gi|122119463|sp|Q1HPS0.1|MLR_BOMMO RecName: Full=Myosin regulatory light chain 2; Short=MLC-2 gi|95102960|gb|ABF51421.1| myosin light chain 2 [Bombyx mori] gi|163963296|gb|ABY50568.1| myosin light chain 2 [Bombyx mandarina] gi|194371731|gb|ACF59735.1| myosin light chain 2 [Bombyx mori] gi|206114239|gb|ACI05250.1| myosi…
60	BGIBMGA014227	gi|158299190|ref|XP_319309.3| AGAP010147-PA [Anopheles gambiae str. PEST] gi|157014247|gb|EAA43613.3| AGAP010147-PA [Anopheles gambiae str. PEST]
60	BGIBMGA014226	gi|340718034|ref|XP_003397477.1| PREDICTED: myosin heavy chain, muscle-like isoform 2 [Bombus terrestris]
60	BGIBMGA006937	gi|357625725|gb|EHJ76074.1| troponin C [Danaus plexippus]
60	BGIBMGA003894	gi|383858593|ref|XP_003704785.1| PREDICTED: proton-coupled amino acid transporter 1-like [Megachile rotundata]
60	BGIBMGA004894	gi|389610783|dbj|BAM19002.1| fau protein [Papilio polytes]
60	BGIBMGA013228	gi|512891843|ref|XP_004922783.1| PREDICTED: bicaudal D-related protein homolog [Bombyx mori]
60	BGIBMGA013416	gi|512895171|ref|XP_004923608.1| PREDICTED: filamin-A-like [Bombyx mori]
60	BGIBMGA007338	gi|512896816|ref|XP_004924001.1| PREDICTED: aquaporin-12A-like [Bombyx mori]
60	BGIBMGA007339	gi|512896816|ref|XP_004924001.1| PREDICTED: aquaporin-12A-like [Bombyx mori]
60	BGIBMGA007546	gi|512899311|ref|XP_004924612.1| PREDICTED: esterase FE4-like [Bombyx mori]
60	BGIBMGA012526	gi|512901813|ref|XP_004925227.1| PREDICTED: alanine--glyoxylate aminotransferase 2-like [Bombyx mori]
60	BGIBMGA009977	gi|512907406|ref|XP_004926434.1| PREDICTED: PDZ and LIM domain protein 3-like isoform X3 [Bombyx mori]
60	BGIBMGA001008	gi|512913049|ref|XP_004927805.1| PREDICTED: monocarboxylate transporter 9-like [Bombyx mori]
60	BGIBMGA006032	gi|512918574|ref|XP_004929167.1| PREDICTED: adenylate kinase isoenzyme 1-like isoform X1 [Bombyx mori]
60	BGIBMGA006510	gi|512924481|ref|XP_004930606.1| PREDICTED: myosin light chain alkali-like isoform X1 [Bombyx mori]
60	BGIBMGA008950	gi|557760292|ref|XP_005179867.1| PREDICTED: transmembrane inner ear expressed protein-like [Musca domestica]
60	BGIBMGA013644	no hints
60	bmlnct_1109	NA
61	BGIBMGA002721	gi|112983202|ref|NP_001037019.1| putative deoxynucleoside kinase [Bombyx mori] gi|13506751|gb|AAK28318.1|AF226281_1 putative deoxynucleoside kinase [Bombyx mori]
61	BGIBMGA007553	gi|148298782|ref|NP_001091747.1| C-type lectin 16 precursor [Bombyx mori] gi|114796717|gb|ABI79325.1| C-type lectin [Bombyx mori]
61	BGIBMGA002259	gi|148298826|ref|NP_001091813.1| myosin regulatory light chain 2 [Bombyx mori] gi|122119463|sp|Q1HPS0.1|MLR_BOMMO RecName: Full=Myosin regulatory light chain 2; Short=MLC-2 gi|95102960|gb|ABF51421.1| myosin light chain 2 [Bombyx mori] gi|163963296|gb|ABY50568.1| myosin light chain 2 [Bombyx mandarina] gi|194371731|gb|ACF59735.1| myosin light chain 2 [Bombyx mori] gi|206114239|gb|ACI05250.1| myosi…
61	BGIBMGA014226	gi|340718034|ref|XP_003397477.1| PREDICTED: myosin heavy chain, muscle-like isoform 2 [Bombus terrestris]
61	BGIBMGA006937	gi|357625725|gb|EHJ76074.1| troponin C [Danaus plexippus]
61	BGIBMGA012864	gi|379698954|ref|NP_001243949.1| peptidoglycan recognition protein precursor [Bombyx mori] gi|355398229|gb|AER70118.1| peptidoglycan recognition protein [Bombyx mori]
61	BGIBMGA004894	gi|389610783|dbj|BAM19002.1| fau protein [Papilio polytes]
61	BGIBMGA013228	gi|512891843|ref|XP_004922783.1| PREDICTED: bicaudal D-related protein homolog [Bombyx mori]
61	BGIBMGA013416	gi|512895171|ref|XP_004923608.1| PREDICTED: filamin-A-like [Bombyx mori]
61	BGIBMGA007338	gi|512896816|ref|XP_004924001.1| PREDICTED: aquaporin-12A-like [Bombyx mori]
61	BGIBMGA007339	gi|512896816|ref|XP_004924001.1| PREDICTED: aquaporin-12A-like [Bombyx mori]
61	BGIBMGA012526	gi|512901813|ref|XP_004925227.1| PREDICTED: alanine--glyoxylate aminotransferase 2-like [Bombyx mori]
61	BGIBMGA004268	gi|512902337|ref|XP_004925351.1| PREDICTED: N-acetyltransferase ESCO1-like [Bombyx mori]
61	BGIBMGA001008	gi|512913049|ref|XP_004927805.1| PREDICTED: monocarboxylate transporter 9-like [Bombyx mori]
61	BGIBMGA006032	gi|512918574|ref|XP_004929167.1| PREDICTED: adenylate kinase isoenzyme 1-like isoform X1 [Bombyx mori]
61	BGIBMGA006510	gi|512924481|ref|XP_004930606.1| PREDICTED: myosin light chain alkali-like isoform X1 [Bombyx mori]
61	BGIBMGA002660	gi|512931571|ref|XP_004932336.1| PREDICTED: myrosinase 1-like [Bombyx mori]
61	BGIBMGA011440	gi|512933046|ref|XP_004932694.1| PREDICTED: uncharacterized protein LOC101739051 isoform X1 [Bombyx mori]
61	bmlnct_1109	NA
62	BGIBMGA002721	gi|112983202|ref|NP_001037019.1| putative deoxynucleoside kinase [Bombyx mori] gi|13506751|gb|AAK28318.1|AF226281_1 putative deoxynucleoside kinase [Bombyx mori]
62	BGIBMGA007553	gi|148298782|ref|NP_001091747.1| C-type lectin 16 precursor [Bombyx mori] gi|114796717|gb|ABI79325.1| C-type lectin [Bombyx mori]
62	BGIBMGA002259	gi|148298826|ref|NP_001091813.1| myosin regulatory light chain 2 [Bombyx mori] gi|122119463|sp|Q1HPS0.1|MLR_BOMMO RecName: Full=Myosin regulatory light chain 2; Short=MLC-2 gi|95102960|gb|ABF51421.1| myosin light chain 2 [Bombyx mori] gi|163963296|gb|ABY50568.1| myosin light chain 2 [Bombyx mandarina] gi|194371731|gb|ACF59735.1| myosin light chain 2 [Bombyx mori] gi|206114239|gb|ACI05250.1| myosi…
62	BGIBMGA014226	gi|340718034|ref|XP_003397477.1| PREDICTED: myosin heavy chain, muscle-like isoform 2 [Bombus terrestris]
62	BGIBMGA006937	gi|357625725|gb|EHJ76074.1| troponin C [Danaus plexippus]
62	BGIBMGA012864	gi|379698954|ref|NP_001243949.1| peptidoglycan recognition protein precursor [Bombyx mori] gi|355398229|gb|AER70118.1| peptidoglycan recognition protein [Bombyx mori]
62	BGIBMGA004894	gi|389610783|dbj|BAM19002.1| fau protein [Papilio polytes]
62	BGIBMGA013228	gi|512891843|ref|XP_004922783.1| PREDICTED: bicaudal D-related protein homolog [Bombyx mori]
62	BGIBMGA013416	gi|512895171|ref|XP_004923608.1| PREDICTED: filamin-A-like [Bombyx mori]
62	BGIBMGA007338	gi|512896816|ref|XP_004924001.1| PREDICTED: aquaporin-12A-like [Bombyx mori]
62	BGIBMGA007339	gi|512896816|ref|XP_004924001.1| PREDICTED: aquaporin-12A-like [Bombyx mori]
62	BGIBMGA007546	gi|512899311|ref|XP_004924612.1| PREDICTED: esterase FE4-like [Bombyx mori]
62	BGIBMGA012526	gi|512901813|ref|XP_004925227.1| PREDICTED: alanine--glyoxylate aminotransferase 2-like [Bombyx mori]
62	BGIBMGA004268	gi|512902337|ref|XP_004925351.1| PREDICTED: N-acetyltransferase ESCO1-like [Bombyx mori]
62	BGIBMGA001008	gi|512913049|ref|XP_004927805.1| PREDICTED: monocarboxylate transporter 9-like [Bombyx mori]
62	BGIBMGA006032	gi|512918574|ref|XP_004929167.1| PREDICTED: adenylate kinase isoenzyme 1-like isoform X1 [Bombyx mori]
62	BGIBMGA006510	gi|512924481|ref|XP_004930606.1| PREDICTED: myosin light chain alkali-like isoform X1 [Bombyx mori]
62	BGIBMGA002660	gi|512931571|ref|XP_004932336.1| PREDICTED: myrosinase 1-like [Bombyx mori]
62	bmlnct_1109	NA
63	BGIBMGA002721	gi|112983202|ref|NP_001037019.1| putative deoxynucleoside kinase [Bombyx mori] gi|13506751|gb|AAK28318.1|AF226281_1 putative deoxynucleoside kinase [Bombyx mori]
63	BGIBMGA007553	gi|148298782|ref|NP_001091747.1| C-type lectin 16 precursor [Bombyx mori] gi|114796717|gb|ABI79325.1| C-type lectin [Bombyx mori]
63	BGIBMGA002259	gi|148298826|ref|NP_001091813.1| myosin regulatory light chain 2 [Bombyx mori] gi|122119463|sp|Q1HPS0.1|MLR_BOMMO RecName: Full=Myosin regulatory light chain 2; Short=MLC-2 gi|95102960|gb|ABF51421.1| myosin light chain 2 [Bombyx mori] gi|163963296|gb|ABY50568.1| myosin light chain 2 [Bombyx mandarina] gi|194371731|gb|ACF59735.1| myosin light chain 2 [Bombyx mori] gi|206114239|gb|ACI05250.1| myosi…
63	BGIBMGA014227	gi|158299190|ref|XP_319309.3| AGAP010147-PA [Anopheles gambiae str. PEST] gi|157014247|gb|EAA43613.3| AGAP010147-PA [Anopheles gambiae str. PEST]
63	BGIBMGA014226	gi|340718034|ref|XP_003397477.1| PREDICTED: myosin heavy chain, muscle-like isoform 2 [Bombus terrestris]
63	BGIBMGA006937	gi|357625725|gb|EHJ76074.1| troponin C [Danaus plexippus]
63	BGIBMGA004894	gi|389610783|dbj|BAM19002.1| fau protein [Papilio polytes]
63	BGIBMGA013228	gi|512891843|ref|XP_004922783.1| PREDICTED: bicaudal D-related protein homolog [Bombyx mori]
63	BGIBMGA013416	gi|512895171|ref|XP_004923608.1| PREDICTED: filamin-A-like [Bombyx mori]
63	BGIBMGA007338	gi|512896816|ref|XP_004924001.1| PREDICTED: aquaporin-12A-like [Bombyx mori]
63	BGIBMGA007339	gi|512896816|ref|XP_004924001.1| PREDICTED: aquaporin-12A-like [Bombyx mori]
63	BGIBMGA007546	gi|512899311|ref|XP_004924612.1| PREDICTED: esterase FE4-like [Bombyx mori]
63	BGIBMGA012526	gi|512901813|ref|XP_004925227.1| PREDICTED: alanine--glyoxylate aminotransferase 2-like [Bombyx mori]
63	BGIBMGA004268	gi|512902337|ref|XP_004925351.1| PREDICTED: N-acetyltransferase ESCO1-like [Bombyx mori]
63	BGIBMGA001008	gi|512913049|ref|XP_004927805.1| PREDICTED: monocarboxylate transporter 9-like [Bombyx mori]
63	BGIBMGA006032	gi|512918574|ref|XP_004929167.1| PREDICTED: adenylate kinase isoenzyme 1-like isoform X1 [Bombyx mori]
63	BGIBMGA006510	gi|512924481|ref|XP_004930606.1| PREDICTED: myosin light chain alkali-like isoform X1 [Bombyx mori]
63	BGIBMGA002660	gi|512931571|ref|XP_004932336.1| PREDICTED: myrosinase 1-like [Bombyx mori]
63	bmlnct_1109	NA
64	BGIBMGA002721	gi|112983202|ref|NP_001037019.1| putative deoxynucleoside kinase [Bombyx mori] gi|13506751|gb|AAK28318.1|AF226281_1 putative deoxynucleoside kinase [Bombyx mori]
64	BGIBMGA007553	gi|148298782|ref|NP_001091747.1| C-type lectin 16 precursor [Bombyx mori] gi|114796717|gb|ABI79325.1| C-type lectin [Bombyx mori]
64	BGIBMGA002259	gi|148298826|ref|NP_001091813.1| myosin regulatory light chain 2 [Bombyx mori] gi|122119463|sp|Q1HPS0.1|MLR_BOMMO RecName: Full=Myosin regulatory light chain 2; Short=MLC-2 gi|95102960|gb|ABF51421.1| myosin light chain 2 [Bombyx mori] gi|163963296|gb|ABY50568.1| myosin light chain 2 [Bombyx mandarina] gi|194371731|gb|ACF59735.1| myosin light chain 2 [Bombyx mori] gi|206114239|gb|ACI05250.1| myosi…
64	BGIBMGA014227	gi|158299190|ref|XP_319309.3| AGAP010147-PA [Anopheles gambiae str. PEST] gi|157014247|gb|EAA43613.3| AGAP010147-PA [Anopheles gambiae str. PEST]
64	BGIBMGA014226	gi|340718034|ref|XP_003397477.1| PREDICTED: myosin heavy chain, muscle-like isoform 2 [Bombus terrestris]
64	BGIBMGA006937	gi|357625725|gb|EHJ76074.1| troponin C [Danaus plexippus]
64	BGIBMGA003894	gi|383858593|ref|XP_003704785.1| PREDICTED: proton-coupled amino acid transporter 1-like [Megachile rotundata]
64	BGIBMGA004894	gi|389610783|dbj|BAM19002.1| fau protein [Papilio polytes]
64	BGIBMGA013228	gi|512891843|ref|XP_004922783.1| PREDICTED: bicaudal D-related protein homolog [Bombyx mori]
64	BGIBMGA013416	gi|512895171|ref|XP_004923608.1| PREDICTED: filamin-A-like [Bombyx mori]
64	BGIBMGA007338	gi|512896816|ref|XP_004924001.1| PREDICTED: aquaporin-12A-like [Bombyx mori]
64	BGIBMGA007339	gi|512896816|ref|XP_004924001.1| PREDICTED: aquaporin-12A-like [Bombyx mori]
64	BGIBMGA007546	gi|512899311|ref|XP_004924612.1| PREDICTED: esterase FE4-like [Bombyx mori]
64	BGIBMGA012526	gi|512901813|ref|XP_004925227.1| PREDICTED: alanine--glyoxylate aminotransferase 2-like [Bombyx mori]
64	BGIBMGA004268	gi|512902337|ref|XP_004925351.1| PREDICTED: N-acetyltransferase ESCO1-like [Bombyx mori]
64	BGIBMGA001008	gi|512913049|ref|XP_004927805.1| PREDICTED: monocarboxylate transporter 9-like [Bombyx mori]
64	BGIBMGA006032	gi|512918574|ref|XP_004929167.1| PREDICTED: adenylate kinase isoenzyme 1-like isoform X1 [Bombyx mori]
64	BGIBMGA006510	gi|512924481|ref|XP_004930606.1| PREDICTED: myosin light chain alkali-like isoform X1 [Bombyx mori]
64	bmlnct_1109	NA
65	BGIBMGA008861	gi|114051976|ref|NP_001040443.1| troponin C 25D [Bombyx mori] gi|95102914|gb|ABF51398.1| troponin C 25D [Bombyx mori] gi|168472701|gb|ACA24126.1| troponin C 25D [Bombyx mandarina]
65	BGIBMGA013700	gi|114052138|ref|NP_001040221.1| troponin T [Bombyx mori] gi|87248429|gb|ABD36267.1| troponin T [Bombyx mori]
65	BGIBMGA001201	gi|114052470|ref|NP_001040476.1| muscular protein 20 [Bombyx mori] gi|95103052|gb|ABF51467.1| muscular protein 20 [Bombyx mori]
65	BGIBMGA005786	gi|153791757|ref|NP_001093275.1| myo-inositol oxygenase [Bombyx mori] gi|95102966|gb|ABF51424.1| myo-inositol oxygenase [Bombyx mori]
65	BGIBMGA001202	gi|160333386|ref|NP_001103762.1| muscle LIM protein isoform 1 [Bombyx mori] gi|87248175|gb|ABD36140.1| muscle LIM protein [Bombyx mori]
65	BGIBMGA001031	gi|225346691|gb|ACN86368.1| troponin I transcript variant A [Bombyx mandarina]
65	BGIBMGA001030	gi|225346693|gb|ACN86369.1| troponin I transcript variant B [Bombyx mandarina]
65	BGIBMGA000737	gi|389609045|dbj|BAM18134.1| unknown unsecreted protein [Papilio xuthus]
65	BGIBMGA005599	gi|512887474|ref|XP_004921931.1| PREDICTED: SLIT and NTRK-like protein 6-like [Bombyx mori]
65	BGIBMGA004546	gi|512894841|ref|XP_004923527.1| PREDICTED: LOW QUALITY PROTEIN: twitchin-like [Bombyx mori]
65	BGIBMGA004547	gi|512894841|ref|XP_004923527.1| PREDICTED: LOW QUALITY PROTEIN: twitchin-like [Bombyx mori]
65	BGIBMGA012494	gi|512896883|ref|XP_004924018.1| PREDICTED: uncharacterized protein LOC101741905 isoform X1 [Bombyx mori]
65	BGIBMGA009088	gi|512898417|ref|XP_004924395.1| PREDICTED: uncharacterized protein LOC101737434 isoform X2 [Bombyx mori]
65	BGIBMGA007494	gi|512899603|ref|XP_004924686.1| PREDICTED: multidrug resistance protein 1A-like isoform X1 [Bombyx mori] gi|512899606|ref|XP_004924687.1| PREDICTED: multidrug resistance protein 1A-like isoform X2 [Bombyx mori]
65	BGIBMGA012680	gi|512900044|ref|XP_004924796.1| PREDICTED: four and a half LIM domains protein 2-like isoform X3 [Bombyx mori]
65	BGIBMGA014126	gi|512901593|ref|XP_004925173.1| PREDICTED: RING finger protein nhl-1-like isoform X1 [Bombyx mori] gi|512901597|ref|XP_004925174.1| PREDICTED: RING finger protein nhl-1-like isoform X2 [Bombyx mori]
65	BGIBMGA012548	gi|512901857|ref|XP_004925235.1| PREDICTED: sphingomyelin phosphodiesterase-like [Bombyx mori]
65	BGIBMGA003326	gi|512902786|ref|XP_004925460.1| PREDICTED: uncharacterized protein LOC101738880 isoform X2 [Bombyx mori] gi|512902790|ref|XP_004925461.1| PREDICTED: uncharacterized protein LOC101738880 isoform X3 [Bombyx mori] gi|512902794|ref|XP_004925462.1| PREDICTED: uncharacterized protein LOC101738880 isoform X4 [Bombyx mori] gi|512902798|ref|XP_004925463.1| PREDICTED: uncharacterized protein LOC101738880 …
65	BGIBMGA007278	gi|512905068|ref|XP_004925853.1| PREDICTED: putative inorganic phosphate cotransporter-like [Bombyx mori]
65	BGIBMGA012221	gi|512911580|ref|XP_004927448.1| PREDICTED: melanotransferrin-like [Bombyx mori]
65	BGIBMGA014428	gi|512912568|ref|XP_004927690.1| PREDICTED: collagenase-like [Bombyx mori]
65	BGIBMGA000896	gi|512913554|ref|XP_004927925.1| PREDICTED: zinc transporter 8-like [Bombyx mori]
65	BGIBMGA001276	gi|512913741|ref|XP_004927968.1| PREDICTED: cytochrome P450 CYP12A2-like isoform X1 [Bombyx mori] gi|433339062|dbj|BAM73885.1| cytochrome P450 [Bombyx mori] gi|433339071|dbj|BAM73888.1| cytochrome P450 [Bombyx mori]
65	BGIBMGA001491	gi|512920851|ref|XP_004929736.1| PREDICTED: chondroitin proteoglycan 2-like [Bombyx mori]
65	BGIBMGA011320	gi|512925301|ref|XP_004930805.1| PREDICTED: leucine-rich repeat-containing protein 70-like [Bombyx mori]
65	BGIBMGA002432	gi|512926607|ref|XP_004931128.1| PREDICTED: V-type proton ATPase 116 kDa subunit a isoform 1-like isoform X1 [Bombyx mori] gi|512926611|ref|XP_004931129.1| PREDICTED: V-type proton ATPase 116 kDa subunit a isoform 1-like isoform X2 [Bombyx mori]
65	BGIBMGA010741	gi|512934415|ref|XP_004933027.1| PREDICTED: facilitated trehalose transporter Tret1-like [Bombyx mori]
65	BGIBMGA000065	gi|512939991|ref|XP_004934367.1| PREDICTED: cystathionine beta-synthase-like isoform X2 [Bombyx mori]
65	BGIBMGA014429	gi|61191881|gb|AAX39408.1| serine protease [Bombyx mandarina] gi|164470774|gb|ABY58153.1| serine protease [Bombyx mandarina]
65	AK382731	NA
65	BGIBMGA003322	no hints
65	BGIBMGA005970	no hints
66	BGIBMGA003458	gi|108872133|gb|EAT36358.1| AAEL011551-PA [Aedes aegypti]
66	BGIBMGA004865	gi|112983654|ref|NP_001036872.1| Bombyrin precursor [Bombyx mori]
66	BGIBMGA008861	gi|114051976|ref|NP_001040443.1| troponin C 25D [Bombyx mori] gi|95102914|gb|ABF51398.1| troponin C 25D [Bombyx mori] gi|168472701|gb|ACA24126.1| troponin C 25D [Bombyx mandarina]
66	BGIBMGA013700	gi|114052138|ref|NP_001040221.1| troponin T [Bombyx mori] gi|87248429|gb|ABD36267.1| troponin T [Bombyx mori]
66	BGIBMGA001201	gi|114052470|ref|NP_001040476.1| muscular protein 20 [Bombyx mori] gi|95103052|gb|ABF51467.1| muscular protein 20 [Bombyx mori]
66	BGIBMGA005786	gi|153791757|ref|NP_001093275.1| myo-inositol oxygenase [Bombyx mori] gi|95102966|gb|ABF51424.1| myo-inositol oxygenase [Bombyx mori]
66	BGIBMGA001202	gi|160333386|ref|NP_001103762.1| muscle LIM protein isoform 1 [Bombyx mori] gi|87248175|gb|ABD36140.1| muscle LIM protein [Bombyx mori]
66	BGIBMGA005024	gi|160425399|gb|ABX39543.1| single domain major allergen protein [Gonepteryx rhamni]
66	BGIBMGA001031	gi|225346691|gb|ACN86368.1| troponin I transcript variant A [Bombyx mandarina]
66	BGIBMGA001030	gi|225346693|gb|ACN86369.1| troponin I transcript variant B [Bombyx mandarina]
66	BGIBMGA000737	gi|389609045|dbj|BAM18134.1| unknown unsecreted protein [Papilio xuthus]
66	BGIBMGA005599	gi|512887474|ref|XP_004921931.1| PREDICTED: SLIT and NTRK-like protein 6-like [Bombyx mori]
66	BGIBMGA004546	gi|512894841|ref|XP_004923527.1| PREDICTED: LOW QUALITY PROTEIN: twitchin-like [Bombyx mori]
66	BGIBMGA004547	gi|512894841|ref|XP_004923527.1| PREDICTED: LOW QUALITY PROTEIN: twitchin-like [Bombyx mori]
66	BGIBMGA012494	gi|512896883|ref|XP_004924018.1| PREDICTED: uncharacterized protein LOC101741905 isoform X1 [Bombyx mori]
66	BGIBMGA009088	gi|512898417|ref|XP_004924395.1| PREDICTED: uncharacterized protein LOC101737434 isoform X2 [Bombyx mori]
66	BGIBMGA007494	gi|512899603|ref|XP_004924686.1| PREDICTED: multidrug resistance protein 1A-like isoform X1 [Bombyx mori] gi|512899606|ref|XP_004924687.1| PREDICTED: multidrug resistance protein 1A-like isoform X2 [Bombyx mori]
66	BGIBMGA012680	gi|512900044|ref|XP_004924796.1| PREDICTED: four and a half LIM domains protein 2-like isoform X3 [Bombyx mori]
66	BGIBMGA014126	gi|512901593|ref|XP_004925173.1| PREDICTED: RING finger protein nhl-1-like isoform X1 [Bombyx mori] gi|512901597|ref|XP_004925174.1| PREDICTED: RING finger protein nhl-1-like isoform X2 [Bombyx mori]
66	BGIBMGA012548	gi|512901857|ref|XP_004925235.1| PREDICTED: sphingomyelin phosphodiesterase-like [Bombyx mori]
66	BGIBMGA003326	gi|512902786|ref|XP_004925460.1| PREDICTED: uncharacterized protein LOC101738880 isoform X2 [Bombyx mori] gi|512902790|ref|XP_004925461.1| PREDICTED: uncharacterized protein LOC101738880 isoform X3 [Bombyx mori] gi|512902794|ref|XP_004925462.1| PREDICTED: uncharacterized protein LOC101738880 isoform X4 [Bombyx mori] gi|512902798|ref|XP_004925463.1| PREDICTED: uncharacterized protein LOC101738880 …
66	BGIBMGA007278	gi|512905068|ref|XP_004925853.1| PREDICTED: putative inorganic phosphate cotransporter-like [Bombyx mori]
66	BGIBMGA014149	gi|512906413|ref|XP_004926190.1| PREDICTED: myrosinase 1-like [Bombyx mori]
66	BGIBMGA012221	gi|512911580|ref|XP_004927448.1| PREDICTED: melanotransferrin-like [Bombyx mori]
66	BGIBMGA009199	gi|512911768|ref|XP_004927493.1| PREDICTED: organic cation transporter protein-like [Bombyx mori]
66	BGIBMGA014428	gi|512912568|ref|XP_004927690.1| PREDICTED: collagenase-like [Bombyx mori]
66	BGIBMGA000896	gi|512913554|ref|XP_004927925.1| PREDICTED: zinc transporter 8-like [Bombyx mori]
66	BGIBMGA010741	gi|512934415|ref|XP_004933027.1| PREDICTED: facilitated trehalose transporter Tret1-like [Bombyx mori]
66	BGIBMGA007675	gi|55583303|dbj|BAD69569.1| aquaporin AQP-Bom1 [Bombyx mori]
66	BGIBMGA014429	gi|61191881|gb|AAX39408.1| serine protease [Bombyx mandarina] gi|164470774|gb|ABY58153.1| serine protease [Bombyx mandarina]
66	BGIBMGA003322	no hints
66	BGIBMGA005970	no hints
66	BGIBMGA014298	no hints
67	BGIBMGA004865	gi|112983654|ref|NP_001036872.1| Bombyrin precursor [Bombyx mori]
67	BGIBMGA008861	gi|114051976|ref|NP_001040443.1| troponin C 25D [Bombyx mori] gi|95102914|gb|ABF51398.1| troponin C 25D [Bombyx mori] gi|168472701|gb|ACA24126.1| troponin C 25D [Bombyx mandarina]
67	BGIBMGA013700	gi|114052138|ref|NP_001040221.1| troponin T [Bombyx mori] gi|87248429|gb|ABD36267.1| troponin T [Bombyx mori]
67	BGIBMGA001201	gi|114052470|ref|NP_001040476.1| muscular protein 20 [Bombyx mori] gi|95103052|gb|ABF51467.1| muscular protein 20 [Bombyx mori]
67	BGIBMGA005786	gi|153791757|ref|NP_001093275.1| myo-inositol oxygenase [Bombyx mori] gi|95102966|gb|ABF51424.1| myo-inositol oxygenase [Bombyx mori]
67	BGIBMGA001202	gi|160333386|ref|NP_001103762.1| muscle LIM protein isoform 1 [Bombyx mori] gi|87248175|gb|ABD36140.1| muscle LIM protein [Bombyx mori]
67	BGIBMGA005024	gi|160425399|gb|ABX39543.1| single domain major allergen protein [Gonepteryx rhamni]
67	BGIBMGA001031	gi|225346691|gb|ACN86368.1| troponin I transcript variant A [Bombyx mandarina]
67	BGIBMGA001030	gi|225346693|gb|ACN86369.1| troponin I transcript variant B [Bombyx mandarina]
67	BGIBMGA000737	gi|389609045|dbj|BAM18134.1| unknown unsecreted protein [Papilio xuthus]
67	BGIBMGA005599	gi|512887474|ref|XP_004921931.1| PREDICTED: SLIT and NTRK-like protein 6-like [Bombyx mori]
67	BGIBMGA004546	gi|512894841|ref|XP_004923527.1| PREDICTED: LOW QUALITY PROTEIN: twitchin-like [Bombyx mori]
67	BGIBMGA004547	gi|512894841|ref|XP_004923527.1| PREDICTED: LOW QUALITY PROTEIN: twitchin-like [Bombyx mori]
67	BGIBMGA012494	gi|512896883|ref|XP_004924018.1| PREDICTED: uncharacterized protein LOC101741905 isoform X1 [Bombyx mori]
67	BGIBMGA009088	gi|512898417|ref|XP_004924395.1| PREDICTED: uncharacterized protein LOC101737434 isoform X2 [Bombyx mori]
67	BGIBMGA007494	gi|512899603|ref|XP_004924686.1| PREDICTED: multidrug resistance protein 1A-like isoform X1 [Bombyx mori] gi|512899606|ref|XP_004924687.1| PREDICTED: multidrug resistance protein 1A-like isoform X2 [Bombyx mori]
67	BGIBMGA012680	gi|512900044|ref|XP_004924796.1| PREDICTED: four and a half LIM domains protein 2-like isoform X3 [Bombyx mori]
67	BGIBMGA014126	gi|512901593|ref|XP_004925173.1| PREDICTED: RING finger protein nhl-1-like isoform X1 [Bombyx mori] gi|512901597|ref|XP_004925174.1| PREDICTED: RING finger protein nhl-1-like isoform X2 [Bombyx mori]
67	BGIBMGA012548	gi|512901857|ref|XP_004925235.1| PREDICTED: sphingomyelin phosphodiesterase-like [Bombyx mori]
67	BGIBMGA003326	gi|512902786|ref|XP_004925460.1| PREDICTED: uncharacterized protein LOC101738880 isoform X2 [Bombyx mori] gi|512902790|ref|XP_004925461.1| PREDICTED: uncharacterized protein LOC101738880 isoform X3 [Bombyx mori] gi|512902794|ref|XP_004925462.1| PREDICTED: uncharacterized protein LOC101738880 isoform X4 [Bombyx mori] gi|512902798|ref|XP_004925463.1| PREDICTED: uncharacterized protein LOC101738880 …
67	BGIBMGA007278	gi|512905068|ref|XP_004925853.1| PREDICTED: putative inorganic phosphate cotransporter-like [Bombyx mori]
67	BGIBMGA014149	gi|512906413|ref|XP_004926190.1| PREDICTED: myrosinase 1-like [Bombyx mori]
67	BGIBMGA013638	gi|512907994|ref|XP_004926573.1| PREDICTED: synaptic vesicle 2-related protein-like [Bombyx mori]
67	BGIBMGA012221	gi|512911580|ref|XP_004927448.1| PREDICTED: melanotransferrin-like [Bombyx mori]
67	BGIBMGA009199	gi|512911768|ref|XP_004927493.1| PREDICTED: organic cation transporter protein-like [Bombyx mori]
67	BGIBMGA014428	gi|512912568|ref|XP_004927690.1| PREDICTED: collagenase-like [Bombyx mori]
67	BGIBMGA000896	gi|512913554|ref|XP_004927925.1| PREDICTED: zinc transporter 8-like [Bombyx mori]
67	BGIBMGA010741	gi|512934415|ref|XP_004933027.1| PREDICTED: facilitated trehalose transporter Tret1-like [Bombyx mori]
67	BGIBMGA007675	gi|55583303|dbj|BAD69569.1| aquaporin AQP-Bom1 [Bombyx mori]
67	BGIBMGA014429	gi|61191881|gb|AAX39408.1| serine protease [Bombyx mandarina] gi|164470774|gb|ABY58153.1| serine protease [Bombyx mandarina]
67	BGIBMGA003322	no hints
67	BGIBMGA005970	no hints
67	BGIBMGA014298	no hints
68	BGIBMGA004865	gi|112983654|ref|NP_001036872.1| Bombyrin precursor [Bombyx mori]
68	BGIBMGA008861	gi|114051976|ref|NP_001040443.1| troponin C 25D [Bombyx mori] gi|95102914|gb|ABF51398.1| troponin C 25D [Bombyx mori] gi|168472701|gb|ACA24126.1| troponin C 25D [Bombyx mandarina]
68	BGIBMGA013700	gi|114052138|ref|NP_001040221.1| troponin T [Bombyx mori] gi|87248429|gb|ABD36267.1| troponin T [Bombyx mori]
68	BGIBMGA001201	gi|114052470|ref|NP_001040476.1| muscular protein 20 [Bombyx mori] gi|95103052|gb|ABF51467.1| muscular protein 20 [Bombyx mori]
68	BGIBMGA005786	gi|153791757|ref|NP_001093275.1| myo-inositol oxygenase [Bombyx mori] gi|95102966|gb|ABF51424.1| myo-inositol oxygenase [Bombyx mori]
68	BGIBMGA001202	gi|160333386|ref|NP_001103762.1| muscle LIM protein isoform 1 [Bombyx mori] gi|87248175|gb|ABD36140.1| muscle LIM protein [Bombyx mori]
68	BGIBMGA005024	gi|160425399|gb|ABX39543.1| single domain major allergen protein [Gonepteryx rhamni]
68	BGIBMGA001031	gi|225346691|gb|ACN86368.1| troponin I transcript variant A [Bombyx mandarina]
68	BGIBMGA001030	gi|225346693|gb|ACN86369.1| troponin I transcript variant B [Bombyx mandarina]
68	BGIBMGA000736	gi|389609045|dbj|BAM18134.1| unknown unsecreted protein [Papilio xuthus]
68	BGIBMGA000737	gi|389609045|dbj|BAM18134.1| unknown unsecreted protein [Papilio xuthus]
68	BGIBMGA005599	gi|512887474|ref|XP_004921931.1| PREDICTED: SLIT and NTRK-like protein 6-like [Bombyx mori]
68	BGIBMGA004546	gi|512894841|ref|XP_004923527.1| PREDICTED: LOW QUALITY PROTEIN: twitchin-like [Bombyx mori]
68	BGIBMGA004547	gi|512894841|ref|XP_004923527.1| PREDICTED: LOW QUALITY PROTEIN: twitchin-like [Bombyx mori]
68	BGIBMGA012494	gi|512896883|ref|XP_004924018.1| PREDICTED: uncharacterized protein LOC101741905 isoform X1 [Bombyx mori]
68	BGIBMGA009088	gi|512898417|ref|XP_004924395.1| PREDICTED: uncharacterized protein LOC101737434 isoform X2 [Bombyx mori]
68	BGIBMGA007494	gi|512899603|ref|XP_004924686.1| PREDICTED: multidrug resistance protein 1A-like isoform X1 [Bombyx mori] gi|512899606|ref|XP_004924687.1| PREDICTED: multidrug resistance protein 1A-like isoform X2 [Bombyx mori]
68	BGIBMGA012680	gi|512900044|ref|XP_004924796.1| PREDICTED: four and a half LIM domains protein 2-like isoform X3 [Bombyx mori]
68	BGIBMGA014126	gi|512901593|ref|XP_004925173.1| PREDICTED: RING finger protein nhl-1-like isoform X1 [Bombyx mori] gi|512901597|ref|XP_004925174.1| PREDICTED: RING finger protein nhl-1-like isoform X2 [Bombyx mori]
68	BGIBMGA012548	gi|512901857|ref|XP_004925235.1| PREDICTED: sphingomyelin phosphodiesterase-like [Bombyx mori]
68	BGIBMGA003326	gi|512902786|ref|XP_004925460.1| PREDICTED: uncharacterized protein LOC101738880 isoform X2 [Bombyx mori] gi|512902790|ref|XP_004925461.1| PREDICTED: uncharacterized protein LOC101738880 isoform X3 [Bombyx mori] gi|512902794|ref|XP_004925462.1| PREDICTED: uncharacterized protein LOC101738880 isoform X4 [Bombyx mori] gi|512902798|ref|XP_004925463.1| PREDICTED: uncharacterized protein LOC101738880 …
68	BGIBMGA007278	gi|512905068|ref|XP_004925853.1| PREDICTED: putative inorganic phosphate cotransporter-like [Bombyx mori]
68	BGIBMGA013638	gi|512907994|ref|XP_004926573.1| PREDICTED: synaptic vesicle 2-related protein-like [Bombyx mori]
68	BGIBMGA012221	gi|512911580|ref|XP_004927448.1| PREDICTED: melanotransferrin-like [Bombyx mori]
68	BGIBMGA009199	gi|512911768|ref|XP_004927493.1| PREDICTED: organic cation transporter protein-like [Bombyx mori]
68	BGIBMGA014428	gi|512912568|ref|XP_004927690.1| PREDICTED: collagenase-like [Bombyx mori]
68	BGIBMGA000896	gi|512913554|ref|XP_004927925.1| PREDICTED: zinc transporter 8-like [Bombyx mori]
68	BGIBMGA010741	gi|512934415|ref|XP_004933027.1| PREDICTED: facilitated trehalose transporter Tret1-like [Bombyx mori]
68	BGIBMGA007675	gi|55583303|dbj|BAD69569.1| aquaporin AQP-Bom1 [Bombyx mori]
68	BGIBMGA014429	gi|61191881|gb|AAX39408.1| serine protease [Bombyx mandarina] gi|164470774|gb|ABY58153.1| serine protease [Bombyx mandarina]
68	BGIBMGA003322	no hints
68	BGIBMGA005970	no hints
68	BGIBMGA014298	no hints
69	BGIBMGA008861	gi|114051976|ref|NP_001040443.1| troponin C 25D [Bombyx mori] gi|95102914|gb|ABF51398.1| troponin C 25D [Bombyx mori] gi|168472701|gb|ACA24126.1| troponin C 25D [Bombyx mandarina]
69	BGIBMGA013700	gi|114052138|ref|NP_001040221.1| troponin T [Bombyx mori] gi|87248429|gb|ABD36267.1| troponin T [Bombyx mori]
69	BGIBMGA001201	gi|114052470|ref|NP_001040476.1| muscular protein 20 [Bombyx mori] gi|95103052|gb|ABF51467.1| muscular protein 20 [Bombyx mori]
69	BGIBMGA005786	gi|153791757|ref|NP_001093275.1| myo-inositol oxygenase [Bombyx mori] gi|95102966|gb|ABF51424.1| myo-inositol oxygenase [Bombyx mori]
69	BGIBMGA001202	gi|160333386|ref|NP_001103762.1| muscle LIM protein isoform 1 [Bombyx mori] gi|87248175|gb|ABD36140.1| muscle LIM protein [Bombyx mori]
69	BGIBMGA013756	gi|171740881|gb|ACB54935.1| chitin deacetylase [Helicoverpa armigera]
69	BGIBMGA001031	gi|225346691|gb|ACN86368.1| troponin I transcript variant A [Bombyx mandarina]
69	BGIBMGA001030	gi|225346693|gb|ACN86369.1| troponin I transcript variant B [Bombyx mandarina]
69	BGIBMGA000737	gi|389609045|dbj|BAM18134.1| unknown unsecreted protein [Papilio xuthus]
69	BGIBMGA005599	gi|512887474|ref|XP_004921931.1| PREDICTED: SLIT and NTRK-like protein 6-like [Bombyx mori]
69	BGIBMGA004801	gi|512894416|ref|XP_004923425.1| PREDICTED: zinc carboxypeptidase-like [Bombyx mori]
69	BGIBMGA004546	gi|512894841|ref|XP_004923527.1| PREDICTED: LOW QUALITY PROTEIN: twitchin-like [Bombyx mori]
69	BGIBMGA004547	gi|512894841|ref|XP_004923527.1| PREDICTED: LOW QUALITY PROTEIN: twitchin-like [Bombyx mori]
69	BGIBMGA012494	gi|512896883|ref|XP_004924018.1| PREDICTED: uncharacterized protein LOC101741905 isoform X1 [Bombyx mori]
69	BGIBMGA013816	gi|512898251|ref|XP_004924354.1| PREDICTED: hydroxylysine kinase-like [Bombyx mori]
69	BGIBMGA009088	gi|512898417|ref|XP_004924395.1| PREDICTED: uncharacterized protein LOC101737434 isoform X2 [Bombyx mori]
69	BGIBMGA007494	gi|512899603|ref|XP_004924686.1| PREDICTED: multidrug resistance protein 1A-like isoform X1 [Bombyx mori] gi|512899606|ref|XP_004924687.1| PREDICTED: multidrug resistance protein 1A-like isoform X2 [Bombyx mori]
69	BGIBMGA012680	gi|512900044|ref|XP_004924796.1| PREDICTED: four and a half LIM domains protein 2-like isoform X3 [Bombyx mori]
69	BGIBMGA014126	gi|512901593|ref|XP_004925173.1| PREDICTED: RING finger protein nhl-1-like isoform X1 [Bombyx mori] gi|512901597|ref|XP_004925174.1| PREDICTED: RING finger protein nhl-1-like isoform X2 [Bombyx mori]
69	BGIBMGA003326	gi|512902786|ref|XP_004925460.1| PREDICTED: uncharacterized protein LOC101738880 isoform X2 [Bombyx mori] gi|512902790|ref|XP_004925461.1| PREDICTED: uncharacterized protein LOC101738880 isoform X3 [Bombyx mori] gi|512902794|ref|XP_004925462.1| PREDICTED: uncharacterized protein LOC101738880 isoform X4 [Bombyx mori] gi|512902798|ref|XP_004925463.1| PREDICTED: uncharacterized protein LOC101738880 …
69	BGIBMGA007278	gi|512905068|ref|XP_004925853.1| PREDICTED: putative inorganic phosphate cotransporter-like [Bombyx mori]
69	BGIBMGA007280	gi|512905259|ref|XP_004925899.1| PREDICTED: putative inorganic phosphate cotransporter-like [Bombyx mori]
69	BGIBMGA013638	gi|512907994|ref|XP_004926573.1| PREDICTED: synaptic vesicle 2-related protein-like [Bombyx mori]
69	BGIBMGA005722	gi|512909029|ref|XP_004926822.1| PREDICTED: endothelin-converting enzyme 1-like [Bombyx mori]
69	BGIBMGA012221	gi|512911580|ref|XP_004927448.1| PREDICTED: melanotransferrin-like [Bombyx mori]
69	BGIBMGA007324	gi|512911603|ref|XP_004927453.1| PREDICTED: homogentisate 1,2-dioxygenase-like [Bombyx mori]
69	BGIBMGA014428	gi|512912568|ref|XP_004927690.1| PREDICTED: collagenase-like [Bombyx mori]
69	BGIBMGA000896	gi|512913554|ref|XP_004927925.1| PREDICTED: zinc transporter 8-like [Bombyx mori]
69	BGIBMGA001491	gi|512920851|ref|XP_004929736.1| PREDICTED: chondroitin proteoglycan 2-like [Bombyx mori]
69	BGIBMGA001504	gi|512920899|ref|XP_004929748.1| PREDICTED: chondroitin proteoglycan 2-like, partial [Bombyx mori]
69	BGIBMGA010741	gi|512934415|ref|XP_004933027.1| PREDICTED: facilitated trehalose transporter Tret1-like [Bombyx mori]
69	BGIBMGA014429	gi|61191881|gb|AAX39408.1| serine protease [Bombyx mandarina] gi|164470774|gb|ABY58153.1| serine protease [Bombyx mandarina]
69	BGIBMGA003322	no hints
69	BGIBMGA005970	no hints
70	BGIBMGA008861	gi|114051976|ref|NP_001040443.1| troponin C 25D [Bombyx mori] gi|95102914|gb|ABF51398.1| troponin C 25D [Bombyx mori] gi|168472701|gb|ACA24126.1| troponin C 25D [Bombyx mandarina]
70	BGIBMGA013700	gi|114052138|ref|NP_001040221.1| troponin T [Bombyx mori] gi|87248429|gb|ABD36267.1| troponin T [Bombyx mori]
70	BGIBMGA001201	gi|114052470|ref|NP_001040476.1| muscular protein 20 [Bombyx mori] gi|95103052|gb|ABF51467.1| muscular protein 20 [Bombyx mori]
70	BGIBMGA005786	gi|153791757|ref|NP_001093275.1| myo-inositol oxygenase [Bombyx mori] gi|95102966|gb|ABF51424.1| myo-inositol oxygenase [Bombyx mori]
70	BGIBMGA001202	gi|160333386|ref|NP_001103762.1| muscle LIM protein isoform 1 [Bombyx mori] gi|87248175|gb|ABD36140.1| muscle LIM protein [Bombyx mori]
70	BGIBMGA013756	gi|171740881|gb|ACB54935.1| chitin deacetylase [Helicoverpa armigera]
70	BGIBMGA001031	gi|225346691|gb|ACN86368.1| troponin I transcript variant A [Bombyx mandarina]
70	BGIBMGA001030	gi|225346693|gb|ACN86369.1| troponin I transcript variant B [Bombyx mandarina]
70	BGIBMGA000737	gi|389609045|dbj|BAM18134.1| unknown unsecreted protein [Papilio xuthus]
70	BGIBMGA005599	gi|512887474|ref|XP_004921931.1| PREDICTED: SLIT and NTRK-like protein 6-like [Bombyx mori]
70	BGIBMGA004801	gi|512894416|ref|XP_004923425.1| PREDICTED: zinc carboxypeptidase-like [Bombyx mori]
70	BGIBMGA004546	gi|512894841|ref|XP_004923527.1| PREDICTED: LOW QUALITY PROTEIN: twitchin-like [Bombyx mori]
70	BGIBMGA004547	gi|512894841|ref|XP_004923527.1| PREDICTED: LOW QUALITY PROTEIN: twitchin-like [Bombyx mori]
70	BGIBMGA012494	gi|512896883|ref|XP_004924018.1| PREDICTED: uncharacterized protein LOC101741905 isoform X1 [Bombyx mori]
70	BGIBMGA013816	gi|512898251|ref|XP_004924354.1| PREDICTED: hydroxylysine kinase-like [Bombyx mori]
70	BGIBMGA009088	gi|512898417|ref|XP_004924395.1| PREDICTED: uncharacterized protein LOC101737434 isoform X2 [Bombyx mori]
70	BGIBMGA007494	gi|512899603|ref|XP_004924686.1| PREDICTED: multidrug resistance protein 1A-like isoform X1 [Bombyx mori] gi|512899606|ref|XP_004924687.1| PREDICTED: multidrug resistance protein 1A-like isoform X2 [Bombyx mori]
70	BGIBMGA012680	gi|512900044|ref|XP_004924796.1| PREDICTED: four and a half LIM domains protein 2-like isoform X3 [Bombyx mori]
70	BGIBMGA014126	gi|512901593|ref|XP_004925173.1| PREDICTED: RING finger protein nhl-1-like isoform X1 [Bombyx mori] gi|512901597|ref|XP_004925174.1| PREDICTED: RING finger protein nhl-1-like isoform X2 [Bombyx mori]
70	BGIBMGA003326	gi|512902786|ref|XP_004925460.1| PREDICTED: uncharacterized protein LOC101738880 isoform X2 [Bombyx mori] gi|512902790|ref|XP_004925461.1| PREDICTED: uncharacterized protein LOC101738880 isoform X3 [Bombyx mori] gi|512902794|ref|XP_004925462.1| PREDICTED: uncharacterized protein LOC101738880 isoform X4 [Bombyx mori] gi|512902798|ref|XP_004925463.1| PREDICTED: uncharacterized protein LOC101738880 …
70	BGIBMGA007278	gi|512905068|ref|XP_004925853.1| PREDICTED: putative inorganic phosphate cotransporter-like [Bombyx mori]
70	BGIBMGA007280	gi|512905259|ref|XP_004925899.1| PREDICTED: putative inorganic phosphate cotransporter-like [Bombyx mori]
70	BGIBMGA014149	gi|512906413|ref|XP_004926190.1| PREDICTED: myrosinase 1-like [Bombyx mori]
70	BGIBMGA013638	gi|512907994|ref|XP_004926573.1| PREDICTED: synaptic vesicle 2-related protein-like [Bombyx mori]
70	BGIBMGA012221	gi|512911580|ref|XP_004927448.1| PREDICTED: melanotransferrin-like [Bombyx mori]
70	BGIBMGA007324	gi|512911603|ref|XP_004927453.1| PREDICTED: homogentisate 1,2-dioxygenase-like [Bombyx mori]
70	BGIBMGA014428	gi|512912568|ref|XP_004927690.1| PREDICTED: collagenase-like [Bombyx mori]
70	BGIBMGA000896	gi|512913554|ref|XP_004927925.1| PREDICTED: zinc transporter 8-like [Bombyx mori]
70	BGIBMGA001491	gi|512920851|ref|XP_004929736.1| PREDICTED: chondroitin proteoglycan 2-like [Bombyx mori]
70	BGIBMGA001504	gi|512920899|ref|XP_004929748.1| PREDICTED: chondroitin proteoglycan 2-like, partial [Bombyx mori]
70	BGIBMGA010741	gi|512934415|ref|XP_004933027.1| PREDICTED: facilitated trehalose transporter Tret1-like [Bombyx mori]
70	BGIBMGA014429	gi|61191881|gb|AAX39408.1| serine protease [Bombyx mandarina] gi|164470774|gb|ABY58153.1| serine protease [Bombyx mandarina]
70	BGIBMGA003322	no hints
70	BGIBMGA005970	no hints
71	BGIBMGA003458	gi|108872133|gb|EAT36358.1| AAEL011551-PA [Aedes aegypti]
71	BGIBMGA004865	gi|112983654|ref|NP_001036872.1| Bombyrin precursor [Bombyx mori]
71	BGIBMGA008861	gi|114051976|ref|NP_001040443.1| troponin C 25D [Bombyx mori] gi|95102914|gb|ABF51398.1| troponin C 25D [Bombyx mori] gi|168472701|gb|ACA24126.1| troponin C 25D [Bombyx mandarina]
71	BGIBMGA013700	gi|114052138|ref|NP_001040221.1| troponin T [Bombyx mori] gi|87248429|gb|ABD36267.1| troponin T [Bombyx mori]
71	BGIBMGA001201	gi|114052470|ref|NP_001040476.1| muscular protein 20 [Bombyx mori] gi|95103052|gb|ABF51467.1| muscular protein 20 [Bombyx mori]
71	BGIBMGA005786	gi|153791757|ref|NP_001093275.1| myo-inositol oxygenase [Bombyx mori] gi|95102966|gb|ABF51424.1| myo-inositol oxygenase [Bombyx mori]
71	BGIBMGA001202	gi|160333386|ref|NP_001103762.1| muscle LIM protein isoform 1 [Bombyx mori] gi|87248175|gb|ABD36140.1| muscle LIM protein [Bombyx mori]
71	BGIBMGA005024	gi|160425399|gb|ABX39543.1| single domain major allergen protein [Gonepteryx rhamni]
71	BGIBMGA001031	gi|225346691|gb|ACN86368.1| troponin I transcript variant A [Bombyx mandarina]
71	BGIBMGA001030	gi|225346693|gb|ACN86369.1| troponin I transcript variant B [Bombyx mandarina]
71	BGIBMGA000737	gi|389609045|dbj|BAM18134.1| unknown unsecreted protein [Papilio xuthus]
71	BGIBMGA005599	gi|512887474|ref|XP_004921931.1| PREDICTED: SLIT and NTRK-like protein 6-like [Bombyx mori]
71	BGIBMGA004546	gi|512894841|ref|XP_004923527.1| PREDICTED: LOW QUALITY PROTEIN: twitchin-like [Bombyx mori]
71	BGIBMGA004547	gi|512894841|ref|XP_004923527.1| PREDICTED: LOW QUALITY PROTEIN: twitchin-like [Bombyx mori]
71	BGIBMGA012494	gi|512896883|ref|XP_004924018.1| PREDICTED: uncharacterized protein LOC101741905 isoform X1 [Bombyx mori]
71	BGIBMGA009088	gi|512898417|ref|XP_004924395.1| PREDICTED: uncharacterized protein LOC101737434 isoform X2 [Bombyx mori]
71	BGIBMGA007494	gi|512899603|ref|XP_004924686.1| PREDICTED: multidrug resistance protein 1A-like isoform X1 [Bombyx mori] gi|512899606|ref|XP_004924687.1| PREDICTED: multidrug resistance protein 1A-like isoform X2 [Bombyx mori]
71	BGIBMGA012680	gi|512900044|ref|XP_004924796.1| PREDICTED: four and a half LIM domains protein 2-like isoform X3 [Bombyx mori]
71	BGIBMGA014126	gi|512901593|ref|XP_004925173.1| PREDICTED: RING finger protein nhl-1-like isoform X1 [Bombyx mori] gi|512901597|ref|XP_004925174.1| PREDICTED: RING finger protein nhl-1-like isoform X2 [Bombyx mori]
71	BGIBMGA012548	gi|512901857|ref|XP_004925235.1| PREDICTED: sphingomyelin phosphodiesterase-like [Bombyx mori]
71	BGIBMGA003326	gi|512902786|ref|XP_004925460.1| PREDICTED: uncharacterized protein LOC101738880 isoform X2 [Bombyx mori] gi|512902790|ref|XP_004925461.1| PREDICTED: uncharacterized protein LOC101738880 isoform X3 [Bombyx mori] gi|512902794|ref|XP_004925462.1| PREDICTED: uncharacterized protein LOC101738880 isoform X4 [Bombyx mori] gi|512902798|ref|XP_004925463.1| PREDICTED: uncharacterized protein LOC101738880 …
71	BGIBMGA007278	gi|512905068|ref|XP_004925853.1| PREDICTED: putative inorganic phosphate cotransporter-like [Bombyx mori]
71	BGIBMGA014149	gi|512906413|ref|XP_004926190.1| PREDICTED: myrosinase 1-like [Bombyx mori]
71	BGIBMGA012221	gi|512911580|ref|XP_004927448.1| PREDICTED: melanotransferrin-like [Bombyx mori]
71	BGIBMGA009199	gi|512911768|ref|XP_004927493.1| PREDICTED: organic cation transporter protein-like [Bombyx mori]
71	BGIBMGA014428	gi|512912568|ref|XP_004927690.1| PREDICTED: collagenase-like [Bombyx mori]
71	BGIBMGA000896	gi|512913554|ref|XP_004927925.1| PREDICTED: zinc transporter 8-like [Bombyx mori]
71	BGIBMGA001491	gi|512920851|ref|XP_004929736.1| PREDICTED: chondroitin proteoglycan 2-like [Bombyx mori]
71	BGIBMGA010741	gi|512934415|ref|XP_004933027.1| PREDICTED: facilitated trehalose transporter Tret1-like [Bombyx mori]
71	BGIBMGA014429	gi|61191881|gb|AAX39408.1| serine protease [Bombyx mandarina] gi|164470774|gb|ABY58153.1| serine protease [Bombyx mandarina]
71	BGIBMGA003322	no hints
71	BGIBMGA005970	no hints
71	BGIBMGA014298	no hints
72	BGIBMGA003458	gi|108872133|gb|EAT36358.1| AAEL011551-PA [Aedes aegypti]
72	BGIBMGA004865	gi|112983654|ref|NP_001036872.1| Bombyrin precursor [Bombyx mori]
72	BGIBMGA008861	gi|114051976|ref|NP_001040443.1| troponin C 25D [Bombyx mori] gi|95102914|gb|ABF51398.1| troponin C 25D [Bombyx mori] gi|168472701|gb|ACA24126.1| troponin C 25D [Bombyx mandarina]
72	BGIBMGA013700	gi|114052138|ref|NP_001040221.1| troponin T [Bombyx mori] gi|87248429|gb|ABD36267.1| troponin T [Bombyx mori]
72	BGIBMGA001201	gi|114052470|ref|NP_001040476.1| muscular protein 20 [Bombyx mori] gi|95103052|gb|ABF51467.1| muscular protein 20 [Bombyx mori]
72	BGIBMGA005786	gi|153791757|ref|NP_001093275.1| myo-inositol oxygenase [Bombyx mori] gi|95102966|gb|ABF51424.1| myo-inositol oxygenase [Bombyx mori]
72	BGIBMGA001202	gi|160333386|ref|NP_001103762.1| muscle LIM protein isoform 1 [Bombyx mori] gi|87248175|gb|ABD36140.1| muscle LIM protein [Bombyx mori]
72	BGIBMGA001031	gi|225346691|gb|ACN86368.1| troponin I transcript variant A [Bombyx mandarina]
72	BGIBMGA001030	gi|225346693|gb|ACN86369.1| troponin I transcript variant B [Bombyx mandarina]
72	BGIBMGA000737	gi|389609045|dbj|BAM18134.1| unknown unsecreted protein [Papilio xuthus]
72	BGIBMGA005599	gi|512887474|ref|XP_004921931.1| PREDICTED: SLIT and NTRK-like protein 6-like [Bombyx mori]
72	BGIBMGA004801	gi|512894416|ref|XP_004923425.1| PREDICTED: zinc carboxypeptidase-like [Bombyx mori]
72	BGIBMGA004546	gi|512894841|ref|XP_004923527.1| PREDICTED: LOW QUALITY PROTEIN: twitchin-like [Bombyx mori]
72	BGIBMGA004547	gi|512894841|ref|XP_004923527.1| PREDICTED: LOW QUALITY PROTEIN: twitchin-like [Bombyx mori]
72	BGIBMGA012494	gi|512896883|ref|XP_004924018.1| PREDICTED: uncharacterized protein LOC101741905 isoform X1 [Bombyx mori]
72	BGIBMGA009088	gi|512898417|ref|XP_004924395.1| PREDICTED: uncharacterized protein LOC101737434 isoform X2 [Bombyx mori]
72	BGIBMGA007494	gi|512899603|ref|XP_004924686.1| PREDICTED: multidrug resistance protein 1A-like isoform X1 [Bombyx mori] gi|512899606|ref|XP_004924687.1| PREDICTED: multidrug resistance protein 1A-like isoform X2 [Bombyx mori]
72	BGIBMGA012680	gi|512900044|ref|XP_004924796.1| PREDICTED: four and a half LIM domains protein 2-like isoform X3 [Bombyx mori]
72	BGIBMGA014126	gi|512901593|ref|XP_004925173.1| PREDICTED: RING finger protein nhl-1-like isoform X1 [Bombyx mori] gi|512901597|ref|XP_004925174.1| PREDICTED: RING finger protein nhl-1-like isoform X2 [Bombyx mori]
72	BGIBMGA012548	gi|512901857|ref|XP_004925235.1| PREDICTED: sphingomyelin phosphodiesterase-like [Bombyx mori]
72	BGIBMGA003326	gi|512902786|ref|XP_004925460.1| PREDICTED: uncharacterized protein LOC101738880 isoform X2 [Bombyx mori] gi|512902790|ref|XP_004925461.1| PREDICTED: uncharacterized protein LOC101738880 isoform X3 [Bombyx mori] gi|512902794|ref|XP_004925462.1| PREDICTED: uncharacterized protein LOC101738880 isoform X4 [Bombyx mori] gi|512902798|ref|XP_004925463.1| PREDICTED: uncharacterized protein LOC101738880 …
72	BGIBMGA007278	gi|512905068|ref|XP_004925853.1| PREDICTED: putative inorganic phosphate cotransporter-like [Bombyx mori]
72	BGIBMGA014149	gi|512906413|ref|XP_004926190.1| PREDICTED: myrosinase 1-like [Bombyx mori]
72	BGIBMGA012221	gi|512911580|ref|XP_004927448.1| PREDICTED: melanotransferrin-like [Bombyx mori]
72	BGIBMGA009199	gi|512911768|ref|XP_004927493.1| PREDICTED: organic cation transporter protein-like [Bombyx mori]
72	BGIBMGA014428	gi|512912568|ref|XP_004927690.1| PREDICTED: collagenase-like [Bombyx mori]
72	BGIBMGA000896	gi|512913554|ref|XP_004927925.1| PREDICTED: zinc transporter 8-like [Bombyx mori]
72	BGIBMGA001491	gi|512920851|ref|XP_004929736.1| PREDICTED: chondroitin proteoglycan 2-like [Bombyx mori]
72	BGIBMGA010741	gi|512934415|ref|XP_004933027.1| PREDICTED: facilitated trehalose transporter Tret1-like [Bombyx mori]
72	BGIBMGA014429	gi|61191881|gb|AAX39408.1| serine protease [Bombyx mandarina] gi|164470774|gb|ABY58153.1| serine protease [Bombyx mandarina]
72	BGIBMGA003322	no hints
72	BGIBMGA005970	no hints
72	BGIBMGA014298	no hints
73	BGIBMGA004865	gi|112983654|ref|NP_001036872.1| Bombyrin precursor [Bombyx mori]
73	BGIBMGA008861	gi|114051976|ref|NP_001040443.1| troponin C 25D [Bombyx mori] gi|95102914|gb|ABF51398.1| troponin C 25D [Bombyx mori] gi|168472701|gb|ACA24126.1| troponin C 25D [Bombyx mandarina]
73	BGIBMGA013700	gi|114052138|ref|NP_001040221.1| troponin T [Bombyx mori] gi|87248429|gb|ABD36267.1| troponin T [Bombyx mori]
73	BGIBMGA001201	gi|114052470|ref|NP_001040476.1| muscular protein 20 [Bombyx mori] gi|95103052|gb|ABF51467.1| muscular protein 20 [Bombyx mori]
73	BGIBMGA005786	gi|153791757|ref|NP_001093275.1| myo-inositol oxygenase [Bombyx mori] gi|95102966|gb|ABF51424.1| myo-inositol oxygenase [Bombyx mori]
73	BGIBMGA001202	gi|160333386|ref|NP_001103762.1| muscle LIM protein isoform 1 [Bombyx mori] gi|87248175|gb|ABD36140.1| muscle LIM protein [Bombyx mori]
73	BGIBMGA005024	gi|160425399|gb|ABX39543.1| single domain major allergen protein [Gonepteryx rhamni]
73	BGIBMGA001031	gi|225346691|gb|ACN86368.1| troponin I transcript variant A [Bombyx mandarina]
73	BGIBMGA001030	gi|225346693|gb|ACN86369.1| troponin I transcript variant B [Bombyx mandarina]
73	BGIBMGA007735	gi|357624813|gb|EHJ75445.1| ABC transporter family C protein ABCC2 [Danaus plexippus]
73	BGIBMGA000736	gi|389609045|dbj|BAM18134.1| unknown unsecreted protein [Papilio xuthus]
73	BGIBMGA000737	gi|389609045|dbj|BAM18134.1| unknown unsecreted protein [Papilio xuthus]
73	BGIBMGA005599	gi|512887474|ref|XP_004921931.1| PREDICTED: SLIT and NTRK-like protein 6-like [Bombyx mori]
73	BGIBMGA004546	gi|512894841|ref|XP_004923527.1| PREDICTED: LOW QUALITY PROTEIN: twitchin-like [Bombyx mori]
73	BGIBMGA004547	gi|512894841|ref|XP_004923527.1| PREDICTED: LOW QUALITY PROTEIN: twitchin-like [Bombyx mori]
73	BGIBMGA012494	gi|512896883|ref|XP_004924018.1| PREDICTED: uncharacterized protein LOC101741905 isoform X1 [Bombyx mori]
73	BGIBMGA009088	gi|512898417|ref|XP_004924395.1| PREDICTED: uncharacterized protein LOC101737434 isoform X2 [Bombyx mori]
73	BGIBMGA007494	gi|512899603|ref|XP_004924686.1| PREDICTED: multidrug resistance protein 1A-like isoform X1 [Bombyx mori] gi|512899606|ref|XP_004924687.1| PREDICTED: multidrug resistance protein 1A-like isoform X2 [Bombyx mori]
73	BGIBMGA012680	gi|512900044|ref|XP_004924796.1| PREDICTED: four and a half LIM domains protein 2-like isoform X3 [Bombyx mori]
73	BGIBMGA014126	gi|512901593|ref|XP_004925173.1| PREDICTED: RING finger protein nhl-1-like isoform X1 [Bombyx mori] gi|512901597|ref|XP_004925174.1| PREDICTED: RING finger protein nhl-1-like isoform X2 [Bombyx mori]
73	BGIBMGA012548	gi|512901857|ref|XP_004925235.1| PREDICTED: sphingomyelin phosphodiesterase-like [Bombyx mori]
73	BGIBMGA003326	gi|512902786|ref|XP_004925460.1| PREDICTED: uncharacterized protein LOC101738880 isoform X2 [Bombyx mori] gi|512902790|ref|XP_004925461.1| PREDICTED: uncharacterized protein LOC101738880 isoform X3 [Bombyx mori] gi|512902794|ref|XP_004925462.1| PREDICTED: uncharacterized protein LOC101738880 isoform X4 [Bombyx mori] gi|512902798|ref|XP_004925463.1| PREDICTED: uncharacterized protein LOC101738880 …
73	BGIBMGA007278	gi|512905068|ref|XP_004925853.1| PREDICTED: putative inorganic phosphate cotransporter-like [Bombyx mori]
73	BGIBMGA007280	gi|512905259|ref|XP_004925899.1| PREDICTED: putative inorganic phosphate cotransporter-like [Bombyx mori]
73	BGIBMGA013638	gi|512907994|ref|XP_004926573.1| PREDICTED: synaptic vesicle 2-related protein-like [Bombyx mori]
73	BGIBMGA012221	gi|512911580|ref|XP_004927448.1| PREDICTED: melanotransferrin-like [Bombyx mori]
73	BGIBMGA007324	gi|512911603|ref|XP_004927453.1| PREDICTED: homogentisate 1,2-dioxygenase-like [Bombyx mori]
73	BGIBMGA009199	gi|512911768|ref|XP_004927493.1| PREDICTED: organic cation transporter protein-like [Bombyx mori]
73	BGIBMGA014428	gi|512912568|ref|XP_004927690.1| PREDICTED: collagenase-like [Bombyx mori]
73	BGIBMGA000896	gi|512913554|ref|XP_004927925.1| PREDICTED: zinc transporter 8-like [Bombyx mori]
73	BGIBMGA001491	gi|512920851|ref|XP_004929736.1| PREDICTED: chondroitin proteoglycan 2-like [Bombyx mori]
73	BGIBMGA010741	gi|512934415|ref|XP_004933027.1| PREDICTED: facilitated trehalose transporter Tret1-like [Bombyx mori]
73	BGIBMGA000612	gi|531996938|gb|AGT62469.1| paramyosin, partial [Bicyclus anynana]
73	BGIBMGA014429	gi|61191881|gb|AAX39408.1| serine protease [Bombyx mandarina] gi|164470774|gb|ABY58153.1| serine protease [Bombyx mandarina]
73	AK382731	NA
73	BGIBMGA003322	no hints
73	BGIBMGA005970	no hints
73	BGIBMGA014298	no hints
74	BGIBMGA004865	gi|112983654|ref|NP_001036872.1| Bombyrin precursor [Bombyx mori]
74	BGIBMGA008861	gi|114051976|ref|NP_001040443.1| troponin C 25D [Bombyx mori] gi|95102914|gb|ABF51398.1| troponin C 25D [Bombyx mori] gi|168472701|gb|ACA24126.1| troponin C 25D [Bombyx mandarina]
74	BGIBMGA013700	gi|114052138|ref|NP_001040221.1| troponin T [Bombyx mori] gi|87248429|gb|ABD36267.1| troponin T [Bombyx mori]
74	BGIBMGA001201	gi|114052470|ref|NP_001040476.1| muscular protein 20 [Bombyx mori] gi|95103052|gb|ABF51467.1| muscular protein 20 [Bombyx mori]
74	BGIBMGA005786	gi|153791757|ref|NP_001093275.1| myo-inositol oxygenase [Bombyx mori] gi|95102966|gb|ABF51424.1| myo-inositol oxygenase [Bombyx mori]
74	BGIBMGA001202	gi|160333386|ref|NP_001103762.1| muscle LIM protein isoform 1 [Bombyx mori] gi|87248175|gb|ABD36140.1| muscle LIM protein [Bombyx mori]
74	BGIBMGA001031	gi|225346691|gb|ACN86368.1| troponin I transcript variant A [Bombyx mandarina]
74	BGIBMGA001030	gi|225346693|gb|ACN86369.1| troponin I transcript variant B [Bombyx mandarina]
74	BGIBMGA000737	gi|389609045|dbj|BAM18134.1| unknown unsecreted protein [Papilio xuthus]
74	BGIBMGA005599	gi|512887474|ref|XP_004921931.1| PREDICTED: SLIT and NTRK-like protein 6-like [Bombyx mori]
74	BGIBMGA004801	gi|512894416|ref|XP_004923425.1| PREDICTED: zinc carboxypeptidase-like [Bombyx mori]
74	BGIBMGA004546	gi|512894841|ref|XP_004923527.1| PREDICTED: LOW QUALITY PROTEIN: twitchin-like [Bombyx mori]
74	BGIBMGA004547	gi|512894841|ref|XP_004923527.1| PREDICTED: LOW QUALITY PROTEIN: twitchin-like [Bombyx mori]
74	BGIBMGA012494	gi|512896883|ref|XP_004924018.1| PREDICTED: uncharacterized protein LOC101741905 isoform X1 [Bombyx mori]
74	BGIBMGA013816	gi|512898251|ref|XP_004924354.1| PREDICTED: hydroxylysine kinase-like [Bombyx mori]
74	BGIBMGA009088	gi|512898417|ref|XP_004924395.1| PREDICTED: uncharacterized protein LOC101737434 isoform X2 [Bombyx mori]
74	BGIBMGA007494	gi|512899603|ref|XP_004924686.1| PREDICTED: multidrug resistance protein 1A-like isoform X1 [Bombyx mori] gi|512899606|ref|XP_004924687.1| PREDICTED: multidrug resistance protein 1A-like isoform X2 [Bombyx mori]
74	BGIBMGA012680	gi|512900044|ref|XP_004924796.1| PREDICTED: four and a half LIM domains protein 2-like isoform X3 [Bombyx mori]
74	BGIBMGA014126	gi|512901593|ref|XP_004925173.1| PREDICTED: RING finger protein nhl-1-like isoform X1 [Bombyx mori] gi|512901597|ref|XP_004925174.1| PREDICTED: RING finger protein nhl-1-like isoform X2 [Bombyx mori]
74	BGIBMGA012548	gi|512901857|ref|XP_004925235.1| PREDICTED: sphingomyelin phosphodiesterase-like [Bombyx mori]
74	BGIBMGA003326	gi|512902786|ref|XP_004925460.1| PREDICTED: uncharacterized protein LOC101738880 isoform X2 [Bombyx mori] gi|512902790|ref|XP_004925461.1| PREDICTED: uncharacterized protein LOC101738880 isoform X3 [Bombyx mori] gi|512902794|ref|XP_004925462.1| PREDICTED: uncharacterized protein LOC101738880 isoform X4 [Bombyx mori] gi|512902798|ref|XP_004925463.1| PREDICTED: uncharacterized protein LOC101738880 …
74	BGIBMGA007278	gi|512905068|ref|XP_004925853.1| PREDICTED: putative inorganic phosphate cotransporter-like [Bombyx mori]
74	BGIBMGA007280	gi|512905259|ref|XP_004925899.1| PREDICTED: putative inorganic phosphate cotransporter-like [Bombyx mori]
74	BGIBMGA013638	gi|512907994|ref|XP_004926573.1| PREDICTED: synaptic vesicle 2-related protein-like [Bombyx mori]
74	BGIBMGA005722	gi|512909029|ref|XP_004926822.1| PREDICTED: endothelin-converting enzyme 1-like [Bombyx mori]
74	BGIBMGA012221	gi|512911580|ref|XP_004927448.1| PREDICTED: melanotransferrin-like [Bombyx mori]
74	BGIBMGA007324	gi|512911603|ref|XP_004927453.1| PREDICTED: homogentisate 1,2-dioxygenase-like [Bombyx mori]
74	BGIBMGA009199	gi|512911768|ref|XP_004927493.1| PREDICTED: organic cation transporter protein-like [Bombyx mori]
74	BGIBMGA014428	gi|512912568|ref|XP_004927690.1| PREDICTED: collagenase-like [Bombyx mori]
74	BGIBMGA000896	gi|512913554|ref|XP_004927925.1| PREDICTED: zinc transporter 8-like [Bombyx mori]
74	BGIBMGA001491	gi|512920851|ref|XP_004929736.1| PREDICTED: chondroitin proteoglycan 2-like [Bombyx mori]
74	BGIBMGA001504	gi|512920899|ref|XP_004929748.1| PREDICTED: chondroitin proteoglycan 2-like, partial [Bombyx mori]
74	BGIBMGA010741	gi|512934415|ref|XP_004933027.1| PREDICTED: facilitated trehalose transporter Tret1-like [Bombyx mori]
74	BGIBMGA014429	gi|61191881|gb|AAX39408.1| serine protease [Bombyx mandarina] gi|164470774|gb|ABY58153.1| serine protease [Bombyx mandarina]
74	BGIBMGA003322	no hints
74	BGIBMGA005970	no hints
74	BGIBMGA014298	no hints
75	BGIBMGA004865	gi|112983654|ref|NP_001036872.1| Bombyrin precursor [Bombyx mori]
75	BGIBMGA008861	gi|114051976|ref|NP_001040443.1| troponin C 25D [Bombyx mori] gi|95102914|gb|ABF51398.1| troponin C 25D [Bombyx mori] gi|168472701|gb|ACA24126.1| troponin C 25D [Bombyx mandarina]
75	BGIBMGA013700	gi|114052138|ref|NP_001040221.1| troponin T [Bombyx mori] gi|87248429|gb|ABD36267.1| troponin T [Bombyx mori]
75	BGIBMGA001201	gi|114052470|ref|NP_001040476.1| muscular protein 20 [Bombyx mori] gi|95103052|gb|ABF51467.1| muscular protein 20 [Bombyx mori]
75	BGIBMGA005786	gi|153791757|ref|NP_001093275.1| myo-inositol oxygenase [Bombyx mori] gi|95102966|gb|ABF51424.1| myo-inositol oxygenase [Bombyx mori]
75	BGIBMGA001202	gi|160333386|ref|NP_001103762.1| muscle LIM protein isoform 1 [Bombyx mori] gi|87248175|gb|ABD36140.1| muscle LIM protein [Bombyx mori]
75	BGIBMGA001031	gi|225346691|gb|ACN86368.1| troponin I transcript variant A [Bombyx mandarina]
75	BGIBMGA001030	gi|225346693|gb|ACN86369.1| troponin I transcript variant B [Bombyx mandarina]
75	BGIBMGA000737	gi|389609045|dbj|BAM18134.1| unknown unsecreted protein [Papilio xuthus]
75	BGIBMGA005599	gi|512887474|ref|XP_004921931.1| PREDICTED: SLIT and NTRK-like protein 6-like [Bombyx mori]
75	BGIBMGA004801	gi|512894416|ref|XP_004923425.1| PREDICTED: zinc carboxypeptidase-like [Bombyx mori]
75	BGIBMGA004546	gi|512894841|ref|XP_004923527.1| PREDICTED: LOW QUALITY PROTEIN: twitchin-like [Bombyx mori]
75	BGIBMGA004547	gi|512894841|ref|XP_004923527.1| PREDICTED: LOW QUALITY PROTEIN: twitchin-like [Bombyx mori]
75	BGIBMGA012494	gi|512896883|ref|XP_004924018.1| PREDICTED: uncharacterized protein LOC101741905 isoform X1 [Bombyx mori]
75	BGIBMGA013816	gi|512898251|ref|XP_004924354.1| PREDICTED: hydroxylysine kinase-like [Bombyx mori]
75	BGIBMGA009088	gi|512898417|ref|XP_004924395.1| PREDICTED: uncharacterized protein LOC101737434 isoform X2 [Bombyx mori]
75	BGIBMGA007494	gi|512899603|ref|XP_004924686.1| PREDICTED: multidrug resistance protein 1A-like isoform X1 [Bombyx mori] gi|512899606|ref|XP_004924687.1| PREDICTED: multidrug resistance protein 1A-like isoform X2 [Bombyx mori]
75	BGIBMGA012680	gi|512900044|ref|XP_004924796.1| PREDICTED: four and a half LIM domains protein 2-like isoform X3 [Bombyx mori]
75	BGIBMGA014126	gi|512901593|ref|XP_004925173.1| PREDICTED: RING finger protein nhl-1-like isoform X1 [Bombyx mori] gi|512901597|ref|XP_004925174.1| PREDICTED: RING finger protein nhl-1-like isoform X2 [Bombyx mori]
75	BGIBMGA012548	gi|512901857|ref|XP_004925235.1| PREDICTED: sphingomyelin phosphodiesterase-like [Bombyx mori]
75	BGIBMGA003326	gi|512902786|ref|XP_004925460.1| PREDICTED: uncharacterized protein LOC101738880 isoform X2 [Bombyx mori] gi|512902790|ref|XP_004925461.1| PREDICTED: uncharacterized protein LOC101738880 isoform X3 [Bombyx mori] gi|512902794|ref|XP_004925462.1| PREDICTED: uncharacterized protein LOC101738880 isoform X4 [Bombyx mori] gi|512902798|ref|XP_004925463.1| PREDICTED: uncharacterized protein LOC101738880 …
75	BGIBMGA007278	gi|512905068|ref|XP_004925853.1| PREDICTED: putative inorganic phosphate cotransporter-like [Bombyx mori]
75	BGIBMGA007280	gi|512905259|ref|XP_004925899.1| PREDICTED: putative inorganic phosphate cotransporter-like [Bombyx mori]
75	BGIBMGA014149	gi|512906413|ref|XP_004926190.1| PREDICTED: myrosinase 1-like [Bombyx mori]
75	BGIBMGA013638	gi|512907994|ref|XP_004926573.1| PREDICTED: synaptic vesicle 2-related protein-like [Bombyx mori]
75	BGIBMGA012221	gi|512911580|ref|XP_004927448.1| PREDICTED: melanotransferrin-like [Bombyx mori]
75	BGIBMGA007324	gi|512911603|ref|XP_004927453.1| PREDICTED: homogentisate 1,2-dioxygenase-like [Bombyx mori]
75	BGIBMGA009199	gi|512911768|ref|XP_004927493.1| PREDICTED: organic cation transporter protein-like [Bombyx mori]
75	BGIBMGA014428	gi|512912568|ref|XP_004927690.1| PREDICTED: collagenase-like [Bombyx mori]
75	BGIBMGA000896	gi|512913554|ref|XP_004927925.1| PREDICTED: zinc transporter 8-like [Bombyx mori]
75	BGIBMGA001491	gi|512920851|ref|XP_004929736.1| PREDICTED: chondroitin proteoglycan 2-like [Bombyx mori]
75	BGIBMGA001504	gi|512920899|ref|XP_004929748.1| PREDICTED: chondroitin proteoglycan 2-like, partial [Bombyx mori]
75	BGIBMGA010741	gi|512934415|ref|XP_004933027.1| PREDICTED: facilitated trehalose transporter Tret1-like [Bombyx mori]
75	BGIBMGA014429	gi|61191881|gb|AAX39408.1| serine protease [Bombyx mandarina] gi|164470774|gb|ABY58153.1| serine protease [Bombyx mandarina]
75	BGIBMGA003322	no hints
75	BGIBMGA005970	no hints
75	BGIBMGA014298	no hints
76	BGIBMGA004865	gi|112983654|ref|NP_001036872.1| Bombyrin precursor [Bombyx mori]
76	BGIBMGA008861	gi|114051976|ref|NP_001040443.1| troponin C 25D [Bombyx mori] gi|95102914|gb|ABF51398.1| troponin C 25D [Bombyx mori] gi|168472701|gb|ACA24126.1| troponin C 25D [Bombyx mandarina]
76	BGIBMGA013700	gi|114052138|ref|NP_001040221.1| troponin T [Bombyx mori] gi|87248429|gb|ABD36267.1| troponin T [Bombyx mori]
76	BGIBMGA001201	gi|114052470|ref|NP_001040476.1| muscular protein 20 [Bombyx mori] gi|95103052|gb|ABF51467.1| muscular protein 20 [Bombyx mori]
76	BGIBMGA005786	gi|153791757|ref|NP_001093275.1| myo-inositol oxygenase [Bombyx mori] gi|95102966|gb|ABF51424.1| myo-inositol oxygenase [Bombyx mori]
76	BGIBMGA001202	gi|160333386|ref|NP_001103762.1| muscle LIM protein isoform 1 [Bombyx mori] gi|87248175|gb|ABD36140.1| muscle LIM protein [Bombyx mori]
76	BGIBMGA005024	gi|160425399|gb|ABX39543.1| single domain major allergen protein [Gonepteryx rhamni]
76	BGIBMGA001031	gi|225346691|gb|ACN86368.1| troponin I transcript variant A [Bombyx mandarina]
76	BGIBMGA001030	gi|225346693|gb|ACN86369.1| troponin I transcript variant B [Bombyx mandarina]
76	BGIBMGA000736	gi|389609045|dbj|BAM18134.1| unknown unsecreted protein [Papilio xuthus]
76	BGIBMGA000737	gi|389609045|dbj|BAM18134.1| unknown unsecreted protein [Papilio xuthus]
76	BGIBMGA005599	gi|512887474|ref|XP_004921931.1| PREDICTED: SLIT and NTRK-like protein 6-like [Bombyx mori]
76	BGIBMGA004546	gi|512894841|ref|XP_004923527.1| PREDICTED: LOW QUALITY PROTEIN: twitchin-like [Bombyx mori]
76	BGIBMGA004547	gi|512894841|ref|XP_004923527.1| PREDICTED: LOW QUALITY PROTEIN: twitchin-like [Bombyx mori]
76	BGIBMGA012494	gi|512896883|ref|XP_004924018.1| PREDICTED: uncharacterized protein LOC101741905 isoform X1 [Bombyx mori]
76	BGIBMGA009088	gi|512898417|ref|XP_004924395.1| PREDICTED: uncharacterized protein LOC101737434 isoform X2 [Bombyx mori]
76	BGIBMGA007494	gi|512899603|ref|XP_004924686.1| PREDICTED: multidrug resistance protein 1A-like isoform X1 [Bombyx mori] gi|512899606|ref|XP_004924687.1| PREDICTED: multidrug resistance protein 1A-like isoform X2 [Bombyx mori]
76	BGIBMGA012680	gi|512900044|ref|XP_004924796.1| PREDICTED: four and a half LIM domains protein 2-like isoform X3 [Bombyx mori]
76	BGIBMGA014126	gi|512901593|ref|XP_004925173.1| PREDICTED: RING finger protein nhl-1-like isoform X1 [Bombyx mori] gi|512901597|ref|XP_004925174.1| PREDICTED: RING finger protein nhl-1-like isoform X2 [Bombyx mori]
76	BGIBMGA012548	gi|512901857|ref|XP_004925235.1| PREDICTED: sphingomyelin phosphodiesterase-like [Bombyx mori]
76	BGIBMGA003326	gi|512902786|ref|XP_004925460.1| PREDICTED: uncharacterized protein LOC101738880 isoform X2 [Bombyx mori] gi|512902790|ref|XP_004925461.1| PREDICTED: uncharacterized protein LOC101738880 isoform X3 [Bombyx mori] gi|512902794|ref|XP_004925462.1| PREDICTED: uncharacterized protein LOC101738880 isoform X4 [Bombyx mori] gi|512902798|ref|XP_004925463.1| PREDICTED: uncharacterized protein LOC101738880 …
76	BGIBMGA007278	gi|512905068|ref|XP_004925853.1| PREDICTED: putative inorganic phosphate cotransporter-like [Bombyx mori]
76	BGIBMGA007280	gi|512905259|ref|XP_004925899.1| PREDICTED: putative inorganic phosphate cotransporter-like [Bombyx mori]
76	BGIBMGA013638	gi|512907994|ref|XP_004926573.1| PREDICTED: synaptic vesicle 2-related protein-like [Bombyx mori]
76	BGIBMGA005722	gi|512909029|ref|XP_004926822.1| PREDICTED: endothelin-converting enzyme 1-like [Bombyx mori]
76	BGIBMGA012221	gi|512911580|ref|XP_004927448.1| PREDICTED: melanotransferrin-like [Bombyx mori]
76	BGIBMGA007324	gi|512911603|ref|XP_004927453.1| PREDICTED: homogentisate 1,2-dioxygenase-like [Bombyx mori]
76	BGIBMGA009199	gi|512911768|ref|XP_004927493.1| PREDICTED: organic cation transporter protein-like [Bombyx mori]
76	BGIBMGA014428	gi|512912568|ref|XP_004927690.1| PREDICTED: collagenase-like [Bombyx mori]
76	BGIBMGA000896	gi|512913554|ref|XP_004927925.1| PREDICTED: zinc transporter 8-like [Bombyx mori]
76	BGIBMGA008514	gi|512915582|ref|XP_004928424.1| PREDICTED: transmembrane protease serine 9-like [Bombyx mori]
76	BGIBMGA001491	gi|512920851|ref|XP_004929736.1| PREDICTED: chondroitin proteoglycan 2-like [Bombyx mori]
76	BGIBMGA001504	gi|512920899|ref|XP_004929748.1| PREDICTED: chondroitin proteoglycan 2-like, partial [Bombyx mori]
76	BGIBMGA010741	gi|512934415|ref|XP_004933027.1| PREDICTED: facilitated trehalose transporter Tret1-like [Bombyx mori]
76	BGIBMGA014429	gi|61191881|gb|AAX39408.1| serine protease [Bombyx mandarina] gi|164470774|gb|ABY58153.1| serine protease [Bombyx mandarina]
76	BGIBMGA003322	no hints
76	BGIBMGA005970	no hints
76	BGIBMGA014298	no hints
77	BGIBMGA004865	gi|112983654|ref|NP_001036872.1| Bombyrin precursor [Bombyx mori]
77	BGIBMGA008861	gi|114051976|ref|NP_001040443.1| troponin C 25D [Bombyx mori] gi|95102914|gb|ABF51398.1| troponin C 25D [Bombyx mori] gi|168472701|gb|ACA24126.1| troponin C 25D [Bombyx mandarina]
77	BGIBMGA013700	gi|114052138|ref|NP_001040221.1| troponin T [Bombyx mori] gi|87248429|gb|ABD36267.1| troponin T [Bombyx mori]
77	BGIBMGA001201	gi|114052470|ref|NP_001040476.1| muscular protein 20 [Bombyx mori] gi|95103052|gb|ABF51467.1| muscular protein 20 [Bombyx mori]
77	BGIBMGA005786	gi|153791757|ref|NP_001093275.1| myo-inositol oxygenase [Bombyx mori] gi|95102966|gb|ABF51424.1| myo-inositol oxygenase [Bombyx mori]
77	BGIBMGA001202	gi|160333386|ref|NP_001103762.1| muscle LIM protein isoform 1 [Bombyx mori] gi|87248175|gb|ABD36140.1| muscle LIM protein [Bombyx mori]
77	BGIBMGA001031	gi|225346691|gb|ACN86368.1| troponin I transcript variant A [Bombyx mandarina]
77	BGIBMGA001030	gi|225346693|gb|ACN86369.1| troponin I transcript variant B [Bombyx mandarina]
77	BGIBMGA000736	gi|389609045|dbj|BAM18134.1| unknown unsecreted protein [Papilio xuthus]
77	BGIBMGA000737	gi|389609045|dbj|BAM18134.1| unknown unsecreted protein [Papilio xuthus]
77	BGIBMGA005599	gi|512887474|ref|XP_004921931.1| PREDICTED: SLIT and NTRK-like protein 6-like [Bombyx mori]
77	BGIBMGA004546	gi|512894841|ref|XP_004923527.1| PREDICTED: LOW QUALITY PROTEIN: twitchin-like [Bombyx mori]
77	BGIBMGA004547	gi|512894841|ref|XP_004923527.1| PREDICTED: LOW QUALITY PROTEIN: twitchin-like [Bombyx mori]
77	BGIBMGA012494	gi|512896883|ref|XP_004924018.1| PREDICTED: uncharacterized protein LOC101741905 isoform X1 [Bombyx mori]
77	BGIBMGA013816	gi|512898251|ref|XP_004924354.1| PREDICTED: hydroxylysine kinase-like [Bombyx mori]
77	BGIBMGA009088	gi|512898417|ref|XP_004924395.1| PREDICTED: uncharacterized protein LOC101737434 isoform X2 [Bombyx mori]
77	BGIBMGA007494	gi|512899603|ref|XP_004924686.1| PREDICTED: multidrug resistance protein 1A-like isoform X1 [Bombyx mori] gi|512899606|ref|XP_004924687.1| PREDICTED: multidrug resistance protein 1A-like isoform X2 [Bombyx mori]
77	BGIBMGA012680	gi|512900044|ref|XP_004924796.1| PREDICTED: four and a half LIM domains protein 2-like isoform X3 [Bombyx mori]
77	BGIBMGA014126	gi|512901593|ref|XP_004925173.1| PREDICTED: RING finger protein nhl-1-like isoform X1 [Bombyx mori] gi|512901597|ref|XP_004925174.1| PREDICTED: RING finger protein nhl-1-like isoform X2 [Bombyx mori]
77	BGIBMGA012548	gi|512901857|ref|XP_004925235.1| PREDICTED: sphingomyelin phosphodiesterase-like [Bombyx mori]
77	BGIBMGA003326	gi|512902786|ref|XP_004925460.1| PREDICTED: uncharacterized protein LOC101738880 isoform X2 [Bombyx mori] gi|512902790|ref|XP_004925461.1| PREDICTED: uncharacterized protein LOC101738880 isoform X3 [Bombyx mori] gi|512902794|ref|XP_004925462.1| PREDICTED: uncharacterized protein LOC101738880 isoform X4 [Bombyx mori] gi|512902798|ref|XP_004925463.1| PREDICTED: uncharacterized protein LOC101738880 …
77	BGIBMGA007278	gi|512905068|ref|XP_004925853.1| PREDICTED: putative inorganic phosphate cotransporter-like [Bombyx mori]
77	BGIBMGA007280	gi|512905259|ref|XP_004925899.1| PREDICTED: putative inorganic phosphate cotransporter-like [Bombyx mori]
77	BGIBMGA013638	gi|512907994|ref|XP_004926573.1| PREDICTED: synaptic vesicle 2-related protein-like [Bombyx mori]
77	BGIBMGA005722	gi|512909029|ref|XP_004926822.1| PREDICTED: endothelin-converting enzyme 1-like [Bombyx mori]
77	BGIBMGA012221	gi|512911580|ref|XP_004927448.1| PREDICTED: melanotransferrin-like [Bombyx mori]
77	BGIBMGA007324	gi|512911603|ref|XP_004927453.1| PREDICTED: homogentisate 1,2-dioxygenase-like [Bombyx mori]
77	BGIBMGA009199	gi|512911768|ref|XP_004927493.1| PREDICTED: organic cation transporter protein-like [Bombyx mori]
77	BGIBMGA014428	gi|512912568|ref|XP_004927690.1| PREDICTED: collagenase-like [Bombyx mori]
77	BGIBMGA000896	gi|512913554|ref|XP_004927925.1| PREDICTED: zinc transporter 8-like [Bombyx mori]
77	BGIBMGA008514	gi|512915582|ref|XP_004928424.1| PREDICTED: transmembrane protease serine 9-like [Bombyx mori]
77	BGIBMGA001491	gi|512920851|ref|XP_004929736.1| PREDICTED: chondroitin proteoglycan 2-like [Bombyx mori]
77	BGIBMGA001504	gi|512920899|ref|XP_004929748.1| PREDICTED: chondroitin proteoglycan 2-like, partial [Bombyx mori]
77	BGIBMGA010741	gi|512934415|ref|XP_004933027.1| PREDICTED: facilitated trehalose transporter Tret1-like [Bombyx mori]
77	BGIBMGA014429	gi|61191881|gb|AAX39408.1| serine protease [Bombyx mandarina] gi|164470774|gb|ABY58153.1| serine protease [Bombyx mandarina]
77	BGIBMGA003322	no hints
77	BGIBMGA005970	no hints
77	BGIBMGA014298	no hints
78	BGIBMGA004865	gi|112983654|ref|NP_001036872.1| Bombyrin precursor [Bombyx mori]
78	BGIBMGA008861	gi|114051976|ref|NP_001040443.1| troponin C 25D [Bombyx mori] gi|95102914|gb|ABF51398.1| troponin C 25D [Bombyx mori] gi|168472701|gb|ACA24126.1| troponin C 25D [Bombyx mandarina]
78	BGIBMGA013700	gi|114052138|ref|NP_001040221.1| troponin T [Bombyx mori] gi|87248429|gb|ABD36267.1| troponin T [Bombyx mori]
78	BGIBMGA001201	gi|114052470|ref|NP_001040476.1| muscular protein 20 [Bombyx mori] gi|95103052|gb|ABF51467.1| muscular protein 20 [Bombyx mori]
78	BGIBMGA005786	gi|153791757|ref|NP_001093275.1| myo-inositol oxygenase [Bombyx mori] gi|95102966|gb|ABF51424.1| myo-inositol oxygenase [Bombyx mori]
78	BGIBMGA001202	gi|160333386|ref|NP_001103762.1| muscle LIM protein isoform 1 [Bombyx mori] gi|87248175|gb|ABD36140.1| muscle LIM protein [Bombyx mori]
78	BGIBMGA005024	gi|160425399|gb|ABX39543.1| single domain major allergen protein [Gonepteryx rhamni]
78	BGIBMGA001031	gi|225346691|gb|ACN86368.1| troponin I transcript variant A [Bombyx mandarina]
78	BGIBMGA001030	gi|225346693|gb|ACN86369.1| troponin I transcript variant B [Bombyx mandarina]
78	BGIBMGA000737	gi|389609045|dbj|BAM18134.1| unknown unsecreted protein [Papilio xuthus]
78	BGIBMGA005599	gi|512887474|ref|XP_004921931.1| PREDICTED: SLIT and NTRK-like protein 6-like [Bombyx mori]
78	BGIBMGA004546	gi|512894841|ref|XP_004923527.1| PREDICTED: LOW QUALITY PROTEIN: twitchin-like [Bombyx mori]
78	BGIBMGA004547	gi|512894841|ref|XP_004923527.1| PREDICTED: LOW QUALITY PROTEIN: twitchin-like [Bombyx mori]
78	BGIBMGA012494	gi|512896883|ref|XP_004924018.1| PREDICTED: uncharacterized protein LOC101741905 isoform X1 [Bombyx mori]
78	BGIBMGA009088	gi|512898417|ref|XP_004924395.1| PREDICTED: uncharacterized protein LOC101737434 isoform X2 [Bombyx mori]
78	BGIBMGA007494	gi|512899603|ref|XP_004924686.1| PREDICTED: multidrug resistance protein 1A-like isoform X1 [Bombyx mori] gi|512899606|ref|XP_004924687.1| PREDICTED: multidrug resistance protein 1A-like isoform X2 [Bombyx mori]
78	BGIBMGA012680	gi|512900044|ref|XP_004924796.1| PREDICTED: four and a half LIM domains protein 2-like isoform X3 [Bombyx mori]
78	BGIBMGA014126	gi|512901593|ref|XP_004925173.1| PREDICTED: RING finger protein nhl-1-like isoform X1 [Bombyx mori] gi|512901597|ref|XP_004925174.1| PREDICTED: RING finger protein nhl-1-like isoform X2 [Bombyx mori]
78	BGIBMGA012548	gi|512901857|ref|XP_004925235.1| PREDICTED: sphingomyelin phosphodiesterase-like [Bombyx mori]
78	BGIBMGA003326	gi|512902786|ref|XP_004925460.1| PREDICTED: uncharacterized protein LOC101738880 isoform X2 [Bombyx mori] gi|512902790|ref|XP_004925461.1| PREDICTED: uncharacterized protein LOC101738880 isoform X3 [Bombyx mori] gi|512902794|ref|XP_004925462.1| PREDICTED: uncharacterized protein LOC101738880 isoform X4 [Bombyx mori] gi|512902798|ref|XP_004925463.1| PREDICTED: uncharacterized protein LOC101738880 …
78	BGIBMGA007278	gi|512905068|ref|XP_004925853.1| PREDICTED: putative inorganic phosphate cotransporter-like [Bombyx mori]
78	BGIBMGA007280	gi|512905259|ref|XP_004925899.1| PREDICTED: putative inorganic phosphate cotransporter-like [Bombyx mori]
78	BGIBMGA014149	gi|512906413|ref|XP_004926190.1| PREDICTED: myrosinase 1-like [Bombyx mori]
78	BGIBMGA013638	gi|512907994|ref|XP_004926573.1| PREDICTED: synaptic vesicle 2-related protein-like [Bombyx mori]
78	BGIBMGA012221	gi|512911580|ref|XP_004927448.1| PREDICTED: melanotransferrin-like [Bombyx mori]
78	BGIBMGA009199	gi|512911768|ref|XP_004927493.1| PREDICTED: organic cation transporter protein-like [Bombyx mori]
78	BGIBMGA014428	gi|512912568|ref|XP_004927690.1| PREDICTED: collagenase-like [Bombyx mori]
78	BGIBMGA000896	gi|512913554|ref|XP_004927925.1| PREDICTED: zinc transporter 8-like [Bombyx mori]
78	BGIBMGA001276	gi|512913741|ref|XP_004927968.1| PREDICTED: cytochrome P450 CYP12A2-like isoform X1 [Bombyx mori] gi|433339062|dbj|BAM73885.1| cytochrome P450 [Bombyx mori] gi|433339071|dbj|BAM73888.1| cytochrome P450 [Bombyx mori]
78	BGIBMGA001491	gi|512920851|ref|XP_004929736.1| PREDICTED: chondroitin proteoglycan 2-like [Bombyx mori]
78	BGIBMGA011320	gi|512925301|ref|XP_004930805.1| PREDICTED: leucine-rich repeat-containing protein 70-like [Bombyx mori]
78	BGIBMGA010741	gi|512934415|ref|XP_004933027.1| PREDICTED: facilitated trehalose transporter Tret1-like [Bombyx mori]
78	BGIBMGA000065	gi|512939991|ref|XP_004934367.1| PREDICTED: cystathionine beta-synthase-like isoform X2 [Bombyx mori]
78	BGIBMGA000612	gi|531996938|gb|AGT62469.1| paramyosin, partial [Bicyclus anynana]
78	BGIBMGA014429	gi|61191881|gb|AAX39408.1| serine protease [Bombyx mandarina] gi|164470774|gb|ABY58153.1| serine protease [Bombyx mandarina]
78	AK382731	NA
78	BGIBMGA003322	no hints
78	BGIBMGA005970	no hints
78	BGIBMGA014298	no hints
79	BGIBMGA004865	gi|112983654|ref|NP_001036872.1| Bombyrin precursor [Bombyx mori]
79	BGIBMGA008861	gi|114051976|ref|NP_001040443.1| troponin C 25D [Bombyx mori] gi|95102914|gb|ABF51398.1| troponin C 25D [Bombyx mori] gi|168472701|gb|ACA24126.1| troponin C 25D [Bombyx mandarina]
79	BGIBMGA013700	gi|114052138|ref|NP_001040221.1| troponin T [Bombyx mori] gi|87248429|gb|ABD36267.1| troponin T [Bombyx mori]
79	BGIBMGA001201	gi|114052470|ref|NP_001040476.1| muscular protein 20 [Bombyx mori] gi|95103052|gb|ABF51467.1| muscular protein 20 [Bombyx mori]
79	BGIBMGA005786	gi|153791757|ref|NP_001093275.1| myo-inositol oxygenase [Bombyx mori] gi|95102966|gb|ABF51424.1| myo-inositol oxygenase [Bombyx mori]
79	BGIBMGA001202	gi|160333386|ref|NP_001103762.1| muscle LIM protein isoform 1 [Bombyx mori] gi|87248175|gb|ABD36140.1| muscle LIM protein [Bombyx mori]
79	BGIBMGA001031	gi|225346691|gb|ACN86368.1| troponin I transcript variant A [Bombyx mandarina]
79	BGIBMGA001030	gi|225346693|gb|ACN86369.1| troponin I transcript variant B [Bombyx mandarina]
79	BGIBMGA000736	gi|389609045|dbj|BAM18134.1| unknown unsecreted protein [Papilio xuthus]
79	BGIBMGA000737	gi|389609045|dbj|BAM18134.1| unknown unsecreted protein [Papilio xuthus]
79	BGIBMGA005599	gi|512887474|ref|XP_004921931.1| PREDICTED: SLIT and NTRK-like protein 6-like [Bombyx mori]
79	BGIBMGA004546	gi|512894841|ref|XP_004923527.1| PREDICTED: LOW QUALITY PROTEIN: twitchin-like [Bombyx mori]
79	BGIBMGA004547	gi|512894841|ref|XP_004923527.1| PREDICTED: LOW QUALITY PROTEIN: twitchin-like [Bombyx mori]
79	BGIBMGA012494	gi|512896883|ref|XP_004924018.1| PREDICTED: uncharacterized protein LOC101741905 isoform X1 [Bombyx mori]
79	BGIBMGA013816	gi|512898251|ref|XP_004924354.1| PREDICTED: hydroxylysine kinase-like [Bombyx mori]
79	BGIBMGA009088	gi|512898417|ref|XP_004924395.1| PREDICTED: uncharacterized protein LOC101737434 isoform X2 [Bombyx mori]
79	BGIBMGA007494	gi|512899603|ref|XP_004924686.1| PREDICTED: multidrug resistance protein 1A-like isoform X1 [Bombyx mori] gi|512899606|ref|XP_004924687.1| PREDICTED: multidrug resistance protein 1A-like isoform X2 [Bombyx mori]
79	BGIBMGA012680	gi|512900044|ref|XP_004924796.1| PREDICTED: four and a half LIM domains protein 2-like isoform X3 [Bombyx mori]
79	BGIBMGA014126	gi|512901593|ref|XP_004925173.1| PREDICTED: RING finger protein nhl-1-like isoform X1 [Bombyx mori] gi|512901597|ref|XP_004925174.1| PREDICTED: RING finger protein nhl-1-like isoform X2 [Bombyx mori]
79	BGIBMGA012548	gi|512901857|ref|XP_004925235.1| PREDICTED: sphingomyelin phosphodiesterase-like [Bombyx mori]
79	BGIBMGA003326	gi|512902786|ref|XP_004925460.1| PREDICTED: uncharacterized protein LOC101738880 isoform X2 [Bombyx mori] gi|512902790|ref|XP_004925461.1| PREDICTED: uncharacterized protein LOC101738880 isoform X3 [Bombyx mori] gi|512902794|ref|XP_004925462.1| PREDICTED: uncharacterized protein LOC101738880 isoform X4 [Bombyx mori] gi|512902798|ref|XP_004925463.1| PREDICTED: uncharacterized protein LOC101738880 …
79	BGIBMGA007278	gi|512905068|ref|XP_004925853.1| PREDICTED: putative inorganic phosphate cotransporter-like [Bombyx mori]
79	BGIBMGA007280	gi|512905259|ref|XP_004925899.1| PREDICTED: putative inorganic phosphate cotransporter-like [Bombyx mori]
79	BGIBMGA013638	gi|512907994|ref|XP_004926573.1| PREDICTED: synaptic vesicle 2-related protein-like [Bombyx mori]
79	BGIBMGA012221	gi|512911580|ref|XP_004927448.1| PREDICTED: melanotransferrin-like [Bombyx mori]
79	BGIBMGA007324	gi|512911603|ref|XP_004927453.1| PREDICTED: homogentisate 1,2-dioxygenase-like [Bombyx mori]
79	BGIBMGA009199	gi|512911768|ref|XP_004927493.1| PREDICTED: organic cation transporter protein-like [Bombyx mori]
79	BGIBMGA014428	gi|512912568|ref|XP_004927690.1| PREDICTED: collagenase-like [Bombyx mori]
79	BGIBMGA000896	gi|512913554|ref|XP_004927925.1| PREDICTED: zinc transporter 8-like [Bombyx mori]
79	BGIBMGA001491	gi|512920851|ref|XP_004929736.1| PREDICTED: chondroitin proteoglycan 2-like [Bombyx mori]
79	BGIBMGA001504	gi|512920899|ref|XP_004929748.1| PREDICTED: chondroitin proteoglycan 2-like, partial [Bombyx mori]
79	BGIBMGA010741	gi|512934415|ref|XP_004933027.1| PREDICTED: facilitated trehalose transporter Tret1-like [Bombyx mori]
79	BGIBMGA000612	gi|531996938|gb|AGT62469.1| paramyosin, partial [Bicyclus anynana]
79	BGIBMGA014429	gi|61191881|gb|AAX39408.1| serine protease [Bombyx mandarina] gi|164470774|gb|ABY58153.1| serine protease [Bombyx mandarina]
79	BGIBMGA003322	no hints
79	BGIBMGA005970	no hints
79	BGIBMGA014298	no hints
80	BGIBMGA004865	gi|112983654|ref|NP_001036872.1| Bombyrin precursor [Bombyx mori]
80	BGIBMGA008861	gi|114051976|ref|NP_001040443.1| troponin C 25D [Bombyx mori] gi|95102914|gb|ABF51398.1| troponin C 25D [Bombyx mori] gi|168472701|gb|ACA24126.1| troponin C 25D [Bombyx mandarina]
80	BGIBMGA013700	gi|114052138|ref|NP_001040221.1| troponin T [Bombyx mori] gi|87248429|gb|ABD36267.1| troponin T [Bombyx mori]
80	BGIBMGA001201	gi|114052470|ref|NP_001040476.1| muscular protein 20 [Bombyx mori] gi|95103052|gb|ABF51467.1| muscular protein 20 [Bombyx mori]
80	BGIBMGA005786	gi|153791757|ref|NP_001093275.1| myo-inositol oxygenase [Bombyx mori] gi|95102966|gb|ABF51424.1| myo-inositol oxygenase [Bombyx mori]
80	BGIBMGA001202	gi|160333386|ref|NP_001103762.1| muscle LIM protein isoform 1 [Bombyx mori] gi|87248175|gb|ABD36140.1| muscle LIM protein [Bombyx mori]
80	BGIBMGA005024	gi|160425399|gb|ABX39543.1| single domain major allergen protein [Gonepteryx rhamni]
80	BGIBMGA001031	gi|225346691|gb|ACN86368.1| troponin I transcript variant A [Bombyx mandarina]
80	BGIBMGA001030	gi|225346693|gb|ACN86369.1| troponin I transcript variant B [Bombyx mandarina]
80	BGIBMGA000736	gi|389609045|dbj|BAM18134.1| unknown unsecreted protein [Papilio xuthus]
80	BGIBMGA000737	gi|389609045|dbj|BAM18134.1| unknown unsecreted protein [Papilio xuthus]
80	BGIBMGA005599	gi|512887474|ref|XP_004921931.1| PREDICTED: SLIT and NTRK-like protein 6-like [Bombyx mori]
80	BGIBMGA004546	gi|512894841|ref|XP_004923527.1| PREDICTED: LOW QUALITY PROTEIN: twitchin-like [Bombyx mori]
80	BGIBMGA004547	gi|512894841|ref|XP_004923527.1| PREDICTED: LOW QUALITY PROTEIN: twitchin-like [Bombyx mori]
80	BGIBMGA012494	gi|512896883|ref|XP_004924018.1| PREDICTED: uncharacterized protein LOC101741905 isoform X1 [Bombyx mori]
80	BGIBMGA009088	gi|512898417|ref|XP_004924395.1| PREDICTED: uncharacterized protein LOC101737434 isoform X2 [Bombyx mori]
80	BGIBMGA007494	gi|512899603|ref|XP_004924686.1| PREDICTED: multidrug resistance protein 1A-like isoform X1 [Bombyx mori] gi|512899606|ref|XP_004924687.1| PREDICTED: multidrug resistance protein 1A-like isoform X2 [Bombyx mori]
80	BGIBMGA012680	gi|512900044|ref|XP_004924796.1| PREDICTED: four and a half LIM domains protein 2-like isoform X3 [Bombyx mori]
80	BGIBMGA014126	gi|512901593|ref|XP_004925173.1| PREDICTED: RING finger protein nhl-1-like isoform X1 [Bombyx mori] gi|512901597|ref|XP_004925174.1| PREDICTED: RING finger protein nhl-1-like isoform X2 [Bombyx mori]
80	BGIBMGA012548	gi|512901857|ref|XP_004925235.1| PREDICTED: sphingomyelin phosphodiesterase-like [Bombyx mori]
80	BGIBMGA003326	gi|512902786|ref|XP_004925460.1| PREDICTED: uncharacterized protein LOC101738880 isoform X2 [Bombyx mori] gi|512902790|ref|XP_004925461.1| PREDICTED: uncharacterized protein LOC101738880 isoform X3 [Bombyx mori] gi|512902794|ref|XP_004925462.1| PREDICTED: uncharacterized protein LOC101738880 isoform X4 [Bombyx mori] gi|512902798|ref|XP_004925463.1| PREDICTED: uncharacterized protein LOC101738880 …
80	BGIBMGA007278	gi|512905068|ref|XP_004925853.1| PREDICTED: putative inorganic phosphate cotransporter-like [Bombyx mori]
80	BGIBMGA007280	gi|512905259|ref|XP_004925899.1| PREDICTED: putative inorganic phosphate cotransporter-like [Bombyx mori]
80	BGIBMGA013638	gi|512907994|ref|XP_004926573.1| PREDICTED: synaptic vesicle 2-related protein-like [Bombyx mori]
80	BGIBMGA012221	gi|512911580|ref|XP_004927448.1| PREDICTED: melanotransferrin-like [Bombyx mori]
80	BGIBMGA007324	gi|512911603|ref|XP_004927453.1| PREDICTED: homogentisate 1,2-dioxygenase-like [Bombyx mori]
80	BGIBMGA009199	gi|512911768|ref|XP_004927493.1| PREDICTED: organic cation transporter protein-like [Bombyx mori]
80	BGIBMGA014428	gi|512912568|ref|XP_004927690.1| PREDICTED: collagenase-like [Bombyx mori]
80	BGIBMGA000896	gi|512913554|ref|XP_004927925.1| PREDICTED: zinc transporter 8-like [Bombyx mori]
80	BGIBMGA001491	gi|512920851|ref|XP_004929736.1| PREDICTED: chondroitin proteoglycan 2-like [Bombyx mori]
80	BGIBMGA001504	gi|512920899|ref|XP_004929748.1| PREDICTED: chondroitin proteoglycan 2-like, partial [Bombyx mori]
80	BGIBMGA010741	gi|512934415|ref|XP_004933027.1| PREDICTED: facilitated trehalose transporter Tret1-like [Bombyx mori]
80	BGIBMGA000612	gi|531996938|gb|AGT62469.1| paramyosin, partial [Bicyclus anynana]
80	BGIBMGA014429	gi|61191881|gb|AAX39408.1| serine protease [Bombyx mandarina] gi|164470774|gb|ABY58153.1| serine protease [Bombyx mandarina]
80	AK382731	NA
80	BGIBMGA003322	no hints
80	BGIBMGA005970	no hints
80	BGIBMGA014298	no hints
81	BGIBMGA004865	gi|112983654|ref|NP_001036872.1| Bombyrin precursor [Bombyx mori]
81	BGIBMGA008861	gi|114051976|ref|NP_001040443.1| troponin C 25D [Bombyx mori] gi|95102914|gb|ABF51398.1| troponin C 25D [Bombyx mori] gi|168472701|gb|ACA24126.1| troponin C 25D [Bombyx mandarina]
81	BGIBMGA013700	gi|114052138|ref|NP_001040221.1| troponin T [Bombyx mori] gi|87248429|gb|ABD36267.1| troponin T [Bombyx mori]
81	BGIBMGA001201	gi|114052470|ref|NP_001040476.1| muscular protein 20 [Bombyx mori] gi|95103052|gb|ABF51467.1| muscular protein 20 [Bombyx mori]
81	BGIBMGA005786	gi|153791757|ref|NP_001093275.1| myo-inositol oxygenase [Bombyx mori] gi|95102966|gb|ABF51424.1| myo-inositol oxygenase [Bombyx mori]
81	BGIBMGA001202	gi|160333386|ref|NP_001103762.1| muscle LIM protein isoform 1 [Bombyx mori] gi|87248175|gb|ABD36140.1| muscle LIM protein [Bombyx mori]
81	BGIBMGA001031	gi|225346691|gb|ACN86368.1| troponin I transcript variant A [Bombyx mandarina]
81	BGIBMGA001030	gi|225346693|gb|ACN86369.1| troponin I transcript variant B [Bombyx mandarina]
81	BGIBMGA000737	gi|389609045|dbj|BAM18134.1| unknown unsecreted protein [Papilio xuthus]
81	BGIBMGA005599	gi|512887474|ref|XP_004921931.1| PREDICTED: SLIT and NTRK-like protein 6-like [Bombyx mori]
81	BGIBMGA004546	gi|512894841|ref|XP_004923527.1| PREDICTED: LOW QUALITY PROTEIN: twitchin-like [Bombyx mori]
81	BGIBMGA004547	gi|512894841|ref|XP_004923527.1| PREDICTED: LOW QUALITY PROTEIN: twitchin-like [Bombyx mori]
81	BGIBMGA012494	gi|512896883|ref|XP_004924018.1| PREDICTED: uncharacterized protein LOC101741905 isoform X1 [Bombyx mori]
81	BGIBMGA013816	gi|512898251|ref|XP_004924354.1| PREDICTED: hydroxylysine kinase-like [Bombyx mori]
81	BGIBMGA009088	gi|512898417|ref|XP_004924395.1| PREDICTED: uncharacterized protein LOC101737434 isoform X2 [Bombyx mori]
81	BGIBMGA007494	gi|512899603|ref|XP_004924686.1| PREDICTED: multidrug resistance protein 1A-like isoform X1 [Bombyx mori] gi|512899606|ref|XP_004924687.1| PREDICTED: multidrug resistance protein 1A-like isoform X2 [Bombyx mori]
81	BGIBMGA012680	gi|512900044|ref|XP_004924796.1| PREDICTED: four and a half LIM domains protein 2-like isoform X3 [Bombyx mori]
81	BGIBMGA014126	gi|512901593|ref|XP_004925173.1| PREDICTED: RING finger protein nhl-1-like isoform X1 [Bombyx mori] gi|512901597|ref|XP_004925174.1| PREDICTED: RING finger protein nhl-1-like isoform X2 [Bombyx mori]
81	BGIBMGA012548	gi|512901857|ref|XP_004925235.1| PREDICTED: sphingomyelin phosphodiesterase-like [Bombyx mori]
81	BGIBMGA003326	gi|512902786|ref|XP_004925460.1| PREDICTED: uncharacterized protein LOC101738880 isoform X2 [Bombyx mori] gi|512902790|ref|XP_004925461.1| PREDICTED: uncharacterized protein LOC101738880 isoform X3 [Bombyx mori] gi|512902794|ref|XP_004925462.1| PREDICTED: uncharacterized protein LOC101738880 isoform X4 [Bombyx mori] gi|512902798|ref|XP_004925463.1| PREDICTED: uncharacterized protein LOC101738880 …
81	BGIBMGA007278	gi|512905068|ref|XP_004925853.1| PREDICTED: putative inorganic phosphate cotransporter-like [Bombyx mori]
81	BGIBMGA007280	gi|512905259|ref|XP_004925899.1| PREDICTED: putative inorganic phosphate cotransporter-like [Bombyx mori]
81	BGIBMGA014149	gi|512906413|ref|XP_004926190.1| PREDICTED: myrosinase 1-like [Bombyx mori]
81	BGIBMGA013638	gi|512907994|ref|XP_004926573.1| PREDICTED: synaptic vesicle 2-related protein-like [Bombyx mori]
81	BGIBMGA012221	gi|512911580|ref|XP_004927448.1| PREDICTED: melanotransferrin-like [Bombyx mori]
81	BGIBMGA007324	gi|512911603|ref|XP_004927453.1| PREDICTED: homogentisate 1,2-dioxygenase-like [Bombyx mori]
81	BGIBMGA009199	gi|512911768|ref|XP_004927493.1| PREDICTED: organic cation transporter protein-like [Bombyx mori]
81	BGIBMGA014428	gi|512912568|ref|XP_004927690.1| PREDICTED: collagenase-like [Bombyx mori]
81	BGIBMGA000896	gi|512913554|ref|XP_004927925.1| PREDICTED: zinc transporter 8-like [Bombyx mori]
81	BGIBMGA001491	gi|512920851|ref|XP_004929736.1| PREDICTED: chondroitin proteoglycan 2-like [Bombyx mori]
81	BGIBMGA001504	gi|512920899|ref|XP_004929748.1| PREDICTED: chondroitin proteoglycan 2-like, partial [Bombyx mori]
81	BGIBMGA010741	gi|512934415|ref|XP_004933027.1| PREDICTED: facilitated trehalose transporter Tret1-like [Bombyx mori]
81	BGIBMGA000065	gi|512939991|ref|XP_004934367.1| PREDICTED: cystathionine beta-synthase-like isoform X2 [Bombyx mori]
81	BGIBMGA000612	gi|531996938|gb|AGT62469.1| paramyosin, partial [Bicyclus anynana]
81	BGIBMGA014429	gi|61191881|gb|AAX39408.1| serine protease [Bombyx mandarina] gi|164470774|gb|ABY58153.1| serine protease [Bombyx mandarina]
81	BGIBMGA003322	no hints
81	BGIBMGA005970	no hints
81	BGIBMGA014298	no hints
82	BGIBMGA004865	gi|112983654|ref|NP_001036872.1| Bombyrin precursor [Bombyx mori]
82	BGIBMGA008861	gi|114051976|ref|NP_001040443.1| troponin C 25D [Bombyx mori] gi|95102914|gb|ABF51398.1| troponin C 25D [Bombyx mori] gi|168472701|gb|ACA24126.1| troponin C 25D [Bombyx mandarina]
82	BGIBMGA013700	gi|114052138|ref|NP_001040221.1| troponin T [Bombyx mori] gi|87248429|gb|ABD36267.1| troponin T [Bombyx mori]
82	BGIBMGA001201	gi|114052470|ref|NP_001040476.1| muscular protein 20 [Bombyx mori] gi|95103052|gb|ABF51467.1| muscular protein 20 [Bombyx mori]
82	BGIBMGA005786	gi|153791757|ref|NP_001093275.1| myo-inositol oxygenase [Bombyx mori] gi|95102966|gb|ABF51424.1| myo-inositol oxygenase [Bombyx mori]
82	BGIBMGA001202	gi|160333386|ref|NP_001103762.1| muscle LIM protein isoform 1 [Bombyx mori] gi|87248175|gb|ABD36140.1| muscle LIM protein [Bombyx mori]
82	BGIBMGA005024	gi|160425399|gb|ABX39543.1| single domain major allergen protein [Gonepteryx rhamni]
82	BGIBMGA001031	gi|225346691|gb|ACN86368.1| troponin I transcript variant A [Bombyx mandarina]
82	BGIBMGA001030	gi|225346693|gb|ACN86369.1| troponin I transcript variant B [Bombyx mandarina]
82	BGIBMGA000737	gi|389609045|dbj|BAM18134.1| unknown unsecreted protein [Papilio xuthus]
82	BGIBMGA005599	gi|512887474|ref|XP_004921931.1| PREDICTED: SLIT and NTRK-like protein 6-like [Bombyx mori]
82	BGIBMGA004546	gi|512894841|ref|XP_004923527.1| PREDICTED: LOW QUALITY PROTEIN: twitchin-like [Bombyx mori]
82	BGIBMGA004547	gi|512894841|ref|XP_004923527.1| PREDICTED: LOW QUALITY PROTEIN: twitchin-like [Bombyx mori]
82	BGIBMGA012494	gi|512896883|ref|XP_004924018.1| PREDICTED: uncharacterized protein LOC101741905 isoform X1 [Bombyx mori]
82	BGIBMGA009088	gi|512898417|ref|XP_004924395.1| PREDICTED: uncharacterized protein LOC101737434 isoform X2 [Bombyx mori]
82	BGIBMGA007494	gi|512899603|ref|XP_004924686.1| PREDICTED: multidrug resistance protein 1A-like isoform X1 [Bombyx mori] gi|512899606|ref|XP_004924687.1| PREDICTED: multidrug resistance protein 1A-like isoform X2 [Bombyx mori]
82	BGIBMGA012680	gi|512900044|ref|XP_004924796.1| PREDICTED: four and a half LIM domains protein 2-like isoform X3 [Bombyx mori]
82	BGIBMGA014126	gi|512901593|ref|XP_004925173.1| PREDICTED: RING finger protein nhl-1-like isoform X1 [Bombyx mori] gi|512901597|ref|XP_004925174.1| PREDICTED: RING finger protein nhl-1-like isoform X2 [Bombyx mori]
82	BGIBMGA012548	gi|512901857|ref|XP_004925235.1| PREDICTED: sphingomyelin phosphodiesterase-like [Bombyx mori]
82	BGIBMGA003326	gi|512902786|ref|XP_004925460.1| PREDICTED: uncharacterized protein LOC101738880 isoform X2 [Bombyx mori] gi|512902790|ref|XP_004925461.1| PREDICTED: uncharacterized protein LOC101738880 isoform X3 [Bombyx mori] gi|512902794|ref|XP_004925462.1| PREDICTED: uncharacterized protein LOC101738880 isoform X4 [Bombyx mori] gi|512902798|ref|XP_004925463.1| PREDICTED: uncharacterized protein LOC101738880 …
82	BGIBMGA007278	gi|512905068|ref|XP_004925853.1| PREDICTED: putative inorganic phosphate cotransporter-like [Bombyx mori]
82	BGIBMGA007280	gi|512905259|ref|XP_004925899.1| PREDICTED: putative inorganic phosphate cotransporter-like [Bombyx mori]
82	BGIBMGA014149	gi|512906413|ref|XP_004926190.1| PREDICTED: myrosinase 1-like [Bombyx mori]
82	BGIBMGA013638	gi|512907994|ref|XP_004926573.1| PREDICTED: synaptic vesicle 2-related protein-like [Bombyx mori]
82	BGIBMGA012221	gi|512911580|ref|XP_004927448.1| PREDICTED: melanotransferrin-like [Bombyx mori]
82	BGIBMGA007324	gi|512911603|ref|XP_004927453.1| PREDICTED: homogentisate 1,2-dioxygenase-like [Bombyx mori]
82	BGIBMGA009199	gi|512911768|ref|XP_004927493.1| PREDICTED: organic cation transporter protein-like [Bombyx mori]
82	BGIBMGA014428	gi|512912568|ref|XP_004927690.1| PREDICTED: collagenase-like [Bombyx mori]
82	BGIBMGA000896	gi|512913554|ref|XP_004927925.1| PREDICTED: zinc transporter 8-like [Bombyx mori]
82	BGIBMGA001276	gi|512913741|ref|XP_004927968.1| PREDICTED: cytochrome P450 CYP12A2-like isoform X1 [Bombyx mori] gi|433339062|dbj|BAM73885.1| cytochrome P450 [Bombyx mori] gi|433339071|dbj|BAM73888.1| cytochrome P450 [Bombyx mori]
82	BGIBMGA001491	gi|512920851|ref|XP_004929736.1| PREDICTED: chondroitin proteoglycan 2-like [Bombyx mori]
82	BGIBMGA001504	gi|512920899|ref|XP_004929748.1| PREDICTED: chondroitin proteoglycan 2-like, partial [Bombyx mori]
82	BGIBMGA010741	gi|512934415|ref|XP_004933027.1| PREDICTED: facilitated trehalose transporter Tret1-like [Bombyx mori]
82	BGIBMGA000065	gi|512939991|ref|XP_004934367.1| PREDICTED: cystathionine beta-synthase-like isoform X2 [Bombyx mori]
82	BGIBMGA000612	gi|531996938|gb|AGT62469.1| paramyosin, partial [Bicyclus anynana]
82	BGIBMGA014429	gi|61191881|gb|AAX39408.1| serine protease [Bombyx mandarina] gi|164470774|gb|ABY58153.1| serine protease [Bombyx mandarina]
82	AK382731	NA
82	BGIBMGA003322	no hints
82	BGIBMGA005970	no hints
82	BGIBMGA014298	no hints
